# Supplementary material for: Recent trend reversal for declining European seagrass meadows
Source: PubMed Central journal article supplement (PMC6659699; doi:10.1038/s41467-019-11340-4), 2019-07-26

**Supplementary Data 2.** Visualisation of the compiled time-series of extent and/or density of seagrass sites in Europe, with time-windows from 1869 to 2016.

Elements in each figure are (see example below):

1. Code of the assessment (site ID\_metric), as in Supplementary Data 1.
2. Code of the source, as in Supplementary Data 1.
3. Name of the site (country - region) - Species code (if known, depth in m).
4. Overall analysis: Net rate of change (units depend on the metric), specific rate of change (% yr-1), and percentage of change (%) for the overall time period (from first to last observation) > trajectory for the overall time period (decrease, increase, no change).
5. Decadal analysis: Whether the time-series is included or not in the decadal analysis (YES or NO). Time window is given between brackets (in years). Next lines shows: decade, trajectory for that decade using the observations at the decade boundaries, evolution of the trajectory (from previous decade), specific rate of change for that decade (% yr-1), and time window available for that decade.
6. Dark blue dots are observed values, light blue dots are interpolated values, purple circles show values used for the decadal calculations, red crosses indicate absence of seagrasses for that year (either based on observation or interpolations).
7. Grey dashed lines separate decades.

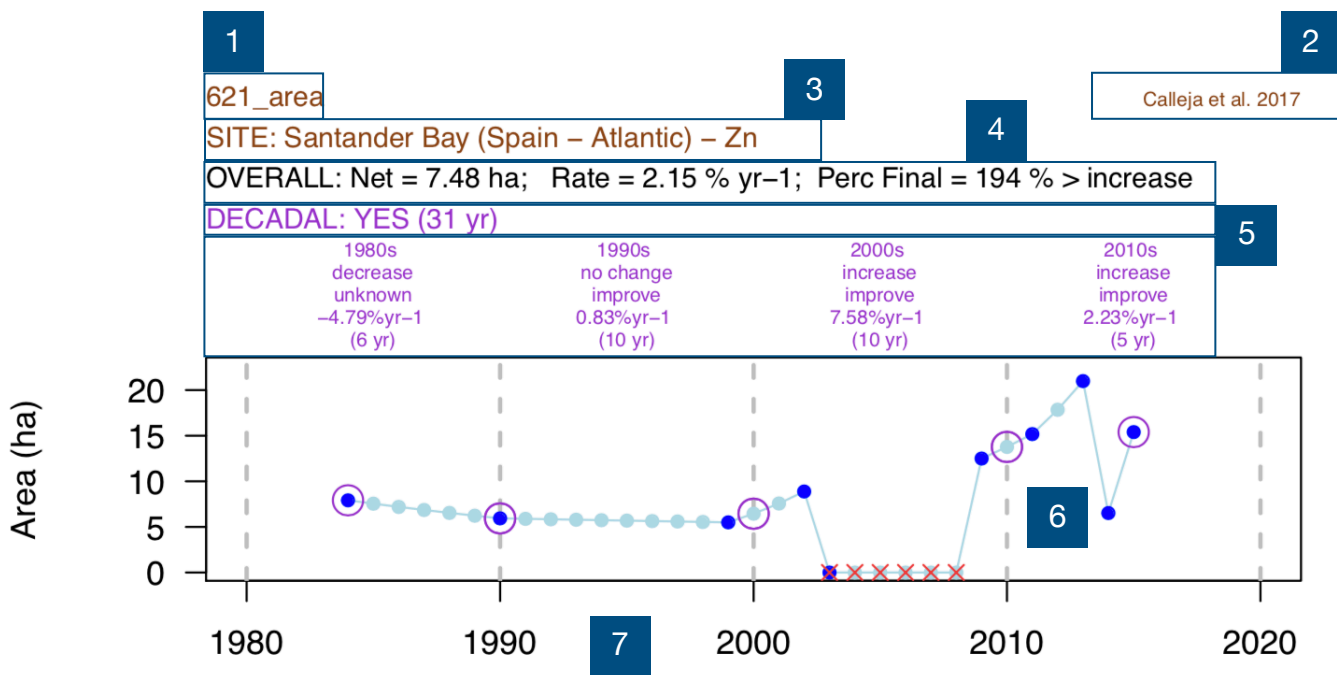

### 3\_area

Cochón and Sánchez 2005

SITE: Ría de Pontevedra (Spain – Atlantic) – Zn (? m)

OVERALL: Net = -167.94 ha; Rate = -2.09 % yr<sup>-1</sup>; Perc Final = 32 % > decrease

DECADAL: YES (54 yr)

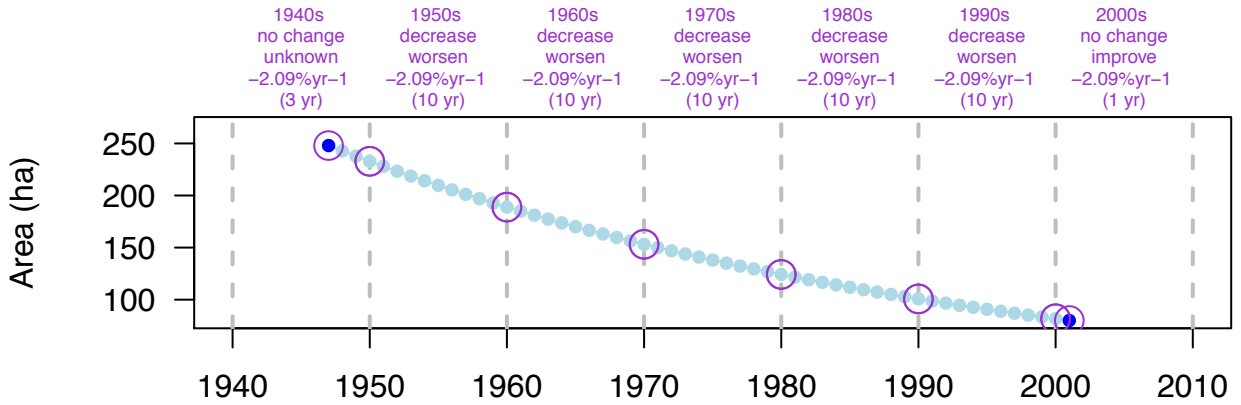

### 5\_area

Castellanos et al. 2003

SITE: Ría de Foz (Spain – Atlantic) – Zn (? m)

OVERALL: Net = 24.5 ha; Rate = 1.54 % yr<sup>-1</sup>; Perc Final = 132 % > increase

DECADAL: YES (18 yr)

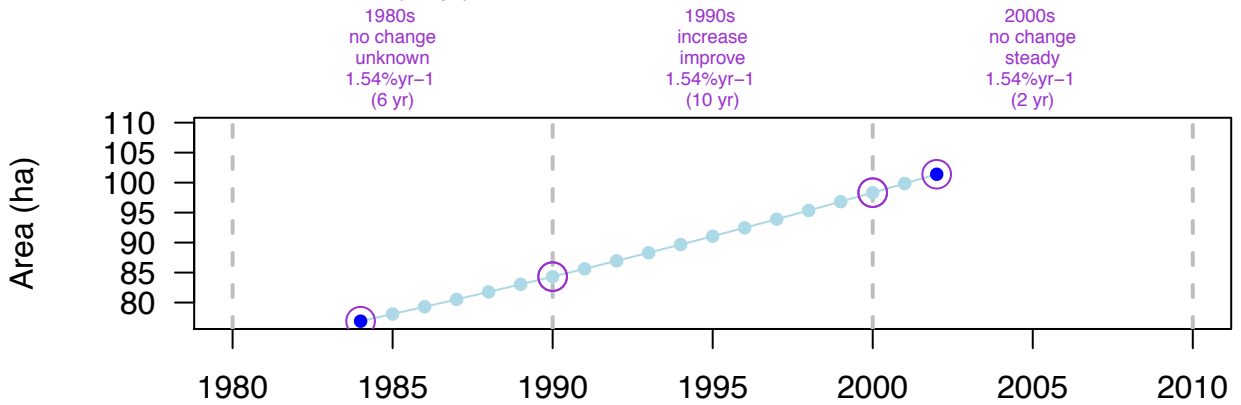

7\_lowerlimit

Whelan 1986 (in Hily et al. 2003)

SITE: Ventry Bay (Ireland – Atlantic) – Zm (–13 m)

OVERALL: Net = –3 m; Rate = –13.12 % yr<sup>-1</sup>; Perc Final = 77 % > decrease

DECADAL: NO (2 yr)

Lower depth limit (m)

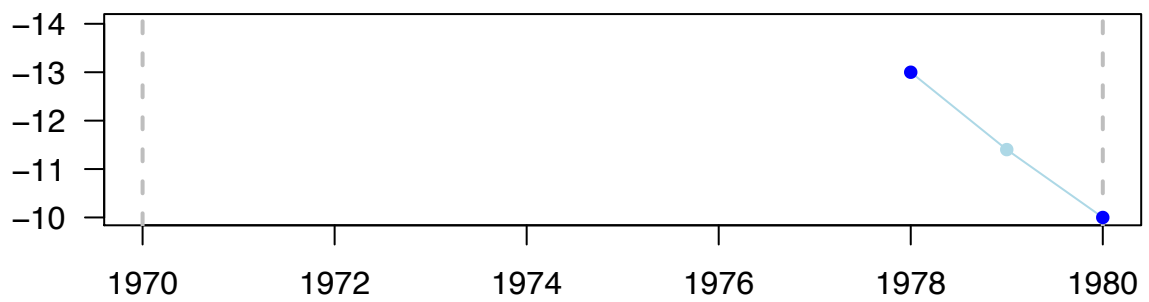

8\_area

Tagliapietra et al. 1998, Rismonto and Mion 2008

SITE: Venice Lagoon (Italy – Mediterranean) – Zn (? m)

OVERALL: Net = –28 ha; Rate = –54.93 % yr<sup>-1</sup>; Perc Final = 33 % > decrease

DECADAL: NO (2 yr)

Area (ha)

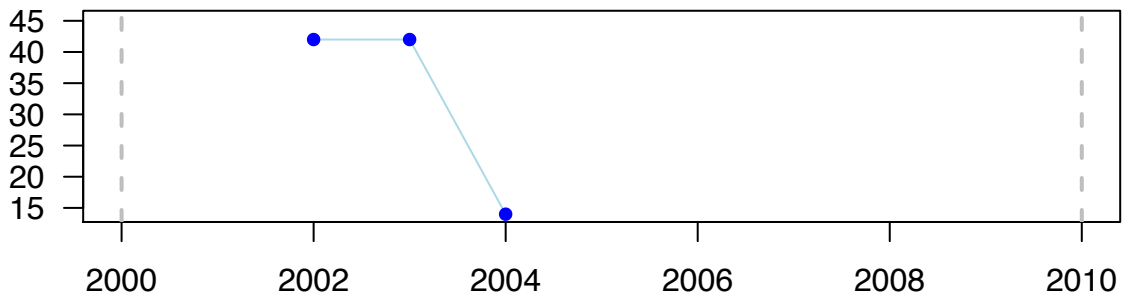

9\_area

Arconada et al. 2013

SITE: Águilas (desalination plant) (Spain – Mediterranean) – Po (? m)

OVERALL: Net = -25.86 ha; Rate = -3.77 % yr<sup>-1</sup>; Perc Final = 77 % > decrease

DECADAL: NO (7 yr)

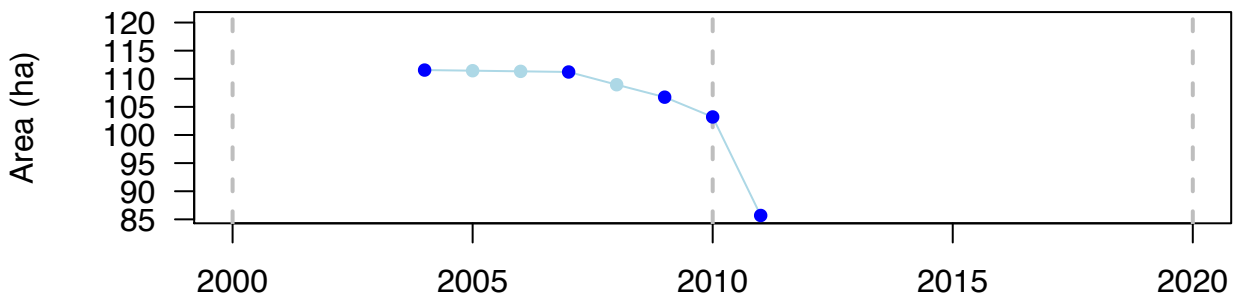

11\_area

Ardizzone et al. 2006

SITE: Cape Circeo and Sperlonga (Italy – Mediterranean) – Po (? m)

OVERALL: Net = -4364.8 ha; Rate = -1.98 % yr<sup>-1</sup>; Perc Final = 40 % > decrease

DECADAL: YES (46 yr)

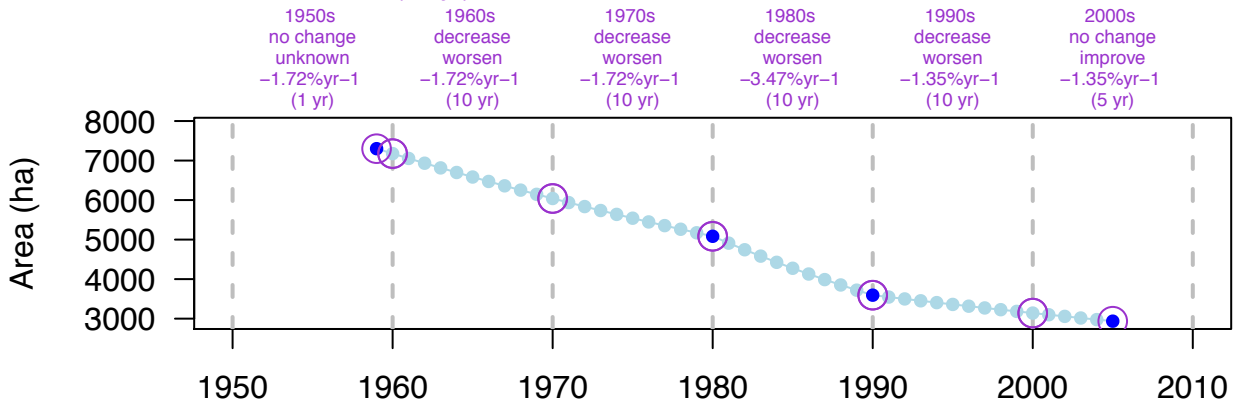

11\_lowerlimit

Ardizzone et al. 2006

SITE: Cape Circeo and Sperlonga (Italy – Mediterranean) – Po (? m)

OVERALL: Net = -10.63 m; Rate = -0.78 % yr<sup>-1</sup>; Perc Final = 70 % > decrease

DECADAL: YES (46 yr)

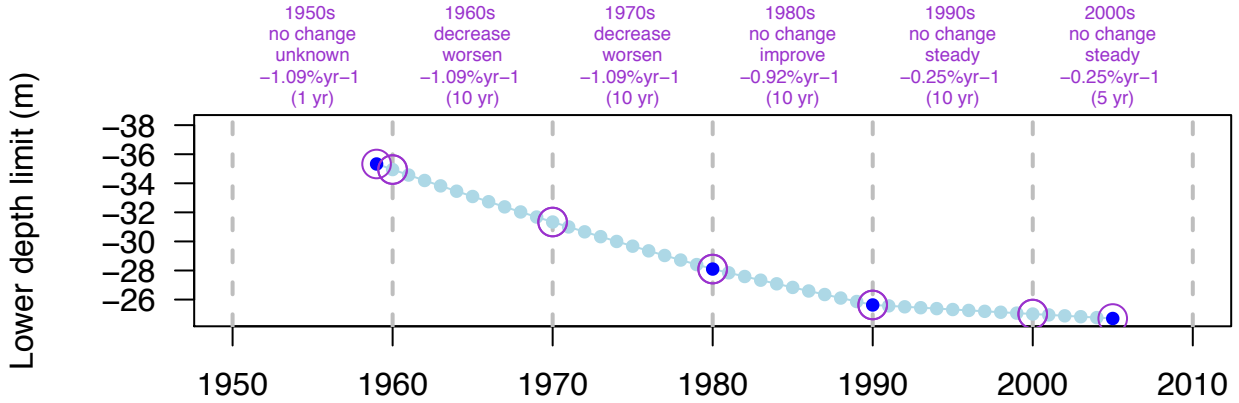

11\_upperlimit

Ardizzone et al. 2006

SITE: Cape Circeo and Sperlonga (Italy – Mediterranean) – Po (? m)

OVERALL: Net = -2.33 m; Rate = -0.33 % yr<sup>-1</sup>; Perc Final = 86 % > decrease

DECADAL: YES (46 yr)

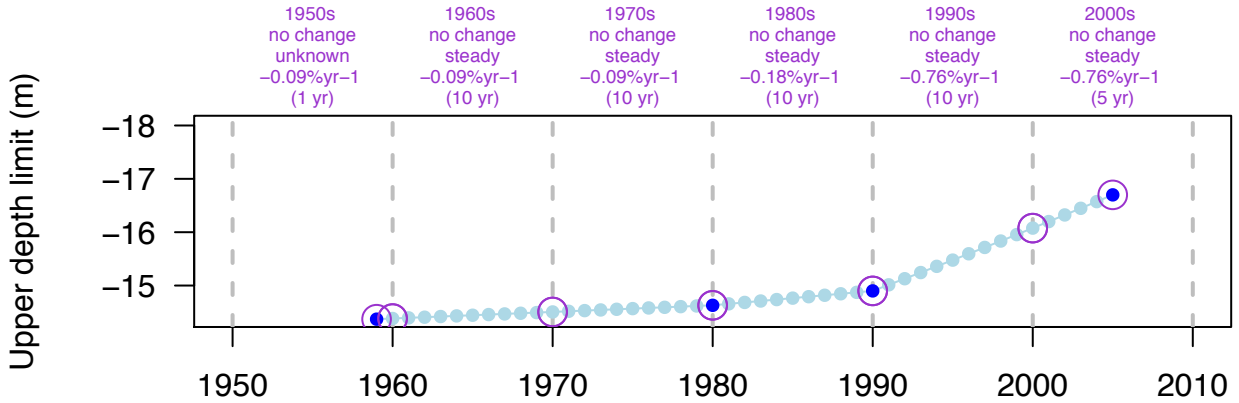

12\_cover

Marbà et al. 2015

SITE: Agua Amarga (POS\_08) (Spain – Mediterranean) – Po (-13 m)

OVERALL: Net = -10.5 %; Rate = -12.2 % yr<sup>-1</sup>; Perc Final = 78 % > no change

DECADAL: NO (2 yr)

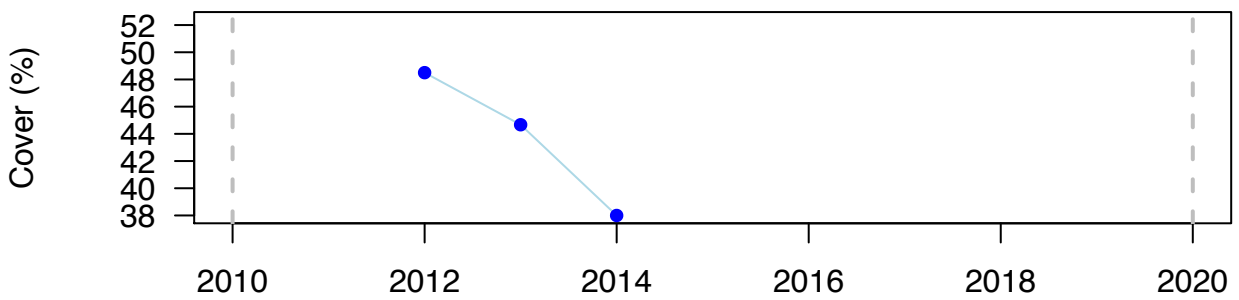

12\_density

Marbà et al. 2015

SITE: Agua Amarga (POS\_08) (Spain – Mediterranean) – Po (-13 m)

OVERALL: Net = -111.12 shoot m<sup>-2</sup>; Rate = -14.93 % yr<sup>-1</sup>; Perc Final = 74 % > decrease

DECADAL: NO (2 yr)

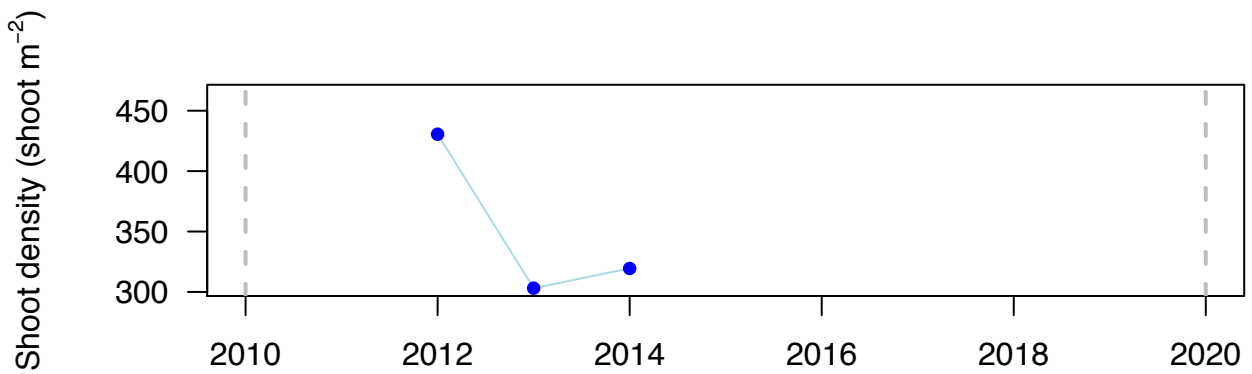

13\_density

Marbà et al. 2015

SITE: Carnaje (POS\_10) (Spain – Mediterranean) – Po (-13 m)

OVERALL: Net = 43.97 shoot m<sup>-2</sup>; Rate = 4.21 % yr<sup>-1</sup>; Perc Final = 109 % > no change

DECADAL: NO (2 yr)

Shoot density (shoot m<sup>-2</sup>)

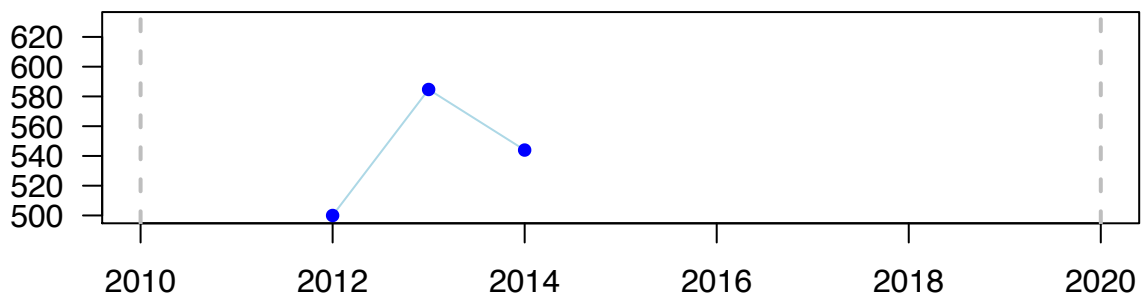

14\_cover

Marbà et al. 2015

SITE: Las Negras (POS\_09) (Spain – Mediterranean) – Po (-11 m)

OVERALL: Net = 22.53 %; Rate = 17.69 % yr<sup>-1</sup>; Perc Final = 142 % > increase

DECADAL: NO (2 yr)

Cover (%)

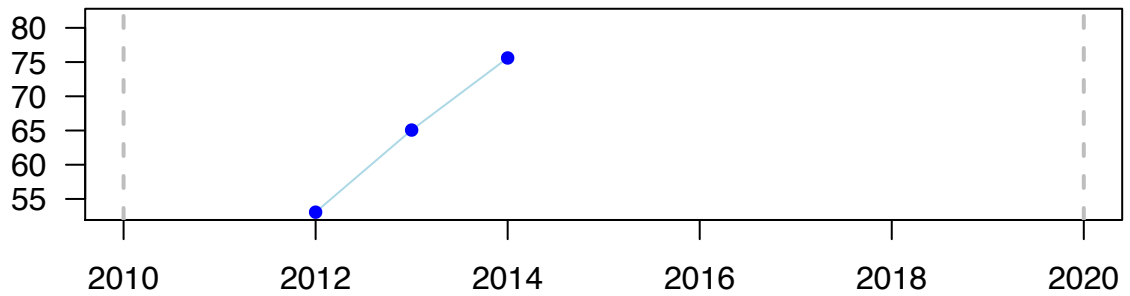

14\_density

Marbà et al. 2015

SITE: Las Negras (POS\_09) (Spain – Mediterranean) – Po (-11 m)

OVERALL: Net = -33.92 shoot m<sup>-2</sup>; Rate = -2.49 % yr<sup>-1</sup>; Perc Final = 95 % > no change

DECADAL: NO (2 yr)

Shoot density (shoot m<sup>-2</sup>)

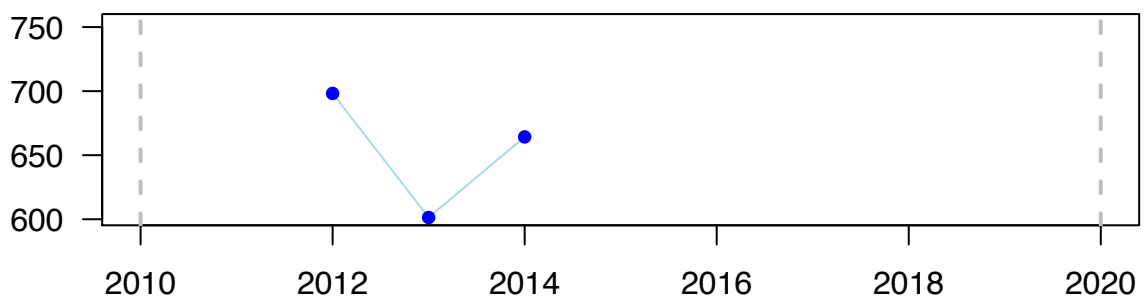

15\_cover

Marbà et al. 2015

SITE: Los Escullos (POS\_11) (Spain – Mediterranean) – Po (-12 m)

OVERALL: Net = 0 %; Rate = 0 % yr<sup>-1</sup>; Perc Final = 100 % > no change

DECADAL: NO (2 yr)

Cover (%)

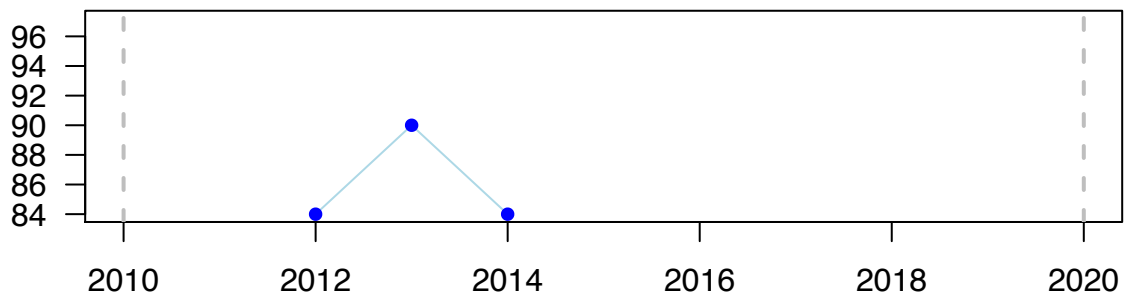



15\_density

Marbà et al. 2015

SITE: Los Escullos (POS\_11) (Spain – Mediterranean) – Po (-12 m)

OVERALL: Net = -166.48 shoot m<sup>-2</sup>; Rate = -17.32 % yr<sup>-1</sup>; Perc Final = 71 % > decrease

DECADAL: NO (2 yr)

Shoot density (shoot m<sup>-2</sup>)

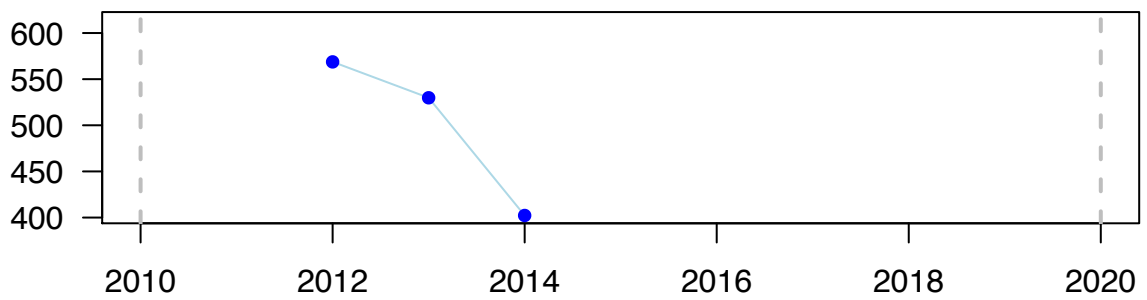

16\_cover

Marbà et al. 2015

SITE: Bajos de Roquetas (POS\_12) (Spain – Mediterranean) – Po (-11.5 m)

OVERALL: Net = 2.53 %; Rate = 1.72 % yr<sup>-1</sup>; Perc Final = 103 % > no change

DECADAL: NO (2 yr)

Cover (%)

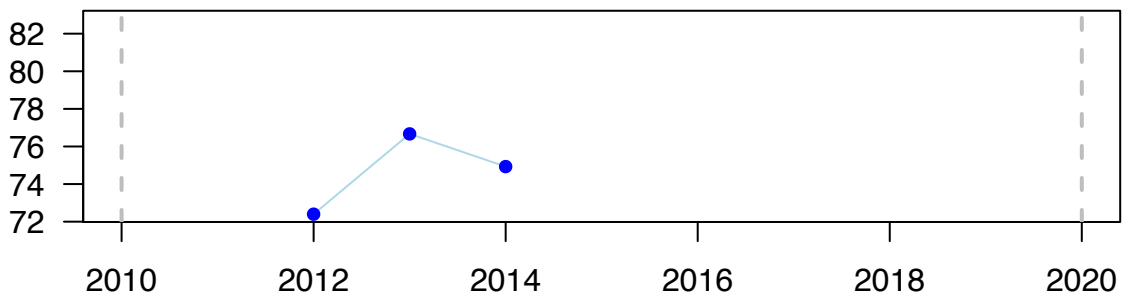

16\_density

Marbà et al. 2015

SITE: Bajos de Roquetas (POS\_12) (Spain – Mediterranean) – Po (-11.5 m)

OVERALL: Net = -60.56 shoot m<sup>-2</sup>; Rate = -7 % yr<sup>-1</sup>; Perc Final = 87 % > no change

DECADAL: NO (2 yr)

Shoot density (shoot m<sup>-2</sup>)

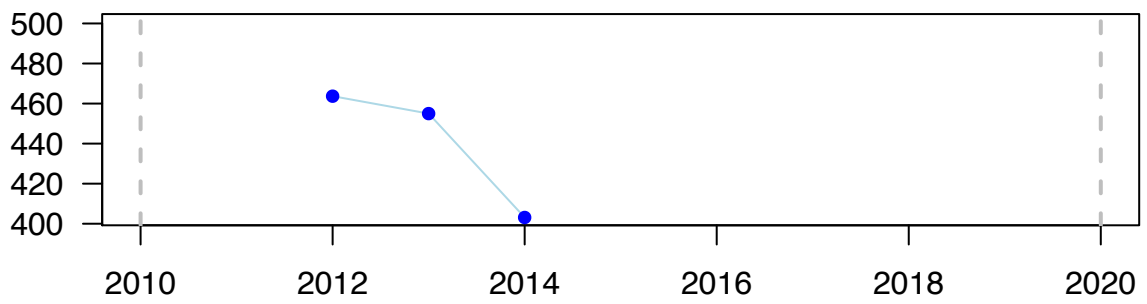

17\_cover

Marbà et al. 2015

SITE: Punta Entinas (POS\_14) (Spain – Mediterranean) – Po (-11 m)

OVERALL: Net = 1.33 %; Rate = 0.8 % yr<sup>-1</sup>; Perc Final = 102 % > no change

DECADAL: NO (2 yr)

Cover (%)

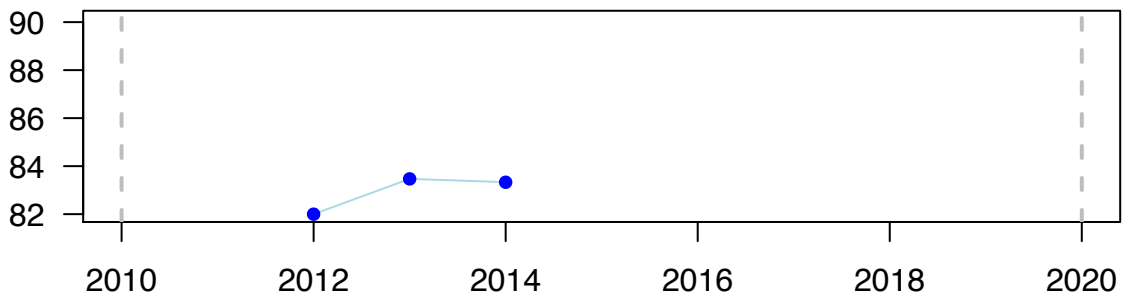

17\_density

Marbà et al. 2015

SITE: Punta Entinas (POS\_14) (Spain – Mediterranean) – Po (-11 m)

OVERALL: Net = 79.49 shoot m<sup>-2</sup>; Rate = 9.87 % yr<sup>-1</sup>; Perc Final = 122 % > no change

DECADAL: NO (2 yr)

Shoot density (shoot m<sup>-2</sup>)

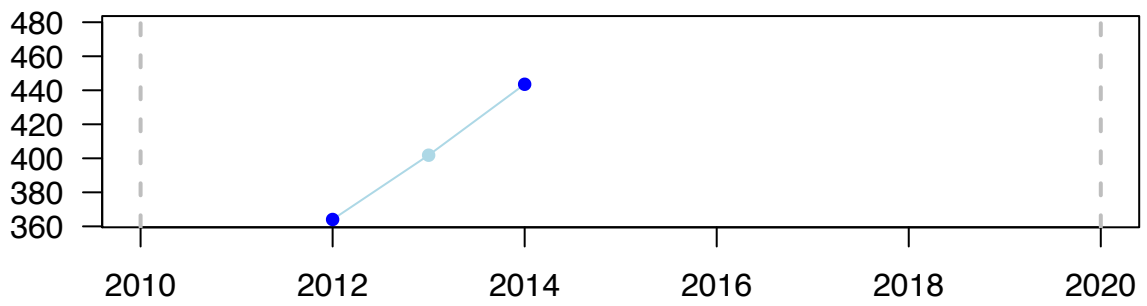

18\_cover

Marbà et al. 2015

SITE: Cocedores (POS\_01) (Spain – Mediterranean) – Po (-11 m)

OVERALL: Net = 12.07 %; Rate = 7.42 % yr<sup>-1</sup>; Perc Final = 116 % > no change

DECADAL: NO (2 yr)

Cover (%)

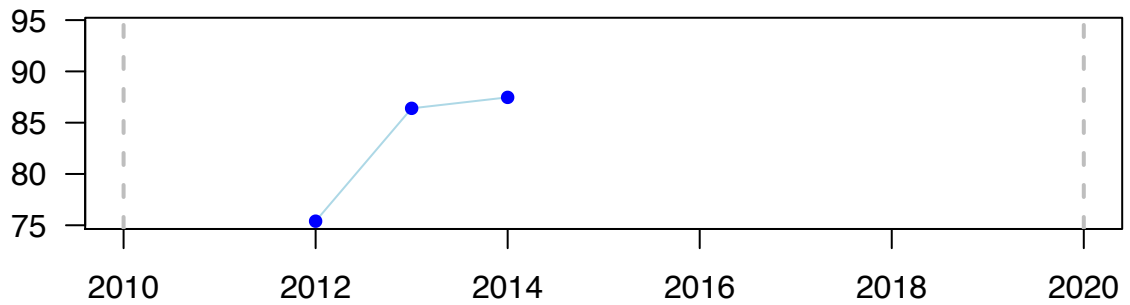

19\_cover

Marbà et al. 2015

SITE: Isla de Terreros (POS\_02) (Spain – Mediterranean) – Po (-11 m)

OVERALL: Net = 16 %; Rate = 12.57 % yr<sup>-1</sup>; Perc Final = 129 % > increase

DECADAL: NO (2 yr)

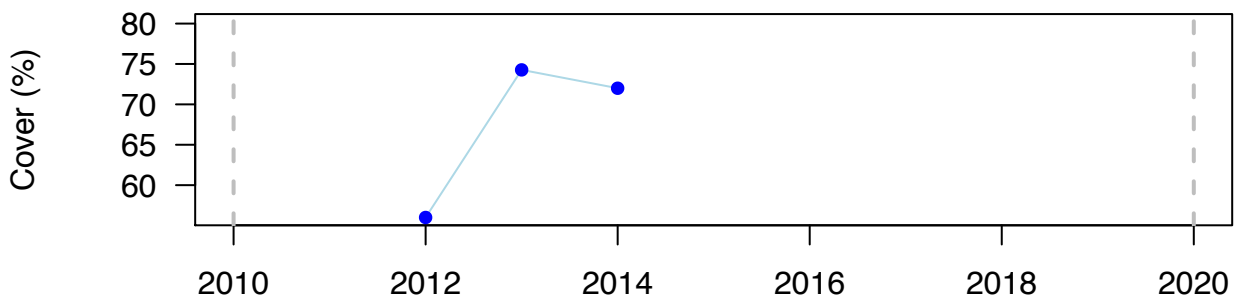

20\_cover

Marbà et al. 2015

SITE: Pozo de Esparto (POS\_03) (Spain – Mediterranean) – Po (-12.5 m)

OVERALL: Net = 7.47 %; Rate = 4.61 % yr<sup>-1</sup>; Perc Final = 110 % > no change

DECADAL: NO (2 yr)

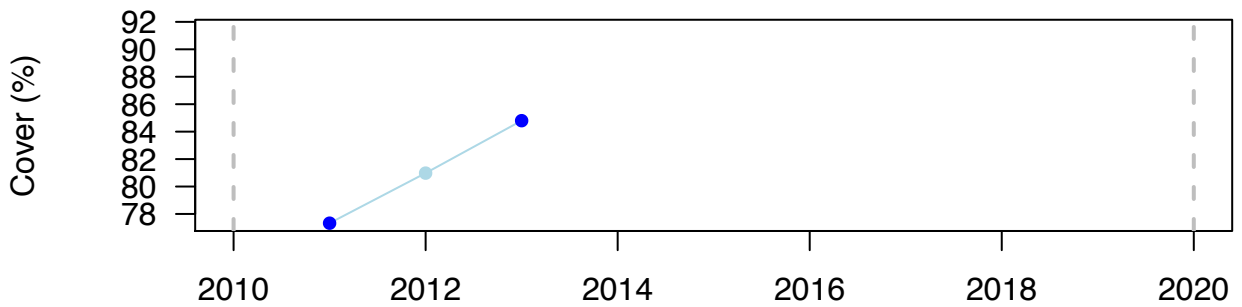

20\_density

Marbà et al. 2015

SITE: Pozo de Esparto (POS\_03) (Spain – Mediterranean) – Po (-12.5 m)

OVERALL: Net = -337.04 shoot m<sup>-2</sup>; Rate = -21.3 % yr<sup>-1</sup>; Perc Final = 53 % > decrease

DECADAL: NO (3 yr)

Shoot density (shoot m<sup>-2</sup>)

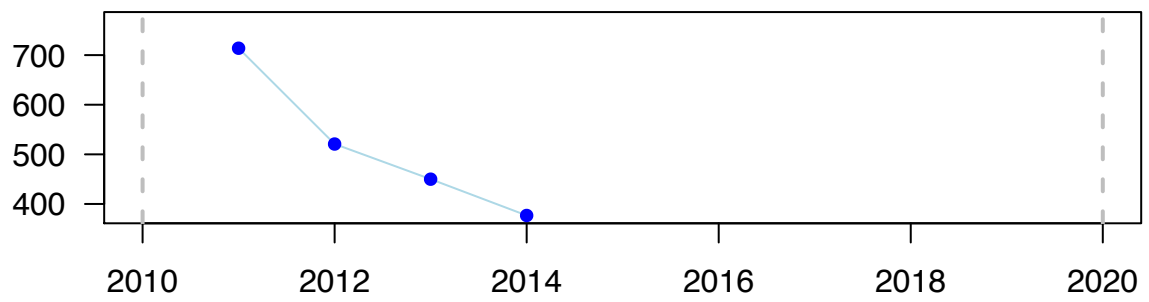

21\_cover

Marbà et al. 2015

SITE: El Calón (POS\_04) (Spain – Mediterranean) – Po (-12 m)

OVERALL: Net = -15.46 %; Rate = -6.66 % yr<sup>-1</sup>; Perc Final = 82 % > no change

DECADAL: NO (3 yr)

Cover (%)

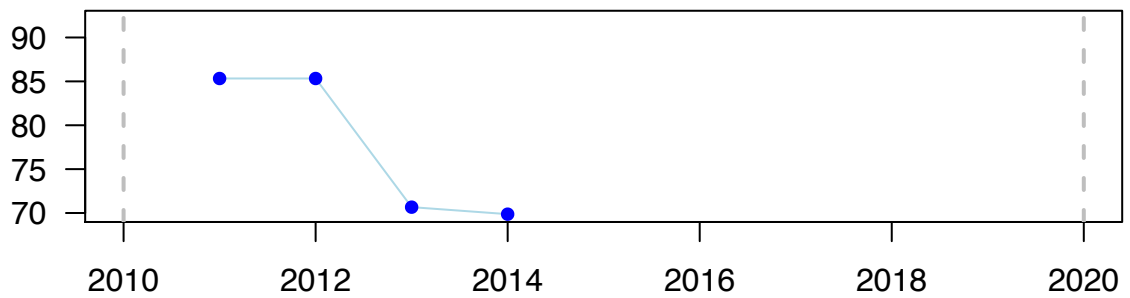

21\_density

Marbà et al. 2015

SITE: El Calón (POS\_04) (Spain – Mediterranean) – Po (-12 m)

OVERALL: Net = -59.37 shoot m<sup>-2</sup>; Rate = -3.47 % yr<sup>-1</sup>; Perc Final = 90 % > no change

DECADAL: NO (3 yr)

Shoot density (shoot m<sup>-2</sup>)

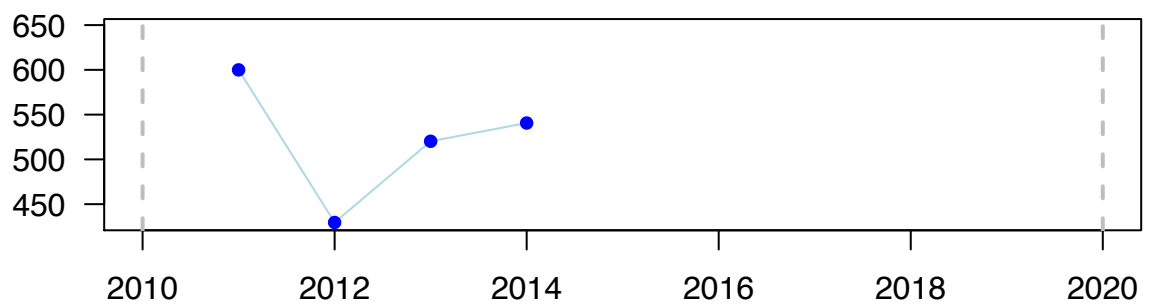

22\_cover

Marbà et al. 2015

SITE: Loza del Payo (POS\_05) (Spain – Mediterranean) – Po (-13 m)

OVERALL: Net = -11.07 %; Rate = -4.79 % yr<sup>-1</sup>; Perc Final = 87 % > no change

DECADAL: NO (3 yr)

Cover (%)

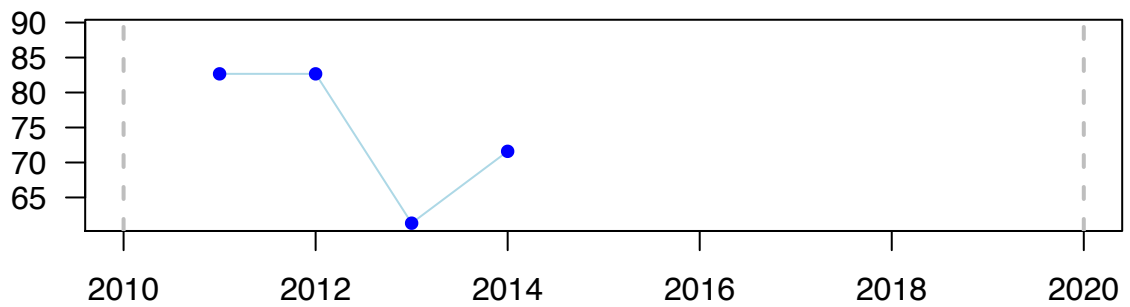

22\_density

Marbà et al. 2015

SITE: Loza del Payo (POS\_05) (Spain – Mediterranean) – Po (-13 m)

OVERALL: Net = 76.79 shoot m<sup>-2</sup>; Rate = 4.76 % yr<sup>-1</sup>; Perc Final = 115 % > no change

DECADAL: NO (3 yr)

Shoot density (shoot m<sup>-2</sup>)

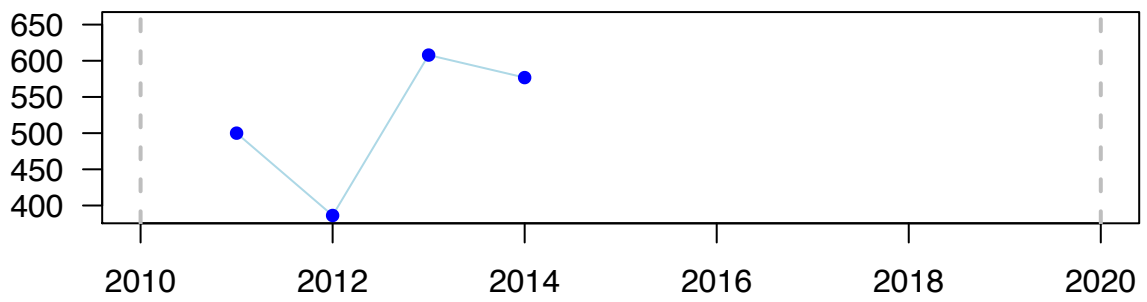

23\_cover

Marbà et al. 2015

SITE: Deretil (POS\_06) (Spain – Mediterranean) – Po (-12 m)

OVERALL: Net = 0.74 %; Rate = 1.37 % yr<sup>-1</sup>; Perc Final = 103 % > no change

DECADAL: NO (2 yr)

Cover (%)

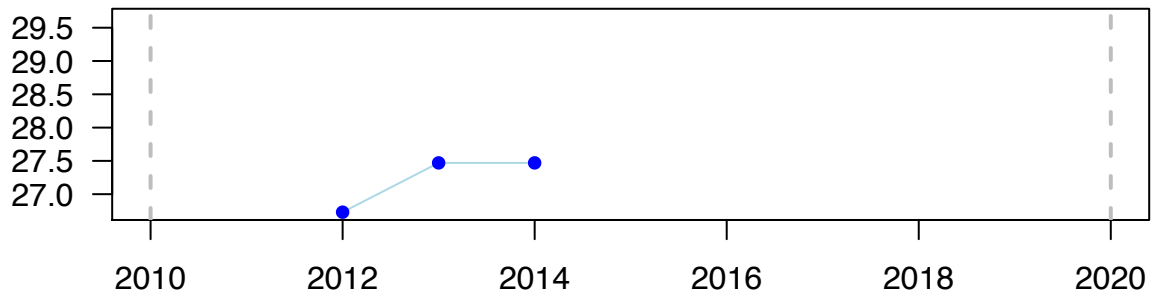

23\_density

Marbà et al. 2015

SITE: Deretil (POS\_06) (Spain – Mediterranean) – Po (–12 m)

OVERALL: Net = –95.59 shoot m<sup>-2</sup>; Rate = –18.95 % yr<sup>-1</sup>; Perc Final = 68 % > decrease

DECADAL: NO (2 yr)

Shoot density (shoot m<sup>-2</sup>)

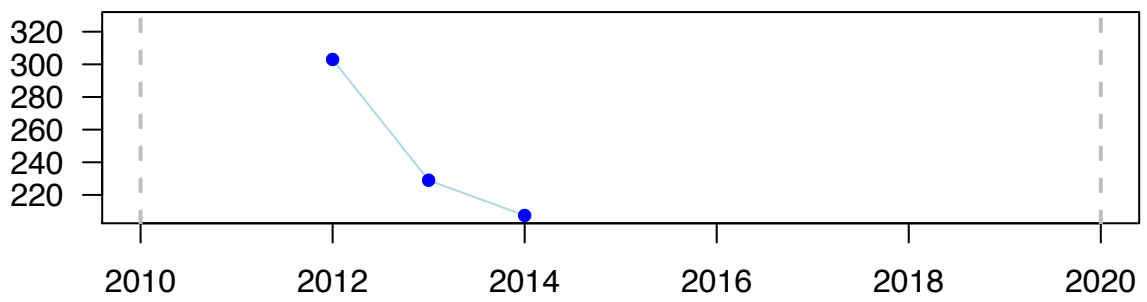

24\_cover

Marbà et al. 2015

SITE: Isla de San Andrés (POS\_07) (Spain – Mediterranean) – Po (–12 m)

OVERALL: Net = –5.33 %; Rate = –5.06 % yr<sup>-1</sup>; Perc Final = 90 % > no change

DECADAL: NO (2 yr)

Cover (%)

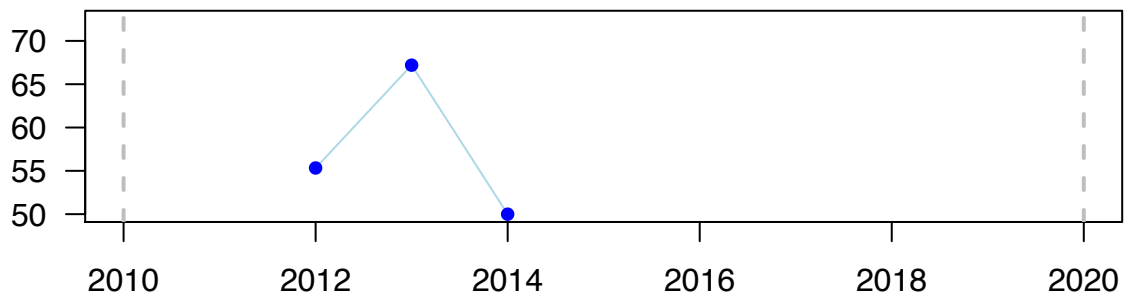



24\_density

Marbà et al. 2015

SITE: Isla de San Andrés (POS\_07) (Spain – Mediterranean) – Po (-12 m)

OVERALL: Net = -226.03 shoot m<sup>-2</sup>; Rate = -16.8 % yr<sup>-1</sup>; Perc Final = 71 % > decrease

DECADAL: NO (2 yr)

Shoot density (shoot m<sup>-2</sup>)

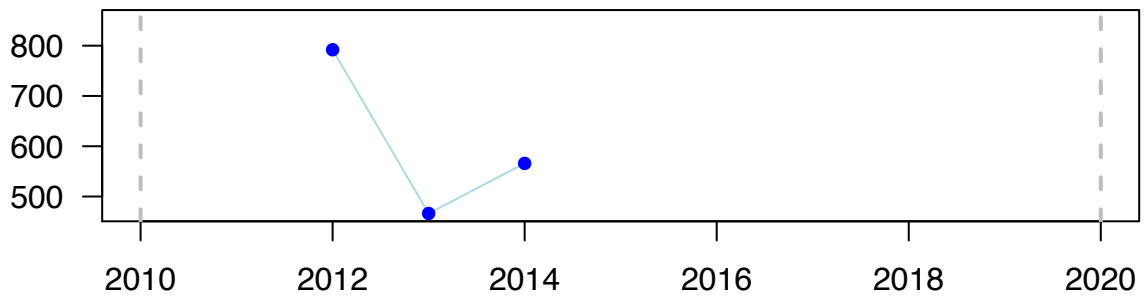

25\_biomass

Boström et al. 2002

SITE: Hangö Peninsula (dense) (Finland – Baltic) – Zm (-4 m)

OVERALL: Net = 8.4 g dw m<sup>-2</sup>; Rate = 1.85 % yr<sup>-1</sup>; Perc Final = 159 % > increase

DECADAL: YES (25 yr)

Total biomass (g dw m<sup>-2</sup>)

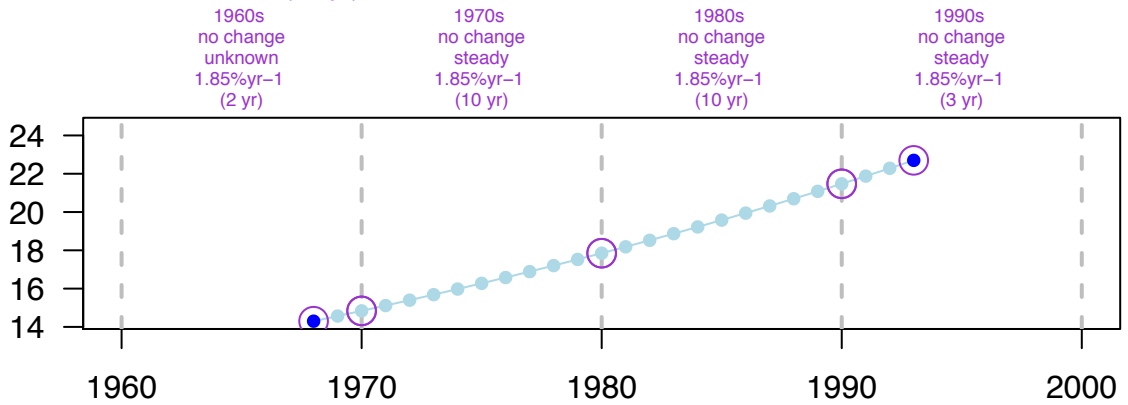

26\_biomass

Boström et al. 2002

SITE: Hangö Peninsula (sparce) (Finland – Baltic) – Zm (-4 m)

OVERALL: Net = 2.8 g dw m<sup>-2</sup>; Rate = 3.75 % yr<sup>-1</sup>; Perc Final = 256 % > increase

DECADAL: YES (25 yr)

Total biomass (g dw m<sup>-2</sup>)

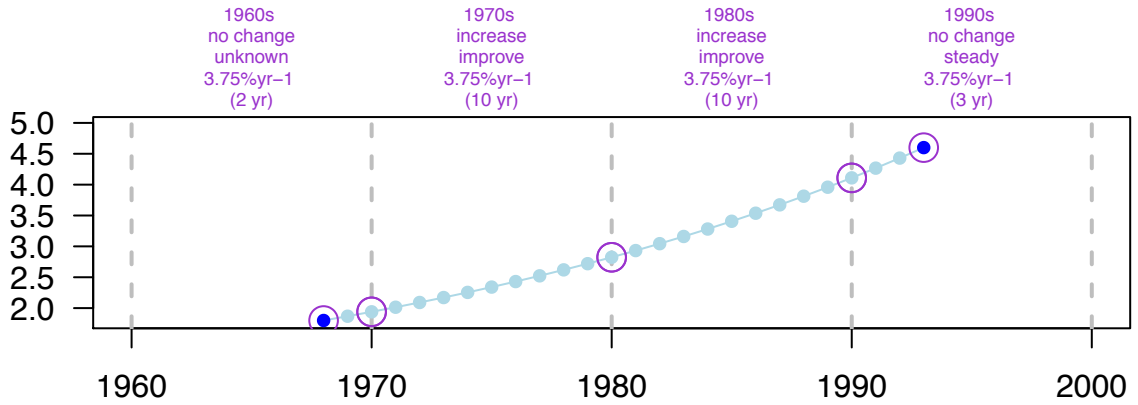

26\_density

Boström et al. 2002

SITE: Hangö Peninsula (sparce) (Finland – Baltic) – Zm (-4 m)

OVERALL: Net = 11 shoot m<sup>-2</sup>; Rate = 4.17 % yr<sup>-1</sup>; Perc Final = 283 % > increase

DECADAL: YES (25 yr)

Shoot density (shoot m<sup>-2</sup>)

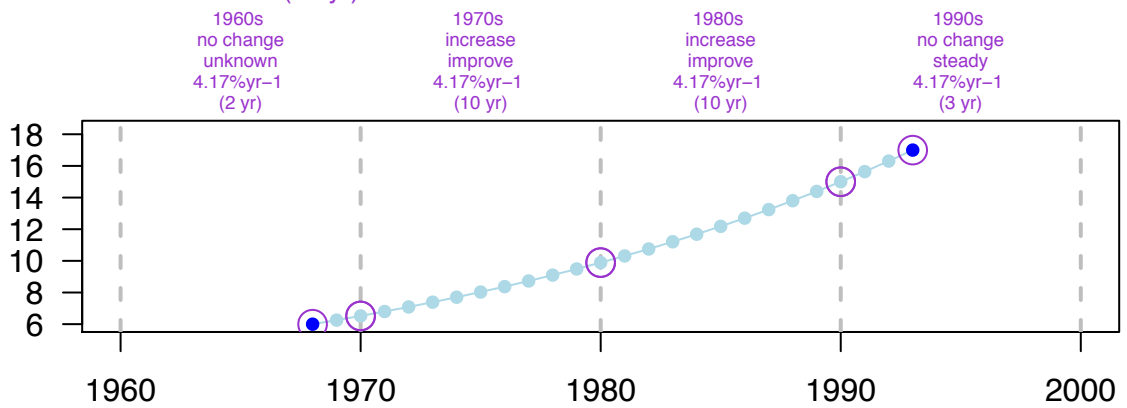

27\_area

Bull et al. 2010

SITE: Gibraltar (United Kingdom – Mediterranean) – Zm (? m)

OVERALL: Net = -121.05 ha; Rate = NA % yr<sup>-1</sup>; Perc Final = NA % > decrease

DECADAL: YES (15 yr)

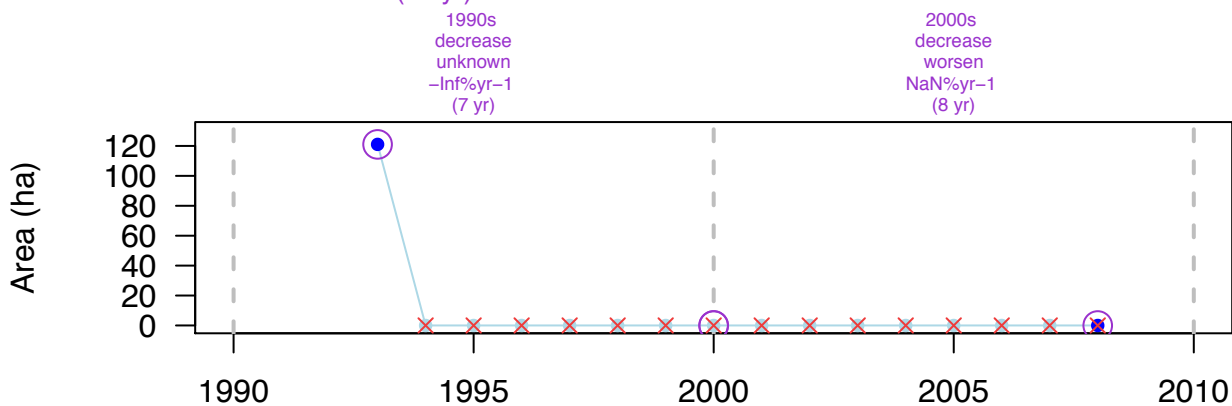

28\_area

Bull et al. 2010

SITE: Gibraltar (United Kingdom – Mediterranean) – Po (? m)

OVERALL: Net = -152.41 ha; Rate = NA % yr<sup>-1</sup>; Perc Final = NA % > decrease

DECADAL: YES (15 yr)

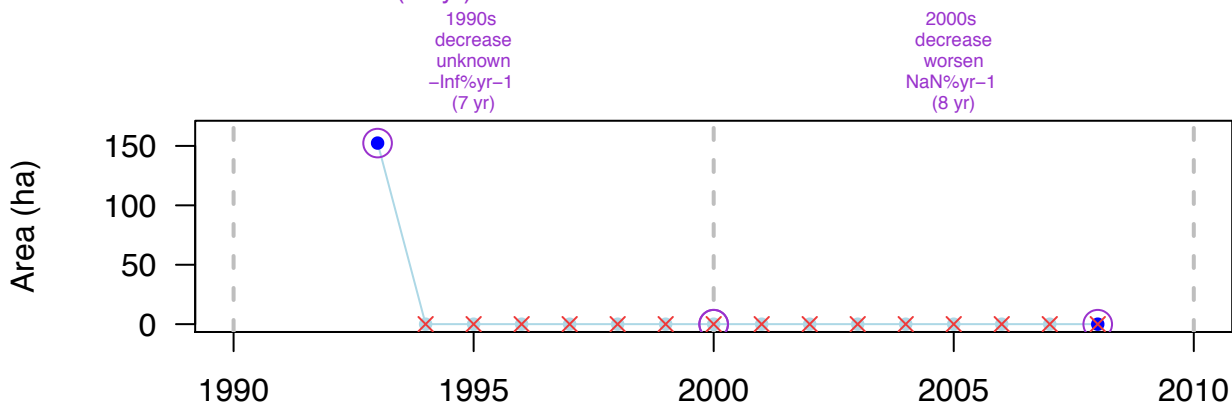

29\_density

Bull et al. 2012

SITE: Broad Ledges (United Kingdom – Atlantic) – Zm (-0.2 m)

OVERALL: Net = -13.3 shoot m<sup>-2</sup>; Rate = -1.32 % yr<sup>-1</sup>; Perc Final = 84 % > no change

DECADAL: YES (13 yr)

Shoot density (shoot m<sup>-2</sup>)

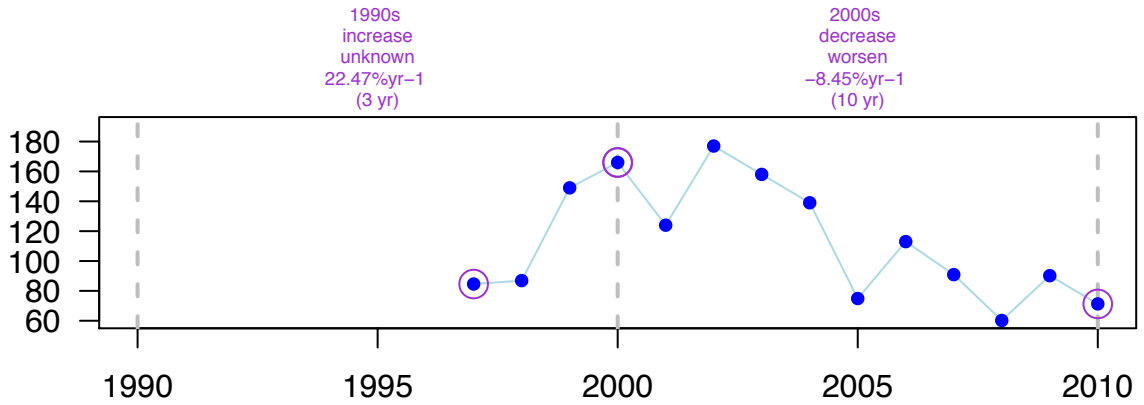

30\_density

Bull et al. 2012

SITE: Higher Town Bay (United Kingdom – Atlantic) – Zm (0.5 m)

OVERALL: Net = -27 shoot m<sup>-2</sup>; Rate = -1.24 % yr<sup>-1</sup>; Perc Final = 85 % > no change

DECADAL: YES (13 yr)

Shoot density (shoot m<sup>-2</sup>)

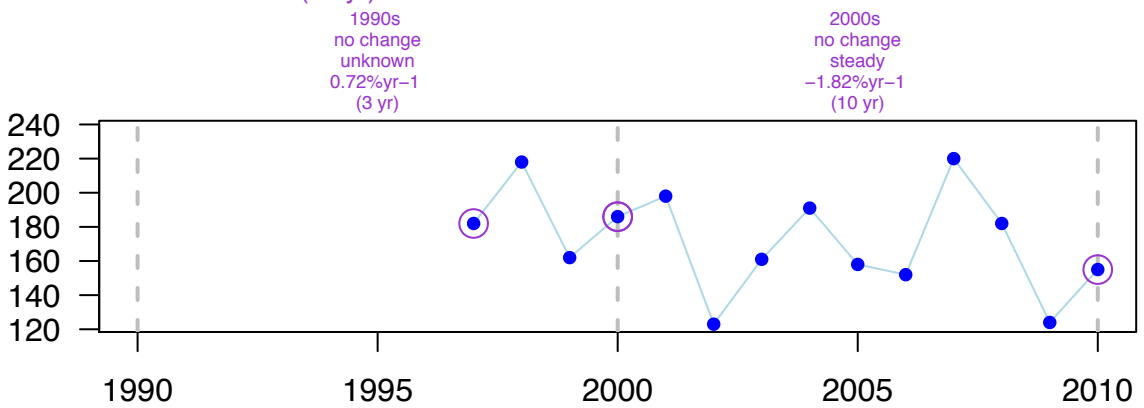

31\_density

Bull et al. 2012

SITE: Little Arthur (United Kingdom – Atlantic) – Zm (-1 m)

OVERALL: Net = 33 shoot m<sup>-2</sup>; Rate = 1.87 % yr<sup>-1</sup>; Perc Final = 125 % > increase

DECADAL: YES (12 yr)

Shoot density (shoot m<sup>-2</sup>)

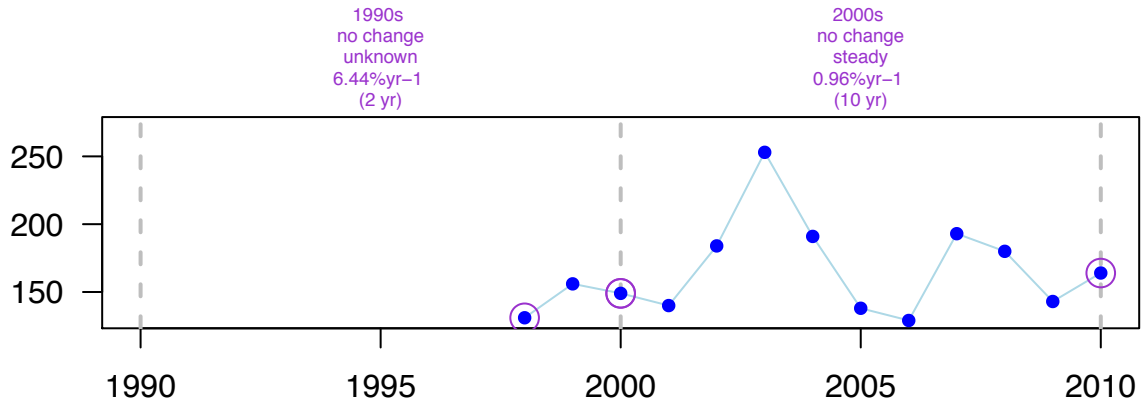

32\_density

Bull et al. 2012

SITE: Old Grimsby Harbour (United Kingdom – Atlantic) – Zm (-0.6 m)

OVERALL: Net = -10 shoot m<sup>-2</sup>; Rate = -0.68 % yr<sup>-1</sup>; Perc Final = 92 % > no change

DECADAL: YES (13 yr)

Shoot density (shoot m<sup>-2</sup>)

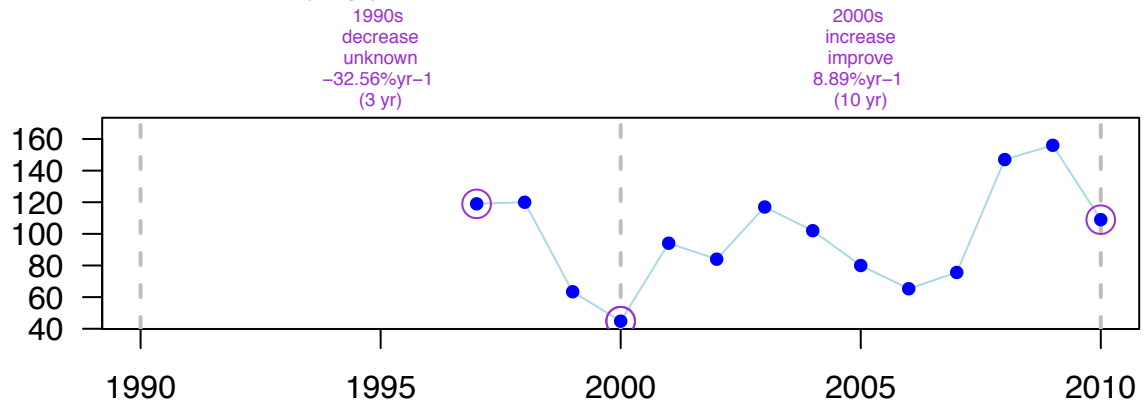

33\_density

Bull et al. 2012

SITE: West Broad Ledges (United Kingdom – Atlantic) – Zm (–0.6 m)

OVERALL: Net = –15 shoot m<sup>-2</sup>; Rate = –0.91 % yr<sup>-1</sup>; Perc Final = 89 % > no change

DECADAL: YES (13 yr)

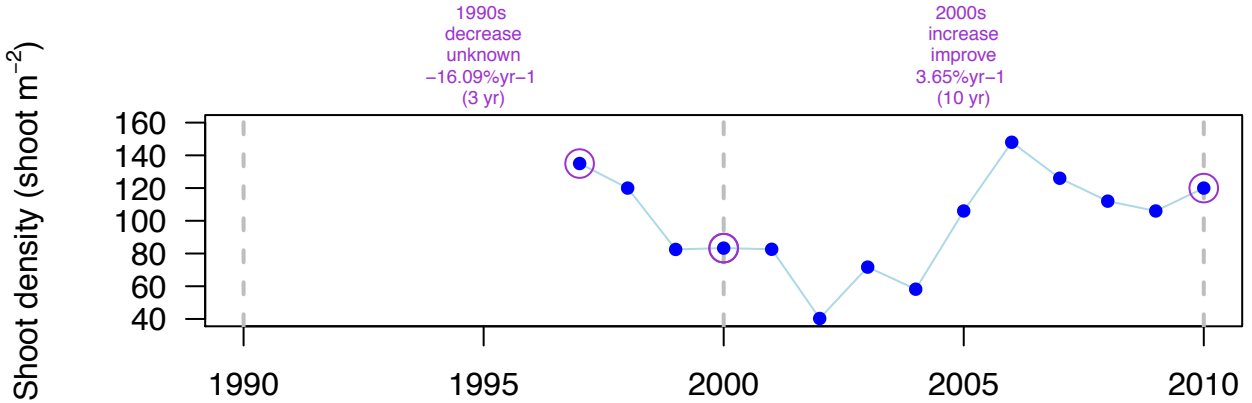

34\_area

Burton et al. 2010

SITE: North Haven (Skomer) (United Kingdom – Atlantic) – Zm (? m)

OVERALL: Net = 0.25 ha; Rate = 1.34 % yr<sup>-1</sup>; Perc Final = 145 % > increase

DECADAL: YES (28 yr)

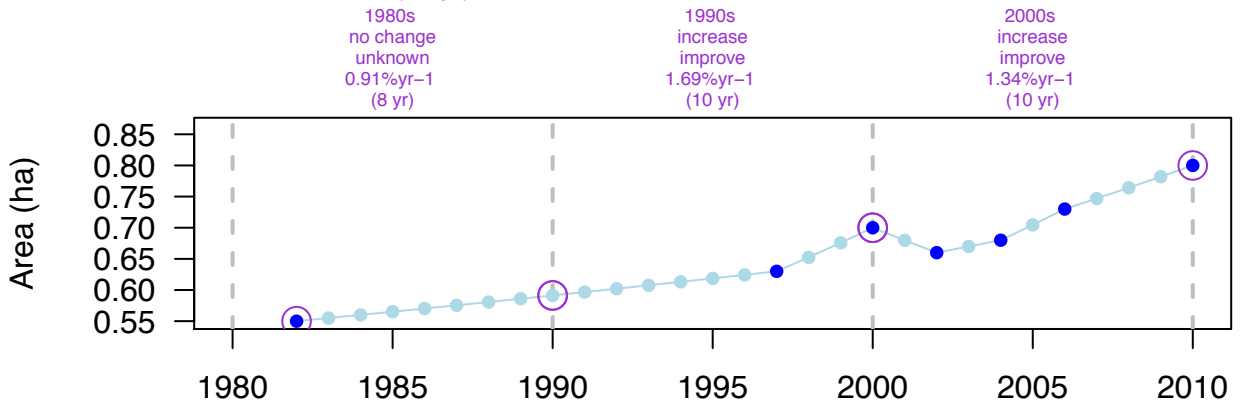

34\_density

Burton et al. 2010

SITE: North Haven (Skomer) (United Kingdom – Atlantic) – Zm (? m)

OVERALL: Net = 4.2 shoot m<sup>-2</sup>; Rate = 0.84 % yr<sup>-1</sup>; Perc Final = 112 % > no change

DECADAL: YES (13 yr)

Shoot density (shoot m<sup>-2</sup>)

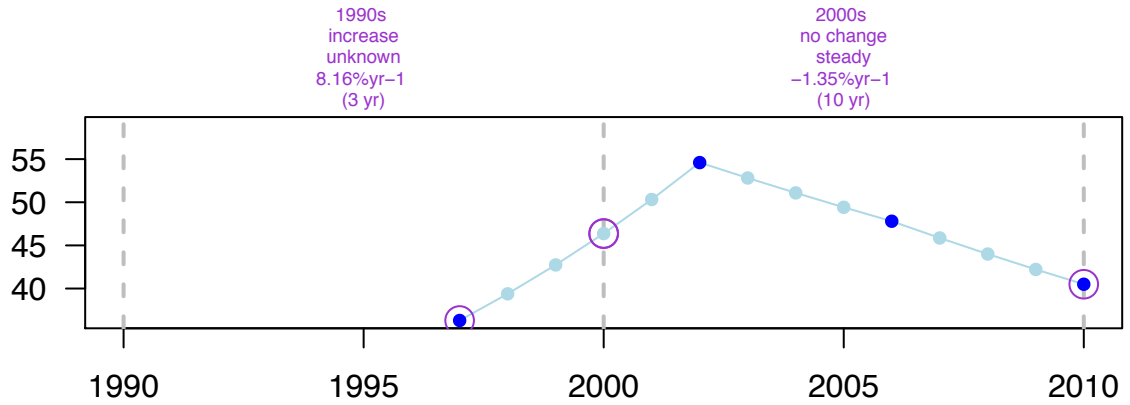

35\_area

Rismondo and Mion 2008

SITE: Venice Lagoon (Italy – Mediterranean) – Zm (-1 m)

OVERALL: Net = -840 ha; Rate = -37.43 % yr<sup>-1</sup>; Perc Final = 47 % > decrease

DECADAL: NO (2 yr)

Area (ha)

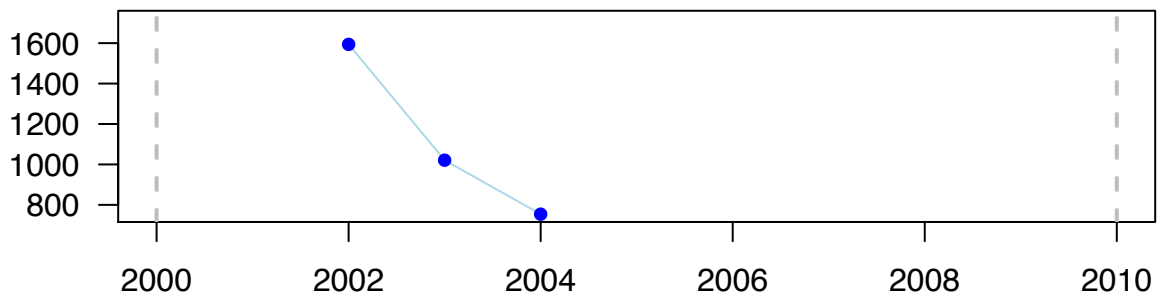

37\_lowerlimit

Rask et al. 1999

SITE: South Funen Archipelago (Denmark – Baltic) – Zm (? m)

OVERALL: Net = 1.5 m; Rate = 1.31 % yr<sup>-1</sup>; Perc Final = 125 % > increase

DECADAL: YES (17 yr)

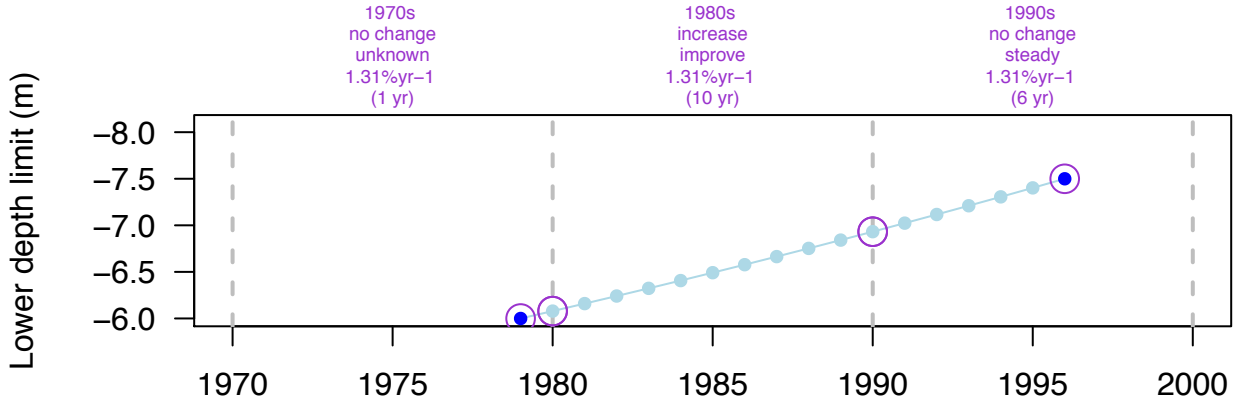

45\_biomass

Plus et al. 2003

SITE: Thau Lagoon (France – Mediterranean) – Zm (-4.2 m)

OVERALL: Net = 29.8 g dw m<sup>-2</sup>; Rate = NA % yr<sup>-1</sup>; Perc Final = NA % > increase

DECADAL: NO (2 yr)

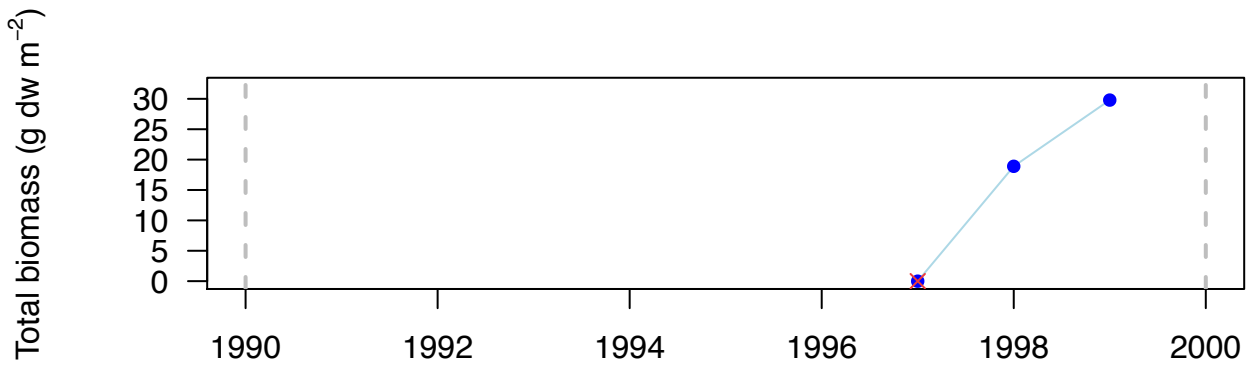



45\_density

Plus et al. 2003

SITE: Thau Lagoon (France – Mediterranean) – Zm (-4.2 m)

OVERALL: Net = 107.41 shoot m<sup>-2</sup>; Rate = NA % yr<sup>-1</sup>; Perc Final = NA % > increase

DECADAL: NO (2 yr)

Shoot density (shoot m<sup>-2</sup>)

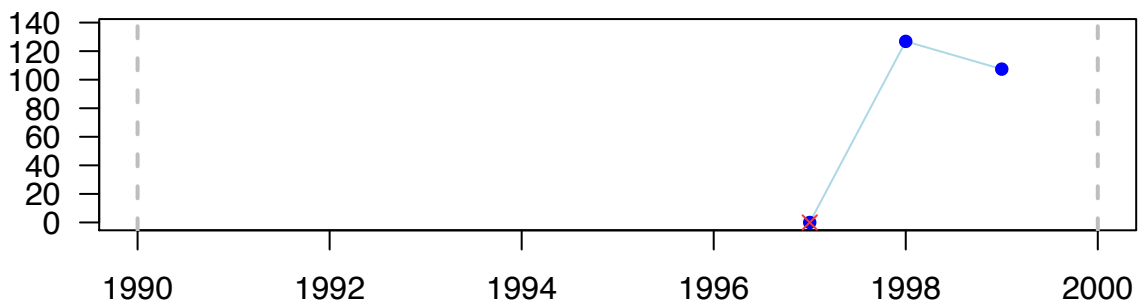

46\_area

Ballesta et al. 2000

SITE: Pin Parasol Cove (France – Mediterranean) – Po (? m)

OVERALL: Net = -0.01 ha; Rate = -8.66 % yr<sup>-1</sup>; Perc Final = 50 % > decrease

DECADAL: YES (8 yr)

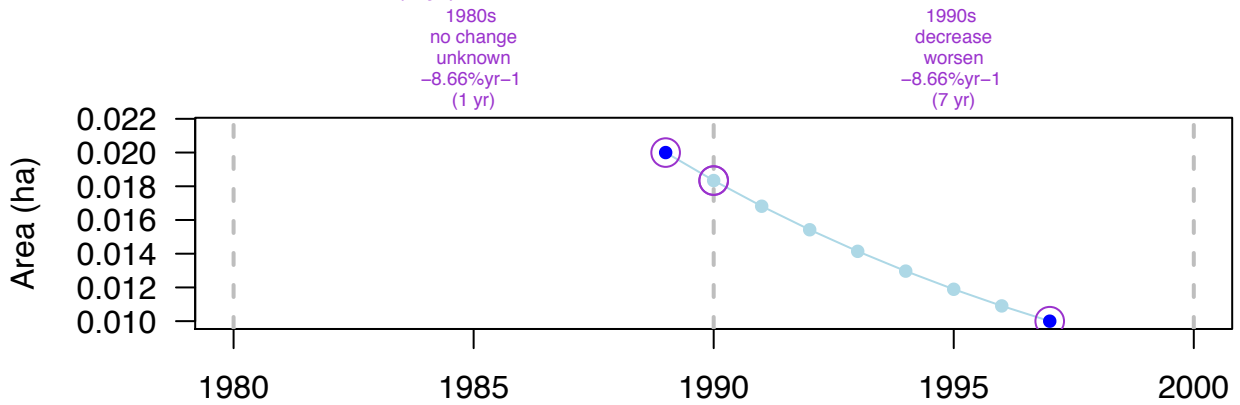

47\_area

Rismondo and Mion 2008

SITE: Venice Lagoon (Italy – Mediterranean) – Cn (? m)

OVERALL: Net = -82 ha; Rate = -41.68 % yr<sup>-1</sup>; Perc Final = 43 % > decrease

DECADAL: NO (2 yr)

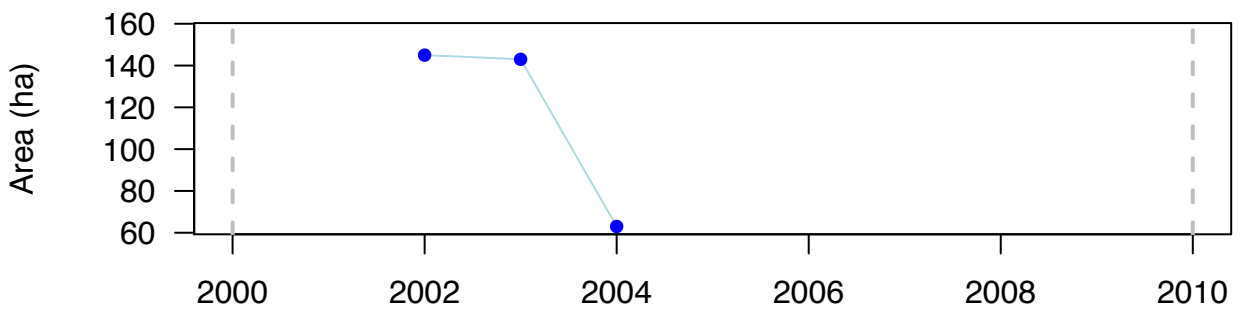

48\_area

Charpentier et al. 2005

SITE: Vaccarès Lagoon (France – Mediterranean) – Zn (? m)

OVERALL: Net = -869.5 ha; Rate = -2.02 % yr<sup>-1</sup>; Perc Final = 82 % > decrease

DECADAL: YES (10 yr)

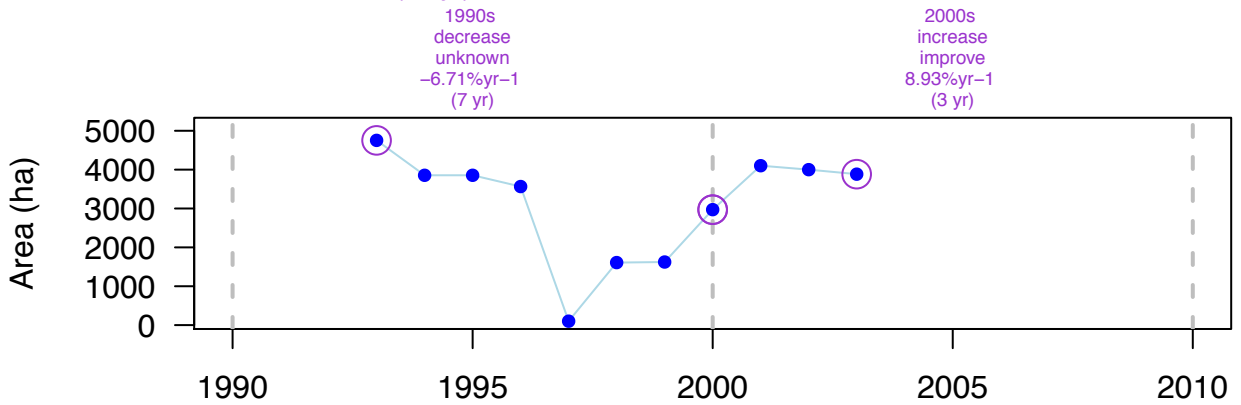

48\_lowerlimit

Charpentier et al. 2005

SITE: Vaccarès Lagoon (France – Mediterranean) – Zn (? m)

OVERALL: Net = 0.14 m; Rate = 1.17 % yr<sup>-1</sup>; Perc Final = 109 % > no change

DECADAL: NO (7 yr)

Lower depth limit (m)

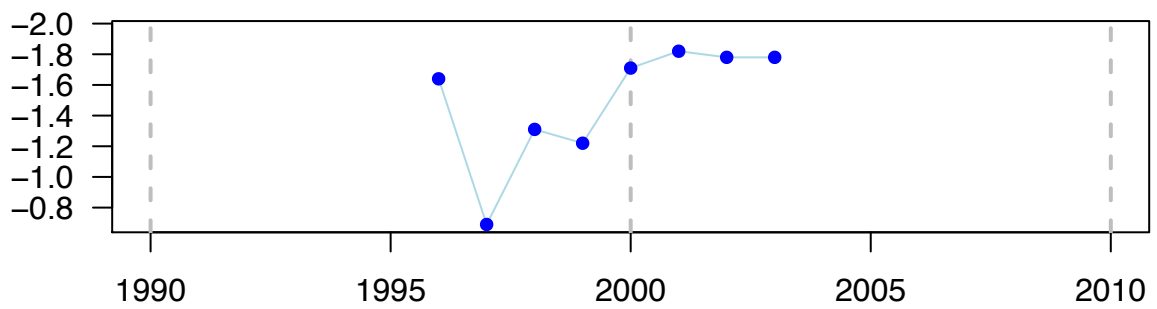

49\_area

Nyqvist et al. 2009, Baden et al. 2003

SITE: Kungälv (Sweden – Baltic) – Zm (? m)

OVERALL: Net = -557.03 ha; Rate = -8.08 % yr<sup>-1</sup>; Perc Final = 14 % > decrease

DECADAL: YES (24 yr)

Area (ha)

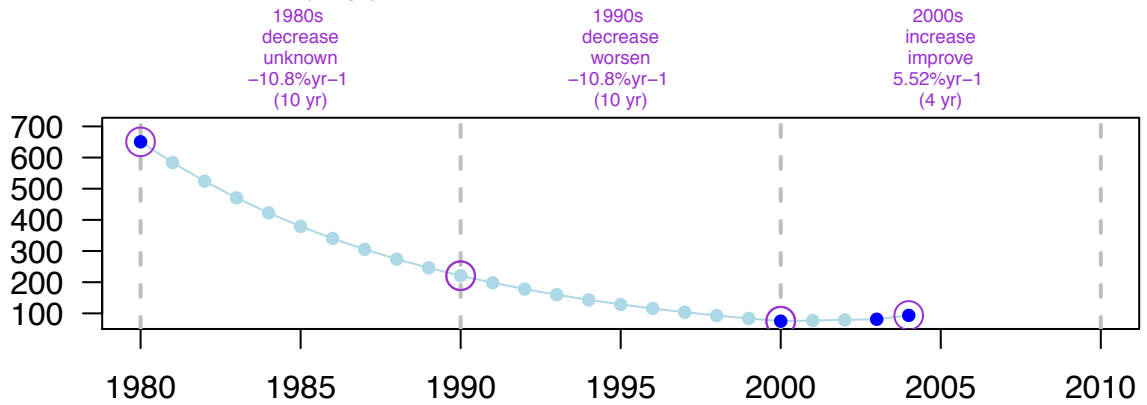

50\_area

Nyqvist et al. 2009

SITE: Lysekil (Sweden – Baltic) – Zm (? m)

OVERALL: Net = -27.1 ha; Rate = -0.86 % yr<sup>-1</sup>; Perc Final = 81 % > decrease

DECADAL: YES (24 yr)

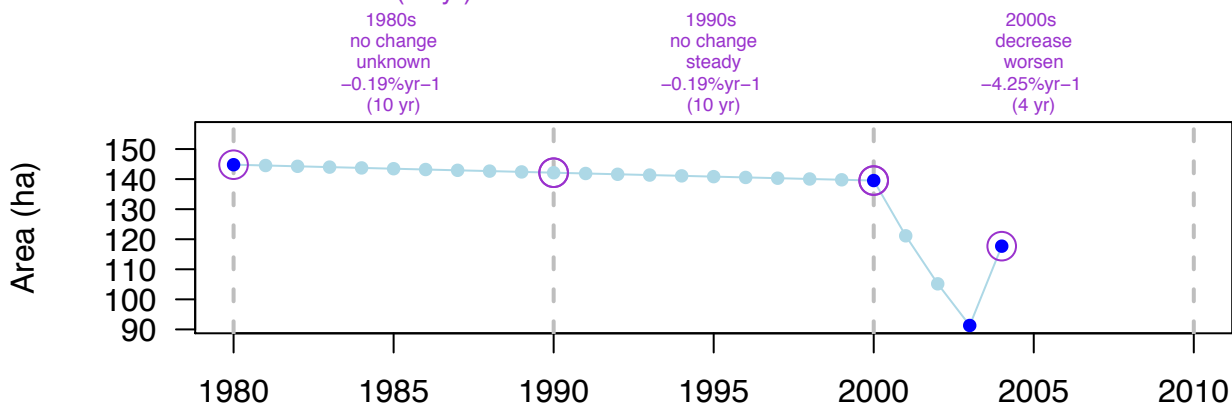

51\_area

Nyqvist et al. 2009

SITE: Stenungsund (Sweden – Baltic) – Zm (? m)

OVERALL: Net = -50.71 ha; Rate = -0.79 % yr<sup>-1</sup>; Perc Final = 83 % > decrease

DECADAL: YES (24 yr)

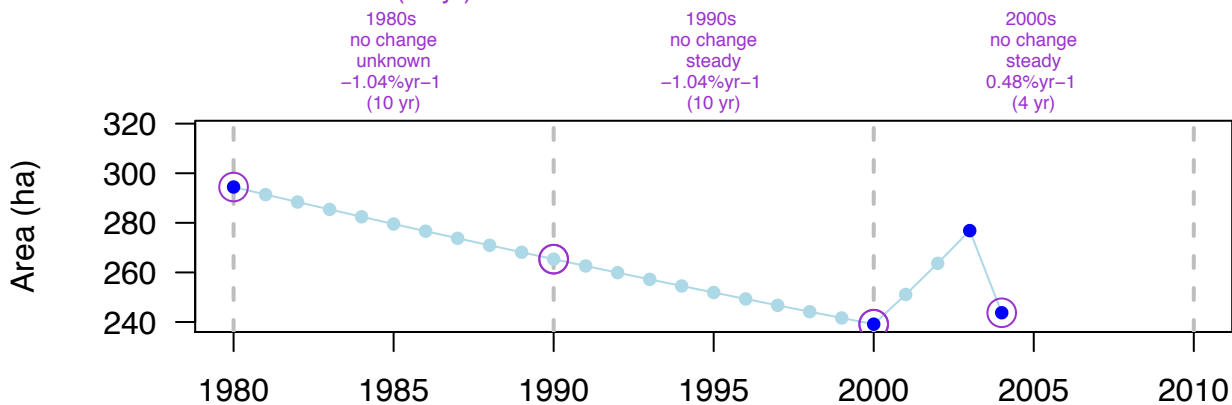

52\_area

Nyqvist et al. 2009

SITE: Strömstad (Sweden – Baltic) – Zm (? m)

OVERALL: Net = -72.81 ha; Rate = -2.01 % yr<sup>-1</sup>; Perc Final = 62 % > decrease

DECADAL: YES (24 yr)

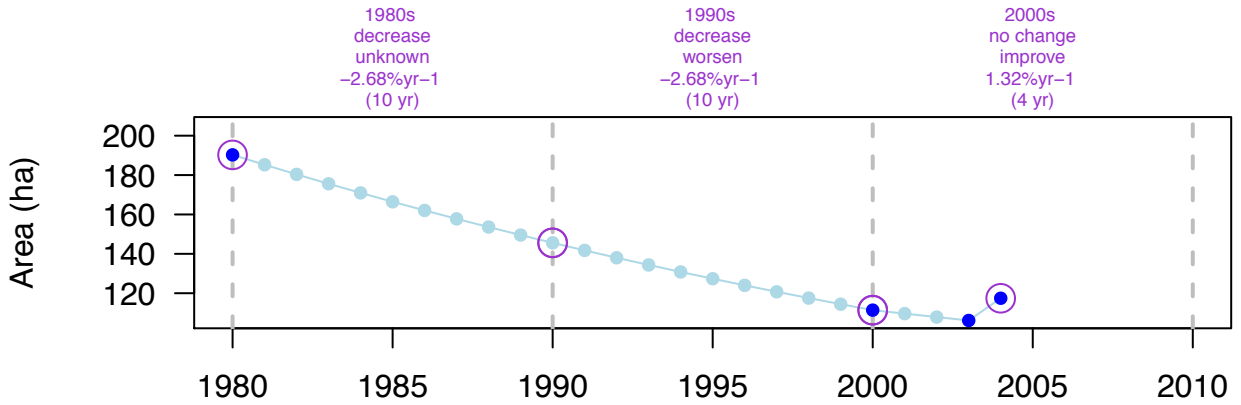

53\_area

Nyqvist et al. 2009

SITE: Uddevalla (Sweden – Baltic) – Zm (? m)

OVERALL: Net = -255.06 ha; Rate = -4.48 % yr<sup>-1</sup>; Perc Final = 34 % > decrease

DECADAL: YES (24 yr)

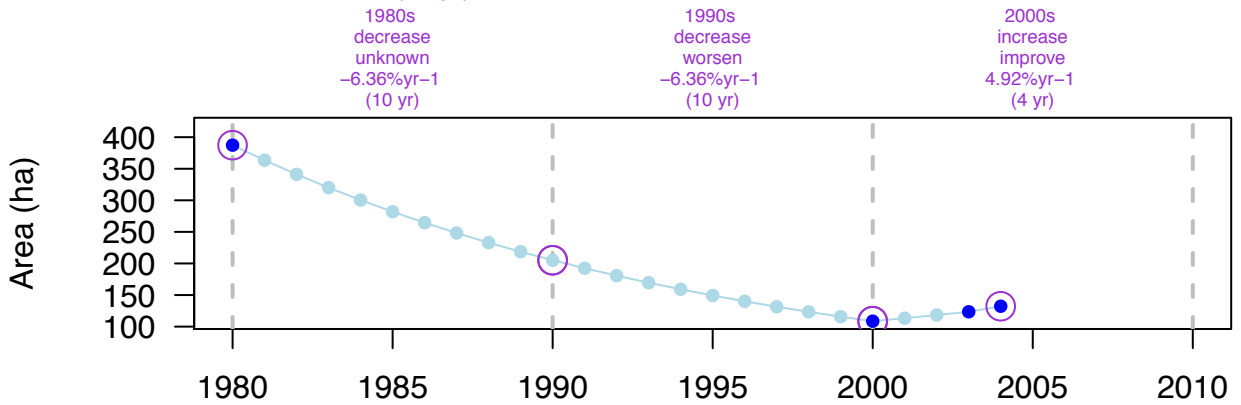

54\_area

Garrido et al. 2013

SITE: Urbino Lagoon (France – Mediterranean) – Cn (? m)

OVERALL: Net = -22 ha; Rate = -0.27 % yr<sup>-1</sup>; Perc Final = 90 % > no change

DECADAL: YES (38 yr)

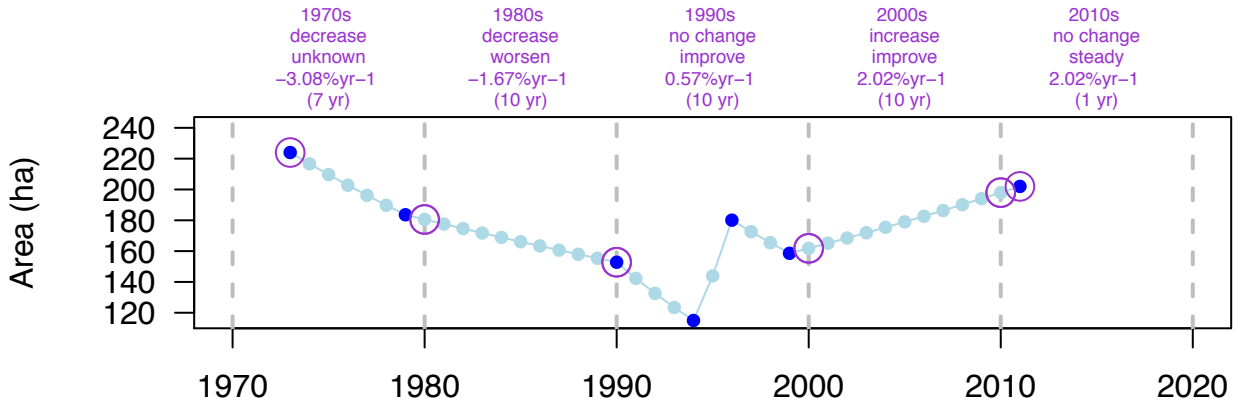

55\_area

Martínez-Samper et al. 2011

SITE: Bahía de Confital (Spain – Atlantic) – Cn (? m)

OVERALL: Net = -10.45 ha; Rate = NA % yr<sup>-1</sup>; Perc Final = NA % > decrease

DECADAL: YES (22 yr)

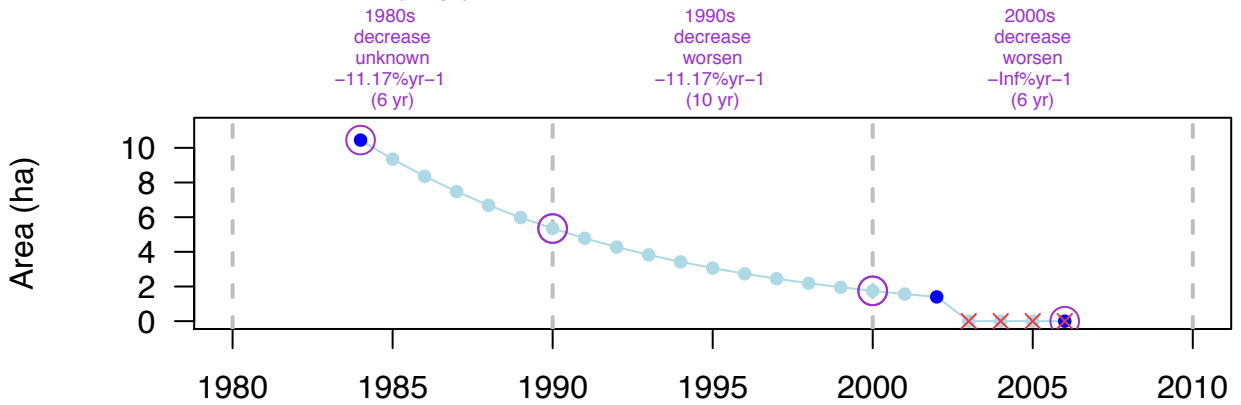

56\_area

Martinez-Samper et al. 2011

SITE: Franja Las Palmas de Gran Canaria (Spain – Atlantic) – Cn (-16 m)

OVERALL: Net = -11.89 ha; Rate = NA % yr<sup>-1</sup>; Perc Final = NA % > decrease

DECADAL: NO (5 yr)

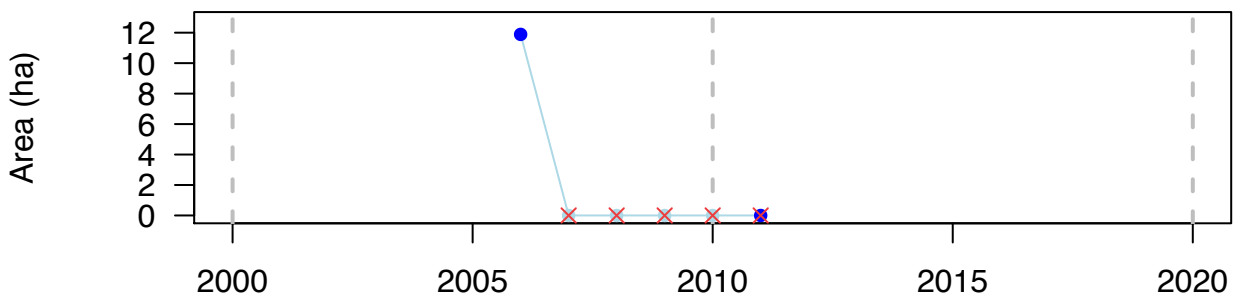

57\_area

Martinez-Samper et al. 2011

SITE: Franja Marina del Telde (Spain – Atlantic) – Cn (-11.7 m)

OVERALL: Net = -25.25 ha; Rate = -20.5 % yr<sup>-1</sup>; Perc Final = 0 % > decrease

DECADAL: YES (27 yr)

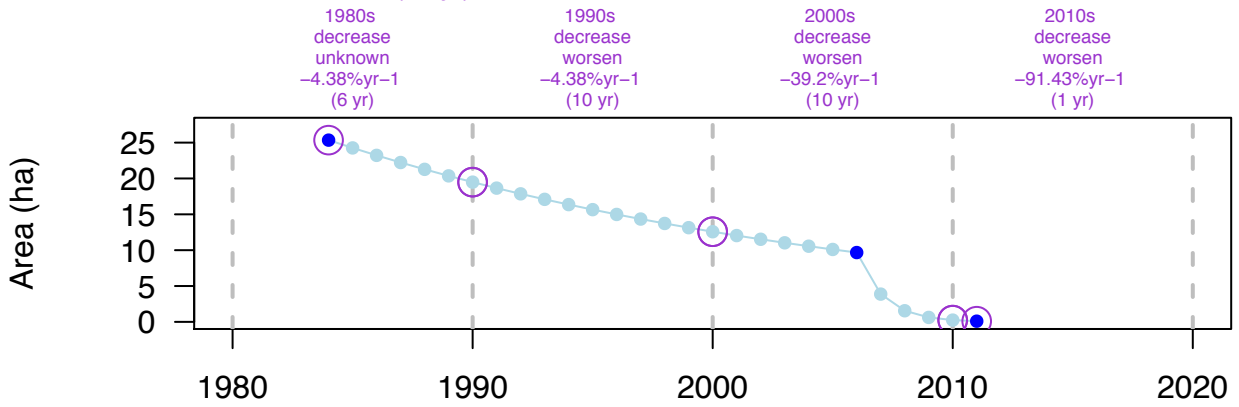

58\_area

Martinez-Samper et al. 2011

SITE: Bahía de Gando (Spain – Atlantic) – Cn (-7.2 m)

OVERALL: Net = -66.1 ha; Rate = NA % yr<sup>-1</sup>; Perc Final = NA % > decrease

DECADAL: YES (27 yr)

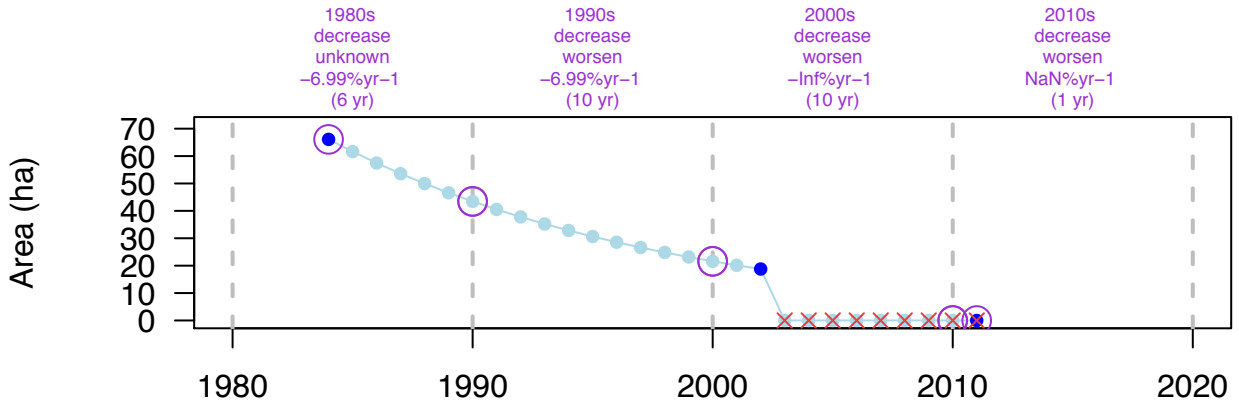

59\_area

Martinez-Samper et al. 2011

SITE: Playa de Vargas (Spain – Atlantic) – Cn (-12.9 m)

OVERALL: Net = -24.73 ha; Rate = -49.53 % yr<sup>-1</sup>; Perc Final = 1 % > decrease

DECADAL: YES (9 yr)

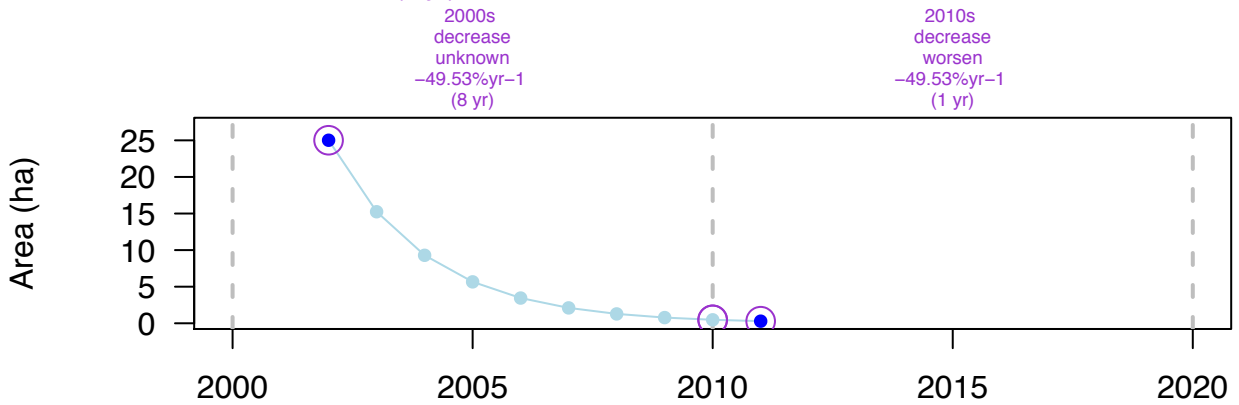



60\_area

Martinez-Samper et al. 2011

SITE: Playa del Cabrón (Spain – Atlantic) – Cn (-9 m)

OVERALL: Net = 0.19 ha; Rate = 0.08 % yr<sup>-1</sup>; Perc Final = 102 % > no change

DECADAL: YES (27 yr)

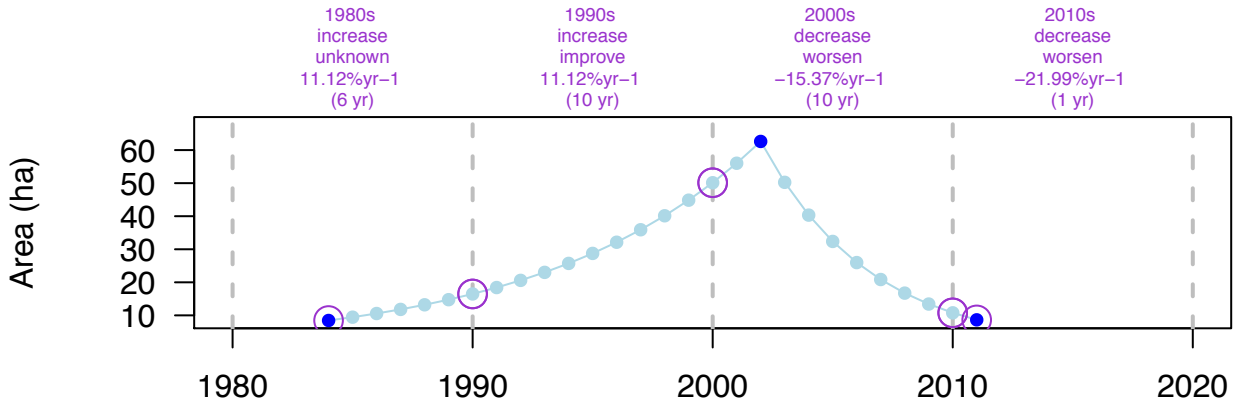

61\_area

Martinez-Samper et al. 2011

SITE: Arinaga (Spain – Atlantic) – Cn (-6.6 m)

OVERALL: Net = -66.4 ha; Rate = -20.4 % yr<sup>-1</sup>; Perc Final = 0 % > decrease

DECADAL: YES (27 yr)

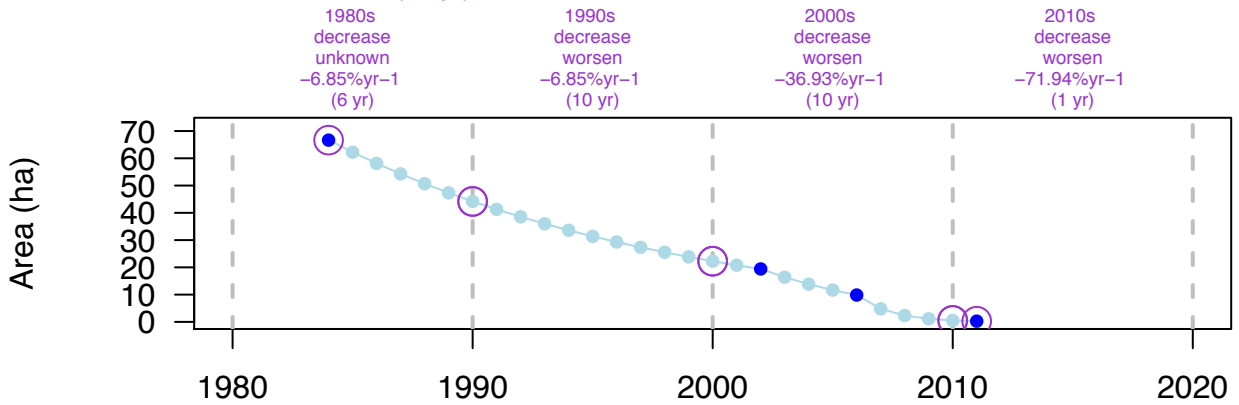

62\_area

Martinez-Samper et al. 2011

SITE: Juan Grande (Spain – Atlantic) – Cn (-11.3 m)

OVERALL: Net = -6.85 ha; Rate = -42 % yr<sup>-1</sup>; Perc Final = 2 % > decrease

DECADAL: YES (9 yr)

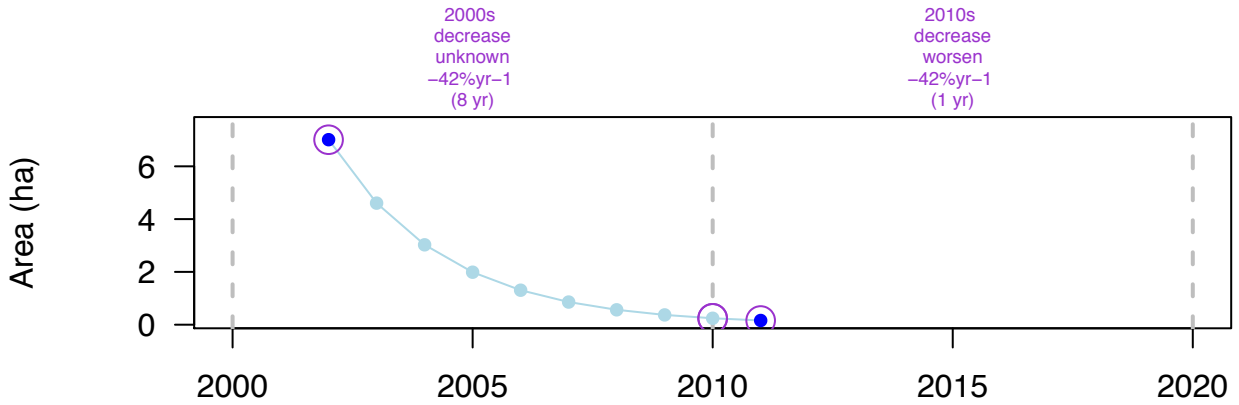

63\_area

Martinez-Samper et al. 2011

SITE: Juncalillo del Sur (Spain – Atlantic) – Cn (-6.8 m)

OVERALL: Net = -23.11 ha; Rate = -4.58 % yr<sup>-1</sup>; Perc Final = 66 % > decrease

DECADAL: YES (9 yr)

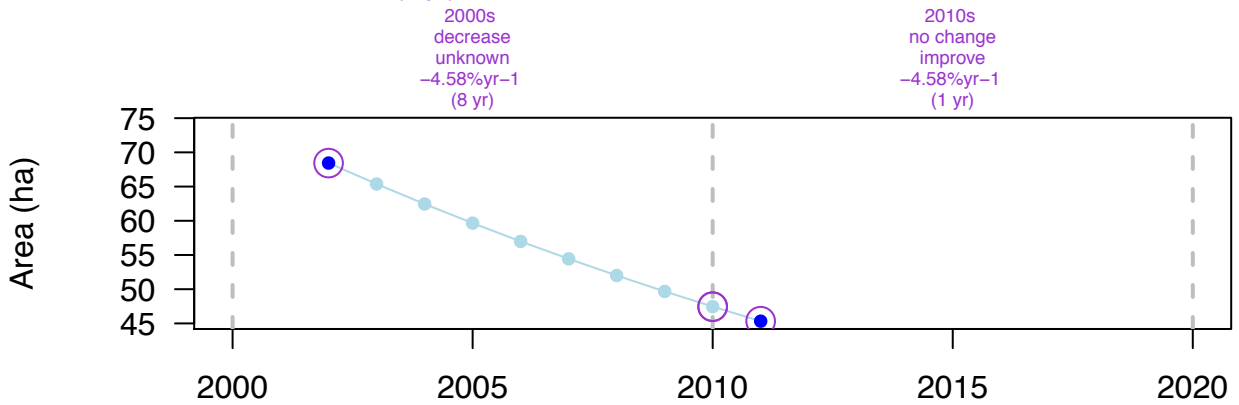

64\_area

Martínez-Samper et al. 2011

SITE: Playa del Inglés (Spain – Atlantic) – Cn (-5.3 m)

OVERALL: Net = -43.57 ha; Rate = -3.18 % yr<sup>-1</sup>; Perc Final = 42 % > decrease

DECADAL: YES (27 yr)

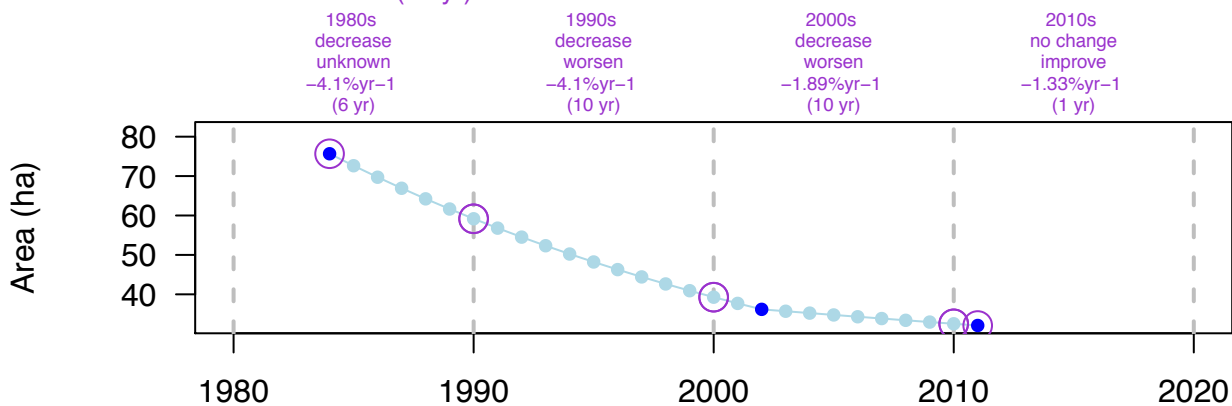

65\_area

Martínez-Samper et al. 2011

SITE: Bahía Feliz – San Agustín (Spain – Atlantic) – Cn (-4.6 m)

OVERALL: Net = 4.53 ha; Rate = 0.88 % yr<sup>-1</sup>; Perc Final = 127 % > increase

DECADAL: YES (27 yr)

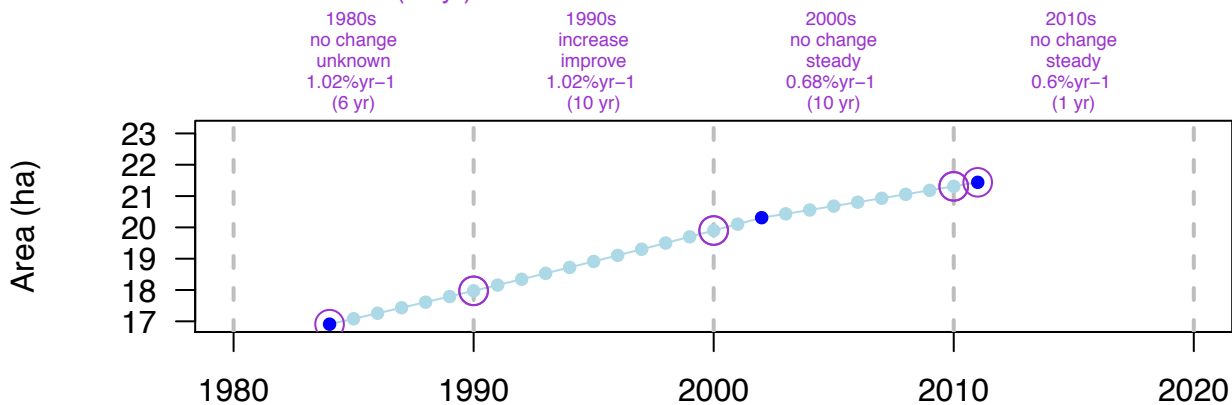

66\_area

Martinez-Samper et al. 2011

SITE: Franja Marina de Mogán (Spain – Atlantic) – Cn (-5.5 m)

OVERALL: Net = -50.67 ha; Rate = -2.13 % yr<sup>-1</sup>; Perc Final = 56 % > decrease

DECADAL: YES (27 yr)

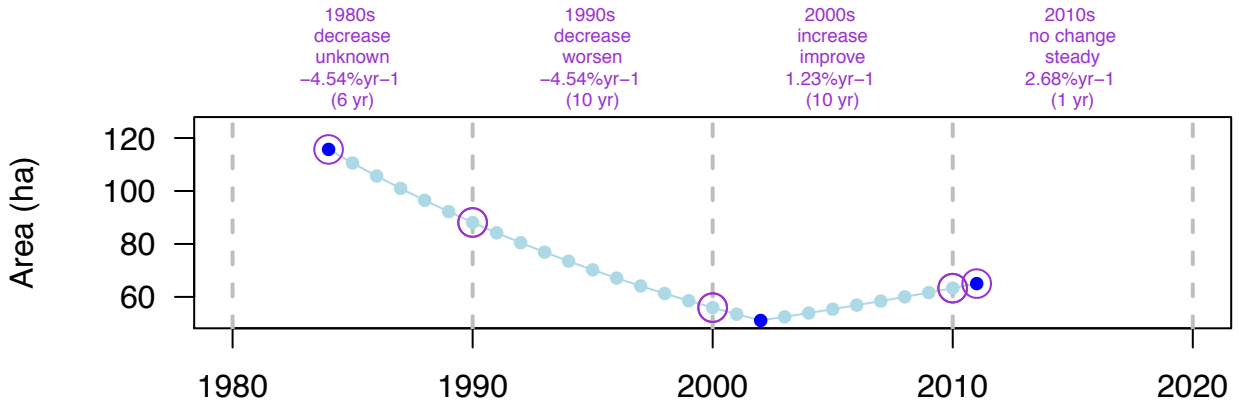

67\_area

Boudouresque et al. 2006

SITE: Mourillion (France – Mediterranean) – Po (? m)

OVERALL: Net = -69 ha; Rate = -4.22 % yr<sup>-1</sup>; Perc Final = 53 % > decrease

DECADAL: YES (15 yr)

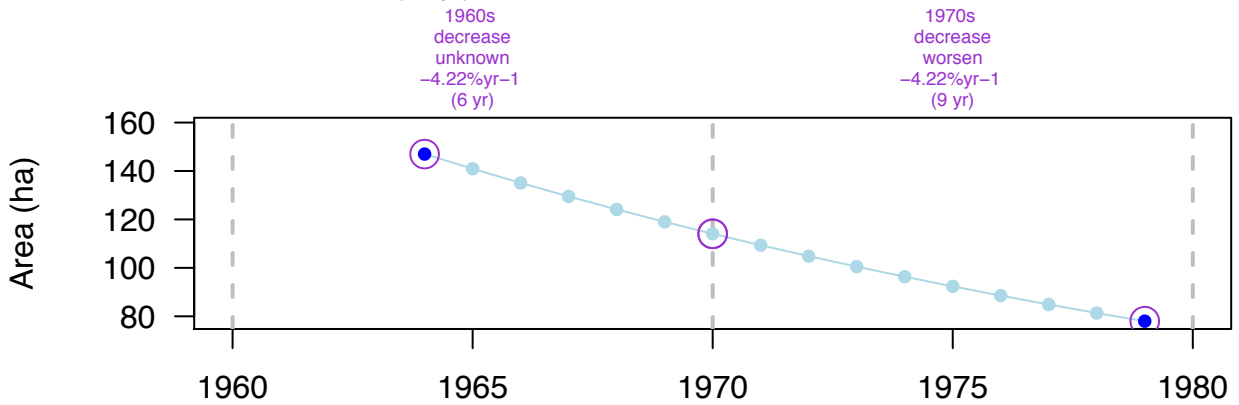

68\_area

Philippart and Dijkema 1995

SITE: De Keeg – De Ans (The Netherlands – Atlantic) – Zn (? m)

OVERALL: Net = 8 ha; Rate = 2.67 % yr<sup>-1</sup>; Perc Final = 153 % > increase

DECADAL: YES (16 yr)

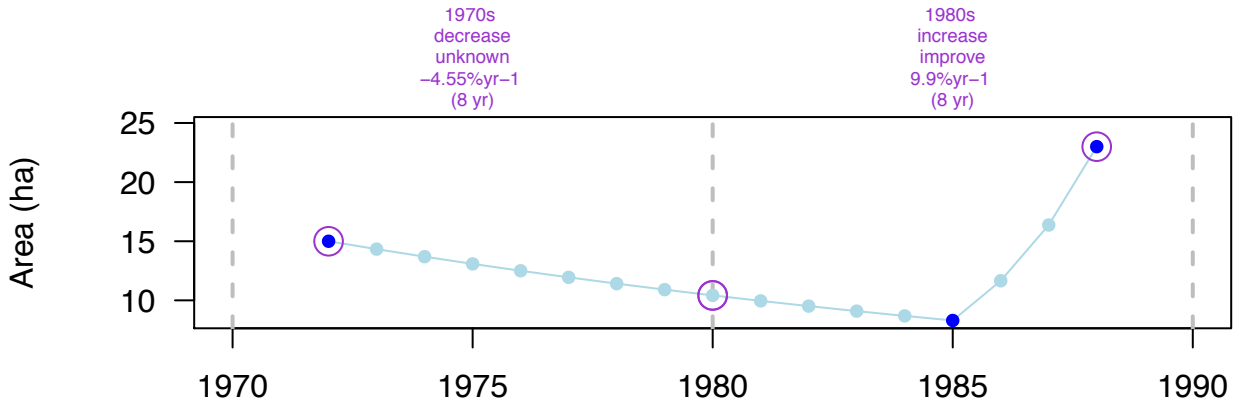

69\_area

Philippart and Dijkema 1995

SITE: Emmapolder (The Netherlands – Atlantic) – Zn (? m)

OVERALL: Net = 77 ha; Rate = NA % yr<sup>-1</sup>; Perc Final = NA % > increase

DECADAL: YES (15 yr)

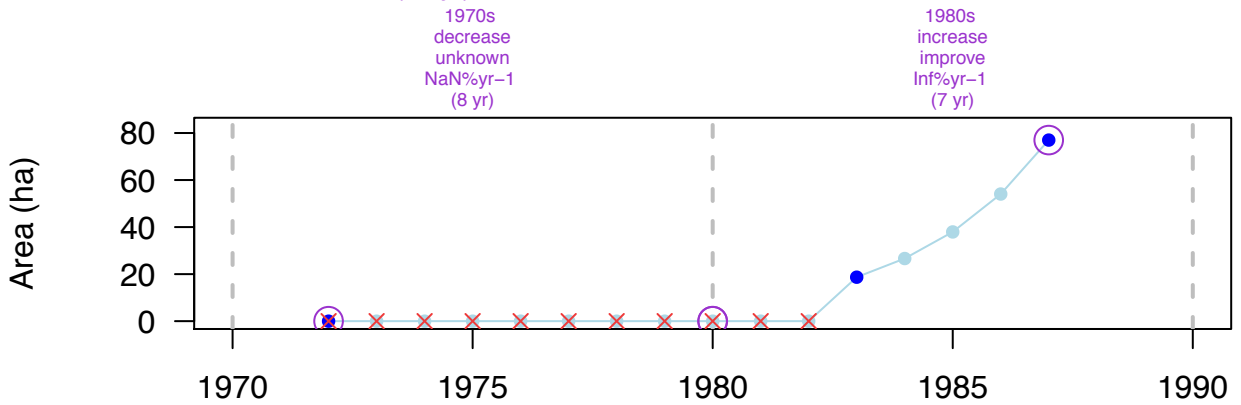

71\_area

Philippart and Dijkema 1995

SITE: Linthorst Homanpolder (The Netherlands – Atlantic) – Zn (? m)

OVERALL: Net = 75 ha; Rate = NA % yr<sup>-1</sup>; Perc Final = NA % > increase

DECADAL: YES (16 yr)

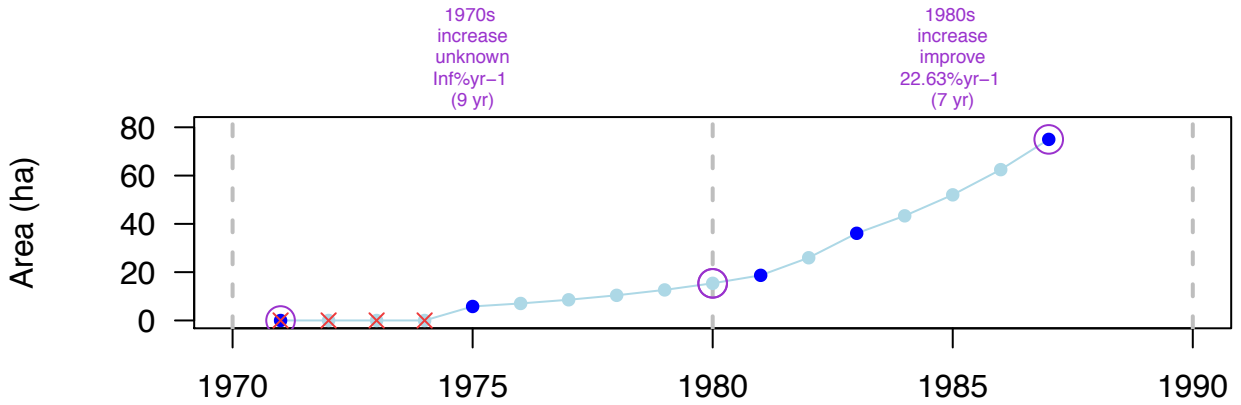

76\_area

Portig 2006

SITE: Lough Foyle (United Kingdom – Atlantic) – Zm (? m)

OVERALL: Net = -189 ha; Rate = -5.33 % yr<sup>-1</sup>; Perc Final = 53 % > decrease

DECADAL: YES (12 yr)

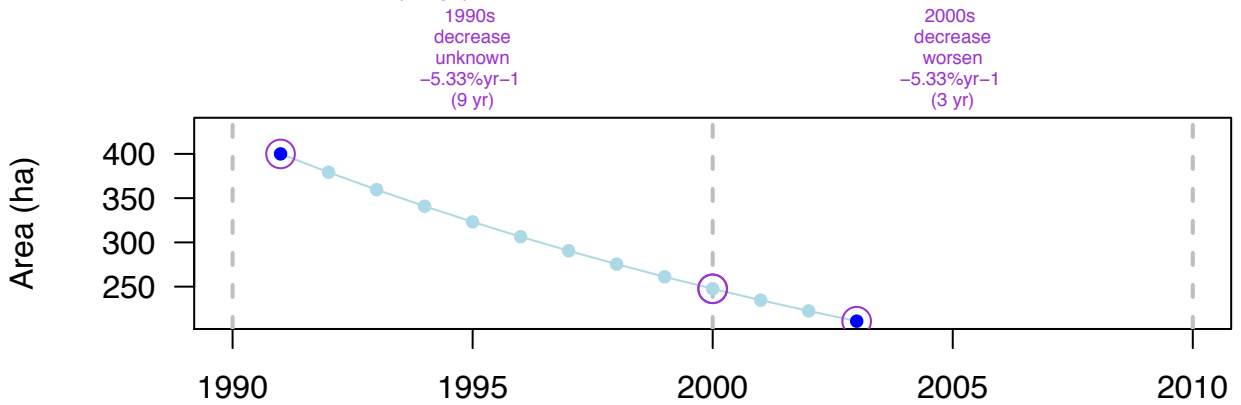

77\_area

Portig 2006

SITE: Strangford Lough (United Kingdom – Atlantic) – Zm (? m)

OVERALL: Net = -646.8 ha; Rate = -1.61 % yr<sup>-1</sup>; Perc Final = 59 % > decrease

DECADAL: YES (33 yr)

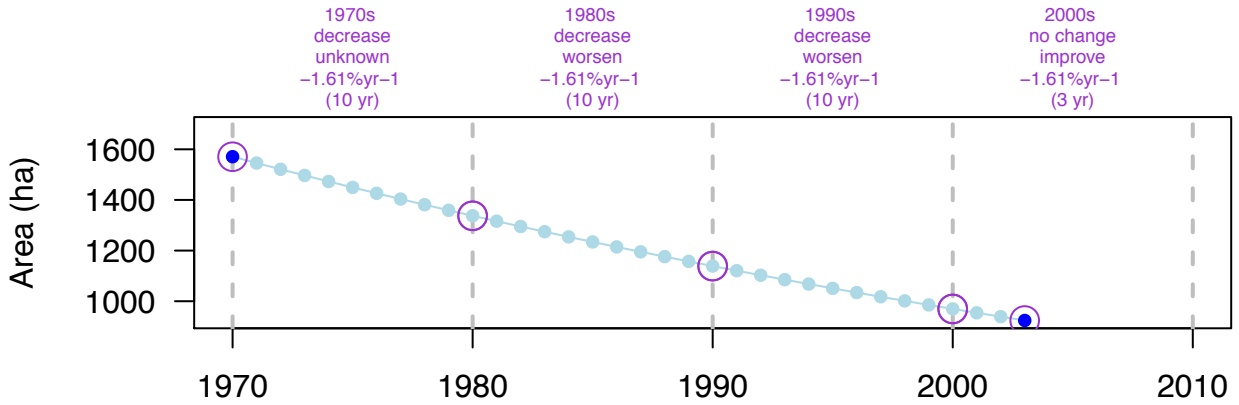

78\_cover

Cook (unpublished)

SITE: Carrick Roads (United Kingdom – Atlantic) – Zn (? m)

OVERALL: Net = 14.26 %; Rate = 18.83 % yr<sup>-1</sup>; Perc Final = 146 % > increase

DECADAL: NO (2 yr)

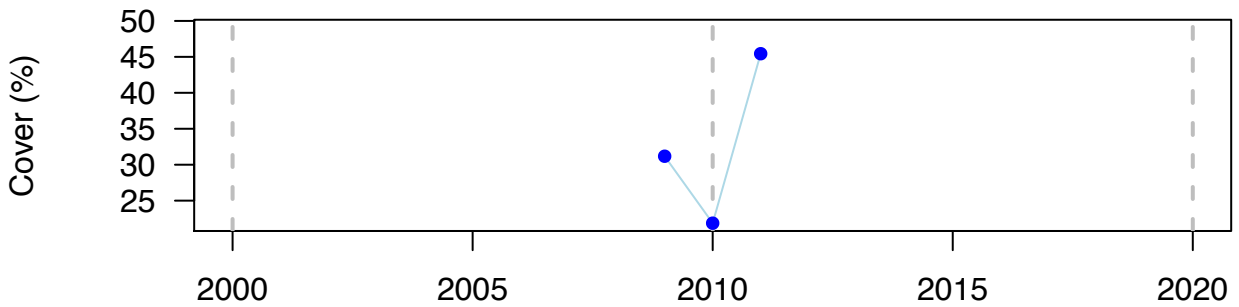

79\_cover

Cook (unpublished)

SITE: Conwy Estuary (United Kingdom – Atlantic) – Zn (? m)

OVERALL: Net = 40 %; Rate = 14.69 % yr<sup>-1</sup>; Perc Final = 180 % > increase

DECADAL: NO (4 yr)

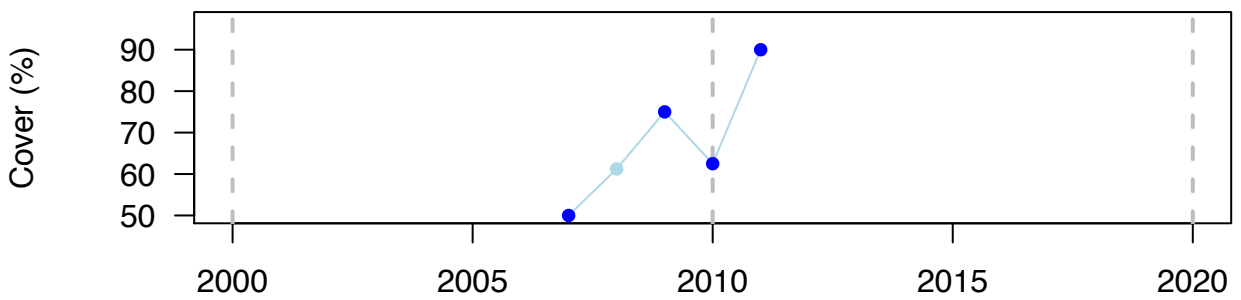

80\_cover

Cook (unpublished)

SITE: Exe Estuary (United Kingdom – Atlantic) – Zn (? m)

OVERALL: Net = 15.46 %; Rate = 7.26 % yr<sup>-1</sup>; Perc Final = 124 % > no change

DECADAL: NO (3 yr)

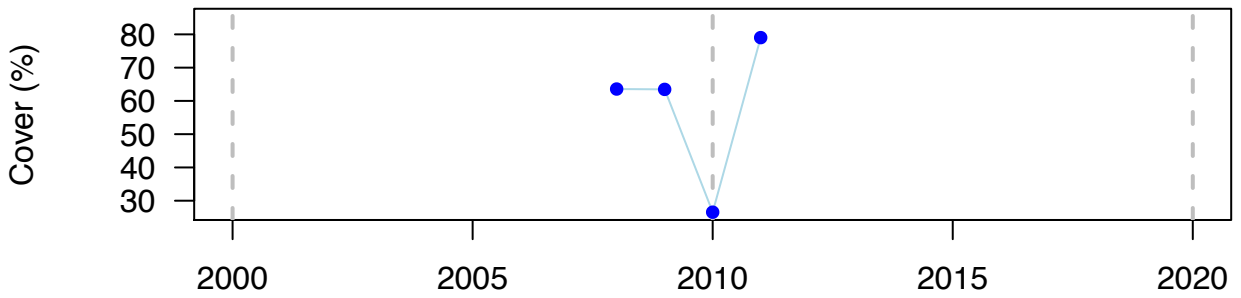



81\_cover

Cook (unpublished)

SITE: Foryd bay (United Kingdom – Atlantic) – Zn (? m)

OVERALL: Net = -14.54 %; Rate = -11.55 % yr<sup>-1</sup>; Perc Final = 63 % > decrease

DECADAL: NO (4 yr)

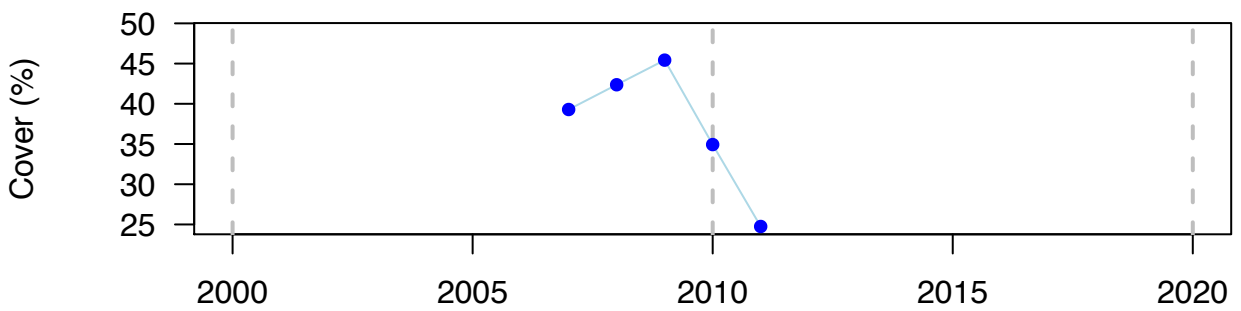

82\_cover

Cook (unpublished)

SITE: Milford Haven (United Kingdom – Atlantic) – Zn (? m)

OVERALL: Net = 3.28 %; Rate = 1.81 % yr<sup>-1</sup>; Perc Final = 106 % > no change

DECADAL: NO (3 yr)

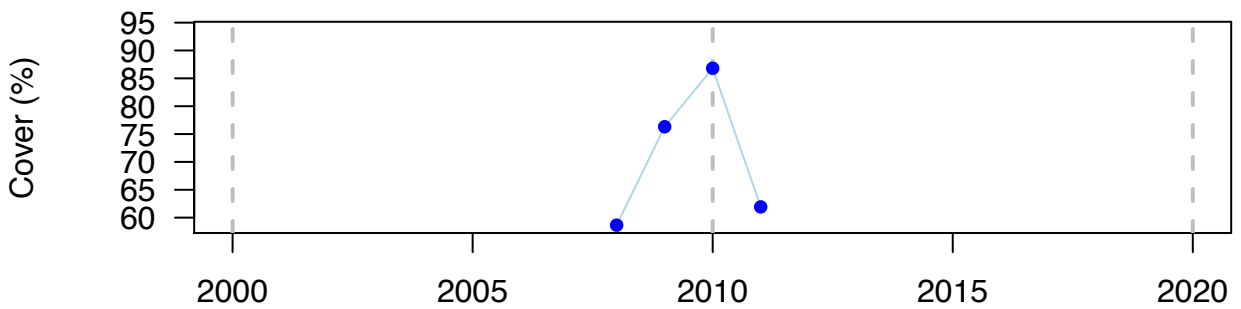

83\_cover

Cook (unpublished)

SITE: Milford Haven (coastal) (United Kingdom – Atlantic) – Zn (? m)

OVERALL: Net = -13.18 %; Rate = -13.73 % yr<sup>-1</sup>; Perc Final = 76 % > no change

DECADAL: NO (2 yr)

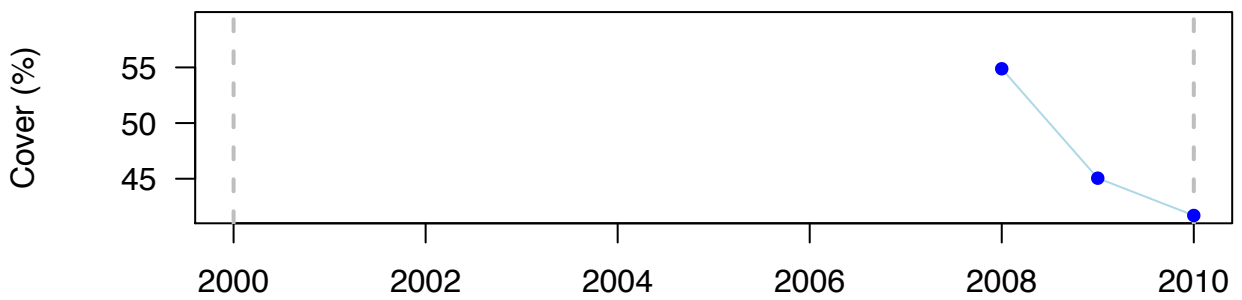

84\_cover

Cook (unpublished)

SITE: Pagham Harbour (coastal) (United Kingdom – Atlantic) – Zm (? m)

OVERALL: Net = 28.02 %; Rate = 15.03 % yr<sup>-1</sup>; Perc Final = 157 % > increase

DECADAL: NO (3 yr)

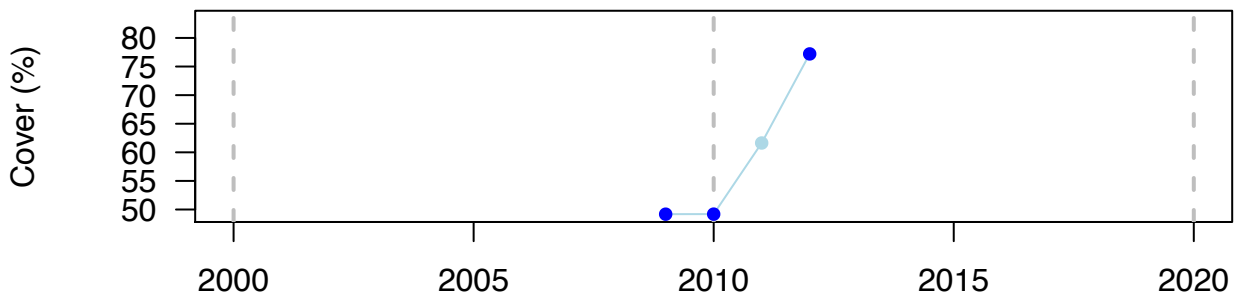

85\_cover

Cook (unpublished)

SITE: Portsmouth Harbour (coastal) (United Kingdom – Atlantic) – Zn (? m)

OVERALL: Net = -20.6 %; Rate = -23.7 % yr<sup>-1</sup>; Perc Final = 62 % > decrease

DECADAL: NO (2 yr)

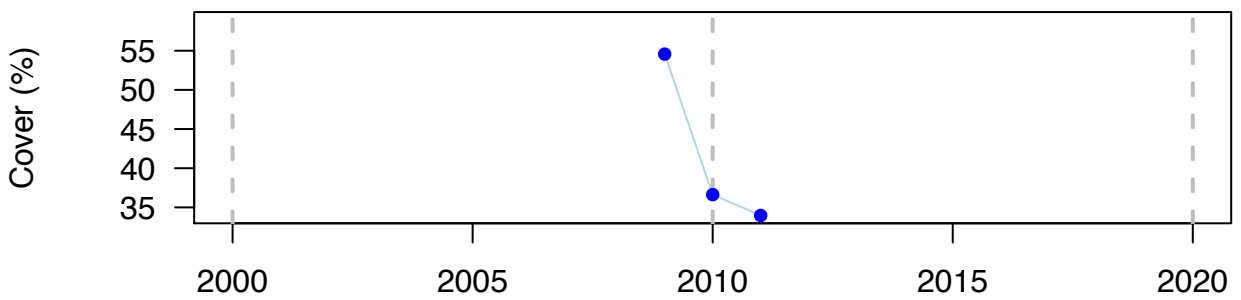

86\_cover

Cook (unpublished)

SITE: Solent (United Kingdom – Atlantic) – Zn (? m)

OVERALL: Net = -15.17 %; Rate = -11.79 % yr<sup>-1</sup>; Perc Final = 79 % > no change

DECADAL: NO (2 yr)

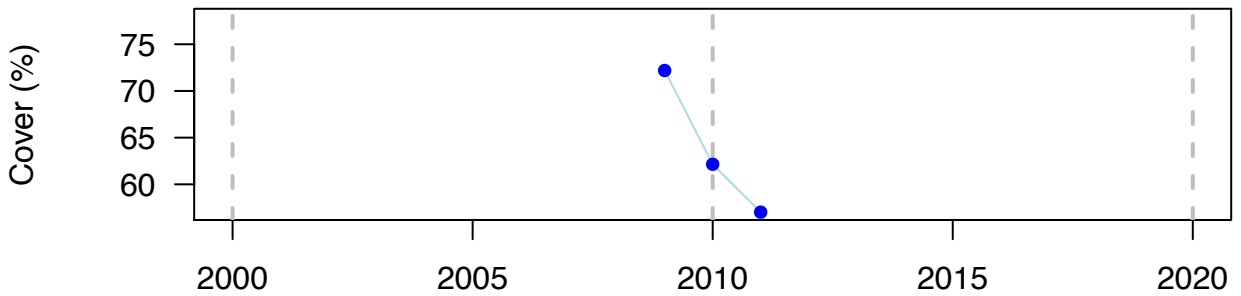

87\_cover

Cook (unpublished)

SITE: Solent (United Kingdom – Atlantic) – Zm (? m)

OVERALL: Net = -9.62 %; Rate = -57.18 % yr<sup>-1</sup>; Perc Final = 32 % > decrease

DECADAL: NO (2 yr)

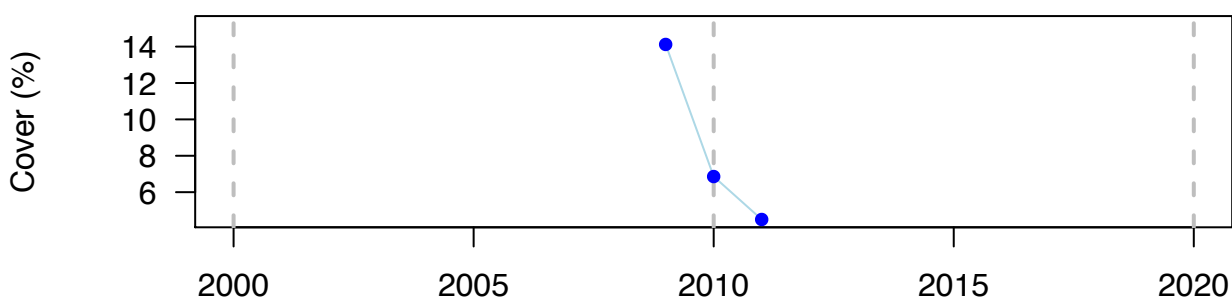

88\_cover

Cook (unpublished)

SITE: Thames Estuary (United Kingdom – Atlantic) – Zn (? m)

OVERALL: Net = -41.45 %; Rate = -13.65 % yr<sup>-1</sup>; Perc Final = 58 % > decrease

DECADAL: NO (4 yr)

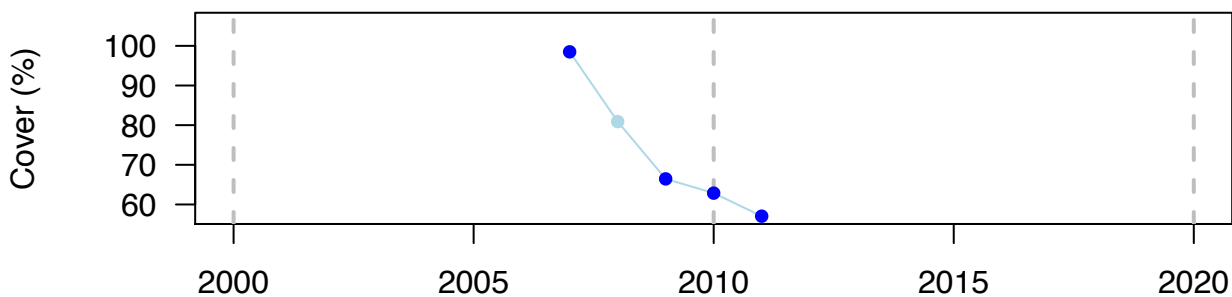

89\_cover

Cook (unpublished)

SITE: Thames Estuary (United Kingdom – Atlantic) – Zm (? m)

OVERALL: Net = 9.42 %; Rate = 26.96 % yr<sup>-1</sup>; Perc Final = 171 % > increase

DECADAL: NO (2 yr)

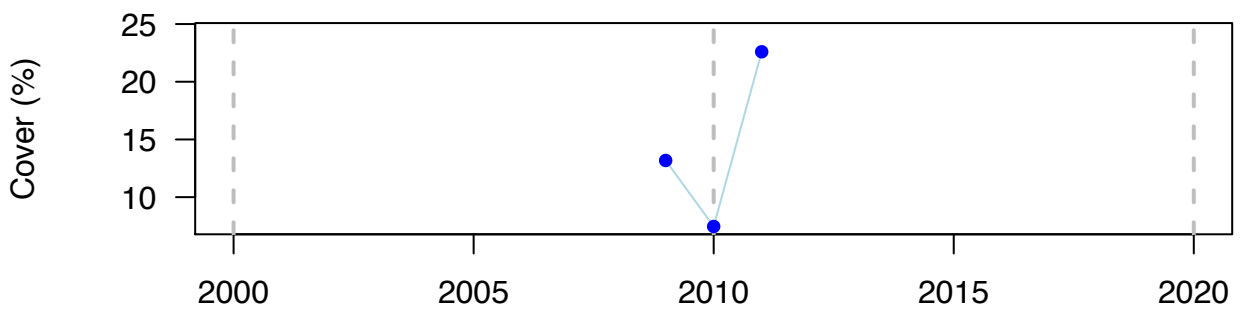

90\_area

Den Hartog 1994

SITE: Langstone Harbour (United Kingdom – Atlantic) – Zm (? m)

OVERALL: Net = -10 ha; Rate = NA % yr<sup>-1</sup>; Perc Final = NA % > decrease

DECADAL: NO (6 yr)

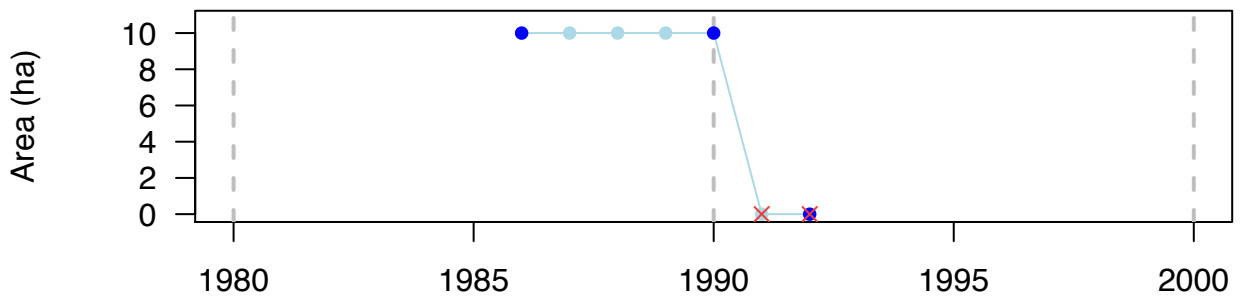

91\_biomass

Milchakova and Phillips 2003

SITE: Holland Bay (Ukraine – Mediterranean) – Zm (-2 m)

OVERALL: Net = -513 g dw m<sup>-2</sup>; Rate = -0.93 % yr<sup>-1</sup>; Perc Final = 85 % > no change

DECADAL: YES (18 yr)

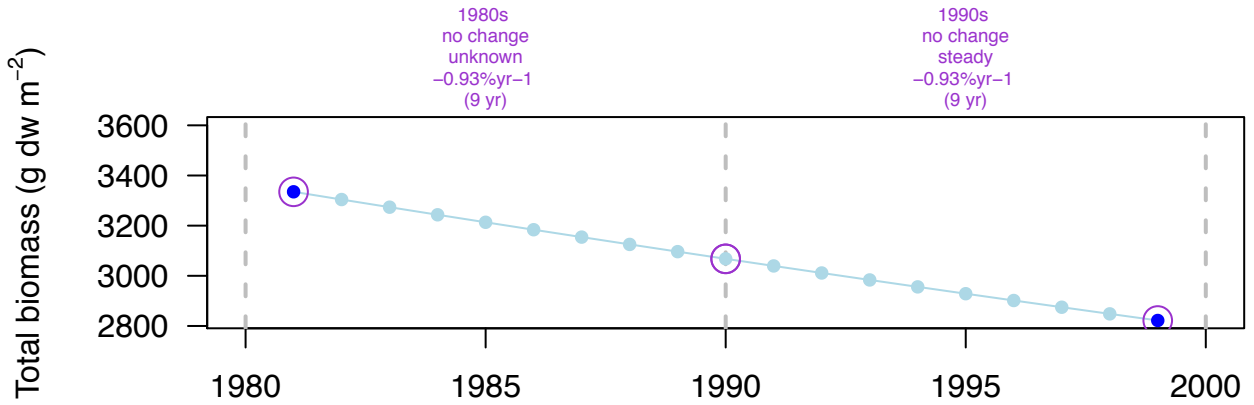

91\_density

Milchakova and Phillips 2003

SITE: Holland Bay (Ukraine – Mediterranean) – Zm (-2 m)

OVERALL: Net = 216 shoot m<sup>-2</sup>; Rate = 1.45 % yr<sup>-1</sup>; Perc Final = 130 % > increase

DECADAL: YES (18 yr)

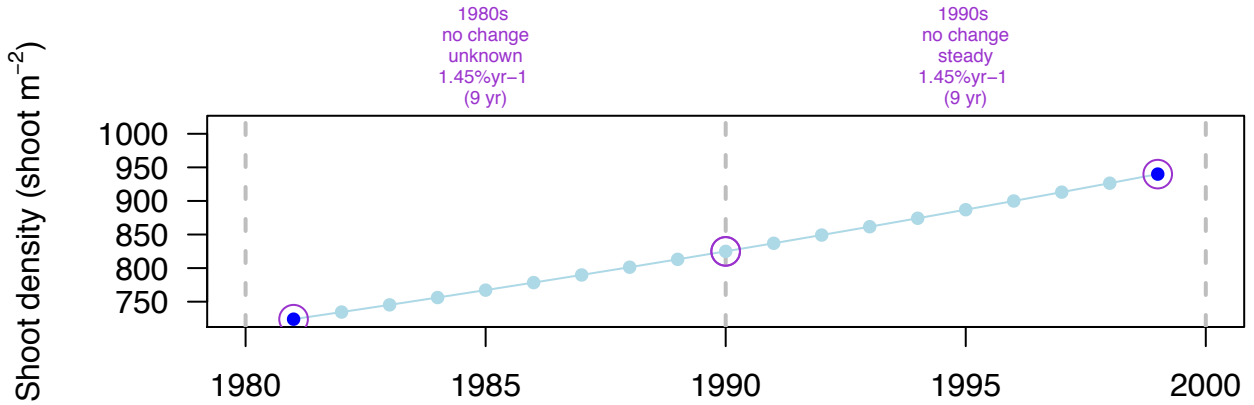

92\_biomass

Milchakova and Phillips 2003

SITE: Kazachaya Bay (Ukraine – Mediterranean) – Zm (-1 m)

OVERALL: Net = 950 g dw m<sup>-2</sup>; Rate = 2.78 % yr<sup>-1</sup>; Perc Final = 165 % > increase

DECADAL: YES (18 yr)

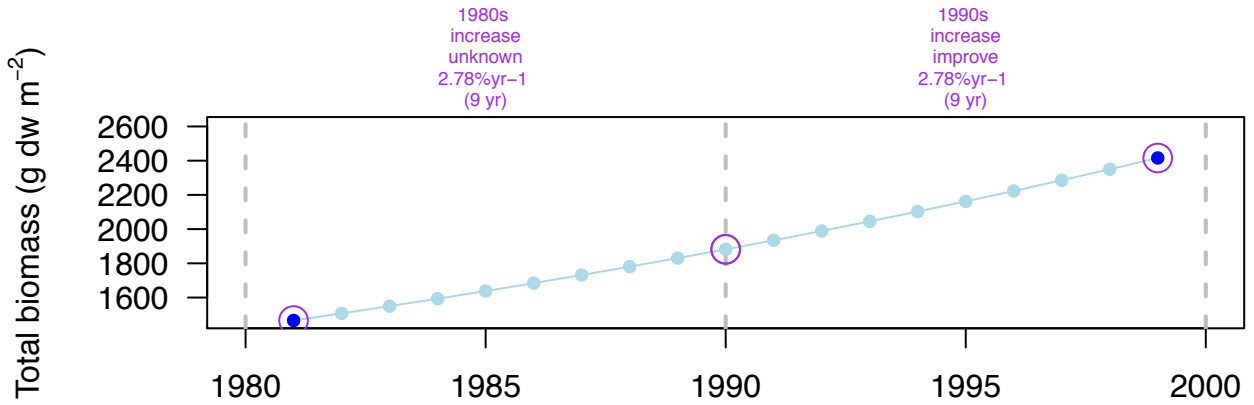

92\_density

Milchakova and Phillips 2003

SITE: Kazachaya Bay (Ukraine – Mediterranean) – Zm (-1 m)

OVERALL: Net = 112 shoot m<sup>-2</sup>; Rate = 2.47 % yr<sup>-1</sup>; Perc Final = 156 % > increase

DECADAL: YES (18 yr)

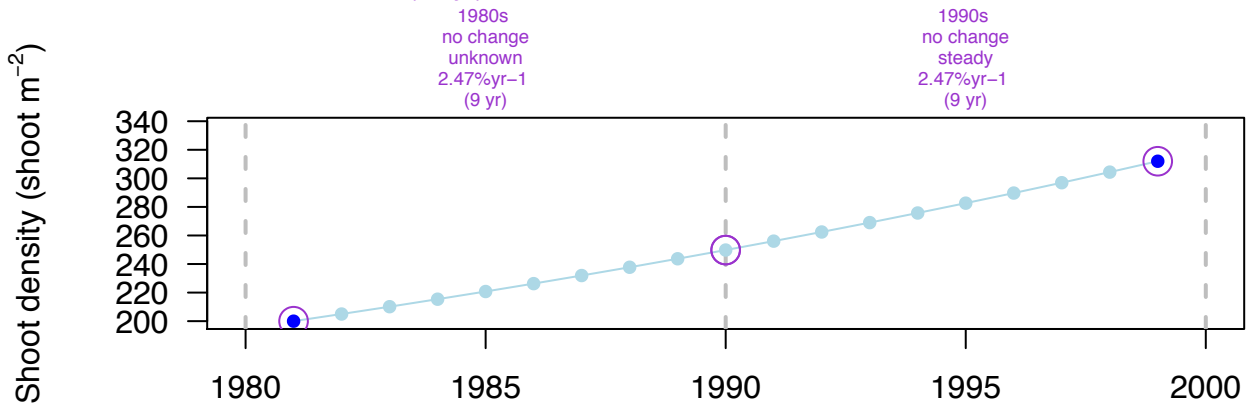

93\_biomass

Milchakova and Phillips 2003

SITE: Kazachaya Bay (Ukraine – Mediterranean) – Zm (-3 m)

OVERALL: Net = 629 g dw m<sup>-2</sup>; Rate = 1.88 % yr<sup>-1</sup>; Perc Final = 140 % > increase

DECADAL: YES (18 yr)

Total biomass (g dw m<sup>-2</sup>)

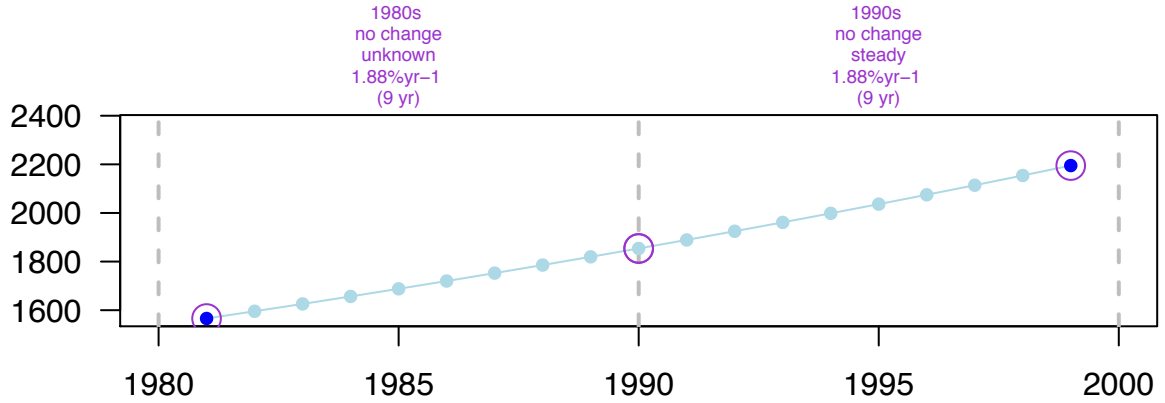

93\_density

Milchakova and Phillips 2003

SITE: Kazachaya Bay (Ukraine – Mediterranean) – Zm (-3 m)

OVERALL: Net = 220 shoot m<sup>-2</sup>; Rate = 3.53 % yr<sup>-1</sup>; Perc Final = 189 % > increase

DECADAL: YES (18 yr)

Shoot density (shoot m<sup>-2</sup>)

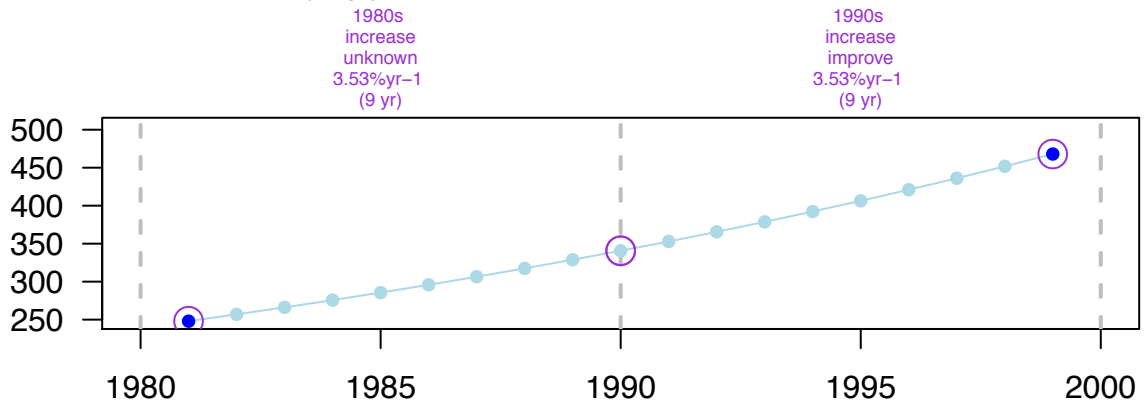



94\_biomass

Milchakova and Phillips 2003

SITE: Kerch Bay (Ukraine – Mediterranean) – Zm (-3 m)

OVERALL: Net = 2773 g dw m<sup>-2</sup>; Rate = 6.7 % yr<sup>-1</sup>; Perc Final = 334 % > increase

DECADAL: YES (18 yr)

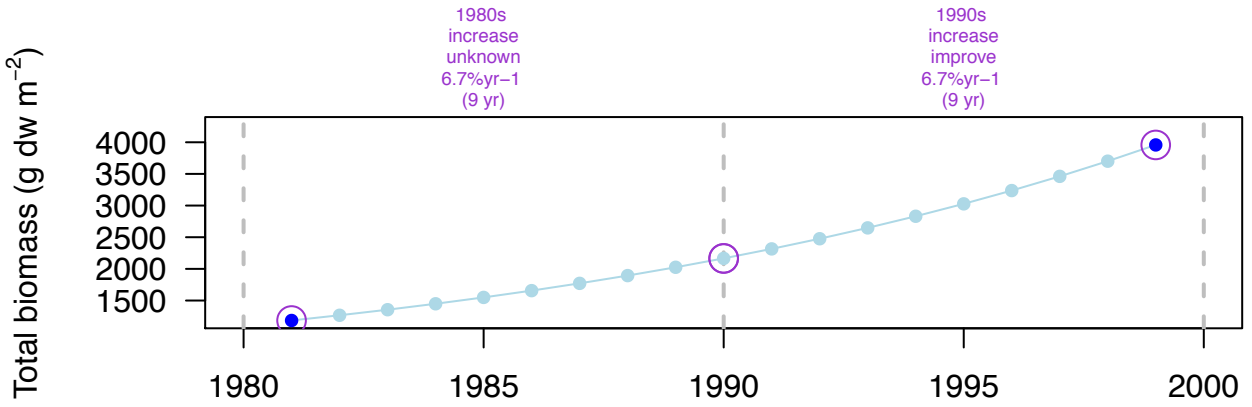

94\_density

Milchakova and Phillips 2003

SITE: Kerch Bay (Ukraine – Mediterranean) – Zm (-3 m)

OVERALL: Net = 374 shoot m<sup>-2</sup>; Rate = 5.42 % yr<sup>-1</sup>; Perc Final = 265 % > increase

DECADAL: YES (18 yr)

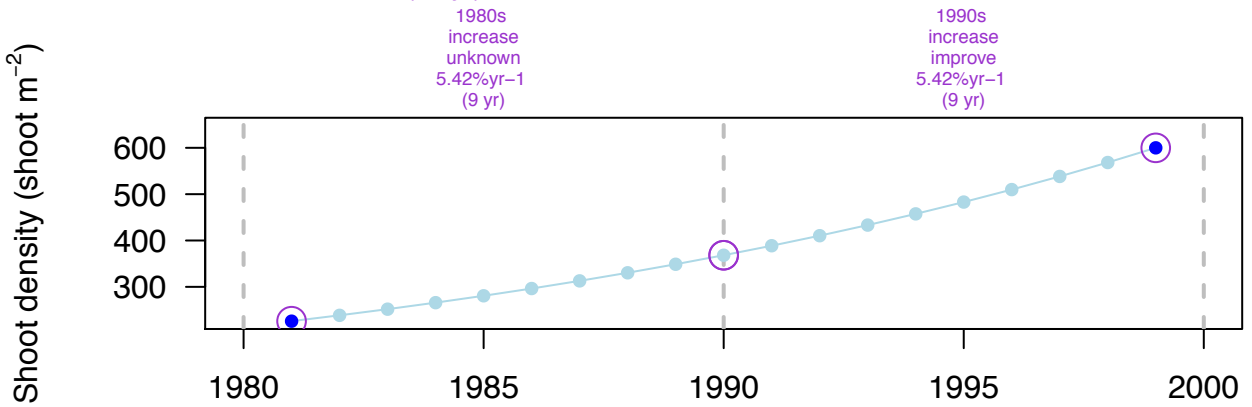

95\_biomass

Milchakova and Phillips 2003

SITE: Kerch Strait (Ukraine – Mediterranean) – Zm (-3 m)

OVERALL: Net = 2539 g dw m<sup>-2</sup>; Rate = 3.28 % yr<sup>-1</sup>; Perc Final = 180 % > increase

DECADAL: YES (18 yr)

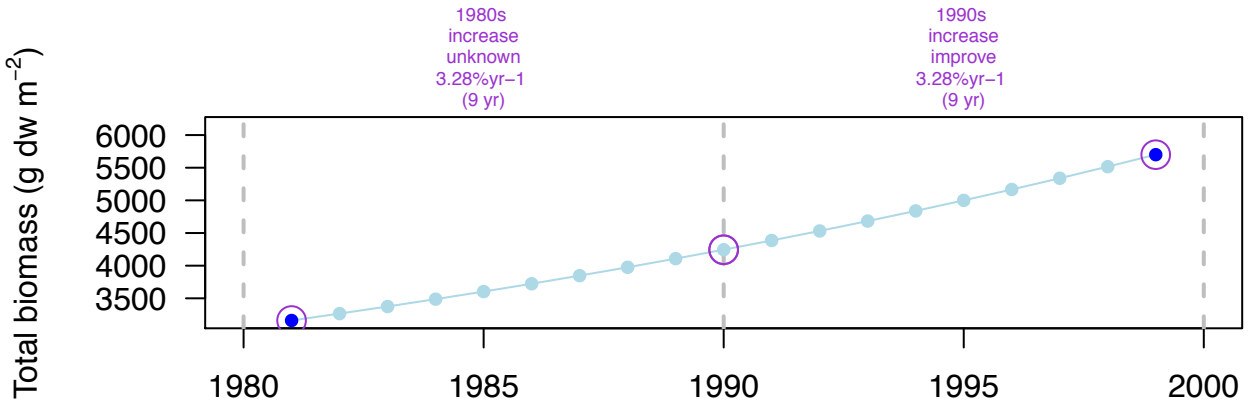

95\_density

Milchakova and Phillips 2003

SITE: Kerch Strait (Ukraine – Mediterranean) – Zm (-3 m)

OVERALL: Net = -521 shoot m<sup>-2</sup>; Rate = -4.16 % yr<sup>-1</sup>; Perc Final = 47 % > decrease

DECADAL: YES (18 yr)

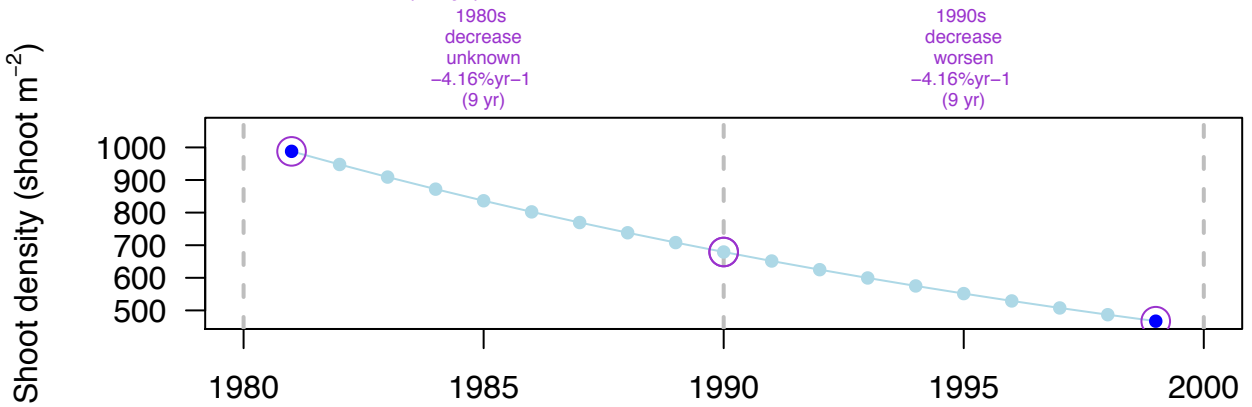

96\_cover

Cook (unpublished)

SITE: Portsmouth Harbour (coastal) (United Kingdom – Atlantic) – Zm (? m)

OVERALL: Net = -15.88 %; Rate = -20.03 % yr<sup>-1</sup>; Perc Final = 67 % > decrease

DECADAL: NO (2 yr)

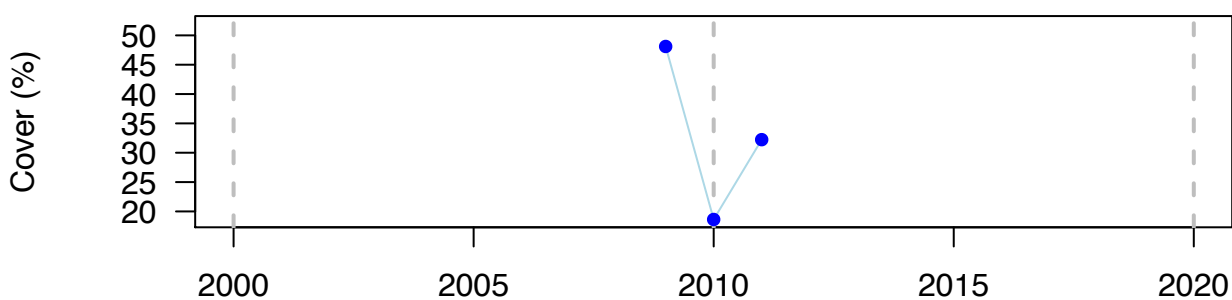

97\_biomass

Milchakova and Phillips 2003

SITE: Laspi Bay (Ukraine – Mediterranean) – Zm (-5 m)

OVERALL: Net = 1309 g dw m<sup>-2</sup>; Rate = 5.26 % yr<sup>-1</sup>; Perc Final = 258 % > increase

DECADAL: YES (18 yr)

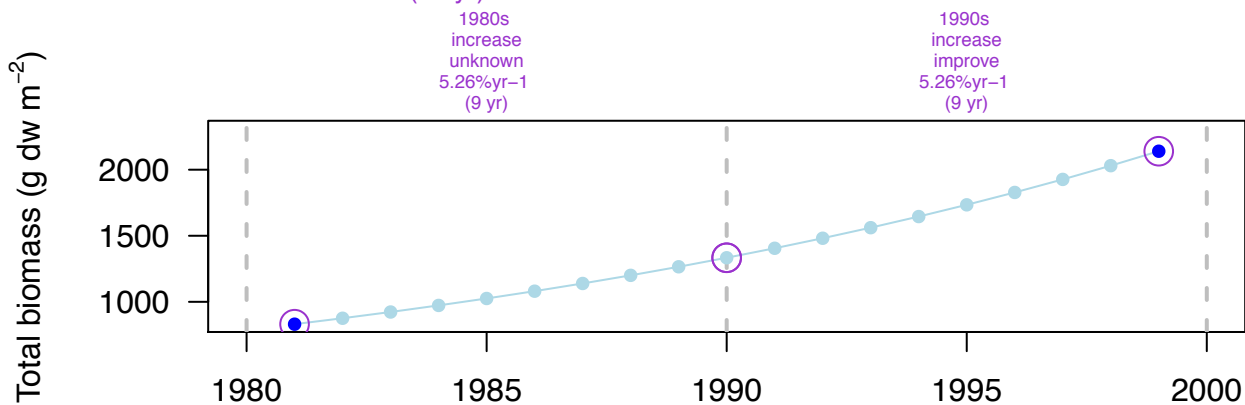

97\_density

Milchakova and Phillips 2003

SITE: Laspi Bay (Ukraine – Mediterranean) – Zm (-5 m)

OVERALL: Net = 137 shoot m<sup>-2</sup>; Rate = 1.42 % yr<sup>-1</sup>; Perc Final = 129 % > increase

DECADAL: YES (18 yr)

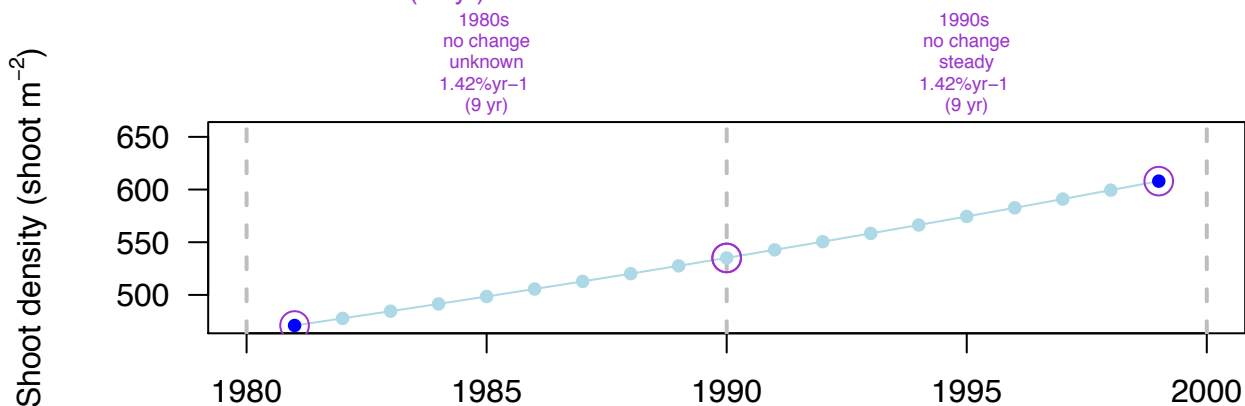

98\_biomass

Milchakova and Phillips 2003

SITE: Severnaya Bay (Ukraine – Mediterranean) – Zm (-2 m)

OVERALL: Net = 1575 g dw m<sup>-2</sup>; Rate = 4.06 % yr<sup>-1</sup>; Perc Final = 208 % > increase

DECADAL: YES (18 yr)

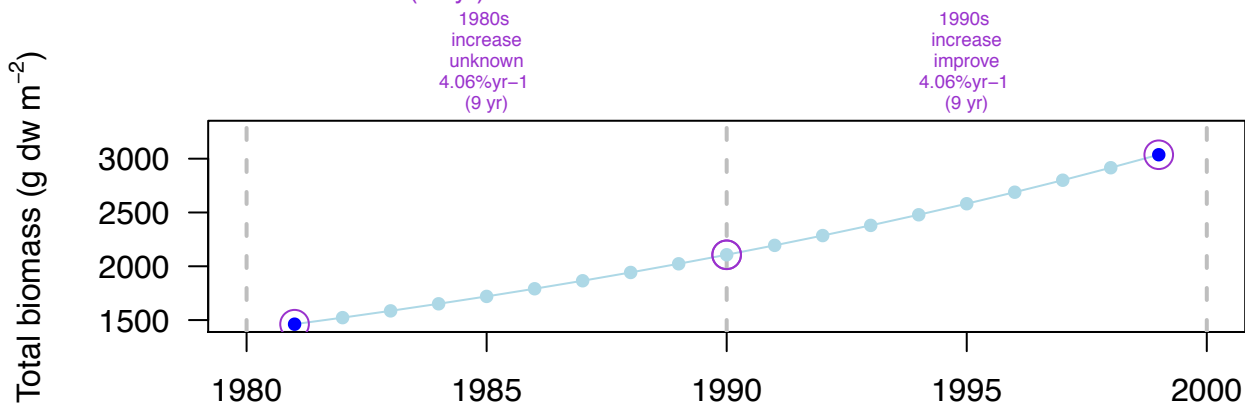

98\_density

Milchakova and Phillips 2003

SITE: Severnaya Bay (Ukraine – Mediterranean) – Zm (-2 m)

OVERALL: Net = 368 shoot m<sup>-2</sup>; Rate = 3.68 % yr<sup>-1</sup>; Perc Final = 194 % > increase

DECADAL: YES (18 yr)

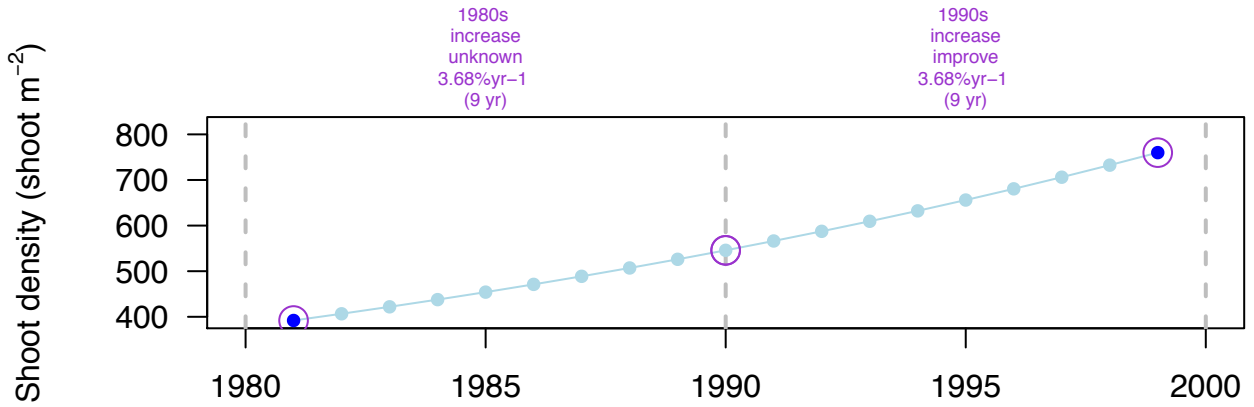

99\_biomass

Milchakova and Phillips 2003

SITE: Streletszkaya Bay (Ukraine – Mediterranean) – Zm (-2 m)

OVERALL: Net = 1654 g dw m<sup>-2</sup>; Rate = 4 % yr<sup>-1</sup>; Perc Final = 205 % > increase

DECADAL: YES (18 yr)

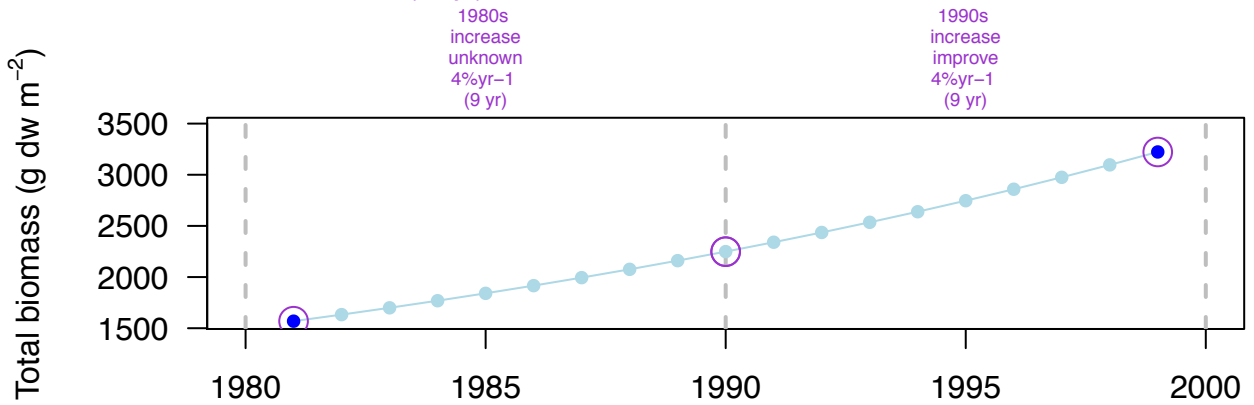

99\_density

Milchakova and Phillips 2003

SITE: Streletsкая Bay (Ukraine – Mediterranean) – Zm (-2 m)

OVERALL: Net = 684 shoot m<sup>-2</sup>; Rate = 7.29 % yr<sup>-1</sup>; Perc Final = 371 % > increase

DECADAL: YES (18 yr)

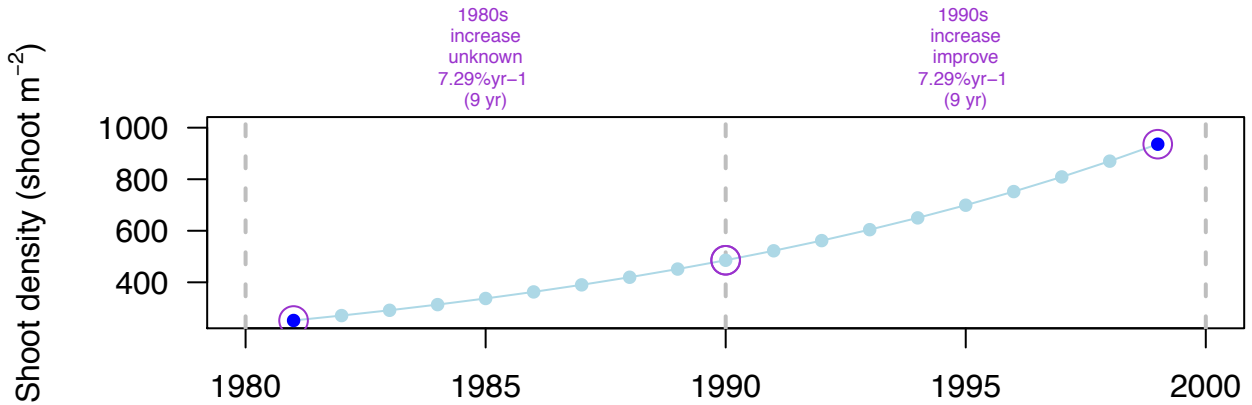

100\_lowerlimit

Dural et al. 2012

SITE: Hekim Island (Turkey – Mediterranean) – Po (? m)

OVERALL: Net = -8 m; Rate = -3.06 % yr<sup>-1</sup>; Perc Final = 71 % > decrease

DECADAL: YES (11 yr)

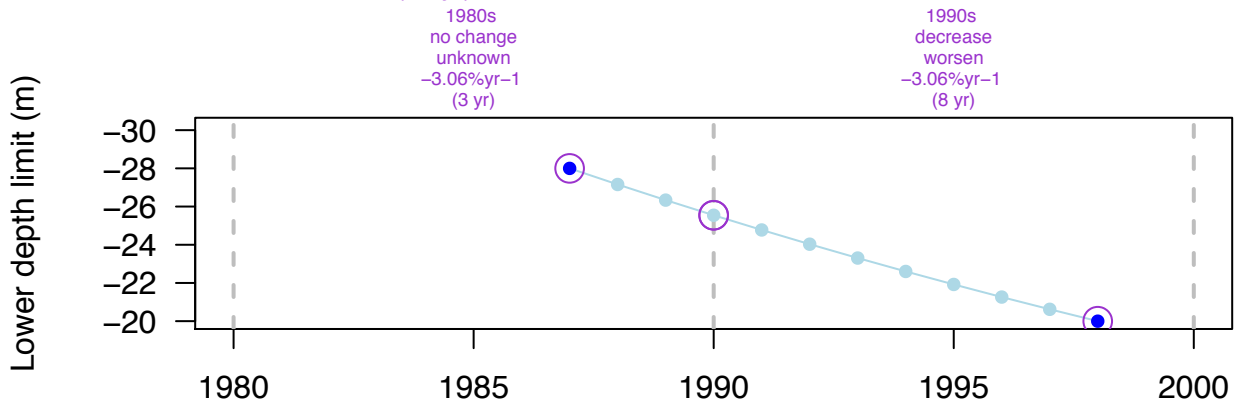

101\_area

de Jong (unpublished)

SITE: Eastern Scheldt (The Netherlands – Atlantic) – Zn (0.4 m)

OVERALL: Net = -924.3 ha; Rate = -11.94 % yr<sup>-1</sup>; Perc Final = 2 % > decrease

DECADAL: YES (32 yr)

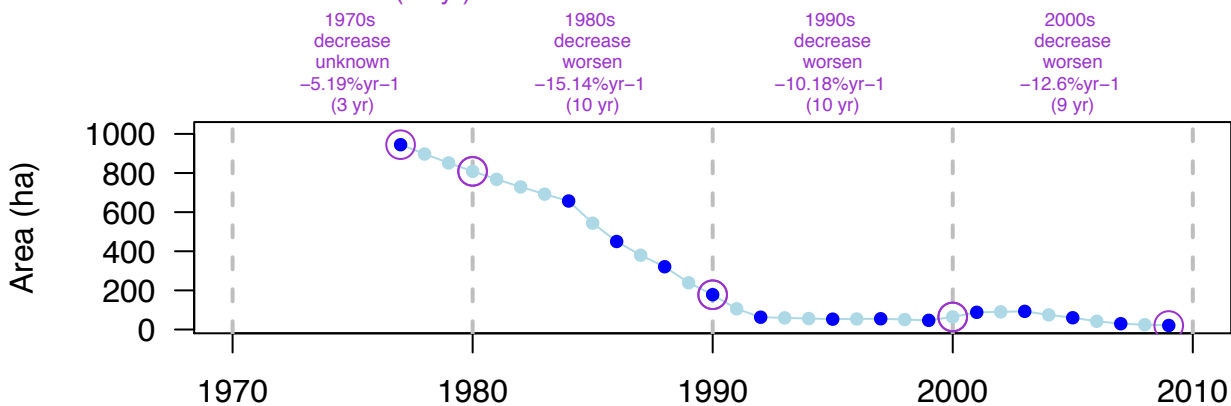

101\_lowerlimit

de Jong (unpublished)

SITE: Eastern Scheldt (The Netherlands – Atlantic) – Zn (0.4 m)

OVERALL: Net = 0 m; Rate = 0 % yr<sup>-1</sup>; Perc Final = 100 % > no change

DECADAL: YES (32 yr)

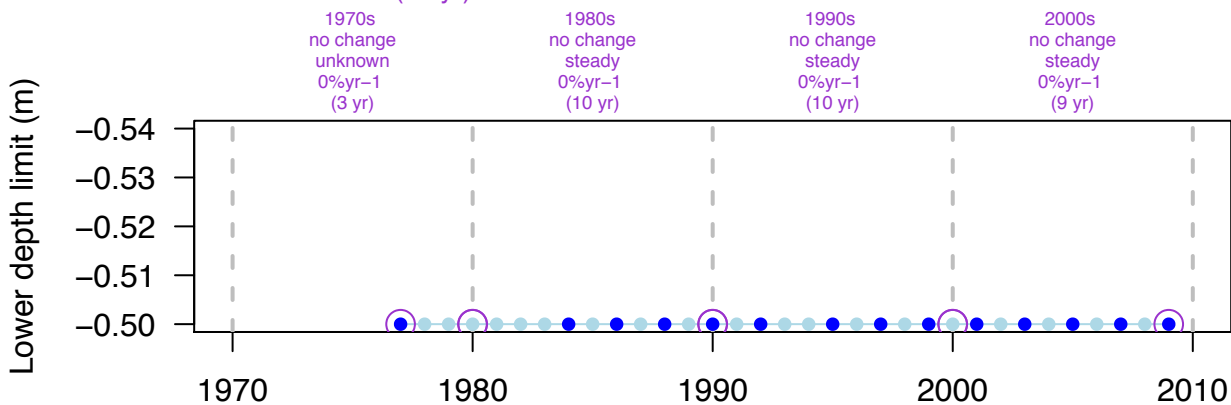

101\_upperlimit

de Jong (unpublished)

SITE: Eastern Scheldt (The Netherlands – Atlantic) – Zn (0.4 m)

OVERALL: Net = 0 m; Rate = 0 % yr<sup>-1</sup>; Perc Final = 100 % > no change

DECADAL: YES (32 yr)

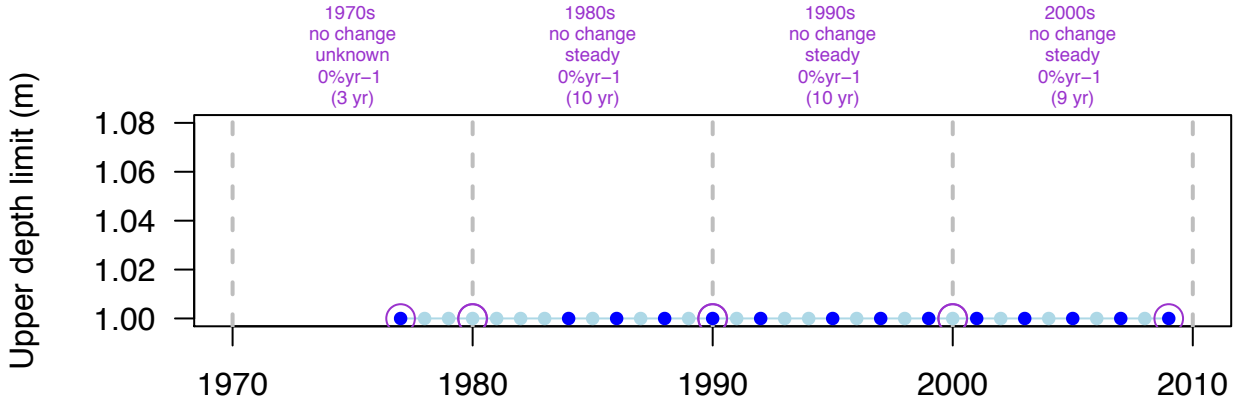

102\_area

de Jong (unpublished)

SITE: Eastern Scheldt Galgeplaat (The Netherlands – Atlantic) – Zm (-0.2 m)

OVERALL: Net = -1 ha; Rate = NA % yr<sup>-1</sup>; Perc Final = NA % > decrease

DECADAL: YES (8 yr)

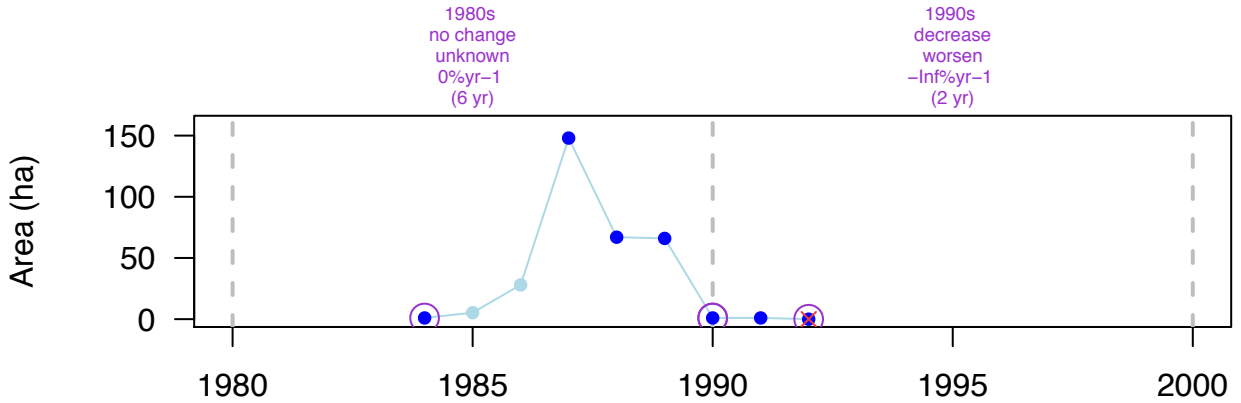



103\_area

de Jong (unpublished)

SITE: Eastern Scheldt Roggenplaat (The Netherlands – Atlantic) – Zm (–0.1 m)

OVERALL: Net = –1 ha; Rate = NA % yr–1; Perc Final = NA % > decrease

DECADAL: YES (22 yr)

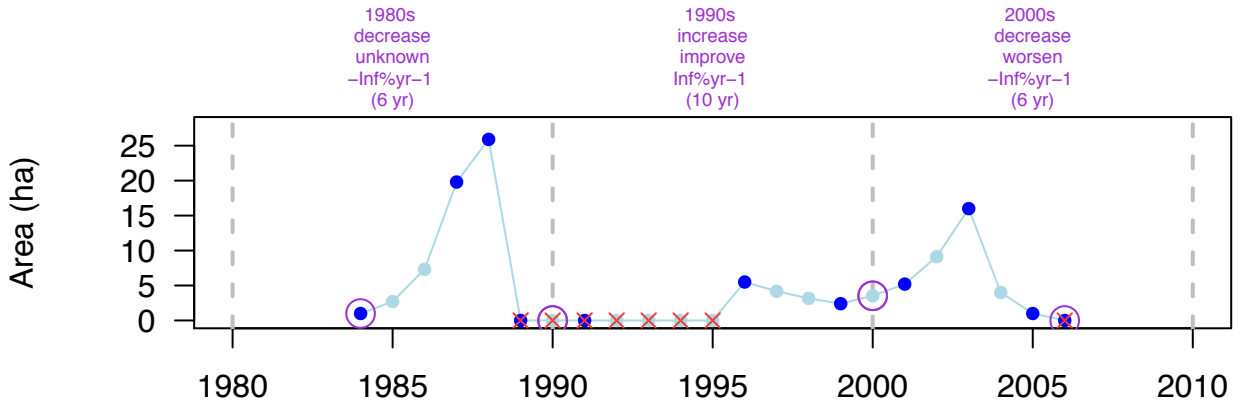

103\_lowerlimit

de Jong (unpublished)

SITE: Eastern Scheldt Roggenplaat (The Netherlands – Atlantic) – Zm (–0.1 m)

OVERALL: Net = 0 m; Rate = 0 % yr–1; Perc Final = 100 % > no change

DECADAL: YES (19 yr)

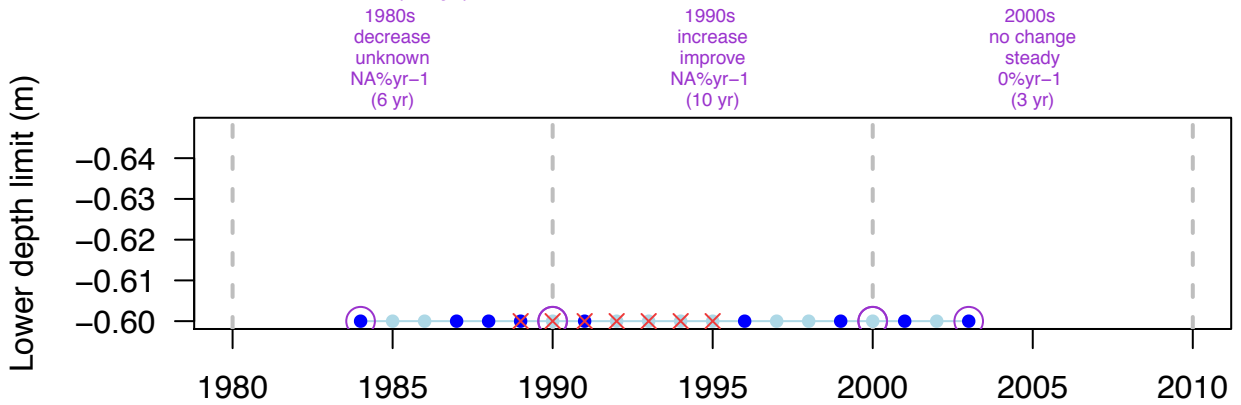

103\_upperlimit

de Jong (unpublished)

SITE: Eastern Scheldt Roggenplaat (The Netherlands – Atlantic) – Zm (-0.1 m)

OVERALL: Net = 0 m; Rate = 0 % yr<sup>-1</sup>; Perc Final = 100 % > no change

DECADAL: YES (19 yr)

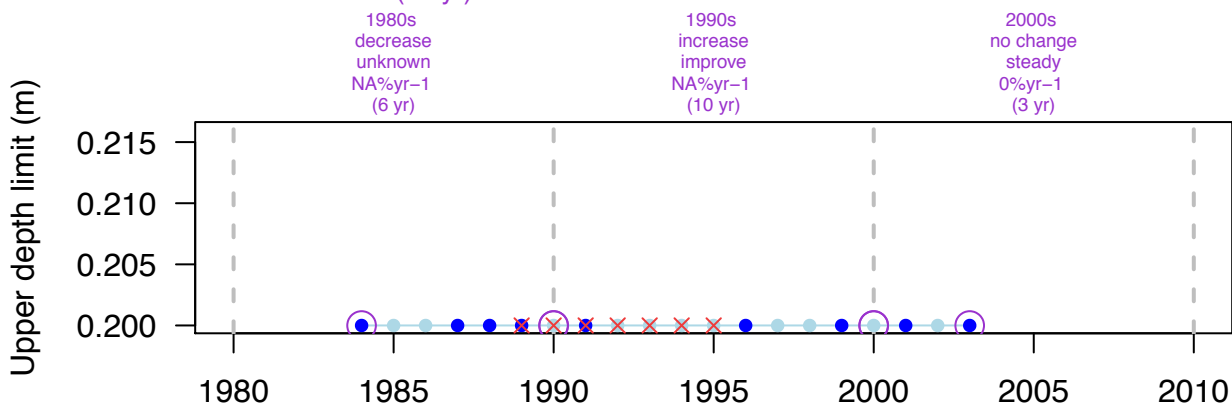

104\_area

de Jong (unpublished)

SITE: Groningen kwelderwerken (The Netherlands – Atlantic) – Zn (0 m)

OVERALL: Net = 91.5 ha; Rate = 8.6 % yr<sup>-1</sup>; Perc Final = 722 % > increase

DECADAL: YES (23 yr)

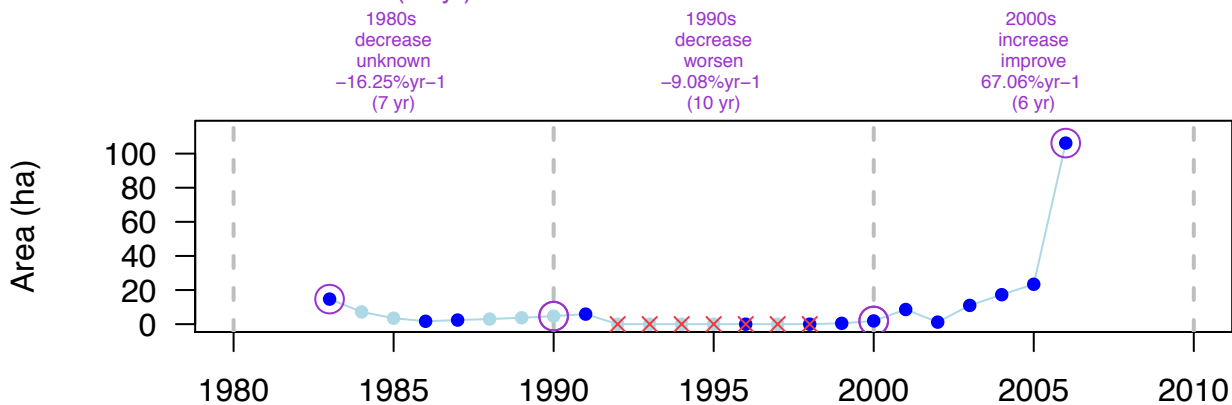

104\_lowerlimit

de Jong (unpublished)

SITE: Groningen kwelderwerken (The Netherlands – Atlantic) – Zn (0 m)

OVERALL: Net = 0 m; Rate = 0 % yr<sup>-1</sup>; Perc Final = 100 % > no change

DECADAL: YES (23 yr)

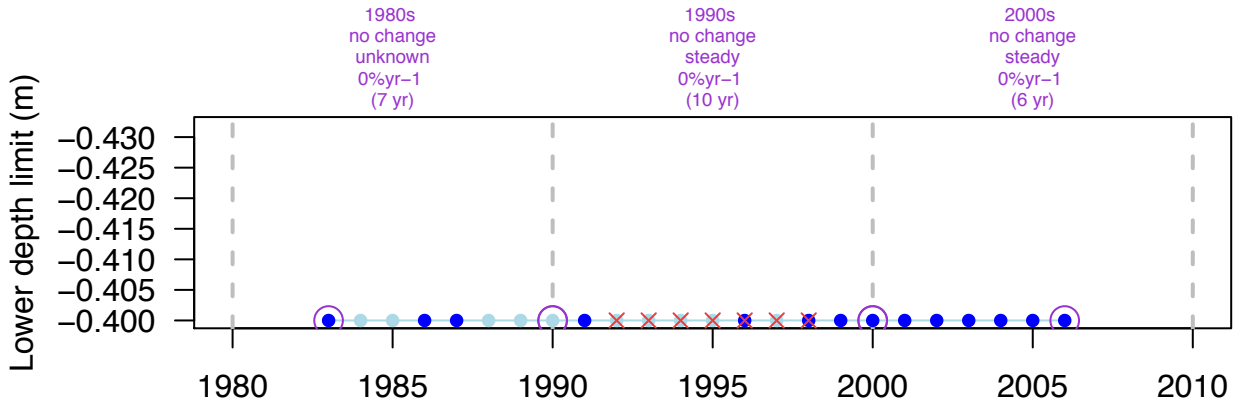

104\_upperlimit

de Jong (unpublished)

SITE: Groningen kwelderwerken (The Netherlands – Atlantic) – Zn (0 m)

OVERALL: Net = 0 m; Rate = 0 % yr<sup>-1</sup>; Perc Final = 100 % > no change

DECADAL: YES (23 yr)

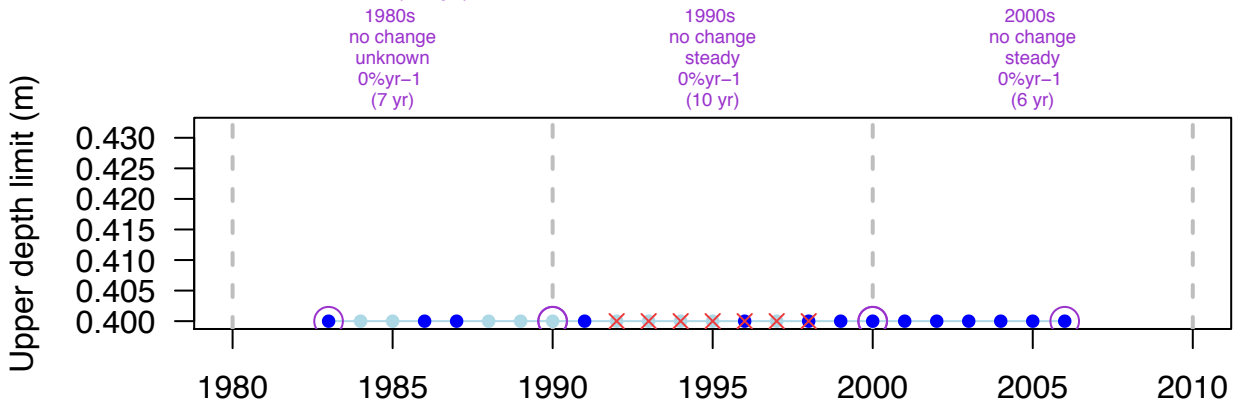

105\_area

de Jong (unpublished)

SITE: Groningen kwelderwerken (The Netherlands – Atlantic) – Zm (0 m)

OVERALL: Net = -0.7 ha; Rate = -2.13 % yr<sup>-1</sup>; Perc Final = 77 % > decrease

DECADAL: YES (12 yr)

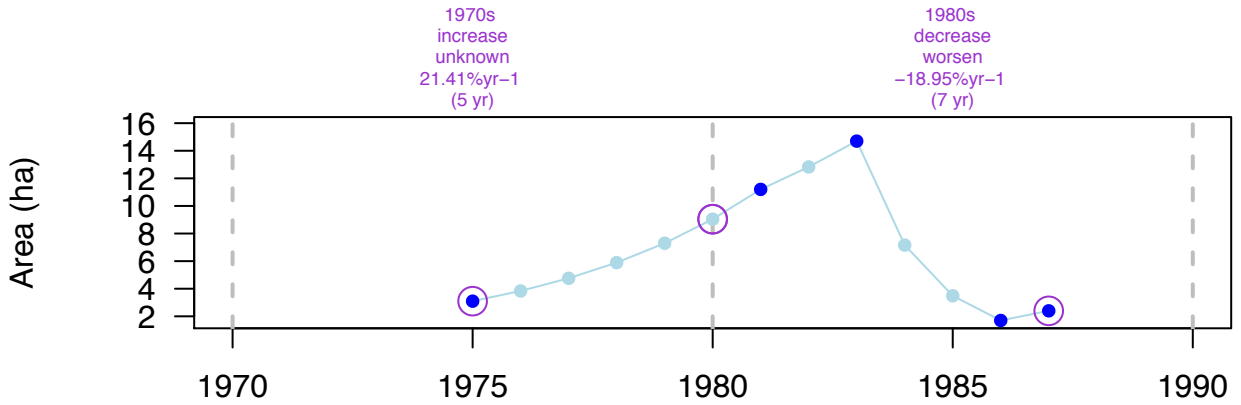

105\_lowerlimit

de Jong (unpublished)

SITE: Groningen kwelderwerken (The Netherlands – Atlantic) – Zm (0 m)

OVERALL: Net = 0 m; Rate = 0 % yr<sup>-1</sup>; Perc Final = 100 % > no change

DECADAL: YES (12 yr)

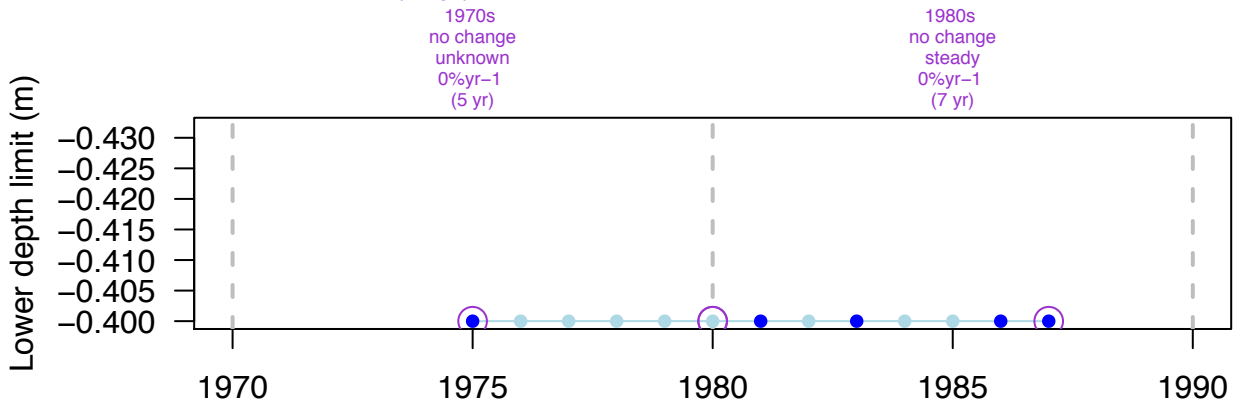

105\_upperlimit

de Jong (unpublished)

SITE: Groningen kwelderwerken (The Netherlands – Atlantic) – Zm (0 m)

OVERALL: Net = 0 m; Rate = 0 % yr<sup>-1</sup>; Perc Final = 100 % > no change

DECADAL: YES (12 yr)

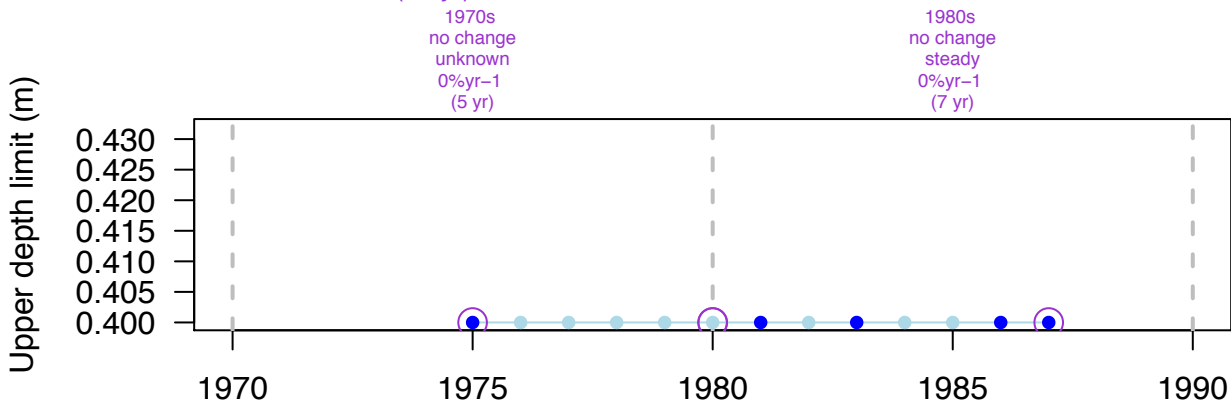

106\_area

de Jong (unpublished)

SITE: Lake Veere (The Netherlands – Atlantic) – Zm (-2 m)

OVERALL: Net = -64.7 ha; Rate = NA % yr<sup>-1</sup>; Perc Final = NA % > decrease

DECADAL: YES (18 yr)

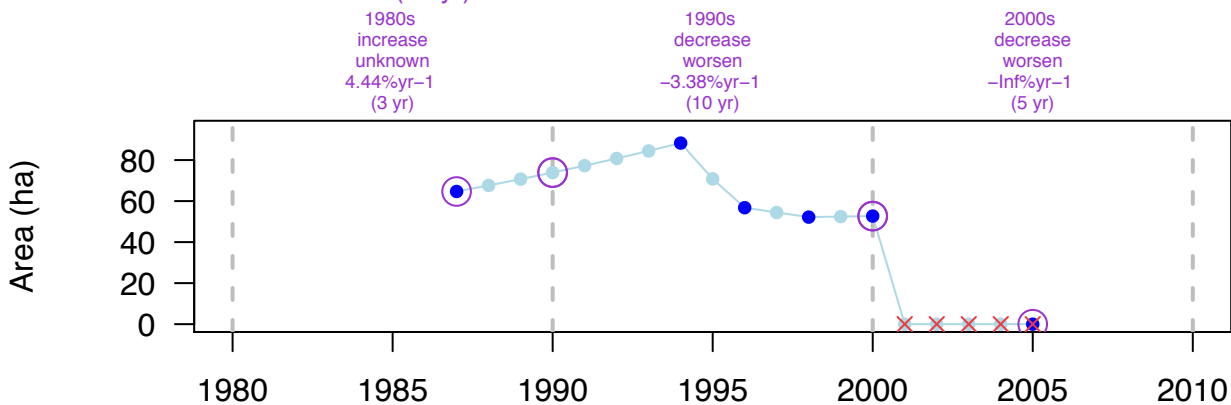

106\_lowerlimit

de Jong (unpublished)

SITE: Lake Veere (The Netherlands – Atlantic) – Zm (-2 m)

OVERALL: Net = NA m; Rate = NA % yr<sup>-1</sup>; Perc Final = NA % > decrease

DECADAL: YES (18 yr)

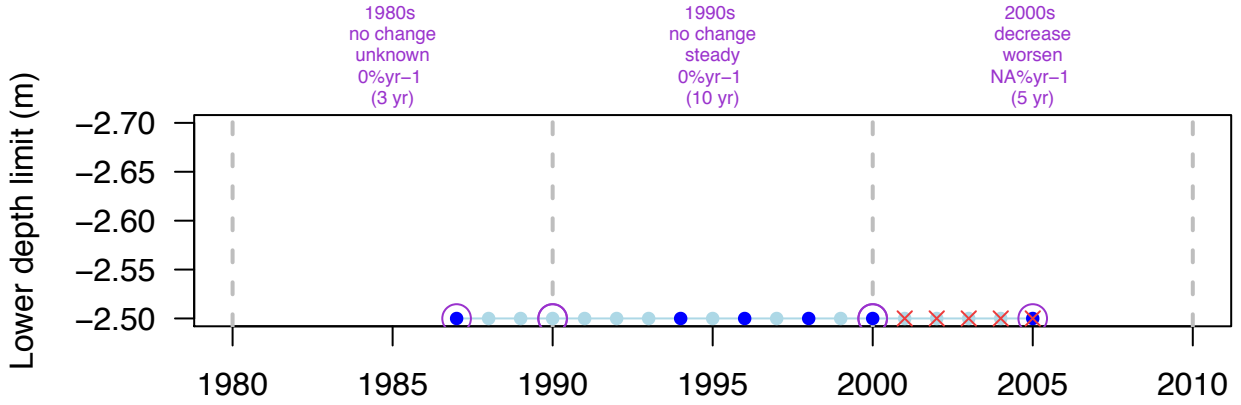

106\_upperlimit

de Jong (unpublished)

SITE: Lake Veere (The Netherlands – Atlantic) – Zm (-2 m)

OVERALL: Net = NA m; Rate = NA % yr<sup>-1</sup>; Perc Final = NA % > decrease

DECADAL: YES (18 yr)

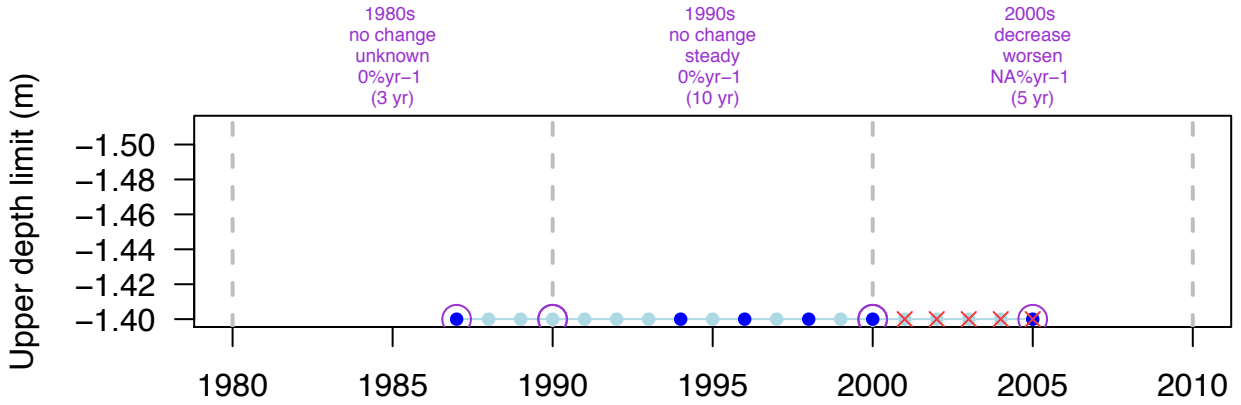

107\_area

de Jong (unpublished)

SITE: Westerschelde Sloehaven (The Netherlands – Atlantic) – Zn (0.8 m)

OVERALL: Net = -3.8 ha; Rate = -6.2 % yr<sup>-1</sup>; Perc Final = 24 % > decrease

DECADAL: YES (23 yr)

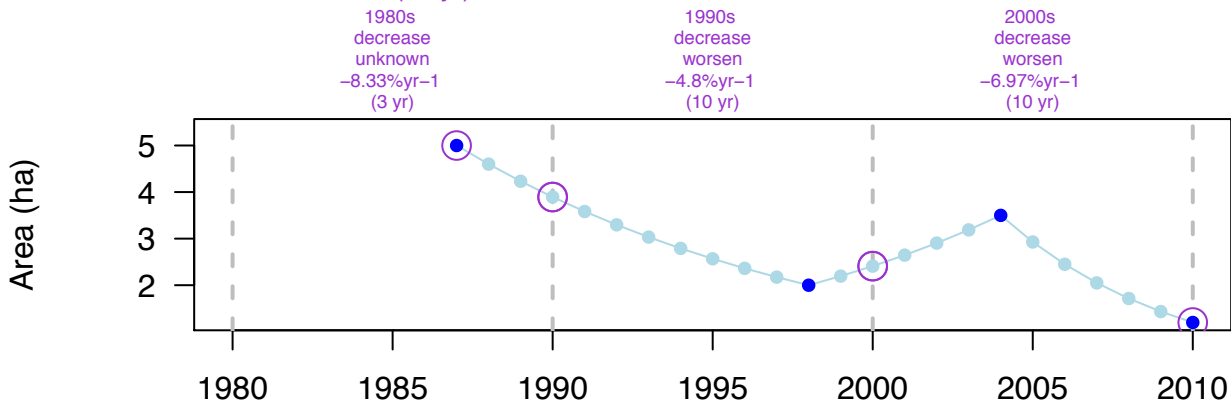

107\_lowerlimit

de Jong (unpublished)

SITE: Westerschelde Sloehaven (The Netherlands – Atlantic) – Zn (0.8 m)

OVERALL: Net = 0 m; Rate = 0 % yr<sup>-1</sup>; Perc Final = 100 % > no change

DECADAL: YES (23 yr)

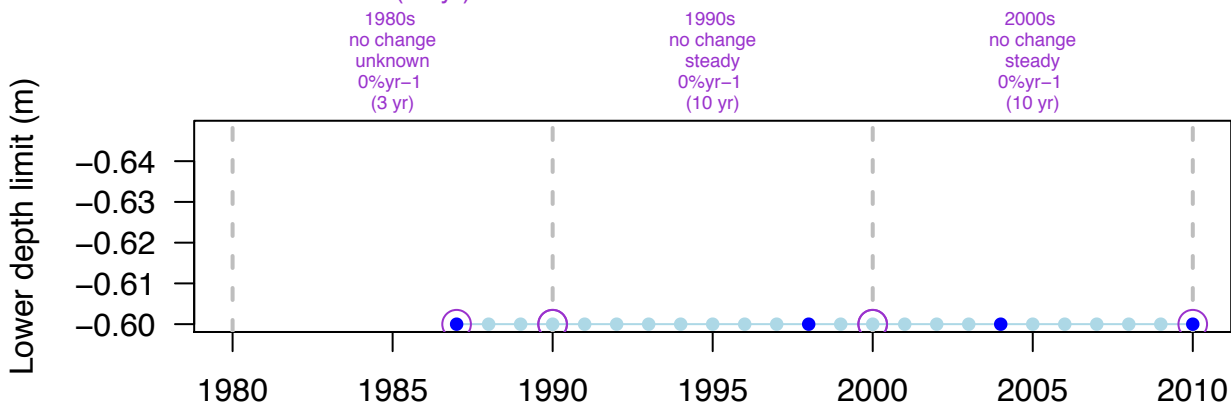

107\_upperlimit

de Jong (unpublished)

SITE: Westerschelde Sloehaven (The Netherlands – Atlantic) – Zn (0.8 m)

OVERALL: Net = 0 m; Rate = 0 % yr<sup>-1</sup>; Perc Final = 100 % > no change

DECADAL: YES (23 yr)

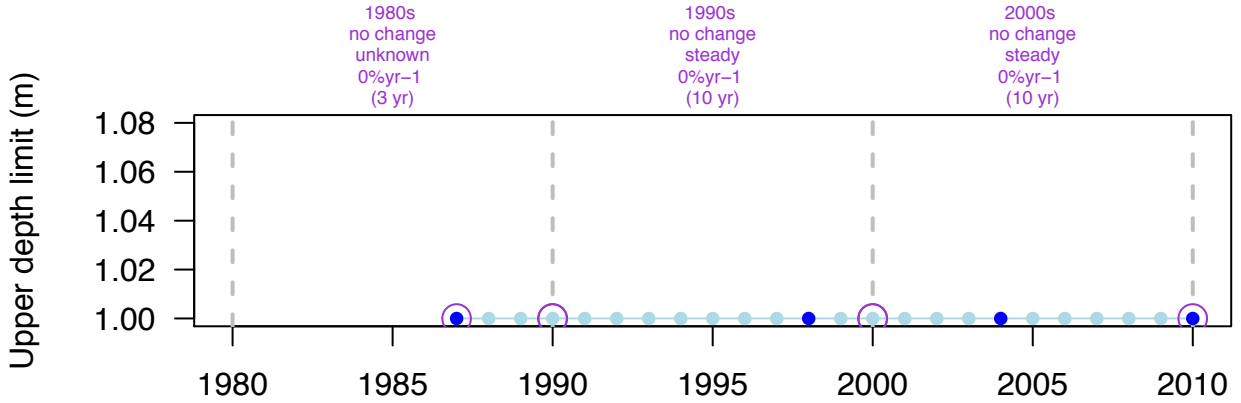

108\_area

de Jong (unpublished)

SITE: Voolhok (The Netherlands – Atlantic) – Zm (0 m)

OVERALL: Net = 4.1 ha; Rate = 36.09 % yr<sup>-1</sup>; Perc Final = 295 % > increase

DECADAL: NO (3 yr)

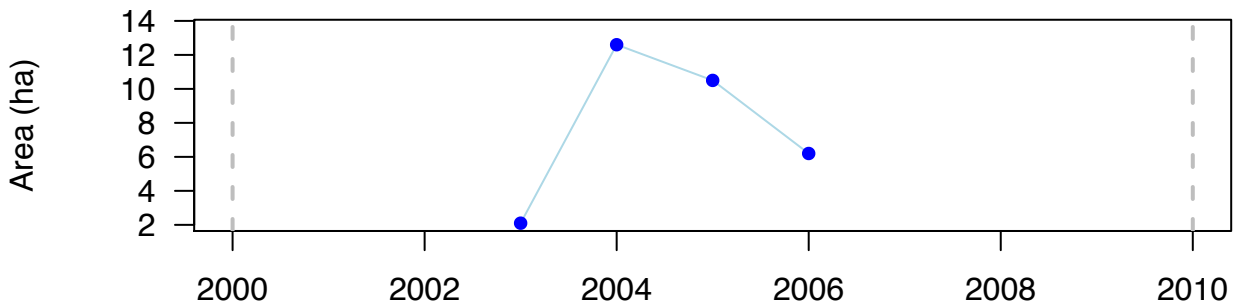



108\_lowerlimit

de Jong (unpublished)

SITE: Voolhok (The Netherlands – Atlantic) – Zm (0 m)

OVERALL: Net = 0 m; Rate = 0 % yr<sup>-1</sup>; Perc Final = 100 % > no change

DECADAL: NO (3 yr)

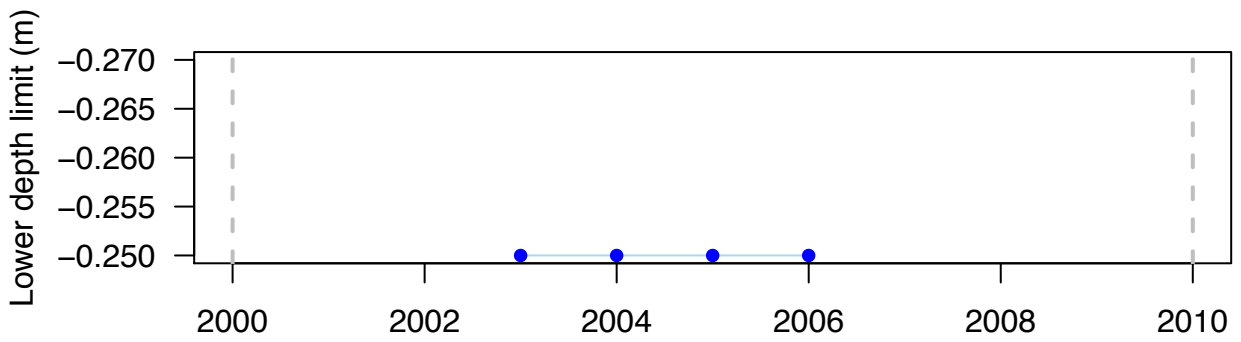

108\_upperlimit

de Jong (unpublished)

SITE: Voolhok (The Netherlands – Atlantic) – Zm (0 m)

OVERALL: Net = 0 m; Rate = 0 % yr<sup>-1</sup>; Perc Final = 100 % > no change

DECADAL: NO (3 yr)

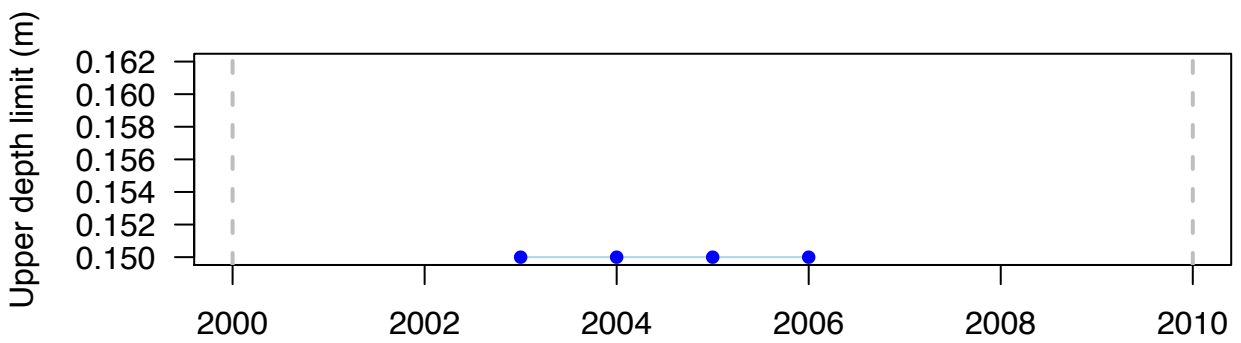

109\_abiomass

Nienhuis et al. 1996, Herman et al. 1996, de Jong (unpublished)

SITE: Lake Grevelingen (The Netherlands – Atlantic) – Zm (-2 m)

OVERALL: Net = -23.97 g dw m<sup>-2</sup>; Rate = -9.04 % yr<sup>-1</sup>; Perc Final = 16 % > decrease

DECADAL: YES (20 yr)

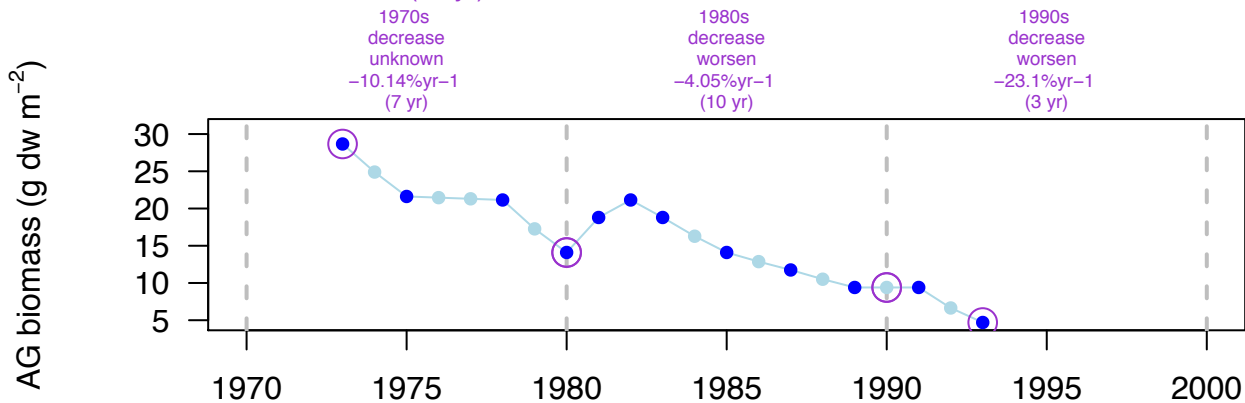

109\_area

Nienhuis et al. 1996, Herman et al. 1996, de Jong (unpublished)

SITE: Lake Grevelingen (The Netherlands – Atlantic) – Zm (-2 m)

OVERALL: Net = -1357.9 ha; Rate = NA % yr<sup>-1</sup>; Perc Final = NA % > decrease

DECADAL: YES (31 yr)

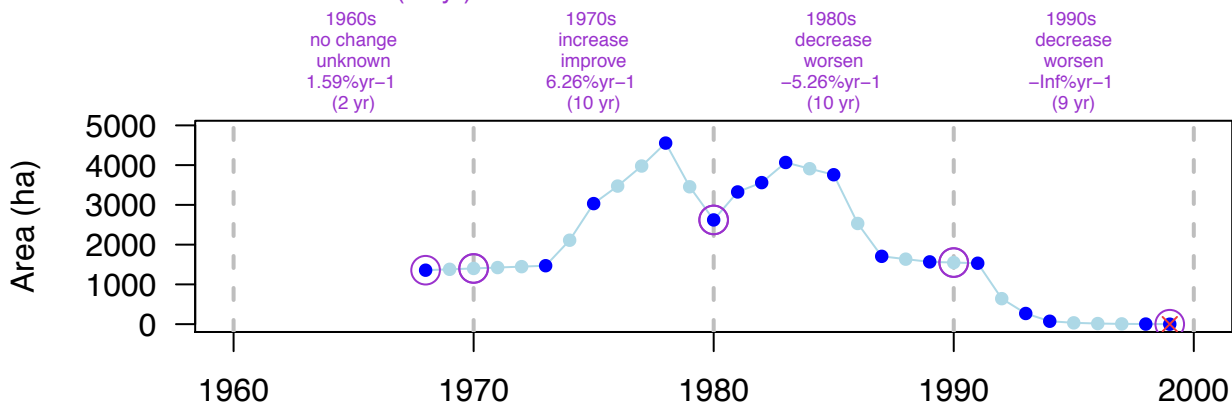

109\_lowerlimit

Nienhuis et al. 1996, Herman et al. 1996, de Jong (unpublished)

SITE: Lake Grevelingen (The Netherlands – Atlantic) – Zm (-2 m)

OVERALL: Net = NA m; Rate = NA % yr<sup>-1</sup>; Perc Final = NA % > decrease

DECADAL: YES (26 yr)

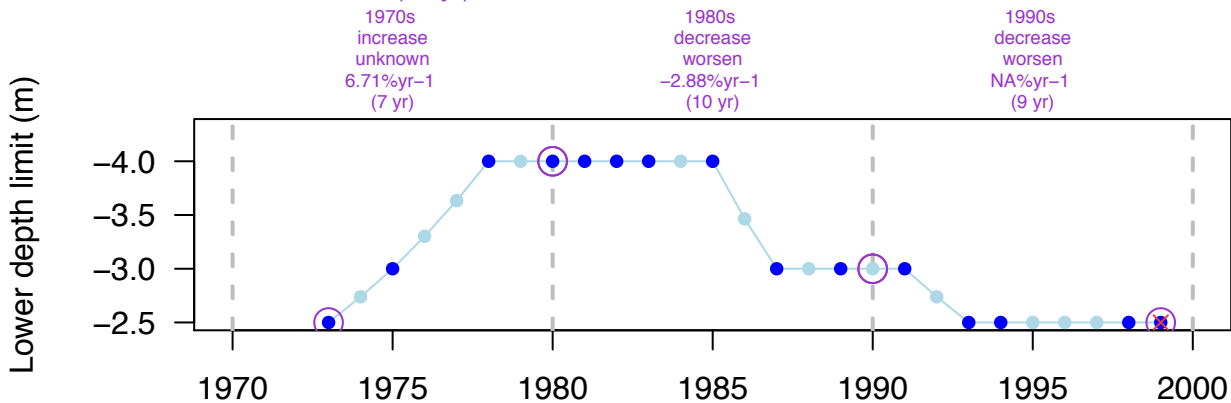

109\_upperlimit

Nienhuis et al. 1996, Herman et al. 1996, de Jong (unpublished)

SITE: Lake Grevelingen (The Netherlands – Atlantic) – Zm (-2 m)

OVERALL: Net = NA m; Rate = NA % yr<sup>-1</sup>; Perc Final = NA % > decrease

DECADAL: YES (26 yr)

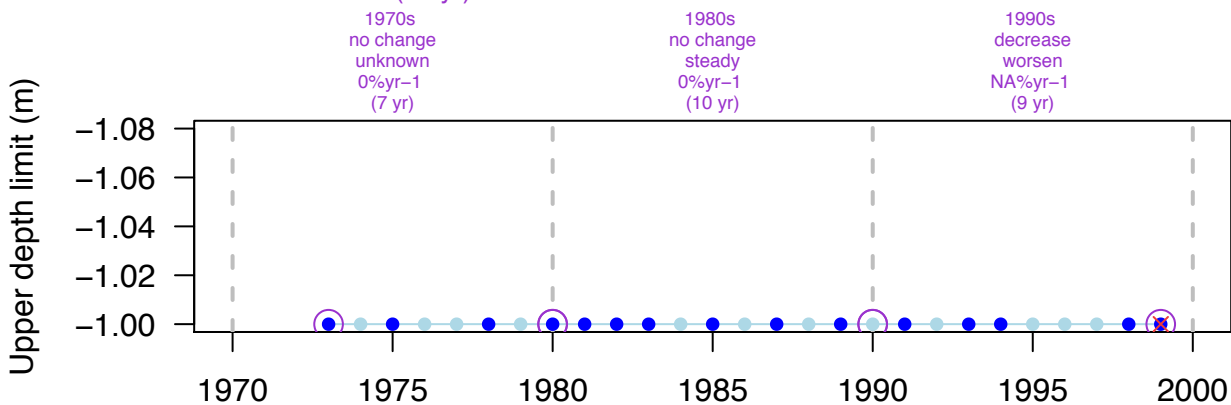

110\_area

Valle et al. 2013

SITE: Hond Paap (The Netherlands – Atlantic) – Zm (0 m)

OVERALL: Net = -13.1 ha; Rate = NA % yr<sup>-1</sup>; Perc Final = NA % > decrease

DECADAL: YES (20 yr)

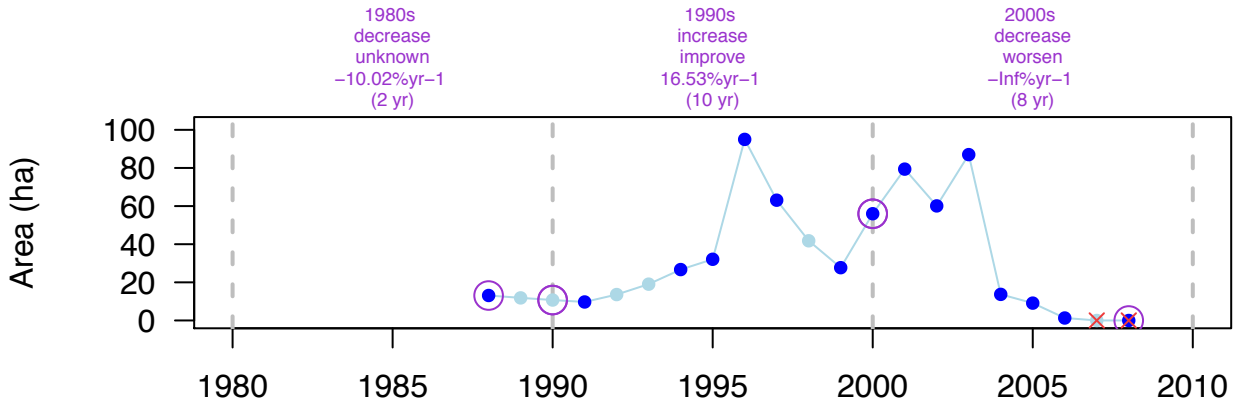

110\_lowerlimit

Valle et al. 2013

SITE: Hond Paap (The Netherlands – Atlantic) – Zm (0 m)

OVERALL: Net = NA m; Rate = NA % yr<sup>-1</sup>; Perc Final = NA % > decrease

DECADAL: YES (20 yr)

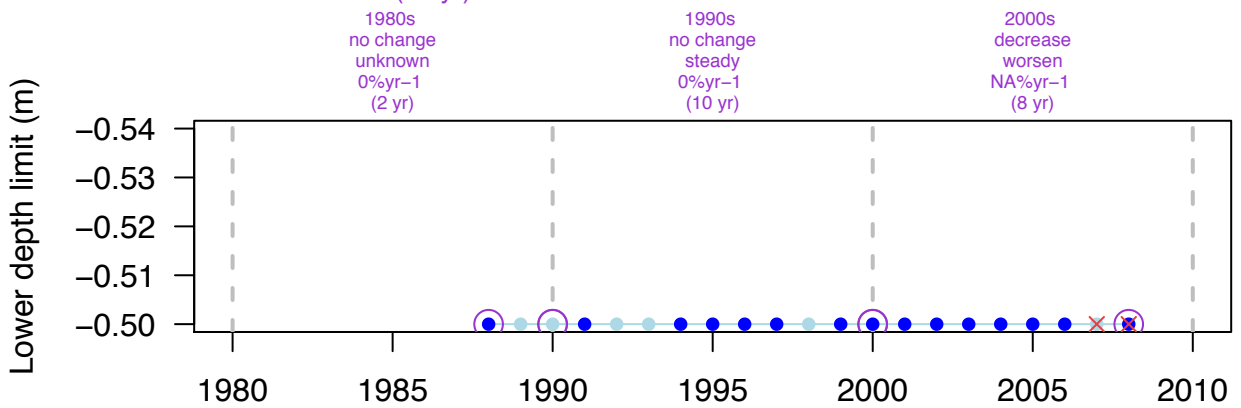

110\_upperlimit

Valle et al. 2013

SITE: Hond Paap (The Netherlands – Atlantic) – Zm (0 m)

OVERALL: Net = NA m; Rate = NA % yr<sup>-1</sup>; Perc Final = NA % > decrease

DECADAL: YES (20 yr)

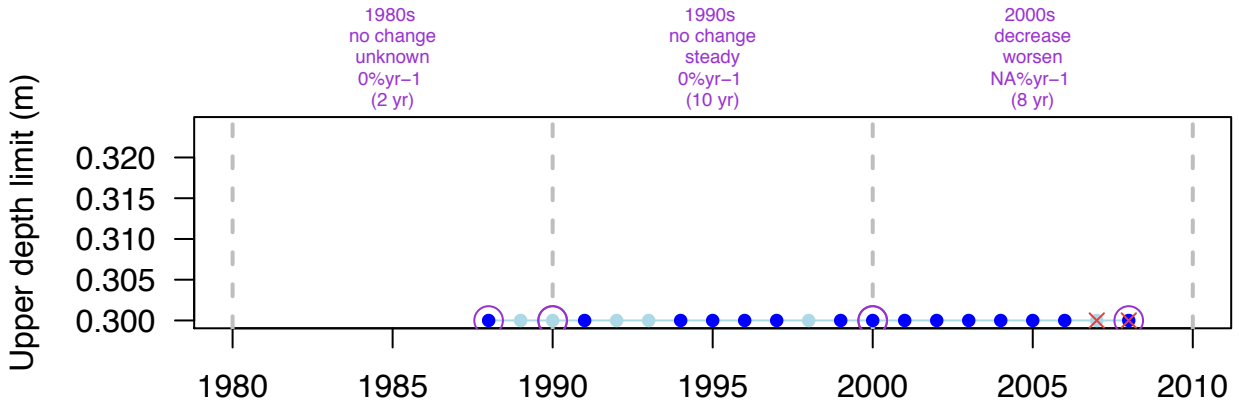

111\_area

van Katwijk et al. 2010

SITE: Terschelling Haven (The Netherlands – Atlantic) – Zm (-0.3 m)

OVERALL: Net = -8.2 ha; Rate = NA % yr<sup>-1</sup>; Perc Final = NA % > decrease

DECADAL: YES (13 yr)

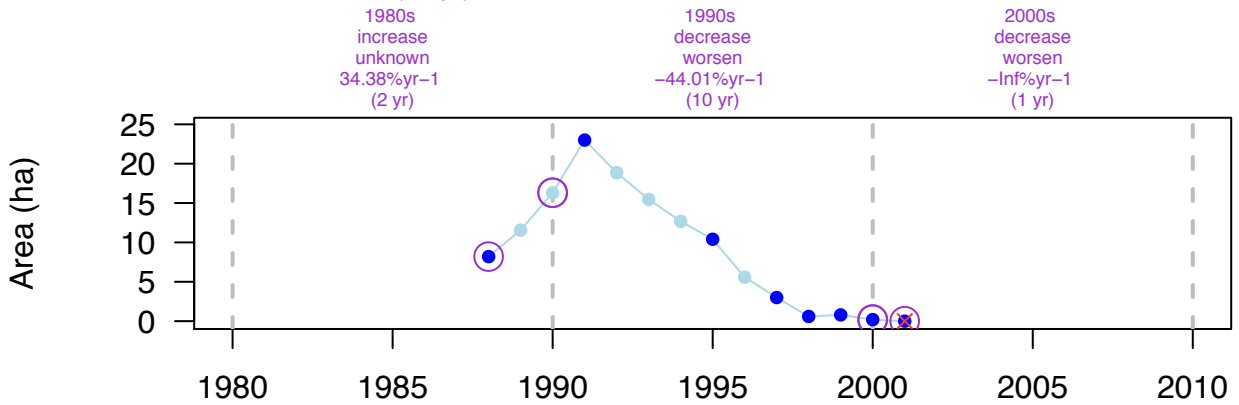

111\_lowerlimit

van Katwijk et al. 2010

SITE: Terschelling Haven (The Netherlands – Atlantic) – Zm (-0.3 m)

OVERALL: Net = NA m; Rate = NA % yr<sup>-1</sup>; Perc Final = NA % > decrease

DECADAL: YES (13 yr)

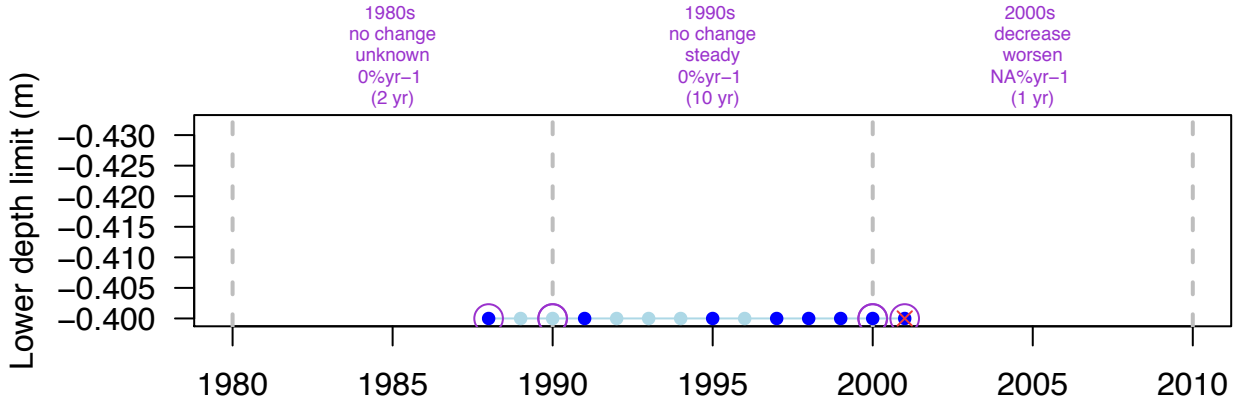

111\_upperlimit

van Katwijk et al. 2010

SITE: Terschelling Haven (The Netherlands – Atlantic) – Zm (-0.3 m)

OVERALL: Net = NA m; Rate = NA % yr<sup>-1</sup>; Perc Final = NA % > decrease

DECADAL: YES (13 yr)

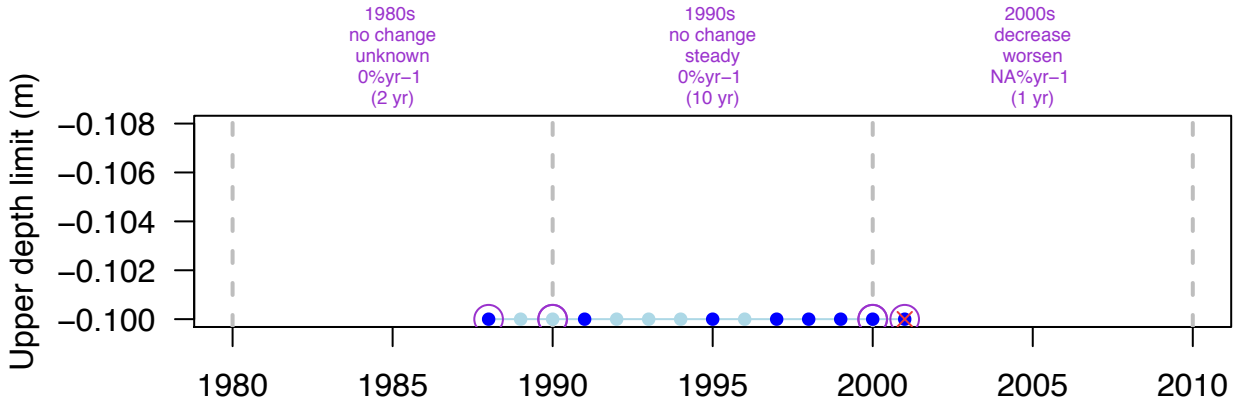

### 112\_area

Polderman and den Hartog 1975, Braster and Carrière 1976, de Jong (unpublished)

SITE: Terschelling Hoorn (The Netherlands – Atlantic) – Zn (0.1 m)

OVERALL: Net = -11.2 ha; Rate = -3.38 % yr<sup>-1</sup>; Perc Final = 32 % > decrease

DECADAL: YES (34 yr)

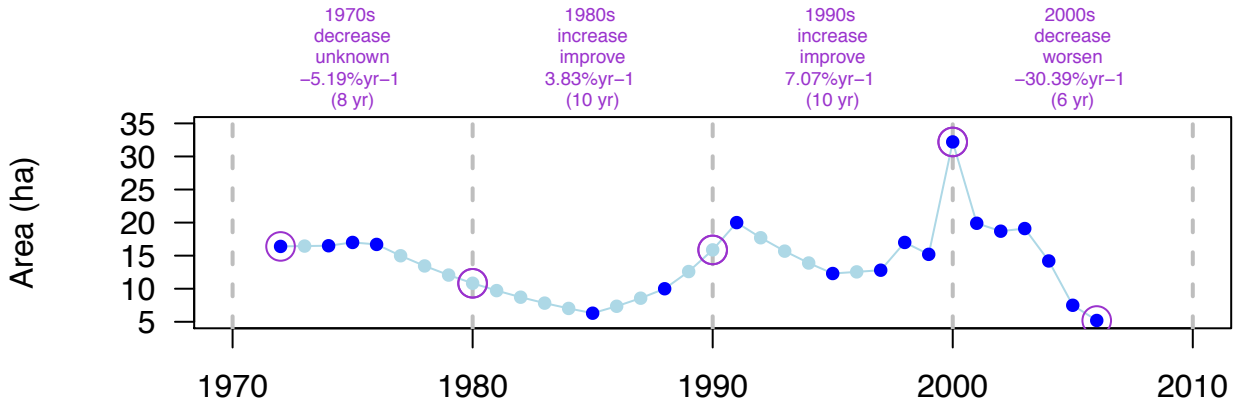

### 112\_lowerlimit

Polderman and den Hartog 1975, Braster and Carrière 1976, de Jong (unpublished)

SITE: Terschelling Hoorn (The Netherlands – Atlantic) – Zn (0.1 m)

OVERALL: Net = 0 m; Rate = 0 % yr<sup>-1</sup>; Perc Final = 100 % > no change

DECADAL: YES (34 yr)

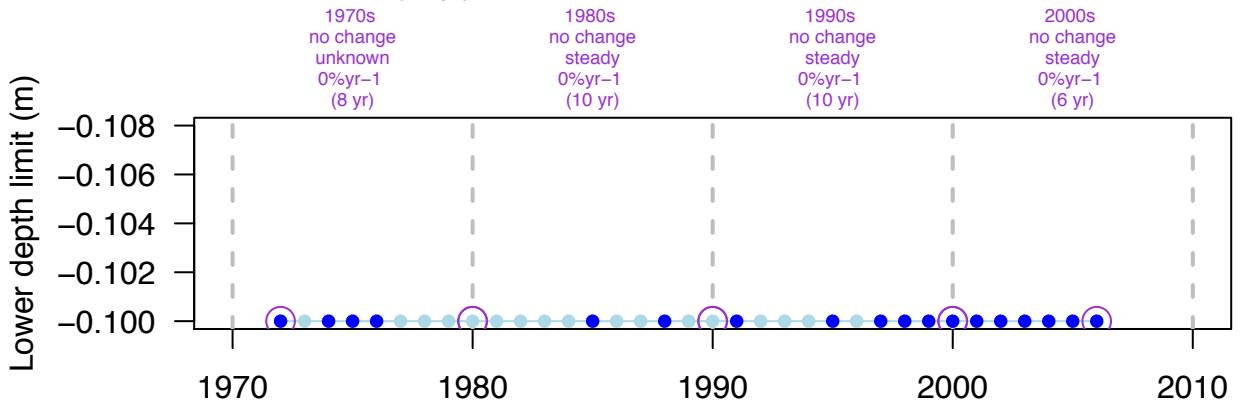

112\_upperlimit

Polderman and den Hartog 1975, Braster and Carrière 1976, de Jong (unpublished)

SITE: Terschelling Hoorn (The Netherlands – Atlantic) – Zn (0.1 m)

OVERALL: Net = 0 m; Rate = 0 % yr<sup>-1</sup>; Perc Final = 100 % > no change

DECADAL: YES (34 yr)

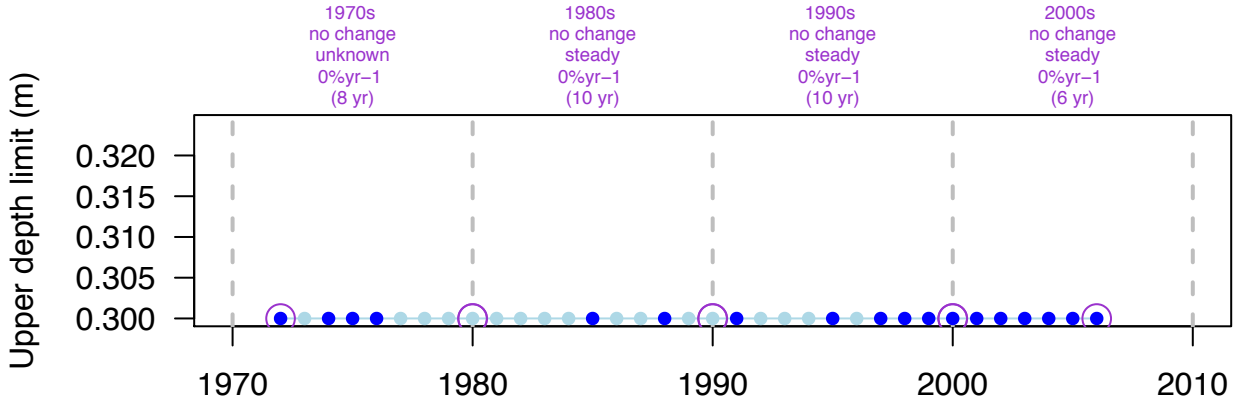

113\_density

Marbà and Duarte 2010, Duarte and Marbà (unpublished)

SITE: El Castell (Spain – Mediterranean) – Po (-15 m)

OVERALL: Net = -262.5 shoot m<sup>-2</sup>; Rate = -8.33 % yr<sup>-1</sup>; Perc Final = 40 % > decrease

DECADAL: YES (11 yr)

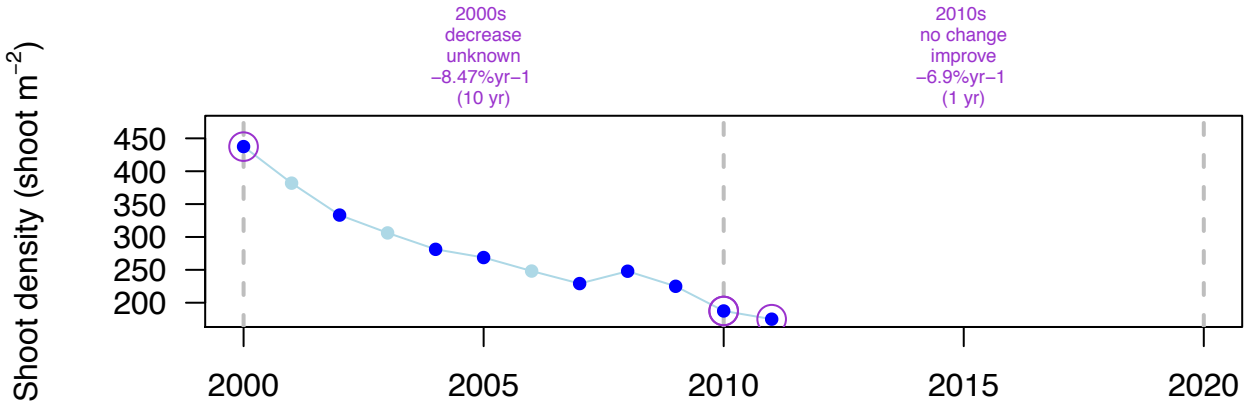



114\_area

de Jong (unpublished)

SITE: Terschelling Keeg Ans (The Netherlands – Atlantic) – Zn (0.1 m)

OVERALL: Net = -2.7 ha; Rate = NA % yr<sup>-1</sup>; Perc Final = NA % > decrease

DECADAL: NO (5 yr)

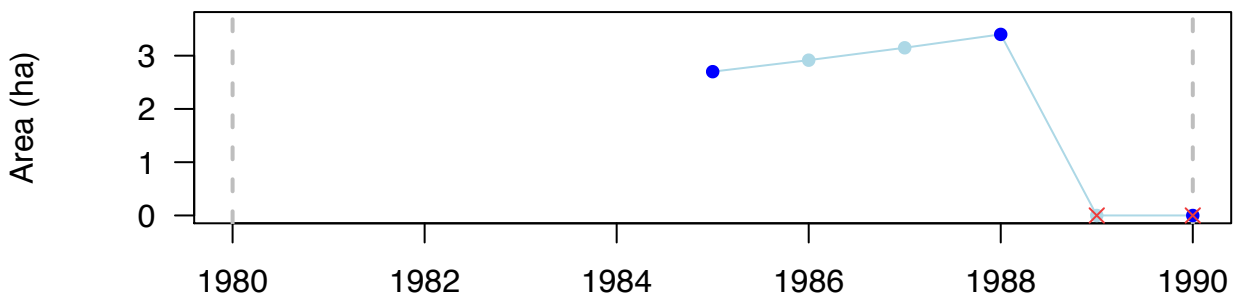

114\_lowerlimit

de Jong (unpublished)

SITE: Terschelling Keeg Ans (The Netherlands – Atlantic) – Zn (0.1 m)

OVERALL: Net = NA m; Rate = NA % yr<sup>-1</sup>; Perc Final = NA % > decrease

DECADAL: NO (5 yr)

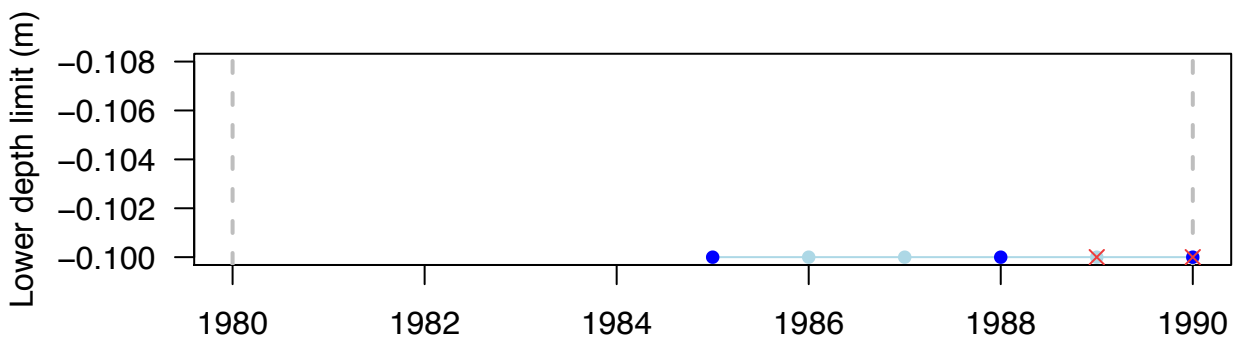

114\_upperlimit

de Jong (unpublished)

SITE: Terschelling Keeg Ans (The Netherlands – Atlantic) – Zn (0.1 m)

OVERALL: Net = NA m; Rate = NA % yr<sup>-1</sup>; Perc Final = NA % > decrease

DECADAL: NO (5 yr)

Upper depth limit (m)

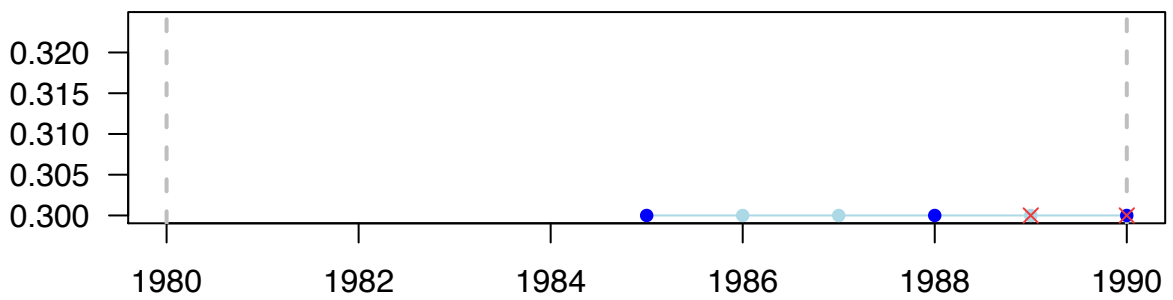

115\_density

Marbà and Duarte 2010, Duarte and Marbà (unpublished)

SITE: El Castell (Spain – Mediterranean) – Po (–10 m)

OVERALL: Net = –362.5 shoot m<sup>-2</sup>; Rate = –10.27 % yr<sup>-1</sup>; Perc Final = 32 % > decrease

DECADAL: YES (11 yr)

Shoot density (shoot m<sup>-2</sup>)

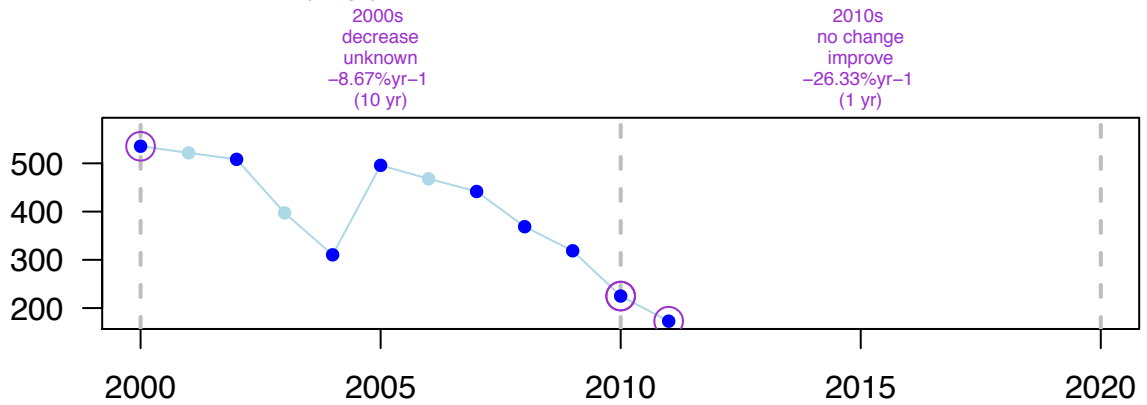

116\_biomass

Peralta et al. (unpublished)

SITE: Santibañez (Spain – Atlantic) – Cn (-0.1 m)

OVERALL: Net = 0.73 g dw m<sup>-2</sup>; Rate = 0.03 % yr<sup>-1</sup>; Perc Final = 100 % > no change

DECADAL: NO (7 yr)

Total biomass (g dw m<sup>-2</sup>)

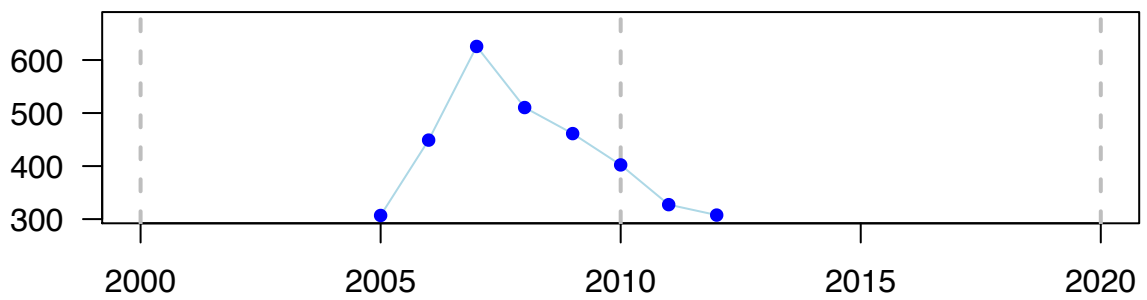

116\_density

Peralta et al. (unpublished)

SITE: Santibañez (Spain – Atlantic) – Cn (-0.1 m)

OVERALL: Net = 537.5 shoot m<sup>-2</sup>; Rate = 9.76 % yr<sup>-1</sup>; Perc Final = 180 % > increase

DECADAL: NO (6 yr)

Shoot density (shoot m<sup>-2</sup>)

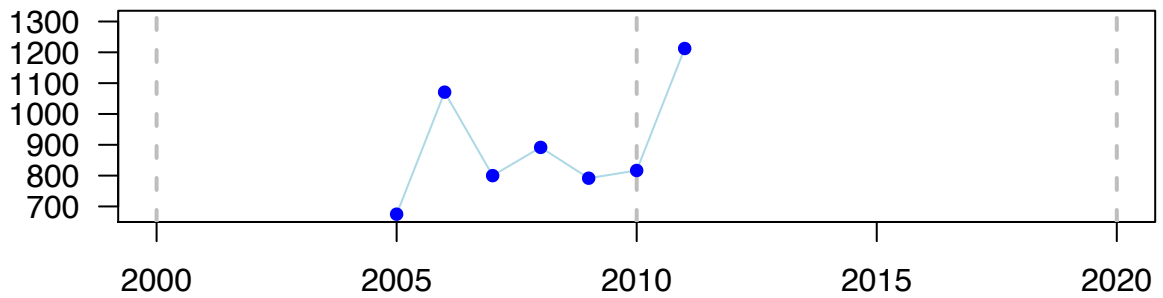

117\_biomass

Peralta et al. (unpublished)

SITE: Santibañez (Spain – Atlantic) – Cn (–0.5 m)

OVERALL: Net = –90.12 g dw m<sup>-2</sup>; Rate = –3.88 % yr<sup>-1</sup>; Perc Final = 76 % > no change

DECADAL: NO (7 yr)

Total biomass (g dw m<sup>-2</sup>)

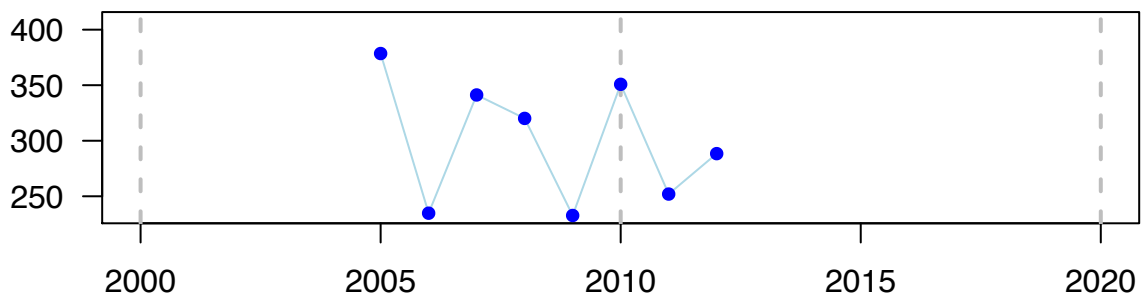

117\_density

Peralta et al. (unpublished)

SITE: Santibañez (Spain – Atlantic) – Cn (–0.5 m)

OVERALL: Net = –168.75 shoot m<sup>-2</sup>; Rate = –6.19 % yr<sup>-1</sup>; Perc Final = 69 % > decrease

DECADAL: NO (6 yr)

Shoot density (shoot m<sup>-2</sup>)

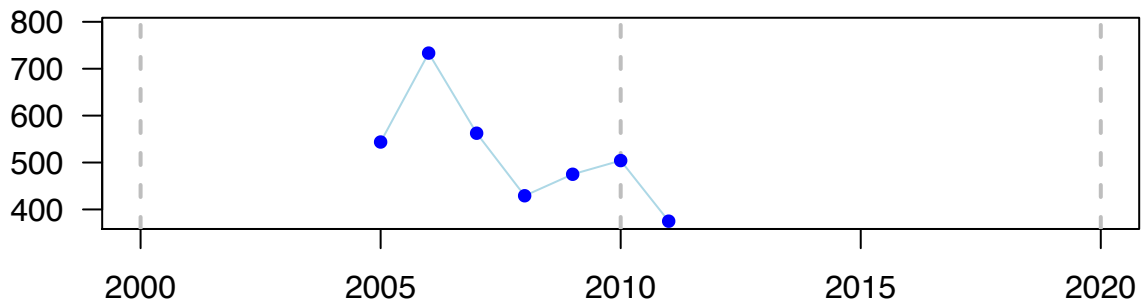

118\_biomass

Peralta et al. (unpublished)

SITE: Santibañez (Spain – Atlantic) – Cn (0.4 m)

OVERALL: Net =  $-77.88 \text{ g dw m}^{-2}$ ; Rate =  $-3.2 \text{ \% yr}^{-1}$ ; Perc Final = 80 % > no change

DECADAL: NO (7 yr)

Total biomass ( $\text{g dw m}^{-2}$ )

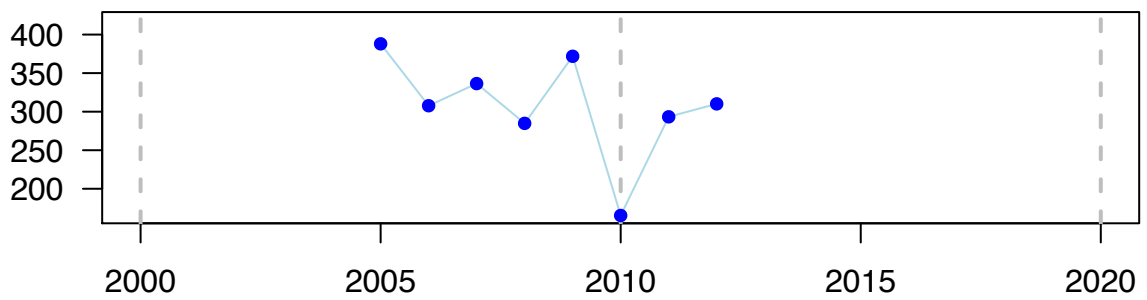

118\_density

Peralta et al. (unpublished)

SITE: Santibañez (Spain – Atlantic) – Cn (0.4 m)

OVERALL: Net =  $1289.58 \text{ shoot m}^{-2}$ ; Rate =  $13.75 \text{ \% yr}^{-1}$ ; Perc Final = 228 % > increase

DECADAL: NO (6 yr)

Shoot density ( $\text{shoot m}^{-2}$ )

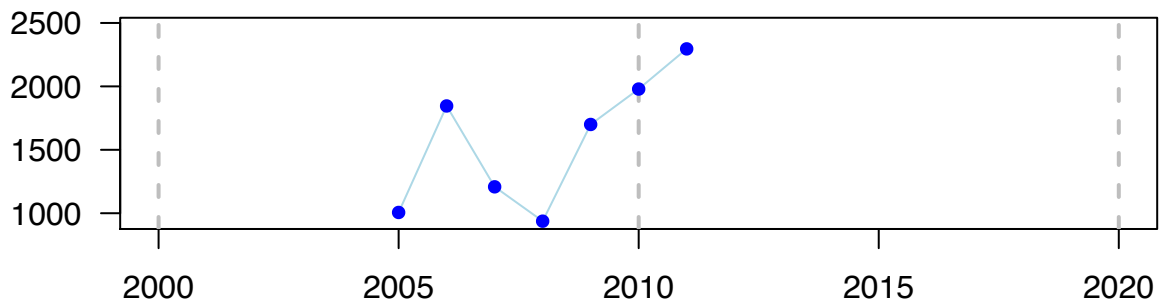

119\_area

del Rei 2009

SITE: Inner Cádiz Bay (Spain – Atlantic) – Zn (? m)

OVERALL: Net = 38.1 ha; Rate = 3.58 % yr<sup>-1</sup>; Perc Final = 107 % > no change

DECADAL: NO (2 yr)

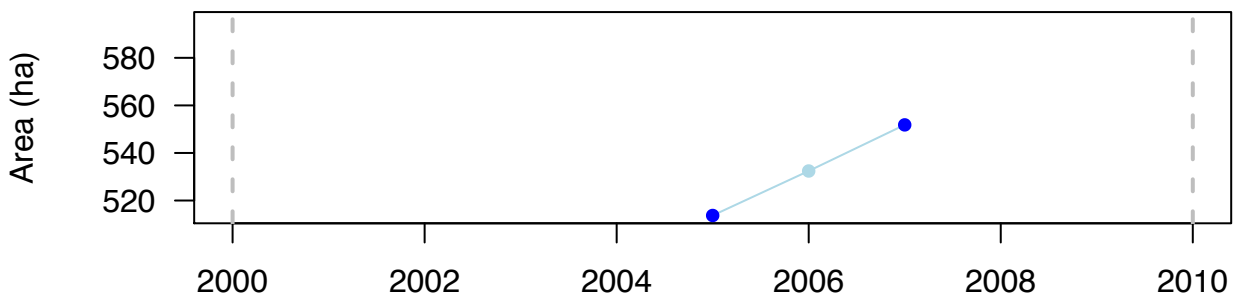

120\_area

Muñoz-Ramos and Seglar (unpublished)

SITE: Mataró (Spain – Mediterranean) – Po (-16.2 m)

OVERALL: Net = -188.4 ha; Rate = -4.72 % yr<sup>-1</sup>; Perc Final = 69 % > decrease

DECADAL: YES (8 yr)

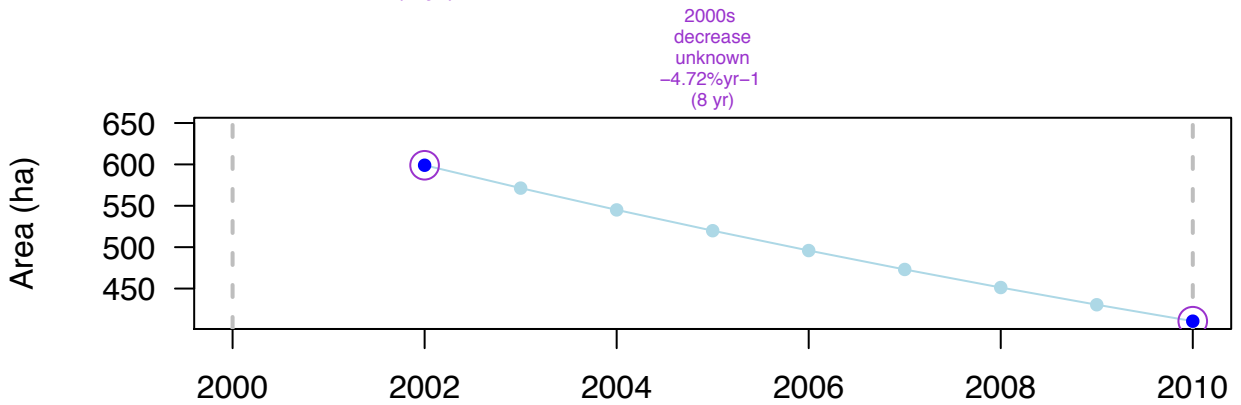

121\_area

Muñoz-Ramos and Seglar (unpublished)

SITE: Mataró (Spain – Mediterranean) – Cn (-16.2 m)

OVERALL: Net = -118 ha; Rate = -27.28 % yr<sup>-1</sup>; Perc Final = 11 % > decrease

DECADAL: YES (8 yr)

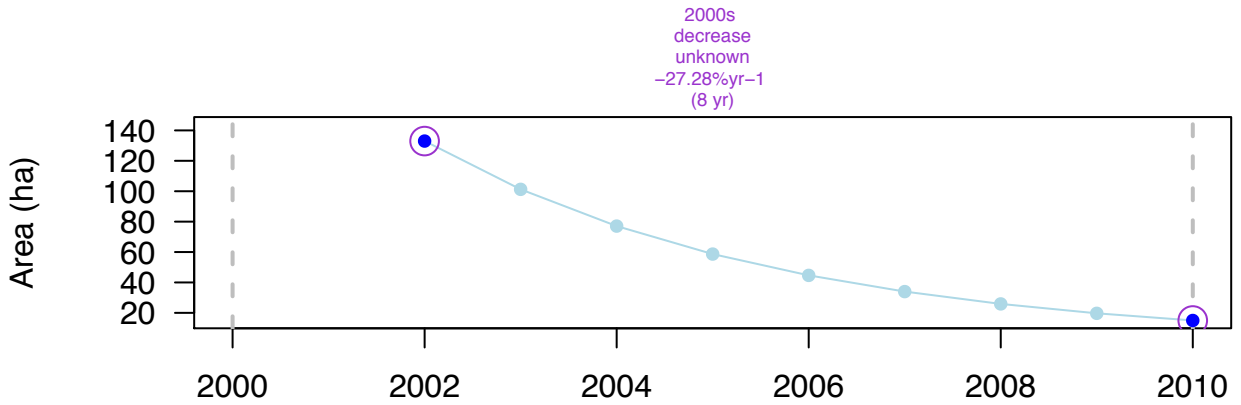

122\_cover

Muñoz-Ramos and Seglar 2015

SITE: Estació Mataró I (Spain – Mediterranean) – Po (-12.5 m)

OVERALL: Net = -8.2 %; Rate = -1.33 % yr<sup>-1</sup>; Perc Final = 79 % > no change

DECADAL: YES (18 yr)

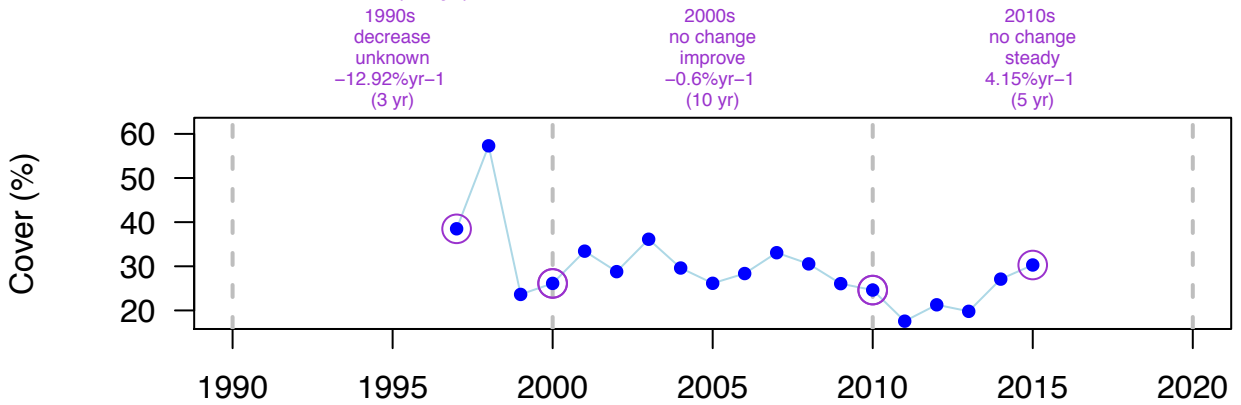

122\_density

Muñoz-Ramos and Seglar 2015

SITE: Estació Mataró I (Spain – Mediterranean) – Po (-12.5 m)

OVERALL: Net = 116.65 shoot m<sup>-2</sup>; Rate = 1.64 % yr<sup>-1</sup>; Perc Final = 134 % > increase

DECADAL: YES (18 yr)

Shoot density (shoot m<sup>-2</sup>)

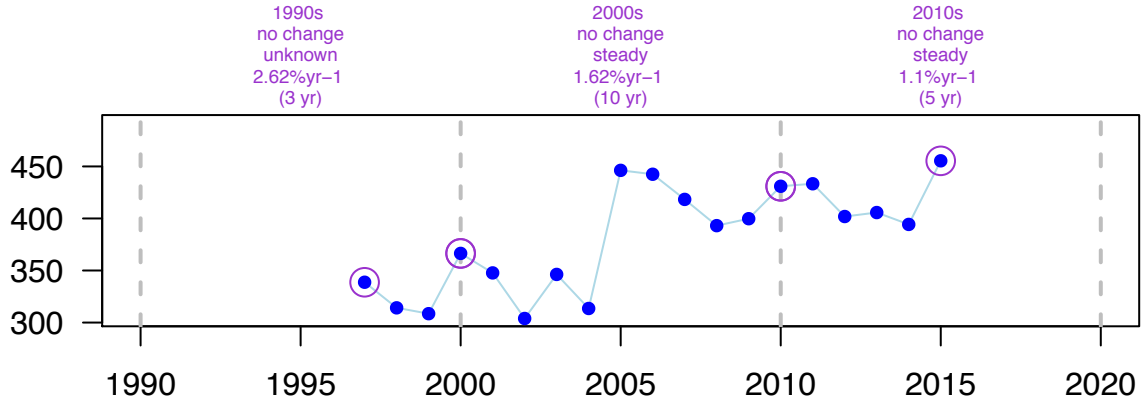

123\_cover

Muñoz-Ramos and Seglar 2015

SITE: Estació Mataró III (Spain – Mediterranean) – Po (-17 m)

OVERALL: Net = 13.01 %; Rate = 8.44 % yr<sup>-1</sup>; Perc Final = 152 % > increase

DECADAL: NO (5 yr)

Cover (%)

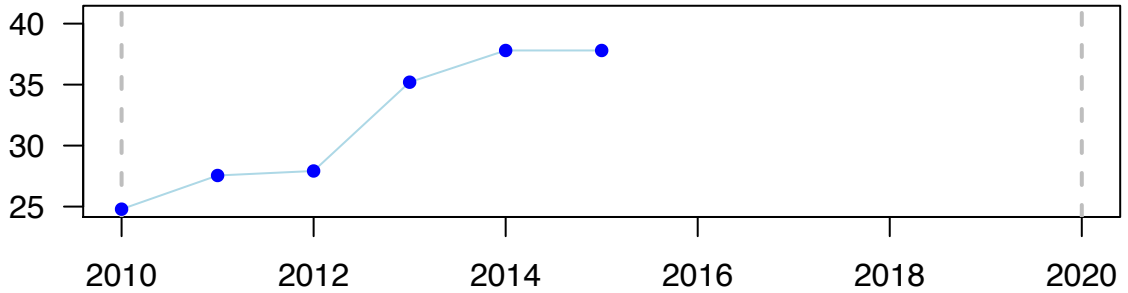



123\_density

Muñoz-Ramos and Seglar 2015

SITE: Estació Mataró III (Spain – Mediterranean) – Po (-17 m)

OVERALL: Net = 10.79 shoot m<sup>-2</sup>; Rate = 0.77 % yr<sup>-1</sup>; Perc Final = 104 % > no change

DECADAL: NO (5 yr)

Shoot density (shoot m<sup>-2</sup>)

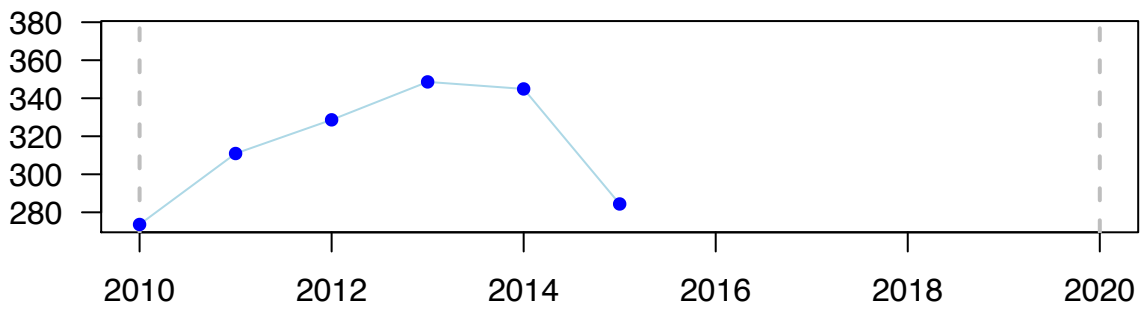

124\_cover

Muñoz-Ramos and Seglar 2015

SITE: Estació Mataró III (Spain – Mediterranean) – Po (-19 m)

OVERALL: Net = -2.82 %; Rate = -0.46 % yr<sup>-1</sup>; Perc Final = 92 % > no change

DECADAL: YES (17 yr)

Cover (%)

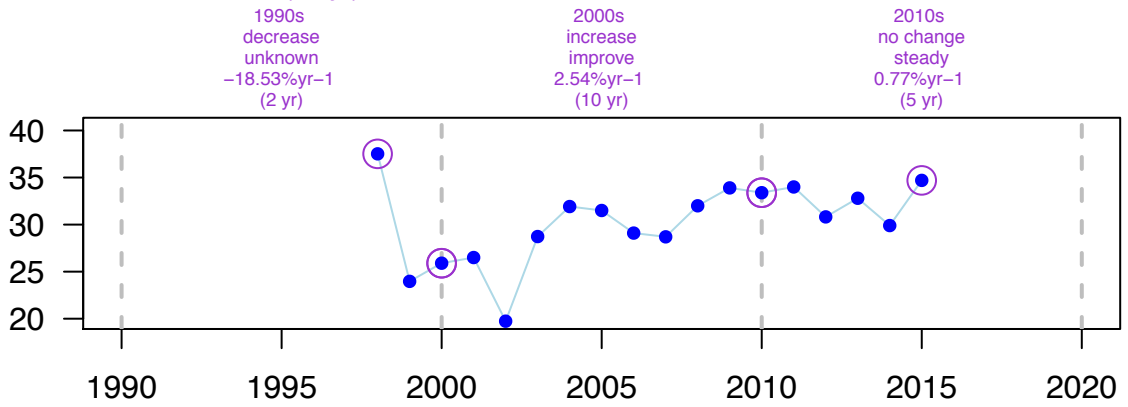

124\_density

Muñoz-Ramos and Seglar 2015

SITE: Estació Mataró III (Spain – Mediterranean) – Po (-19 m)

OVERALL: Net = -51.5 shoot m<sup>-2</sup>; Rate = -1.4 % yr<sup>-1</sup>; Perc Final = 80 % > no change

DECADAL: YES (16 yr)

Shoot density (shoot m<sup>-2</sup>)

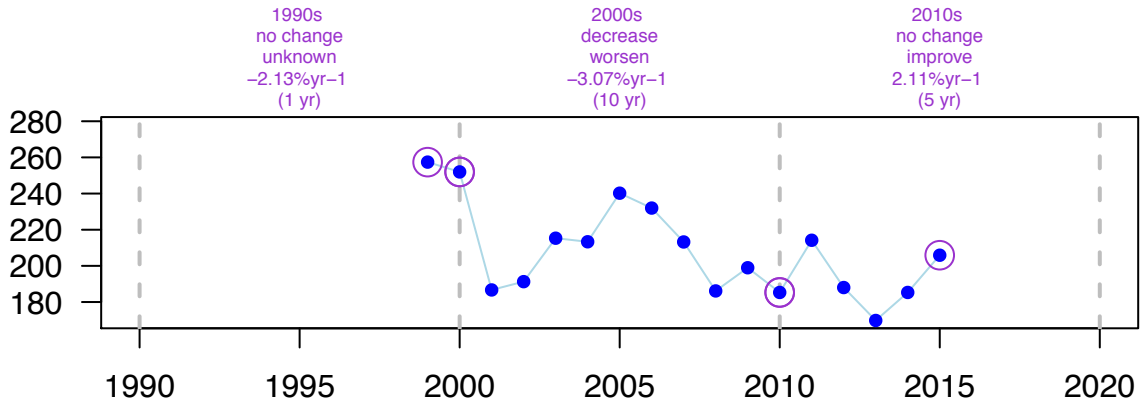

125\_density

Roca et al. 2014

SITE: Marimurtra (control) (Spain – Mediterranean) – Po (-13 m)

OVERALL: Net = 10.42 shoot m<sup>-2</sup>; Rate = 1.64 % yr<sup>-1</sup>; Perc Final = 103 % > no change

DECADAL: NO (2 yr)

Shoot density (shoot m<sup>-2</sup>)

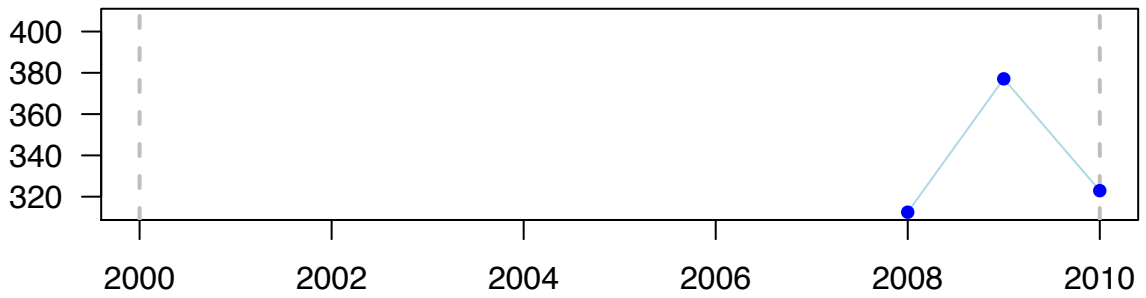

126\_density

Roca et al. 2014

SITE: Port Blanes (impacted) (Spain – Mediterranean) – Po (–14 m)

OVERALL: Net = –152.09 shoot m<sup>-2</sup>; Rate = –26.79 % yr<sup>-1</sup>; Perc Final = 59 % > decrease

DECADAL: NO (2 yr)

Shoot density (shoot m<sup>-2</sup>)

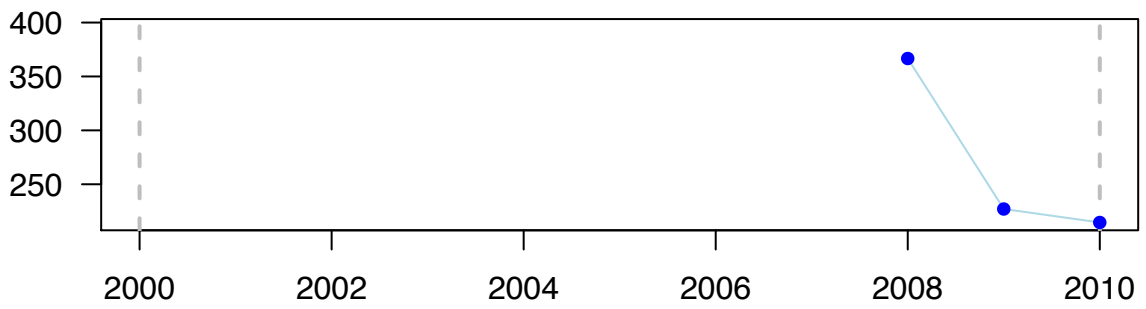

127\_area

Mascaró 2011

SITE: Alfacs Bay (Spain – Mediterranean) – Cn (–1 m)

OVERALL: Net = 304 ha; Rate = NA % yr<sup>-1</sup>; Perc Final = NA % > increase

DECADAL: YES (39 yr)

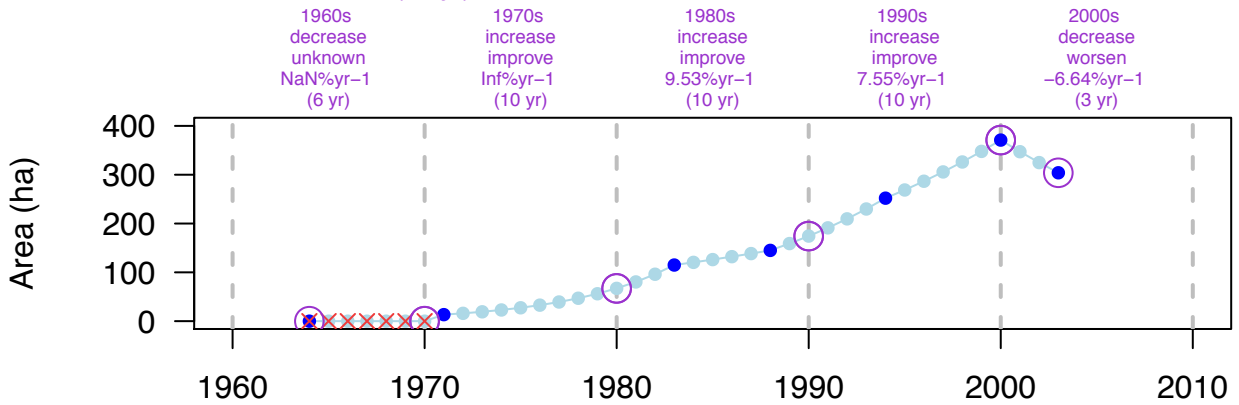

128\_area

Mascaró 2011

SITE: Fangar Bay (Spain – Mediterranean) – Cn (-1 m)

OVERALL: Net = 49 ha; Rate = NA % yr<sup>-1</sup>; Perc Final = NA % > increase

DECADAL: YES (36 yr)

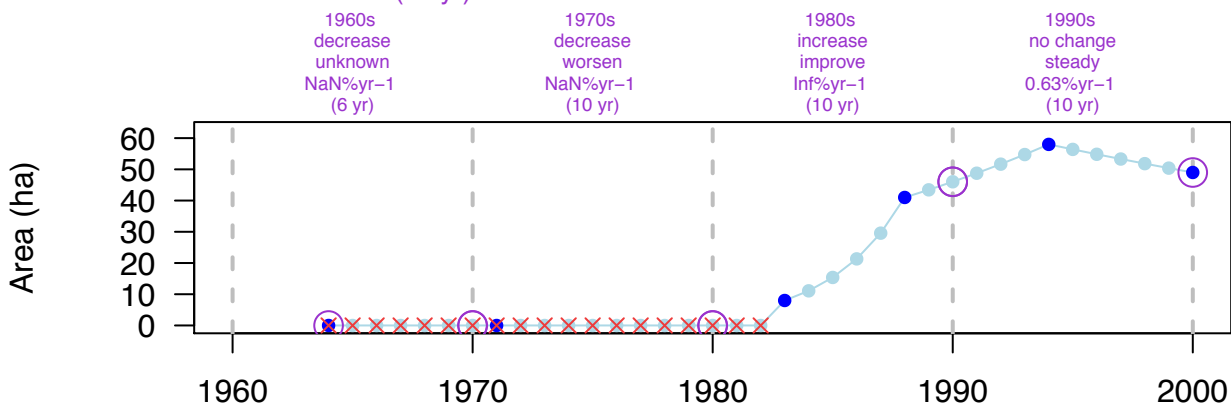

129\_biomass

Romero et al. 2010 (b)

SITE: Alfacs (eutrophic) (Spain – Mediterranean) – Cn (-1 m)

OVERALL: Net = 20.5 g dw m<sup>-2</sup>; Rate = 2.1 % yr<sup>-1</sup>; Perc Final = 111 % > no change

DECADAL: NO (5 yr)

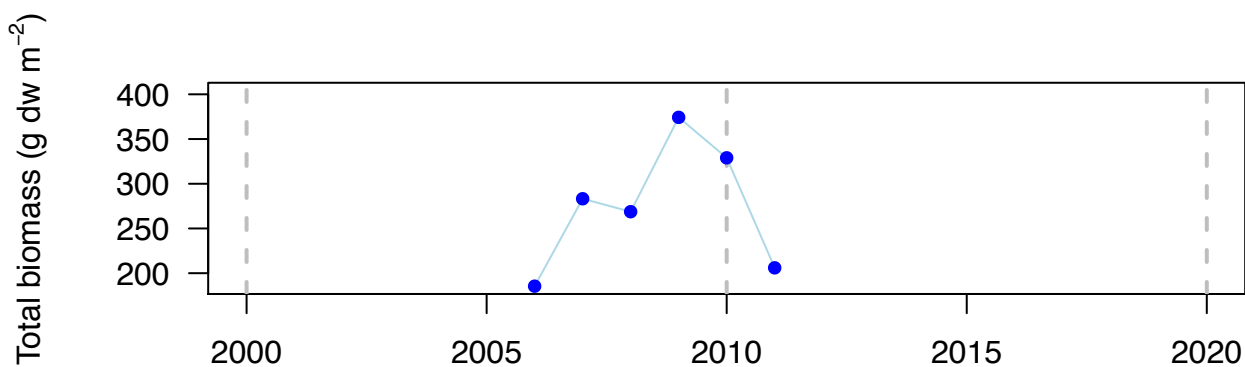

129\_density

Romero et al. 2010 (b)

SITE: Alfacs (eutrophic) (Spain – Mediterranean) – Cn (-1 m)

OVERALL: Net = -1227.75 shoot m<sup>-2</sup>; Rate = -13.61 % yr<sup>-1</sup>; Perc Final = 51 % > decrease

DECADAL: NO (5 yr)

Shoot density (shoot m<sup>-2</sup>)

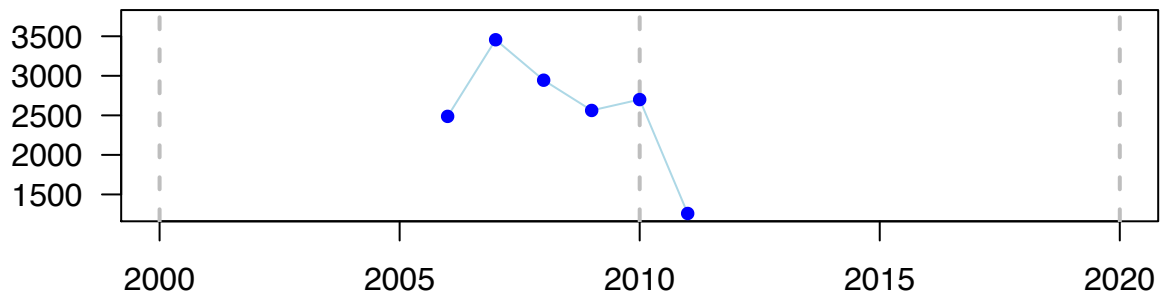

130\_biomass

Romero et al. 2010 (b)

SITE: Alfacs (marine) (Spain – Mediterranean) – Cn (-1 m)

OVERALL: Net = -26 g dw m<sup>-2</sup>; Rate = -2.8 % yr<sup>-1</sup>; Perc Final = 87 % > no change

DECADAL: NO (5 yr)

Total biomass (g dw m<sup>-2</sup>)

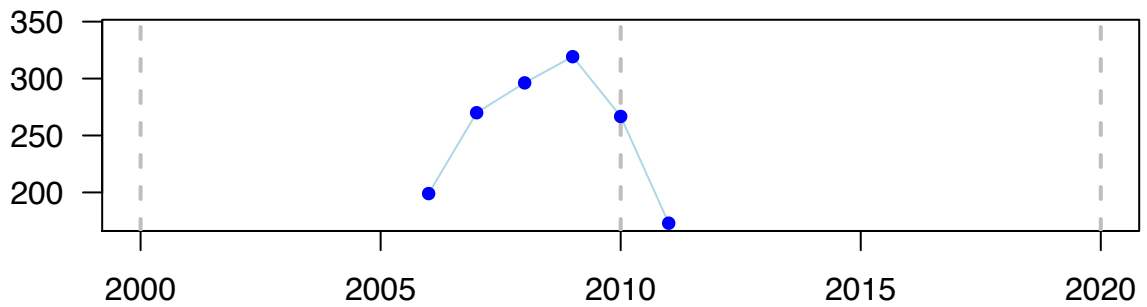

130\_density

Romero et al. 2010 (b)

SITE: Alfacs (marine) (Spain – Mediterranean) – Cn (-1 m)

OVERALL: Net = -1763.32 shoot m<sup>-2</sup>; Rate = -14.18 % yr<sup>-1</sup>; Perc Final = 49 % > decrease

DECADAL: NO (5 yr)

Shoot density (shoot m<sup>-2</sup>)

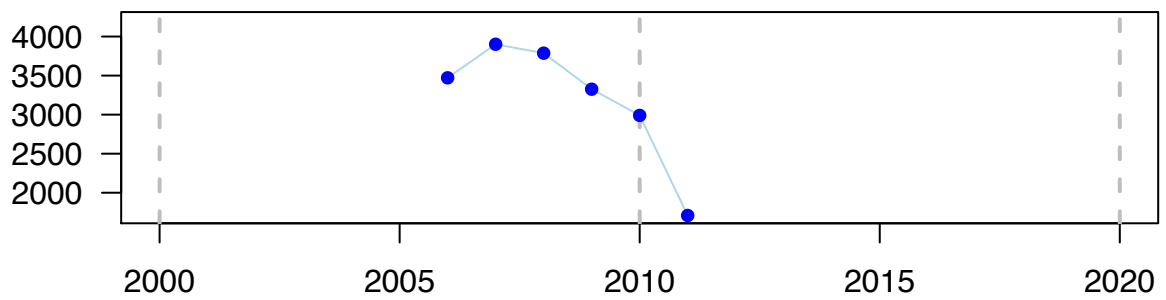

131\_biomass

Romero et al. 2010 (b)

SITE: Fangar (eutrophic) (Spain – Mediterranean) – Cn (-1 m)

OVERALL: Net = 112.17 g dw m<sup>-2</sup>; Rate = 9.34 % yr<sup>-1</sup>; Perc Final = 160 % > increase

DECADAL: NO (5 yr)

Total biomass (g dw m<sup>-2</sup>)

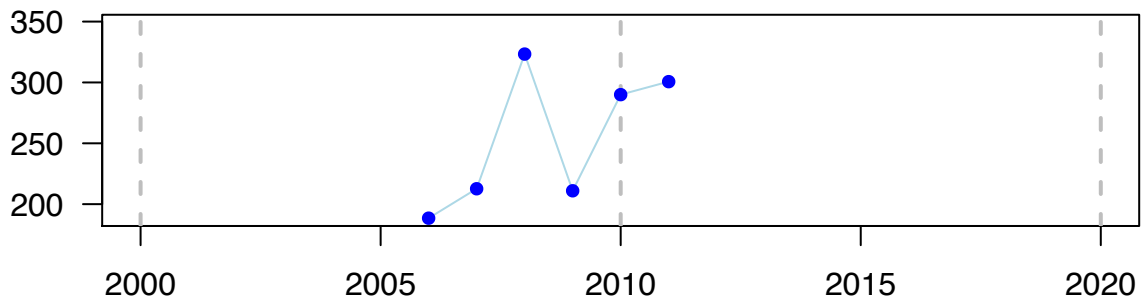

131\_density

Romero et al. 2010 (b)

SITE: Fangar (eutrophic) (Spain – Mediterranean) – Cn (-1 m)

OVERALL: Net = 1914.35 shoot m<sup>-2</sup>; Rate = 18.59 % yr<sup>-1</sup>; Perc Final = 253 % > increase

DECADAL: NO (5 yr)

Shoot density (shoot m<sup>-2</sup>)

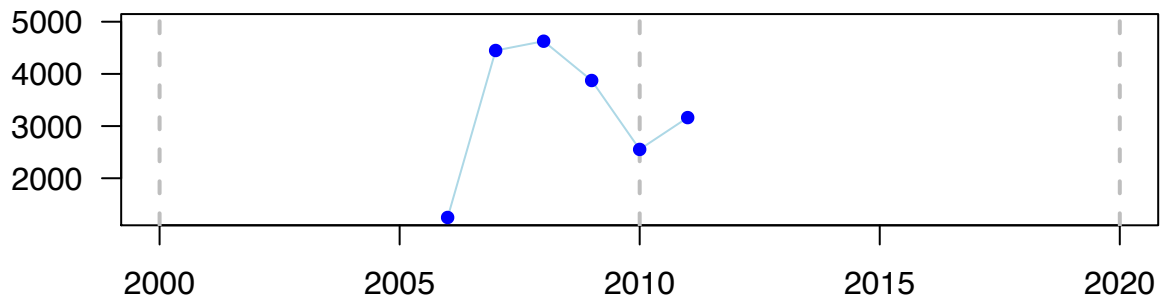

132\_biomass

Romero et al. 2010 (b)

SITE: Fangar (marine) (Spain – Mediterranean) – Cn (-1 m)

OVERALL: Net = 159.5 g dw m<sup>-2</sup>; Rate = 11.86 % yr<sup>-1</sup>; Perc Final = 181 % > increase

DECADAL: NO (5 yr)

Total biomass (g dw m<sup>-2</sup>)

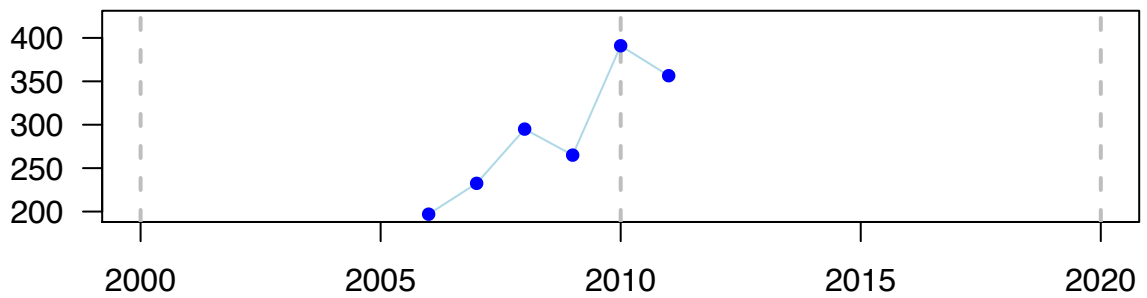

132\_density

Romero et al. 2010 (b)

SITE: Fangar (marine) (Spain – Mediterranean) – Cn (-1 m)

OVERALL: Net = -833.24 shoot m<sup>-2</sup>; Rate = -4.97 % yr<sup>-1</sup>; Perc Final = 78 % > no change

DECADAL: NO (5 yr)

Shoot density (shoot m<sup>-2</sup>)

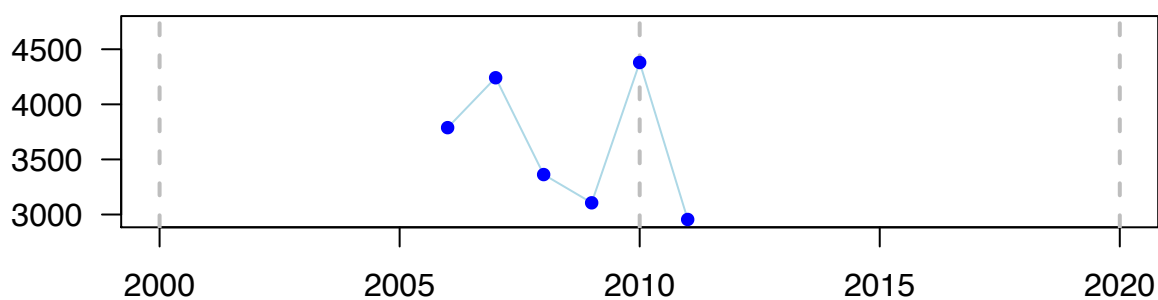

133\_cover

Romero et al. 2012

SITE: Islas Medas (station) (Spain – Mediterranean) – Po (-14 m)

OVERALL: Net = -14 %; Rate = -1.59 % yr<sup>-1</sup>; Perc Final = 64 % > decrease

DECADAL: YES (28 yr)

Cover (%)

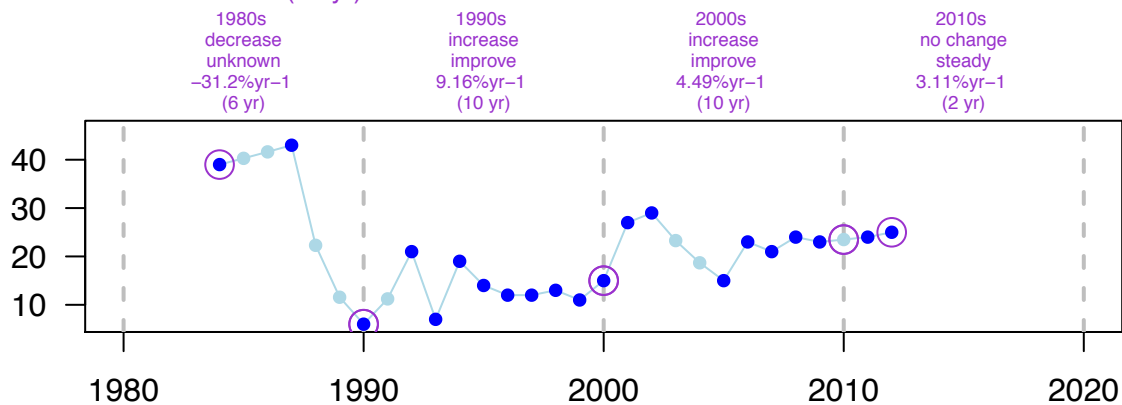



133\_density

Romero et al. 2012

SITE: Islas Medas (station) (Spain – Mediterranean) – Po (-14 m)

OVERALL: Net = -94 shoot m<sup>-2</sup>; Rate = -1.16 % yr<sup>-1</sup>; Perc Final = 72 % > decrease

DECADAL: YES (28 yr)

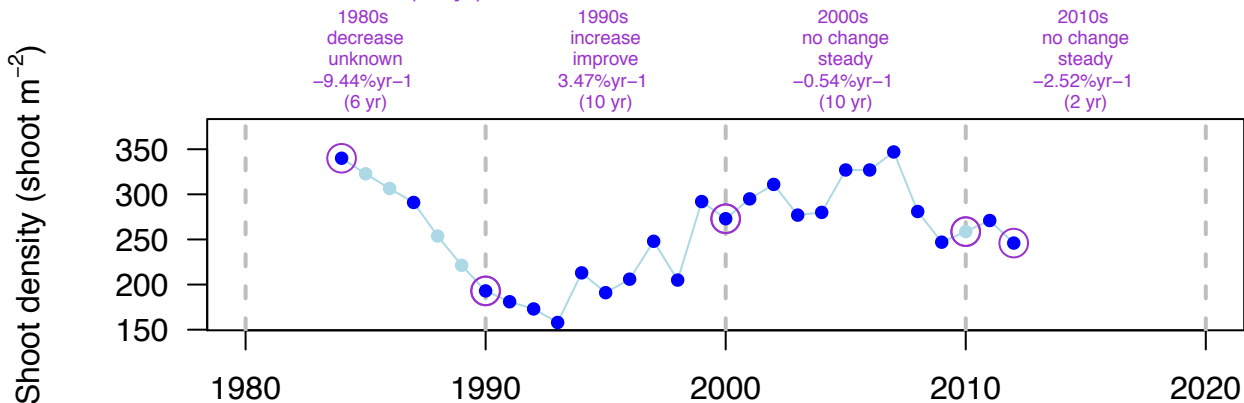

134\_cover

Romero et al. 2012

SITE: Islas Medas (station) (Spain – Mediterranean) – Po (-5 m)

OVERALL: Net = -19 %; Rate = -1.03 % yr<sup>-1</sup>; Perc Final = 75 % > decrease

DECADAL: YES (28 yr)

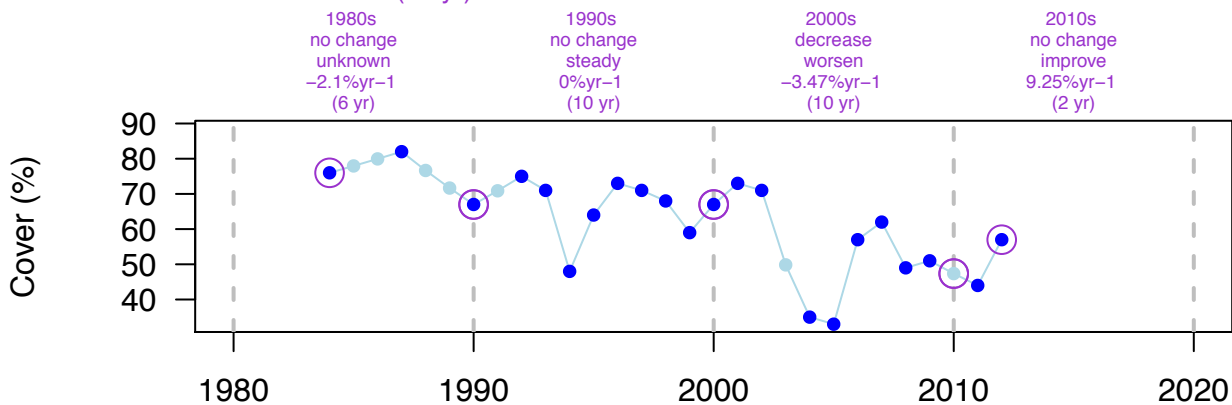

134\_density

Romero et al. 2012

SITE: Islas Medas (station) (Spain – Mediterranean) – Po (-5 m)

OVERALL: Net = -44 shoot m<sup>-2</sup>; Rate = -0.26 % yr<sup>-1</sup>; Perc Final = 93 % > no change

DECADAL: YES (28 yr)

Shoot density (shoot m<sup>-2</sup>)

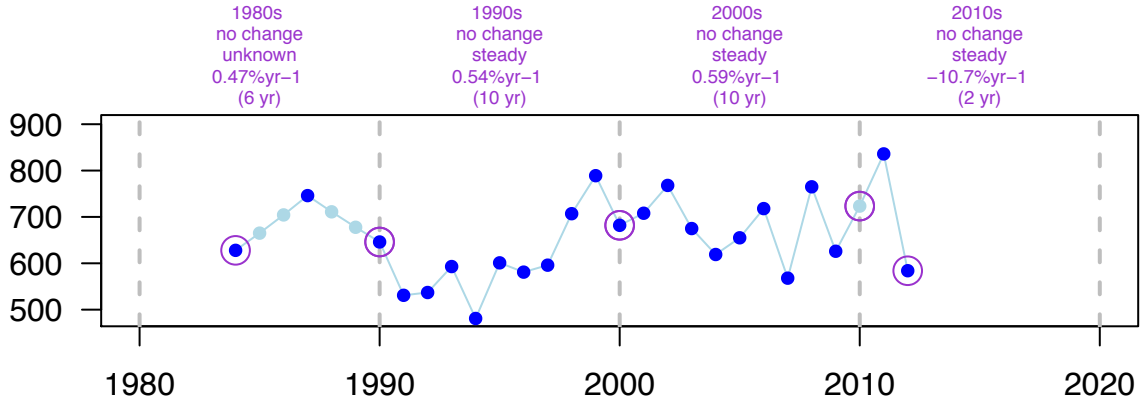

135\_cover

Romero et al. 2012

SITE: Islas Medas (station) (Spain – Mediterranean) – Po (-6.5 m)

OVERALL: Net = 13 %; Rate = 0.84 % yr<sup>-1</sup>; Perc Final = 127 % > increase

DECADAL: YES (28 yr)

Cover (%)

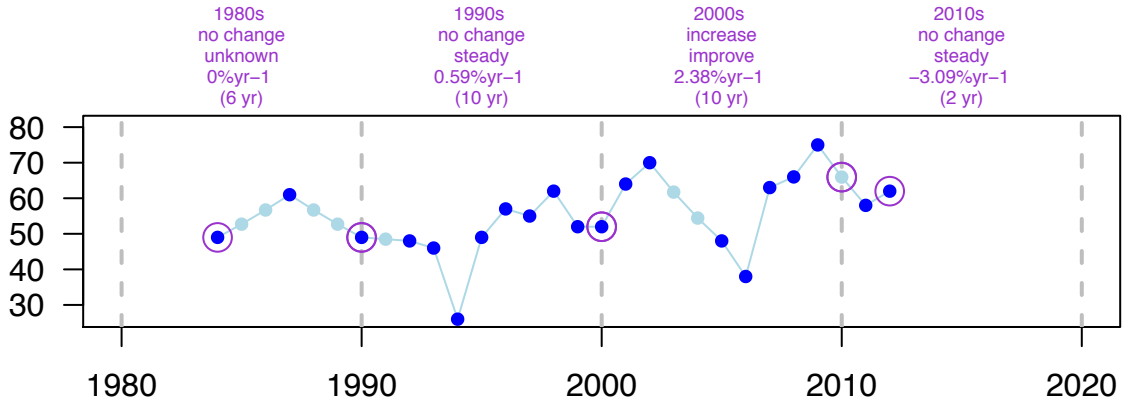

135\_density

Romero et al. 2012

SITE: Islas Medas (station) (Spain – Mediterranean) – Po (-6.5 m)

OVERALL: Net = -110 shoot m<sup>-2</sup>; Rate = -0.81 % yr<sup>-1</sup>; Perc Final = 80 % > no change

DECADAL: YES (28 yr)

Shoot density (shoot m<sup>-2</sup>)

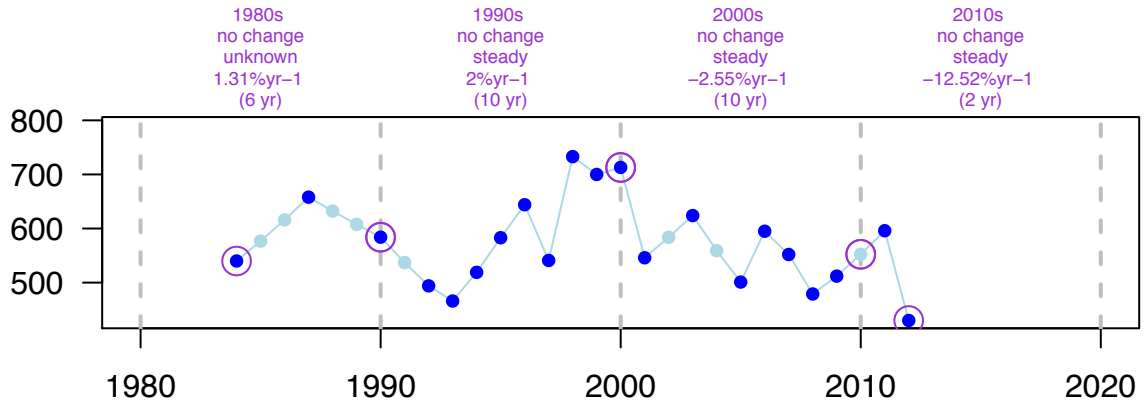

136\_cover

Romero et al. 2012

SITE: Islas Medas (station) (Spain – Mediterranean) – Po (-8.5 m)

OVERALL: Net = 6 %; Rate = 0.45 % yr<sup>-1</sup>; Perc Final = 113 % > no change

DECADAL: YES (28 yr)

Cover (%)

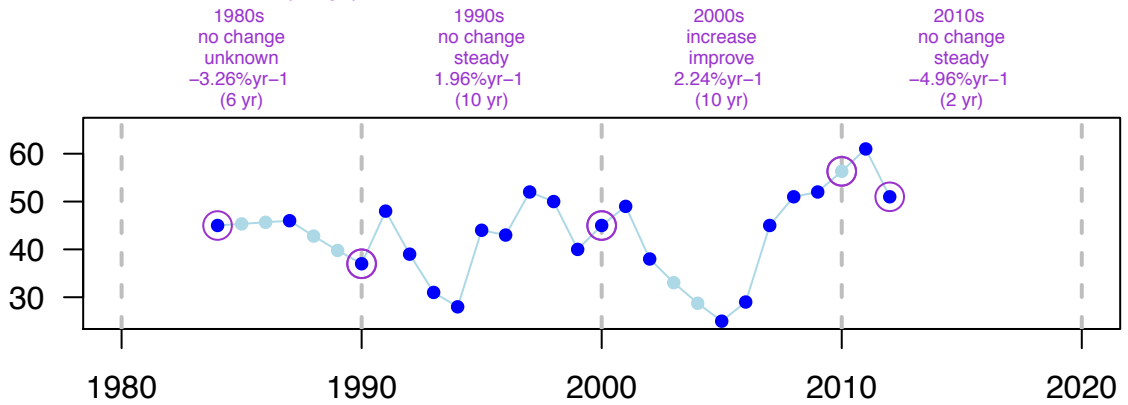

136\_density

Romero et al. 2012

SITE: Islas Medas (station) (Spain – Mediterranean) – Po (-8.5 m)

OVERALL: Net = -102 shoot m<sup>-2</sup>; Rate = -0.91 % yr<sup>-1</sup>; Perc Final = 78 % > no change

DECADAL: YES (28 yr)

Shoot density (shoot m<sup>-2</sup>)

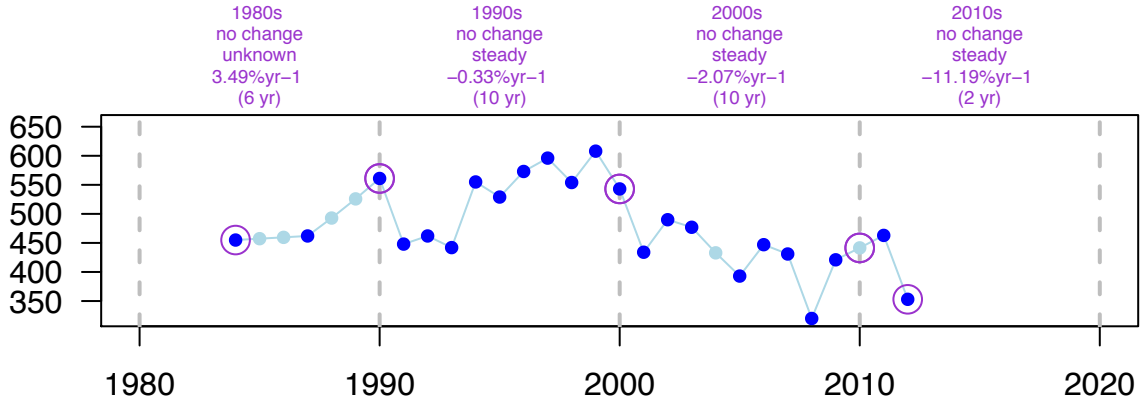

137\_cover

Romero et al. 2010 (a)

SITE: Balís (Spain – Mediterranean) – Po (-15 m)

OVERALL: Net = -7.22 %; Rate = -3.18 % yr<sup>-1</sup>; Perc Final = 80 % > no change

DECADAL: NO (7 yr)

Cover (%)

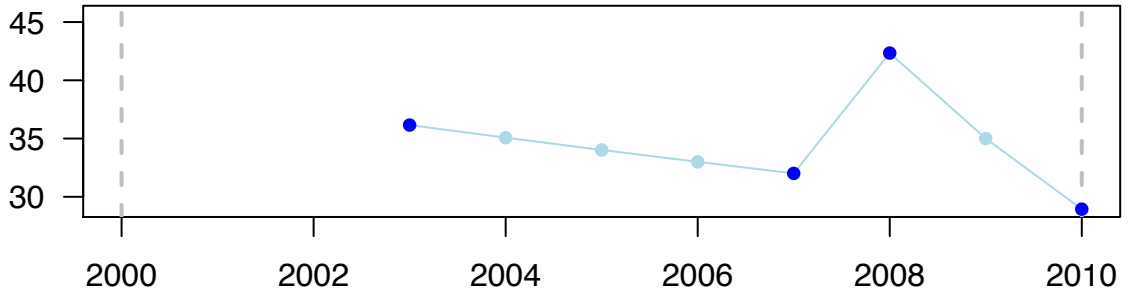

137\_density

Romero et al. 2010 (a)

SITE: Balís (Spain – Mediterranean) – Po (-15 m)

OVERALL: Net = 10.94 shoot m<sup>-2</sup>; Rate = 0.69 % yr<sup>-1</sup>; Perc Final = 105 % > no change

DECADAL: NO (7 yr)

Shoot density (shoot m<sup>-2</sup>)

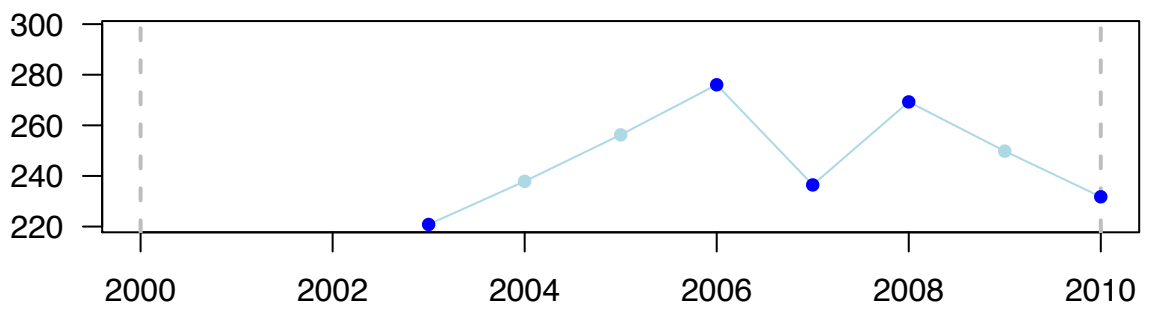

138\_cover

Romero et al. 2010 (a)

SITE: Calafat (Spain – Mediterranean) – Po (-15 m)

OVERALL: Net = -2.41 %; Rate = -1.33 % yr<sup>-1</sup>; Perc Final = 91 % > no change

DECADAL: NO (7 yr)

Cover (%)

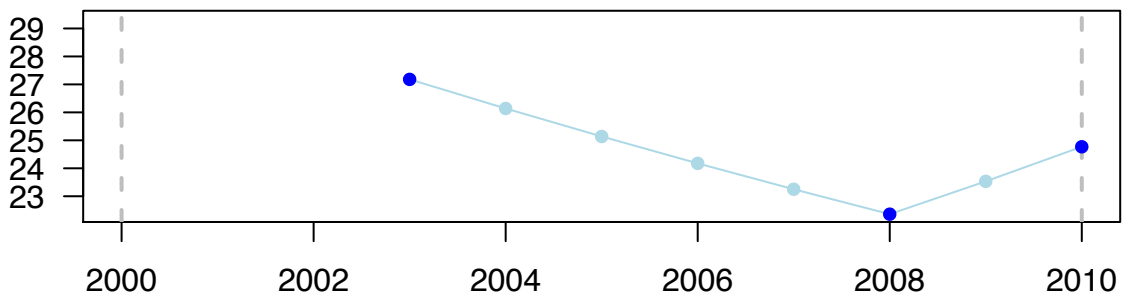

138\_density

Romero et al. 2010 (a)

SITE: Calafat (Spain – Mediterranean) – Po (-15 m)

OVERALL: Net = -144.27 shoot m<sup>-2</sup>; Rate = -9.1 % yr<sup>-1</sup>; Perc Final = 53 % > decrease

DECADAL: NO (7 yr)

Shoot density (shoot m<sup>-2</sup>)

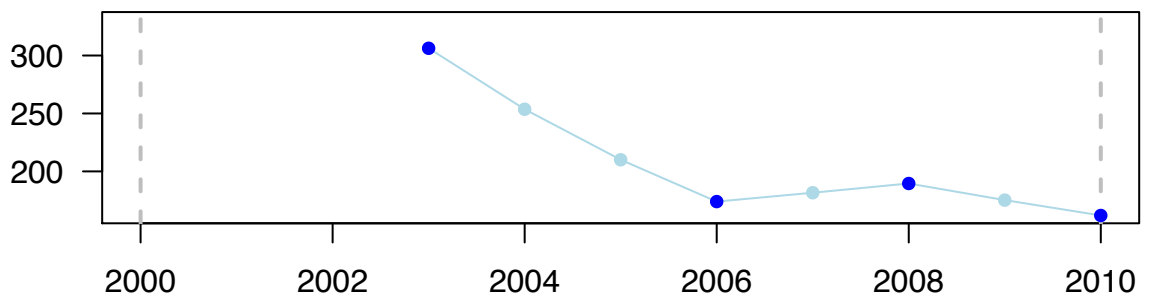

139\_cover

Romero et al. 2010 (a), Gera et al. 2014

SITE: Canyelles (Spain – Mediterranean) – Po (-15 m)

OVERALL: Net = -5.79 %; Rate = -2.46 % yr<sup>-1</sup>; Perc Final = 86 % > no change

DECADAL: NO (6 yr)

Cover (%)

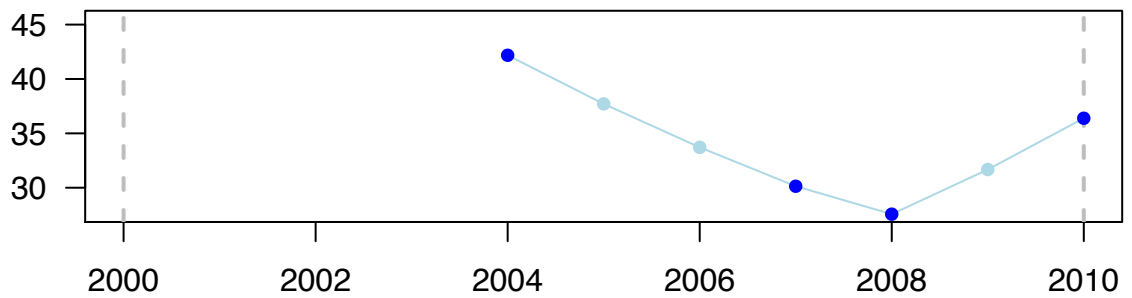

139\_density

Romero et al. 2010 (a), Gera et al. 2014

SITE: Canyelles (Spain – Mediterranean) – Po (-15 m)

OVERALL: Net = 127.6 shoot m<sup>-2</sup>; Rate = 9.95 % yr<sup>-1</sup>; Perc Final = 182 % > increase

DECADAL: NO (6 yr)

Shoot density (shoot m<sup>-2</sup>)

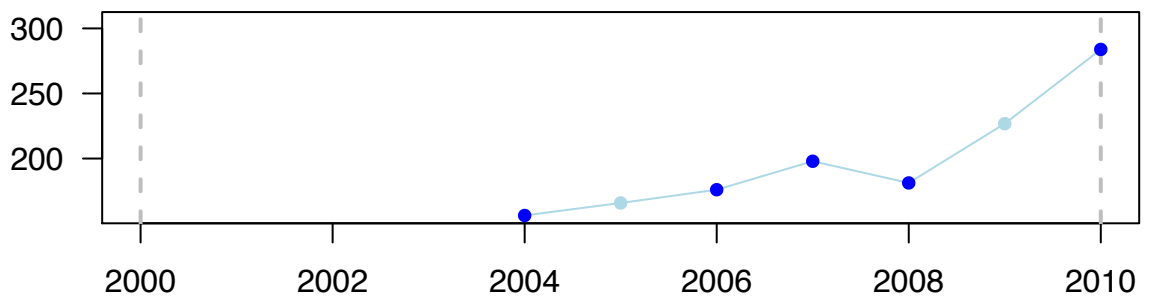

140\_cover

Romero et al. 2010 (a)

SITE: Cap Roig (Spain – Mediterranean) – Po (-9 m)

OVERALL: Net = 9.01 %; Rate = 9.62 % yr<sup>-1</sup>; Perc Final = 178 % > increase

DECADAL: NO (6 yr)

Cover (%)

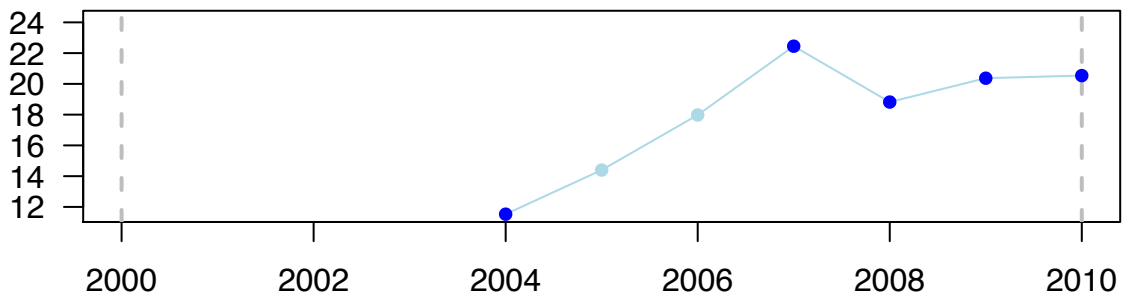

140\_density

Romero et al. 2010 (a)

SITE: Cap Roig (Spain – Mediterranean) – Po (-9 m)

OVERALL: Net = 1.57 shoot m<sup>-2</sup>; Rate = 0.11 % yr<sup>-1</sup>; Perc Final = 101 % > no change

DECADAL: NO (6 yr)

Shoot density (shoot m<sup>-2</sup>)

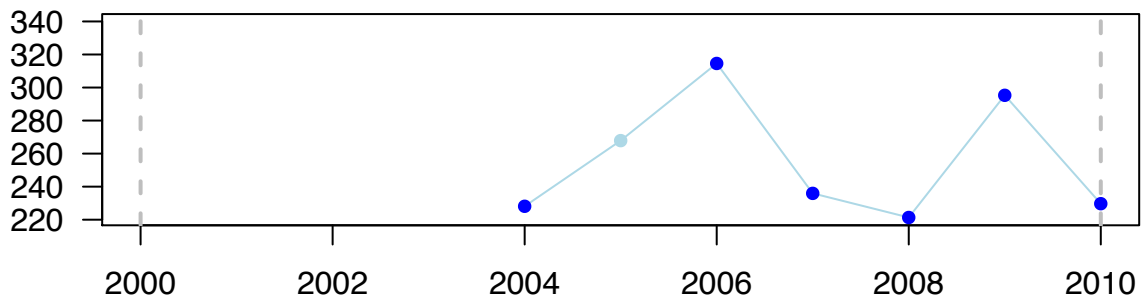

141\_cover

Romero et al. 2010 (a)

SITE: Coma-ruga (Spain – Mediterranean) – Po (-15 m)

OVERALL: Net = 10.04 %; Rate = 9.92 % yr<sup>-1</sup>; Perc Final = 221 % > increase

DECADAL: YES (8 yr)

Cover (%)

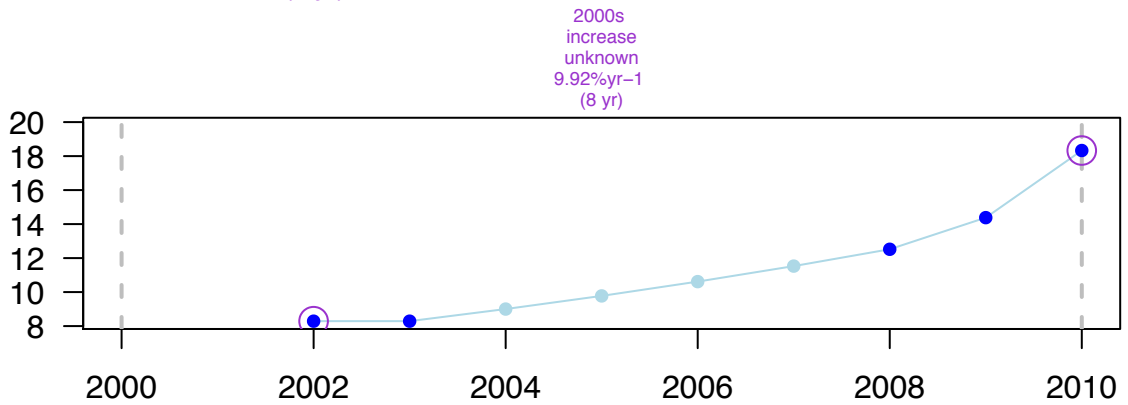



141\_density

Romero et al. 2010 (a)

SITE: Coma-ruga (Spain – Mediterranean) – Po (-15 m)

OVERALL: Net = 110.07 shoot m<sup>-2</sup>; Rate = 10.07 % yr<sup>-1</sup>; Perc Final = 224 % > increase

DECADAL: YES (8 yr)

Shoot density (shoot m<sup>-2</sup>)

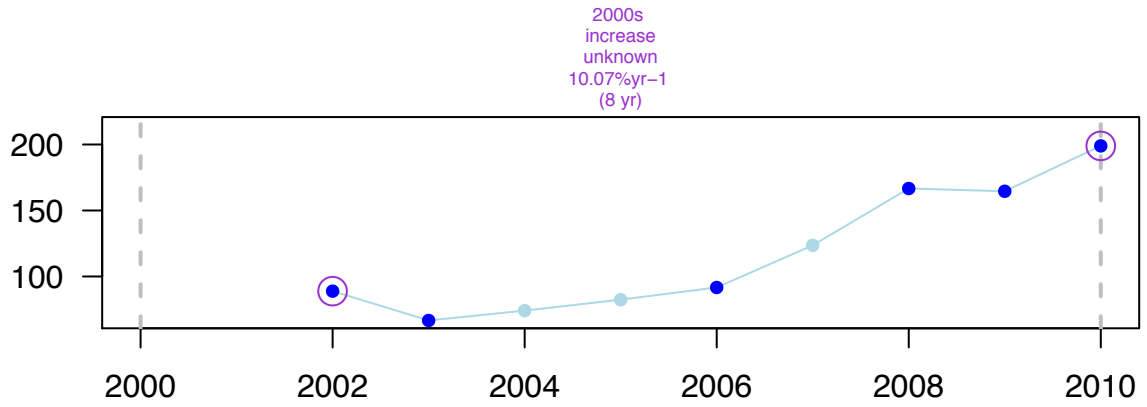

142\_cover

Romero et al. 2010 (a)

SITE: Culip (Spain – Mediterranean) – Po (-15 m)

OVERALL: Net = -0.56 %; Rate = -0.36 % yr<sup>-1</sup>; Perc Final = 98 % > no change

DECADAL: NO (7 yr)

Cover (%)

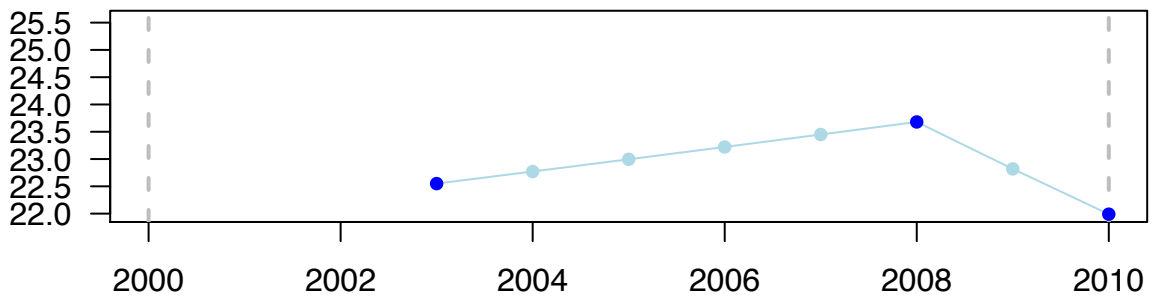

142\_density

Romero et al. 2010 (a)

SITE: Culip (Spain – Mediterranean) – Po (-15 m)

OVERALL: Net = -3.13 shoot m<sup>-2</sup>; Rate = -0.24 % yr<sup>-1</sup>; Perc Final = 98 % > no change

DECADAL: NO (7 yr)

Shoot density (shoot m<sup>-2</sup>)

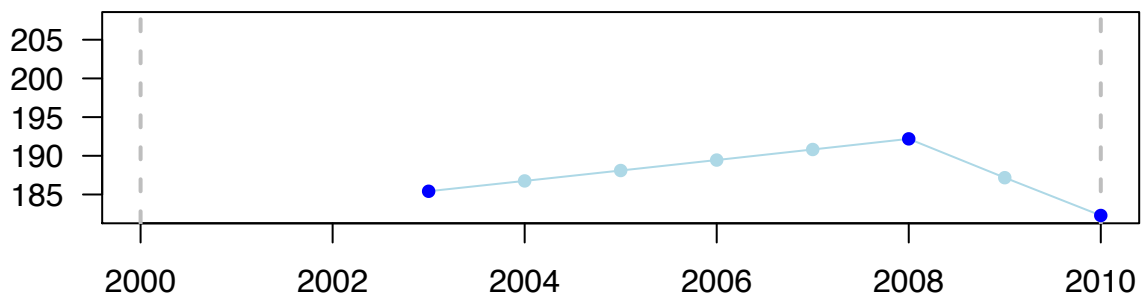

143\_cover

Romero et al. 2010 (a), Gera et al. 2014

SITE: Fenals (Spain – Mediterranean) – Po (-16.2 m)

OVERALL: Net = 4.21 %; Rate = 1.36 % yr<sup>-1</sup>; Perc Final = 112 % > no change

DECADAL: YES (8 yr)

Cover (%)

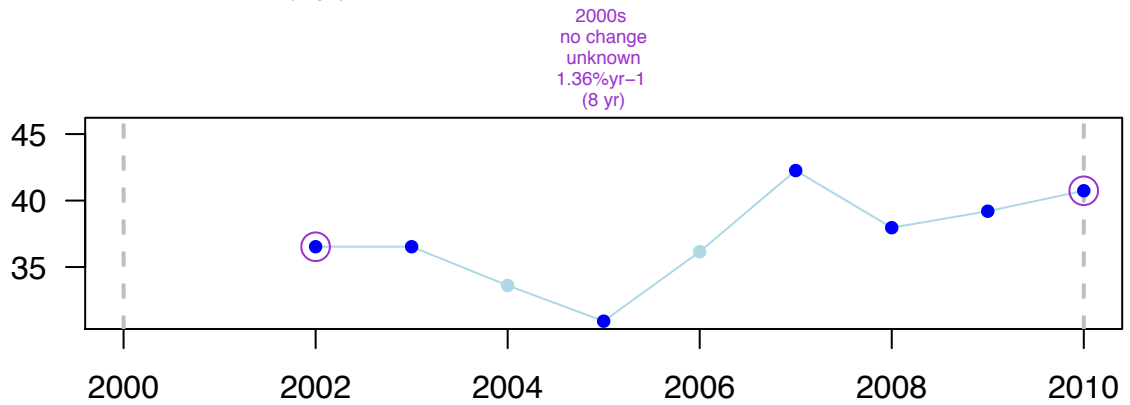

143\_density

Romero et al. 2010 (a), Gera et al. 2014

SITE: Fenals (Spain – Mediterranean) – Po (-16.2 m)

OVERALL: Net = 39.58 shoot m<sup>-2</sup>; Rate = 2.2 % yr<sup>-1</sup>; Perc Final = 119 % > no change

DECADAL: YES (8 yr)

Shoot density (shoot m<sup>-2</sup>)

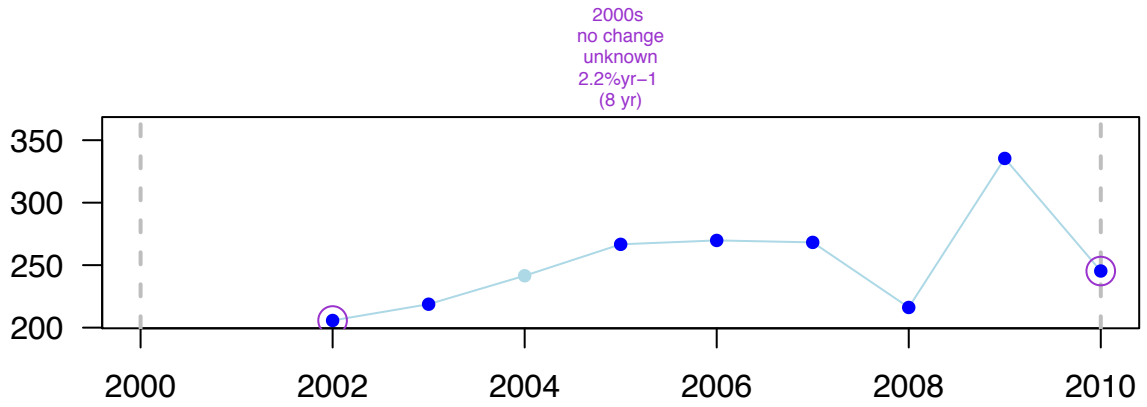

144\_cover

Romero et al. 2010 (a)

SITE: Jugadora (Spain – Mediterranean) – Po (-16 m)

OVERALL: Net = -1.52 %; Rate = -0.91 % yr<sup>-1</sup>; Perc Final = 93 % > no change

DECADAL: YES (8 yr)

Cover (%)

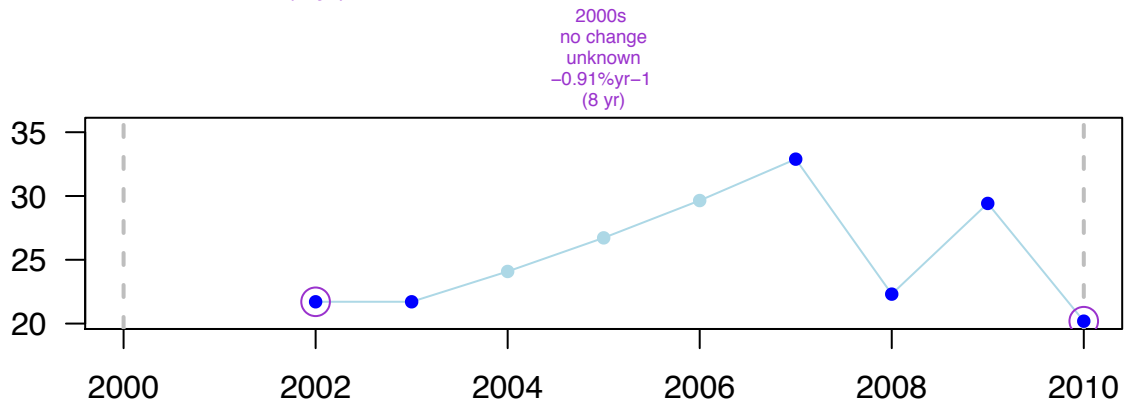

144\_density

Romero et al. 2010 (a)

SITE: Jugadora (Spain – Mediterranean) – Po (-16 m)

OVERALL: Net = 23.96 shoot m<sup>-2</sup>; Rate = 2.1 % yr<sup>-1</sup>; Perc Final = 118 % > no change

DECADAL: YES (8 yr)

Shoot density (shoot m<sup>-2</sup>)

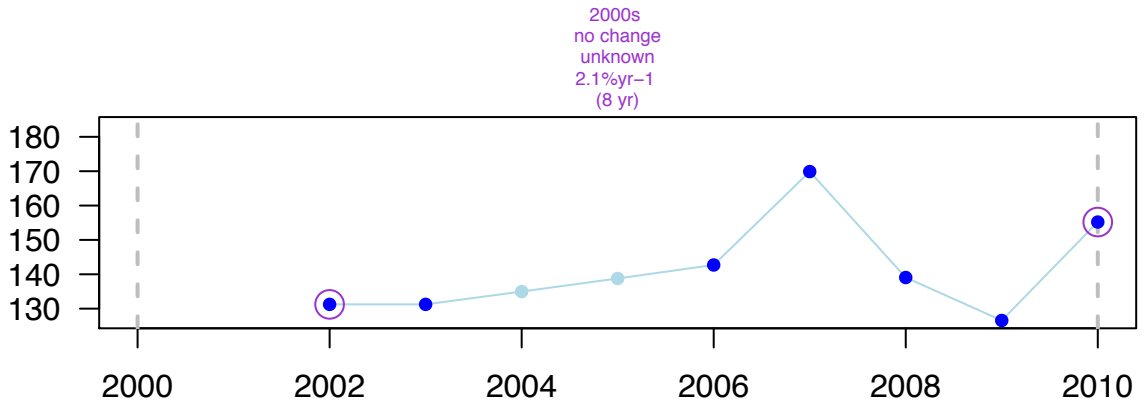

145\_cover

Romero et al. 2010 (a)

SITE: L'Ametlla de Mar (Spain – Mediterranean) – Po (-14.8 m)

OVERALL: Net = -1.25 %; Rate = -0.77 % yr<sup>-1</sup>; Perc Final = 95 % > no change

DECADAL: NO (7 yr)

Cover (%)

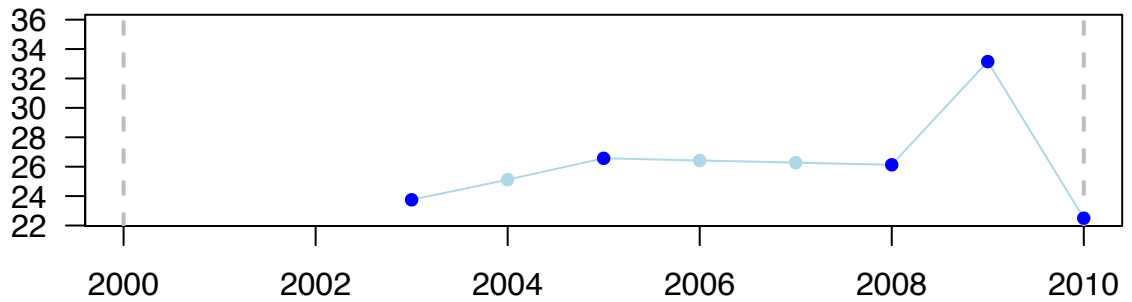

145\_density

Romero et al. 2010 (a)

SITE: L'Ametlla de Mar (Spain – Mediterranean) – Po (-14.8 m)

OVERALL: Net = -109.89 shoot m<sup>-2</sup>; Rate = -6.14 % yr<sup>-1</sup>; Perc Final = 65 % > decrease

DECADAL: NO (7 yr)

Shoot density (shoot m<sup>-2</sup>)

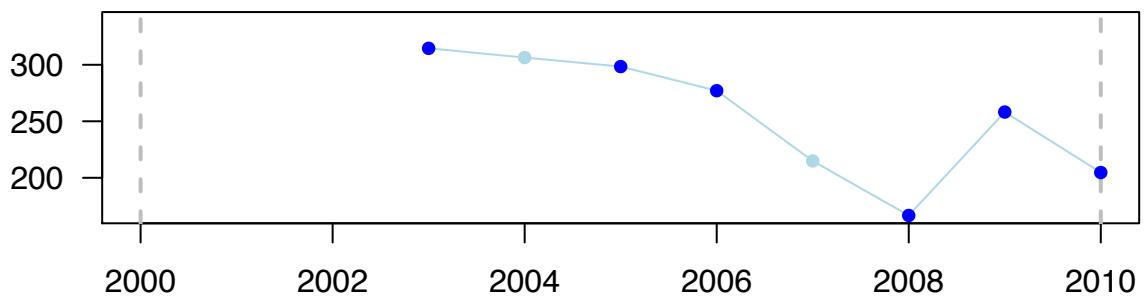

146\_cover

Romero et al. 2010 (a)

SITE: L'Hospitalet (Spain – Mediterranean) – Po (-15 m)

OVERALL: Net = 2.67 %; Rate = 2.88 % yr<sup>-1</sup>; Perc Final = 122 % > no change

DECADAL: NO (7 yr)

Cover (%)

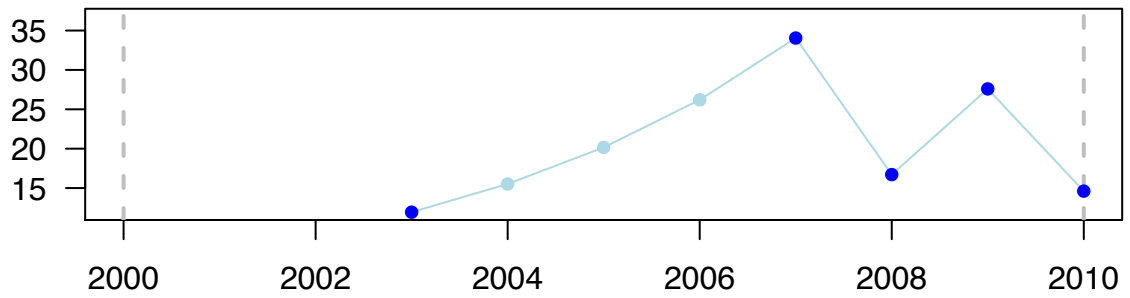

146\_density

Romero et al. 2010 (a)

SITE: L'Hospitalet (Spain – Mediterranean) – Po (-15 m)

OVERALL: Net = -61.98 shoot m<sup>-2</sup>; Rate = -4.94 % yr<sup>-1</sup>; Perc Final = 71 % > decrease

DECADAL: NO (7 yr)

Shoot density (shoot m<sup>-2</sup>)

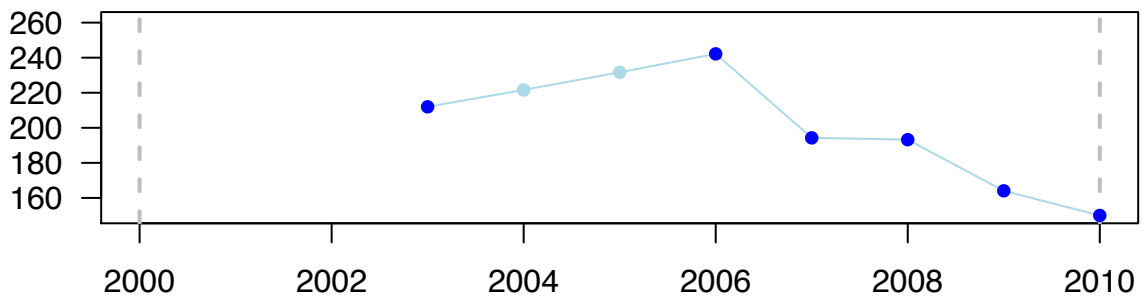

147\_cover

Romero et al. 2010 (a)

SITE: Llafranc (Spain – Mediterranean) – Po (-15.5 m)

OVERALL: Net = 6.6 %; Rate = 3.46 % yr<sup>-1</sup>; Perc Final = 127 % > increase

DECADAL: NO (7 yr)

Cover (%)

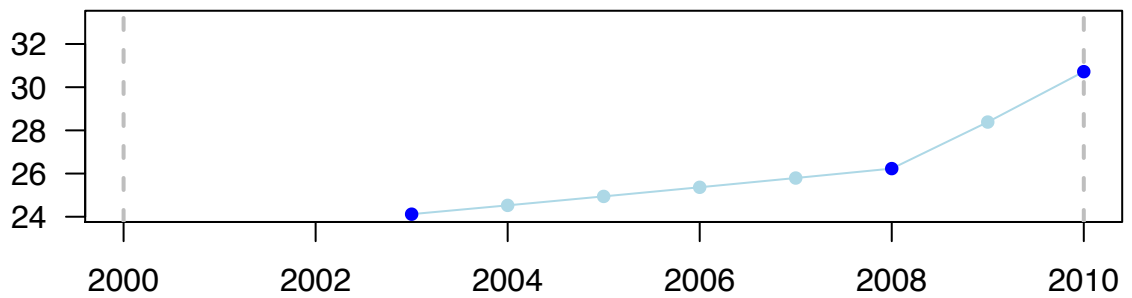

147\_density

Romero et al. 2010 (a)

SITE: Llafranc (Spain – Mediterranean) – Po (-15.5 m)

OVERALL: Net = -76.04 shoot m<sup>-2</sup>; Rate = -4.7 % yr<sup>-1</sup>; Perc Final = 72 % > decrease

DECADAL: NO (7 yr)

Shoot density (shoot m<sup>-2</sup>)

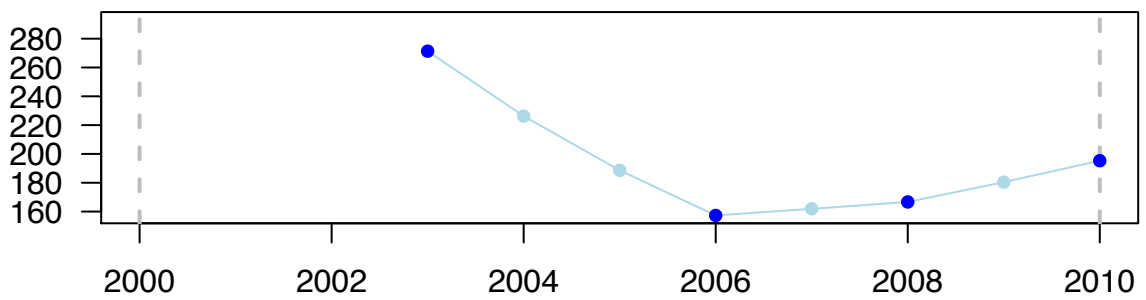

148\_abiomass

Milchakova 2003

SITE: Utiyuk Salt Lake (Ukraine – Mediterranean) – Zn (? m)

OVERALL: Net = 407 g dw m<sup>-2</sup>; Rate = 2.85 % yr<sup>-1</sup>; Perc Final = 257 % > increase

DECADAL: YES (33 yr)

AG biomass (g dw m<sup>-2</sup>)

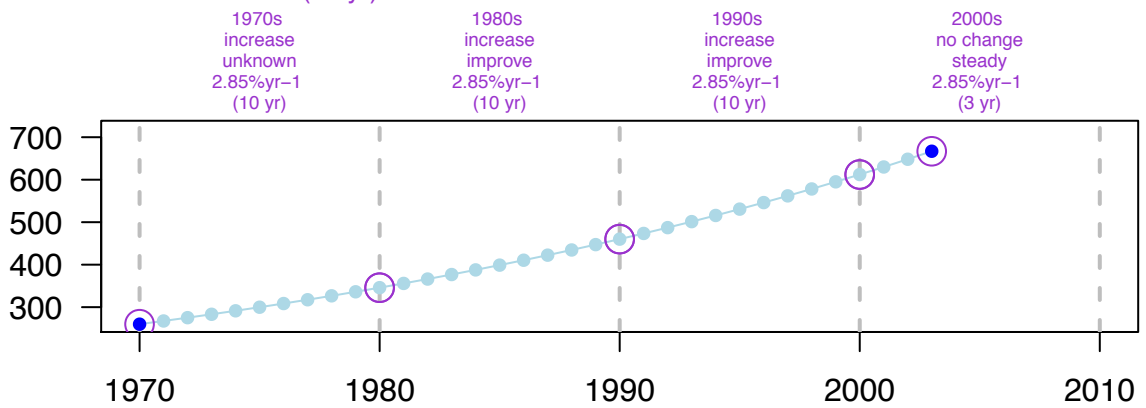

149\_cover

Romero et al. 2010 (a)

SITE: Montgó (Spain – Mediterranean) – Po (-12.5 m)

OVERALL: Net = -8.86 %; Rate = -4.49 % yr<sup>-1</sup>; Perc Final = 70 % > decrease

DECADAL: YES (8 yr)

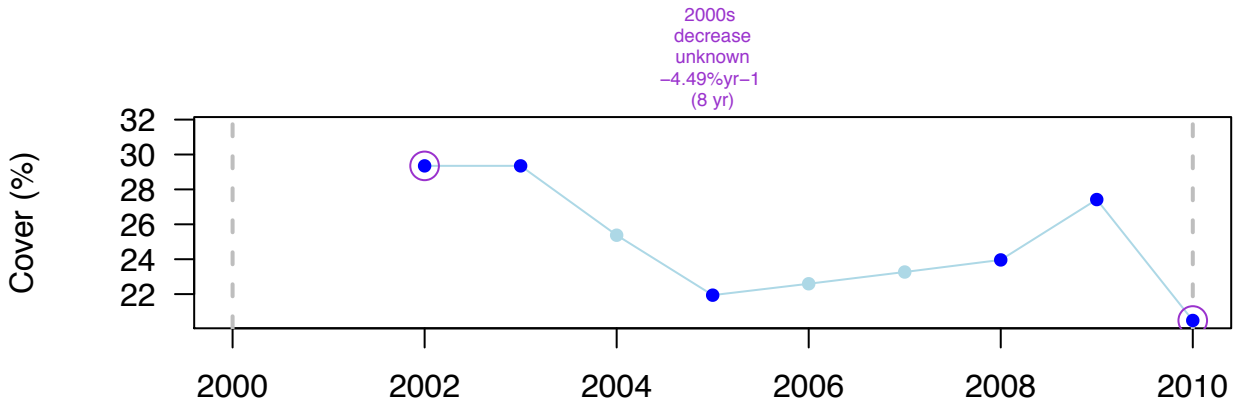

149\_density

Romero et al. 2010 (a)

SITE: Montgó (Spain – Mediterranean) – Po (-12.5 m)

OVERALL: Net = -33.78 shoot m<sup>-2</sup>; Rate = -1.7 % yr<sup>-1</sup>; Perc Final = 87 % > no change

DECADAL: YES (8 yr)

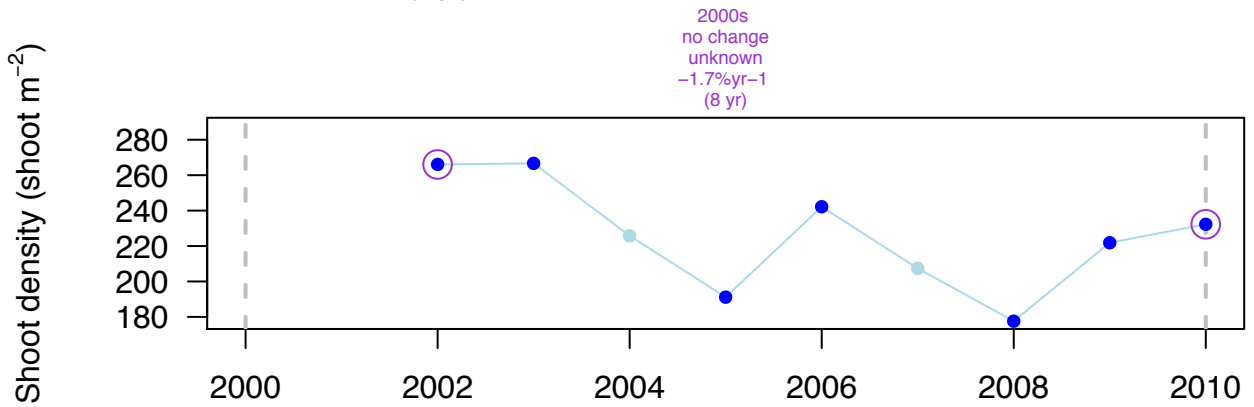



150\_cover

Romero et al. 2010 (a)

SITE: Montjoi (Spain – Mediterranean) – Po (-14 m)

OVERALL: Net = -15.52 %; Rate = -6.62 % yr<sup>-1</sup>; Perc Final = 59 % > decrease

DECADAL: YES (8 yr)

2000s  
decrease  
unknown  
-6.62%yr<sup>-1</sup>  
(8 yr)

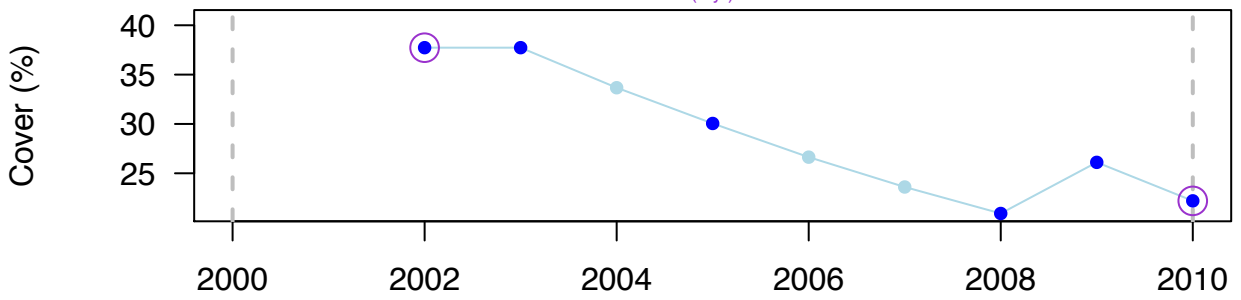

150\_density

Romero et al. 2010 (a)

SITE: Montjoi (Spain – Mediterranean) – Po (-14 m)

OVERALL: Net = -90.93 shoot m<sup>-2</sup>; Rate = -6.18 % yr<sup>-1</sup>; Perc Final = 61 % > decrease

DECADAL: YES (8 yr)

2000s  
decrease  
unknown  
-6.18%yr<sup>-1</sup>  
(8 yr)

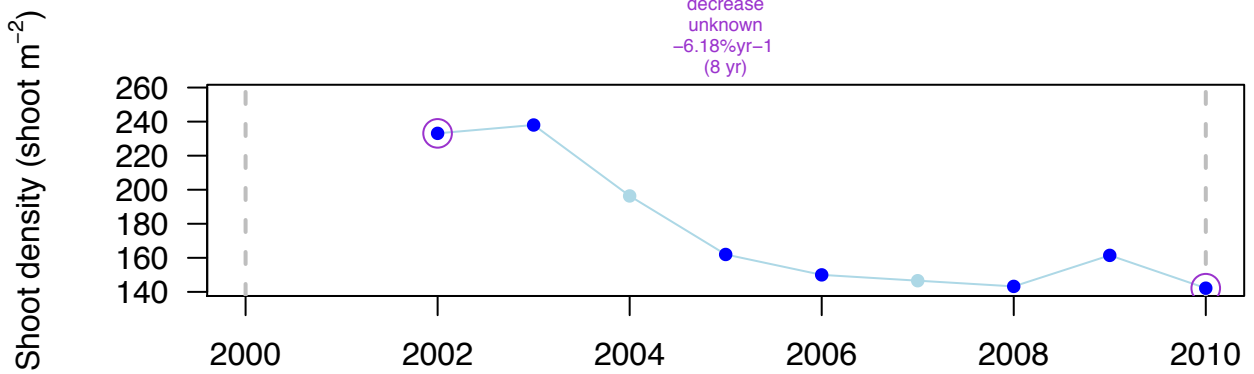

151\_cover

Romero et al. 2010 (a)

SITE: Montroig del Camp (Spain – Mediterranean) – Po (-15 m)

OVERALL: Net = -0.51 %; Rate = -0.32 % yr<sup>-1</sup>; Perc Final = 97 % > no change

DECADAL: YES (8 yr)

2000s  
no change  
unknown  
-0.32%yr<sup>-1</sup>  
(8 yr)

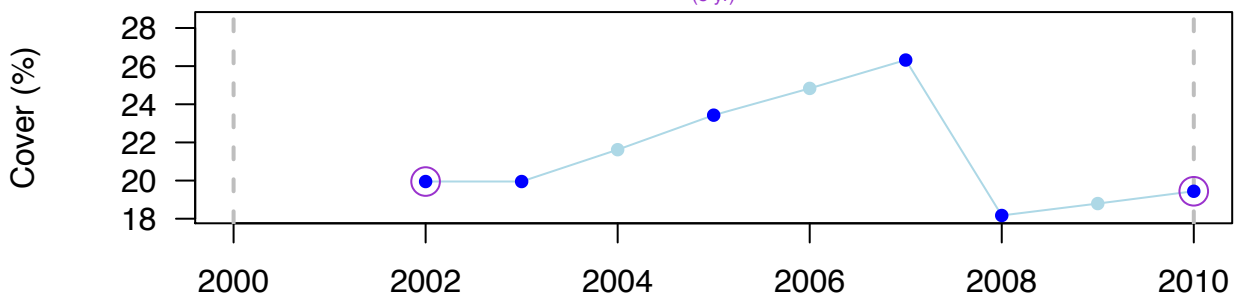

151\_density

Romero et al. 2010 (a)

SITE: Montroig del Camp (Spain – Mediterranean) – Po (-15 m)

OVERALL: Net = -15.62 shoot m<sup>-2</sup>; Rate = -1.2 % yr<sup>-1</sup>; Perc Final = 91 % > no change

DECADAL: YES (8 yr)

2000s  
no change  
unknown  
-1.2%yr<sup>-1</sup>  
(8 yr)

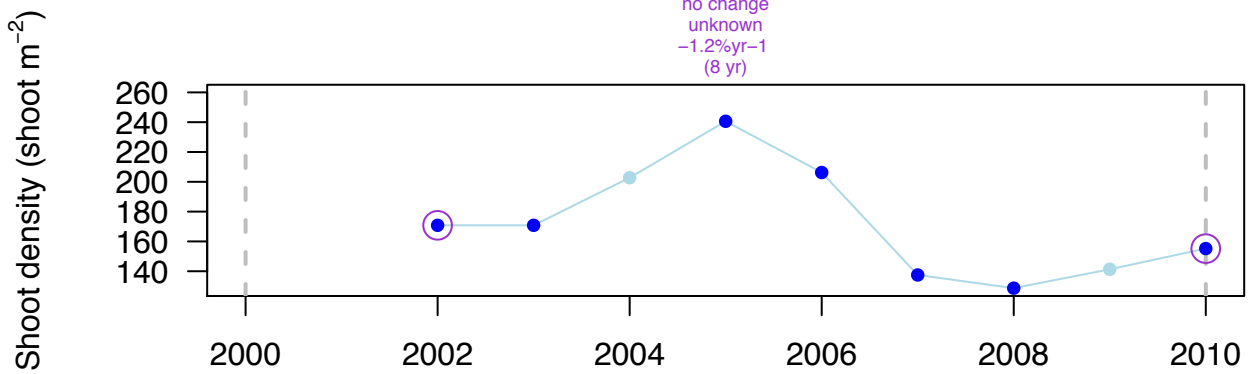

152\_cover

Romero et al. 2010 (a), Gera et al. 2014

SITE: Palamós (Spain – Mediterranean) – Po (-14.2 m)

OVERALL: Net = -10.14 %; Rate = -5.49 % yr<sup>-1</sup>; Perc Final = 68 % > decrease

DECADAL: NO (7 yr)

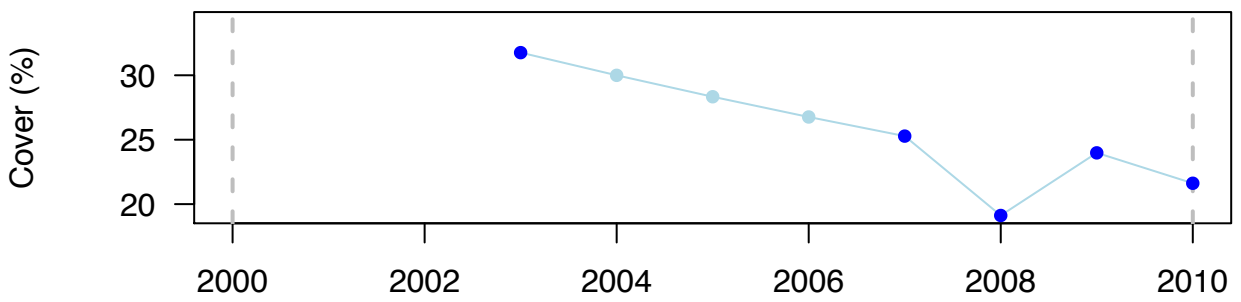

152\_density

Romero et al. 2010 (a), Gera et al. 2014

SITE: Palamós (Spain – Mediterranean) – Po (-14.2 m)

OVERALL: Net = -45.83 shoot m<sup>-2</sup>; Rate = -3.81 % yr<sup>-1</sup>; Perc Final = 77 % > no change

DECADAL: NO (7 yr)

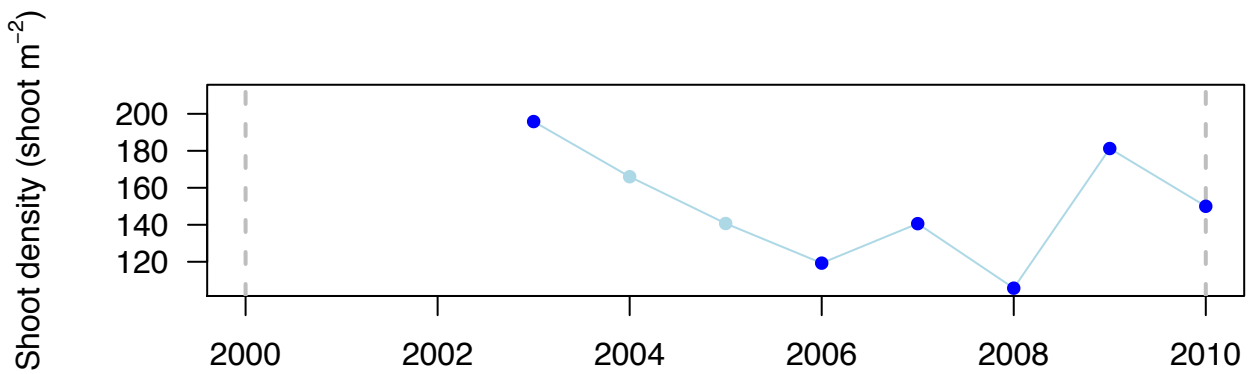

153\_cover

Romero et al. 2010 (a)

SITE: Port de la Selva (Spain – Mediterranean) – Po (-14 m)

OVERALL: Net = -16.62 %; Rate = -15.61 % yr<sup>-1</sup>; Perc Final = 63 % > decrease

DECADAL: NO (3 yr)

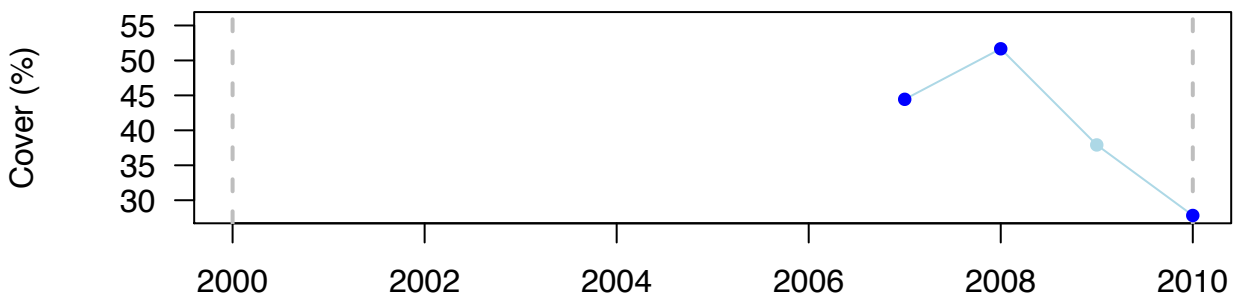

153\_density

Romero et al. 2010 (a)

SITE: Port de la Selva (Spain – Mediterranean) – Po (-14 m)

OVERALL: Net = 16.67 shoot m<sup>-2</sup>; Rate = 1.73 % yr<sup>-1</sup>; Perc Final = 107 % > no change

DECADAL: NO (4 yr)

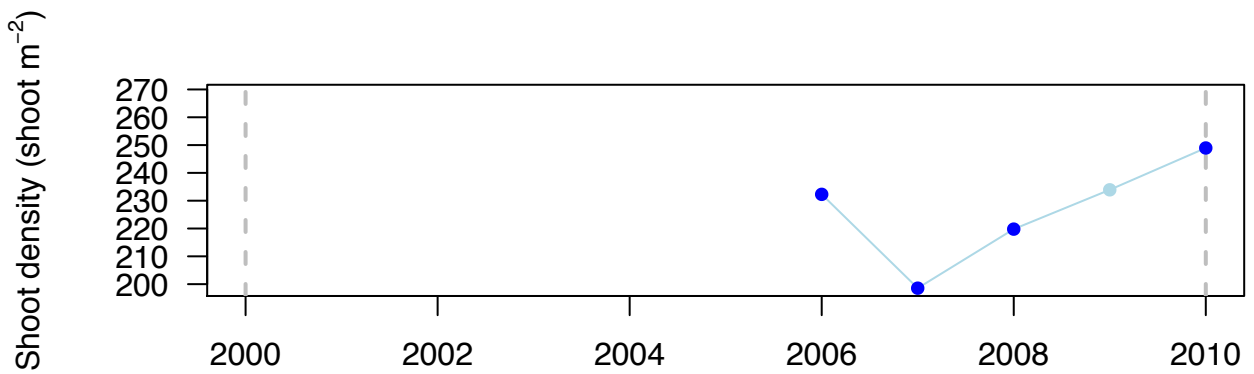

154\_cover

Romero et al. 2010 (a)

SITE: Roses (near port) (Spain – Mediterranean) – Po (-13 m)

OVERALL: Net = 10.72 %; Rate = 11.55 % yr<sup>-1</sup>; Perc Final = 225 % > increase

DECADAL: NO (7 yr)

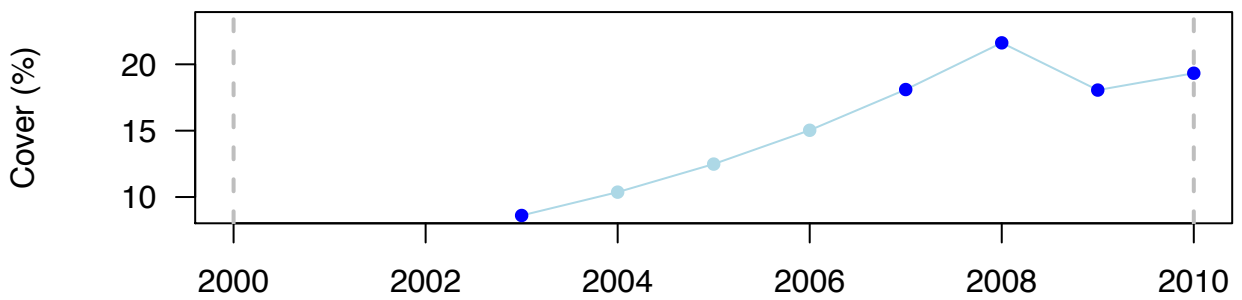

154\_density

Romero et al. 2010 (a)

SITE: Roses (near port) (Spain – Mediterranean) – Po (-13 m)

OVERALL: Net = -3.65 shoot m<sup>-2</sup>; Rate = -0.37 % yr<sup>-1</sup>; Perc Final = 97 % > no change

DECADAL: NO (7 yr)

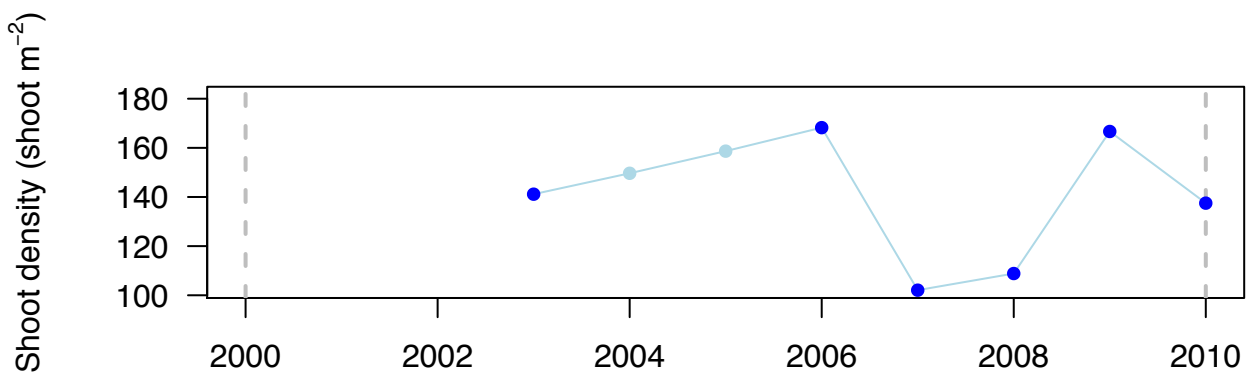

155\_cover

Romero et al. 2010 (a)

SITE: Roses (Playa Almadraba) (Spain – Mediterranean) – Po (-13 m)

OVERALL: Net = -12.8 %; Rate = -13.69 % yr<sup>-1</sup>; Perc Final = 66 % > decrease

DECADAL: NO (3 yr)

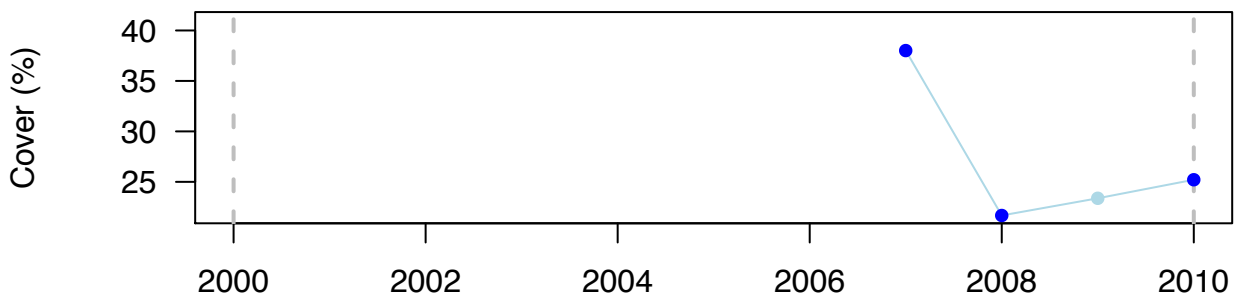

155\_density

Romero et al. 2010 (a)

SITE: Roses (Playa Almadraba) (Spain – Mediterranean) – Po (-13 m)

OVERALL: Net = 9.38 shoot m<sup>-2</sup>; Rate = 1.79 % yr<sup>-1</sup>; Perc Final = 106 % > no change

DECADAL: NO (3 yr)

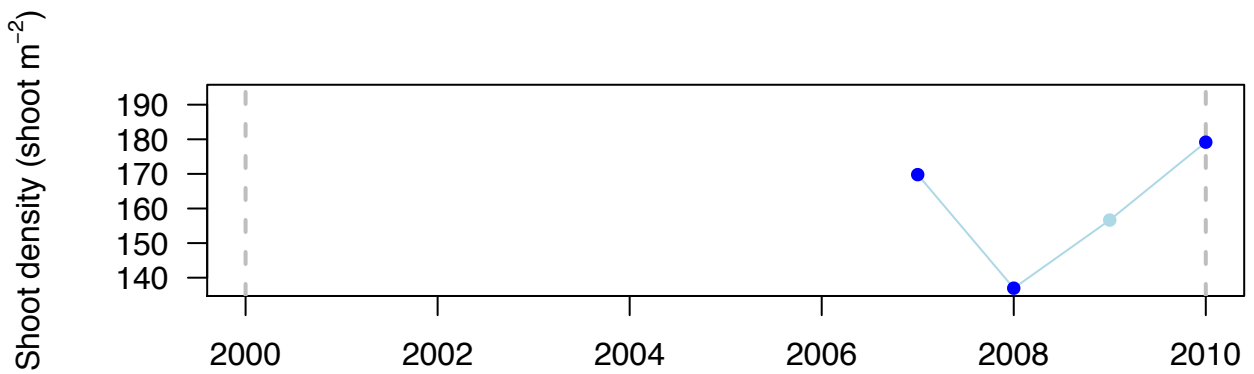

156\_cover

Romero et al. 2010 (a)

SITE: Rovellada (Spain – Mediterranean) – Po (-14 m)

OVERALL: Net = -21.39 %; Rate = -10.61 % yr<sup>-1</sup>; Perc Final = 53 % > decrease

DECADAL: NO (6 yr)

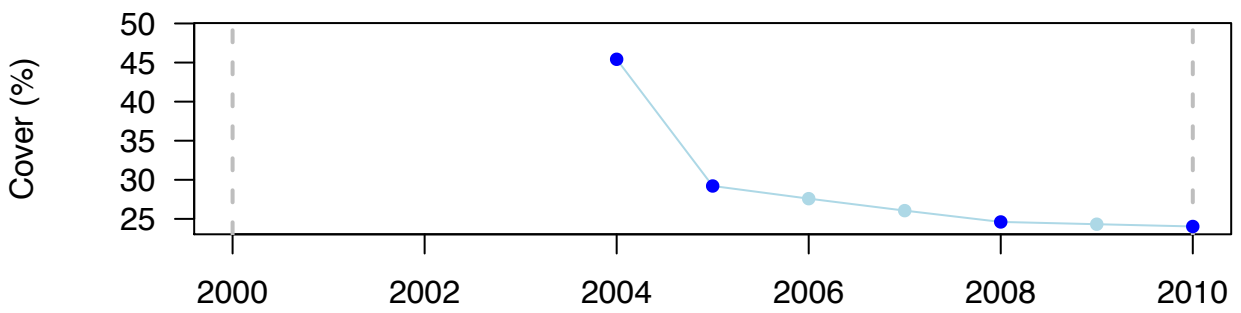

156\_density

Romero et al. 2010 (a)

SITE: Rovellada (Spain – Mediterranean) – Po (-14 m)

OVERALL: Net = 32.3 shoot m<sup>-2</sup>; Rate = 2.33 % yr<sup>-1</sup>; Perc Final = 115 % > no change

DECADAL: NO (6 yr)

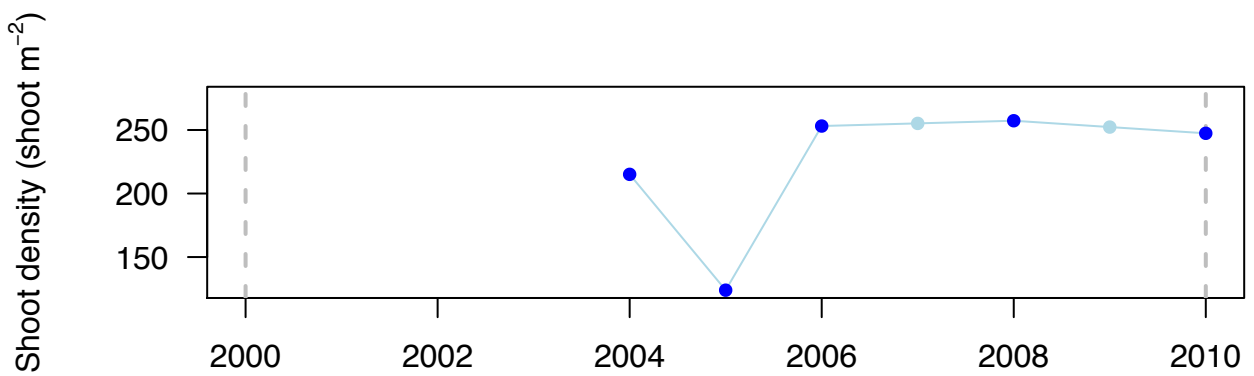

157\_cover

Romero et al. 2010 (a)

SITE: Sa Tuna (Spain – Mediterranean) – Po (-14 m)

OVERALL: Net = 22.66 %; Rate = 13.56 % yr<sup>-1</sup>; Perc Final = 258 % > increase

DECADAL: NO (7 yr)

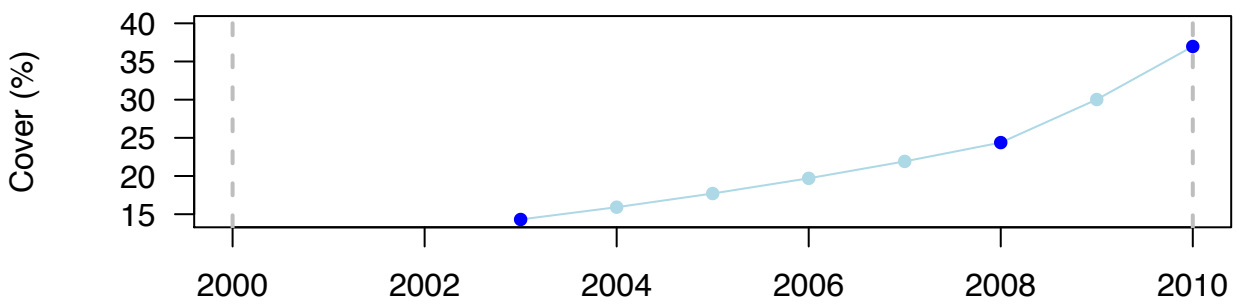

157\_density

Romero et al. 2010 (a)

SITE: Sa Tuna (Spain – Mediterranean) – Po (-14 m)

OVERALL: Net = 15.1 shoot m<sup>-2</sup>; Rate = 0.76 % yr<sup>-1</sup>; Perc Final = 105 % > no change

DECADAL: NO (7 yr)

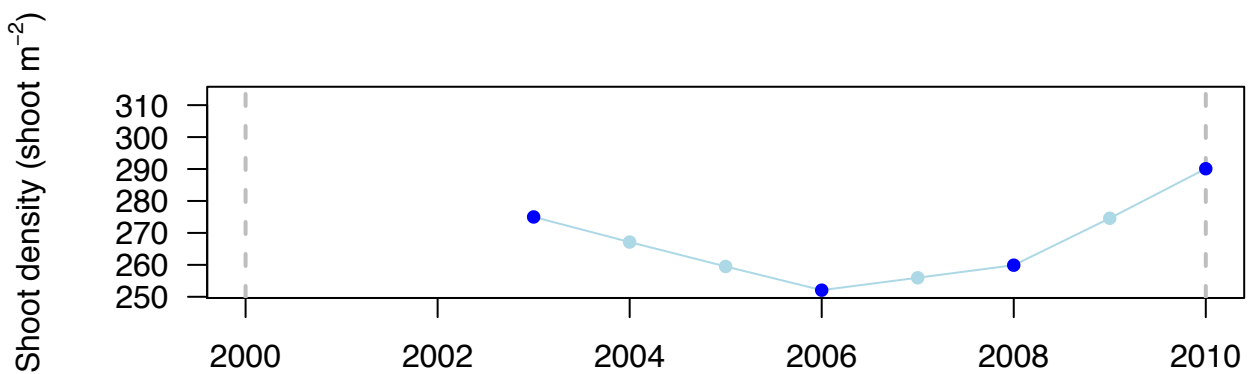



158\_cover

Romero et al. 2010 (a)

SITE: Salou (Spain – Mediterranean) – Po (-14.5 m)

OVERALL: Net = 3.22 %; Rate = 6.85 % yr<sup>-1</sup>; Perc Final = 162 % > increase

DECADAL: NO (7 yr)

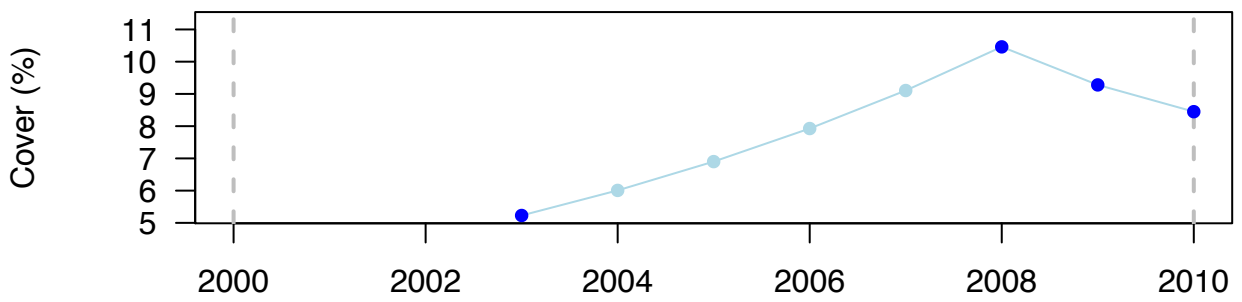

158\_density

Romero et al. 2010 (a)

SITE: Salou (Spain – Mediterranean) – Po (-14.5 m)

OVERALL: Net = -76.04 shoot m<sup>-2</sup>; Rate = -10.64 % yr<sup>-1</sup>; Perc Final = 47 % > decrease

DECADAL: NO (7 yr)

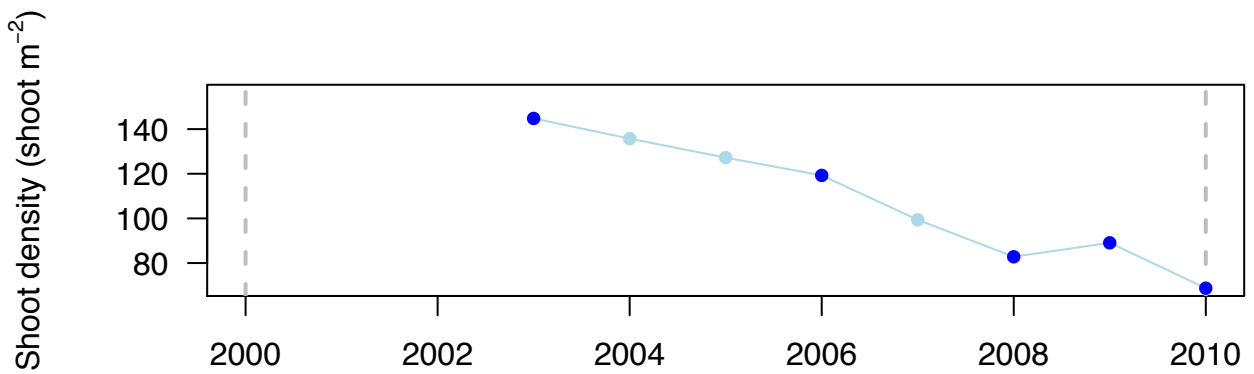

159\_cover

Romero et al. 2010 (a)

SITE: Sant Feliu (Spain – Mediterranean) – Po (-14.5 m)

OVERALL: Net = 1.14 %; Rate = 0.44 % yr<sup>-1</sup>; Perc Final = 103 % > no change

DECADAL: NO (7 yr)

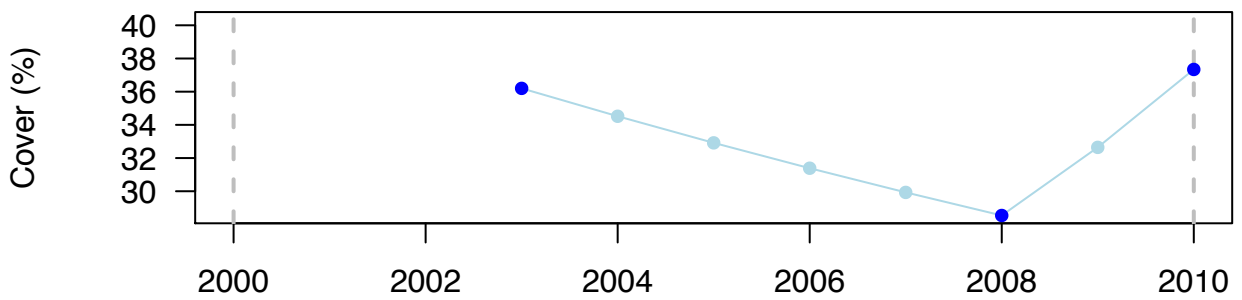

159\_density

Romero et al. 2010 (a)

SITE: Sant Feliu (Spain – Mediterranean) – Po (-14.5 m)

OVERALL: Net = -28.65 shoot m<sup>-2</sup>; Rate = -1.54 % yr<sup>-1</sup>; Perc Final = 90 % > no change

DECADAL: NO (7 yr)

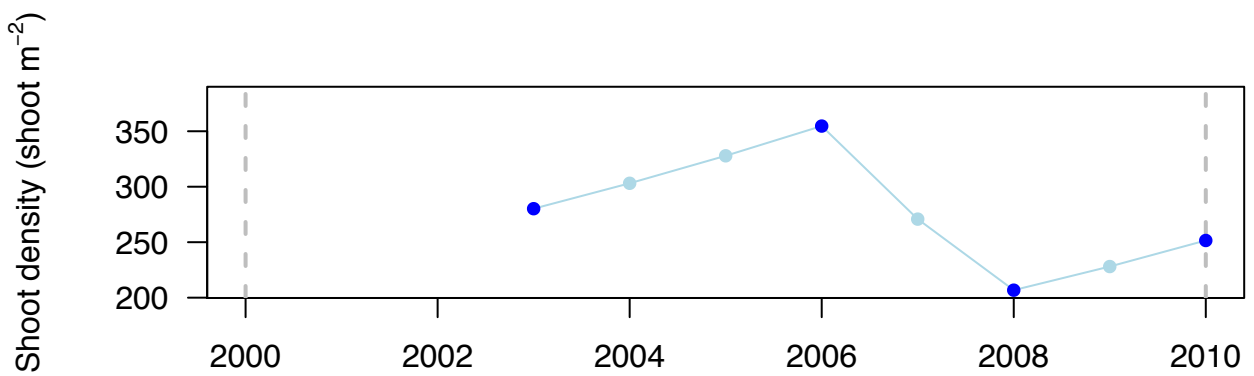

160\_cover

Romero et al. 2010 (a)

SITE: Sitges (Spain – Mediterranean) – Po (-16.5 m)

OVERALL: Net = 12.52 %; Rate = 32.79 % yr<sup>-1</sup>; Perc Final = 1378 % > increase

DECADAL: YES (8 yr)

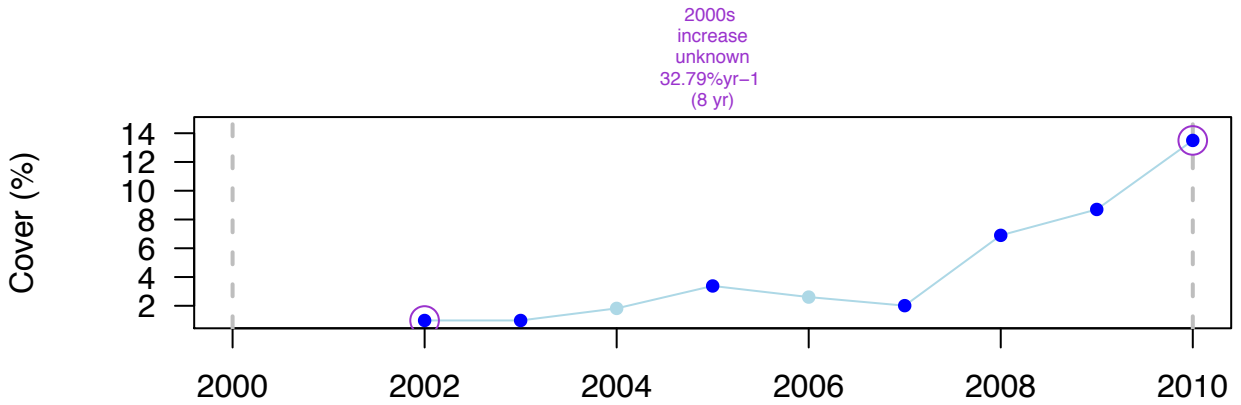

160\_density

Romero et al. 2010 (a)

SITE: Sitges (Spain – Mediterranean) – Po (-16.5 m)

OVERALL: Net = 139.07 shoot m<sup>-2</sup>; Rate = 15.24 % yr<sup>-1</sup>; Perc Final = 338 % > increase

DECADAL: YES (8 yr)

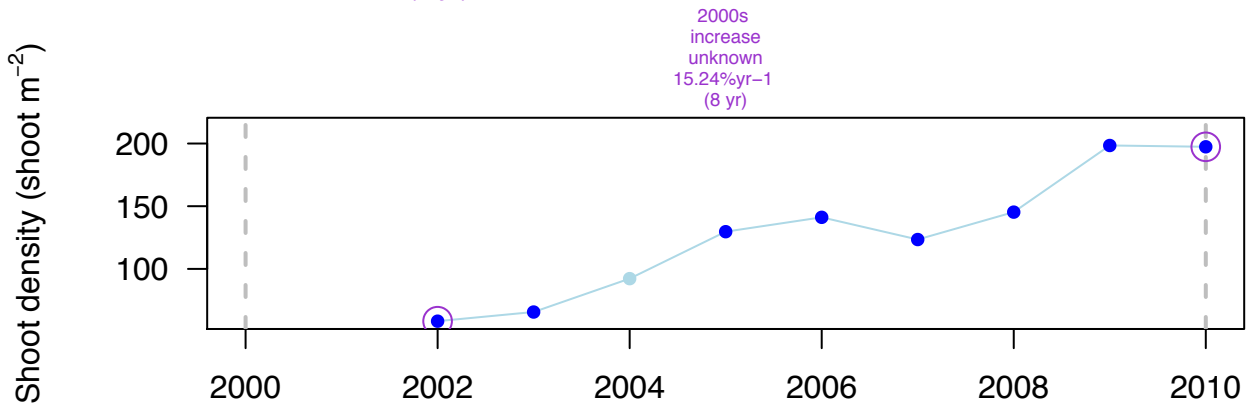

161\_cover

Romero et al. 2010 (a)

SITE: Tamariua (Spain – Mediterranean) – Po (-15 m)

OVERALL: Net = 0.55 %; Rate = 0.27 % yr<sup>-1</sup>; Perc Final = 102 % > no change

DECADAL: NO (6 yr)

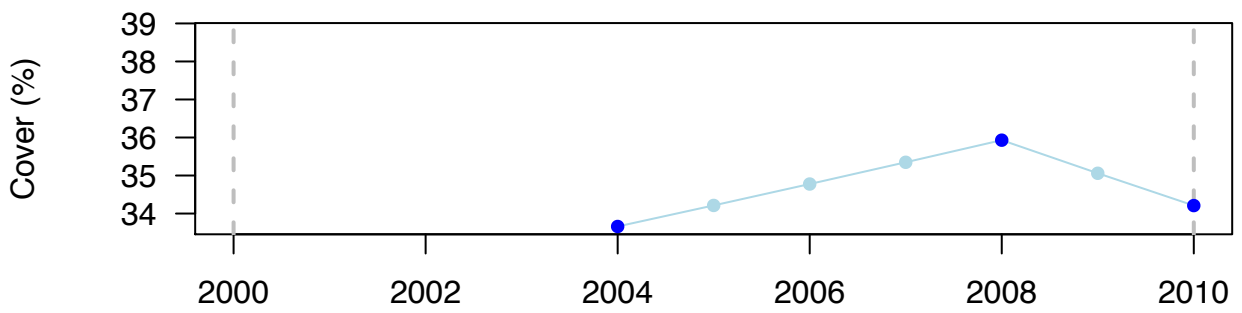

161\_density

Romero et al. 2010 (a)

SITE: Tamariua (Spain – Mediterranean) – Po (-15 m)

OVERALL: Net = -37.5 shoot m<sup>-2</sup>; Rate = -2.65 % yr<sup>-1</sup>; Perc Final = 85 % > no change

DECADAL: NO (6 yr)

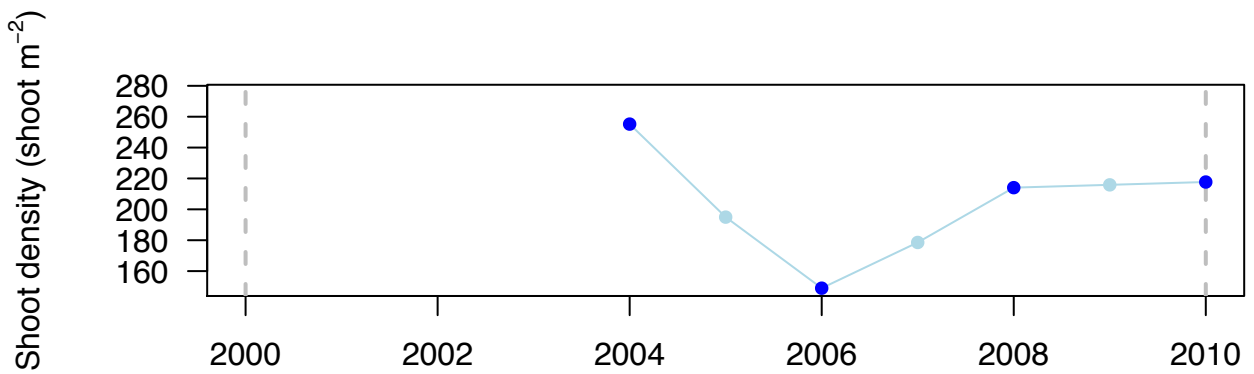

162\_cover

Romero et al. 2010 (a)

SITE: Torredembarra (Spain – Mediterranean) – Po (-15 m)

OVERALL: Net = 19.63 %; Rate = 20.71 % yr<sup>-1</sup>; Perc Final = 426 % > increase

DECADAL: NO (7 yr)

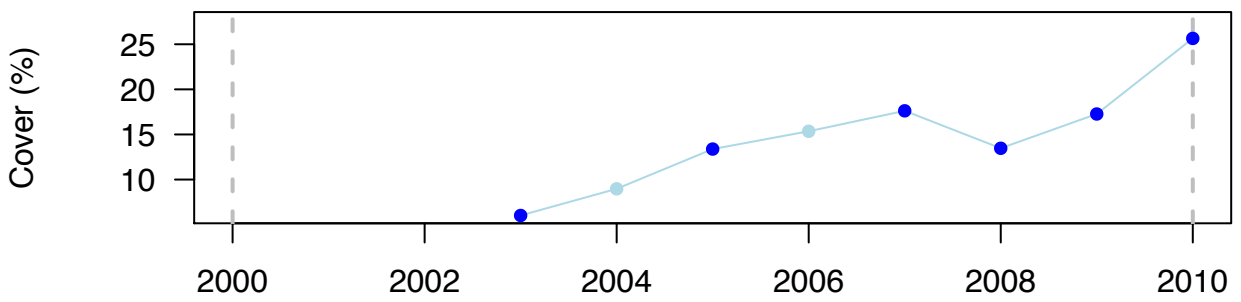

162\_density

Romero et al. 2010 (a)

SITE: Torredembarra (Spain – Mediterranean) – Po (-15 m)

OVERALL: Net = 7.81 shoot m<sup>-2</sup>; Rate = 0.69 % yr<sup>-1</sup>; Perc Final = 105 % > no change

DECADAL: NO (7 yr)

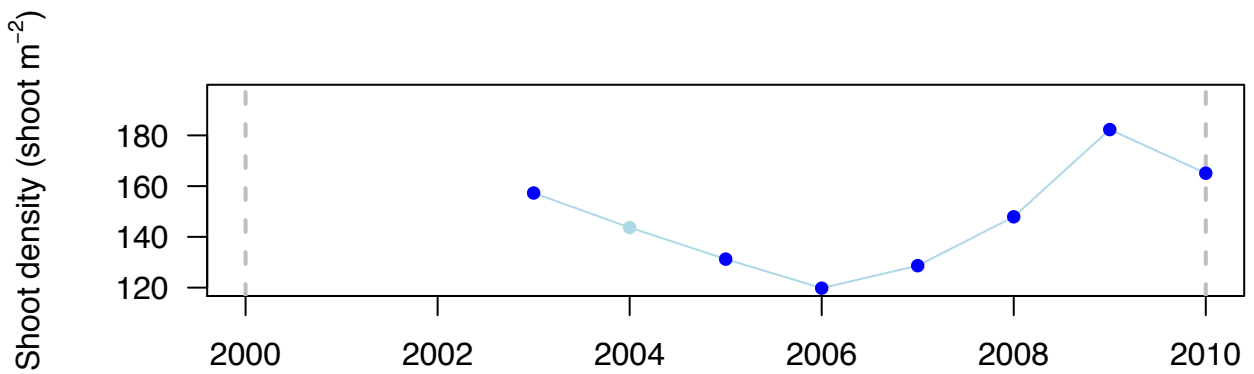

163\_cover

Romero et al. 2010 (a)

SITE: Tossa de Mar (Spain – Mediterranean) – Po (-14 m)

OVERALL: Net = 19.65 %; Rate = 9.71 % yr<sup>-1</sup>; Perc Final = 197 % > increase

DECADAL: NO (7 yr)

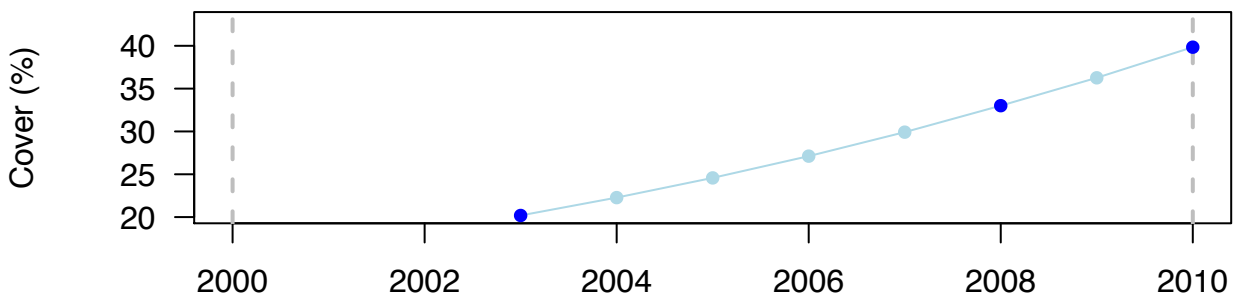

163\_density

Romero et al. 2010 (a)

SITE: Tossa de Mar (Spain – Mediterranean) – Po (-14 m)

OVERALL: Net = -94.79 shoot m<sup>-2</sup>; Rate = -5.45 % yr<sup>-1</sup>; Perc Final = 68 % > decrease

DECADAL: NO (7 yr)

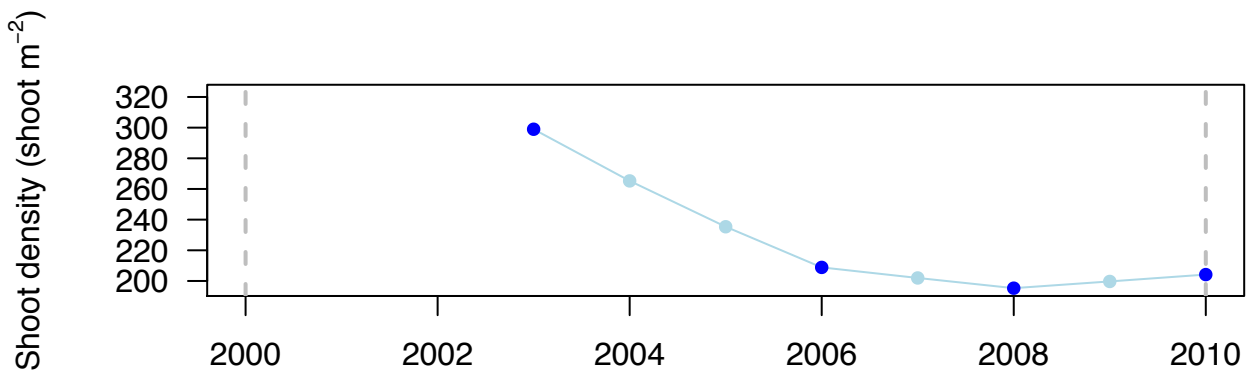

164\_cover

Romero et al. 2010 (a)

SITE: Vilanova (Spain – Mediterranean) – Po (-17.5 m)

OVERALL: Net = 8.96 %; Rate = 5.88 % yr<sup>-1</sup>; Perc Final = 142 % > increase

DECADAL: NO (6 yr)

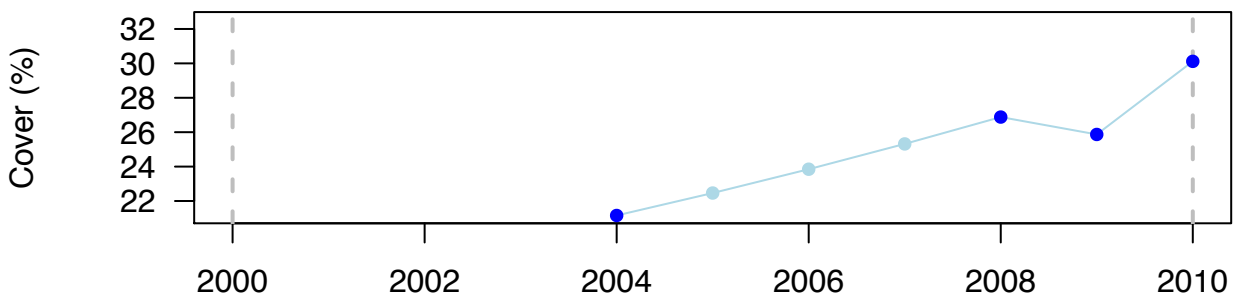

164\_density

Romero et al. 2010 (a)

SITE: Vilanova (Spain – Mediterranean) – Po (-17.5 m)

OVERALL: Net = 76.04 shoot m<sup>-2</sup>; Rate = 7.01 % yr<sup>-1</sup>; Perc Final = 152 % > increase

DECADAL: NO (6 yr)

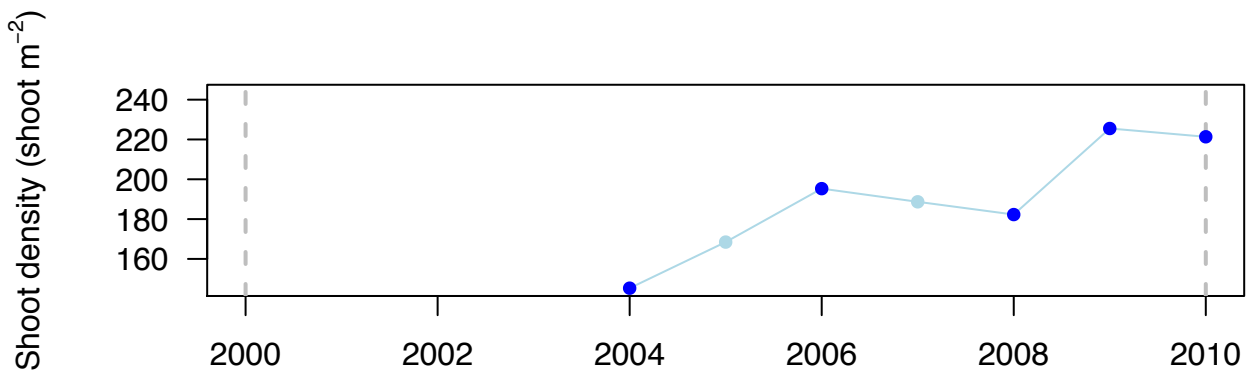

165\_cover

Romero et al. 2010 (a)

SITE: Cadaqués (Spain – Mediterranean) – Po (-13.8 m)

OVERALL: Net = 0.71 %; Rate = 1.4 % yr<sup>-1</sup>; Perc Final = 103 % > no change

DECADAL: NO (2 yr)

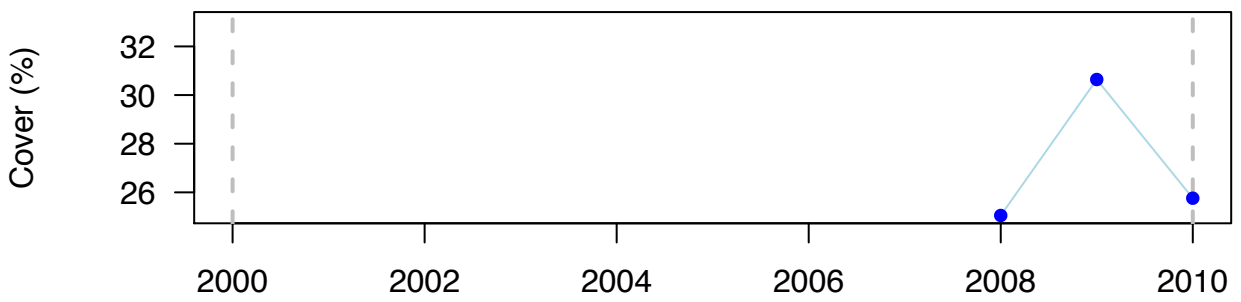

165\_density

Romero et al. 2010 (a)

SITE: Cadaqués (Spain – Mediterranean) – Po (-13.8 m)

OVERALL: Net = 93.23 shoot m<sup>-2</sup>; Rate = 34.11 % yr<sup>-1</sup>; Perc Final = 198 % > increase

DECADAL: NO (2 yr)

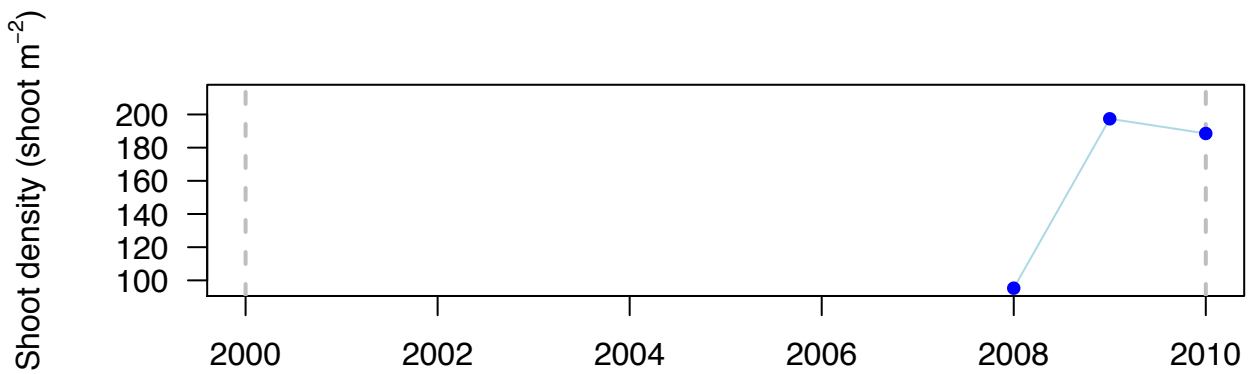



166\_area

den Hartog and Polderman 1975

SITE: Western Dutch Wadden Sea (The Netherlands – Atlantic) – Zm (-2 m)

OVERALL: Net = -7190 ha; Rate = NA % yr<sup>-1</sup>; Perc Final = NA % > decrease

DECADAL: YES (103 yr)

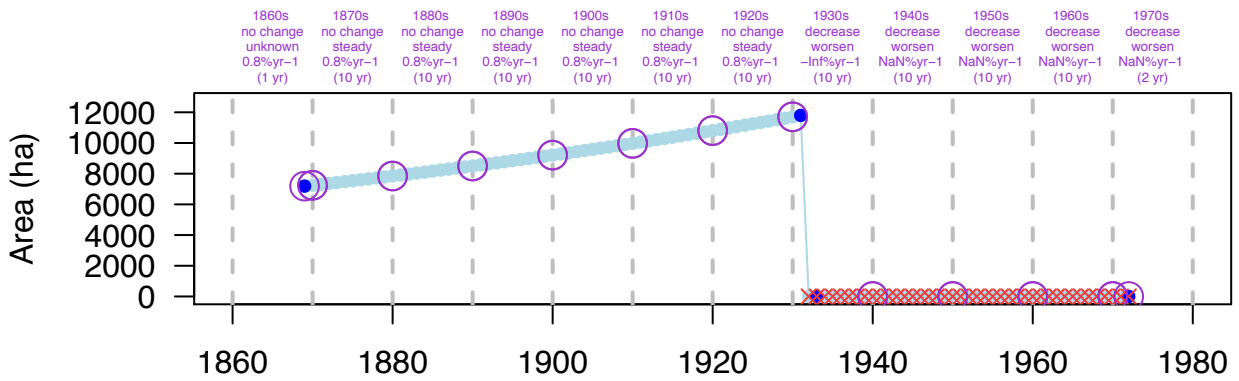

167\_cover

Ruiz et al. 2013

SITE: Cala Túnez (Spain – Mediterranean) – Po (-7 m)

OVERALL: Net = 1.06 %; Rate = 0.27 % yr<sup>-1</sup>; Perc Final = 102 % > no change

DECADAL: YES (9 yr)

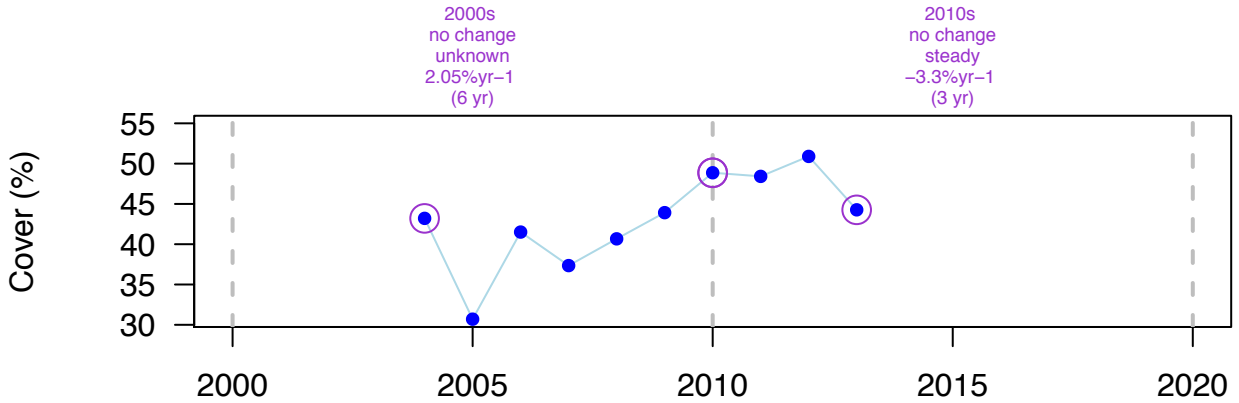

167\_density

Ruiz et al. 2013

SITE: Cala Túnez (Spain – Mediterranean) – Po (-7 m)

OVERALL: Net = 16.38 shoot m<sup>-2</sup>; Rate = 5.49 % yr<sup>-1</sup>; Perc Final = 164 % > increase

DECADAL: YES (9 yr)

Shoot density (shoot m<sup>-2</sup>)

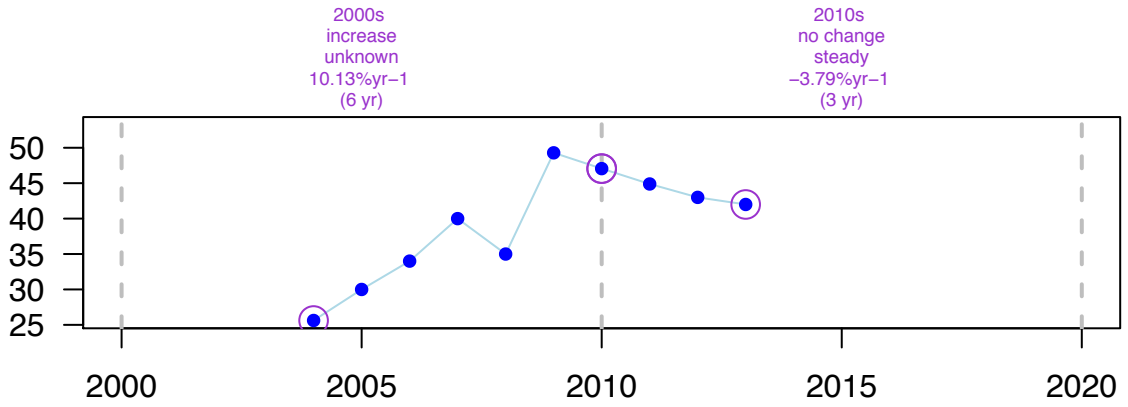

168\_cover

Ruiz et al. 2013

SITE: Cala Escalera (Spain – Mediterranean) – Po (-17 m)

OVERALL: Net = -8.44 %; Rate = -3.4 % yr<sup>-1</sup>; Perc Final = 76 % > no change

DECADAL: YES (8 yr)

Cover (%)

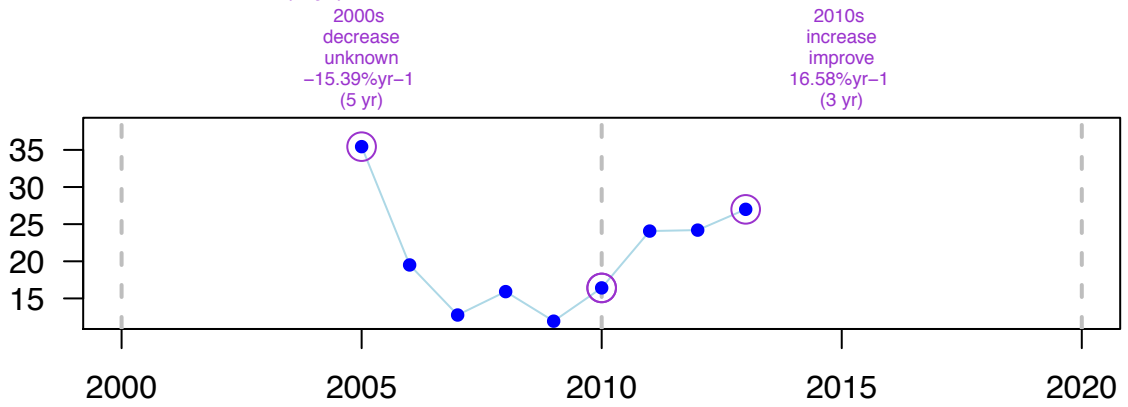

168\_density

Ruiz et al. 2013

SITE: Cala Escalera (Spain – Mediterranean) – Po (-17 m)

OVERALL: Net = 9.82 shoot m<sup>-2</sup>; Rate = 4.45 % yr<sup>-1</sup>; Perc Final = 143 % > increase

DECADAL: YES (8 yr)

Shoot density (shoot m<sup>-2</sup>)

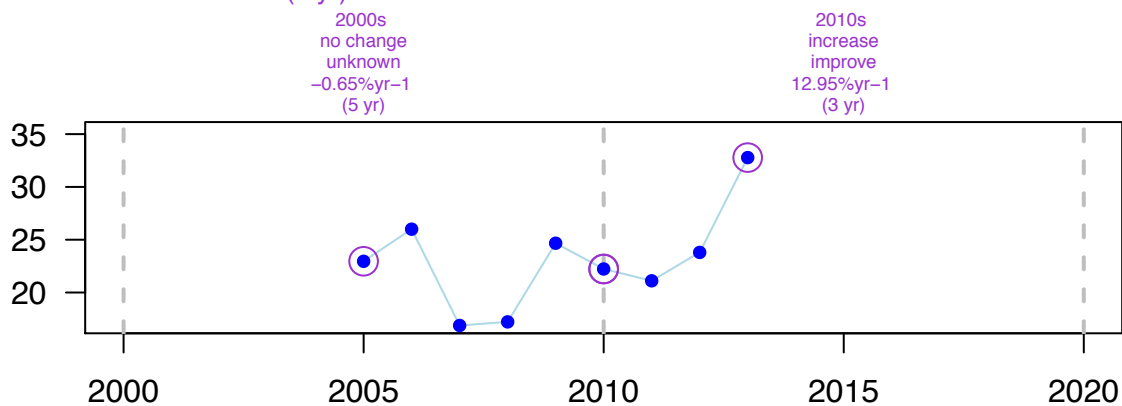

169\_cover

Ruiz et al. 2013

SITE: Cala Escalera (Spain – Mediterranean) – Po (-7 m)

OVERALL: Net = 3.59 %; Rate = 0.79 % yr<sup>-1</sup>; Perc Final = 107 % > no change

DECADAL: YES (9 yr)

Cover (%)

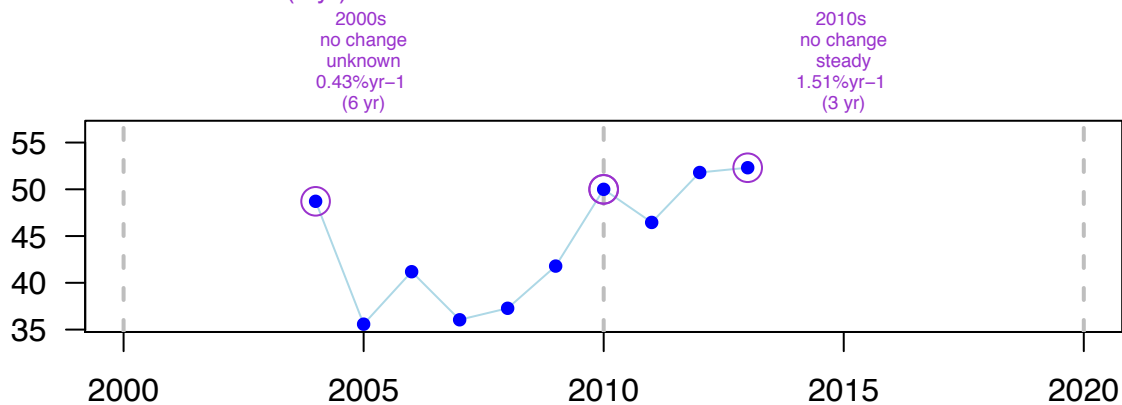

169\_density

Ruiz et al. 2013

SITE: Cala Escalera (Spain – Mediterranean) – Po (-7 m)

OVERALL: Net = 21.07 shoot m<sup>-2</sup>; Rate = 5.39 % yr<sup>-1</sup>; Perc Final = 163 % > increase

DECADAL: YES (9 yr)

Shoot density (shoot m<sup>-2</sup>)

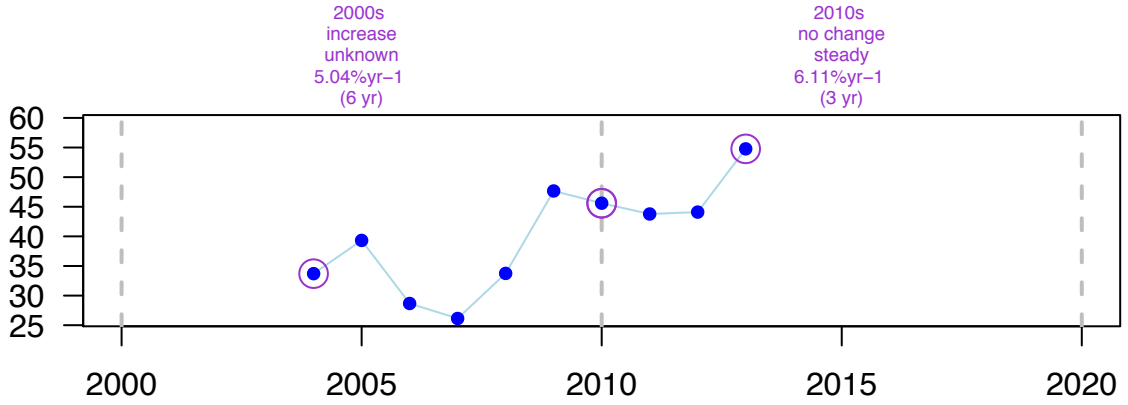

170\_cover

Ruiz et al. 2013

SITE: Cala Cerrada (Spain – Mediterranean) – Po (-22 m)

OVERALL: Net = -7.25 %; Rate = -5.07 % yr<sup>-1</sup>; Perc Final = 63 % > decrease

DECADAL: YES (9 yr)

Cover (%)

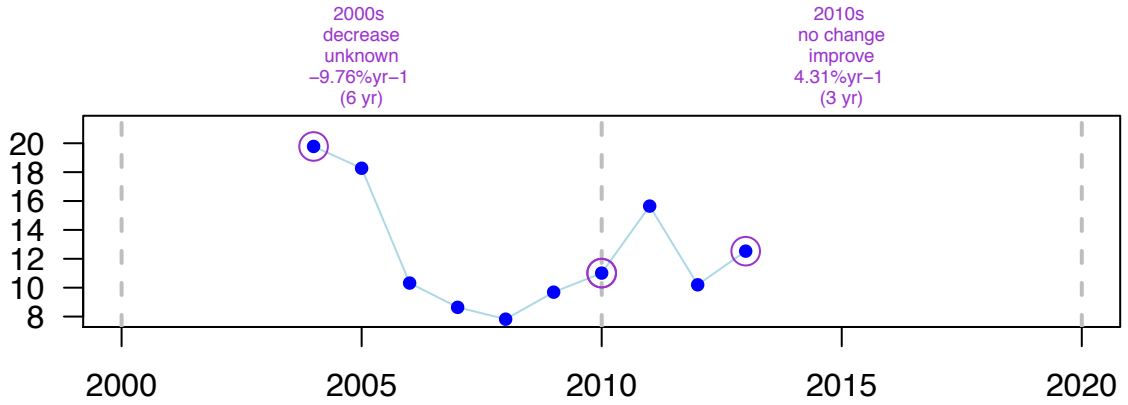

170\_density

Ruiz et al. 2013

SITE: Cala Cerrada (Spain – Mediterranean) – Po (-22 m)

OVERALL: Net = -3.74 shoot m<sup>-2</sup>; Rate = -3.43 % yr<sup>-1</sup>; Perc Final = 73 % > decrease

DECADAL: YES (9 yr)

Shoot density (shoot m<sup>-2</sup>)

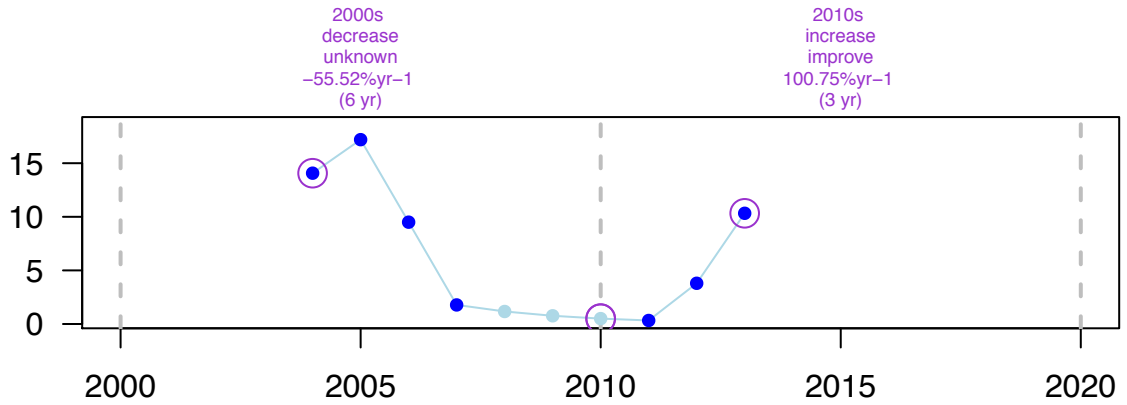

171\_cover

Ruiz et al. 2013

SITE: Cala Cerrada (Spain – Mediterranean) – Po (-12 m)

OVERALL: Net = -3.08 %; Rate = -1.39 % yr<sup>-1</sup>; Perc Final = 88 % > no change

DECADAL: YES (9 yr)

Cover (%)

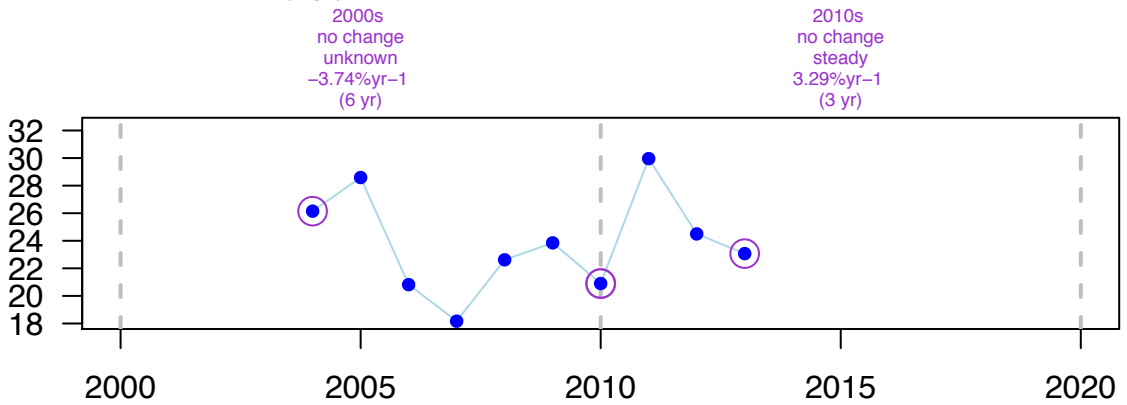

171\_density

Ruiz et al. 2013

SITE: Cala Cerrada (Spain – Mediterranean) – Po (-12 m)

OVERALL: Net = -0.88 shoot m<sup>-2</sup>; Rate = -0.4 % yr<sup>-1</sup>; Perc Final = 96 % > no change

DECADAL: YES (9 yr)

Shoot density (shoot m<sup>-2</sup>)

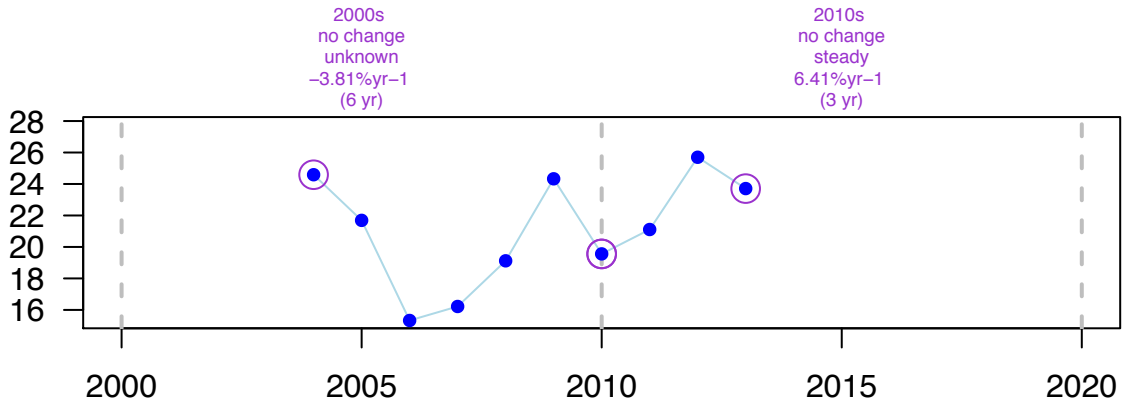

172\_cover

Ruiz et al. 2013

SITE: La Azohía (Spain – Mediterranean) – Po (-17 m)

OVERALL: Net = 0.39 %; Rate = 0.16 % yr<sup>-1</sup>; Perc Final = 101 % > no change

DECADAL: YES (9 yr)

Cover (%)

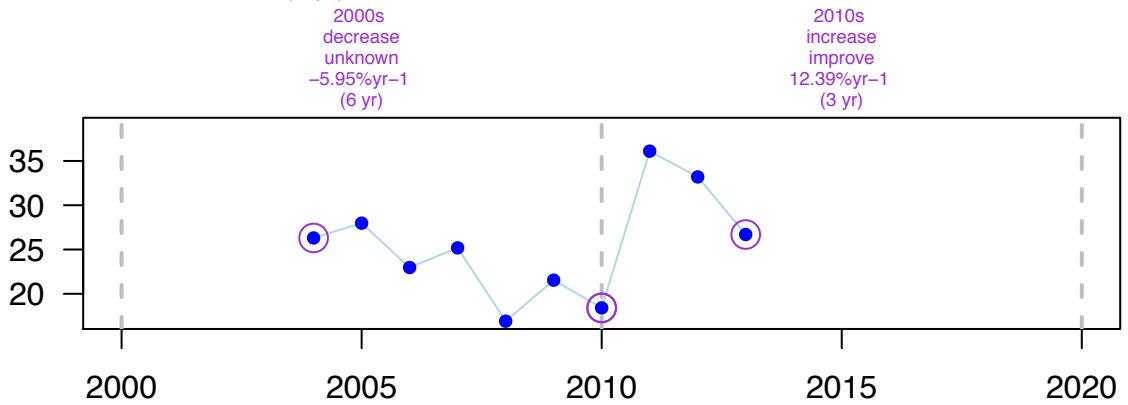

172\_density

Ruiz et al. 2013

SITE: La Azohía (Spain – Mediterranean) – Po (-17 m)

OVERALL: Net = 5.6 shoot m<sup>-2</sup>; Rate = 2.57 % yr<sup>-1</sup>; Perc Final = 126 % > increase

DECADAL: YES (9 yr)

Shoot density (shoot m<sup>-2</sup>)

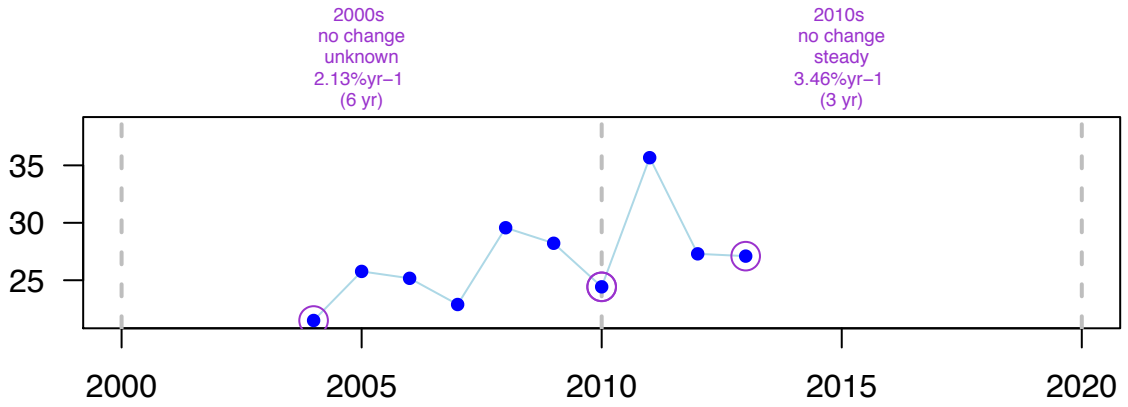

173\_cover

Ruiz et al. 2013

SITE: Isla Plana (levante) (Spain – Mediterranean) – Po (-6 m)

OVERALL: Net = 10.61 %; Rate = 3.24 % yr<sup>-1</sup>; Perc Final = 134 % > increase

DECADAL: YES (9 yr)

Cover (%)

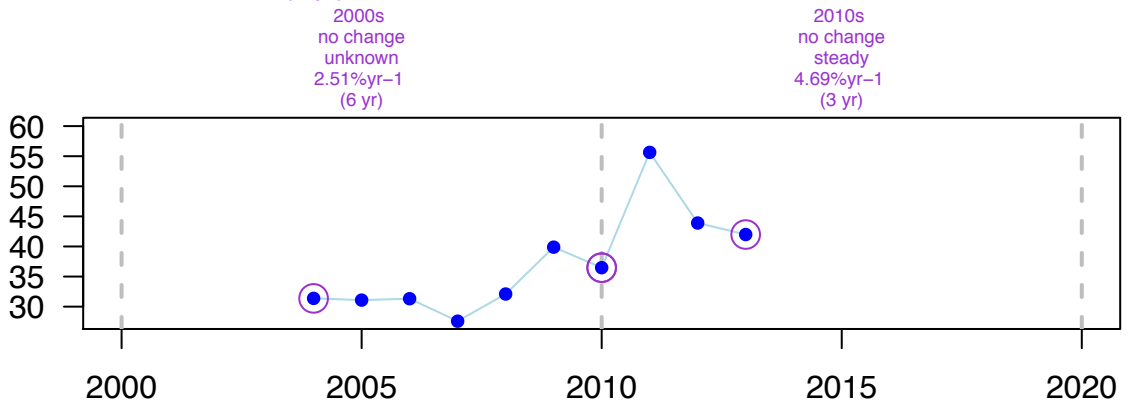

173\_density

Ruiz et al. 2013

SITE: Isla Plana (levante) (Spain – Mediterranean) – Po (-6 m)

OVERALL: Net = 6.51 shoot m<sup>-2</sup>; Rate = 2.6 % yr<sup>-1</sup>; Perc Final = 126 % > increase

DECADAL: YES (9 yr)

Shoot density (shoot m<sup>-2</sup>)

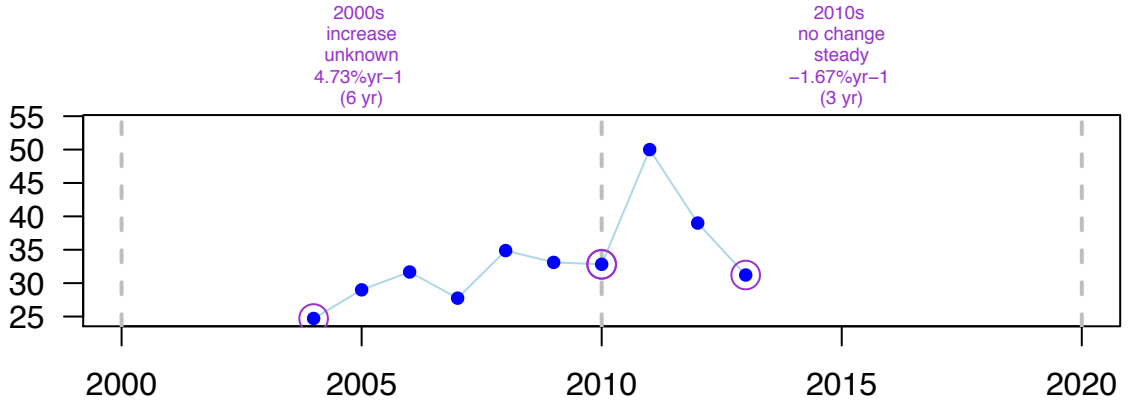

174\_cover

Ruiz et al. 2013

SITE: Calabardina (Cueva de la Virgen) (Spain – Mediterranean) – Po (-14 m)

OVERALL: Net = -3.28 %; Rate = -1.66 % yr<sup>-1</sup>; Perc Final = 86 % > no change

DECADAL: YES (9 yr)

Cover (%)

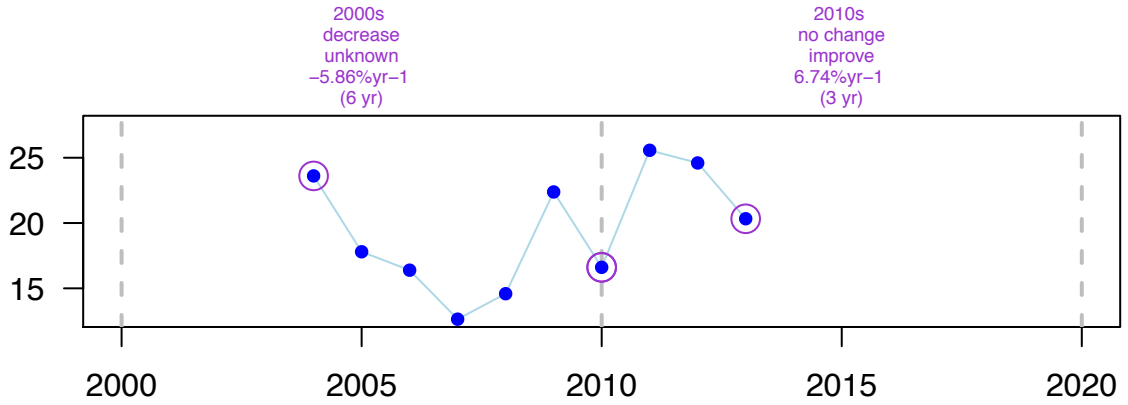



174\_density

Ruiz et al. 2013

SITE: Calabardina (Cueva de la Virgen) (Spain – Mediterranean) – Po (-14 m)

OVERALL: Net = -1.21 shoot m<sup>-2</sup>; Rate = -0.51 % yr<sup>-1</sup>; Perc Final = 95 % > no change

DECADAL: YES (9 yr)

Shoot density (shoot m<sup>-2</sup>)

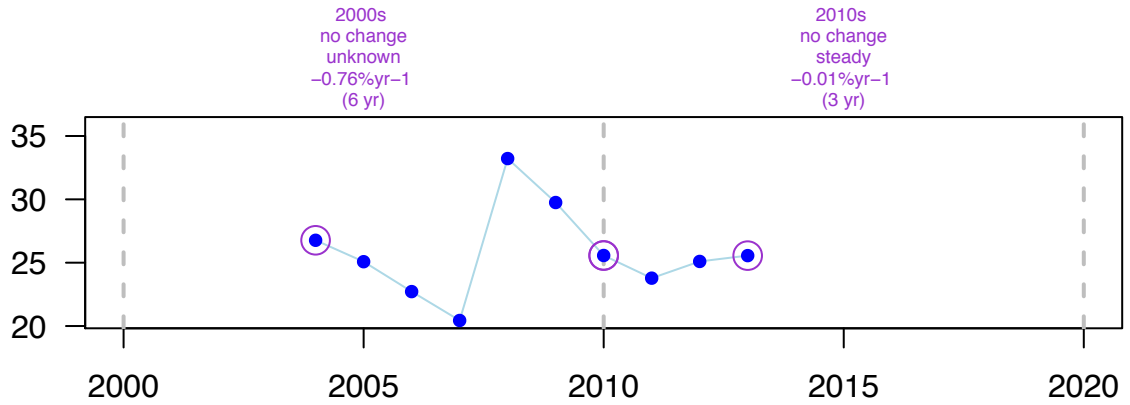

175\_cover

Ruiz et al. 2013

SITE: Isla del Fraile (Spain – Mediterranean) – Po (-14 m)

OVERALL: Net = 7.3 %; Rate = 2.93 % yr<sup>-1</sup>; Perc Final = 130 % > increase

DECADAL: YES (9 yr)

Cover (%)

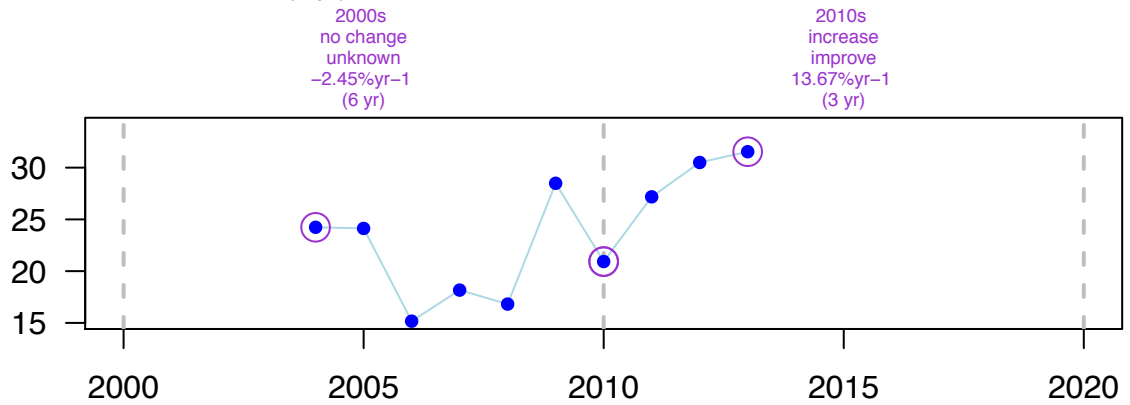

175\_density

Ruiz et al. 2013

SITE: Isla del Fraile (Spain – Mediterranean) – Po (-14 m)

OVERALL: Net = -8.08 shoot m<sup>-2</sup>; Rate = -3.52 % yr<sup>-1</sup>; Perc Final = 73 % > decrease

DECADAL: YES (9 yr)

Shoot density (shoot m<sup>-2</sup>)

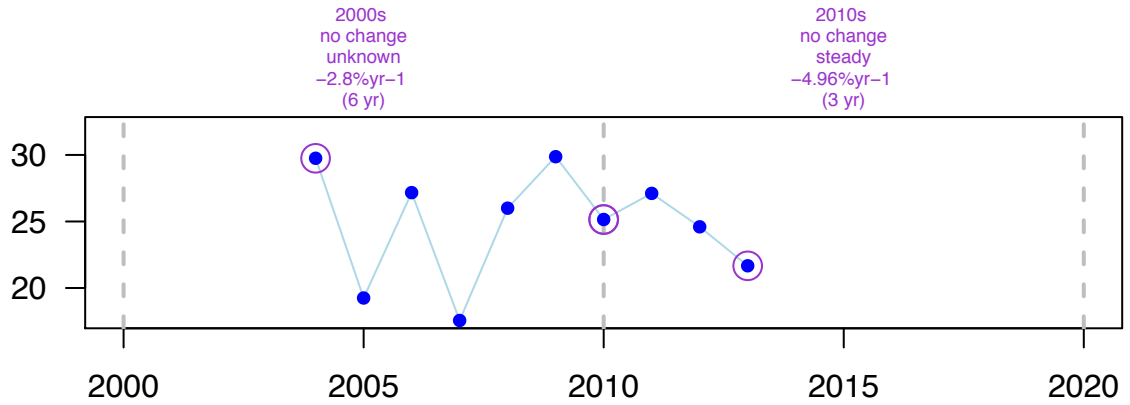

176\_cover

Ruiz et al. 2013

SITE: Isla Plana (poniente) (Spain – Mediterranean) – Po (-2 m)

OVERALL: Net = 13.27 %; Rate = 2.44 % yr<sup>-1</sup>; Perc Final = 125 % > no change

DECADAL: YES (9 yr)

Cover (%)

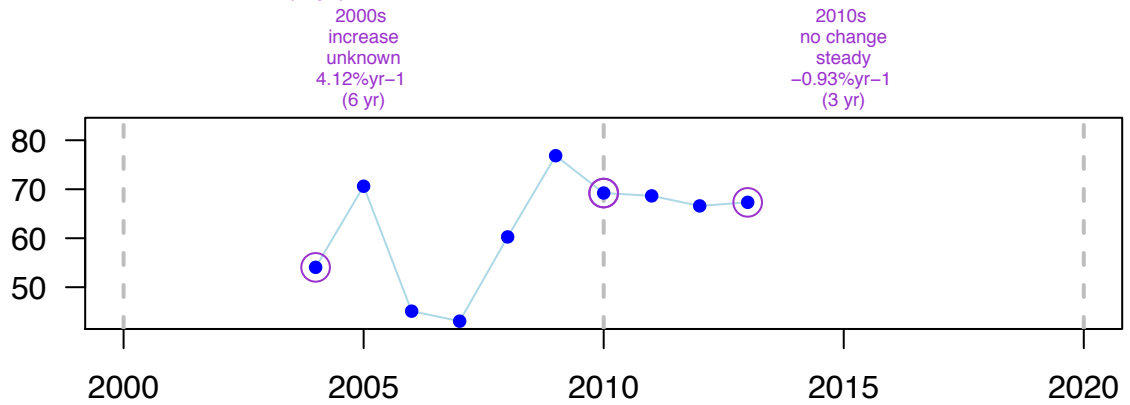

176\_density

Ruiz et al. 2013

SITE: Isla Plana (poniente) (Spain – Mediterranean) – Po (-2 m)

OVERALL: Net = 8.34 shoot m<sup>-2</sup>; Rate = 1.66 % yr<sup>-1</sup>; Perc Final = 116 % > no change

DECADAL: YES (9 yr)

Shoot density (shoot m<sup>-2</sup>)

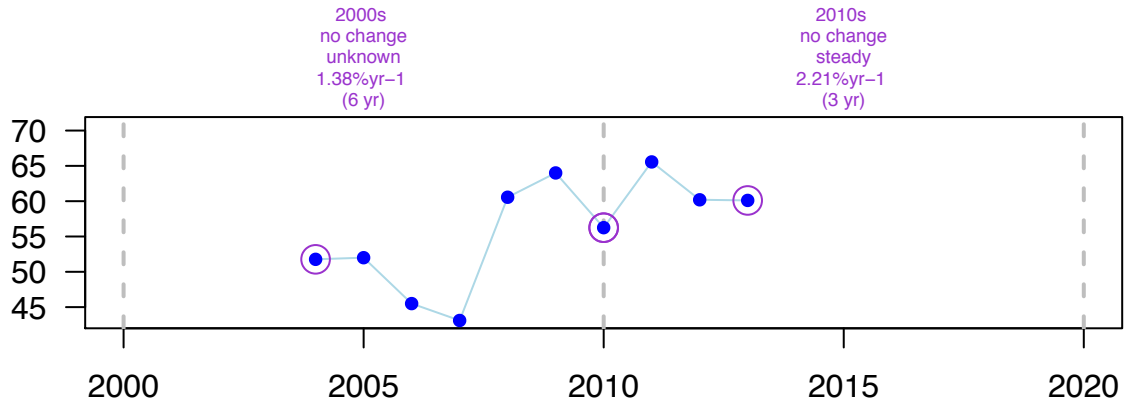

177\_cover

Ruiz et al. 2013

SITE: Isla Grosa (Spain – Mediterranean) – Po (-4 m)

OVERALL: Net = 17.78 %; Rate = 4.95 % yr<sup>-1</sup>; Perc Final = 149 % > increase

DECADAL: YES (8 yr)

Cover (%)

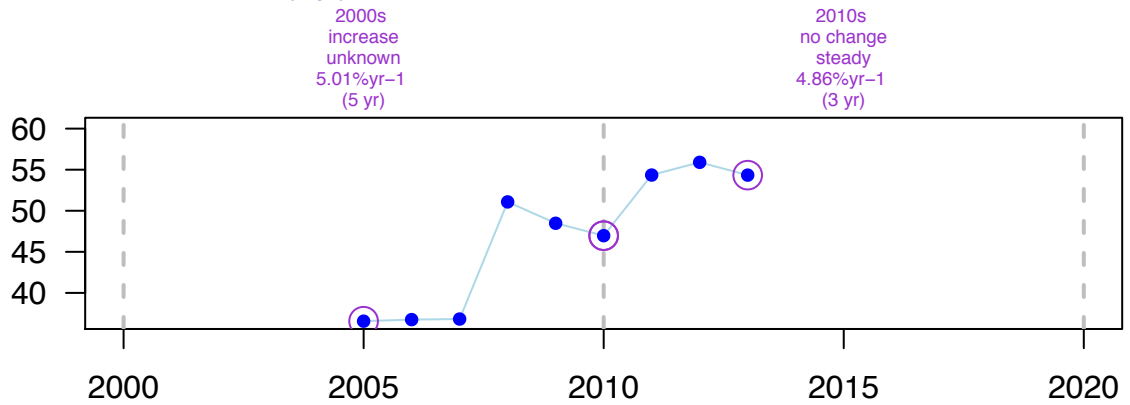

177\_density

Ruiz et al. 2013

SITE: Isla Grosa (Spain – Mediterranean) – Po (-4 m)

OVERALL: Net = 6.74 shoot m<sup>-2</sup>; Rate = 2.44 % yr<sup>-1</sup>; Perc Final = 119 % > no change

DECADAL: NO (7 yr)

Shoot density (shoot m<sup>-2</sup>)

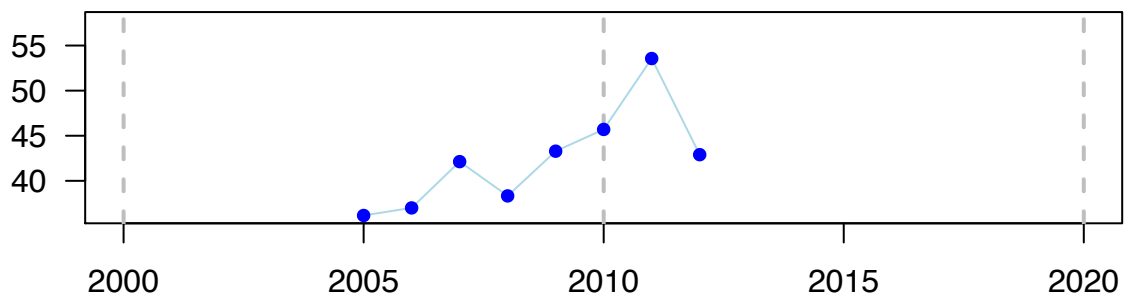

178\_cover

Ruiz et al. 2013

SITE: Isla Grosa (Spain – Mediterranean) – Po (-12 m)

OVERALL: Net = 9.08 %; Rate = 4.57 % yr<sup>-1</sup>; Perc Final = 132 % > increase

DECADAL: NO (6 yr)

Cover (%)

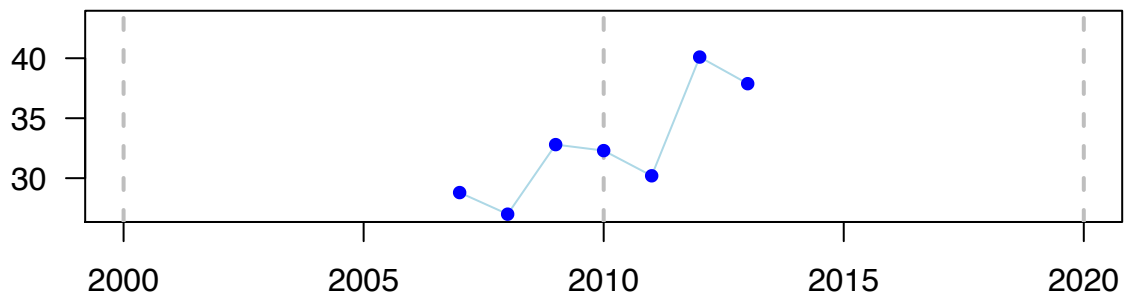

178\_density

Ruiz et al. 2013

SITE: Isla Grosa (Spain – Mediterranean) – Po (-12 m)

OVERALL: Net = -1.67 shoot m<sup>-2</sup>; Rate = -1.06 % yr<sup>-1</sup>; Perc Final = 94 % > no change

DECADAL: NO (6 yr)

Shoot density (shoot m<sup>-2</sup>)

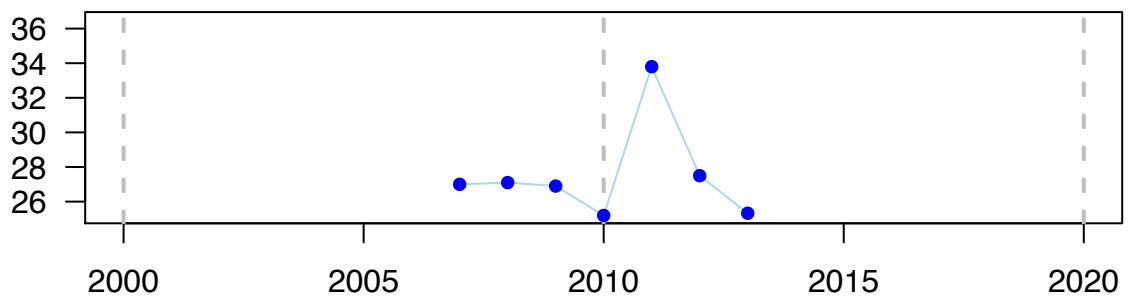

179\_cover

Ruiz et al. 2013

SITE: Puerto de Tomás Maestre (Spain – Mediterranean) – Po (-4 m)

OVERALL: Net = -1.82 %; Rate = -0.47 % yr<sup>-1</sup>; Perc Final = 96 % > no change

DECADAL: YES (8 yr)

Cover (%)

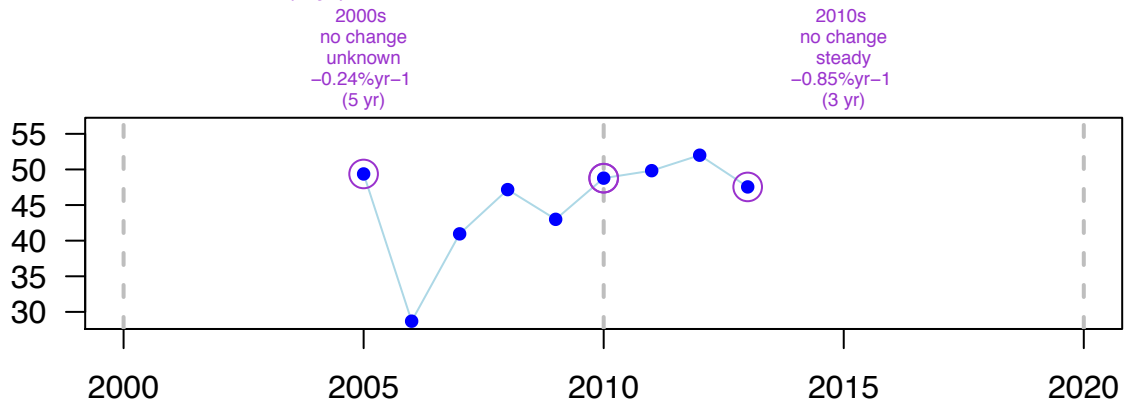

179\_density

Ruiz et al. 2013

SITE: Puerto de Tomás Maestre (Spain – Mediterranean) – Po (-4 m)

OVERALL: Net = 8.68 shoot m<sup>-2</sup>; Rate = 2.73 % yr<sup>-1</sup>; Perc Final = 124 % > no change

DECADAL: YES (8 yr)

Shoot density (shoot m<sup>-2</sup>)

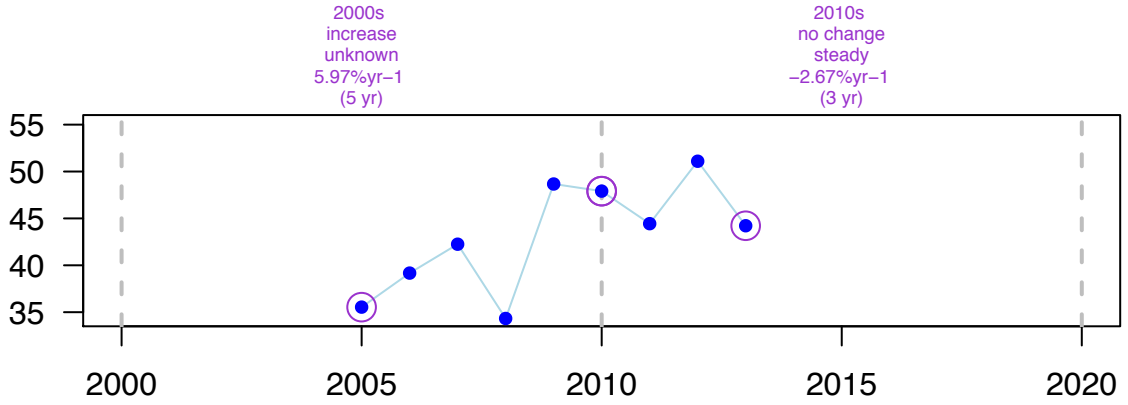

180\_cover

Ruiz et al. 2013

SITE: Isla de las Palomas (Spain – Mediterranean) – Po (-17 m)

OVERALL: Net = 0.33 %; Rate = 0.25 % yr<sup>-1</sup>; Perc Final = 102 % > no change

DECADAL: NO (7 yr)

Cover (%)

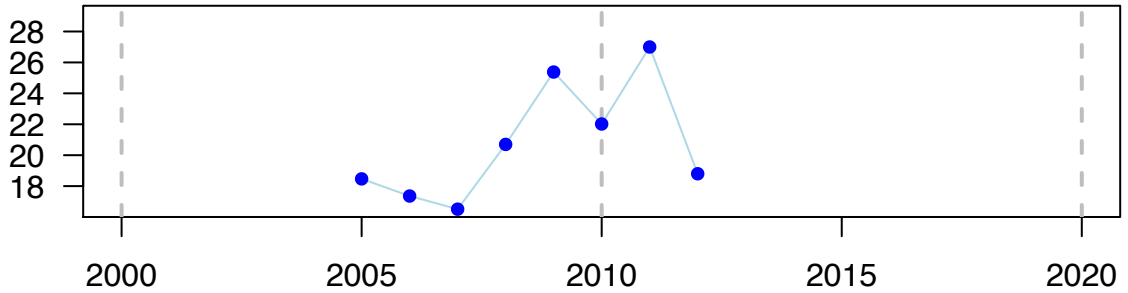

180\_density

Ruiz et al. 2013

SITE: Isla de las Palomas (Spain – Mediterranean) – Po (-17 m)

OVERALL: Net = -2.53 shoot m<sup>-2</sup>; Rate = -1.8 % yr<sup>-1</sup>; Perc Final = 88 % > no change

DECADAL: NO (7 yr)

Shoot density (shoot m<sup>-2</sup>)

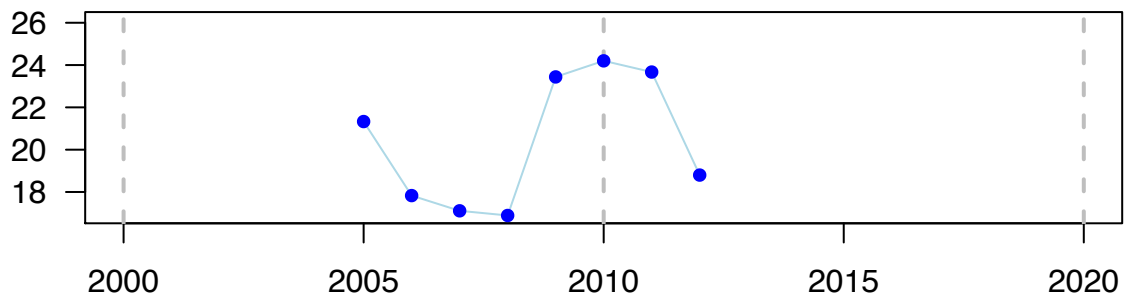

181\_cover

Ruiz et al. 2013

SITE: Cala Reona (Spain – Mediterranean) – Po (-6 m)

OVERALL: Net = 0.09 %; Rate = 0.04 % yr<sup>-1</sup>; Perc Final = 100 % > no change

DECADAL: NO (7 yr)

Cover (%)

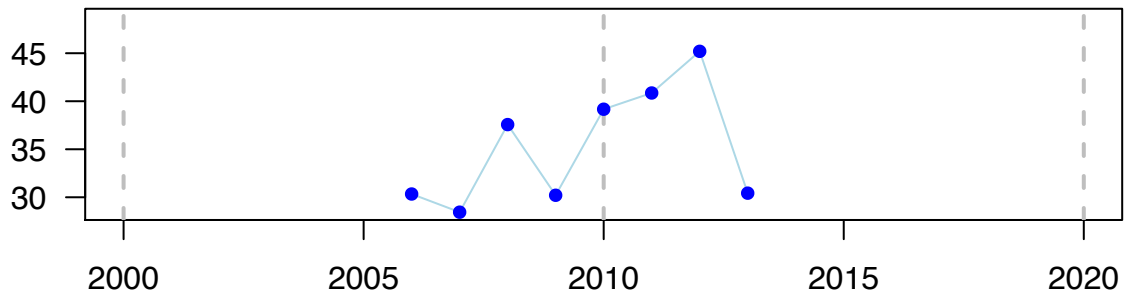

181\_density

Ruiz et al. 2013

SITE: Cala Reona (Spain – Mediterranean) – Po (-6 m)

OVERALL: Net = 0.87 shoot m<sup>-2</sup>; Rate = 0.29 % yr<sup>-1</sup>; Perc Final = 102 % > no change

DECADAL: NO (7 yr)

Shoot density (shoot m<sup>-2</sup>)

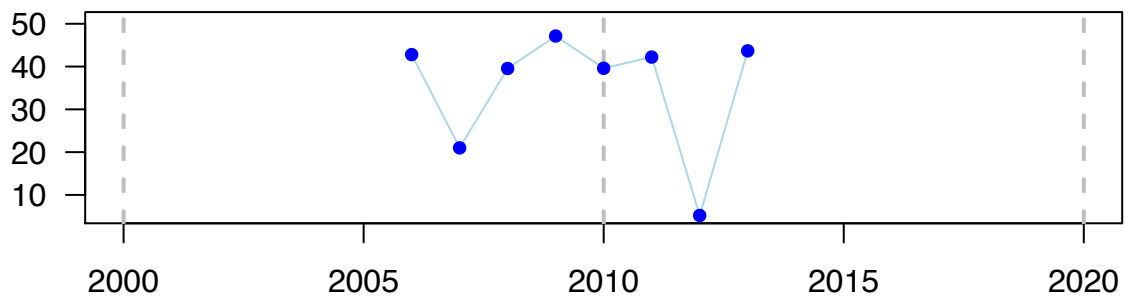

182\_cover

Ruiz et al. 2013

SITE: Calblanque (Spain – Mediterranean) – Po (-26 m)

OVERALL: Net = 7.34 %; Rate = 11.48 % yr<sup>-1</sup>; Perc Final = 199 % > increase

DECADAL: NO (6 yr)

Cover (%)

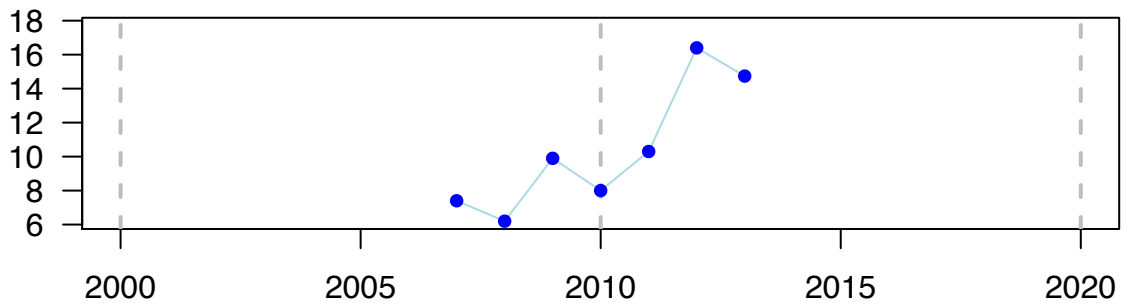



182\_density

Ruiz et al. 2013

SITE: Calblanque (Spain – Mediterranean) – Po (-26 m)

OVERALL: Net = 9.35 shoot m<sup>-2</sup>; Rate = 8.82 % yr<sup>-1</sup>; Perc Final = 170 % > increase

DECADAL: NO (6 yr)

Shoot density (shoot m<sup>-2</sup>)

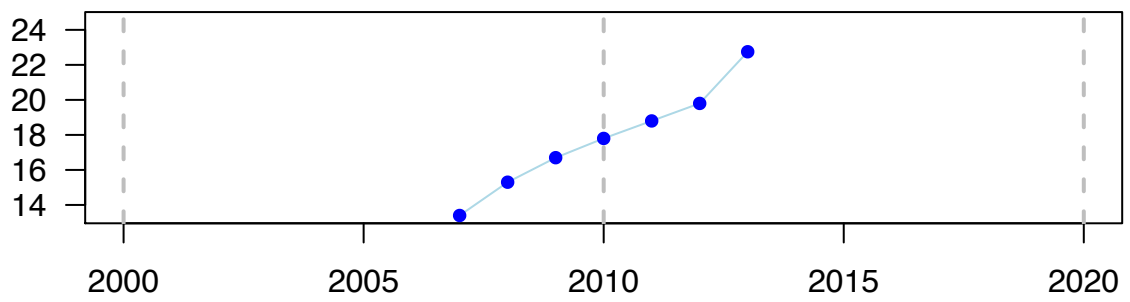

183\_cover

Ruiz et al. 2013

SITE: El Muellecico (Cabo Tiñoso) (Spain – Mediterranean) – Po (-22 m)

OVERALL: Net = 8.08 %; Rate = 10.34 % yr<sup>-1</sup>; Perc Final = 186 % > increase

DECADAL: NO (6 yr)

Cover (%)

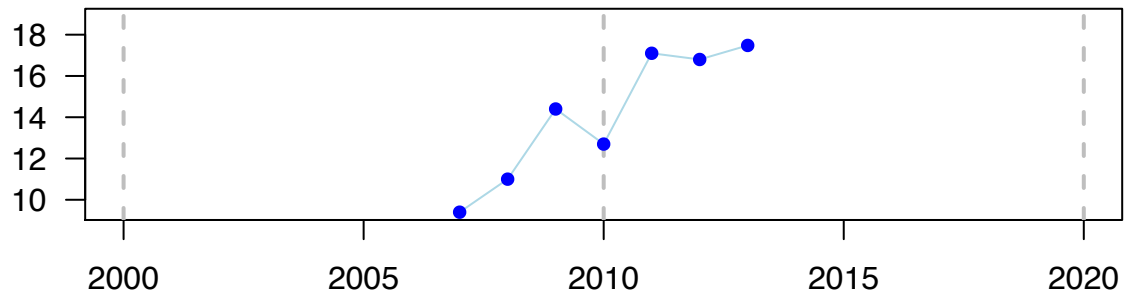

183\_density

Ruiz et al. 2013

SITE: El Muellecico (Cabo Tiñoso) (Spain – Mediterranean) – Po (-22 m)

OVERALL: Net = 4.57 shoot m<sup>-2</sup>; Rate = 4.28 % yr<sup>-1</sup>; Perc Final = 129 % > increase

DECADAL: NO (6 yr)

Shoot density (shoot m<sup>-2</sup>)

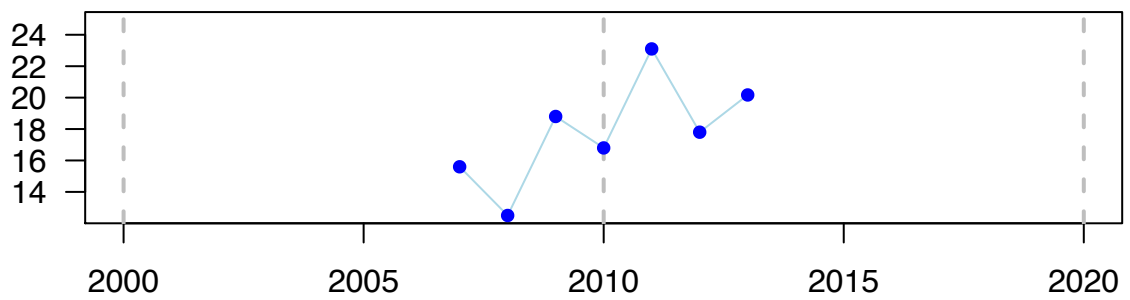

184\_density

Marbà and Duarte 2010, Duarte and Marbà (unpublished)

SITE: El Castell (Spain – Mediterranean) – Po (-5 m)

OVERALL: Net = -456 shoot m<sup>-2</sup>; Rate = -9.06 % yr<sup>-1</sup>; Perc Final = 37 % > decrease

DECADAL: YES (11 yr)

Shoot density (shoot m<sup>-2</sup>)

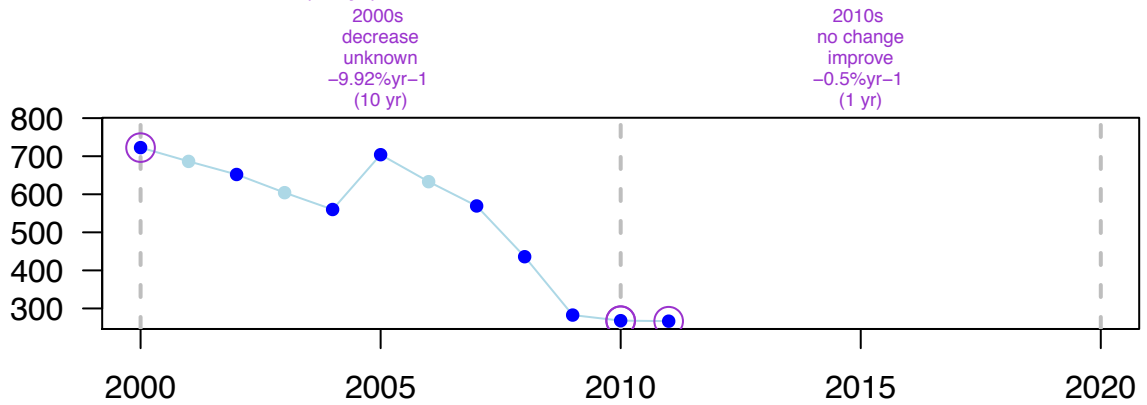

185\_density

Marbà and Duarte 2010, Duarte and Marbà (unpublished)

SITE: Cala Santa María (Spain – Mediterranean) – Po (-13.1 m)

OVERALL: Net = -525.47 shoot m<sup>-2</sup>; Rate = -10.64 % yr<sup>-1</sup>; Perc Final = 31 % > decrease

DECADAL: YES (11 yr)

Shoot density (shoot m<sup>-2</sup>)

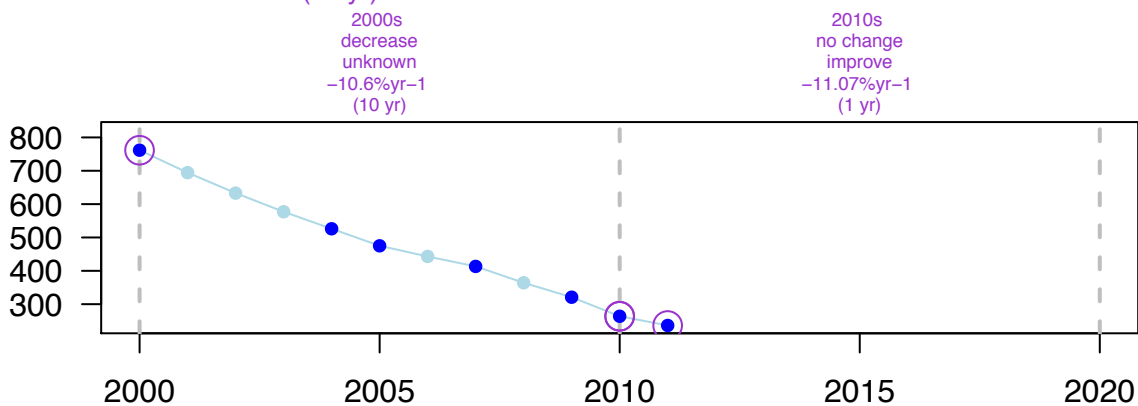

186\_density

Duarte and Marbà (unpublished)

SITE: Mooring 22 (Spain – Mediterranean) – Po (-17 m)

OVERALL: Net = -142.73 shoot m<sup>-2</sup>; Rate = -5.37 % yr<sup>-1</sup>; Perc Final = 55 % > decrease

DECADAL: YES (11 yr)

Shoot density (shoot m<sup>-2</sup>)

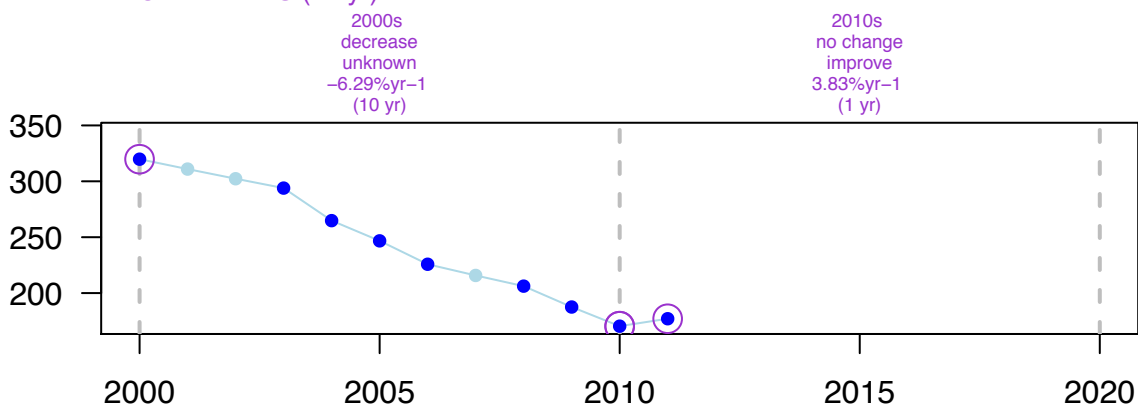

187\_density

Duarte and Marbà (unpublished)

SITE: Porto Colom (Spain – Mediterranean) – Po (-6.4 m)

OVERALL: Net = 140 shoot m<sup>-2</sup>; Rate = 2.91 % yr<sup>-1</sup>; Perc Final = 134 % > increase

DECADAL: YES (10 yr)

Shoot density (shoot m<sup>-2</sup>)

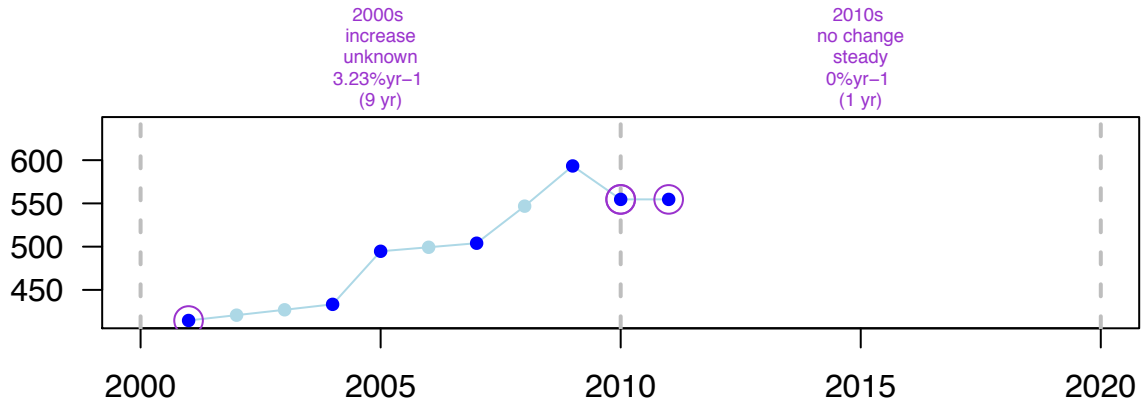

188\_density

Duarte and Marbà (unpublished)

SITE: Pollença (Spain – Mediterranean) – Po (-4.1 m)

OVERALL: Net = -21.77 shoot m<sup>-2</sup>; Rate = -0.28 % yr<sup>-1</sup>; Perc Final = 97 % > no change

DECADAL: YES (10 yr)

Shoot density (shoot m<sup>-2</sup>)

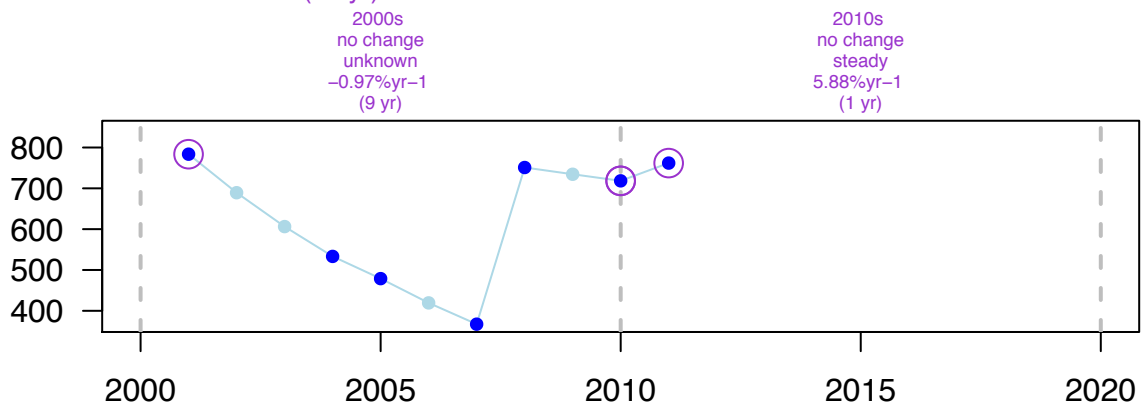

189\_density

Duarte and Marbà (unpublished)

SITE: Cap Salines (Spain – Mediterranean) – Po (-25.5 m)

OVERALL: Net = -41.67 shoot m<sup>-2</sup>; Rate = -1.14 % yr<sup>-1</sup>; Perc Final = 89 % > no change

DECADAL: YES (10 yr)

Shoot density (shoot m<sup>-2</sup>)

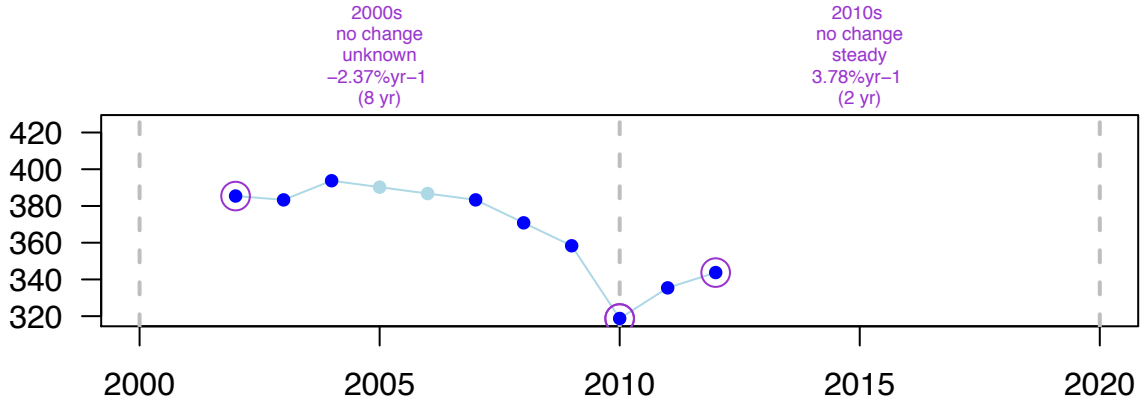

190\_density

Duarte and Marbà (unpublished)

SITE: Cala Millor (Spain – Mediterranean) – Po (-6.5 m)

OVERALL: Net = 83.34 shoot m<sup>-2</sup>; Rate = 1.4 % yr<sup>-1</sup>; Perc Final = 113 % > no change

DECADAL: YES (9 yr)

Shoot density (shoot m<sup>-2</sup>)

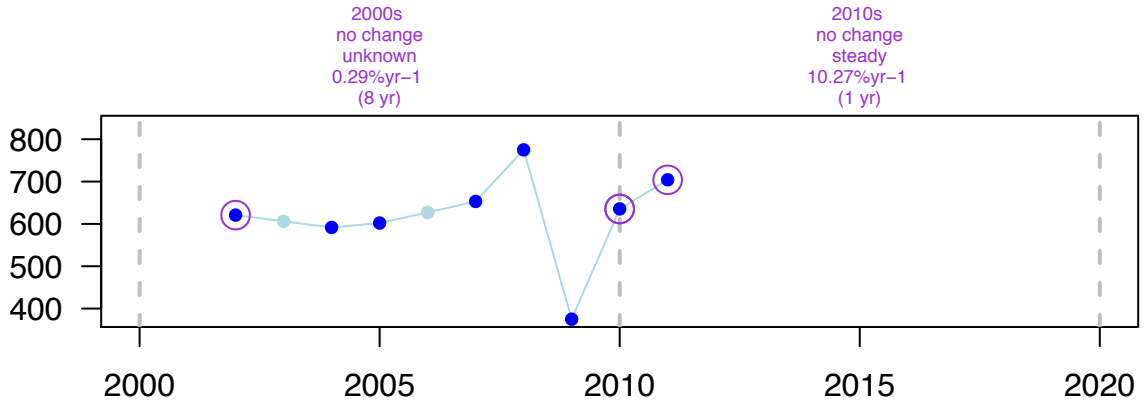

191\_density

Duarte and Marbà (unpublished)

SITE: Can Picafort (Spain – Mediterranean) – Po (-10 m)

OVERALL: Net = -197.33 shoot m<sup>-2</sup>; Rate = -4.32 % yr<sup>-1</sup>; Perc Final = 68 % > decrease

DECADAL: YES (9 yr)

Shoot density (shoot m<sup>-2</sup>)

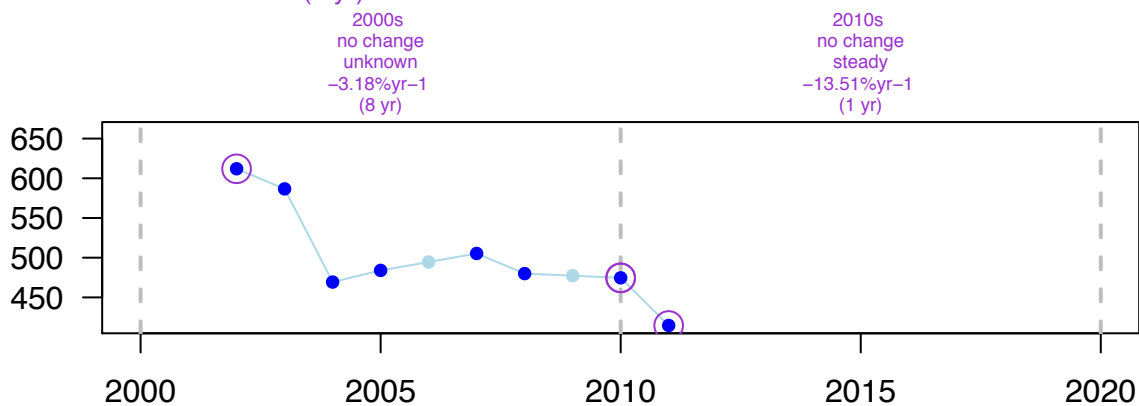

192\_density

Duarte and Marbà (unpublished)

SITE: Es Cargol (Spain – Mediterranean) – Po (-6 m)

OVERALL: Net = 49.71 shoot m<sup>-2</sup>; Rate = 0.8 % yr<sup>-1</sup>; Perc Final = 105 % > no change

DECADAL: NO (6 yr)

Shoot density (shoot m<sup>-2</sup>)

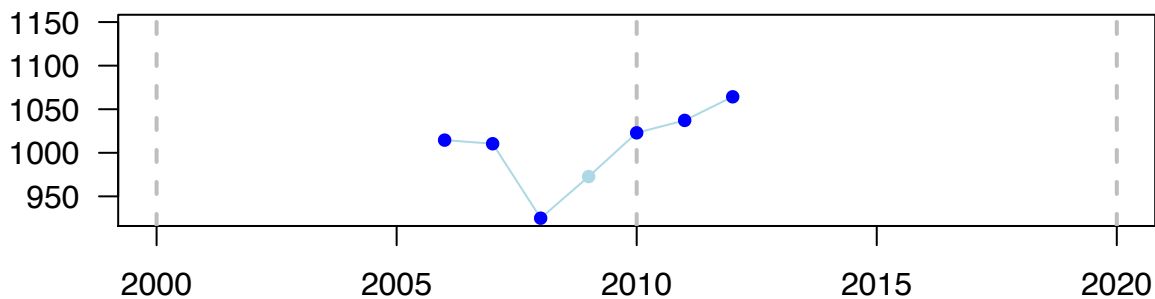

193\_density

Duarte and Marbà (unpublished)

SITE: Fornells (Spain – Mediterranean) – Po (-6.8 m)

OVERALL: Net = -443.75 shoot m<sup>-2</sup>; Rate = -8.04 % yr<sup>-1</sup>; Perc Final = 53 % > decrease

DECADAL: YES (8 yr)

Shoot density (shoot m<sup>-2</sup>)

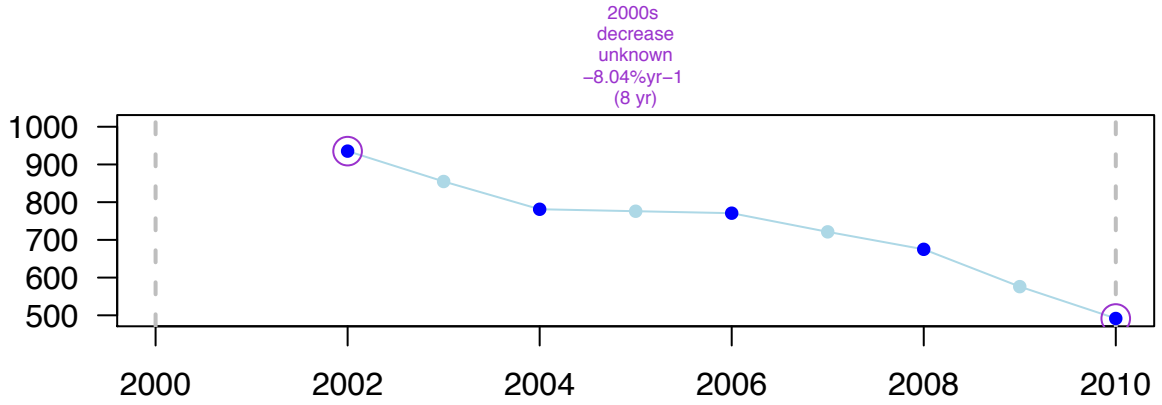

194\_density

Duarte and Marbà (unpublished)

SITE: Cala d'Or (Spain – Mediterranean) – Po (-7 m)

OVERALL: Net = 15.34 shoot m<sup>-2</sup>; Rate = 0.54 % yr<sup>-1</sup>; Perc Final = 104 % > no change

DECADAL: YES (8 yr)

Shoot density (shoot m<sup>-2</sup>)

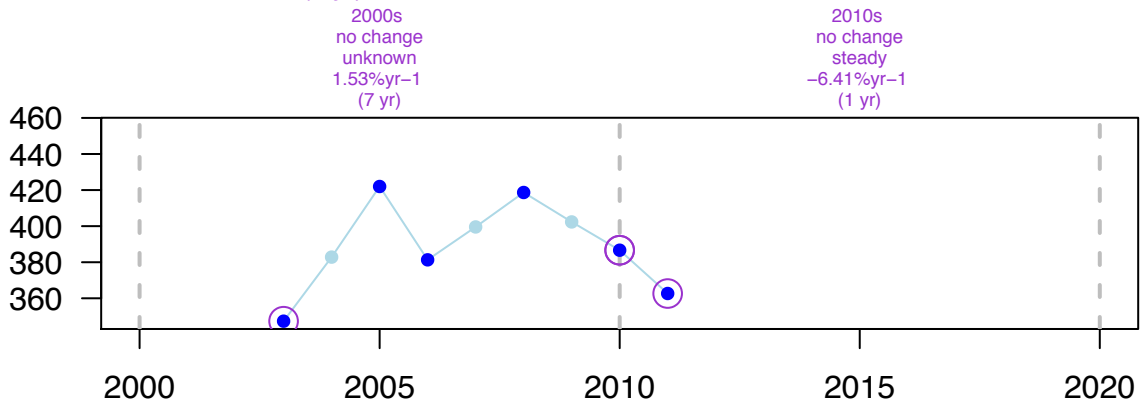

195\_density

Duarte and Marbà (unpublished)

SITE: Cala Torreta (Spain – Mediterranean) – Po (-7.6 m)

OVERALL: Net = -180.24 shoot m<sup>-2</sup>; Rate = -3.81 % yr<sup>-1</sup>; Perc Final = 68 % > decrease

DECADAL: YES (10 yr)

Shoot density (shoot m<sup>-2</sup>)

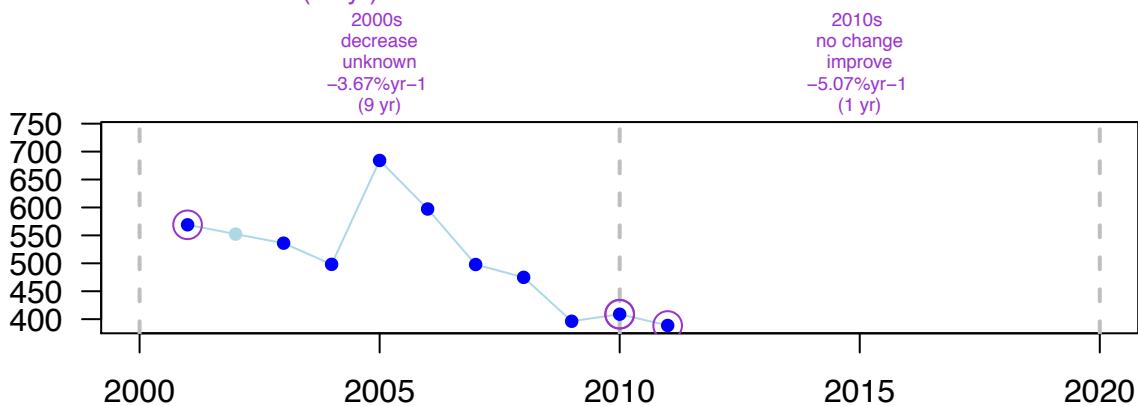

196\_density

Duarte and Marbà (unpublished)

SITE: Illetes (Spain – Mediterranean) – Po (-5 m)

OVERALL: Net = 45.83 shoot m<sup>-2</sup>; Rate = 0.66 % yr<sup>-1</sup>; Perc Final = 107 % > no change

DECADAL: YES (10 yr)

Shoot density (shoot m<sup>-2</sup>)

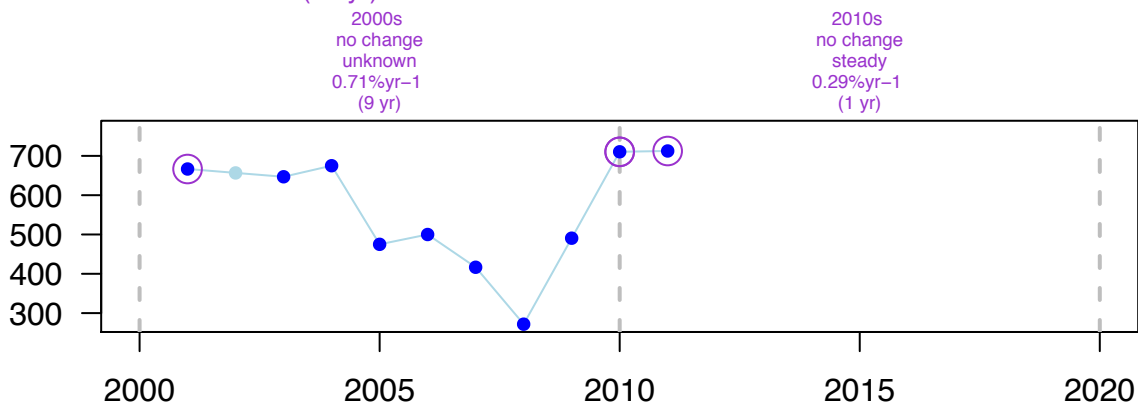



197\_density

Duarte and Marbà (unpublished)

SITE: Els Pujols (Spain – Mediterranean) – Po (-4 m)

OVERALL: Net = 68.75 shoot m<sup>-2</sup>; Rate = 0.88 % yr<sup>-1</sup>; Perc Final = 109 % > no change

DECADAL: YES (10 yr)

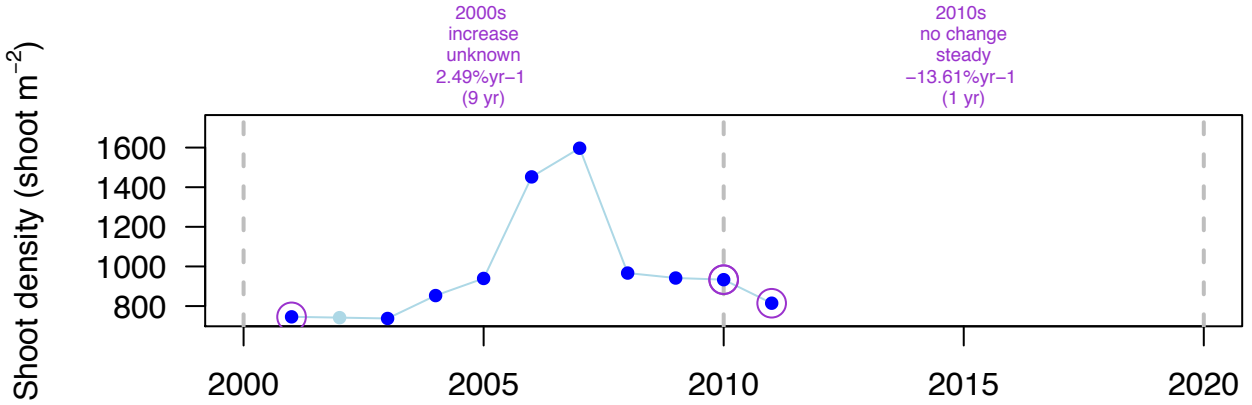

198\_cover

González-Correa et al. 2015

SITE: Isla de Tabarca (Spain – Mediterranean) – Po (-4 m)

OVERALL: Net = -34 %; Rate = -2.65 % yr<sup>-1</sup>; Perc Final = 56 % > decrease

DECADAL: YES (22 yr)

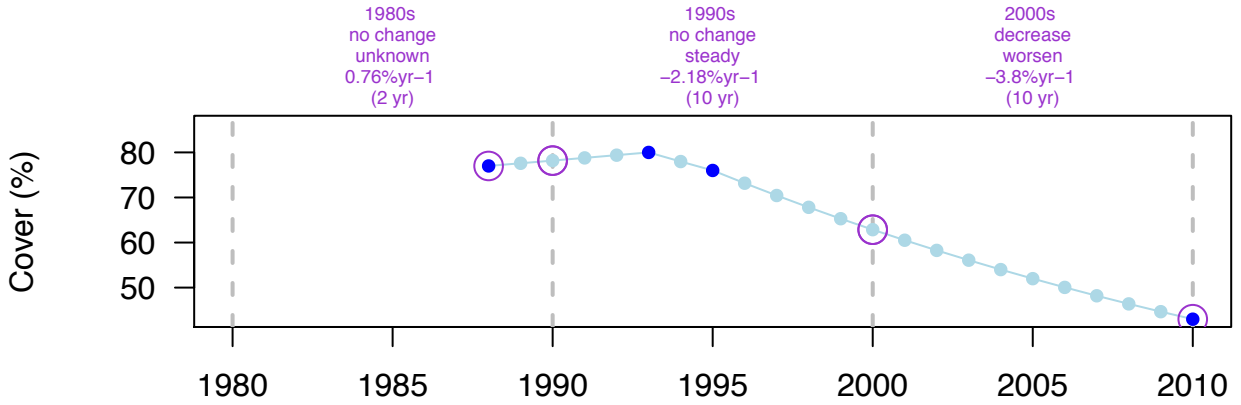

198\_density

González-Correa et al. 2015

SITE: Isla de Tabarca (Spain – Mediterranean) – Po (-4 m)

OVERALL: Net = -238 shoot m<sup>-2</sup>; Rate = -1.15 % yr<sup>-1</sup>; Perc Final = 78 % > no change

DECADAL: YES (22 yr)

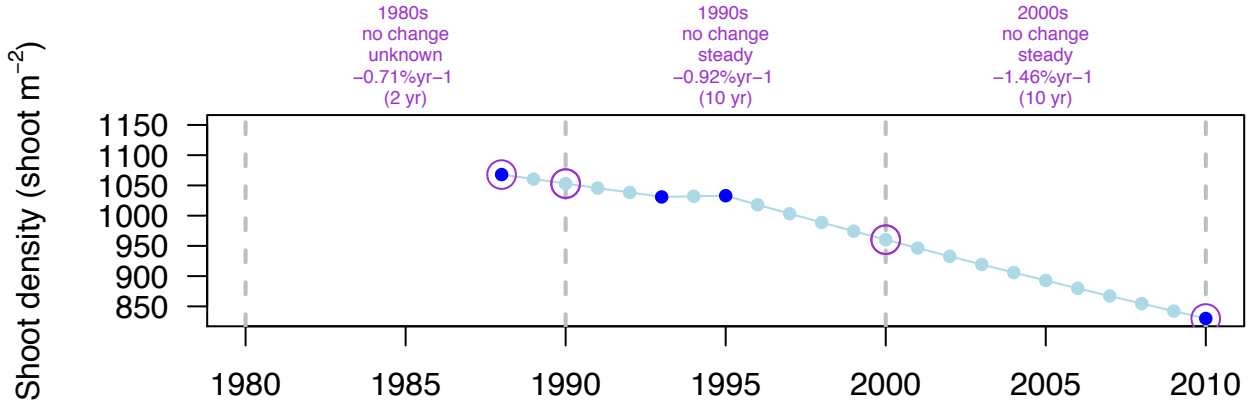

199\_cover

González-Correa et al. 2015

SITE: Isla de Tabarca (Spain – Mediterranean) – Po (-12 m)

OVERALL: Net = 13 %; Rate = 1.05 % yr<sup>-1</sup>; Perc Final = 126 % > increase

DECADAL: YES (22 yr)

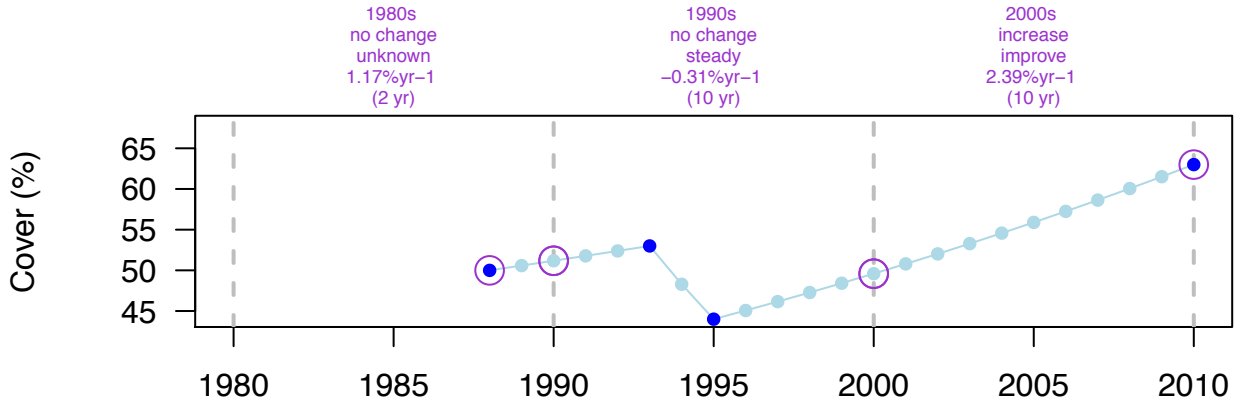

199\_density

González-Correa et al. 2015

SITE: Isla de Tabarca (Spain – Mediterranean) – Po (-12 m)

OVERALL: Net = 83 shoot m<sup>-2</sup>; Rate = 0.81 % yr<sup>-1</sup>; Perc Final = 119 % > no change

DECADAL: YES (22 yr)

Shoot density (shoot m<sup>-2</sup>)

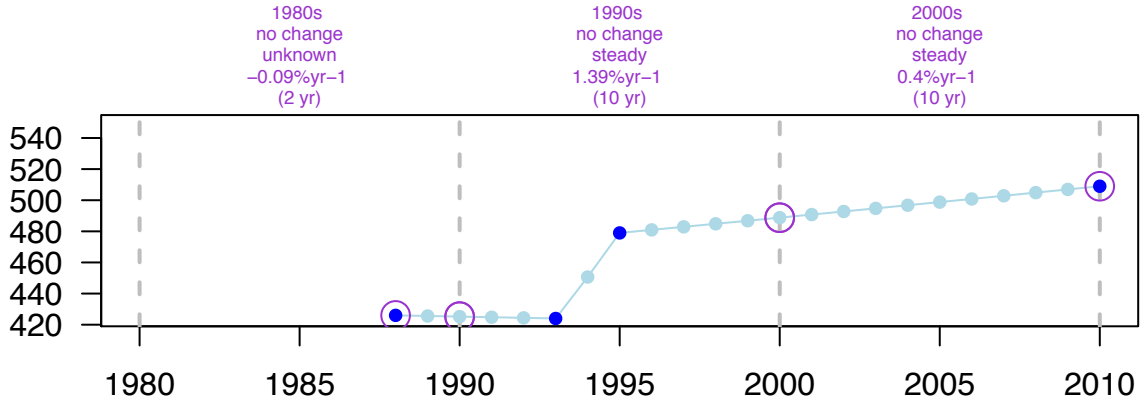

200\_cover

González-Correa et al. 2015

SITE: Isla de Tabarca (Spain – Mediterranean) – Po (-20 m)

OVERALL: Net = 20 %; Rate = 1.5 % yr<sup>-1</sup>; Perc Final = 139 % > increase

DECADAL: YES (22 yr)

Cover (%)

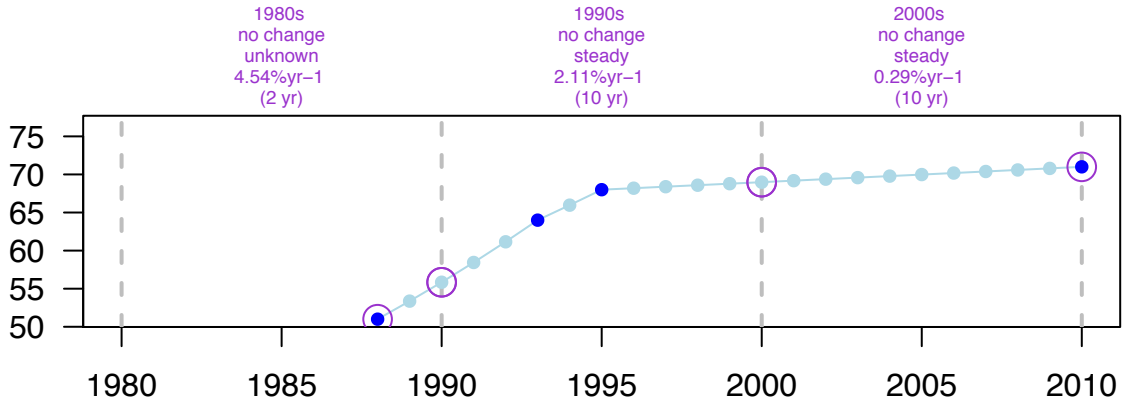

200\_density

González-Correa et al. 2015

SITE: Isla de Tabarca (Spain – Mediterranean) – Po (-20 m)

OVERALL: Net = -52 shoot m<sup>-2</sup>; Rate = -0.65 % yr<sup>-1</sup>; Perc Final = 87 % > no change

DECADAL: YES (22 yr)

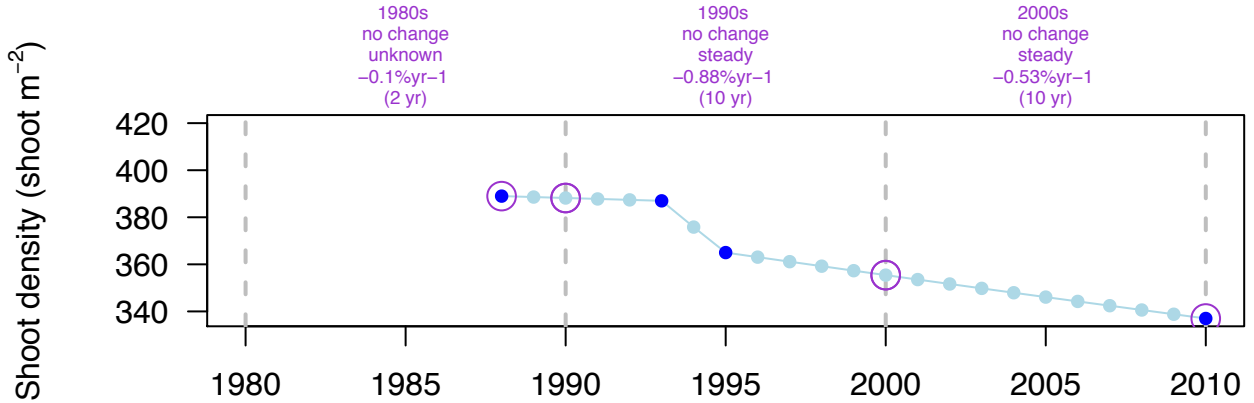

201\_cover

Guillén et al. 2013

SITE: Altea (Spain – Mediterranean) – Po (-15 m)

OVERALL: Net = 23.81 %; Rate = 3.81 % yr<sup>-1</sup>; Perc Final = 141 % > increase

DECADAL: YES (9 yr)

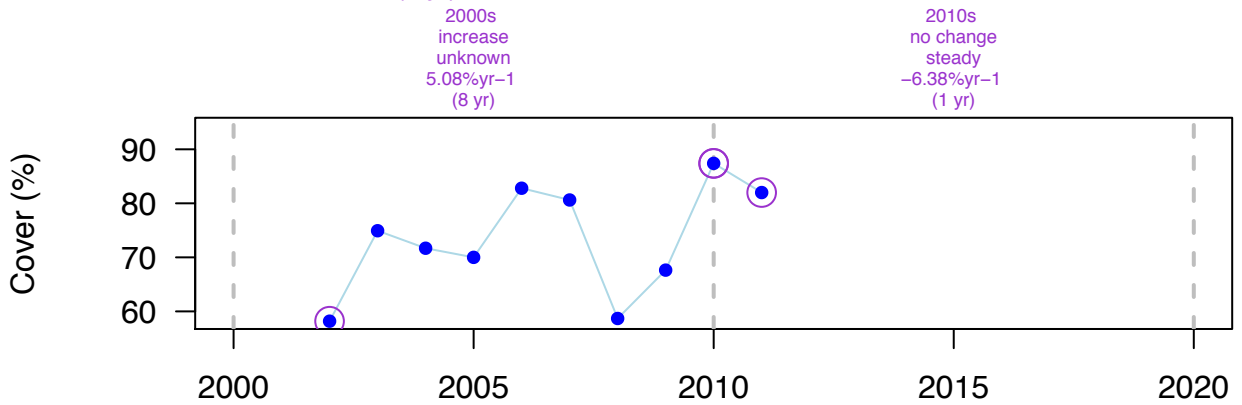

201\_density

Guillén et al. 2013

SITE: Altea (Spain – Mediterranean) – Po (-15 m)

OVERALL: Net = 22.71 shoot m<sup>-2</sup>; Rate = 1.6 % yr<sup>-1</sup>; Perc Final = 116 % > no change

DECADAL: YES (9 yr)

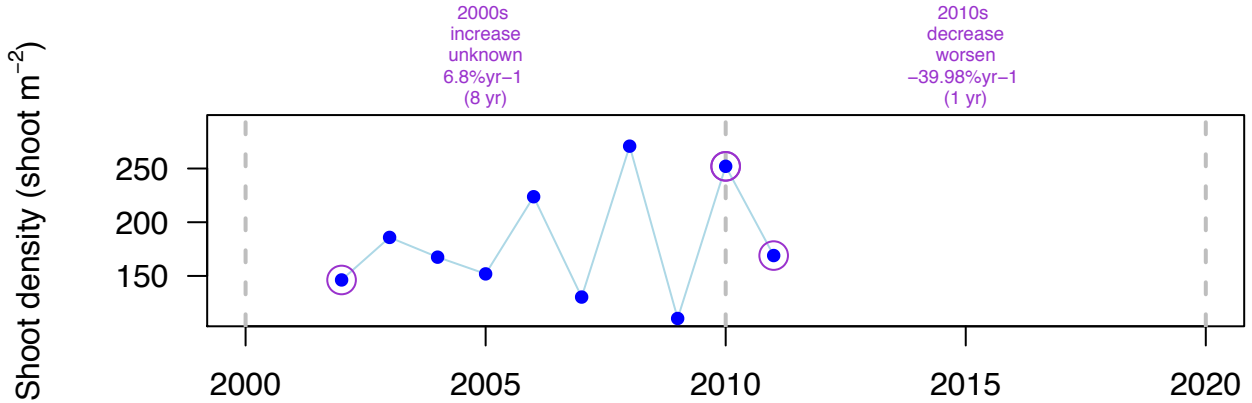

202\_cover

Guillén et al. 2013

SITE: Altea (Spain – Mediterranean) – Po (-7 m)

OVERALL: Net = 5.8 %; Rate = 0.81 % yr<sup>-1</sup>; Perc Final = 108 % > no change

DECADAL: YES (9 yr)

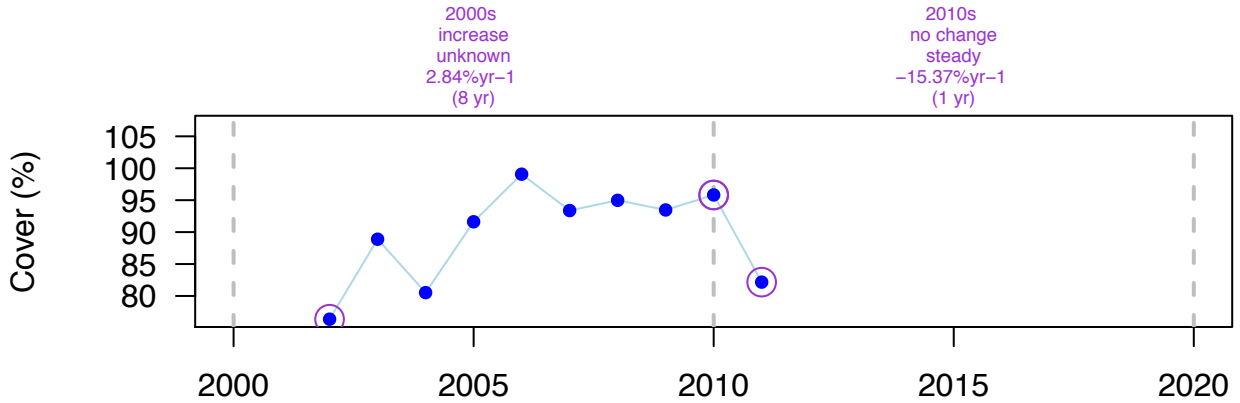

202\_density

Guillén et al. 2013

SITE: Altea (Spain – Mediterranean) – Po (-7 m)

OVERALL: Net = 125.58 shoot m<sup>-2</sup>; Rate = 4.61 % yr<sup>-1</sup>; Perc Final = 151 % > increase

DECADAL: YES (9 yr)

Shoot density (shoot m<sup>-2</sup>)

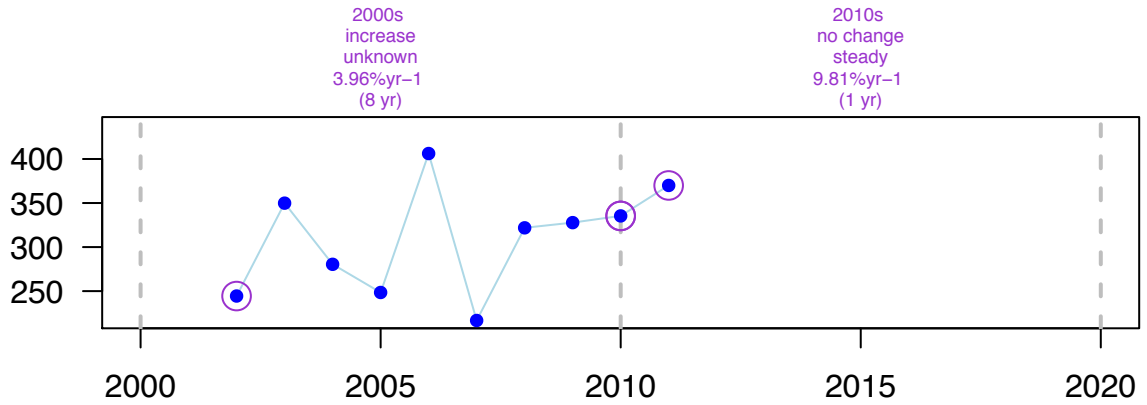

203\_cover

Guillén et al. 2013

SITE: Benidorm (Spain – Mediterranean) – Po (-11 m)

OVERALL: Net = 4.7 %; Rate = 0.73 % yr<sup>-1</sup>; Perc Final = 107 % > no change

DECADAL: YES (9 yr)

Cover (%)

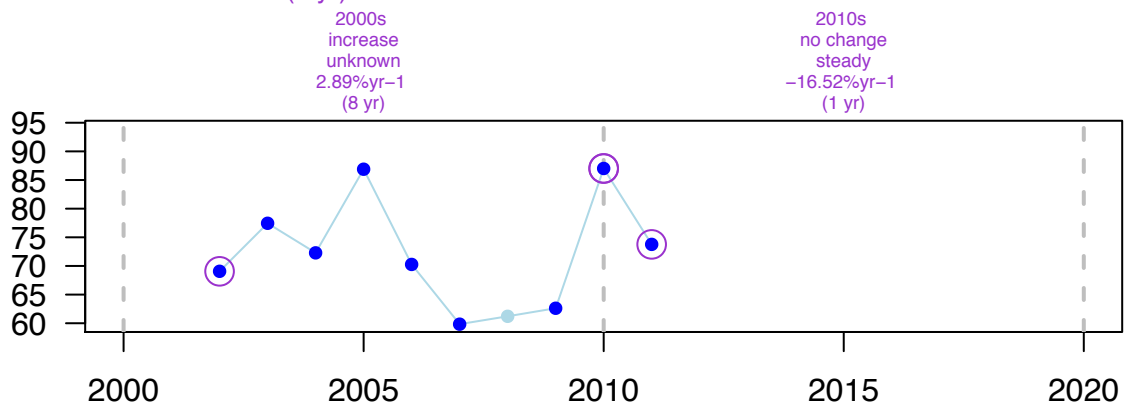

203\_density

Guillén et al. 2013

SITE: Benidorm (Spain – Mediterranean) – Po (-11 m)

OVERALL: Net = 269.83 shoot m<sup>-2</sup>; Rate = 9.3 % yr<sup>-1</sup>; Perc Final = 231 % > increase

DECADAL: YES (9 yr)

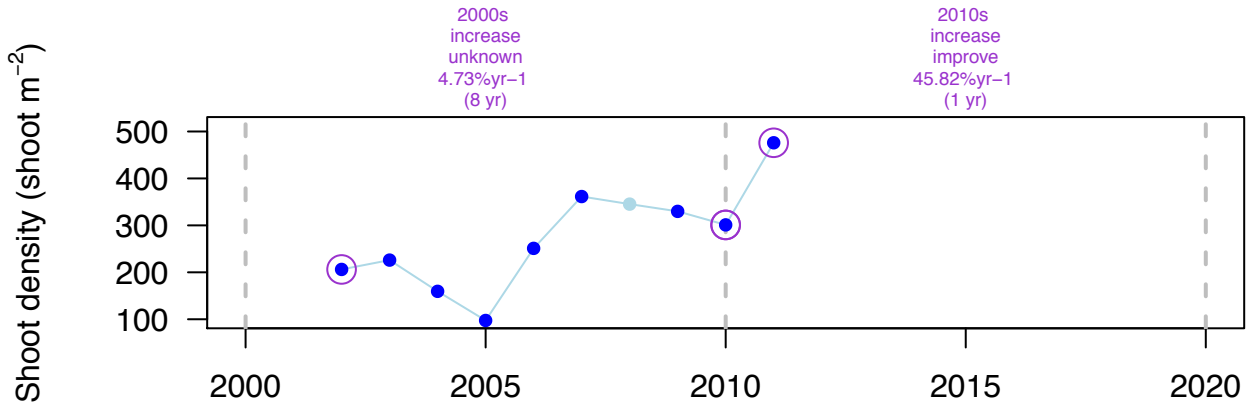

204\_cover

Guillén et al. 2013

SITE: Benidorm (Spain – Mediterranean) – Po (-5 m)

OVERALL: Net = 11.04 %; Rate = 1.63 % yr<sup>-1</sup>; Perc Final = 116 % > no change

DECADAL: YES (9 yr)

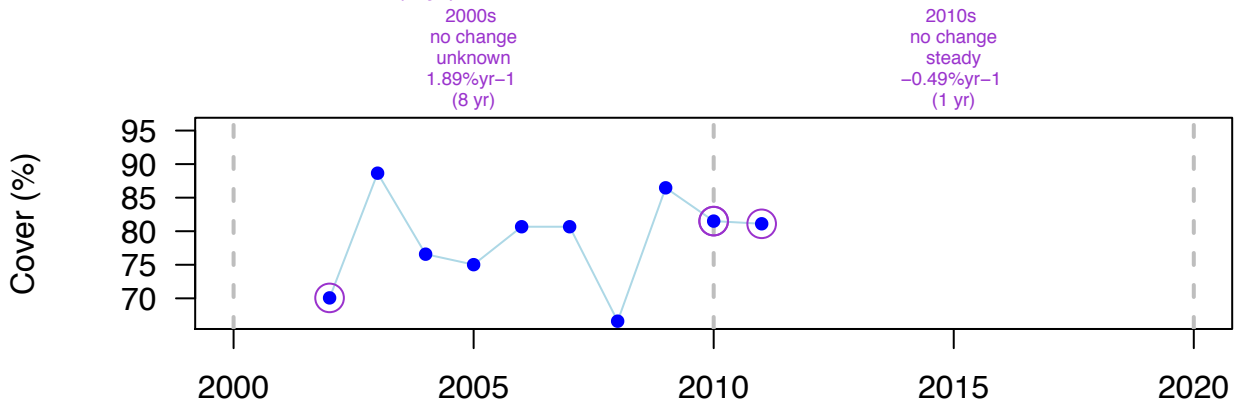

204\_density

Guillén et al. 2013

SITE: Benidorm (Spain – Mediterranean) – Po (-5 m)

OVERALL: Net = 330 shoot m<sup>-2</sup>; Rate = 9.89 % yr<sup>-1</sup>; Perc Final = 243 % > increase

DECADAL: YES (9 yr)

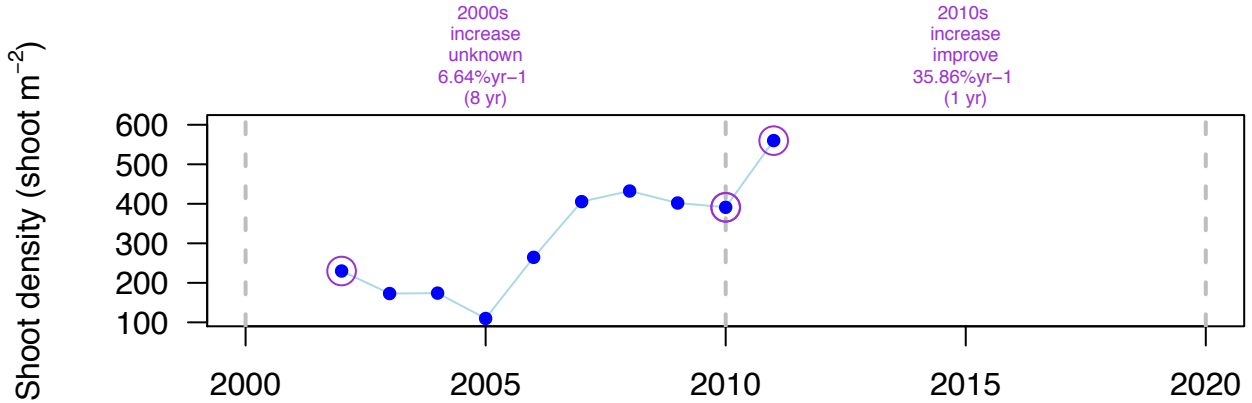

205\_cover

Guillén et al. 2013

SITE: Cabo Huertas (Spain – Mediterranean) – Po (-13 m)

OVERALL: Net = -11.64 %; Rate = -1.96 % yr<sup>-1</sup>; Perc Final = 85 % > no change

DECADAL: YES (8 yr)

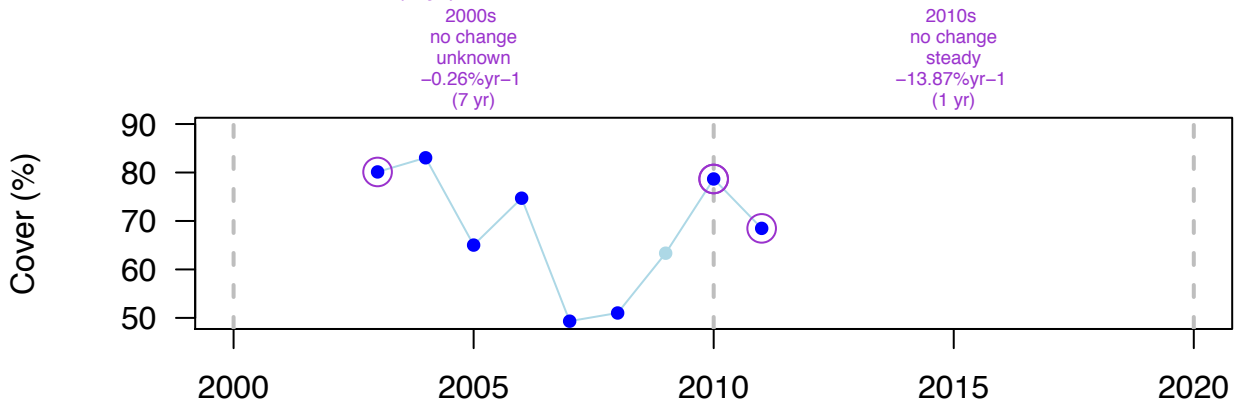



205\_density

Guillén et al. 2013

SITE: Cabo Huertas (Spain – Mediterranean) – Po (-13 m)

OVERALL: Net = 78.93 shoot m<sup>-2</sup>; Rate = 4.07 % yr<sup>-1</sup>; Perc Final = 138 % > increase

DECADAL: YES (8 yr)

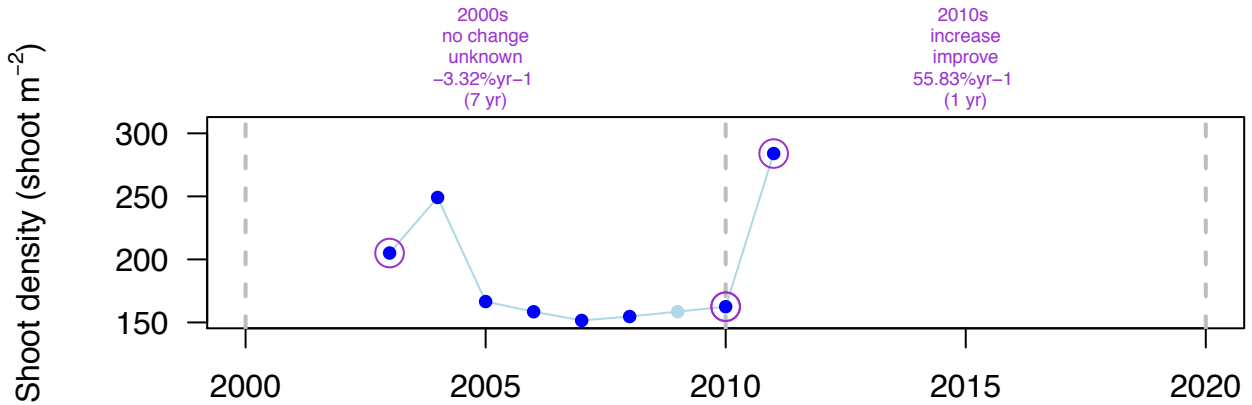

206\_cover

Guillén et al. 2013

SITE: Cabo Huertas (Spain – Mediterranean) – Po (-6 m)

OVERALL: Net = -3.64 %; Rate = -0.65 % yr<sup>-1</sup>; Perc Final = 95 % > no change

DECADAL: YES (8 yr)

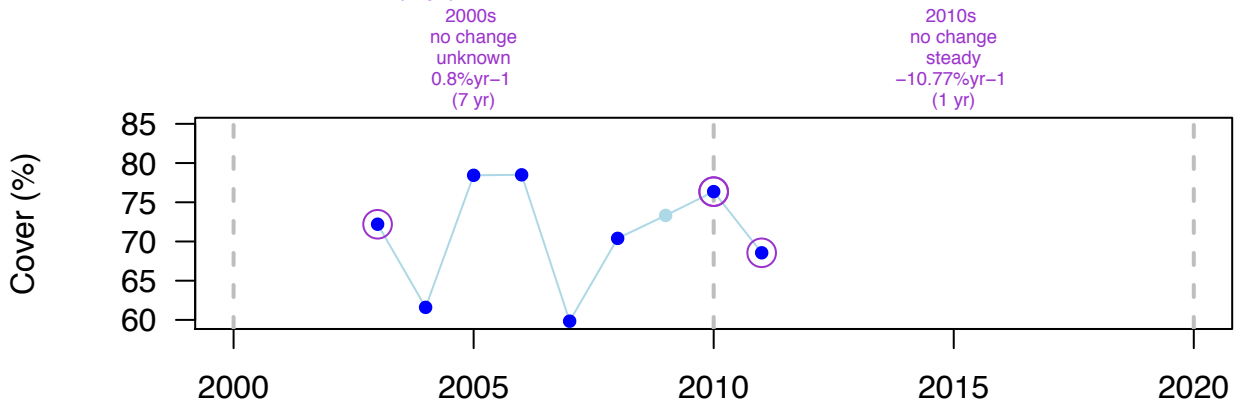

206\_density

Guillén et al. 2013

SITE: Cabo Huertas (Spain – Mediterranean) – Po (-6 m)

OVERALL: Net = 316.43 shoot m<sup>-2</sup>; Rate = 11.95 % yr<sup>-1</sup>; Perc Final = 260 % > increase

DECADAL: YES (8 yr)

Shoot density (shoot m<sup>-2</sup>)

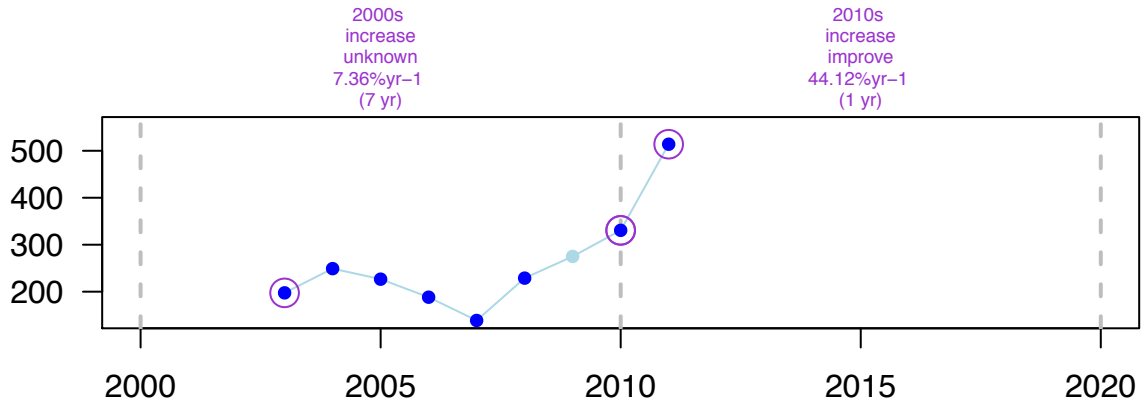

207\_cover

Guillén et al. 2013

SITE: Cala Mina (Spain – Mediterranean) – Po (-10 m)

OVERALL: Net = 24.98 %; Rate = 4.87 % yr<sup>-1</sup>; Perc Final = 141 % > increase

DECADAL: NO (7 yr)

Cover (%)

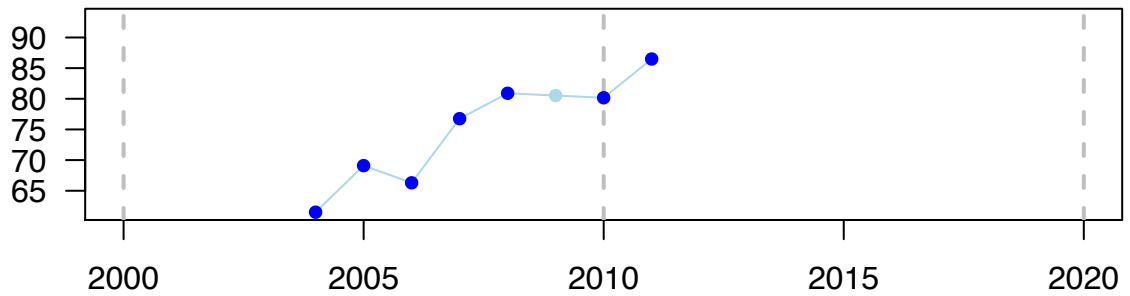

207\_density

Guillén et al. 2013

SITE: Cala Mina (Spain – Mediterranean) – Po (-10 m)

OVERALL: Net = 47.29 shoot m<sup>-2</sup>; Rate = 2.98 % yr<sup>-1</sup>; Perc Final = 123 % > no change

DECADAL: NO (7 yr)

Shoot density (shoot m<sup>-2</sup>)

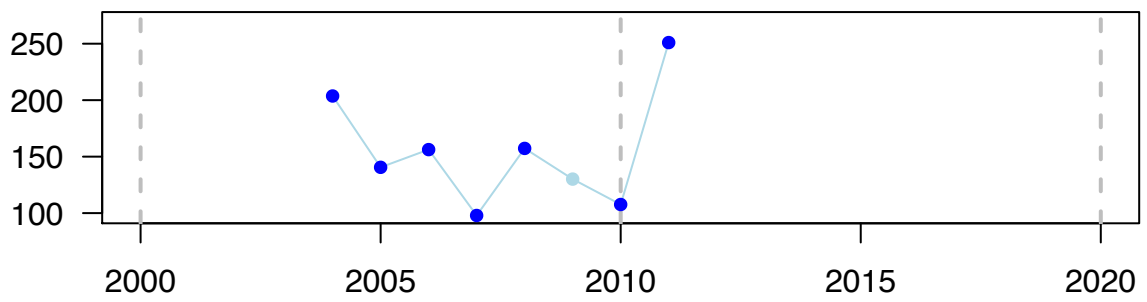

208\_cover

Guillén et al. 2013

SITE: Cala Mina (Spain – Mediterranean) – Po (-5 m)

OVERALL: Net = -1.67 %; Rate = -0.35 % yr<sup>-1</sup>; Perc Final = 98 % > no change

DECADAL: NO (7 yr)

Cover (%)

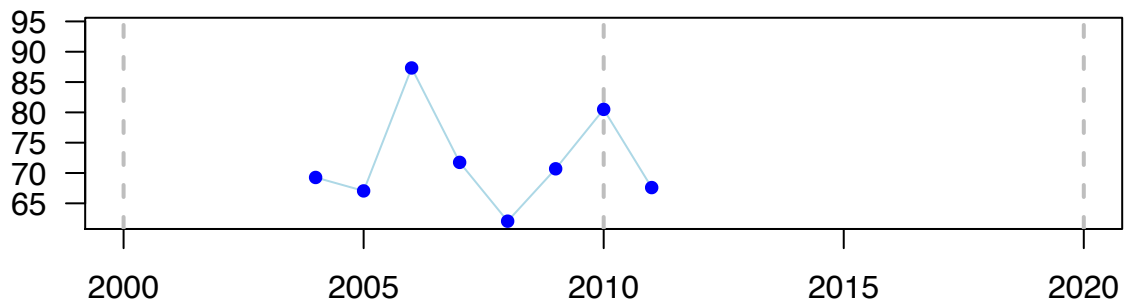

208\_density

Guillén et al. 2013

SITE: Cala Mina (Spain – Mediterranean) – Po (-5 m)

OVERALL: Net = 20 shoot m<sup>-2</sup>; Rate = 1.22 % yr<sup>-1</sup>; Perc Final = 109 % > no change

DECADAL: NO (7 yr)

Shoot density (shoot m<sup>-2</sup>)

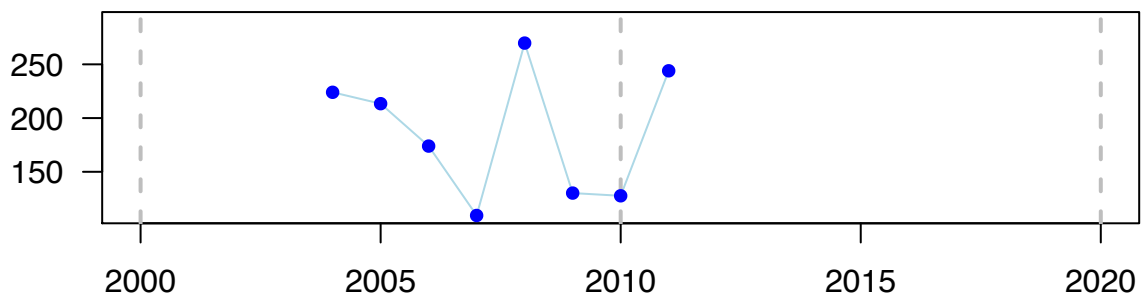

209\_cover

Guillén et al. 2013

SITE: Calpe (Spain – Mediterranean) – Po (-12 m)

OVERALL: Net = 17.65 %; Rate = 2.42 % yr<sup>-1</sup>; Perc Final = 124 % > no change

DECADAL: YES (9 yr)

Cover (%)

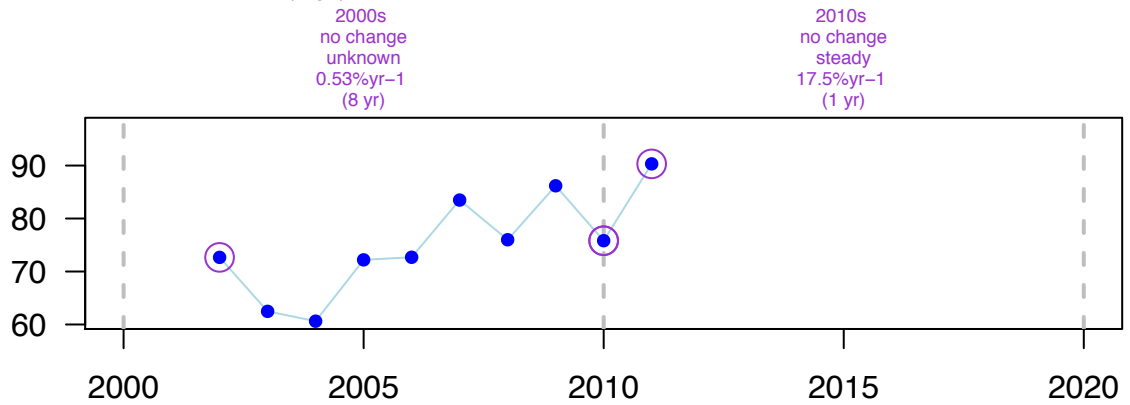

209\_density

Guillén et al. 2013

SITE: Calpe (Spain – Mediterranean) – Po (-12 m)

OVERALL: Net = 75.5 shoot m<sup>-2</sup>; Rate = 3.64 % yr<sup>-1</sup>; Perc Final = 139 % > increase

DECADAL: YES (9 yr)

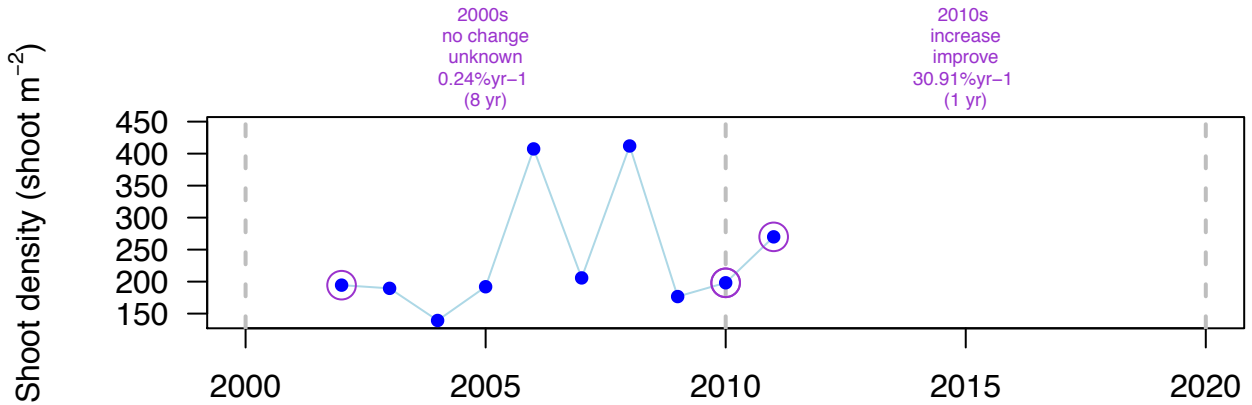

210\_cover

Guillén et al. 2013

SITE: Calpe (Spain – Mediterranean) – Po (-6 m)

OVERALL: Net = 18.71 %; Rate = 3.23 % yr<sup>-1</sup>; Perc Final = 134 % > increase

DECADAL: YES (9 yr)

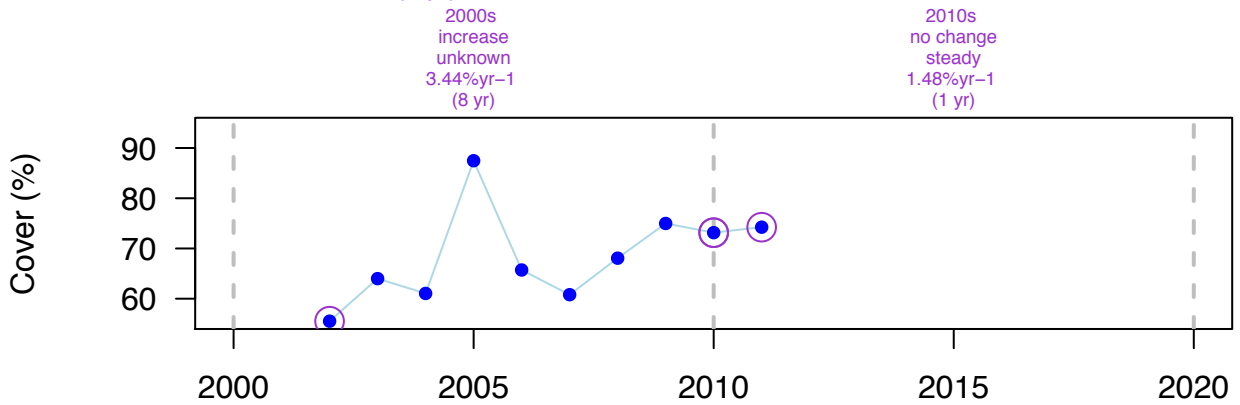

210\_density

Guillén et al. 2013

SITE: Calpe (Spain – Mediterranean) – Po (-6 m)

OVERALL: Net = 205.4 shoot m<sup>-2</sup>; Rate = 4.62 % yr<sup>-1</sup>; Perc Final = 152 % > increase

DECADAL: YES (9 yr)

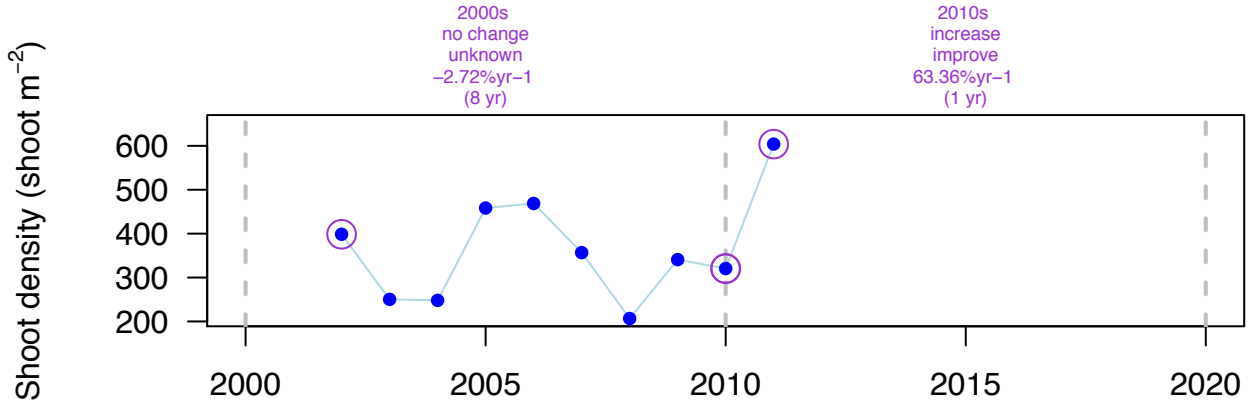

211\_cover

Guillén et al. 2013

SITE: El Campello (Spain – Mediterranean) – Po (-13 m)

OVERALL: Net = -9.79 %; Rate = -1.21 % yr<sup>-1</sup>; Perc Final = 90 % > no change

DECADAL: YES (9 yr)

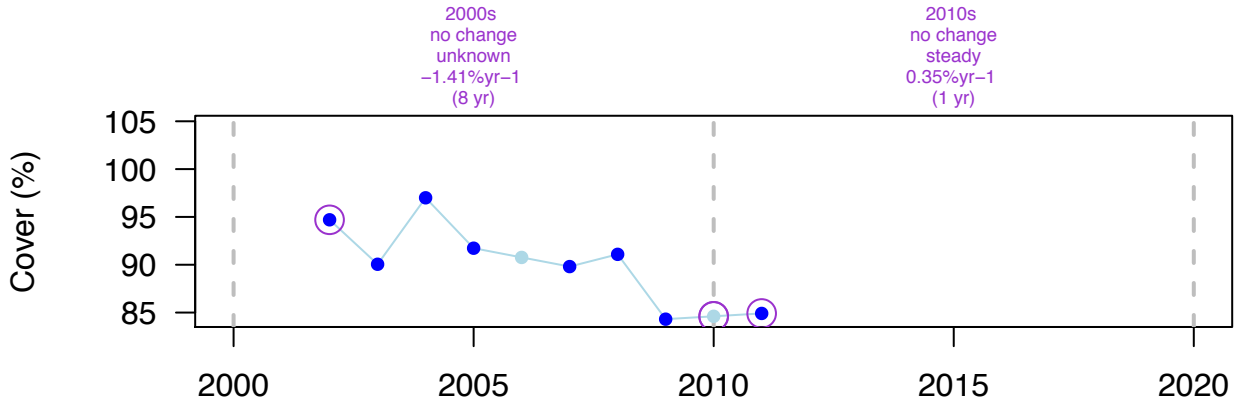

211\_density

Guillén et al. 2013

SITE: El Campello (Spain – Mediterranean) – Po (-13 m)

OVERALL: Net = 98.9 shoot m<sup>-2</sup>; Rate = 4.27 % yr<sup>-1</sup>; Perc Final = 147 % > increase

DECADAL: YES (9 yr)

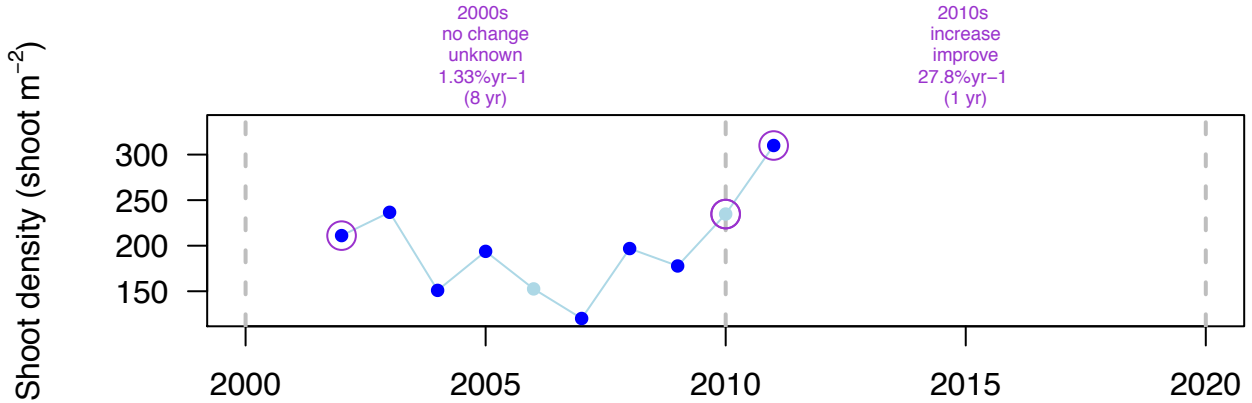

212\_cover

Guillén et al. 2013

SITE: El Campello (Spain – Mediterranean) – Po (-7 m)

OVERALL: Net = 7.35 %; Rate = 1.19 % yr<sup>-1</sup>; Perc Final = 111 % > no change

DECADAL: YES (9 yr)

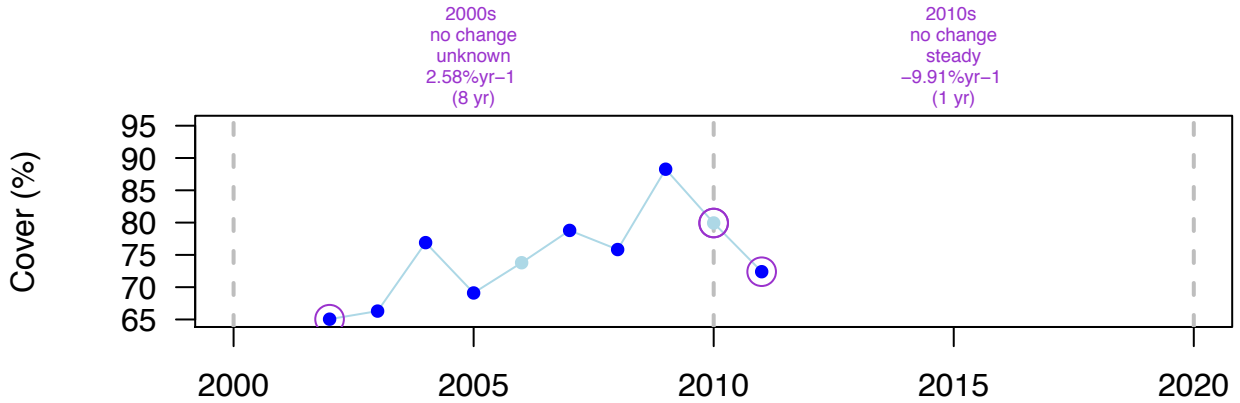

212\_density

Guillén et al. 2013

SITE: El Campello (Spain – Mediterranean) – Po (-7 m)

OVERALL: Net = 134 shoot m<sup>-2</sup>; Rate = 4.9 % yr<sup>-1</sup>; Perc Final = 155 % > increase

DECADAL: YES (9 yr)

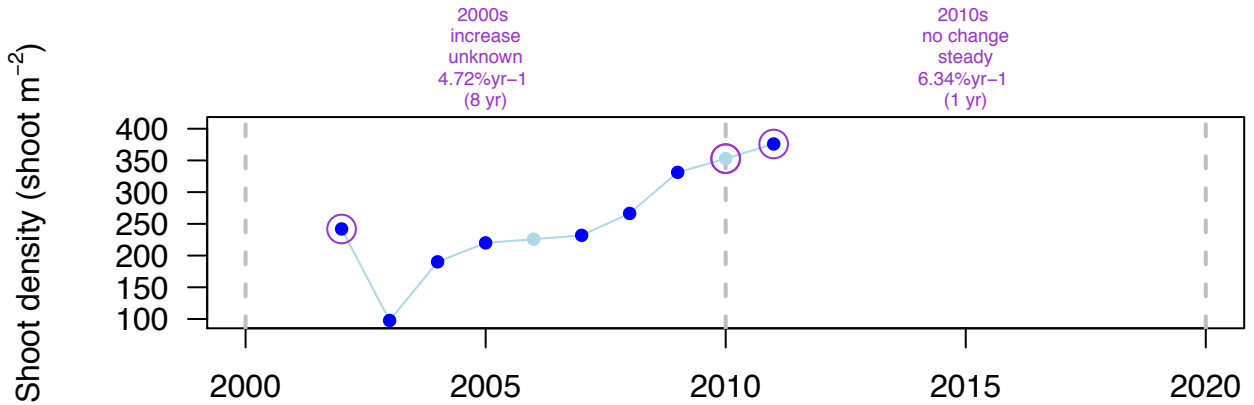

213\_cover

Guillén et al. 2013

SITE: Carabassí (Spain – Mediterranean) – Po (-12 m)

OVERALL: Net = 32.33 %; Rate = 4.65 % yr<sup>-1</sup>; Perc Final = 152 % > increase

DECADAL: YES (9 yr)

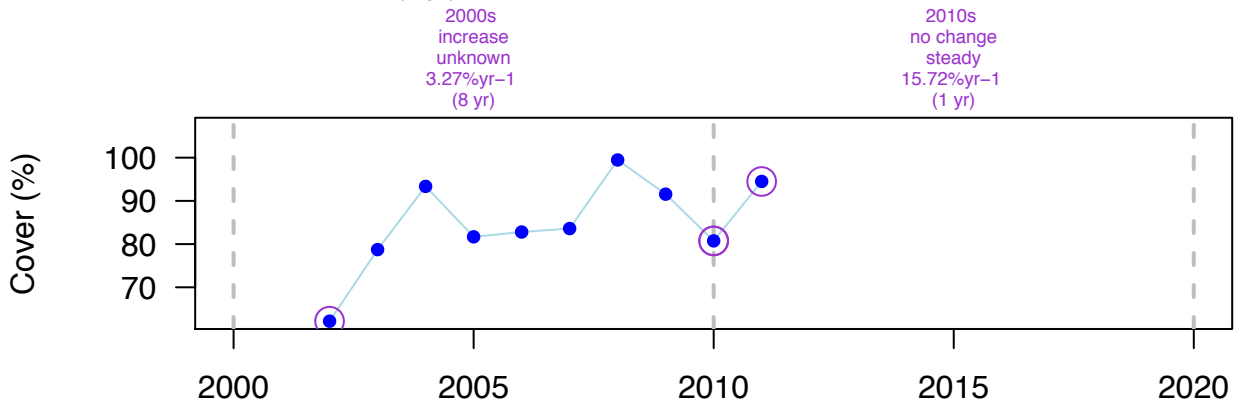



213\_density

Guillén et al. 2013

SITE: Carabassí (Spain – Mediterranean) – Po (-12 m)

OVERALL: Net = 106.42 shoot m<sup>-2</sup>; Rate = 6.62 % yr<sup>-1</sup>; Perc Final = 181 % > increase

DECADAL: YES (9 yr)

Shoot density (shoot m<sup>-2</sup>)

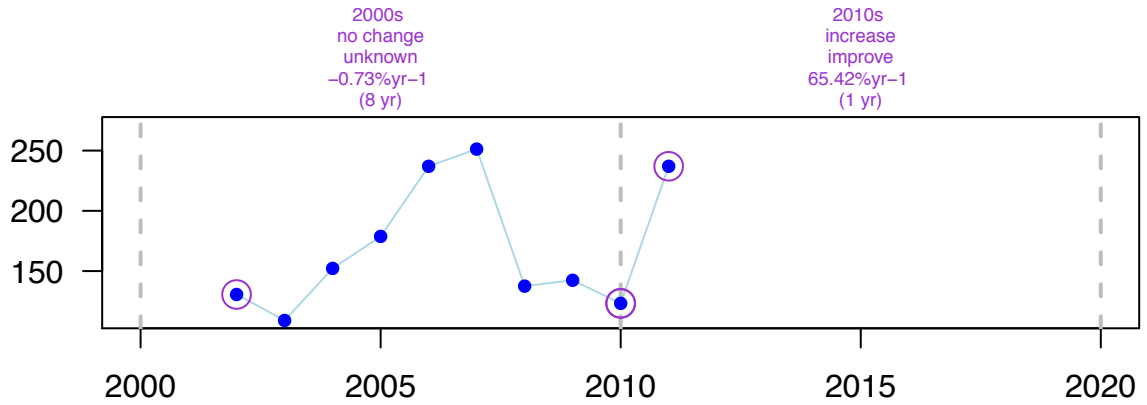

214\_cover

Guillén et al. 2013

SITE: Carabassí (Spain – Mediterranean) – Po (-6 m)

OVERALL: Net = 0.44 %; Rate = 0.07 % yr<sup>-1</sup>; Perc Final = 101 % > no change

DECADAL: YES (9 yr)

Cover (%)

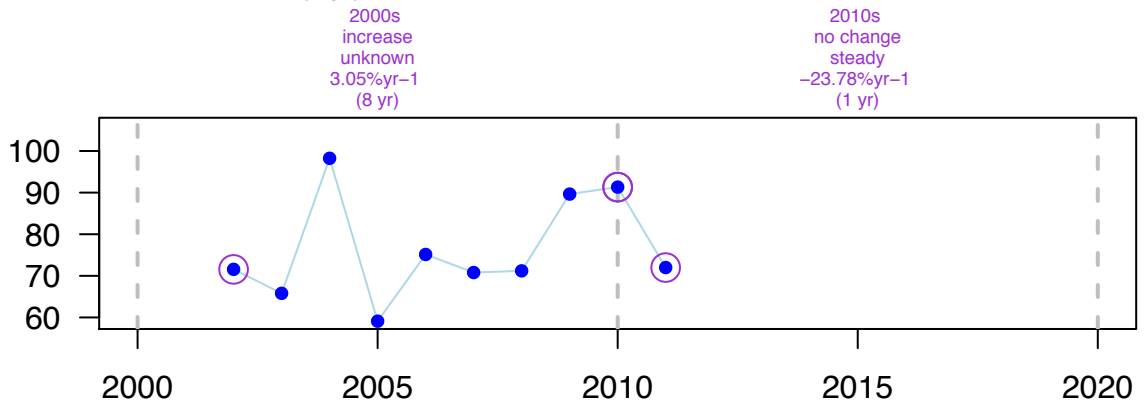

214\_density

Guillén et al. 2013

SITE: Carabassí (Spain – Mediterranean) – Po (-6 m)

OVERALL: Net = 86 shoot m<sup>-2</sup>; Rate = 4.11 % yr<sup>-1</sup>; Perc Final = 145 % > increase

DECADAL: YES (9 yr)

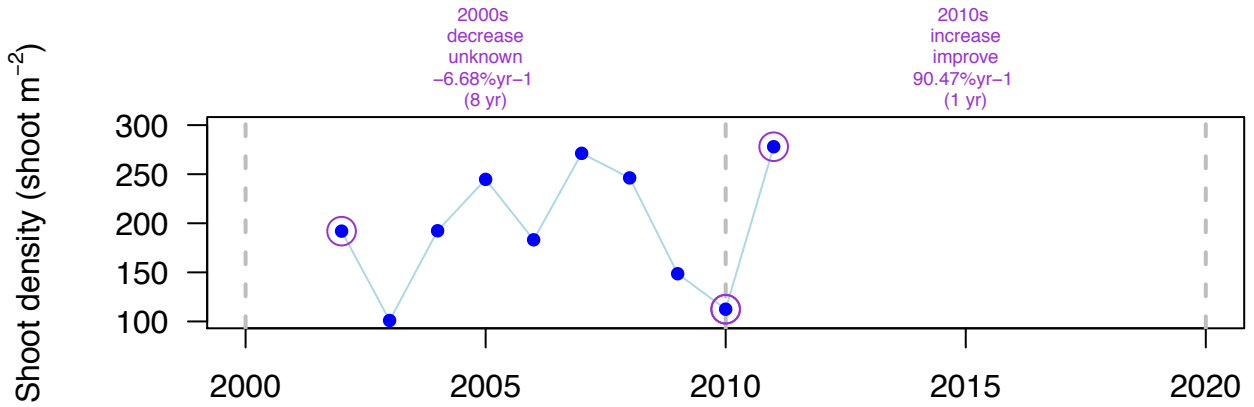

215\_cover

Guillén et al. 2013

SITE: Denia (Spain – Mediterranean) – Po (-13 m)

OVERALL: Net = 15.9 %; Rate = 5.07 % yr<sup>-1</sup>; Perc Final = 143 % > increase

DECADAL: NO (7 yr)

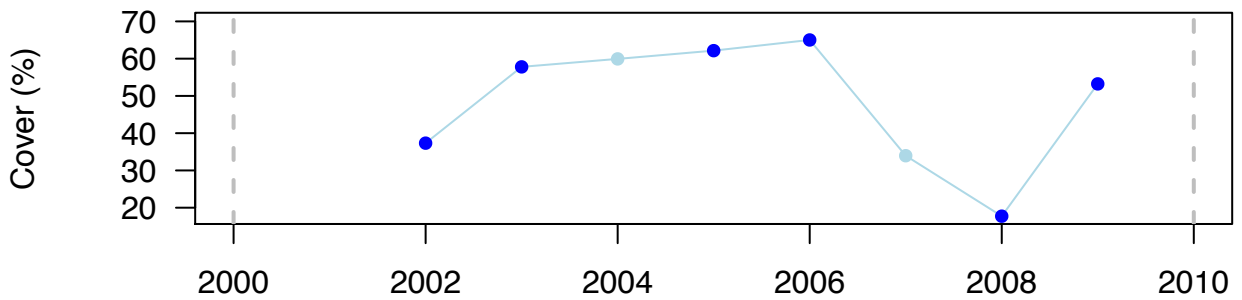

215\_density

Guillén et al. 2013

SITE: Denia (Spain – Mediterranean) – Po (-13 m)

OVERALL: Net = 33.46 shoot m<sup>-2</sup>; Rate = 1.84 % yr<sup>-1</sup>; Perc Final = 114 % > no change

DECADAL: NO (7 yr)

Shoot density (shoot m<sup>-2</sup>)

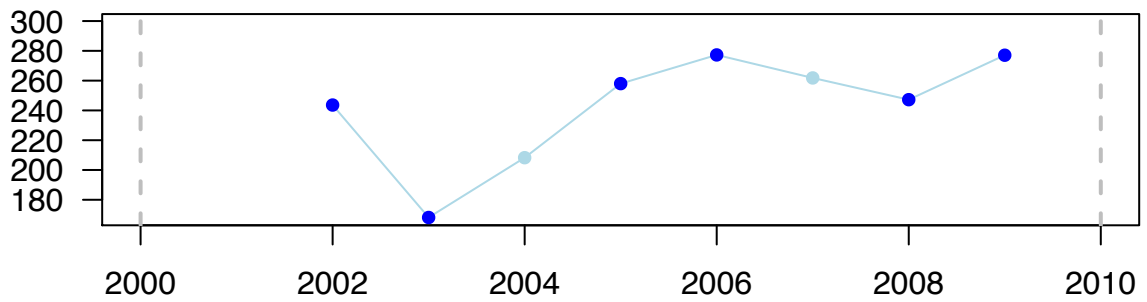

216\_cover

Guillén et al. 2013

SITE: Denia (Spain – Mediterranean) – Po (-5 m)

OVERALL: Net = 10.19 %; Rate = 2.27 % yr<sup>-1</sup>; Perc Final = 117 % > no change

DECADAL: NO (7 yr)

Cover (%)

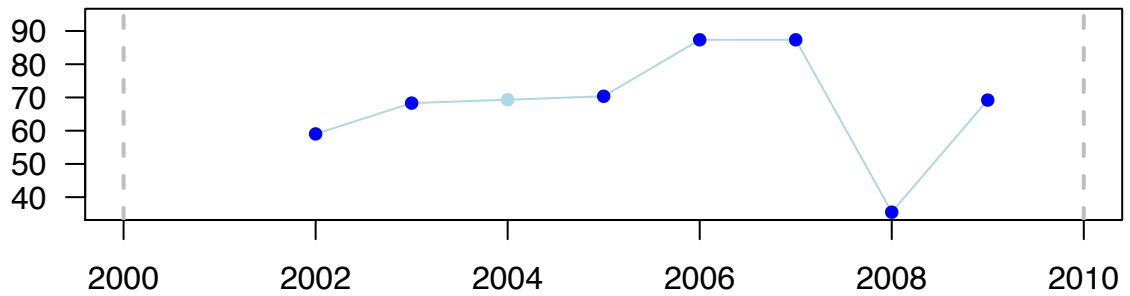

216\_density

Guillén et al. 2013

SITE: Denia (Spain – Mediterranean) – Po (-5 m)

OVERALL: Net = 78.84 shoot m<sup>-2</sup>; Rate = 4.01 % yr<sup>-1</sup>; Perc Final = 132 % > increase

DECADAL: NO (7 yr)

Shoot density (shoot m<sup>-2</sup>)

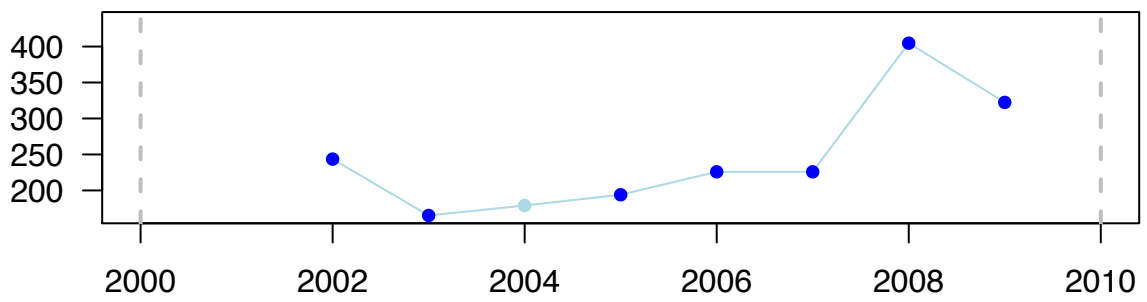

217\_cover

Guillén et al. 2013

SITE: Moraira (Spain – Mediterranean) – Po (-14 m)

OVERALL: Net = 9.76 %; Rate = 1.9 % yr<sup>-1</sup>; Perc Final = 112 % > no change

DECADAL: NO (6 yr)

Cover (%)

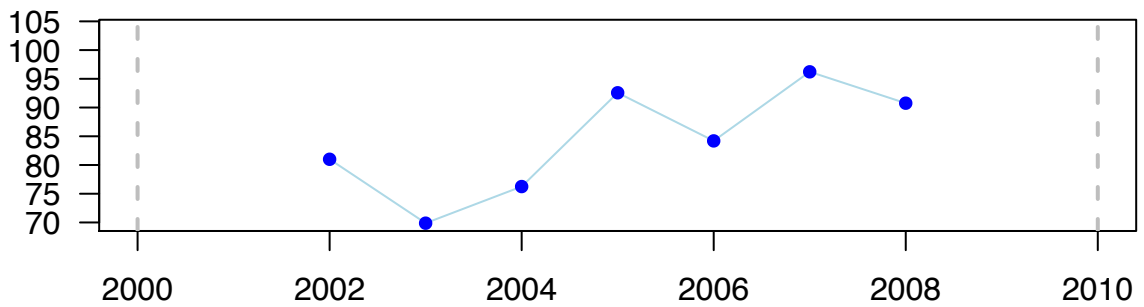

217\_density

Guillén et al. 2013

SITE: Moraira (Spain – Mediterranean) – Po (-14 m)

OVERALL: Net = 4.3 shoot m<sup>-2</sup>; Rate = 0.72 % yr<sup>-1</sup>; Perc Final = 104 % > no change

DECADAL: NO (6 yr)

Shoot density (shoot m<sup>-2</sup>)

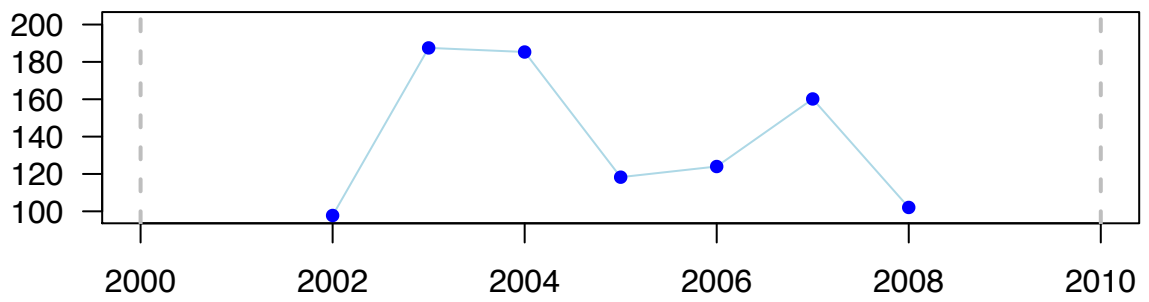

218\_cover

Guillén et al. 2013

SITE: Moraira (Spain – Mediterranean) – Po (-7 m)

OVERALL: Net = 15.07 %; Rate = 2.64 % yr<sup>-1</sup>; Perc Final = 120 % > no change

DECADAL: NO (7 yr)

Cover (%)

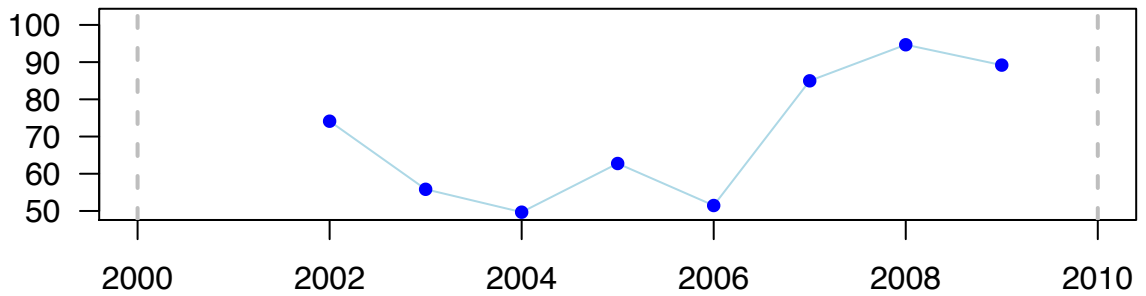

218\_density

Guillén et al. 2013

SITE: Moraira (Spain – Mediterranean) – Po (-7 m)

OVERALL: Net = 33.1 shoot m<sup>-2</sup>; Rate = 1.84 % yr<sup>-1</sup>; Perc Final = 114 % > no change

DECADAL: NO (7 yr)

Shoot density (shoot m<sup>-2</sup>)

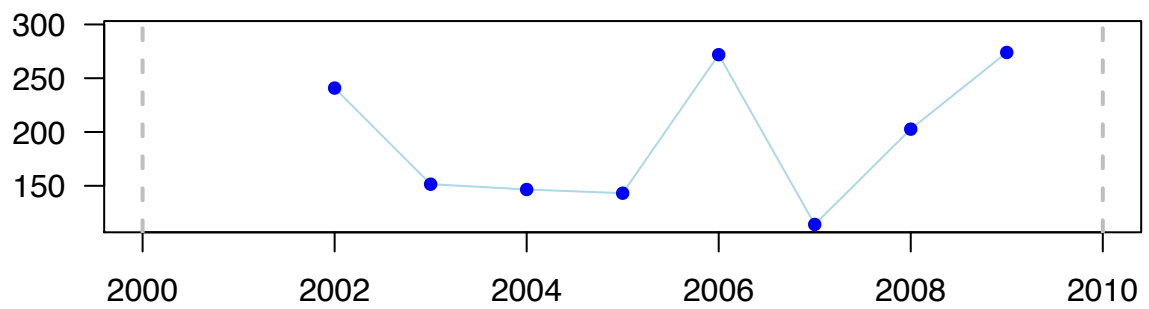

219\_cover

Guillén et al. 2013

SITE: Racó Conill (Spain – Mediterranean) – Po (-10 m)

OVERALL: Net = 6.27 %; Rate = 1.62 % yr<sup>-1</sup>; Perc Final = 112 % > no change

DECADAL: NO (7 yr)

Cover (%)

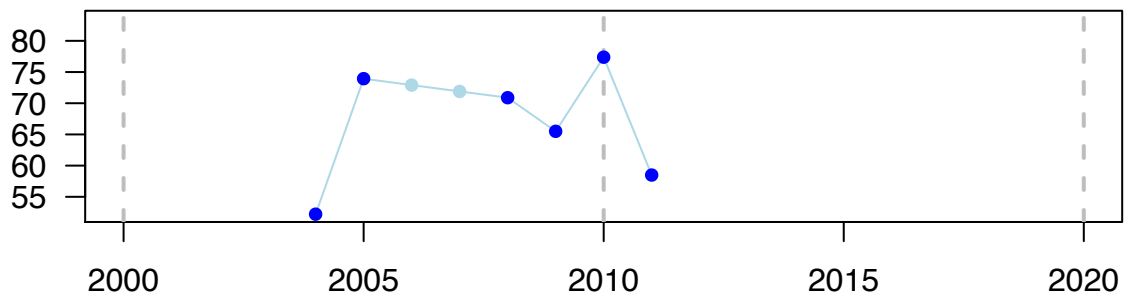

219\_density

Guillén et al. 2013

SITE: Racó Conill (Spain – Mediterranean) – Po (-10 m)

OVERALL: Net = -10.78 shoot m<sup>-2</sup>; Rate = -0.51 % yr<sup>-1</sup>; Perc Final = 96 % > no change

DECADAL: NO (7 yr)

Shoot density (shoot m<sup>-2</sup>)

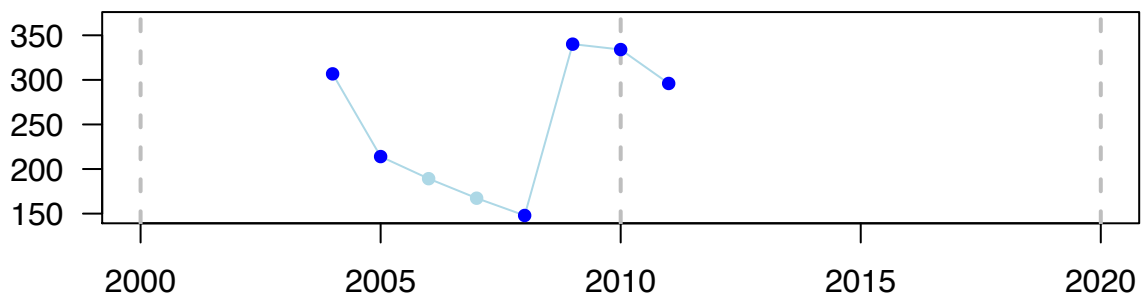

220\_cover

Guillén et al. 2013

SITE: Racó Conill (Spain – Mediterranean) – Po (-5 m)

OVERALL: Net = 3.62 %; Rate = 0.69 % yr<sup>-1</sup>; Perc Final = 105 % > no change

DECADAL: NO (7 yr)

Cover (%)

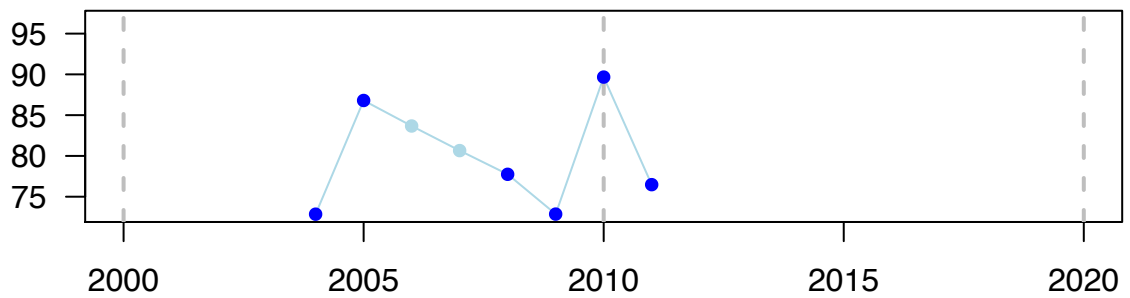

220\_density

Guillén et al. 2013

SITE: Racó Conill (Spain – Mediterranean) – Po (-5 m)

OVERALL: Net = 101 shoot m<sup>-2</sup>; Rate = 4.58 % yr<sup>-1</sup>; Perc Final = 138 % > increase

DECADAL: NO (7 yr)

Shoot density (shoot m<sup>-2</sup>)

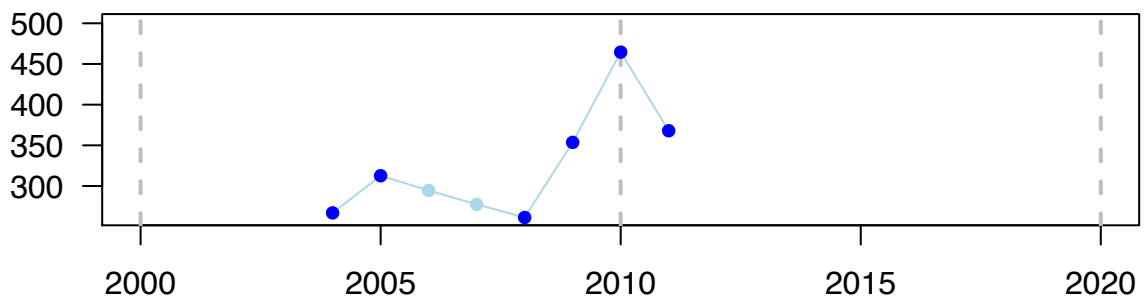

221\_cover

Guillén et al. 2013

SITE: Tabarca Escull Negre (Spain – Mediterranean) – Po (-12 m)

OVERALL: Net = -7 %; Rate = -0.97 % yr<sup>-1</sup>; Perc Final = 92 % > no change

DECADAL: YES (9 yr)

Cover (%)

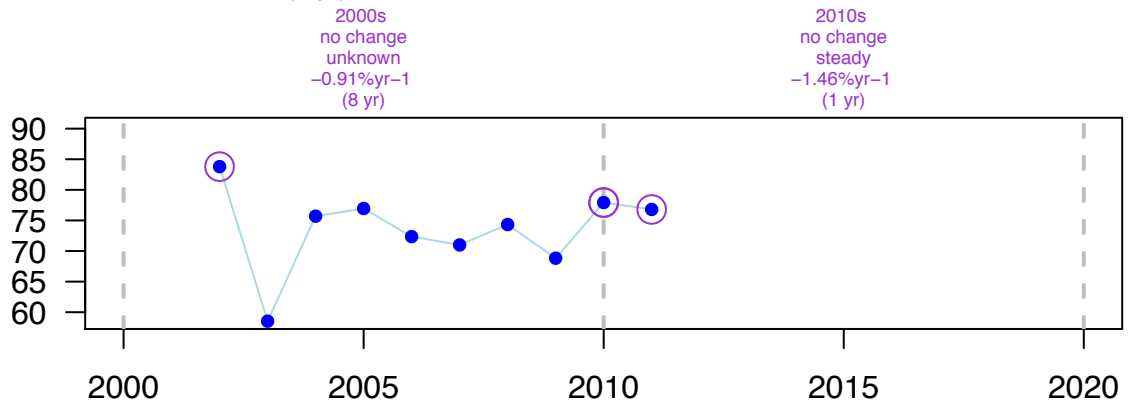



221\_density

Guillén et al. 2013

SITE: Tabarca Escull Negre (Spain – Mediterranean) – Po (-12 m)

OVERALL: Net = 168 shoot m<sup>-2</sup>; Rate = 5.84 % yr<sup>-1</sup>; Perc Final = 169 % > increase

DECADAL: YES (9 yr)

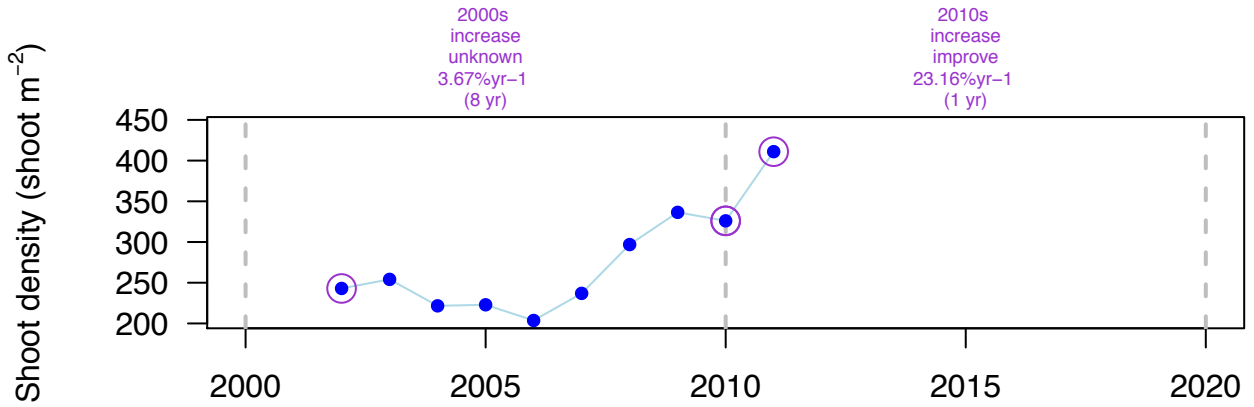

222\_area

Plus et al. 2010

SITE: Arguin Bank (France – Atlantic) – Zn (0 m)

OVERALL: Net = 0 ha; Rate = 0 % yr<sup>-1</sup>; Perc Final = 100 % > no change

DECADAL: NO (2 yr)

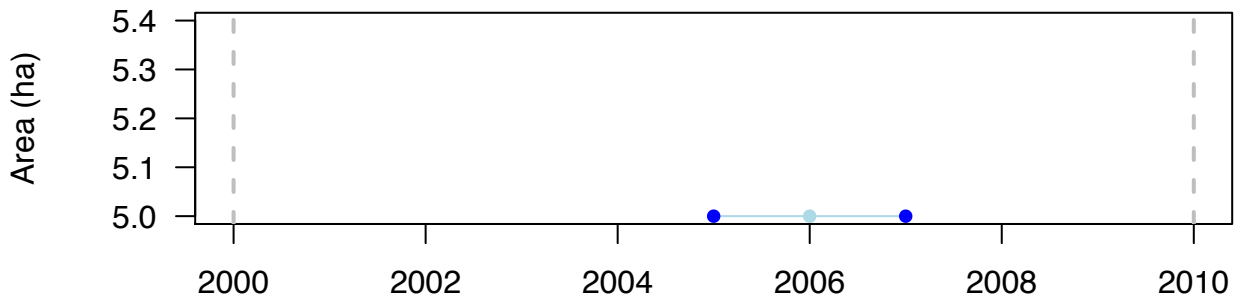

223\_cover

Guillén et al. 2013

SITE: Tabarca Escull Negre (Spain – Mediterranean) – Po (-6 m)

OVERALL: Net = 6.4 %; Rate = 0.95 % yr<sup>-1</sup>; Perc Final = 109 % > no change

DECADAL: YES (9 yr)

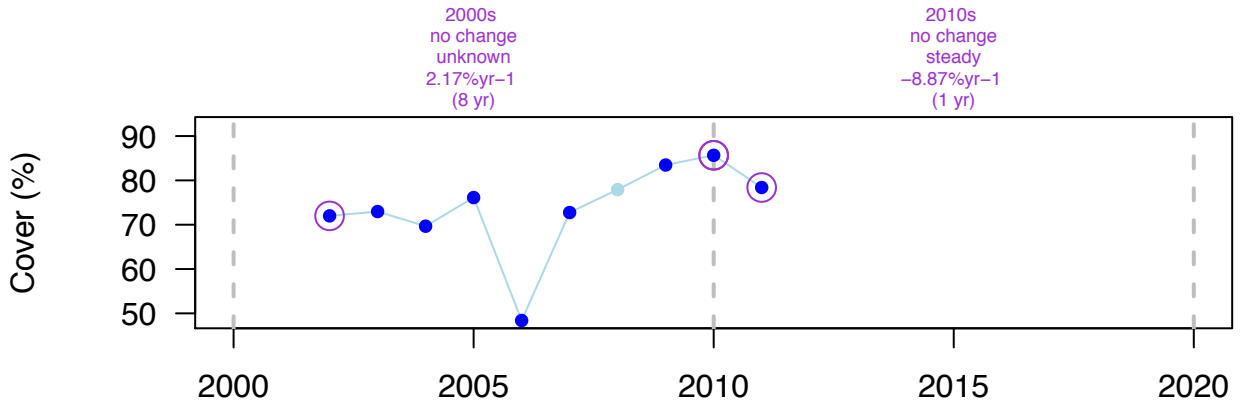

223\_density

Guillén et al. 2013

SITE: Tabarca Escull Negre (Spain – Mediterranean) – Po (-6 m)

OVERALL: Net = 112.67 shoot m<sup>-2</sup>; Rate = 4.39 % yr<sup>-1</sup>; Perc Final = 148 % > increase

DECADAL: YES (9 yr)

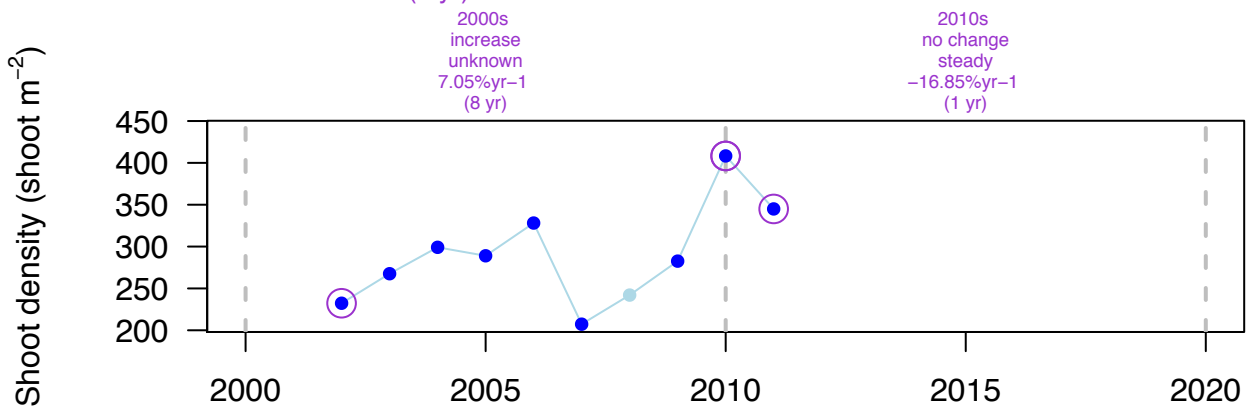

224\_cover

Guillén et al. 2013

SITE: Tabarca La Nao (Spain – Mediterranean) – Po (-12 m)

OVERALL: Net = -21.83 %; Rate = -2.74 % yr<sup>-1</sup>; Perc Final = 78 % > no change

DECADAL: YES (9 yr)

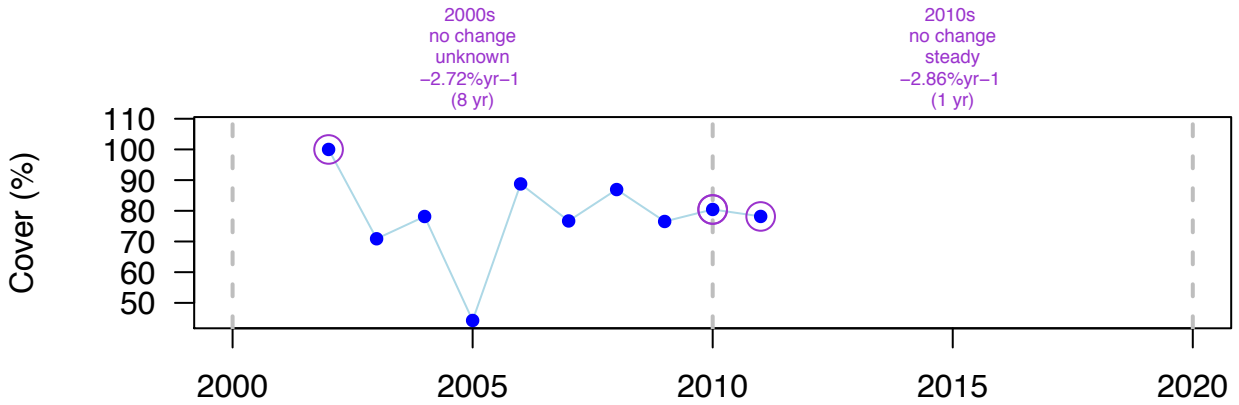

224\_density

Guillén et al. 2013

SITE: Tabarca La Nao (Spain – Mediterranean) – Po (-12 m)

OVERALL: Net = 50.12 shoot m<sup>-2</sup>; Rate = 2.06 % yr<sup>-1</sup>; Perc Final = 120 % > no change

DECADAL: YES (9 yr)

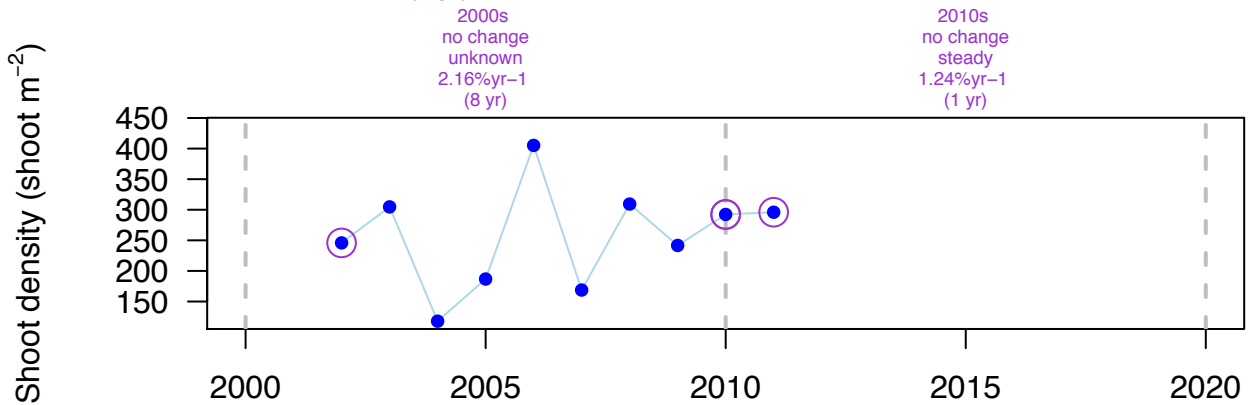

225\_cover

Guillén et al. 2013

SITE: Tabarca La Nao (Spain – Mediterranean) – Po (-6 m)

OVERALL: Net = -3.86 %; Rate = -0.49 % yr<sup>-1</sup>; Perc Final = 96 % > no change

DECADAL: YES (9 yr)

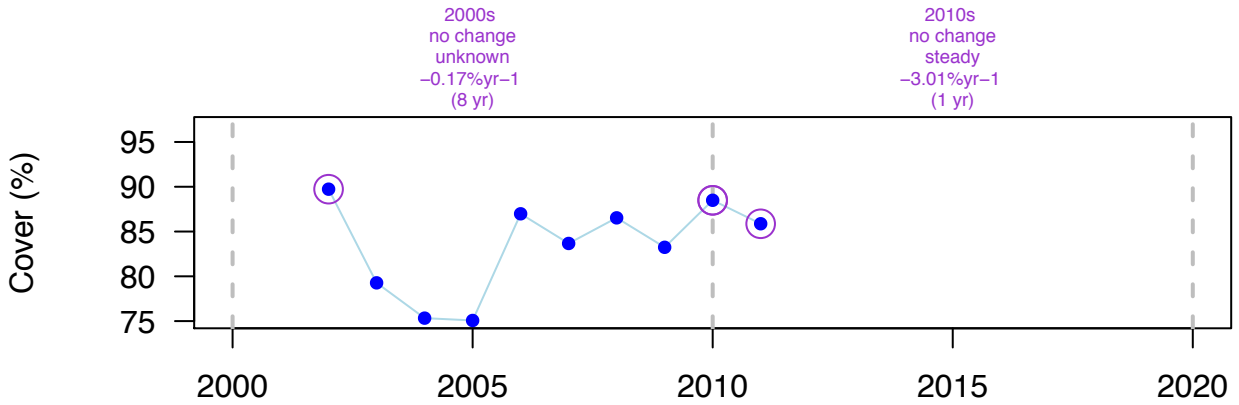

225\_density

Guillén et al. 2013

SITE: Tabarca La Nao (Spain – Mediterranean) – Po (-6 m)

OVERALL: Net = 144.5 shoot m<sup>-2</sup>; Rate = 5.19 % yr<sup>-1</sup>; Perc Final = 160 % > increase

DECADAL: YES (9 yr)

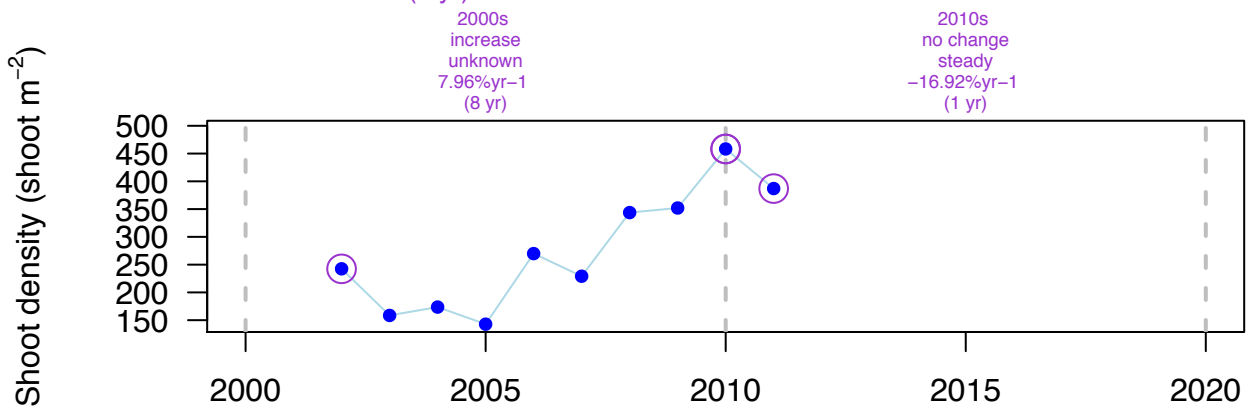

226\_cover

Guillén et al. 2013

SITE: Torrevieja (Spain – Mediterranean) – Po (-11 m)

OVERALL: Net = 26.4 %; Rate = 5.39 % yr<sup>-1</sup>; Perc Final = 146 % > increase

DECADAL: NO (7 yr)

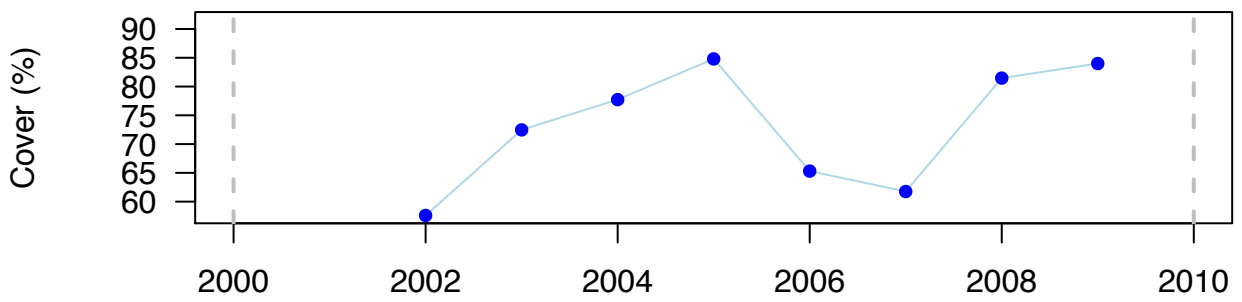

226\_density

Guillén et al. 2013

SITE: Torrevieja (Spain – Mediterranean) – Po (-11 m)

OVERALL: Net = 2.94 shoot m<sup>-2</sup>; Rate = 0.2 % yr<sup>-1</sup>; Perc Final = 101 % > no change

DECADAL: NO (7 yr)

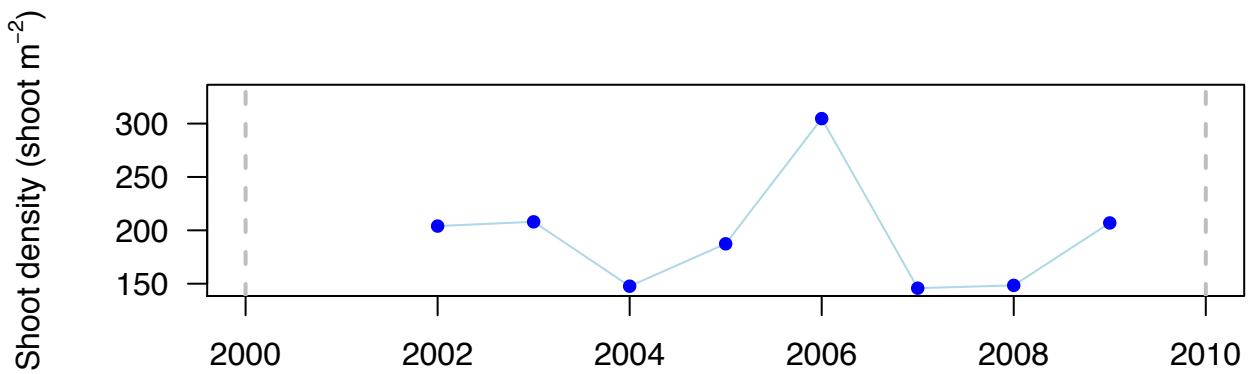

227\_cover

Guillén et al. 2013

SITE: Torrevieja (Spain – Mediterranean) – Po (–6 m)

OVERALL: Net = 37.15 %; Rate = 8.01 % yr<sup>-1</sup>; Perc Final = 162 % > increase

DECADAL: NO (6 yr)

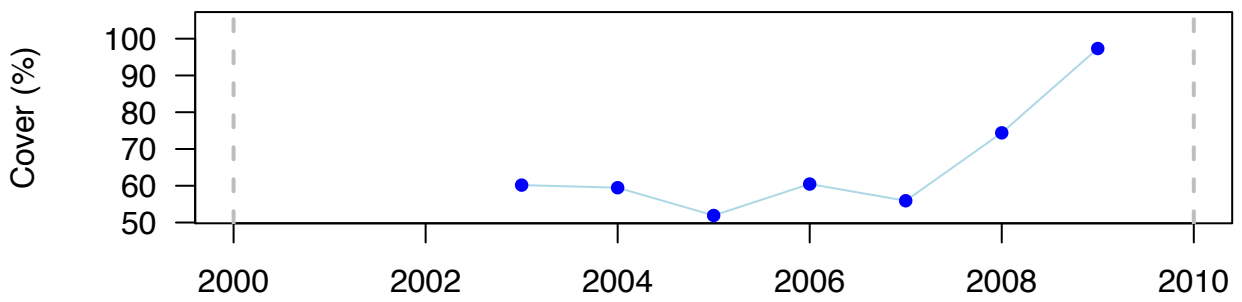

227\_density

Guillén et al. 2013

SITE: Torrevieja (Spain – Mediterranean) – Po (–6 m)

OVERALL: Net = 98.13 shoot m<sup>-2</sup>; Rate = 4.82 % yr<sup>-1</sup>; Perc Final = 134 % > increase

DECADAL: NO (6 yr)

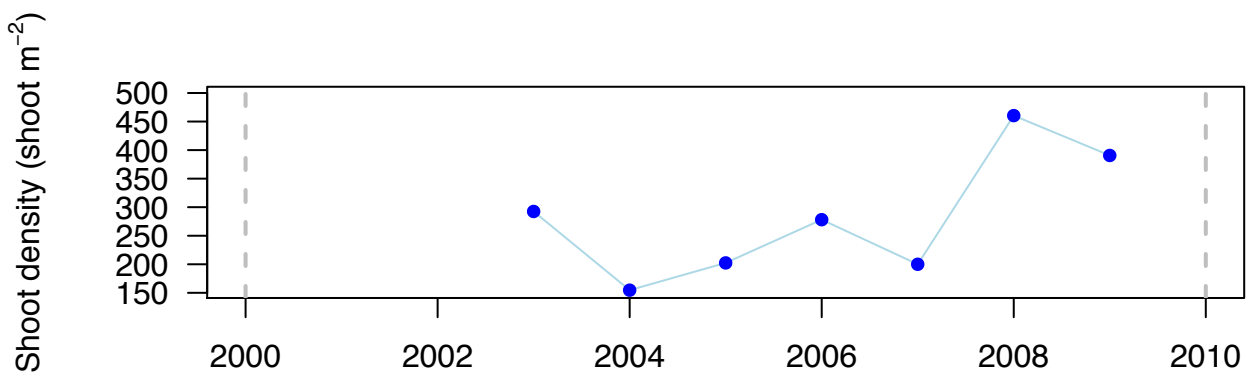

228\_cover

Ramos-Esplá et al. 2006, 2007

SITE: Pilar de la Horadada (Spain – Mediterranean) – Po (-15.5 m)

OVERALL: Net = -5.89 %; Rate = -3.16 % yr<sup>-1</sup>; Perc Final = 94 % > no change

DECADAL: NO (2 yr)

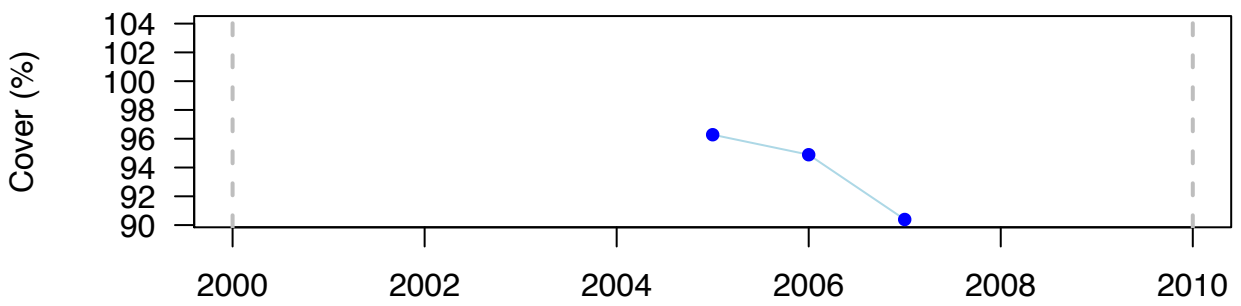

228\_density

Ramos-Esplá et al. 2006, 2007

SITE: Pilar de la Horadada (Spain – Mediterranean) – Po (-15.5 m)

OVERALL: Net = 33.57 shoot m<sup>-2</sup>; Rate = 5.91 % yr<sup>-1</sup>; Perc Final = 113 % > no change

DECADAL: NO (2 yr)

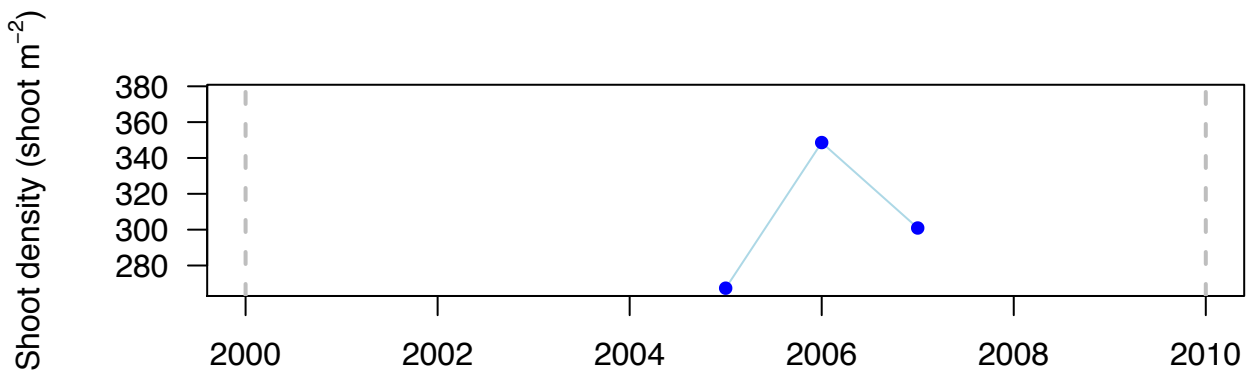

229\_cover

Ramos-Esplá et al. 2006, 2007

SITE: Cabo Roig (Spain – Mediterranean) – Po (-13.8 m)

OVERALL: Net = -3.44 %; Rate = -1.97 % yr<sup>-1</sup>; Perc Final = 96 % > no change

DECADAL: NO (2 yr)

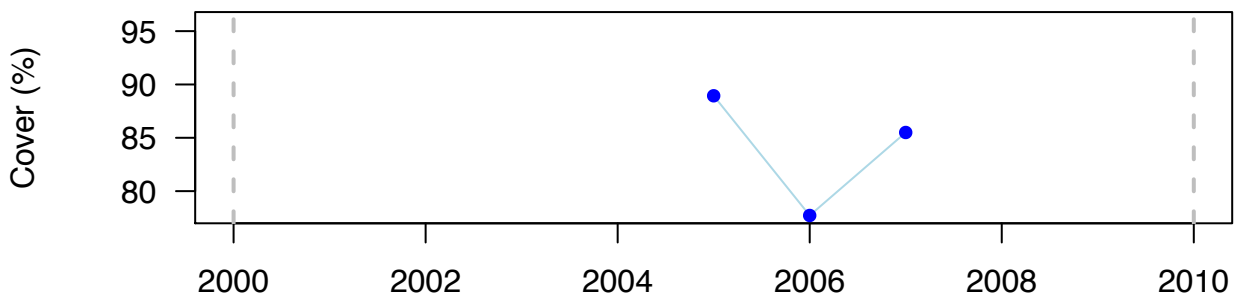

229\_density

Ramos-Esplá et al. 2006, 2007

SITE: Cabo Roig (Spain – Mediterranean) – Po (-13.8 m)

OVERALL: Net = 41.2 shoot m<sup>-2</sup>; Rate = 6.91 % yr<sup>-1</sup>; Perc Final = 115 % > no change

DECADAL: NO (2 yr)

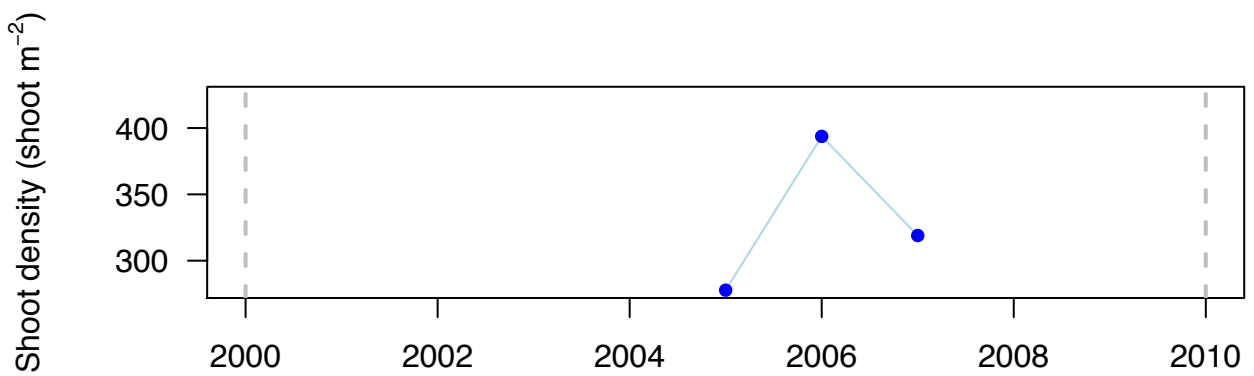



230\_area

Boudouresque et al. 2006

SITE: Marseilles (entire) (France – Mediterranean) – Po (? m)

OVERALL: Net = -208 ha; Rate = -0.62 % yr<sup>-1</sup>; Perc Final = 56 % > decrease

DECADAL: YES (94 yr)

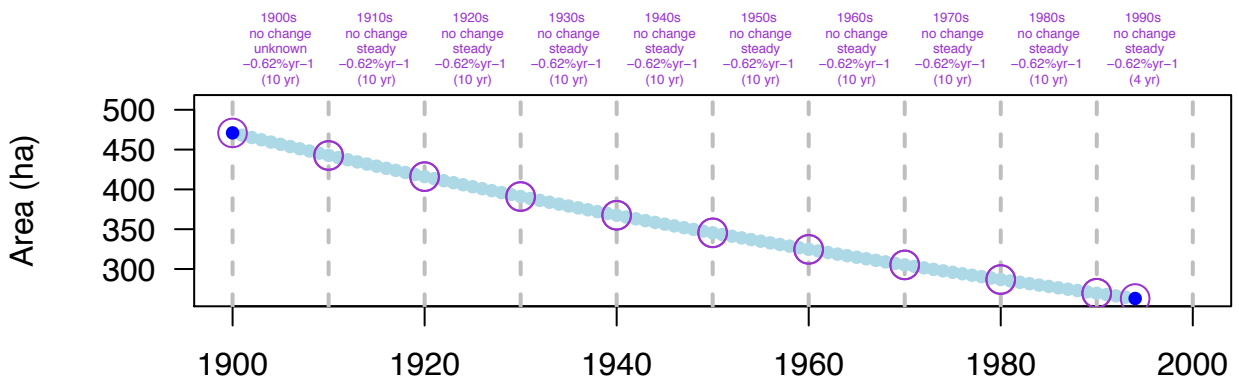

231\_cover

Ramos-Esplá et al. 2006, 2007, 2008, 2009, 2010

SITE: Cabo de Santa Pola (Spain – Mediterranean) – Po (-14.5 m)

OVERALL: Net = 5.41 %; Rate = 1.19 % yr<sup>-1</sup>; Perc Final = 106 % > no change

DECADAL: NO (5 yr)

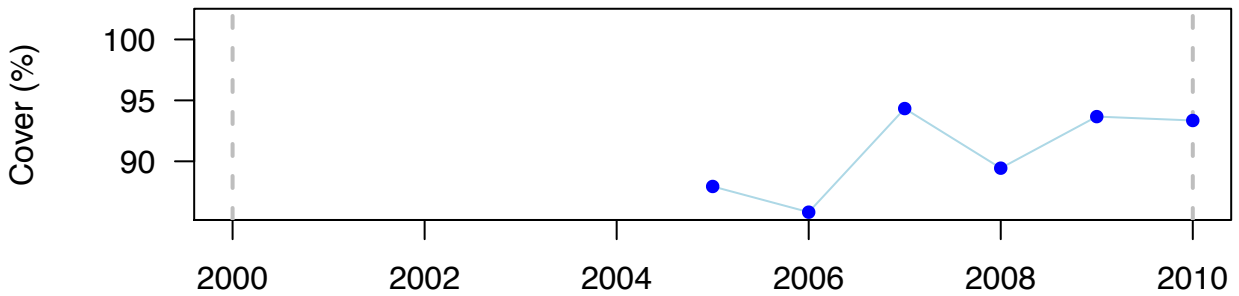

231\_density

Ramos-Esplá et al. 2006, 2007, 2008, 2009, 2010

SITE: Cabo de Santa Pola (Spain – Mediterranean) – Po (-14.5 m)

OVERALL: Net = -84.03 shoot m<sup>-2</sup>; Rate = -5.65 % yr<sup>-1</sup>; Perc Final = 75 % > no change

DECADAL: NO (5 yr)

Shoot density (shoot m<sup>-2</sup>)

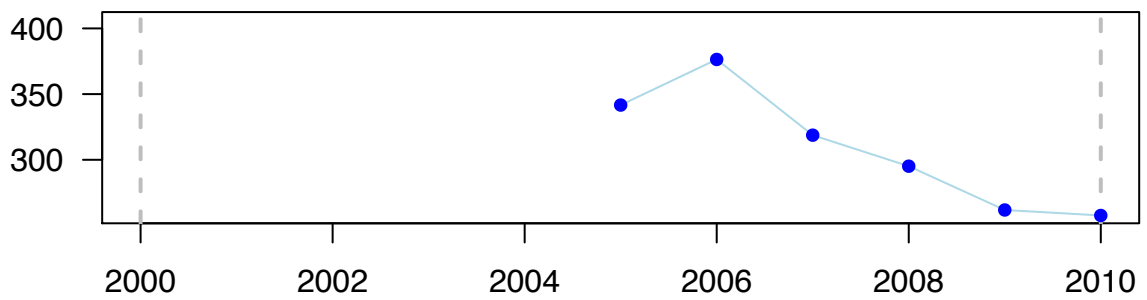

232\_cover

Ramos-Esplá et al. 2006, 2007, 2008, 2009, 2010, 2011

SITE: Alicante (Spain – Mediterranean) – Po (-16.8 m)

OVERALL: Net = -17.11 %; Rate = -9.39 % yr<sup>-1</sup>; Perc Final = 57 % > decrease

DECADAL: NO (6 yr)

Cover (%)

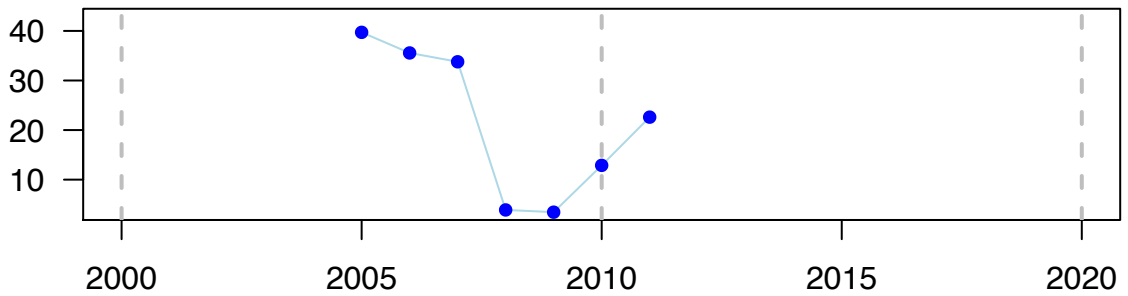

232\_density

Ramos-Esplá et al. 2006, 2007, 2008, 2009, 2010, 2011

SITE: Alicante (Spain – Mediterranean) – Po (-16.8 m)

OVERALL: Net = -97.92 shoot m<sup>-2</sup>; Rate = -18.39 % yr<sup>-1</sup>; Perc Final = 33 % > decrease

DECADAL: NO (6 yr)

Shoot density (shoot m<sup>-2</sup>)

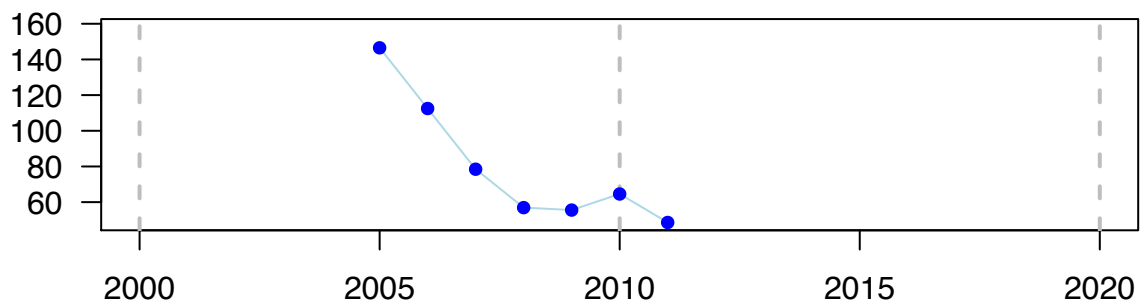

233\_cover

Ramos-Esplá et al. 2006, 2007, 2008

SITE: Cabo Huertas (Spain – Mediterranean) – Po (-14 m)

OVERALL: Net = -9.39 %; Rate = -3.9 % yr<sup>-1</sup>; Perc Final = 89 % > no change

DECADAL: NO (3 yr)

Cover (%)

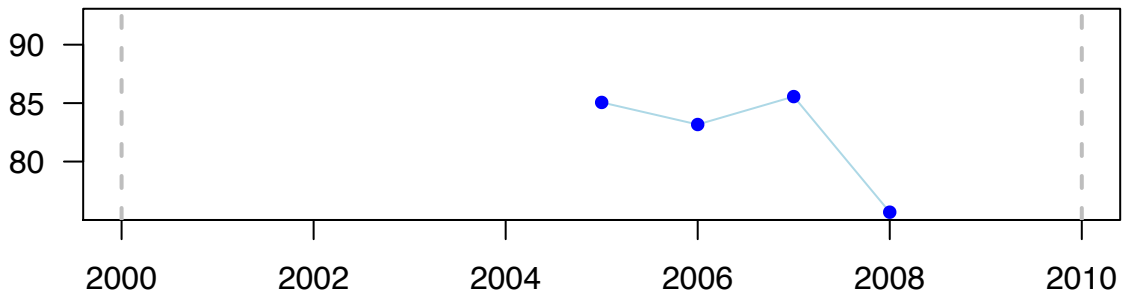

233\_density

Ramos-Esplá et al. 2006, 2007, 2008

SITE: Cabo Huertas (Spain – Mediterranean) – Po (-14 m)

OVERALL: Net = -9.73 shoot m<sup>-2</sup>; Rate = -1.02 % yr<sup>-1</sup>; Perc Final = 97 % > no change

DECADAL: NO (3 yr)

Shoot density (shoot m<sup>-2</sup>)

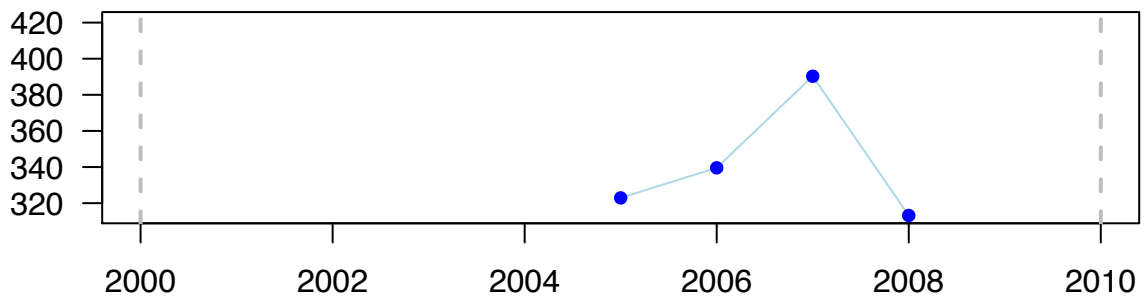

235\_cover

Ramos-Esplá et al. 2006, 2007, 2008

SITE: Benidorm (Spain – Mediterranean) – Po (-14 m)

OVERALL: Net = -9.45 %; Rate = -3.35 % yr<sup>-1</sup>; Perc Final = 90 % > no change

DECADAL: NO (3 yr)

Cover (%)

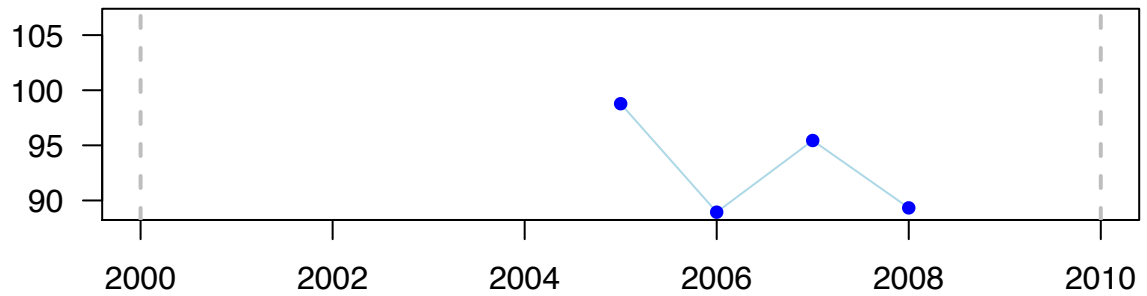

235\_density

Ramos-Esplá et al. 2006, 2007, 2008

SITE: Benidorm (Spain – Mediterranean) – Po (-14 m)

OVERALL: Net = 13.19 shoot m<sup>-2</sup>; Rate = 2.14 % yr<sup>-1</sup>; Perc Final = 107 % > no change

DECADAL: NO (3 yr)

Shoot density (shoot m<sup>-2</sup>)

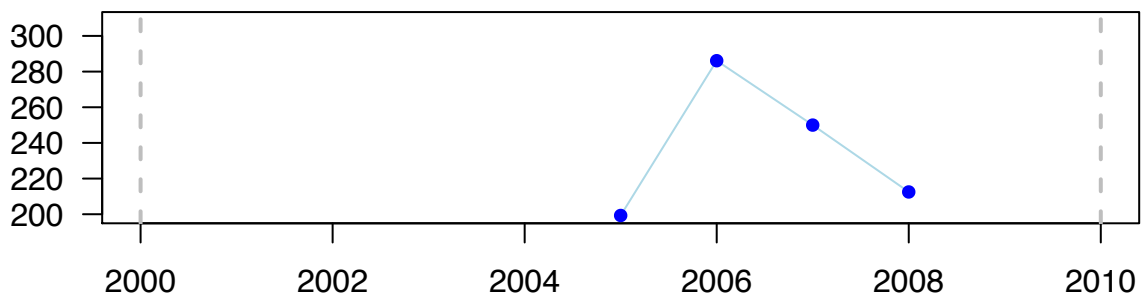

236\_cover

Ramos-Esplá et al. 2006, 2007, 2008, 2009, 2010, 2011

SITE: Altea (Spain – Mediterranean) – Po (-15 m)

OVERALL: Net = -1.56 %; Rate = -0.27 % yr<sup>-1</sup>; Perc Final = 98 % > no change

DECADAL: NO (6 yr)

Cover (%)

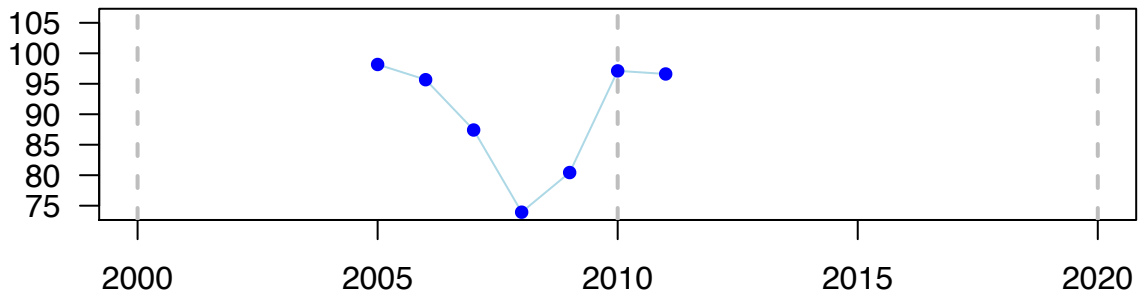

236\_density

Ramos-Esplá et al. 2006, 2007, 2008, 2009, 2010, 2011

SITE: Altea (Spain – Mediterranean) – Po (-15 m)

OVERALL: Net = -102.08 shoot m<sup>-2</sup>; Rate = -8.02 % yr<sup>-1</sup>; Perc Final = 62 % > decrease

DECADAL: NO (6 yr)

Shoot density (shoot m<sup>-2</sup>)

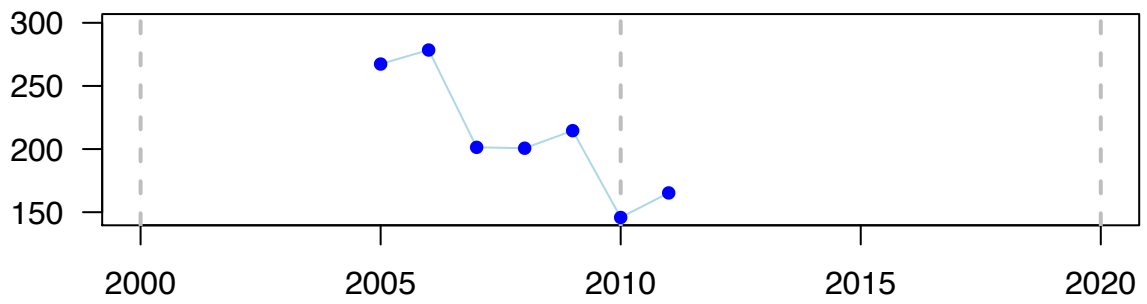

237\_cover

Ramos-Esplá et al. 2006, 2007, 2008, 2009, 2010

SITE: Calpe (Spain – Mediterranean) – Po (-14 m)

OVERALL: Net = 10.28 %; Rate = 2.23 % yr<sup>-1</sup>; Perc Final = 112 % > no change

DECADAL: NO (5 yr)

Cover (%)

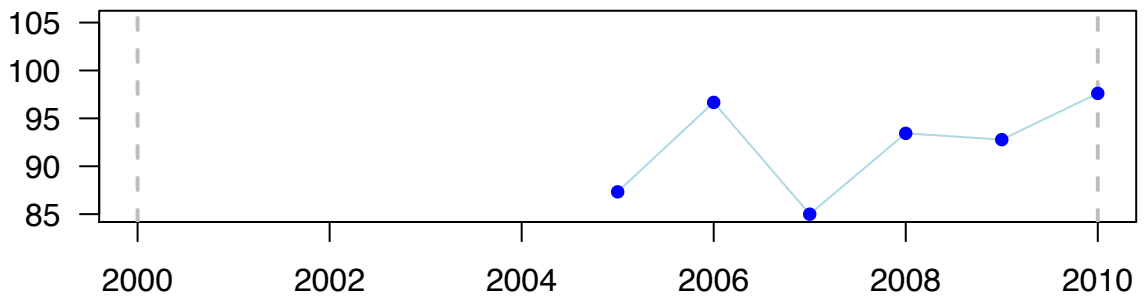

237\_density

Ramos-Esplá et al. 2006, 2007, 2008, 2009, 2010

SITE: Calpe (Spain – Mediterranean) – Po (-14 m)

OVERALL: Net = -95.83 shoot m<sup>-2</sup>; Rate = -6.71 % yr<sup>-1</sup>; Perc Final = 71 % > decrease

DECADAL: NO (5 yr)

Shoot density (shoot m<sup>-2</sup>)

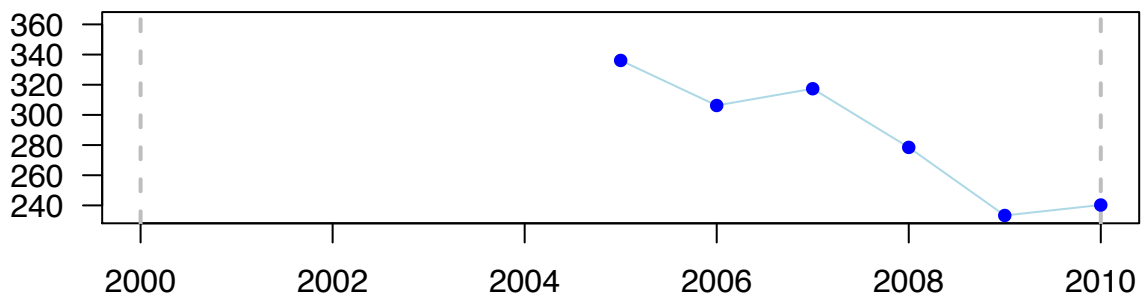

238\_cover

Ramos-Esplá et al. 2006, 2007, 2008

SITE: Jávea (Spain – Mediterranean) – Po (-15 m)

OVERALL: Net = 23.6 %; Rate = 11.28 % yr<sup>-1</sup>; Perc Final = 140 % > increase

DECADAL: NO (3 yr)

Cover (%)

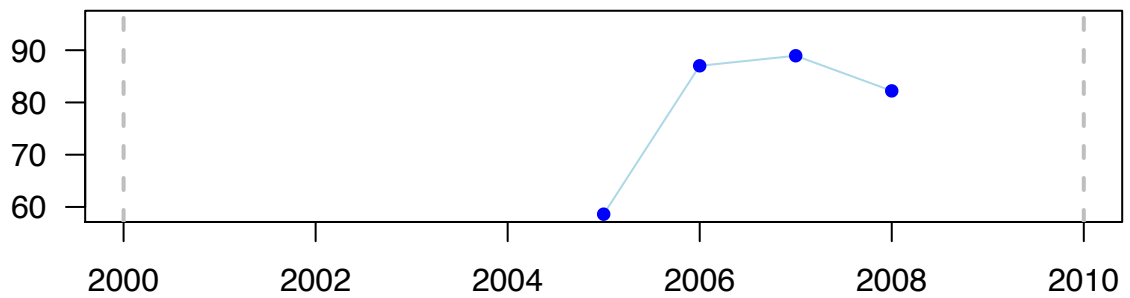

238\_density

Ramos-Esplá et al. 2006, 2007, 2008

SITE: Jávea (Spain – Mediterranean) – Po (-15 m)

OVERALL: Net = 56.95 shoot m<sup>-2</sup>; Rate = 6.91 % yr<sup>-1</sup>; Perc Final = 123 % > no change

DECADAL: NO (3 yr)

Shoot density (shoot m<sup>-2</sup>)

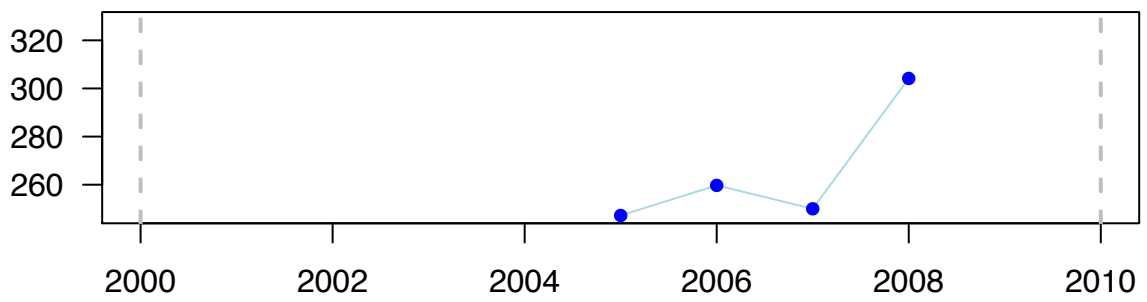

239\_cover

Ramos-Esplá et al. 2006, 2007, 2008

SITE: Denia (Spain – Mediterranean) – Po (-15 m)

OVERALL: Net = -5.5 %; Rate = -4.07 % yr<sup>-1</sup>; Perc Final = 89 % > no change

DECADAL: NO (3 yr)

Cover (%)

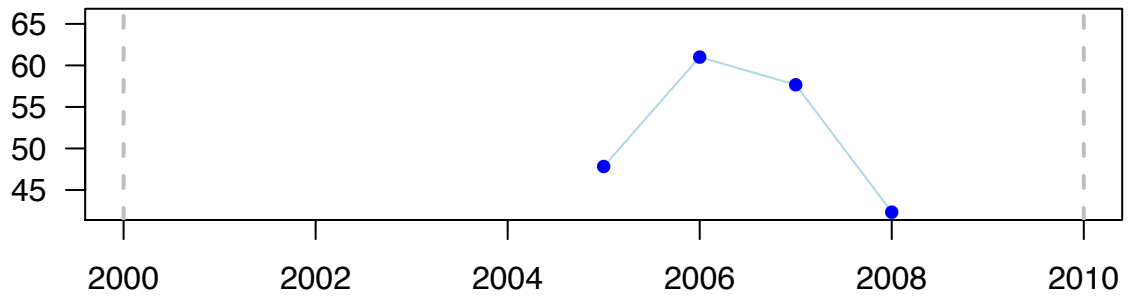



239\_density

Ramos-Esplá et al. 2006, 2007, 2008

SITE: Denia (Spain – Mediterranean) – Po (-15 m)

OVERALL: Net = 85.42 shoot m<sup>-2</sup>; Rate = 11.2 % yr<sup>-1</sup>; Perc Final = 140 % > increase

DECADAL: NO (3 yr)

Shoot density (shoot m<sup>-2</sup>)

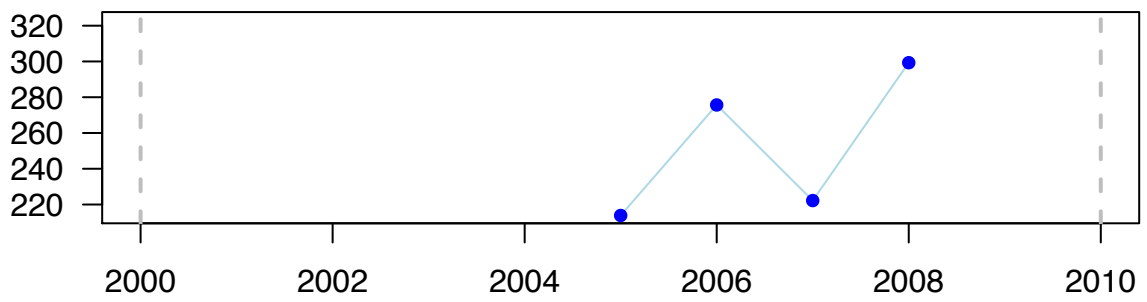

240\_cover

Ramos-Esplá et al. 2006, 2007, 2008, 2009, 2010

SITE: Castellón (Spain – Mediterranean) – Po (-15.5 m)

OVERALL: Net = -1.61 %; Rate = -9.76 % yr<sup>-1</sup>; Perc Final = 61 % > decrease

DECADAL: NO (5 yr)

Cover (%)

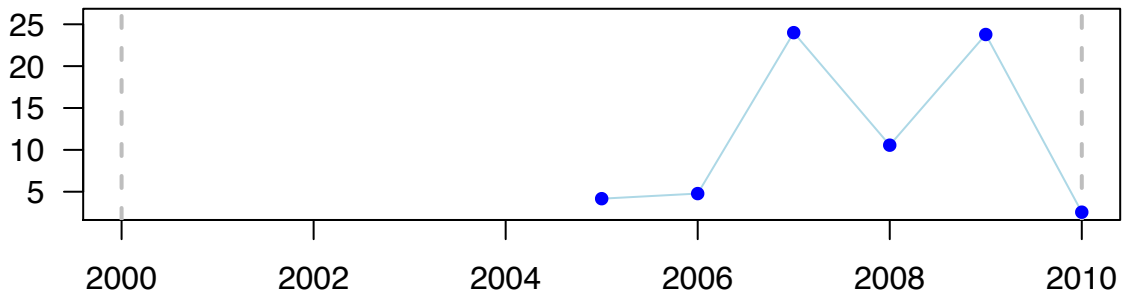

240\_density

Ramos-Esplá et al. 2006, 2007, 2008, 2009, 2010

SITE: Castellón (Spain – Mediterranean) – Po (-15.5 m)

OVERALL: Net = -24.3 shoot m<sup>-2</sup>; Rate = -6.9 % yr<sup>-1</sup>; Perc Final = 71 % > decrease

DECADAL: NO (5 yr)

Shoot density (shoot m<sup>-2</sup>)

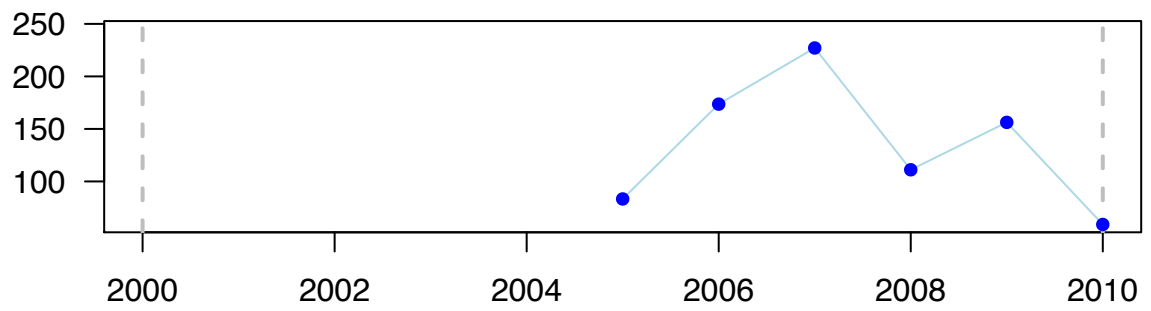

241\_cover

Ramos-Esplá et al. 2006, 2007, 2008, 2009, 2010, 2011

SITE: Benicassim (Spain – Mediterranean) – Po (-15 m)

OVERALL: Net = 10 %; Rate = 11.83 % yr<sup>-1</sup>; Perc Final = 203 % > increase

DECADAL: NO (6 yr)

Cover (%)

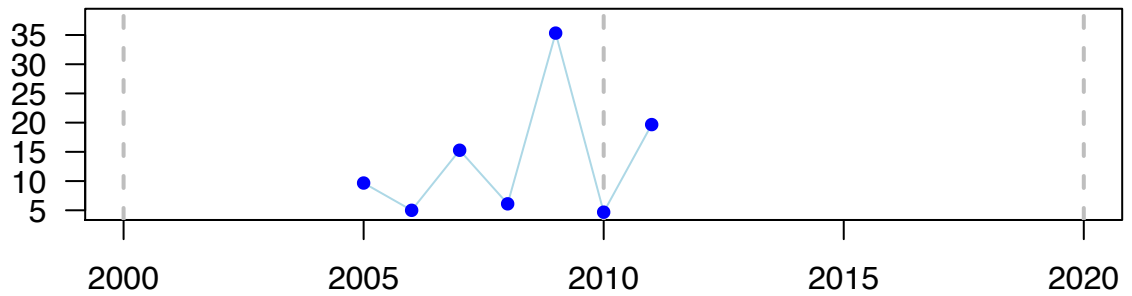

241\_density

Ramos-Esplá et al. 2006, 2007, 2008, 2009, 2010, 2011

SITE: Benicassim (Spain – Mediterranean) – Po (-15 m)

OVERALL: Net = -43.75 shoot m<sup>-2</sup>; Rate = -5.62 % yr<sup>-1</sup>; Perc Final = 71 % > decrease

DECADAL: NO (6 yr)

Shoot density (shoot m<sup>-2</sup>)

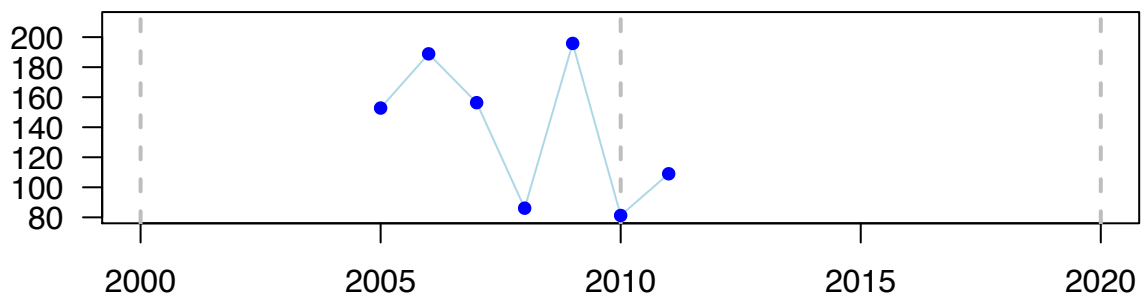

242\_cover

Ramos-Esplá et al. 2006, 2007, 2008, 2009, 2010, 2011

SITE: Oropesa (Spain – Mediterranean) – Po (-15 m)

OVERALL: Net = -22.33 %; Rate = -6.27 % yr<sup>-1</sup>; Perc Final = 73 % > decrease

DECADAL: NO (5 yr)

Cover (%)

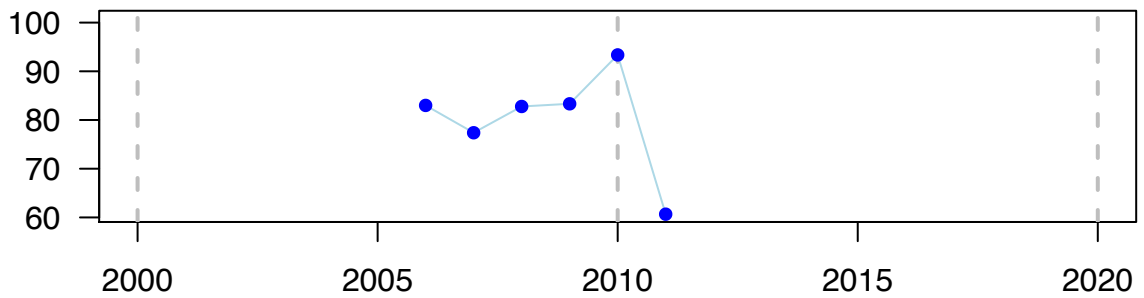

242\_density

Ramos-Esplá et al. 2006, 2007, 2008, 2009, 2010, 2011

SITE: Oropesa (Spain – Mediterranean) – Po (-15 m)

OVERALL: Net = -89.58 shoot m<sup>-2</sup>; Rate = -8.11 % yr<sup>-1</sup>; Perc Final = 67 % > decrease

DECADAL: NO (5 yr)

Shoot density (shoot m<sup>-2</sup>)

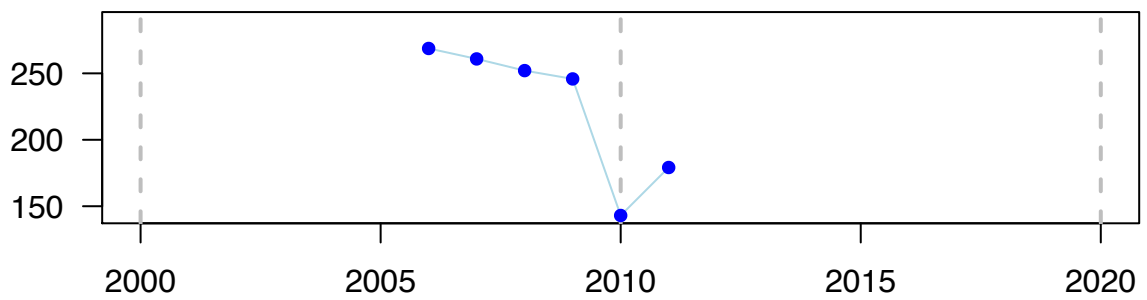

243\_cover

Sánchez-Lizaso et al. 2013

SITE: San Pedro del Pinatar (Spain – Mediterranean) – Po (-28.5 m)

OVERALL: Net = 1.3 %; Rate = 0.34 % yr<sup>-1</sup>; Perc Final = 102 % > no change

DECADAL: NO (7 yr)

Cover (%)

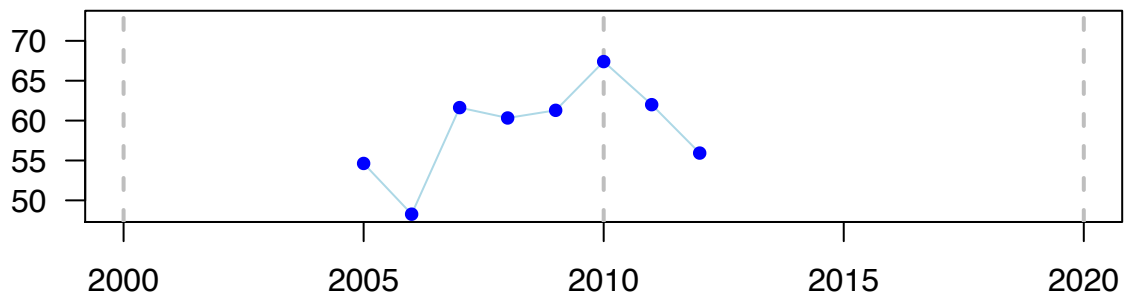

243\_density

Sánchez-Lizaso et al. 2013

SITE: San Pedro del Pinatar (Spain – Mediterranean) – Po (-28.5 m)

OVERALL: Net = -75 shoot m<sup>-2</sup>; Rate = -8.84 % yr<sup>-1</sup>; Perc Final = 54 % > decrease

DECADAL: NO (7 yr)

Shoot density (shoot m<sup>-2</sup>)

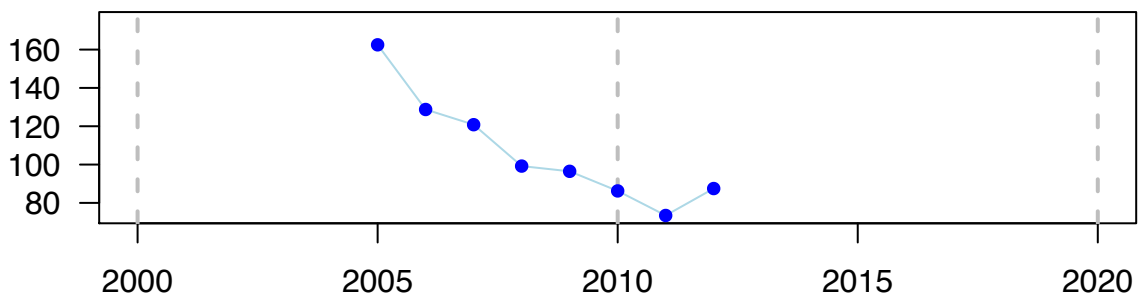

246\_area

Ferre-Vera 2012

SITE: Cala Fornells – Caló de Ses Llisès (Spain – Mediterranean) – Po (? m)

OVERALL: Net = -1.88 ha; Rate = -0.2 % yr<sup>-1</sup>; Perc Final = 97 % > no change

DECADAL: YES (18 yr)

Area (ha)

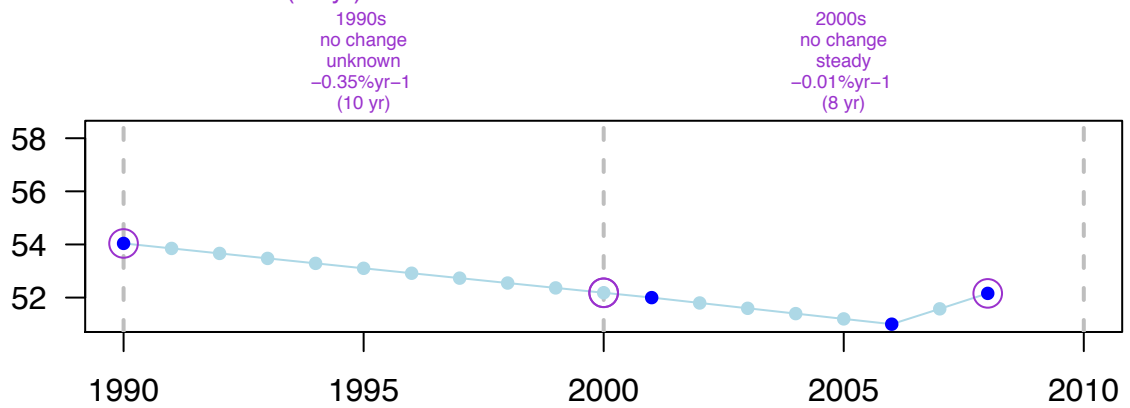

247\_area

Sánchez-Camacho 2003

SITE: S'illot – Cala Millor (Spain – Mediterranean) – Po (-10 m)

OVERALL: Net = -26.5 ha; Rate = -0.44 % yr<sup>-1</sup>; Perc Final = 82 % > decrease

DECADAL: YES (45 yr)

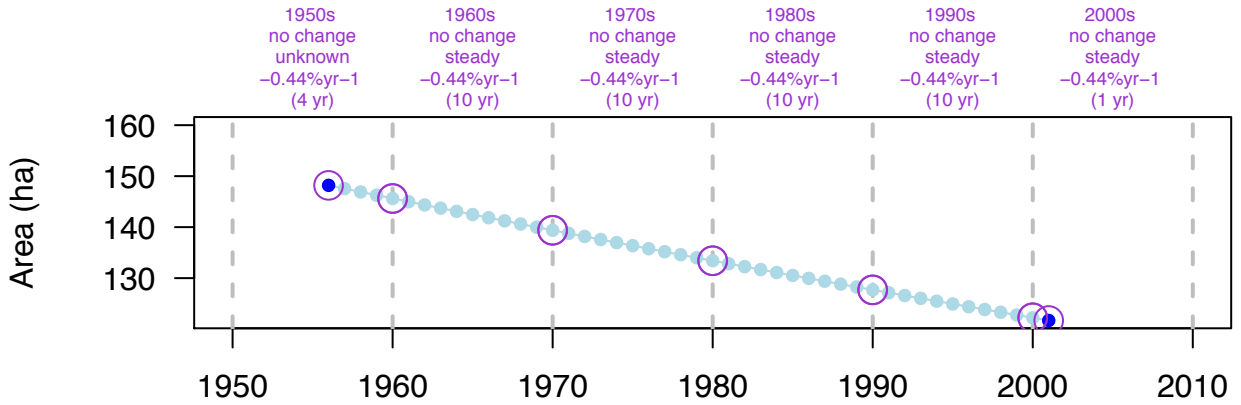

248\_area

Sánchez-Camacho 2003

SITE: Magalluf – Portals Nous (Spain – Mediterranean) – Po (-10 m)

OVERALL: Net = -27.6 ha; Rate = -0.27 % yr<sup>-1</sup>; Perc Final = 89 % > decrease

DECADAL: YES (45 yr)

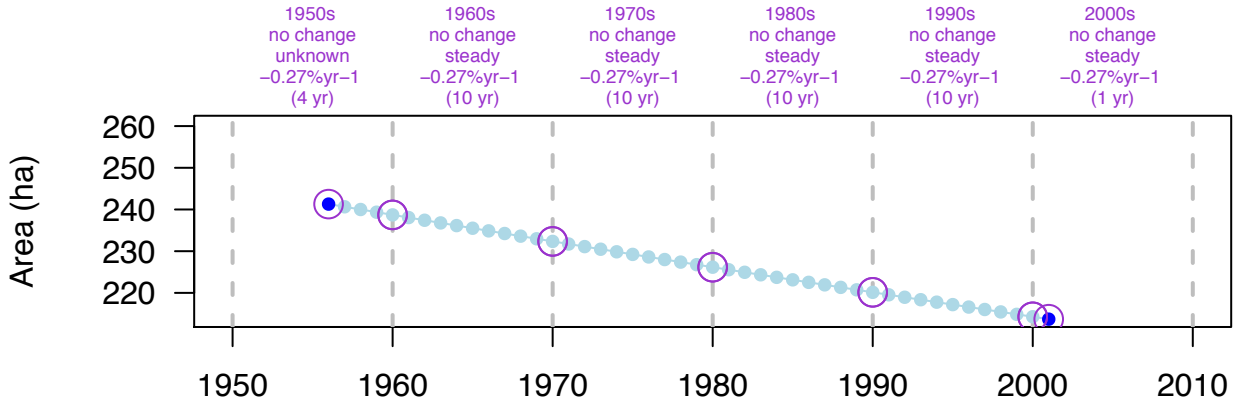

250\_density

Terrados and Medina-Pons 2011

SITE: Magalluf Bay – Sa Porrassa (Spain – Mediterranean) – Po (-8 m)

OVERALL: Net = 361.2 shoot m<sup>-2</sup>; Rate = 19.55 % yr<sup>-1</sup>; Perc Final = 219 % > increase

DECADAL: NO (4 yr)

Shoot density (shoot m<sup>-2</sup>)

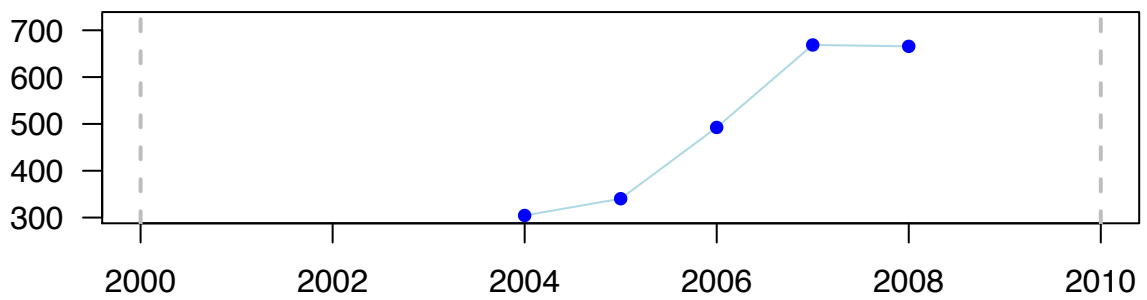

251\_density

Terrados and Medina-Pons 2011

SITE: Ses Salines (Spain – Mediterranean) – Po (-8 m)

OVERALL: Net = 229.9 shoot m<sup>-2</sup>; Rate = 7.14 % yr<sup>-1</sup>; Perc Final = 133 % > increase

DECADAL: NO (4 yr)

Shoot density (shoot m<sup>-2</sup>)

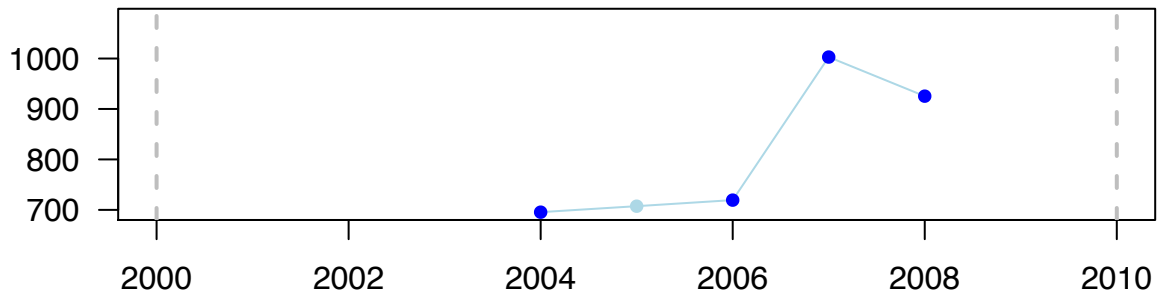

252\_density

Díaz-Almela et al. 2009

SITE: Magalluf Bay – Sa Porrassa (Spain – Mediterranean) – Po (-7 m)

OVERALL: Net = -174.69 shoot m<sup>-2</sup>; Rate = -9.29 % yr<sup>-1</sup>; Perc Final = 69 % > decrease

DECADAL: NO (4 yr)

Shoot density (shoot m<sup>-2</sup>)

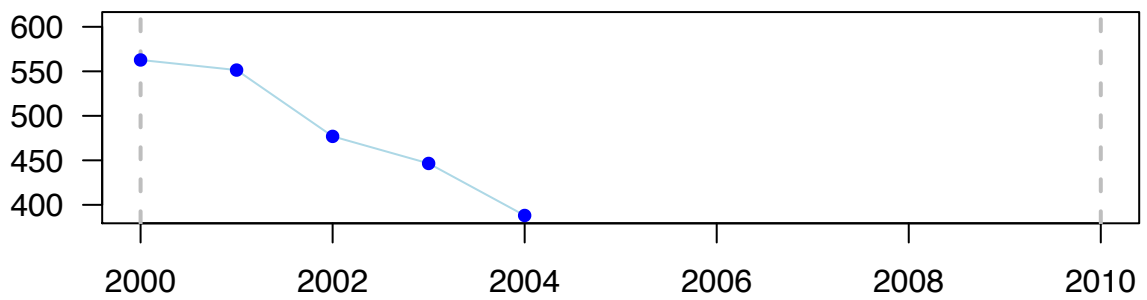

254\_area

Ruiz et al. 2001

SITE: Hornillo Bay (Spain – Mediterranean) – Po (? m)

OVERALL: Net = -11.29 ha; Rate = -3.32 % yr<sup>-1</sup>; Perc Final = 72 % > decrease

DECADAL: YES (10 yr)

Area (ha)

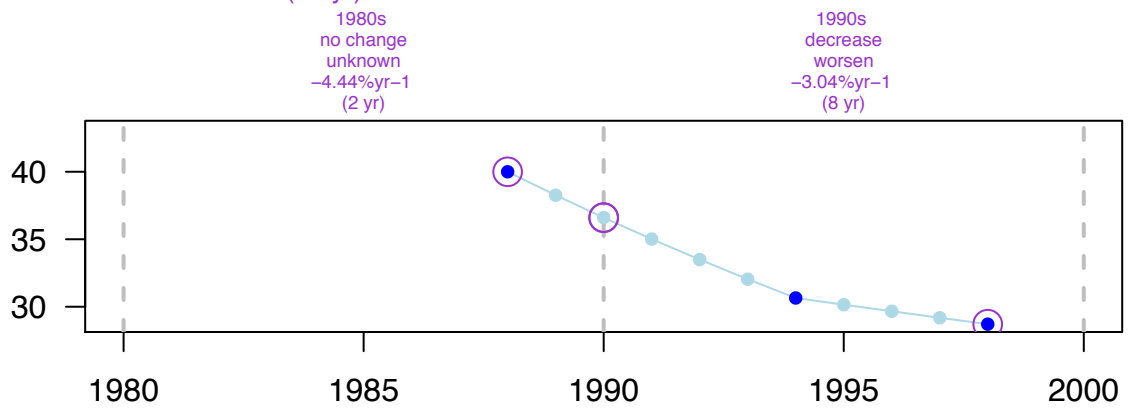



255\_area

Garmendia et al. 2013

SITE: Bidasoa Estuary (Spain – Atlantic) – Zn (0 m)

OVERALL: Net = 0.13 ha; Rate = 1.71 % yr<sup>-1</sup>; Perc Final = 107 % > no change

DECADAL: NO (4 yr)

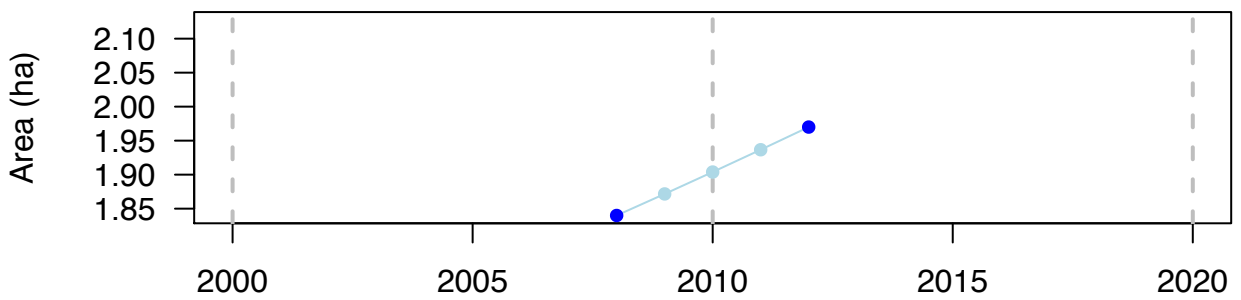

256\_area

Garmendia et al. 2013

SITE: Lea Estuary (Spain – Atlantic) – Zn (0 m)

OVERALL: Net = 0.48 ha; Rate = 37.2 % yr<sup>-1</sup>; Perc Final = 443 % > increase

DECADAL: NO (4 yr)

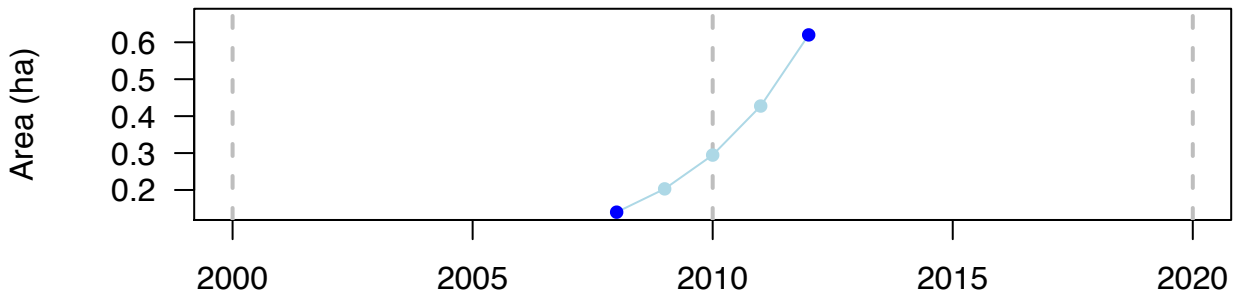

257\_area

Garmendia et al. 2013

SITE: Oka Estuary (Kanala) (Spain – Atlantic) – Zn (0 m)

OVERALL: Net = 0.12 ha; Rate = 3.07 % yr<sup>-1</sup>; Perc Final = 113 % > increase

DECADAL: NO (4 yr)

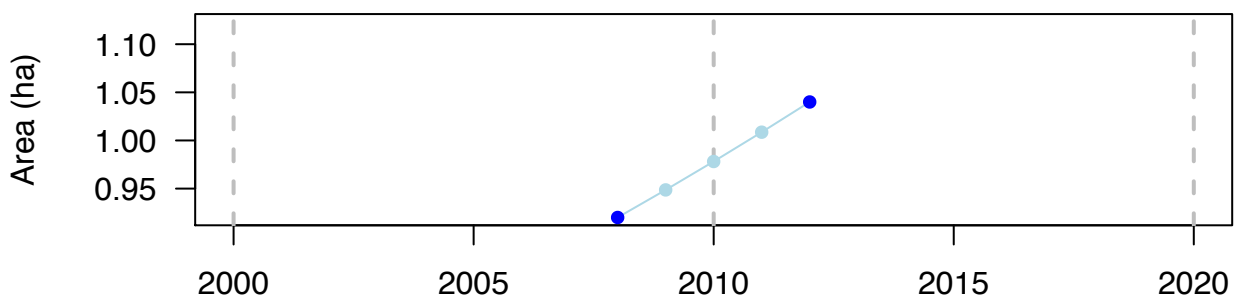

258\_area

Garmendia et al. 2013

SITE: Oka Estuary (Arketas) (Spain – Atlantic) – Zn (0 m)

OVERALL: Net = -1.33 ha; Rate = -30.73 % yr<sup>-1</sup>; Perc Final = 29 % > decrease

DECADAL: NO (4 yr)

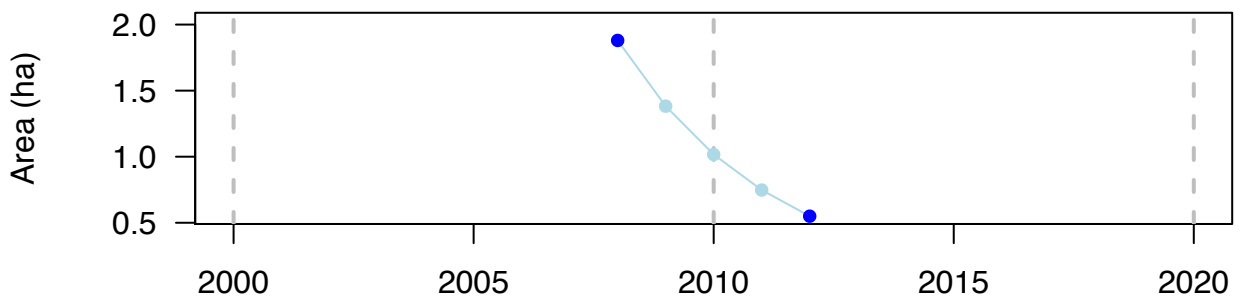

259\_area

Garmendia et al. 2013

SITE: Oka Estuary (San Kristobal) (Spain – Atlantic) – Zn (0 m)

OVERALL: Net = -2.3 ha; Rate = -3.44 % yr<sup>-1</sup>; Perc Final = 87 % > decrease

DECADAL: NO (4 yr)

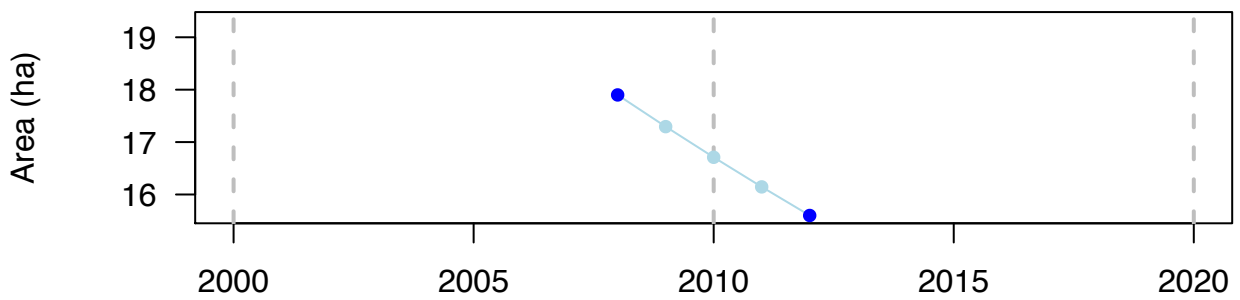

260\_biomass

Tuya et al. 2013

SITE: Risco Verde (Spain – Atlantic) – Cn (-10 m)

OVERALL: Net = -413.9 g dw m<sup>-2</sup>; Rate = -17.89 % yr<sup>-1</sup>; Perc Final = 6 % > decrease

DECADAL: YES (16 yr)

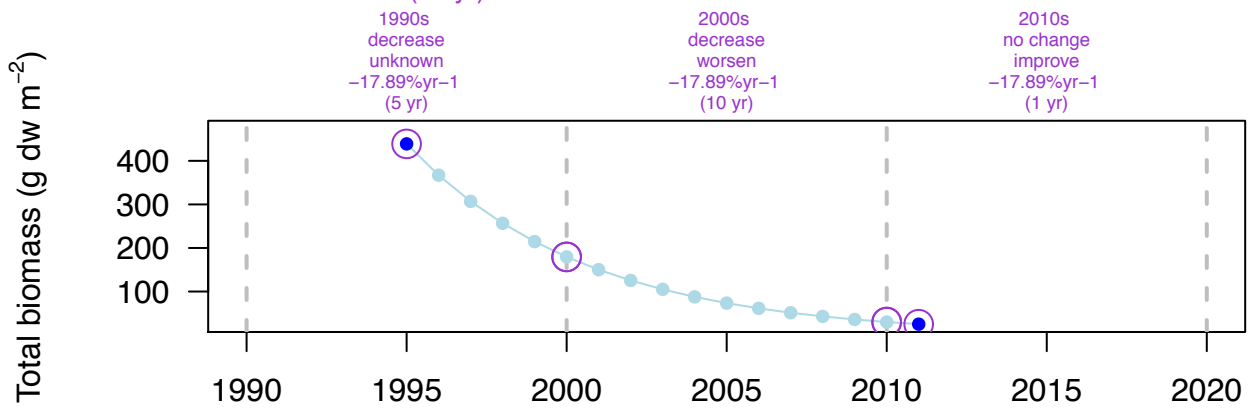

260\_density

Tuya et al. 2013

SITE: Risco Verde (Spain – Atlantic) – Cn (–10 m)

OVERALL: Net = –1666 shoot m<sup>-2</sup>; Rate = –20.42 % yr<sup>-1</sup>; Perc Final = 4 % > decrease

DECADAL: YES (16 yr)

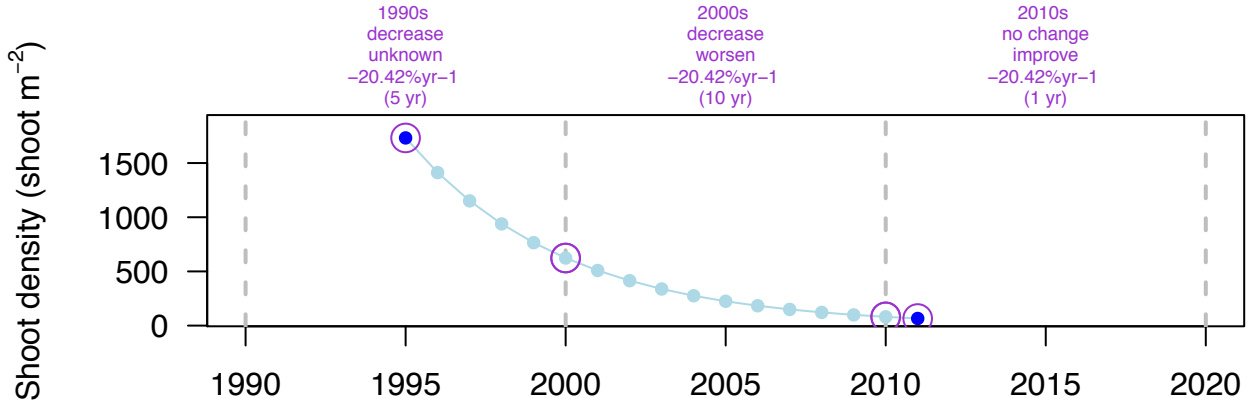

261\_biomass

Tuya et al. 2013

SITE: Roque Arinaga (Spain – Atlantic) – Cn (–14 m)

OVERALL: Net = –879 g dw m<sup>-2</sup>; Rate = –18.89 % yr<sup>-1</sup>; Perc Final = 5 % > decrease

DECADAL: YES (16 yr)

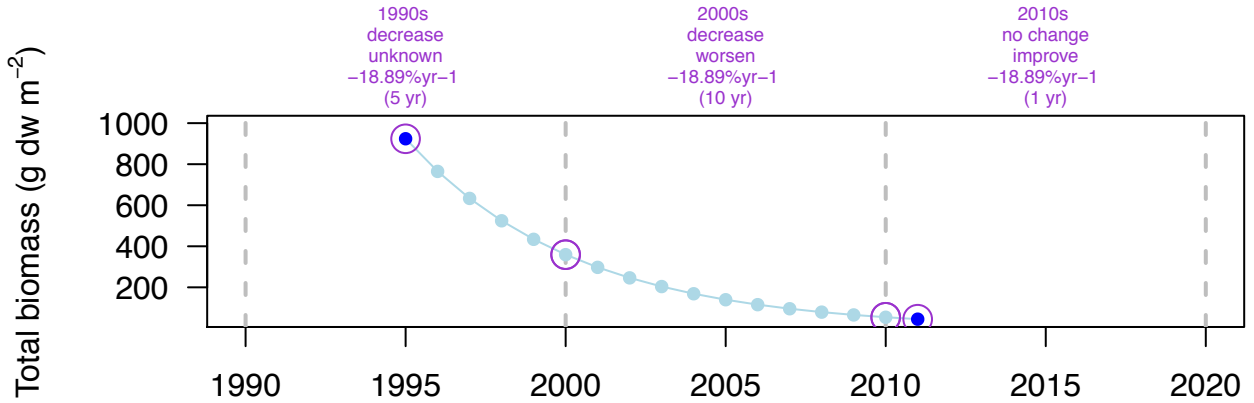

261\_density

Tuya et al. 2013

SITE: Roque Arinaga (Spain – Atlantic) – Cn (-14 m)

OVERALL: Net = -1186 shoot m<sup>-2</sup>; Rate = -15.52 % yr<sup>-1</sup>; Perc Final = 8 % > decrease

DECADAL: YES (16 yr)

Shoot density (shoot m<sup>-2</sup>)

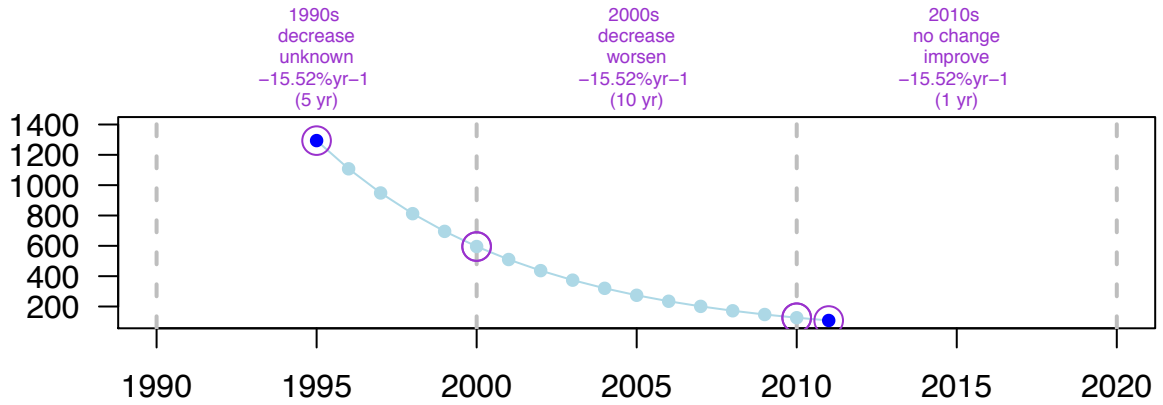

262\_biomass

Tuya et al. 2013

SITE: Arinaga (Spain – Atlantic) – Cn (-5 m)

OVERALL: Net = -612.5 g dw m<sup>-2</sup>; Rate = NA % yr<sup>-1</sup>; Perc Final = NA % > decrease

DECADAL: YES (16 yr)

Total biomass (g dw m<sup>-2</sup>)

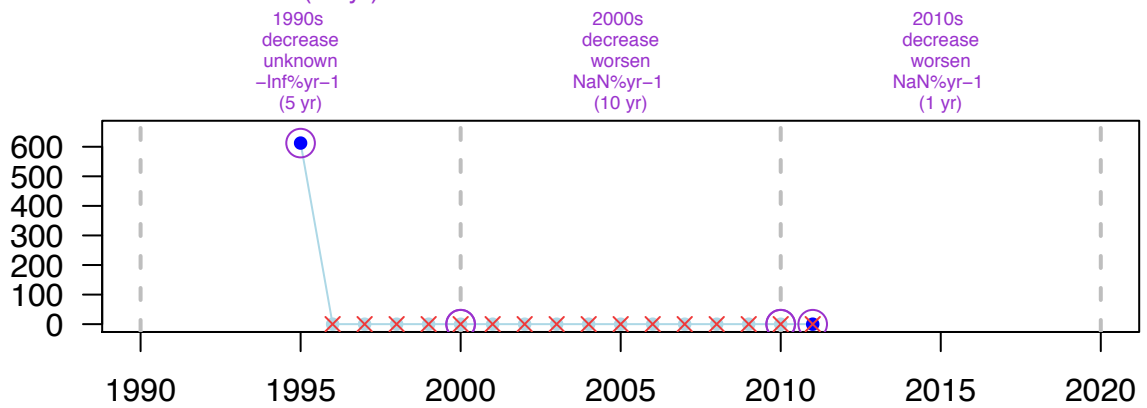

262\_density

Tuya et al. 2013

SITE: Arinaga (Spain – Atlantic) – Cn (-5 m)

OVERALL: Net = -3078 shoot m<sup>-2</sup>; Rate = NA % yr<sup>-1</sup>; Perc Final = NA % > decrease

DECADAL: YES (16 yr)

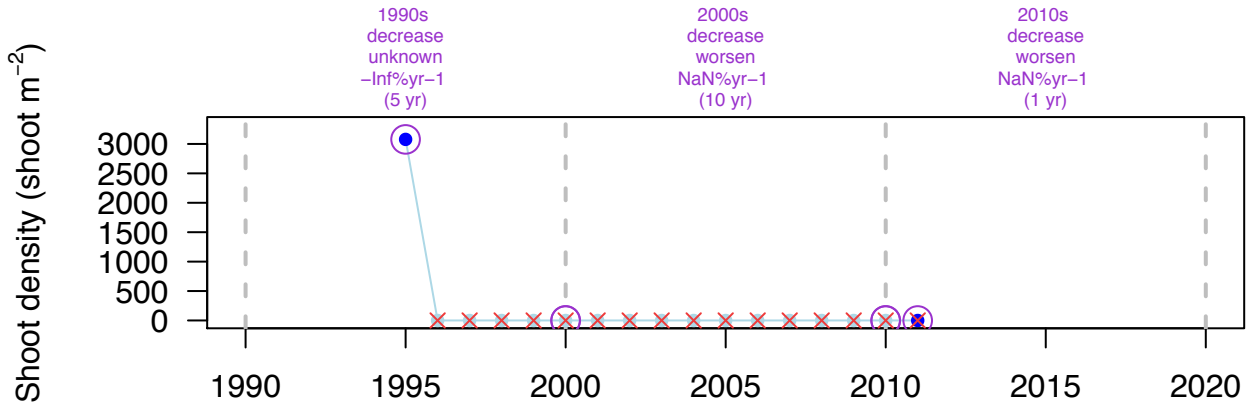

263\_biomass

Tuya et al. 2013

SITE: Gando (Spain – Atlantic) – Cn (-4 m)

OVERALL: Net = -337.3 g dw m<sup>-2</sup>; Rate = -15.77 % yr<sup>-1</sup>; Perc Final = 8 % > decrease

DECADAL: YES (16 yr)

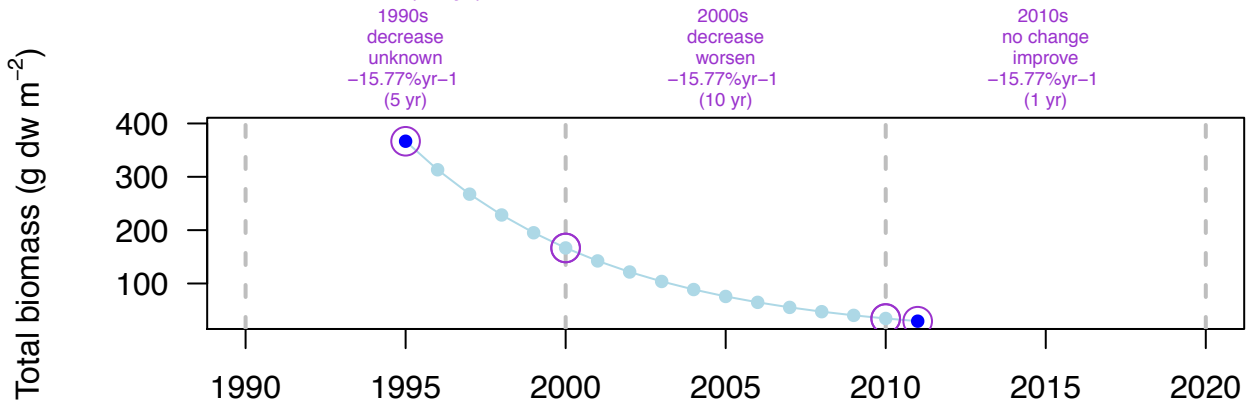

263\_density

Tuya et al. 2013

SITE: Gando (Spain – Atlantic) – Cn (–4 m)

OVERALL: Net = –1608 shoot m<sup>-2</sup>; Rate = –22.94 % yr<sup>-1</sup>; Perc Final = 3 % > decrease

DECADAL: YES (16 yr)

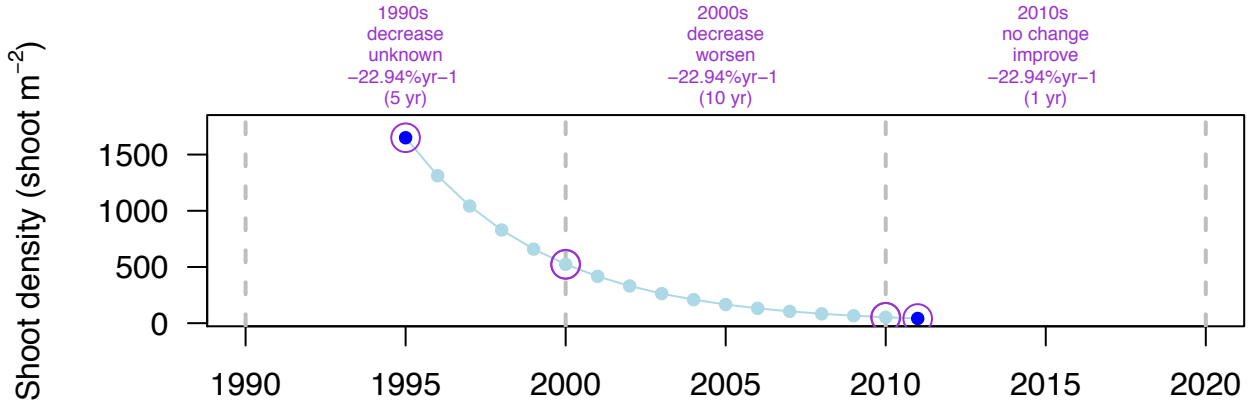

264\_biomass

Tuya et al. 2013

SITE: Pasito Blanco (Spain – Atlantic) – Cn (–8 m)

OVERALL: Net = –39.3 g dw m<sup>-2</sup>; Rate = –3.39 % yr<sup>-1</sup>; Perc Final = 58 % > decrease

DECADAL: YES (16 yr)

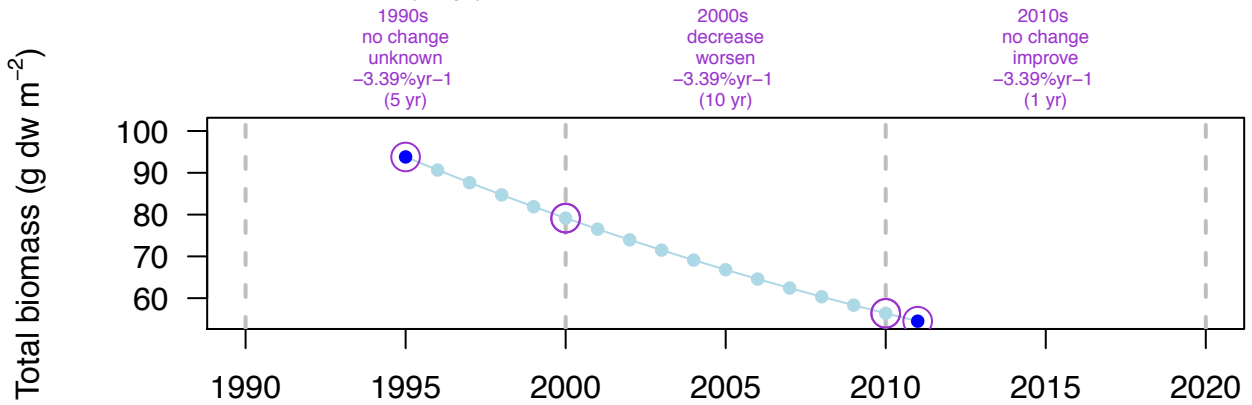

264\_density

Tuya et al. 2013

SITE: Pasito Blanco (Spain – Atlantic) – Cn (-8 m)

OVERALL: Net = -775 shoot m<sup>-2</sup>; Rate = -14.74 % yr<sup>-1</sup>; Perc Final = 9 % > decrease

DECADAL: YES (16 yr)

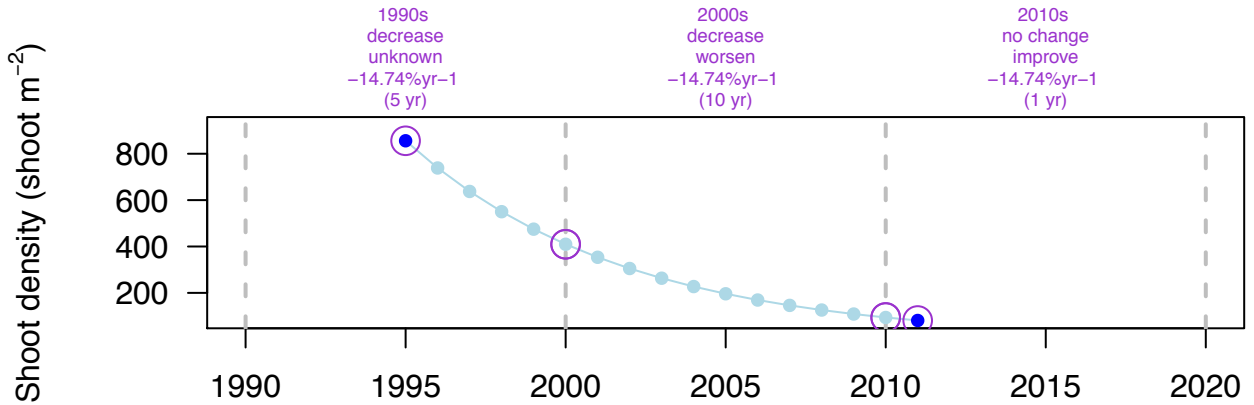

265\_area

Gil-Rodríguez et al. 2012

SITE: Marina del Arrecife (Spain – Atlantic) – Zn (0 m)

OVERALL: Net = 0.01 ha; Rate = 6.93 % yr<sup>-1</sup>; Perc Final = 200 % > increase

DECADAL: YES (10 yr)

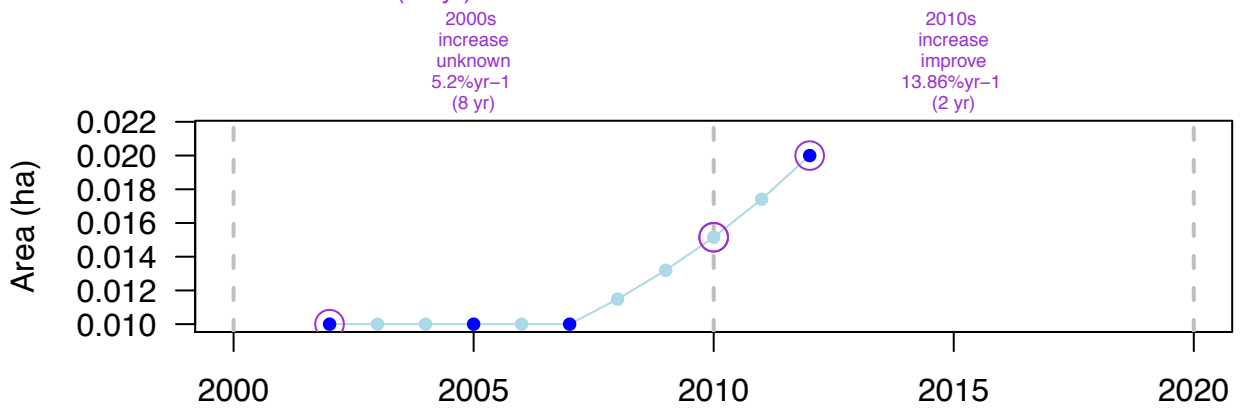



265\_cover

Gil-Rodríguez et al. 2012

SITE: Marina del Arrecife (Spain – Atlantic) – Zn (0 m)

OVERALL: Net = 13.6 %; Rate = 13.14 % yr<sup>-1</sup>; Perc Final = 372 % > increase

DECADAL: YES (10 yr)

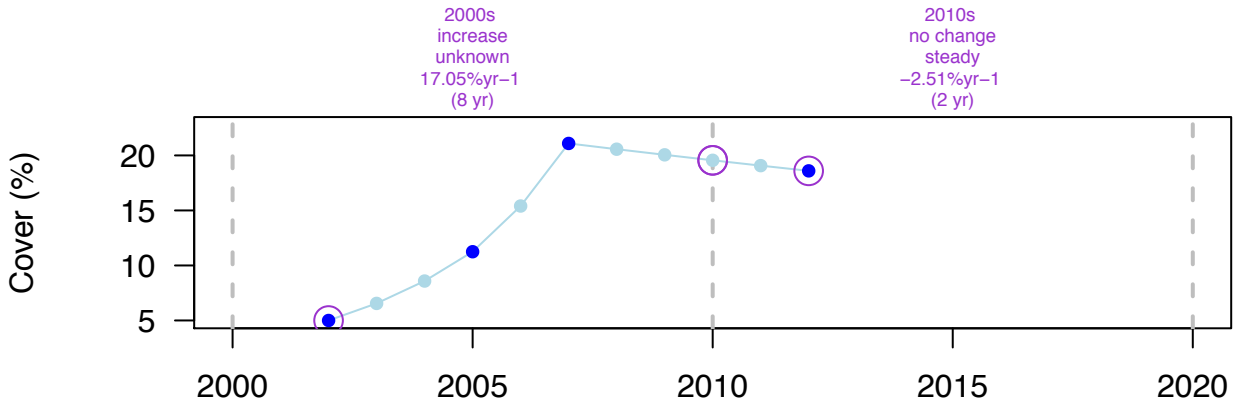

265\_density

Gil-Rodríguez et al. 2012

SITE: Marina del Arrecife (Spain – Atlantic) – Zn (0 m)

OVERALL: Net = 275.2 shoot m<sup>-2</sup>; Rate = 22.62 % yr<sup>-1</sup>; Perc Final = 960 % > increase

DECADAL: YES (10 yr)

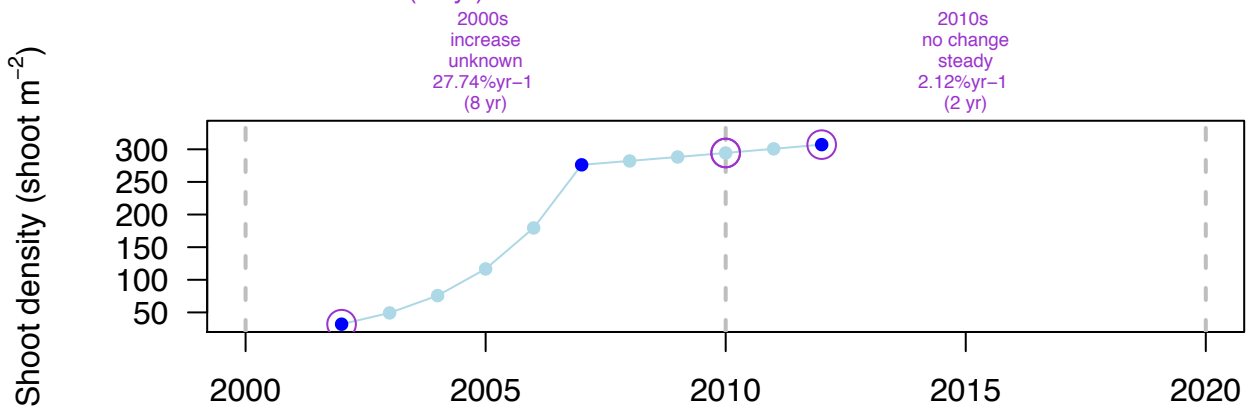

267\_cover

Moy (unpublished)

SITE: Amland (Norway – Atlantic) – Zm (–5 m)

OVERALL: Net = 50 %; Rate = 1.48 % yr<sup>-1</sup>; Perc Final = 300 % > increase

DECADAL: YES (74 yr)

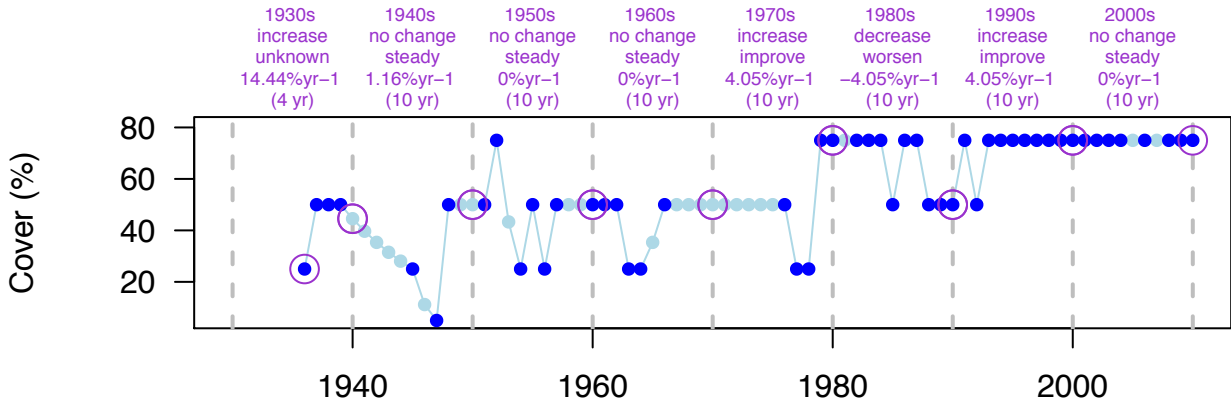

268\_cover

Moy (unpublished)

SITE: Hallangspollen (Norway – Atlantic) – Zm (–5 m)

OVERALL: Net = 50 %; Rate = 1.48 % yr<sup>-1</sup>; Perc Final = 300 % > increase

DECADAL: YES (74 yr)

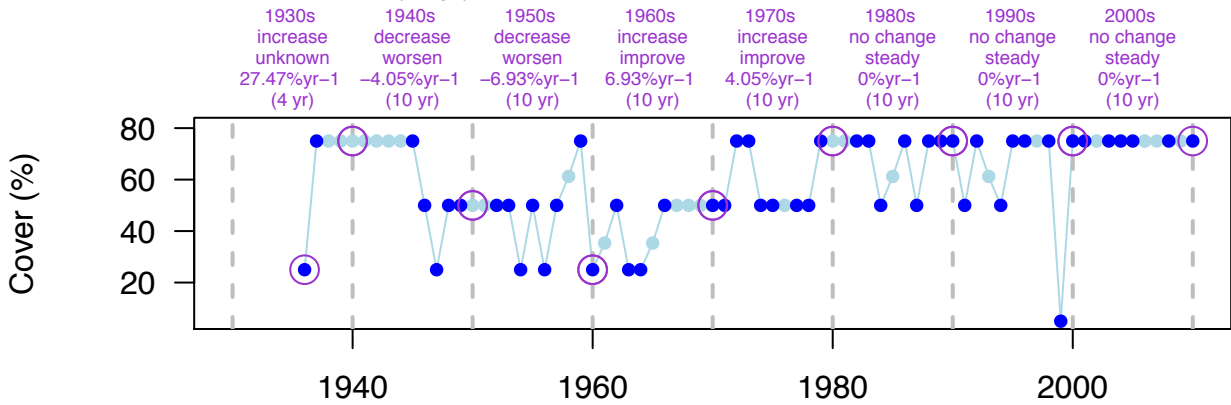

269\_cover

Moy (unpublished)

SITE: Lusekilen (Norway – Atlantic) – Zm (-5 m)

OVERALL: Net = 25 %; Rate = 0.94 % yr<sup>-1</sup>; Perc Final = 200 % > increase

DECADAL: YES (74 yr)

|                                                                 |                                                                   |                                                                   |                                                                  |                                                                   |                                                                  |                                                                |                                                                  |
|-----------------------------------------------------------------|-------------------------------------------------------------------|-------------------------------------------------------------------|------------------------------------------------------------------|-------------------------------------------------------------------|------------------------------------------------------------------|----------------------------------------------------------------|------------------------------------------------------------------|
| 1930s<br>increase<br>unknown<br>7.73%yr <sup>-1</sup><br>(4 yr) | 1940s<br>decrease<br>worsen<br>-19.19%yr <sup>-1</sup><br>(10 yr) | 1950s<br>increase<br>improve<br>23.03%yr <sup>-1</sup><br>(10 yr) | 1960s<br>no change<br>steady<br>2.03%yr <sup>-1</sup><br>(10 yr) | 1970s<br>no change<br>steady<br>-2.03%yr <sup>-1</sup><br>(10 yr) | 1980s<br>decrease<br>worsen<br>-6.93%yr <sup>-1</sup><br>(10 yr) | 1990s<br>no change<br>improve<br>0%yr <sup>-1</sup><br>(10 yr) | 2000s<br>increase<br>improve<br>6.93%yr <sup>-1</sup><br>(10 yr) |
|-----------------------------------------------------------------|-------------------------------------------------------------------|-------------------------------------------------------------------|------------------------------------------------------------------|-------------------------------------------------------------------|------------------------------------------------------------------|----------------------------------------------------------------|------------------------------------------------------------------|

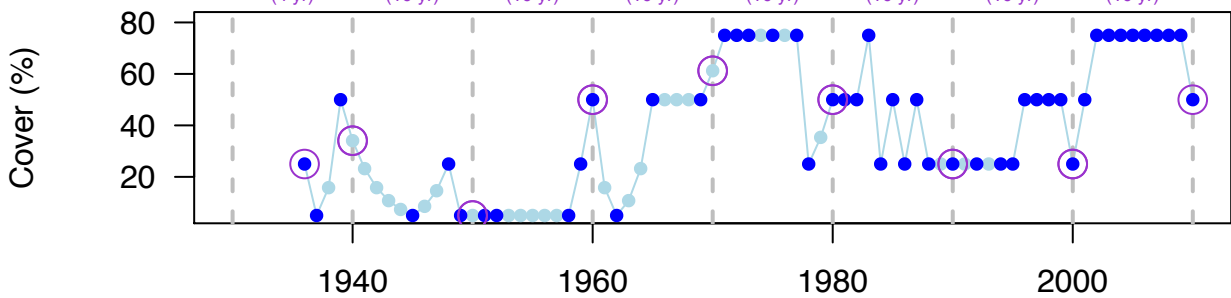

270\_cover

Moy (unpublished)

SITE: Soppekilen (Norway – Atlantic) – Zm (-5 m)

OVERALL: Net = 70 %; Rate = 3.66 % yr<sup>-1</sup>; Perc Final = 1500 % > increase

DECADAL: YES (74 yr)

|                                                                  |                                                                   |                                                                   |                                                                  |                                                                  |                                                                  |                                                                  |                                                               |
|------------------------------------------------------------------|-------------------------------------------------------------------|-------------------------------------------------------------------|------------------------------------------------------------------|------------------------------------------------------------------|------------------------------------------------------------------|------------------------------------------------------------------|---------------------------------------------------------------|
| 1930s<br>increase<br>unknown<br>47.97%yr <sup>-1</sup><br>(4 yr) | 1940s<br>decrease<br>worsen<br>-19.19%yr <sup>-1</sup><br>(10 yr) | 1950s<br>increase<br>improve<br>16.09%yr <sup>-1</sup><br>(10 yr) | 1960s<br>increase<br>improve<br>4.16%yr <sup>-1</sup><br>(10 yr) | 1970s<br>increase<br>improve<br>6.83%yr <sup>-1</sup><br>(10 yr) | 1980s<br>decrease<br>worsen<br>-4.05%yr <sup>-1</sup><br>(10 yr) | 1990s<br>increase<br>improve<br>4.05%yr <sup>-1</sup><br>(10 yr) | 2000s<br>no change<br>steady<br>0%yr <sup>-1</sup><br>(10 yr) |
|------------------------------------------------------------------|-------------------------------------------------------------------|-------------------------------------------------------------------|------------------------------------------------------------------|------------------------------------------------------------------|------------------------------------------------------------------|------------------------------------------------------------------|---------------------------------------------------------------|

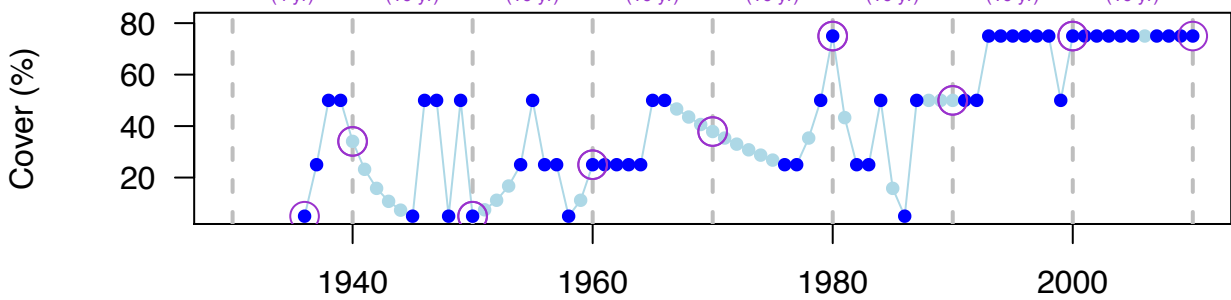

271\_cover

Moy (unpublished)

SITE: Sundet (Norway – Atlantic) – Zm (-5 m)

OVERALL: Net = 45 %; Rate = 3.11 % yr<sup>-1</sup>; Perc Final = 1000 % > increase

DECADAL: YES (74 yr)

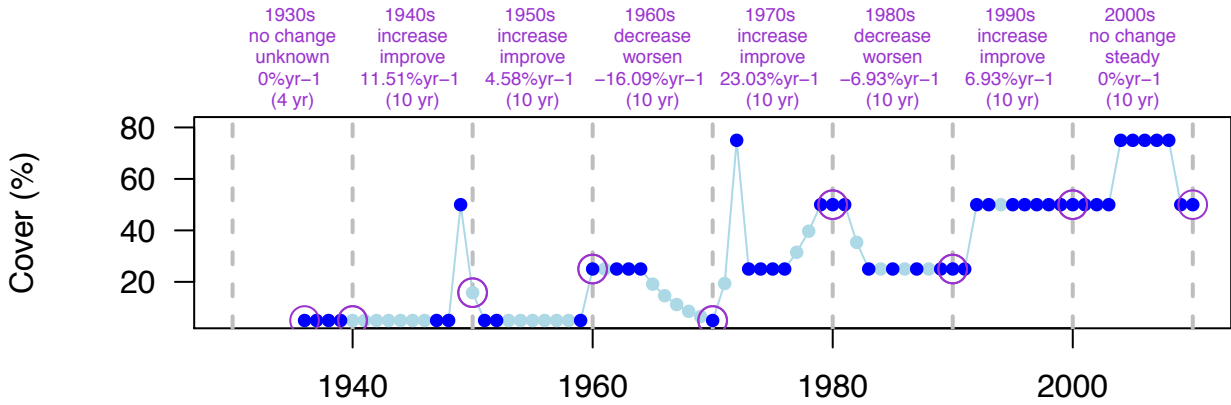

272\_area

Wilkes et al. 2017

SITE: Ballysadare Estuary (Ireland – Atlantic) – Zn (? m)

OVERALL: Net = 5.91 ha; Rate = 3.06 % yr<sup>-1</sup>; Perc Final = 117 % > increase

DECADAL: NO (5 yr)

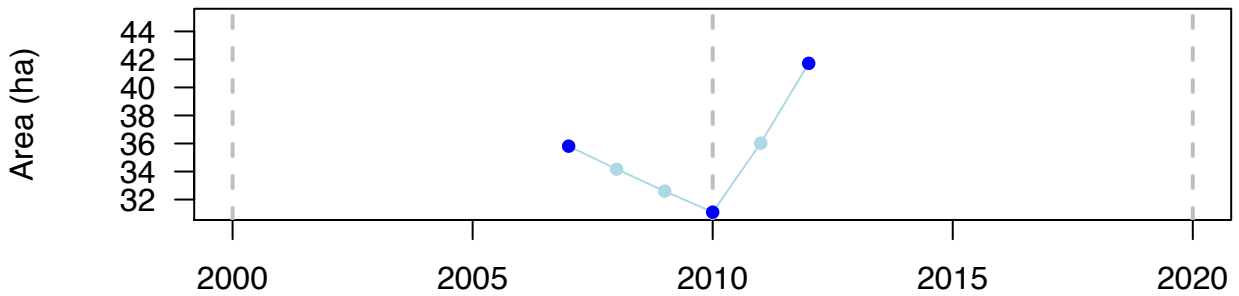

272\_cover

Wilkes et al. 2017

SITE: Ballysadare Estuary (Ireland – Atlantic) – Zn (? m)

OVERALL: Net = -7.53 %; Rate = -2.78 % yr<sup>-1</sup>; Perc Final = 87 % > no change

DECADAL: NO (5 yr)

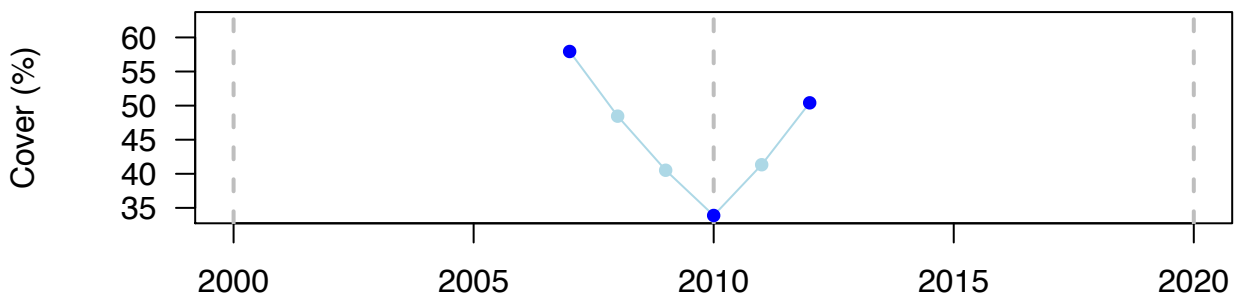

273\_area

Wilkes et al. 2017

SITE: Colligan Estuary (Ireland – Atlantic) – Zn (? m)

OVERALL: Net = 0.13 ha; Rate = 2.84 % yr<sup>-1</sup>; Perc Final = 112 % > increase

DECADAL: NO (4 yr)

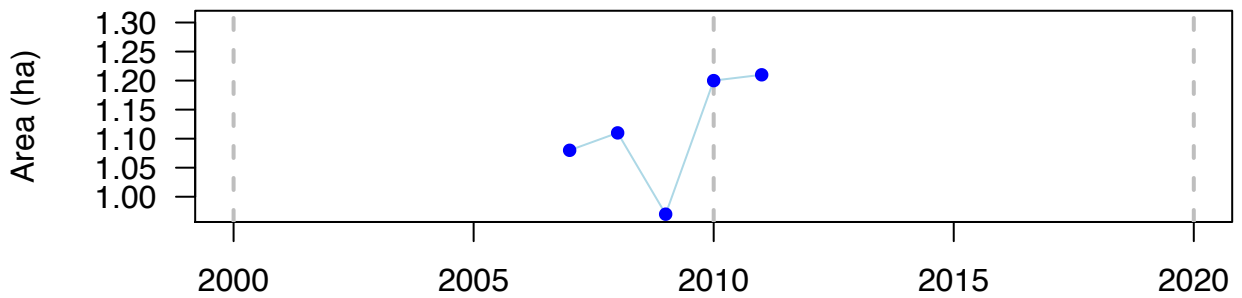

273\_cover

Wilkes et al. 2017

SITE: Colligan Estuary (Ireland – Atlantic) – Zn (? m)

OVERALL: Net = 16.42 %; Rate = 4.8 % yr<sup>-1</sup>; Perc Final = 121 % > no change

DECADAL: NO (4 yr)

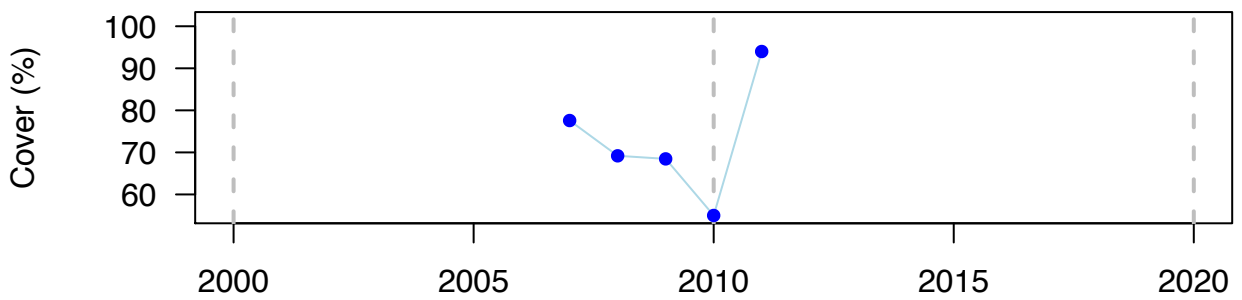

274\_area

Wilkes et al. 2017

SITE: Cromane (Ireland – Atlantic) – Zn (? m)

OVERALL: Net = 7.16 ha; Rate = 1.36 % yr<sup>-1</sup>; Perc Final = 104 % > no change

DECADAL: NO (3 yr)

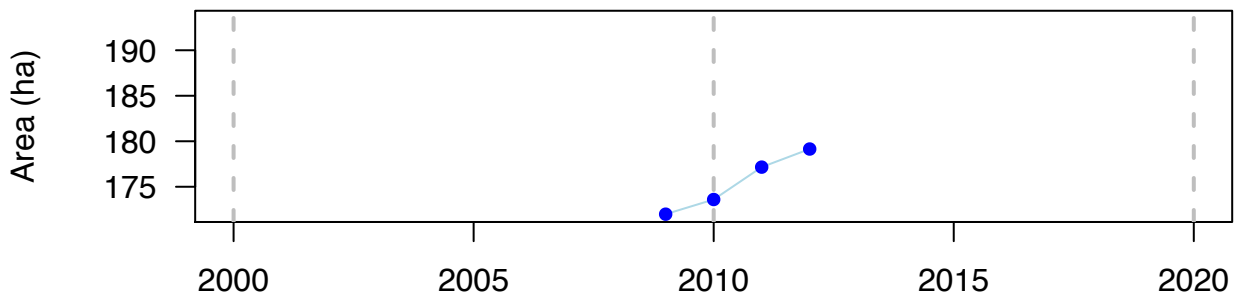

274\_cover

Wilkes et al. 2017

SITE: Cromane (Ireland – Atlantic) – Zn (? m)

OVERALL: Net = 0.6 %; Rate = 0.22 % yr<sup>-1</sup>; Perc Final = 101 % > no change

DECADAL: NO (3 yr)

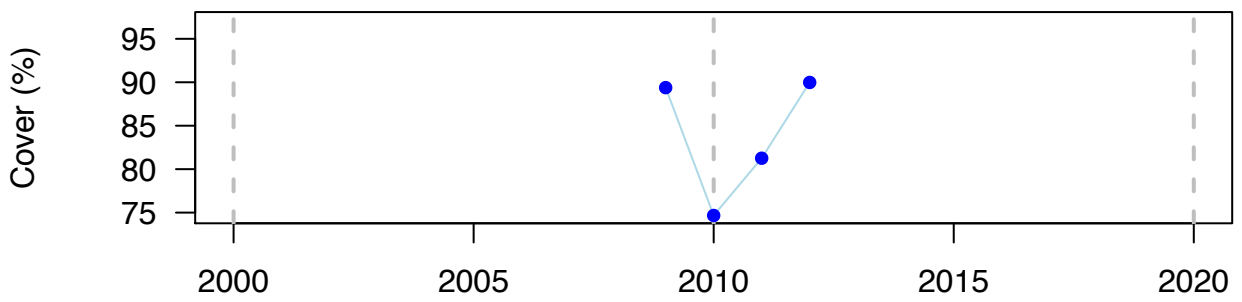

275\_area

Wilkes et al. 2017

SITE: Dublin Bay (Ireland – Atlantic) – Zn (? m)

OVERALL: Net = 0.29 ha; Rate = 3.45 % yr<sup>-1</sup>; Perc Final = 119 % > increase

DECADAL: NO (5 yr)

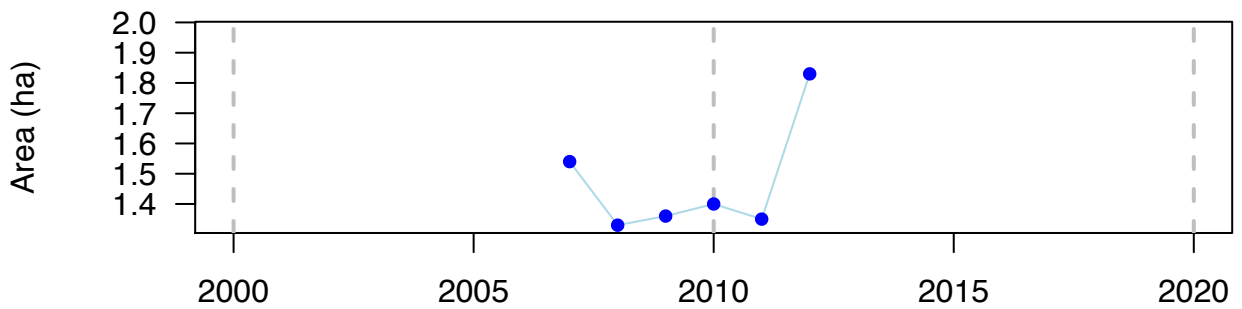

275\_cover

Wilkes et al. 2017

SITE: Dublin Bay (Ireland – Atlantic) – Zn (? m)

OVERALL: Net = -14.68 %; Rate = -4 % yr<sup>-1</sup>; Perc Final = 82 % > no change

DECADAL: NO (5 yr)

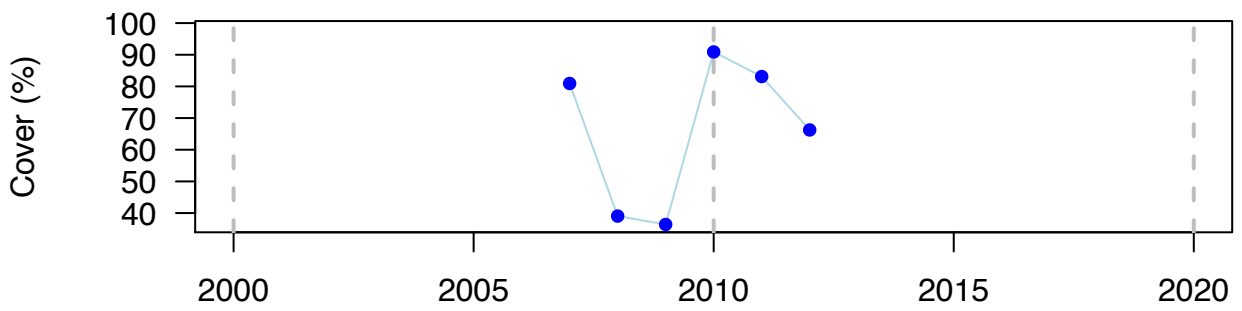

276\_area

Wilkes et al. 2017

SITE: Garavoge Estuary (Ireland – Atlantic) – Zn (? m)

OVERALL: Net = 1.08 ha; Rate = 3.69 % yr<sup>-1</sup>; Perc Final = 120 % > increase

DECADAL: NO (5 yr)

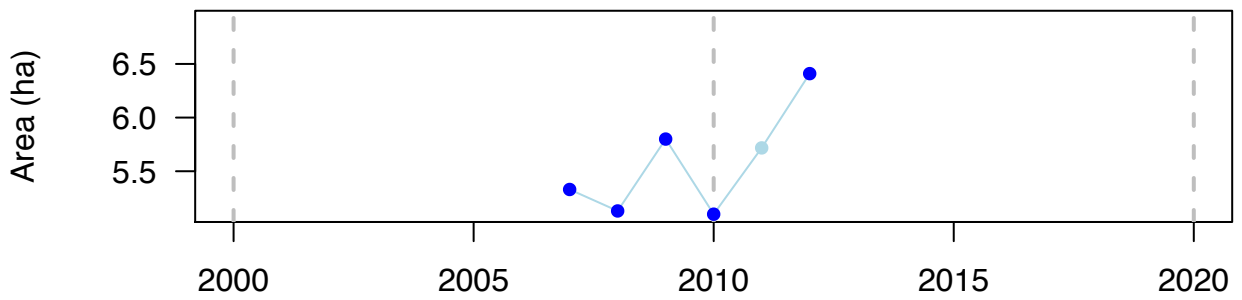



276\_cover

Wilkes et al. 2017

SITE: Garavoge Estuary (Ireland – Atlantic) – Zn (? m)

OVERALL: Net = -16.76 %; Rate = -5.61 % yr<sup>-1</sup>; Perc Final = 76 % > no change

DECADAL: NO (5 yr)

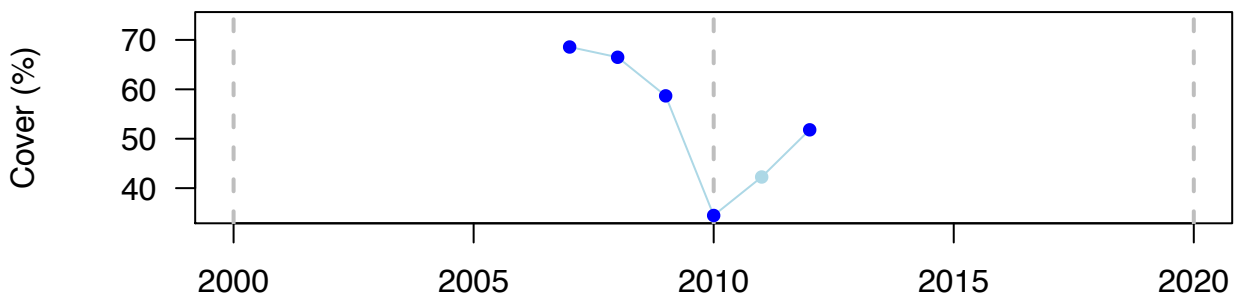

277\_area

Wilkes et al. 2017

SITE: Malahide Bay (Ireland – Atlantic) – Zn (? m)

OVERALL: Net = 0.03 ha; Rate = 0.29 % yr<sup>-1</sup>; Perc Final = 101 % > no change

DECADAL: NO (3 yr)

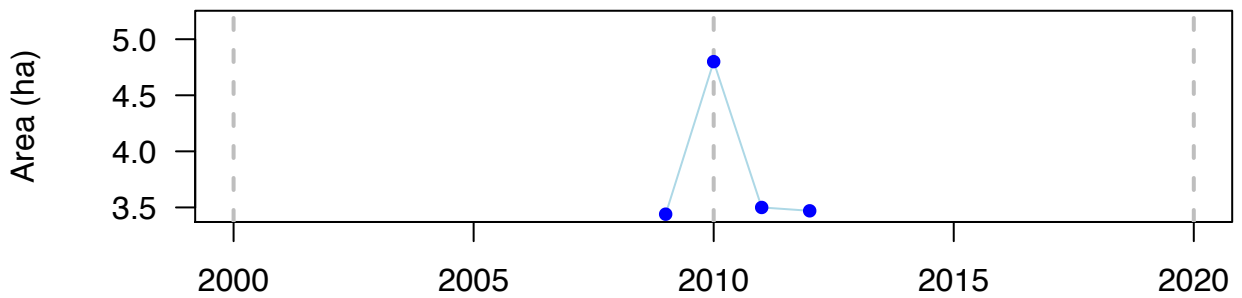

277\_cover

Wilkes et al. 2017

SITE: Malahide Bay (Ireland – Atlantic) – Zn (? m)

OVERALL: Net = -2.92 %; Rate = -1.58 % yr<sup>-1</sup>; Perc Final = 95 % > no change

DECADAL: NO (3 yr)

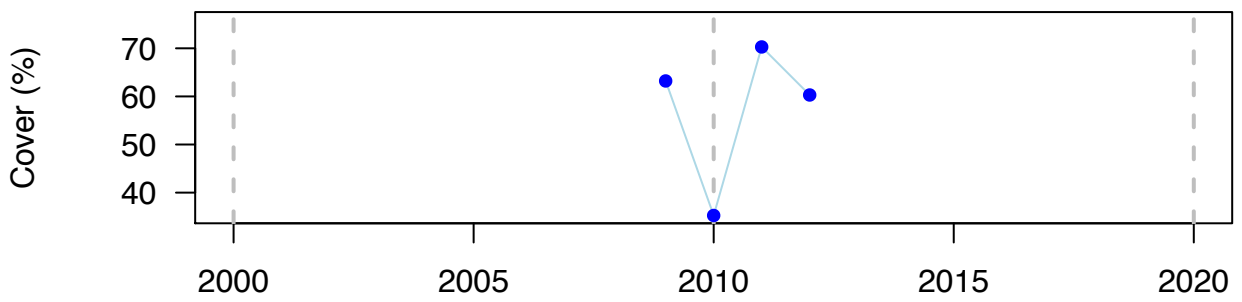

278\_area

Wilkes et al. 2017

SITE: Moy Estuary (Ireland – Atlantic) – Zn (? m)

OVERALL: Net = 1.67 ha; Rate = 2.41 % yr<sup>-1</sup>; Perc Final = 108 % > no change

DECADAL: NO (3 yr)

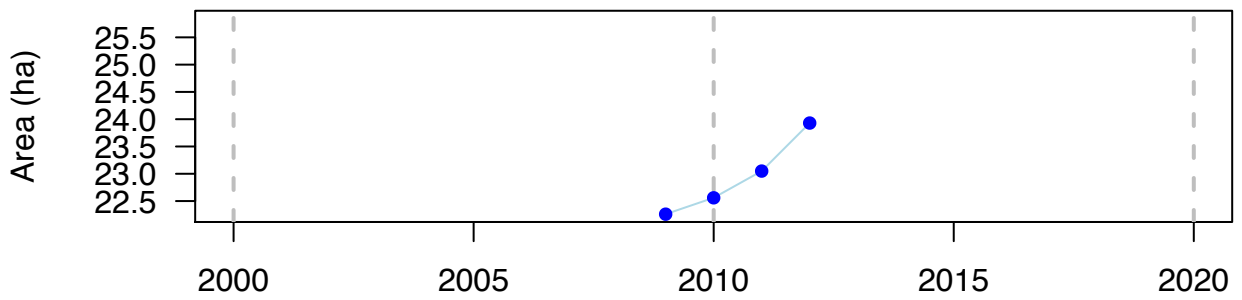

278\_cover

Wilkes et al. 2017

SITE: Moy Estuary (Ireland – Atlantic) – Zn (? m)

OVERALL: Net = -21.86 %; Rate = -20.3 % yr<sup>-1</sup>; Perc Final = 54 % > decrease

DECADAL: NO (3 yr)

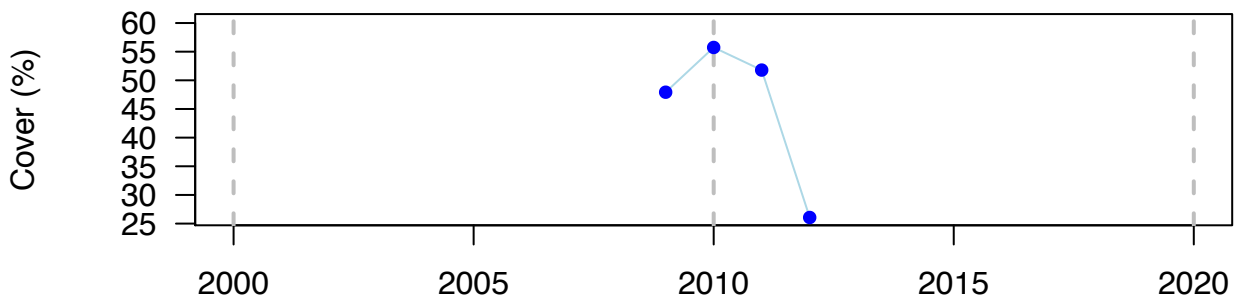

279\_area

Wilkes et al. 2017

SITE: Tramore Back Strand (Ireland – Atlantic) – Zn (? m)

OVERALL: Net = 2.59 ha; Rate = 9.36 % yr<sup>-1</sup>; Perc Final = 145 % > increase

DECADAL: NO (4 yr)

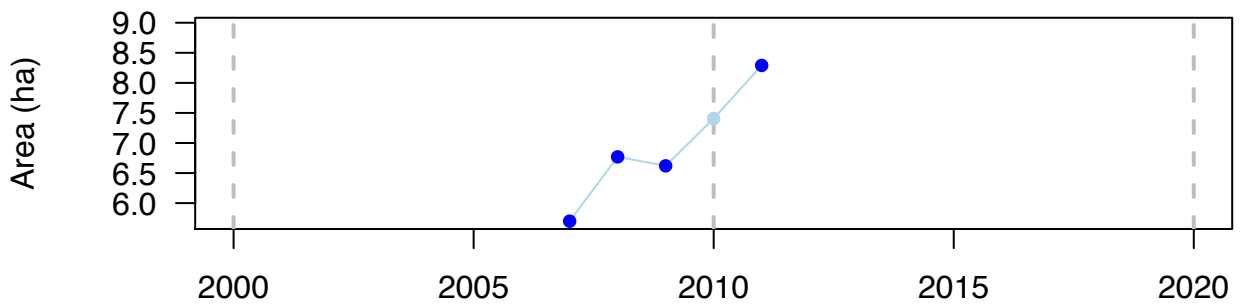

279\_cover

Wilkes et al. 2017

SITE: Tramore Back Strand (Ireland – Atlantic) – Zn (? m)

OVERALL: Net = 28.73 %; Rate = 12.2 % yr<sup>-1</sup>; Perc Final = 163 % > increase

DECADAL: NO (4 yr)

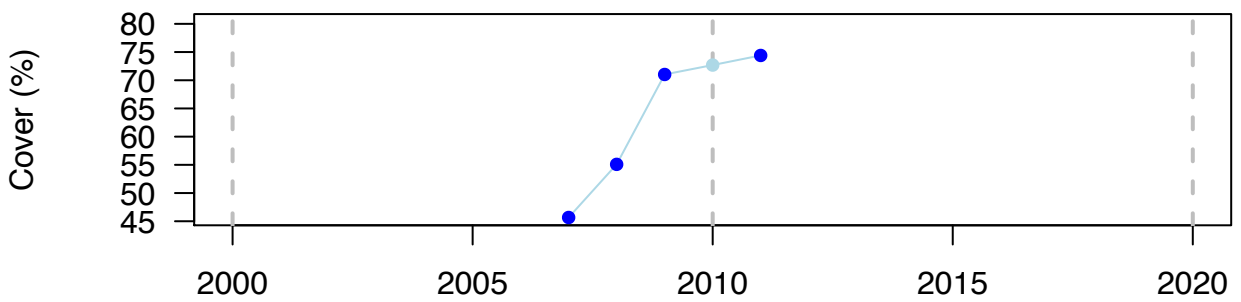

280\_lowerlimit

Carstensen and Krause-Jensen 2012

SITE: Aabenraa Fjord (Denmark – Baltic) – Zm (? m)

OVERALL: Net = -0.71 m; Rate = -0.78 % yr<sup>-1</sup>; Perc Final = 84 % > decrease

DECADAL: YES (22 yr)

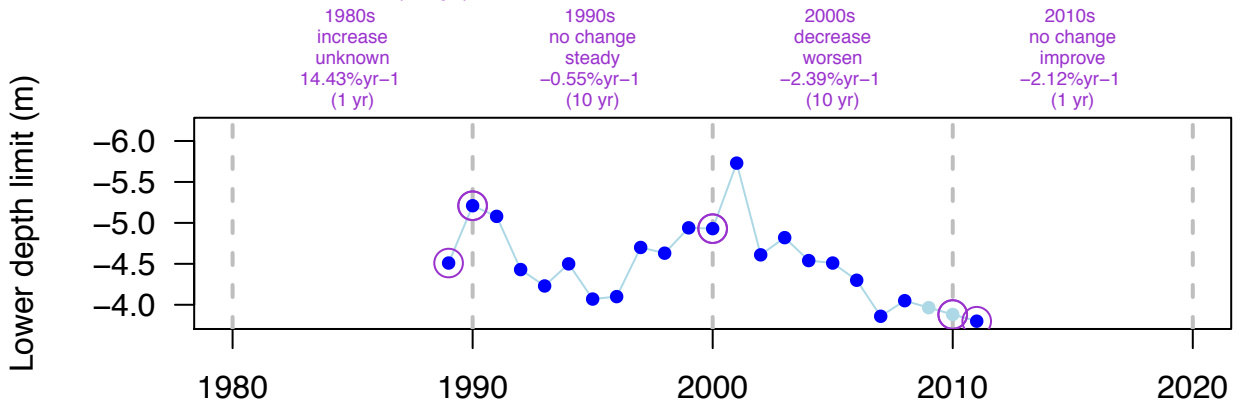

281\_lowerlimit

Carstensen and Krause-Jensen 2012

SITE: Als Sund (Denmark – Baltic) – Zm (? m)

OVERALL: Net = -0.69 m; Rate = -1.04 % yr<sup>-1</sup>; Perc Final = 80 % > decrease

DECADAL: YES (22 yr)

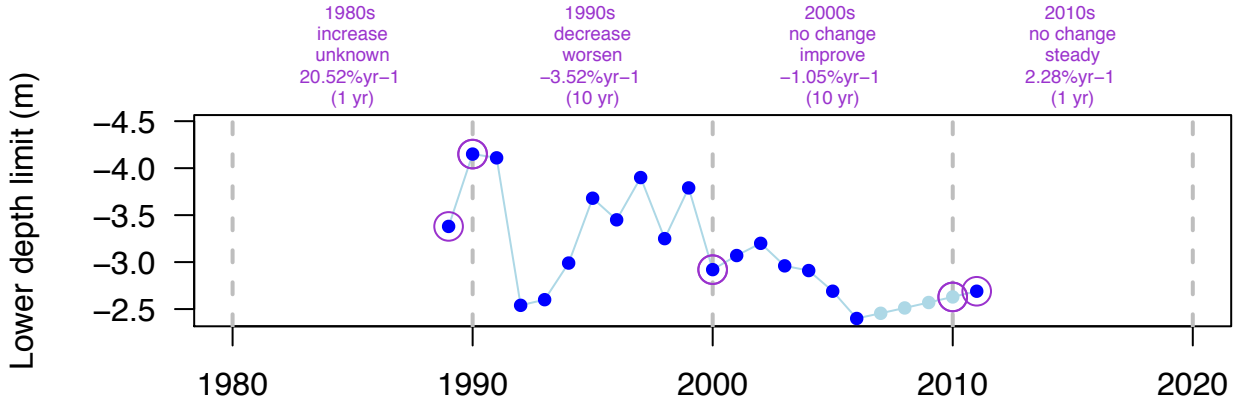

282\_lowerlimit

Krause-Jensen and Rasmussen 2009, Carstensen and Krause-Jensen 2012

SITE: Århus Bugt (Denmark – Baltic) – Zm (? m)

OVERALL: Net = -4.87 m; Rate = -0.6 % yr<sup>-1</sup>; Perc Final = 49 % > decrease

DECADAL: YES (120 yr)

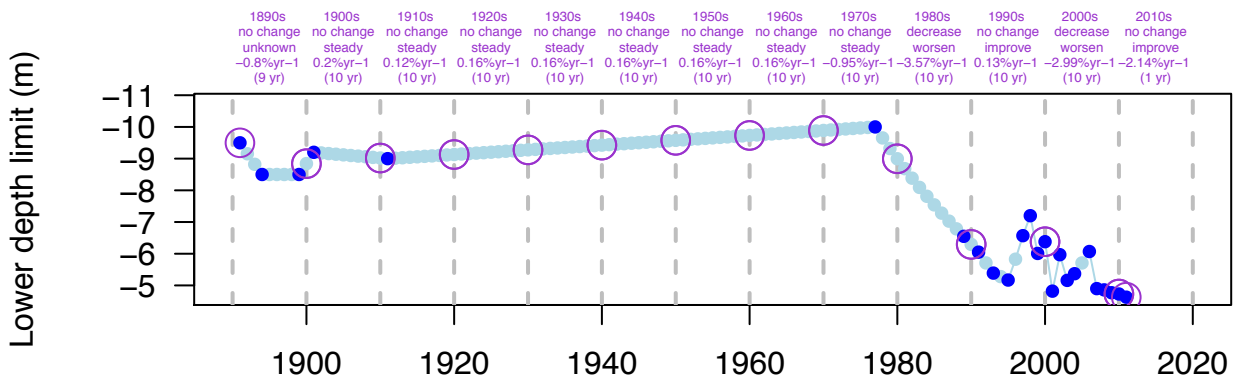

283\_area

Vinther (unpublished)

SITE: Flensborg Fjord (Brunsnæs) (Denmark – Baltic) – Zm (? m)

OVERALL: Net = 21.77 ha; Rate = 3.33 % yr<sup>-1</sup>; Perc Final = 762 % > increase

DECADAL: YES (61 yr)

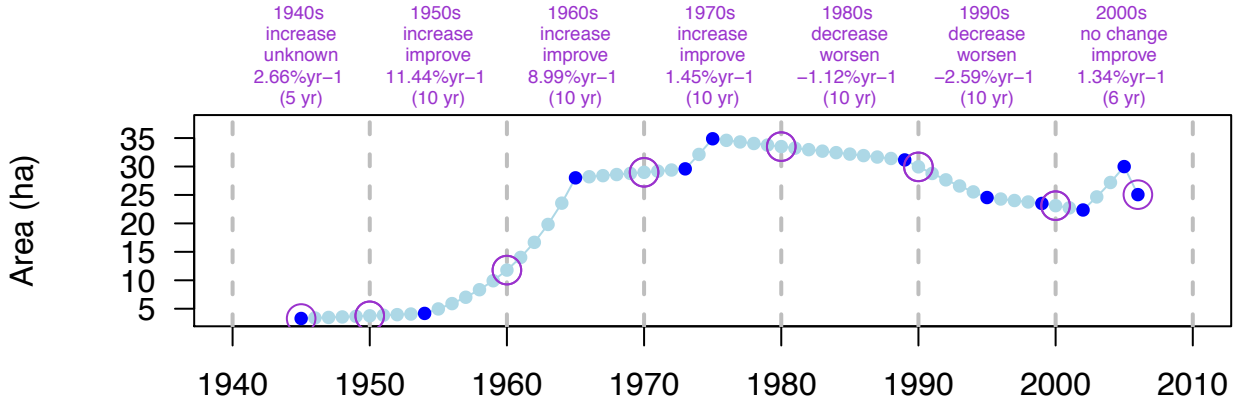

284\_lowerlimit

Carstensen and Krause-Jensen 2012

SITE: Det Sydfynske Øhav (Denmark – Baltic) – Zm (? m)

OVERALL: Net = -1.5 m; Rate = -0.18 % yr<sup>-1</sup>; Perc Final = 80 % > decrease

DECADAL: YES (121 yr)

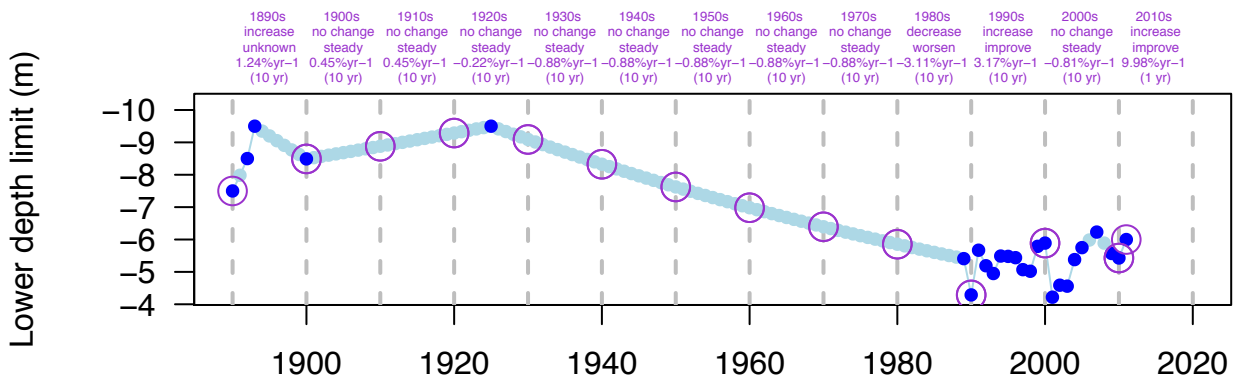



287\_lowerlimit

Krause-Jensen and Rasmussen 2009, Carstensen and Krause-Jensen 2012

SITE: Isefjord (Inderbredning) (Denmark – Baltic) – Zm (? m)

OVERALL: Net = -1.38 m; Rate = -0.37 % yr<sup>-1</sup>; Perc Final = 64 % > decrease

DECADAL: YES (121 yr)

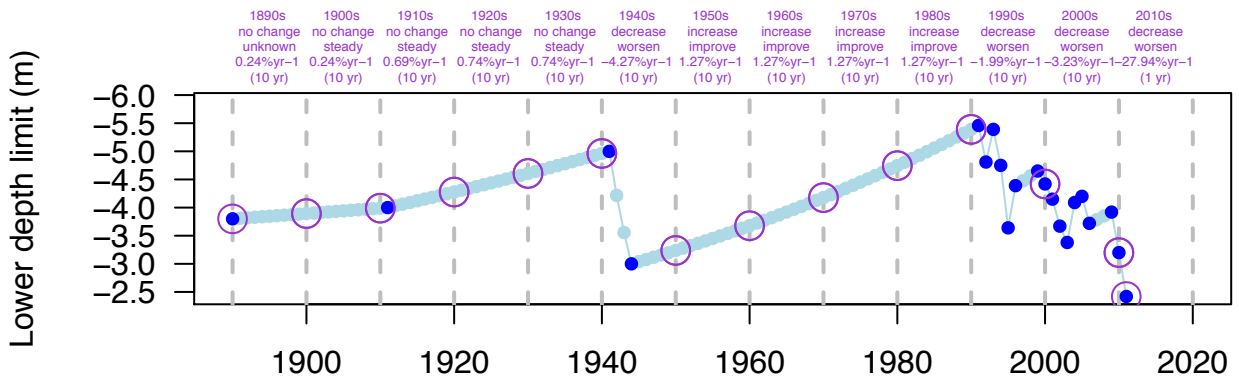

288\_lowerlimit

Carstensen and Krause-Jensen 2012

SITE: Isefjord (Inderbredning) (Denmark – Baltic) – Zm (? m)

OVERALL: Net = -5.88 m; Rate = -0.65 % yr<sup>-1</sup>; Perc Final = 47 % > decrease

DECADAL: YES (118 yr)

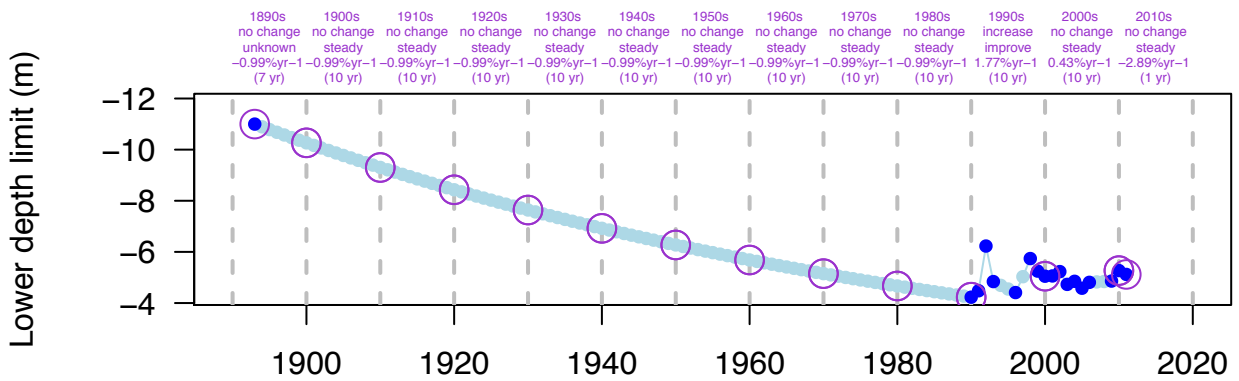



289\_lowerlimit

Carstensen and Krause-Jensen 2012

SITE: Køge Bugt (Denmark – Baltic) – Zm (? m)

OVERALL: Net = -2.08 m; Rate = -0.21 % yr<sup>-1</sup>; Perc Final = 78 % > decrease

DECADAL: YES (117 yr)

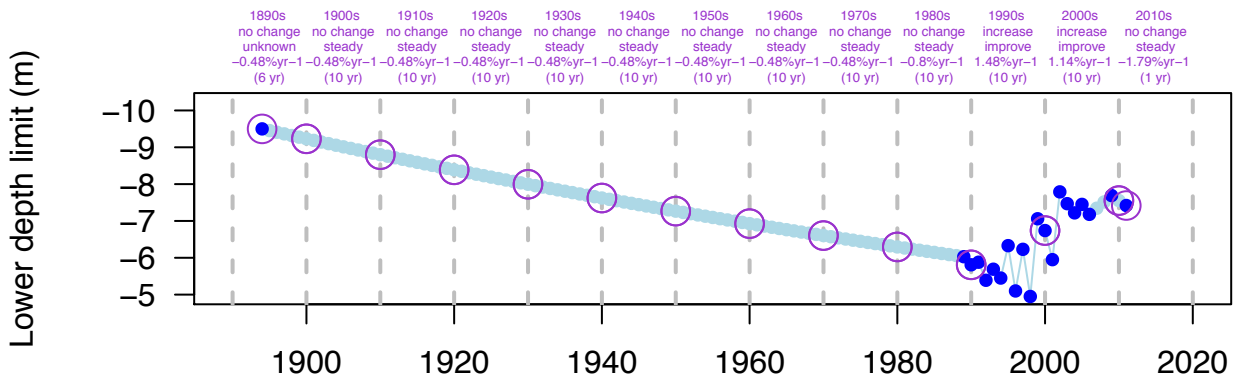

290\_lowerlimit

Carstensen and Krause-Jensen 2012

SITE: Kolding Fjord (Denmark – Baltic) – Zm (? m)

OVERALL: Net = -4.22 m; Rate = -0.85 % yr<sup>-1</sup>; Perc Final = 36 % > decrease

DECADAL: YES (120 yr)

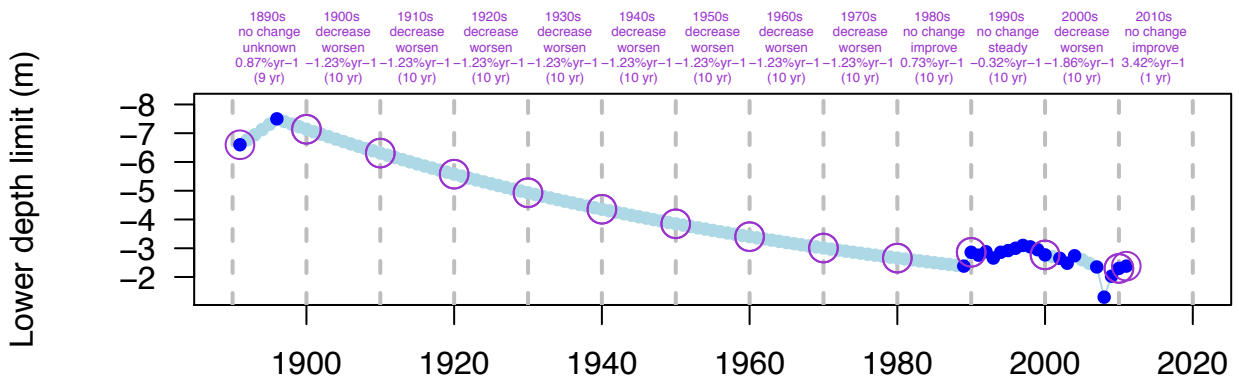

291\_area

Frederiksen et al. 2004

SITE: Limfjorden (Boddum Vig) (Denmark – Baltic) – Zm (? m)

OVERALL: Net = 13.5 ha; Rate = 3.87 % yr<sup>-1</sup>; Perc Final = 550 % > increase

DECADAL: YES (44 yr)

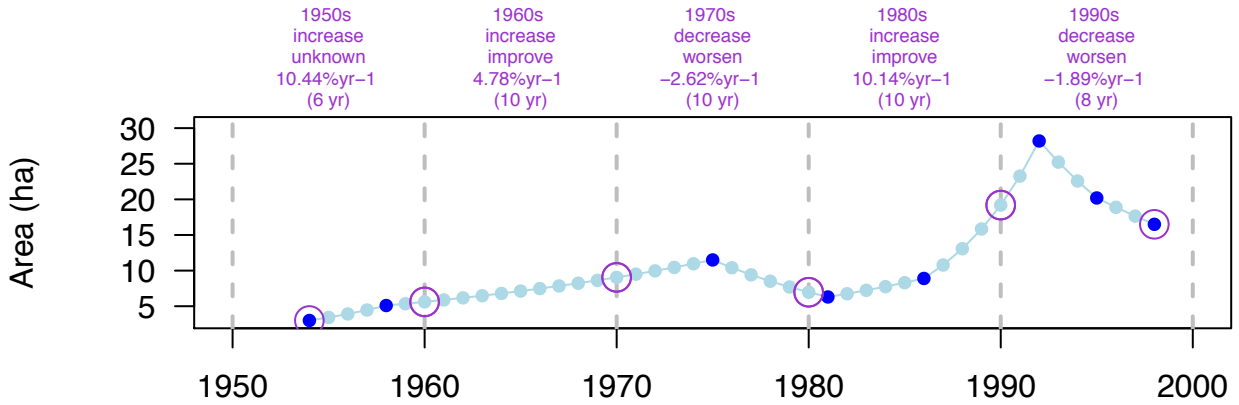

292\_area

Frederiksen et al. 2004

SITE: Limfjorden (Holmstange) (Denmark – Baltic) – Zm (? m)

OVERALL: Net = 16 ha; Rate = 7.43 % yr<sup>-1</sup>; Perc Final = 4100 % > increase

DECADAL: YES (50 yr)

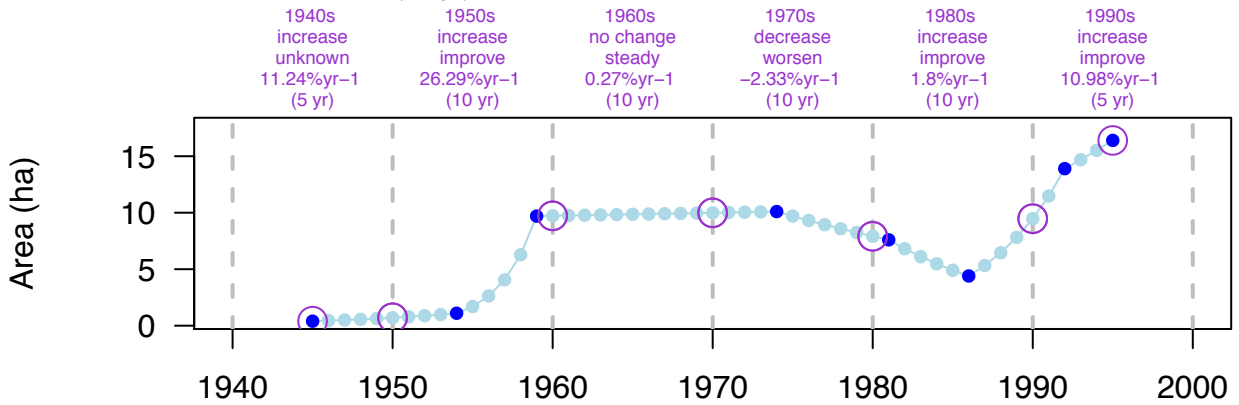

293\_lowerlimit

Krause-Jensen and Rasmussen 2009, Carstensen and Krause-Jensen 2012

SITE: Løgstør Bredning (Denmark – Baltic) – Zm (? m)

OVERALL: Net = -2.55 m; Rate = -0.54 % yr<sup>-1</sup>; Perc Final = 53 % > decrease

DECADAL: YES (118 yr)

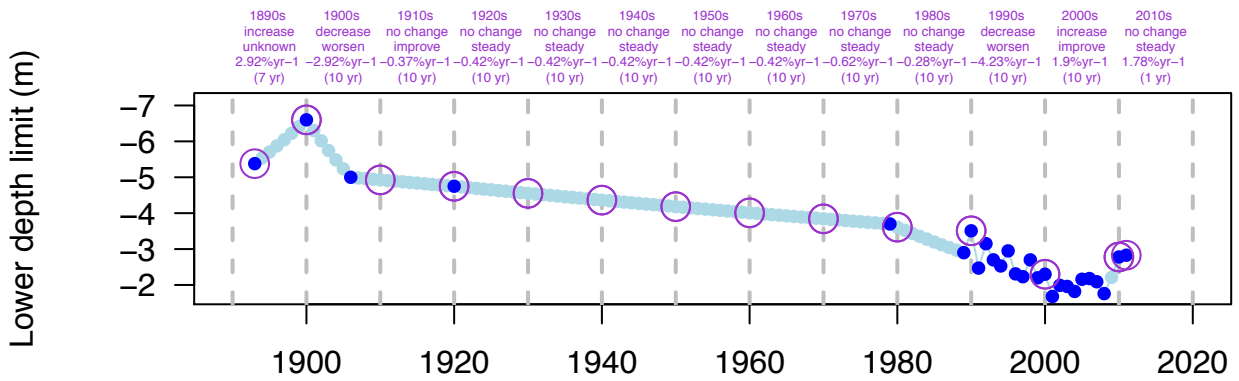

294\_area

Laursen (unpublished)

SITE: Mariager Fjord (Denmark – Baltic) – Zm (? m)

OVERALL: Net = 198.7 ha; Rate = 2.3 % yr<sup>-1</sup>; Perc Final = 186 % > increase

DECADAL: YES (27 yr)

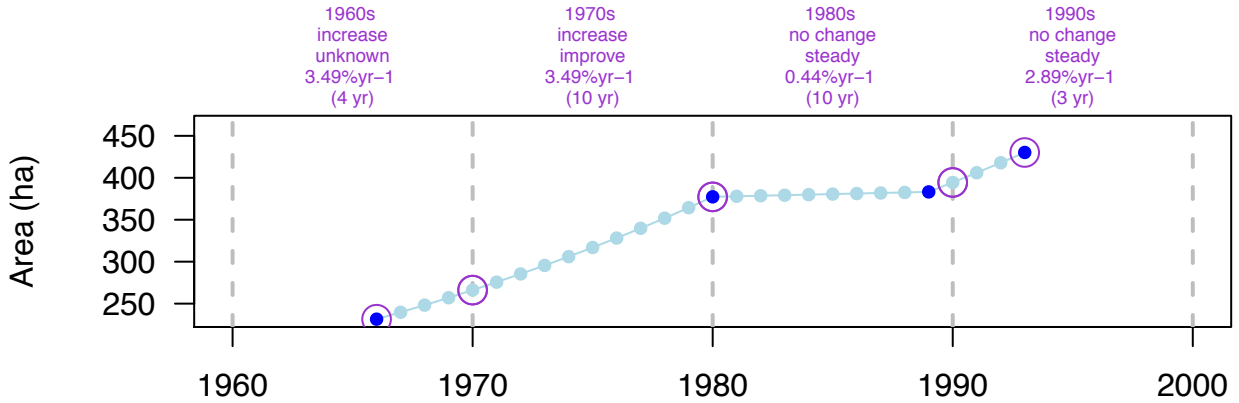

295\_lowerlimit

Krause-Jensen and Rasmussen 2009, Carstensen and Krause-Jensen 2012

SITE: Nibe Gjøl Bredning (Denmark – Baltic) – Zm (? m)

OVERALL: Net = -2.06 m; Rate = -0.52 % yr<sup>-1</sup>; Perc Final = 56 % > decrease

DECADAL: YES (111 yr)

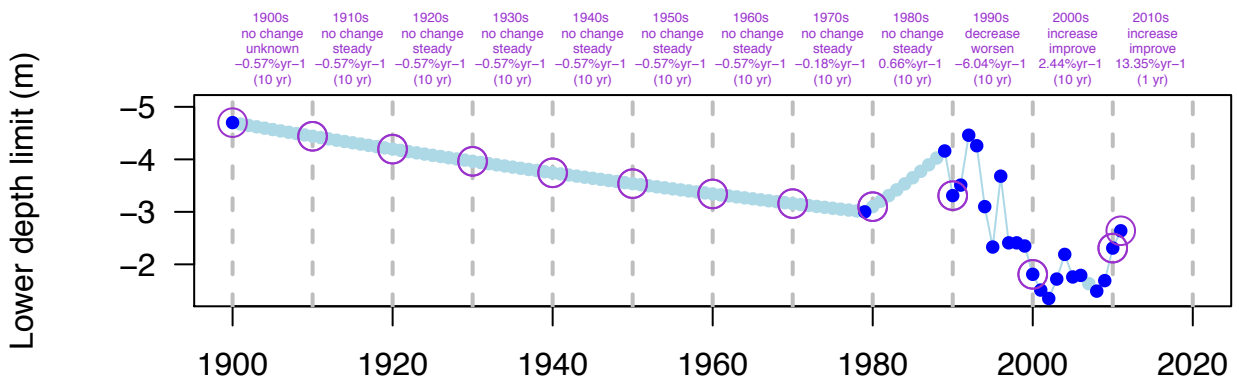

296\_area

Josefson et al. 2009, Carstensen and Krause-Jensen 2012

SITE: Odense Fjord (Denmark – Baltic) – Zm (? m)

OVERALL: Net = -2490 ha; Rate = -2.67 % yr<sup>-1</sup>; Perc Final = 6 % > decrease

DECADAL: YES (105 yr)

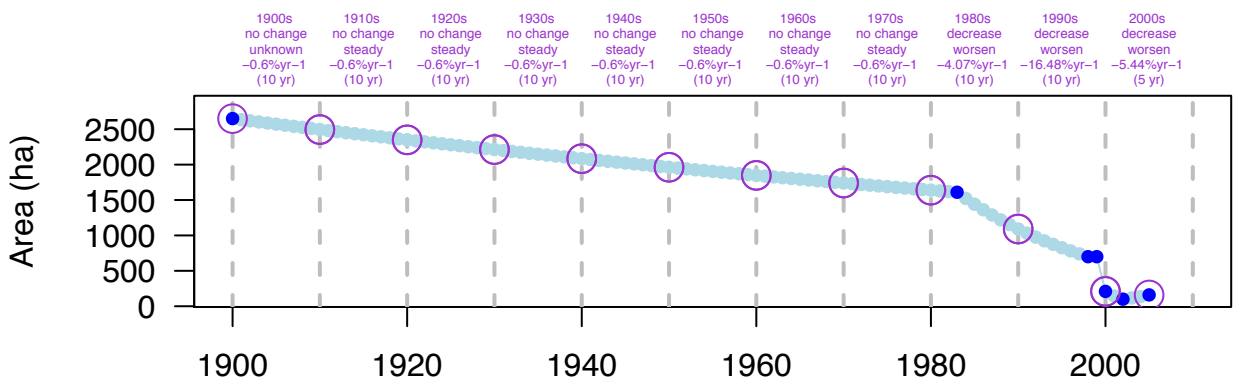

296\_lowerlimit

Josefson et al. 2009, Carstensen and Krause-Jensen 2012

SITE: Odense Fjord (Denmark – Baltic) – Zm (? m)

OVERALL: Net = -3.51 m; Rate = -0.89 % yr<sup>-1</sup>; Perc Final = 37 % > decrease

DECADAL: YES (111 yr)

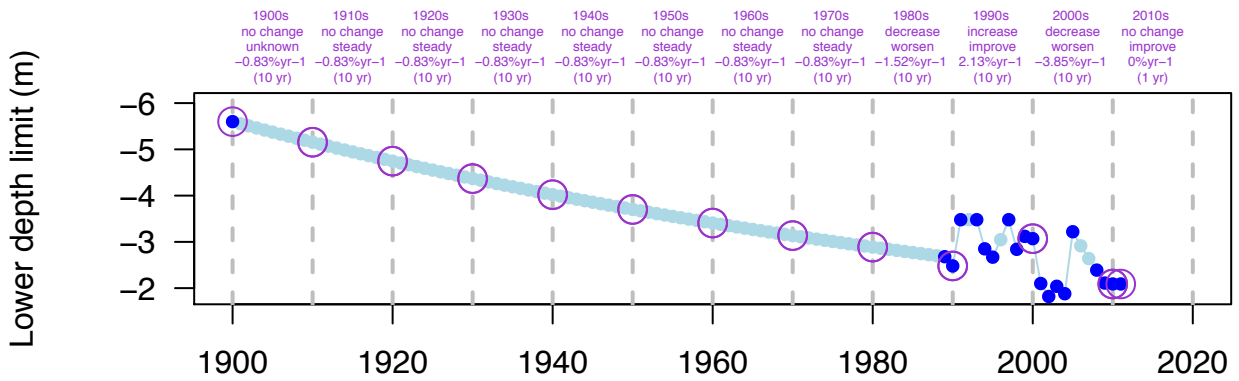

297\_lowerlimit

Krause-Jensen and Rasmussen 2009, Carstensen and Krause-Jensen 2012

SITE: Øresund (entire) (Denmark – Baltic) – Zm (? m)

OVERALL: Net = -1.47 m; Rate = -0.17 % yr<sup>-1</sup>; Perc Final = 82 % > decrease

DECADAL: YES (117 yr)

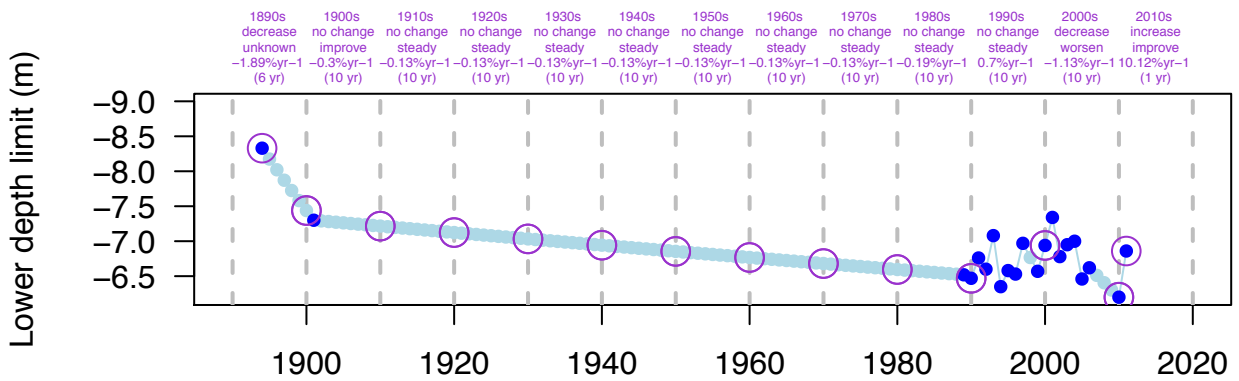

298\_area

Frederiksen et al. 2004

SITE: Øresund (Amager) (Denmark – Baltic) – Zm (? m)

OVERALL: Net = -44.7 ha; Rate = -0.95 % yr<sup>-1</sup>; Perc Final = 68 % > decrease

DECADAL: YES (41 yr)

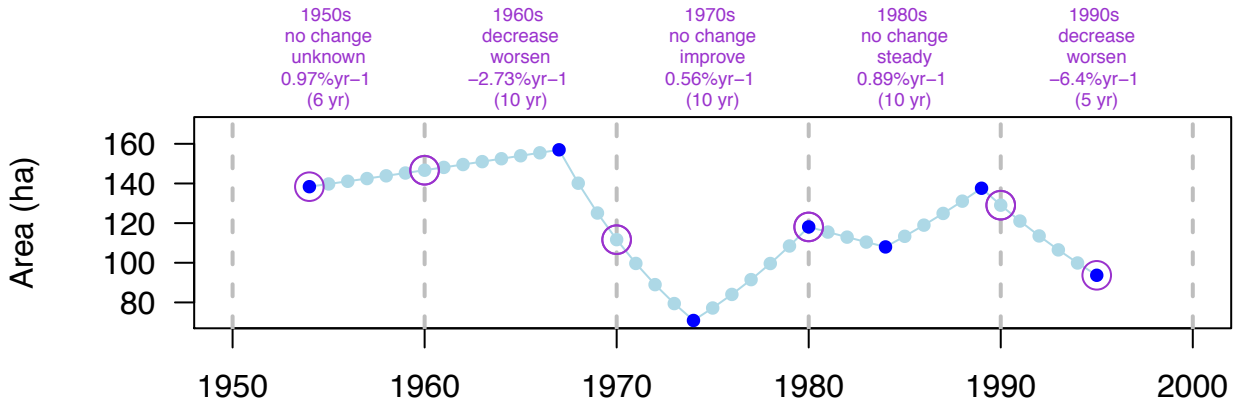

299\_abiomass

Krause-Jensen et al. 2000

SITE: Saltholm (control) (Denmark – Baltic) – Zm (? m)

OVERALL: Net = 4 g dw m<sup>-2</sup>; Rate = 0.78 % yr<sup>-1</sup>; Perc Final = 106 % > no change

DECADAL: NO (7 yr)

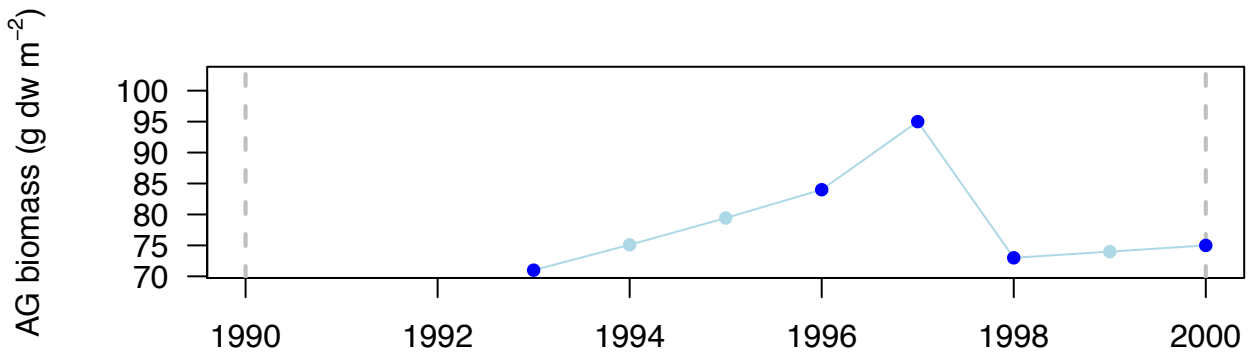

299\_density

Krause-Jensen et al. 2000

SITE: Saltholm (control) (Denmark – Baltic) – Zm (? m)

OVERALL: Net = 119 shoot m<sup>-2</sup>; Rate = 5.44 % yr<sup>-1</sup>; Perc Final = 146 % > increase

DECADAL: NO (7 yr)

Shoot density (shoot m<sup>-2</sup>)

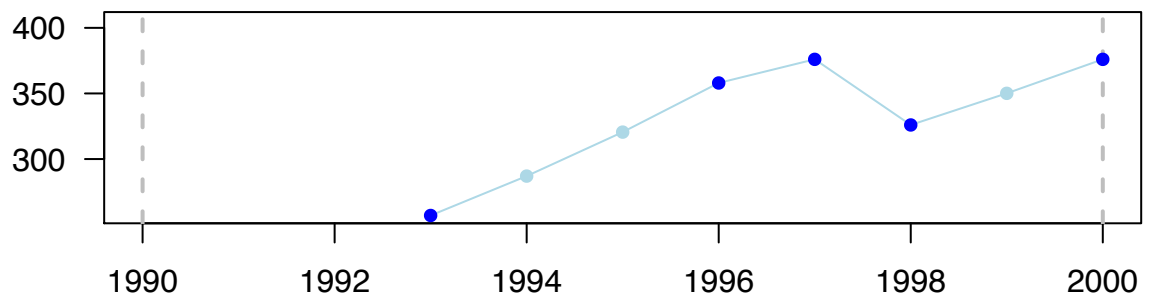

300\_abiomass

Krause-Jensen et al. 2000

SITE: Saltholm (impacted) (Denmark – Baltic) – Zm (? m)

OVERALL: Net = 0 g dw m<sup>-2</sup>; Rate = 0 % yr<sup>-1</sup>; Perc Final = 100 % > no change

DECADAL: NO (7 yr)

AG biomass (g dw m<sup>-2</sup>)

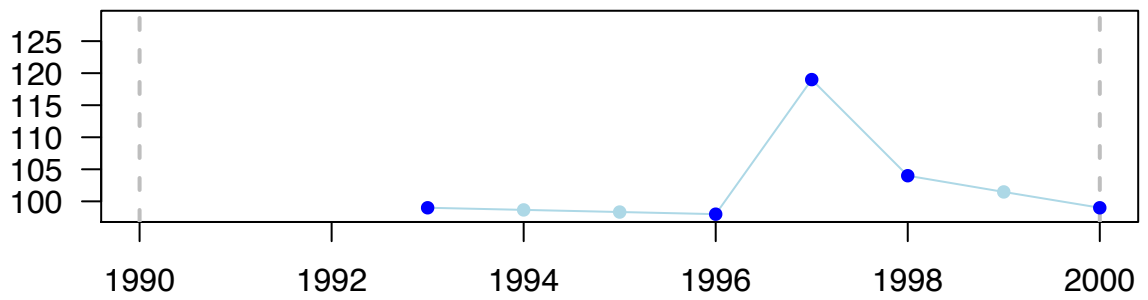

300\_density

Krause-Jensen et al. 2000

SITE: Saltholm (impacted) (Denmark – Baltic) – Zm (? m)

OVERALL: Net = 224 shoot m<sup>-2</sup>; Rate = 7.42 % yr<sup>-1</sup>; Perc Final = 168 % > increase

DECADAL: NO (7 yr)

Shoot density (shoot m<sup>-2</sup>)

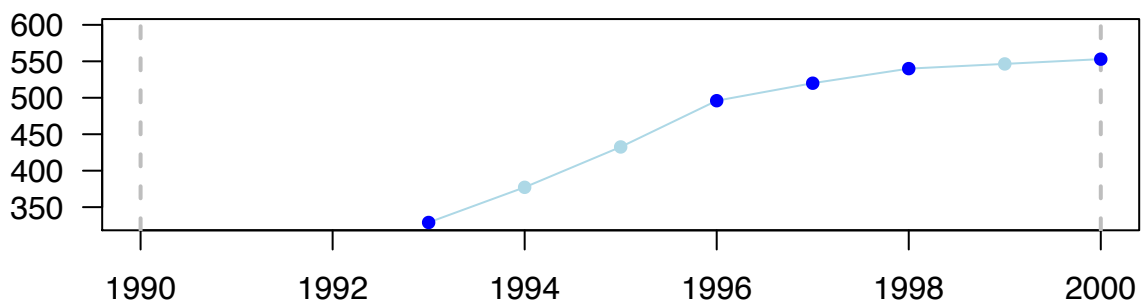

301\_lowerlimit

Krause-Jensen and Rasmussen 2009, Carstensen and Krause-Jensen 2012

SITE: Præstø Fjord (Denmark – Baltic) – Zm (? m)

OVERALL: Net = -1.87 m; Rate = -0.62 % yr<sup>-1</sup>; Perc Final = 66 % > decrease

DECADAL: YES (67 yr)

| Decade | Change    | Rate    | Period                         |
|--------|-----------|---------|--------------------------------|
| 1940s  | no change | unknown | (7 yr)                         |
| 1950s  | decrease  | worsen  | -1.2%yr <sup>-1</sup> (10 yr)  |
| 1960s  | decrease  | worsen  | -1.2%yr <sup>-1</sup> (10 yr)  |
| 1970s  | decrease  | worsen  | -1.2%yr <sup>-1</sup> (10 yr)  |
| 1980s  | no change | improve | -0.56%yr <sup>-1</sup> (10 yr) |
| 1990s  | increase  | improve | 1.8%yr <sup>-1</sup> (10 yr)   |
| 2000s  | no change | steady  | -0.93%yr <sup>-1</sup> (10 yr) |

Lower depth limit (m)

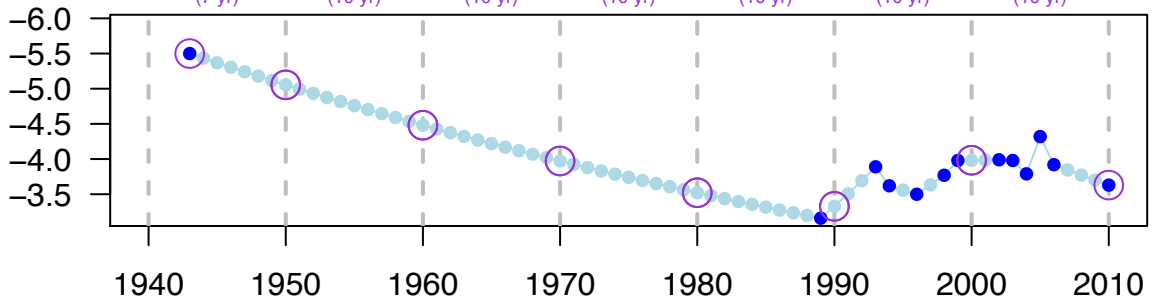



302\_lowerlimit

Carstensen and Krause-Jensen 2012

SITE: Roskilde Fjord (Denmark – Baltic) – Zm (? m)

OVERALL: Net = -4.64 m; Rate = -0.82 % yr<sup>-1</sup>; Perc Final = 38 % > decrease

DECADAL: YES (118 yr)

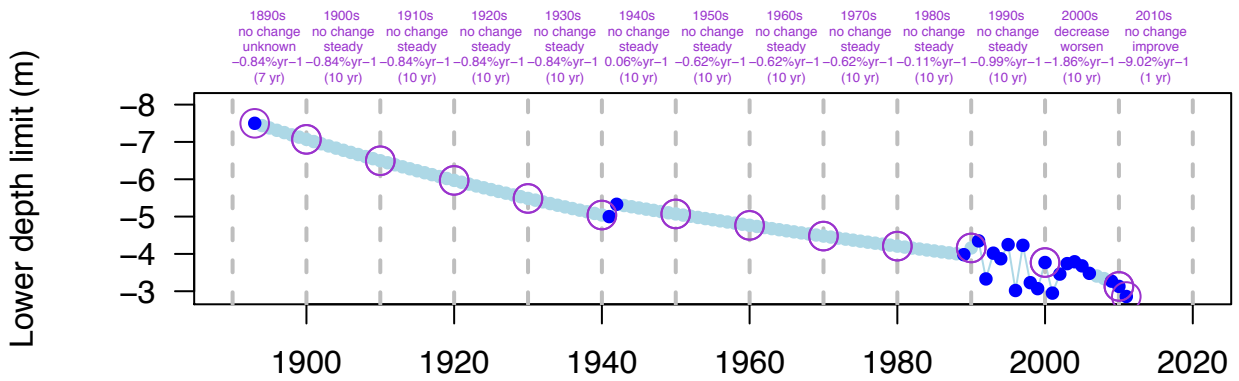

303\_area

Frederiksen et al. 2004

SITE: Samsø (Stavns Fjord) (Denmark – Baltic) – Zm (? m)

OVERALL: Net = -60.5 ha; Rate = -1.18 % yr<sup>-1</sup>; Perc Final = 59 % > decrease

DECADAL: YES (45 yr)

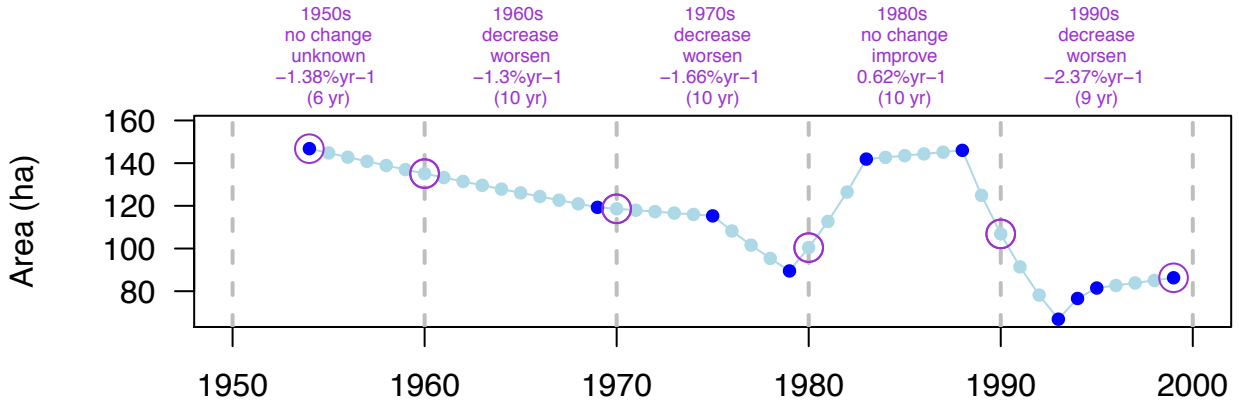



306\_lowerlimit

Carstensen and Krause-Jensen 2012

SITE: Vejle Fjord (Denmark – Baltic) – Zm (? m)

OVERALL: Net = -3.62 m; Rate = -0.9 % yr<sup>-1</sup>; Perc Final = 34 % > decrease

DECADAL: YES (119 yr)

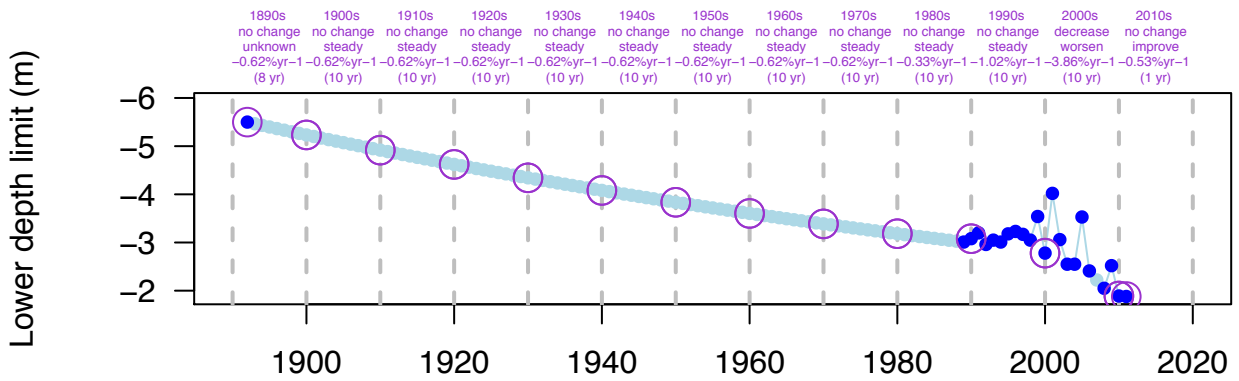

307\_area

Frederiksen et al. 2004

SITE: Vejle Fjord (outer) (Denmark – Baltic) – Zm (? m)

OVERALL: Net = 3.6 ha; Rate = 2.95 % yr<sup>-1</sup>; Perc Final = 377 % > increase

DECADAL: YES (45 yr)

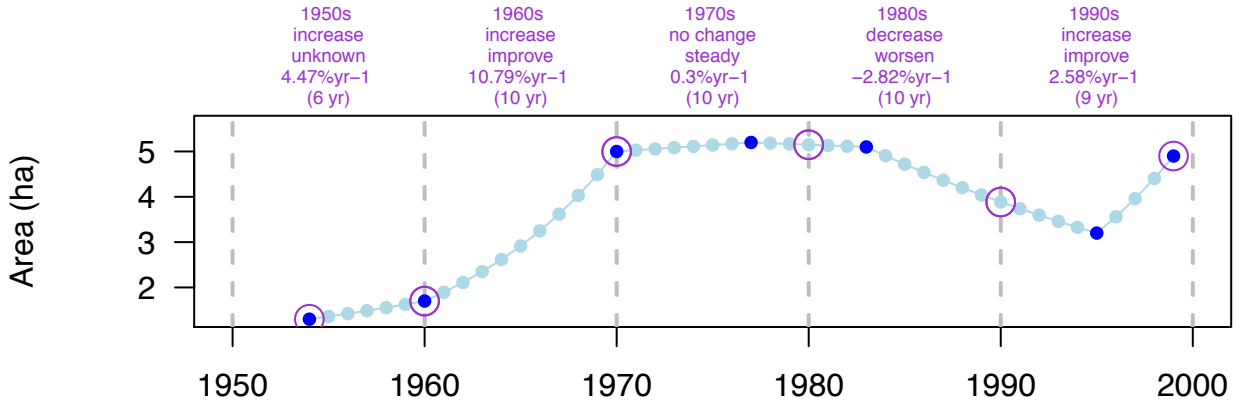

308\_lowerlimit

Carstensen and Krause-Jensen 2012

SITE: Isefjord (Yderbredning) (Denmark – Baltic) – Zm (? m)

OVERALL: Net = 0.63 m; Rate = 0.12 % yr<sup>-1</sup>; Perc Final = 116 % > increase

DECADAL: YES (118 yr)

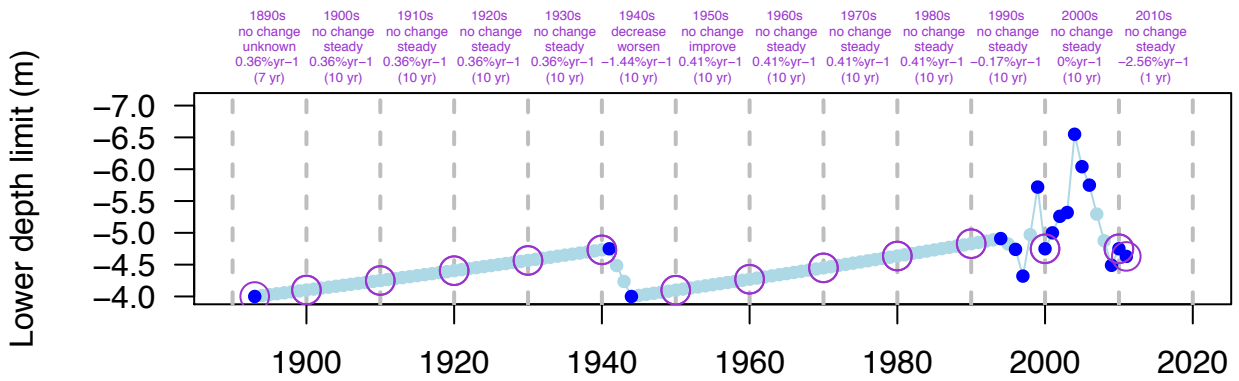

309\_area

van der Graaf et al. 2009, Vinther (unpublished), Dolch et al. 2017

SITE: Grådyb (Denmark – Atlantic) – Zm (-0.2 m)

OVERALL: Net = -222.818 ha; Rate = -3.45 % yr<sup>-1</sup>; Perc Final = 17 % > decrease

DECADAL: YES (51 yr)

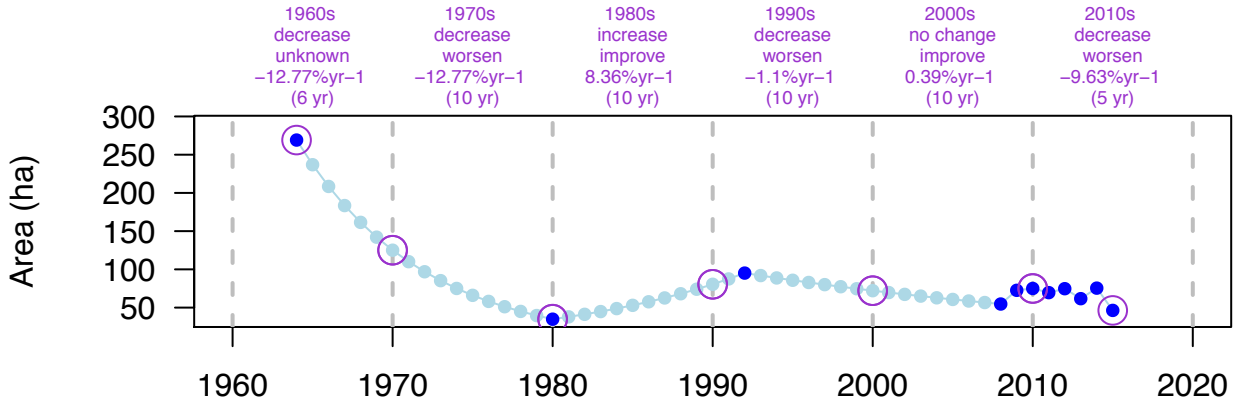

310\_area

van der Graaf et al. 2009, Vinther (unpublished), Dolch et al. 2017

SITE: Juvre Dyb (Denmark – Atlantic) – Zm (0 m)

OVERALL: Net = -106.604 ha; Rate = -0.4 % yr<sup>-1</sup>; Perc Final = 75 % > decrease

DECADAL: YES (70 yr)

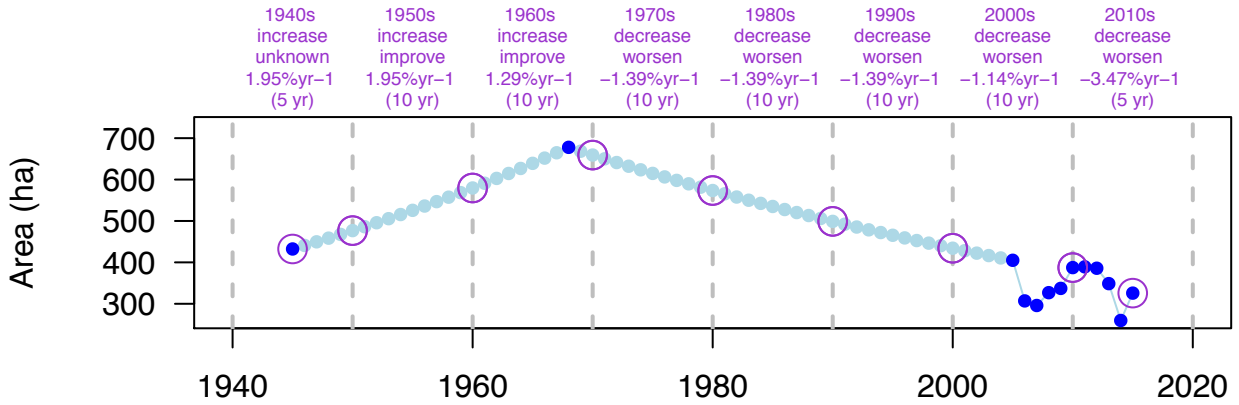

311\_area

van der Graaf et al. 2009, Vinther (unpublished), Dolch et al. 2017

SITE: Knude Dyb (Denmark – Atlantic) – Zm (-0.2 m)

OVERALL: Net = -366.826 ha; Rate = -9.13 % yr<sup>-1</sup>; Perc Final = 1 % > decrease

DECADAL: YES (51 yr)

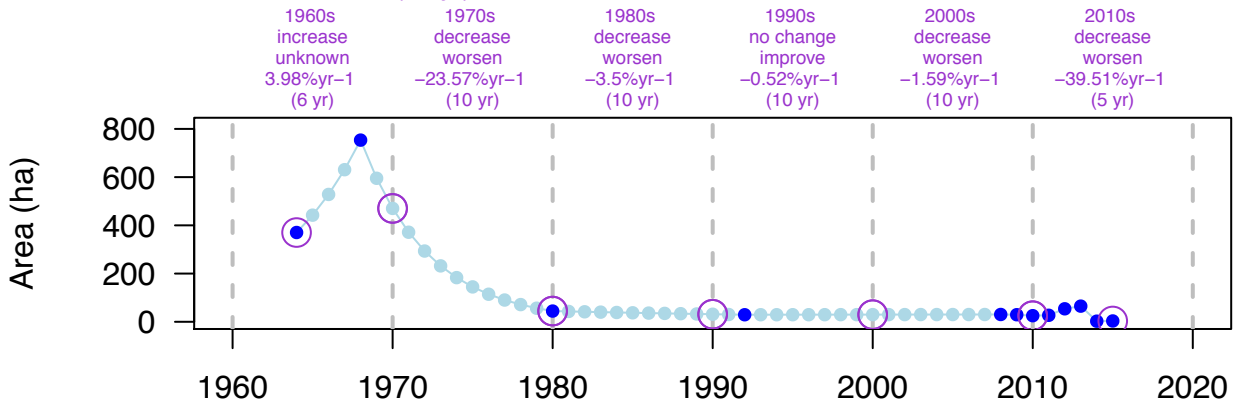

312\_area

van der Graaf et al. 2009, Vinther (unpublished), Dolch et al. 2017

SITE: Lister Dyb (Denmark – Atlantic) – Zm (–0.2 m)

OVERALL: Net = –288.493 ha; Rate = –0.92 % yr<sup>-1</sup>; Perc Final = 52 % > decrease

DECADAL: YES (70 yr)

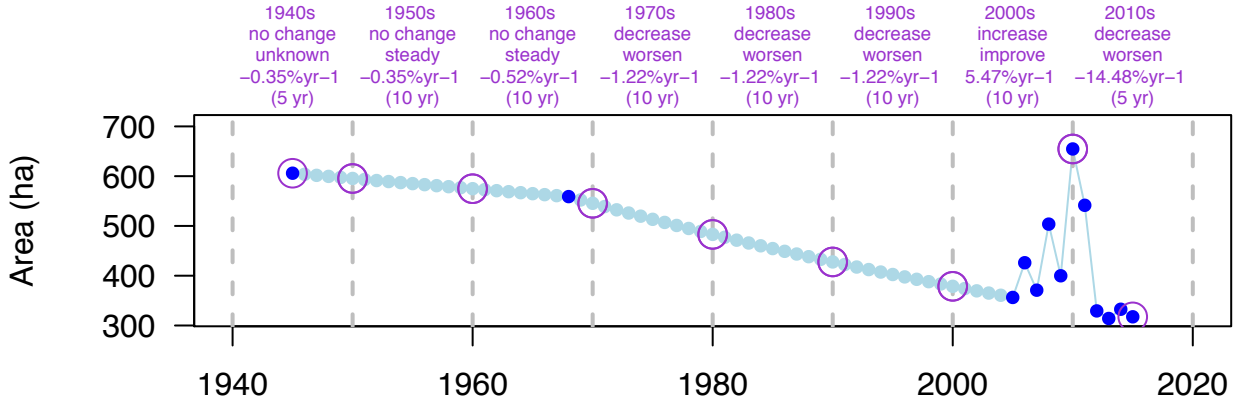

314\_lowerlimit

Bernard et al. 2007

SITE: Berre Lagoon (France – Mediterranean) – Zm (? m)

OVERALL: Net = –5.5 m; Rate = –2.54 % yr<sup>-1</sup>; Perc Final = 8 % > decrease

DECADAL: YES (98 yr)

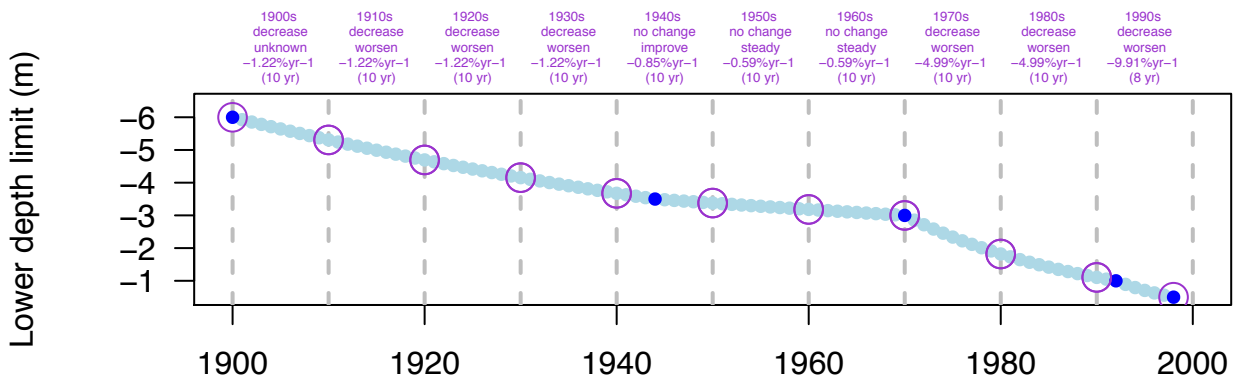

315\_area

Bernard et al. 2007

SITE: Berre Lagoon (Figuerolles) (France – Mediterranean) – Zm (? m)

OVERALL: Net = -22.41 ha; Rate = -11.7 % yr<sup>-1</sup>; Perc Final = 0 % > decrease

DECADAL: YES (60 yr)

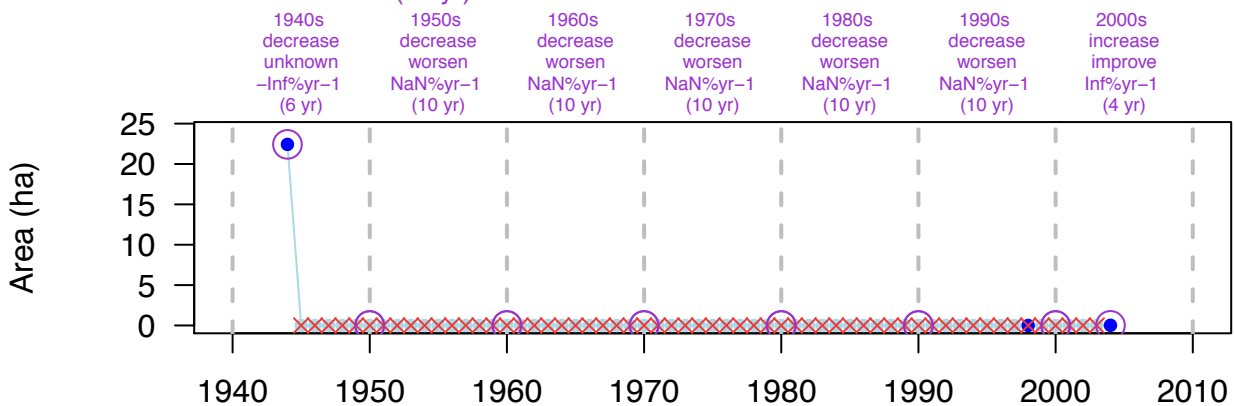

316\_area

Bernard et al. 2007

SITE: Berre Lagoon (Martigues) (France – Mediterranean) – Zm (? m)

OVERALL: Net = -13.57 ha; Rate = -10.87 % yr<sup>-1</sup>; Perc Final = 0 % > decrease

DECADAL: YES (60 yr)

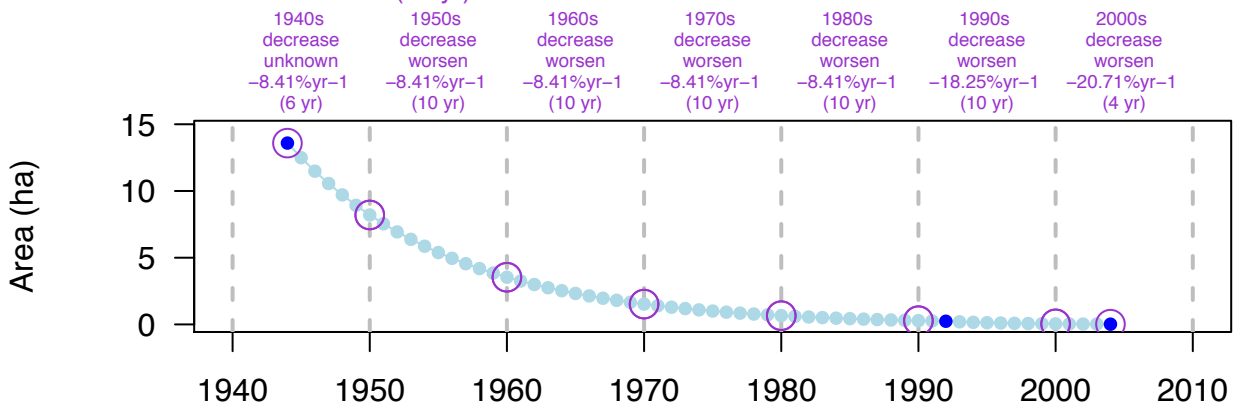

317\_area

Bernard et al. 2007

SITE: Berre Lagoon (Pointe de Berre) (France – Mediterranean) – Zm (? m)

OVERALL: Net = -83.36 ha; Rate = -7.74 % yr<sup>-1</sup>; Perc Final = 1 % > decrease

DECADAL: YES (60 yr)

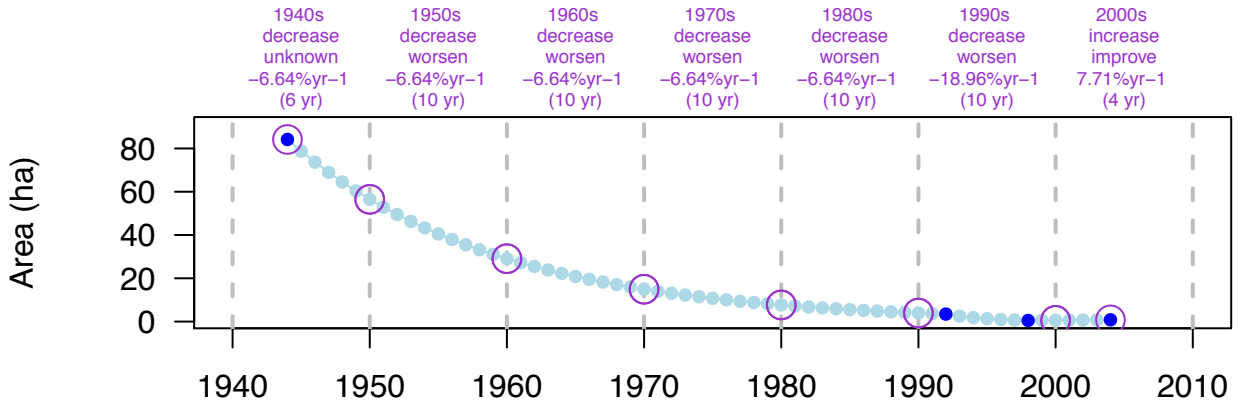

318\_area

Bernard et al. 2007

SITE: Berre Lagoon (Pointe de l'Arc) (France – Mediterranean) – Zm (? m)

OVERALL: Net = -6.1 ha; Rate = -27.98 % yr<sup>-1</sup>; Perc Final = 3 % > decrease

DECADAL: YES (12 yr)

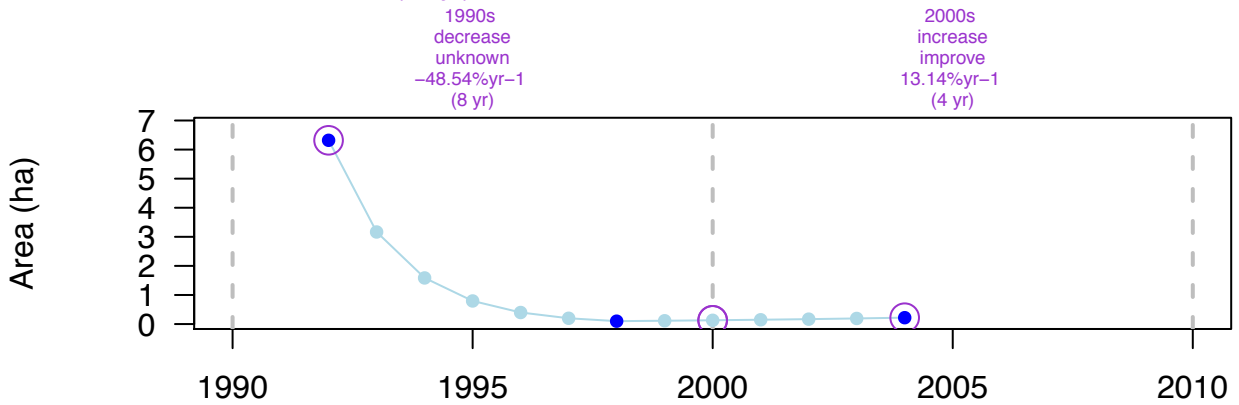



319\_area

Astier 1984, Bourcier 1996, 1989, Picard and Bourcier 1976, Picard 1978

SITE: La Ciotat – Les Leques (France – Mediterranean) – Po (? m)

OVERALL: Net = -139.56 ha; Rate = -0.71 % yr<sup>-1</sup>; Perc Final = 84 % > decrease

DECADAL: YES (24 yr)

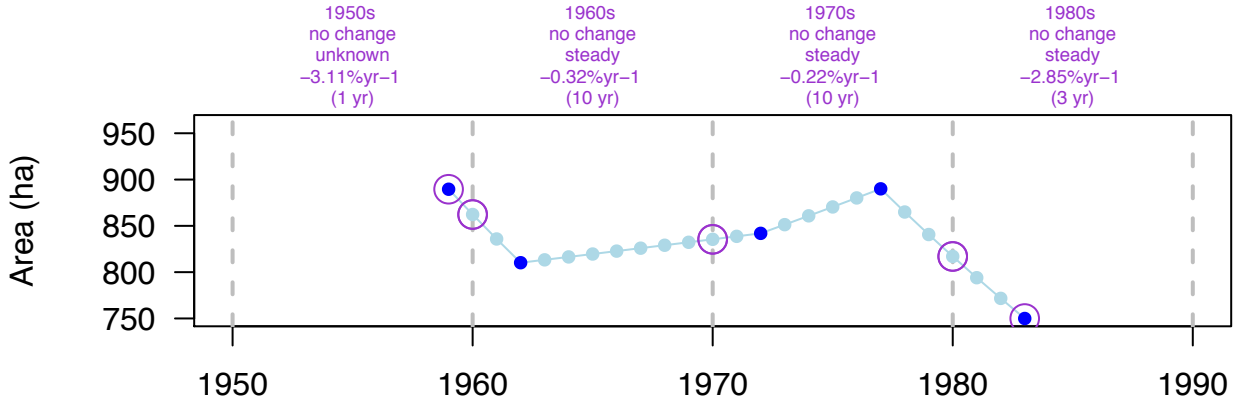

319\_lowerlimit

Astier 1984, Bourcier 1996, 1989, Picard and Bourcier 1976, Picard 1978

SITE: La Ciotat – Les Leques (France – Mediterranean) – Po (? m)

OVERALL: Net = -8 m; Rate = -5.19 % yr<sup>-1</sup>; Perc Final = 77 % > decrease

DECADAL: NO (5 yr)

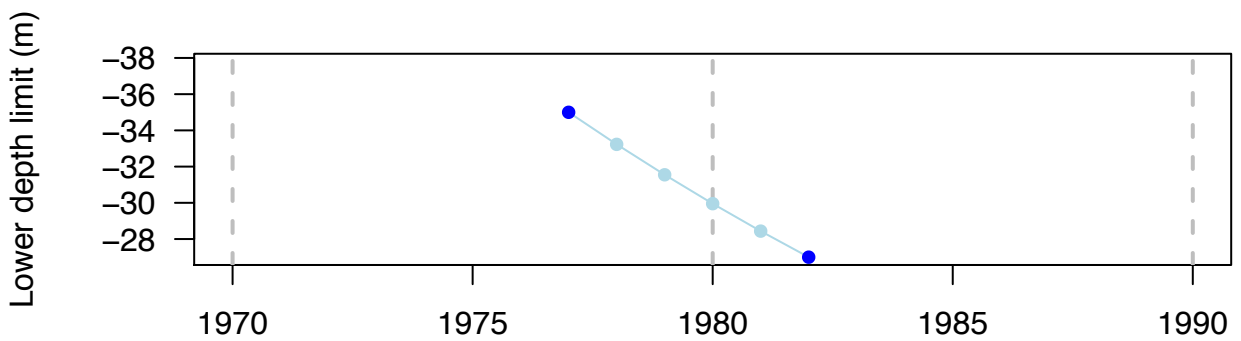

321\_cover

Bonhomme et al. 2010

SITE: La Palud Cove (France – Mediterranean) – Po (-34 m)

OVERALL: Net = -7.8 %; Rate = -6.36 % yr<sup>-1</sup>; Perc Final = 68 % > decrease

DECADAL: NO (6 yr)

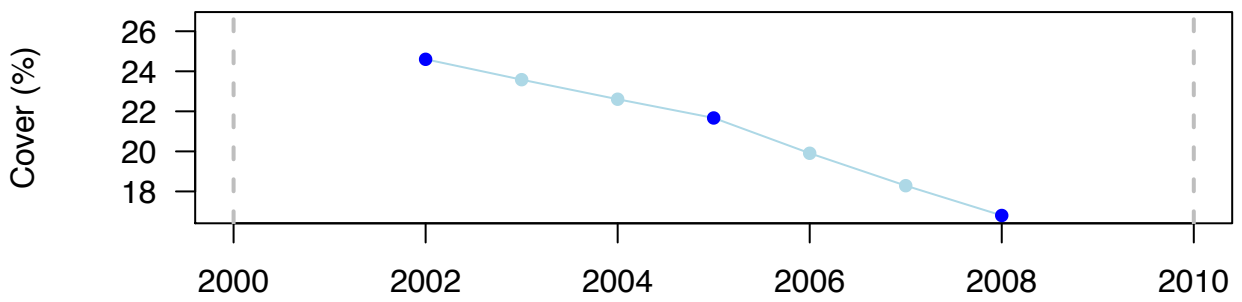

321\_density

Bonhomme et al. 2010

SITE: La Palud Cove (France – Mediterranean) – Po (-34 m)

OVERALL: Net = -73.4 shoot m<sup>-2</sup>; Rate = -15.42 % yr<sup>-1</sup>; Perc Final = 40 % > decrease

DECADAL: NO (6 yr)

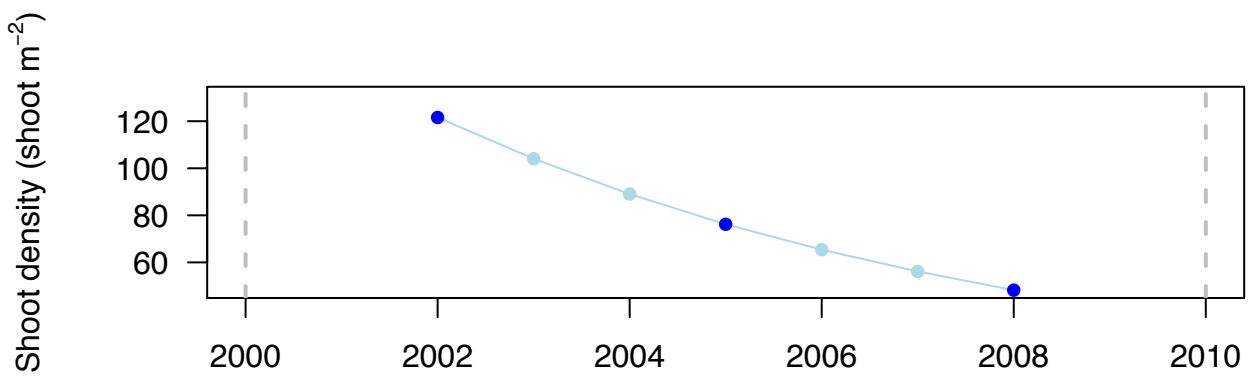

322\_cover

Bonhomme et al. 2010

SITE: Vaisseau – Tuf (France – Mediterranean) – Po (-34 m)

OVERALL: Net = -18.4 %; Rate = -21.63 % yr<sup>-1</sup>; Perc Final = 65 % > decrease

DECADAL: NO (2 yr)

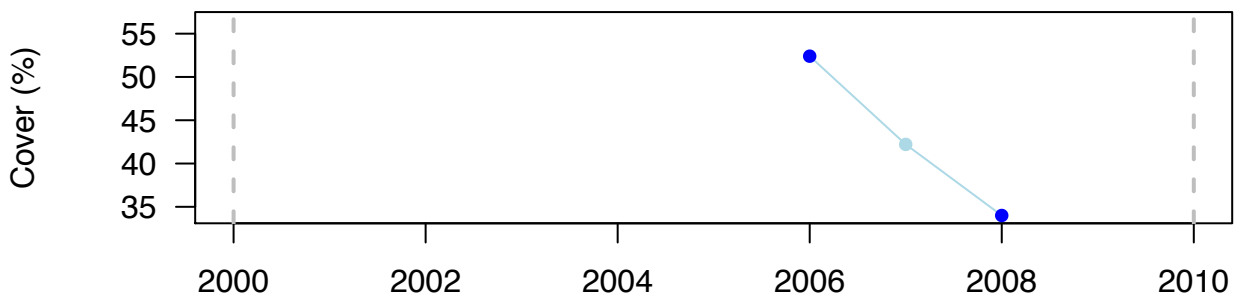

322\_density

Bonhomme et al. 2010

SITE: Vaisseau – Tuf (France – Mediterranean) – Po (-34 m)

OVERALL: Net = -3.2 shoot m<sup>-2</sup>; Rate = -1.54 % yr<sup>-1</sup>; Perc Final = 97 % > no change

DECADAL: NO (2 yr)

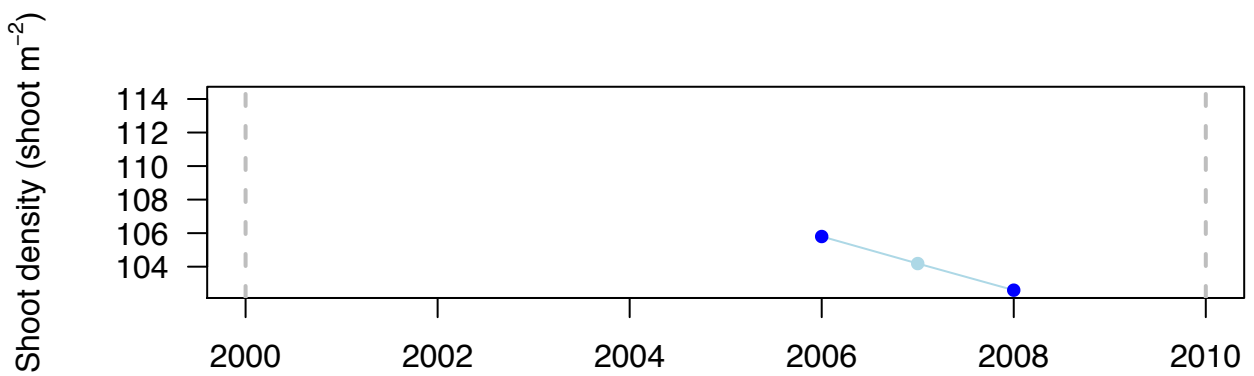

323\_area

Astruch et al. 2012

SITE: Bay de Port-Cros (barrier reef) (France – Mediterranean) – Po (–20 m)

OVERALL: Net = –0.31 ha; Rate = –0.66 % yr<sup>-1</sup>; Perc Final = 48 % > decrease

DECADAL: YES (110 yr)

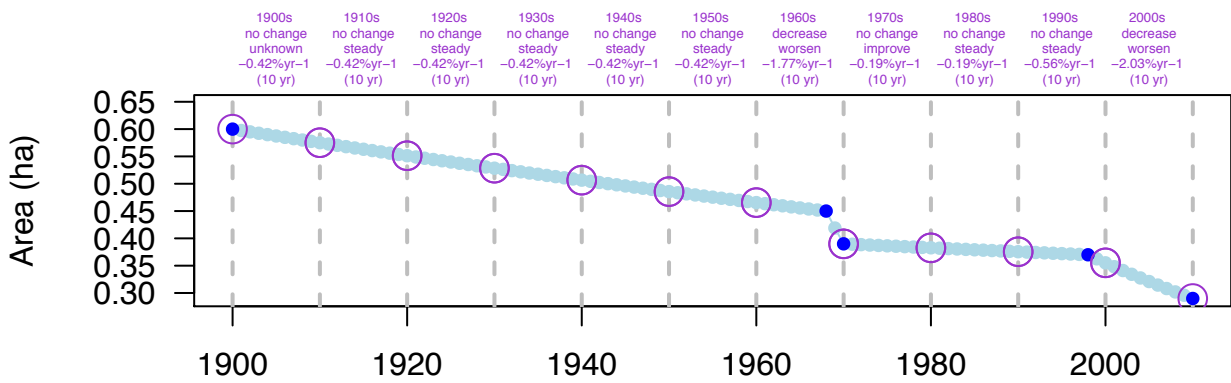

324\_area

Astier 1972, 1975, 1984, Nodot et al. 1978

SITE: Plages du Mourillon (France – Mediterranean) – Po (? m)

OVERALL: Net = –236 ha; Rate = –5.58 % yr<sup>-1</sup>; Perc Final = 35 % > decrease

DECADAL: YES (19 yr)

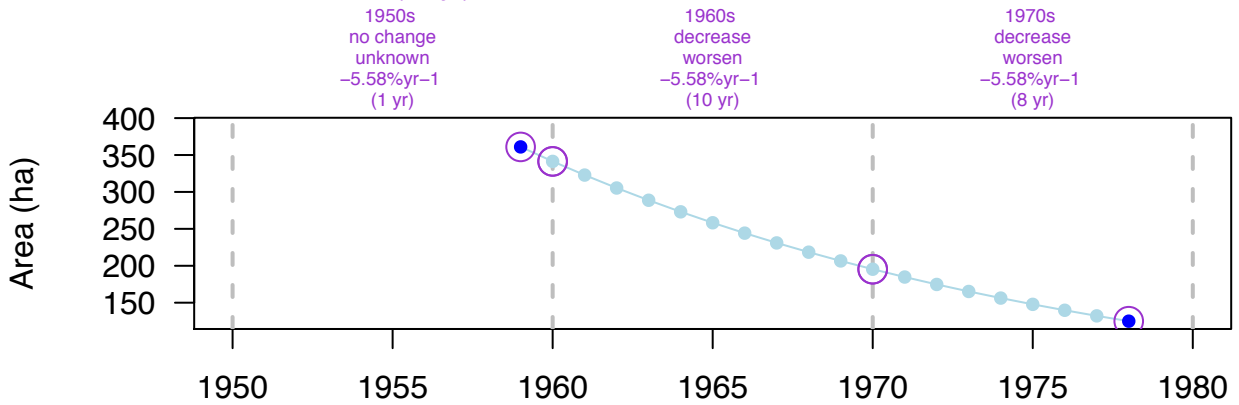

325\_area

Glemarec et al. 1997, Hily et al. 2003

SITE: Glenan Archipelago (France – Atlantic) – Zm (-5 m)

OVERALL: Net = -35.2 ha; Rate = -0.12 % yr<sup>-1</sup>; Perc Final = 92 % > no change

DECADAL: YES (68 yr)

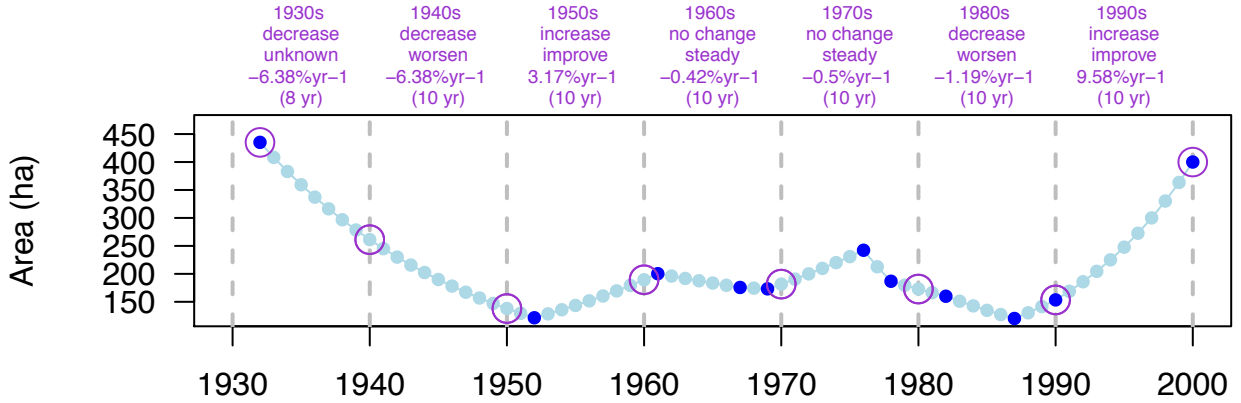

326\_area

Plus et al. 2010

SITE: Arcachon Bay (France – Atlantic) – Zn (0 m)

OVERALL: Net = -2280 ha; Rate = -2.25 % yr<sup>-1</sup>; Perc Final = 67 % > decrease

DECADAL: YES (18 yr)

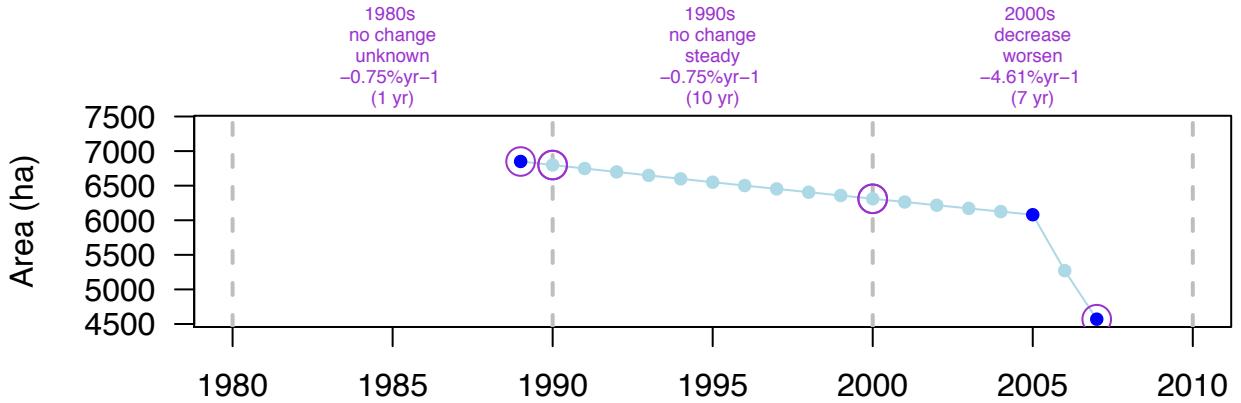

327\_area

Plus et al. 2010

SITE: Arcachon Bay (France – Atlantic) – Zm (-5 m)

OVERALL: Net = -270 ha; Rate = -6.54 % yr<sup>-1</sup>; Perc Final = 27 % > decrease

DECADAL: YES (20 yr)

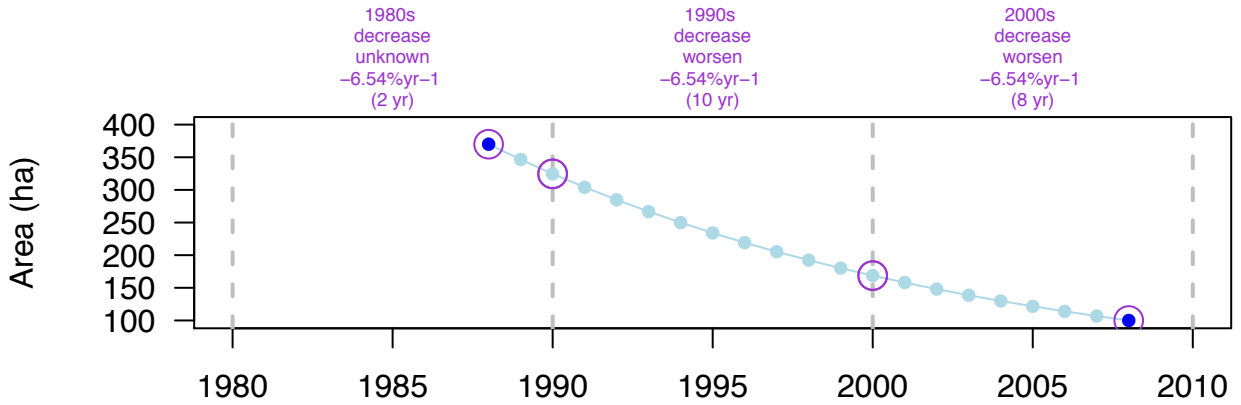

328\_area

Plus et al. 2010

SITE: Arguin Bank (France – Atlantic) – Zm (-5 m)

OVERALL: Net = -7 ha; Rate = -7.52 % yr<sup>-1</sup>; Perc Final = 22 % > decrease

DECADAL: YES (20 yr)

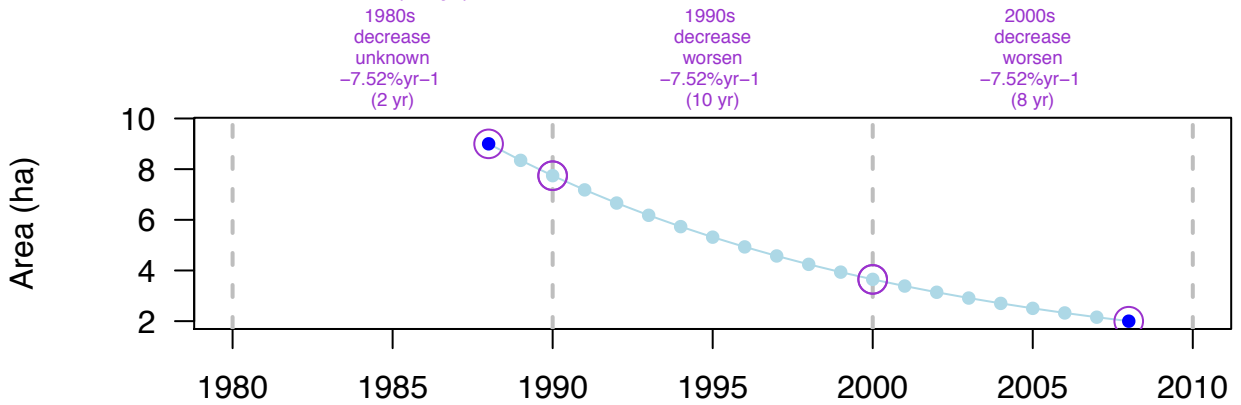

329\_area

Leriche et al. 2006

SITE: Bay of Saint-Cyr (France – Mediterranean) – Po (? m)

OVERALL: Net = -10.08 ha; Rate = -0.76 % yr<sup>-1</sup>; Perc Final = 85 % > decrease

DECADAL: YES (21 yr)

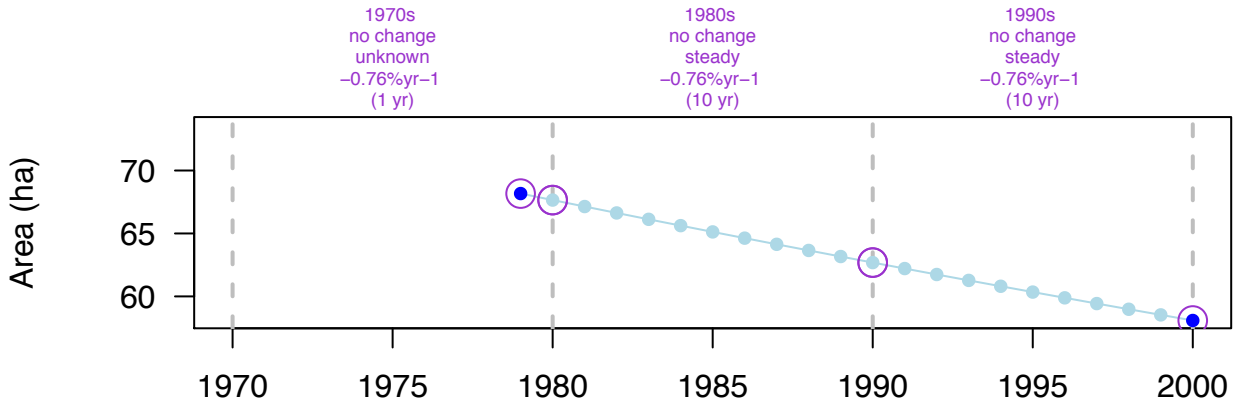

330\_area

Pergent-Martini et al. 2002

SITE: Marseilles (test area) (France – Mediterranean) – Po (-15 m)

OVERALL: Net = 0.14 ha; Rate = 1.27 % yr<sup>-1</sup>; Perc Final = 121 % > increase

DECADAL: YES (15 yr)

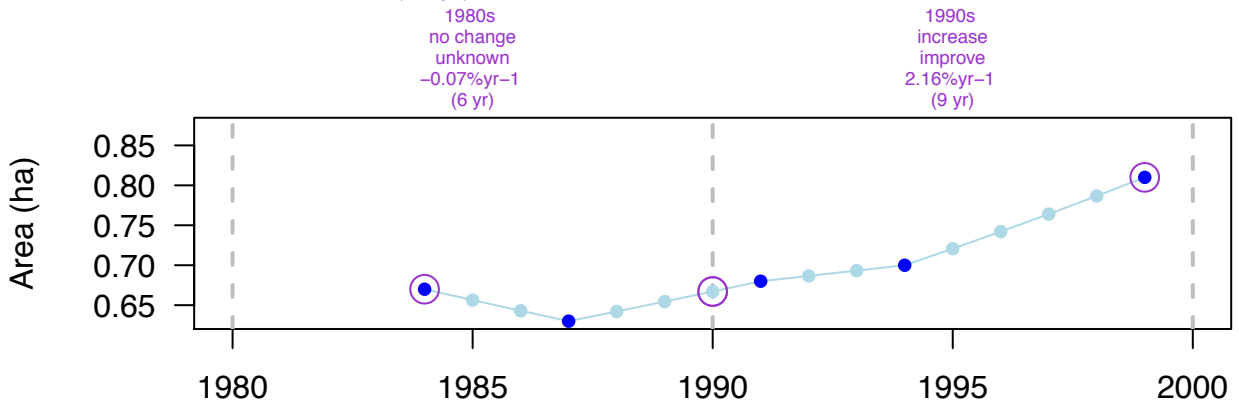

331\_density

Pergent-Martini et al. 2002

SITE: Marseilles (Cortiou – anthropissed) (France – Mediterranean) – Po (? m)

OVERALL: Net = -176 shoot m<sup>-2</sup>; Rate = -3.21 % yr<sup>-1</sup>; Perc Final = 68 % > decrease

DECADAL: YES (12 yr)

Shoot density (shoot m<sup>-2</sup>)

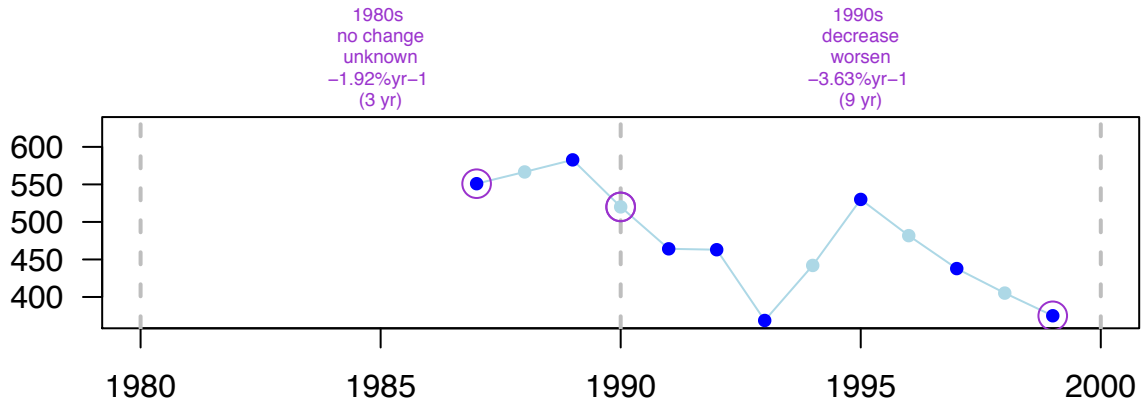

331\_lowerlimit

Pergent-Martini et al. 2002

SITE: Marseilles (Cortiou – anthropissed) (France – Mediterranean) – Po (? m)

OVERALL: Net = 0 m; Rate = 0 % yr<sup>-1</sup>; Perc Final = 100 % > no change

DECADAL: YES (10 yr)

Lower depth limit (m)

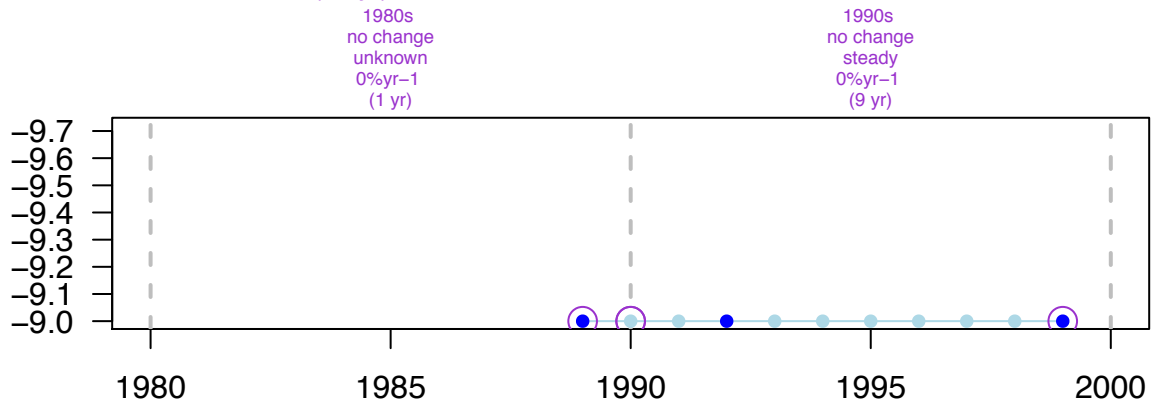



332\_density

Pergent-Martini et al. 2002

SITE: Marseilles (Riou – reference) (France – Mediterranean) – Po (? m)

OVERALL: Net = 2 shoot m<sup>-2</sup>; Rate = 0.07 % yr<sup>-1</sup>; Perc Final = 101 % > no change

DECADAL: YES (12 yr)

Shoot density (shoot m<sup>-2</sup>)

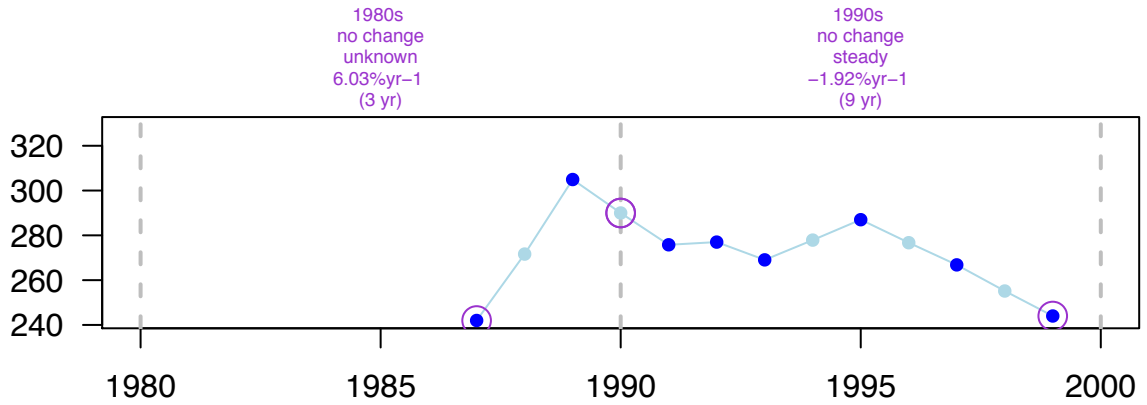

332\_lowerlimit

Pergent-Martini et al. 2002

SITE: Marseilles (Riou – reference) (France – Mediterranean) – Po (? m)

OVERALL: Net = 0 m; Rate = 0 % yr<sup>-1</sup>; Perc Final = 100 % > no change

DECADAL: YES (10 yr)

Lower depth limit (m)

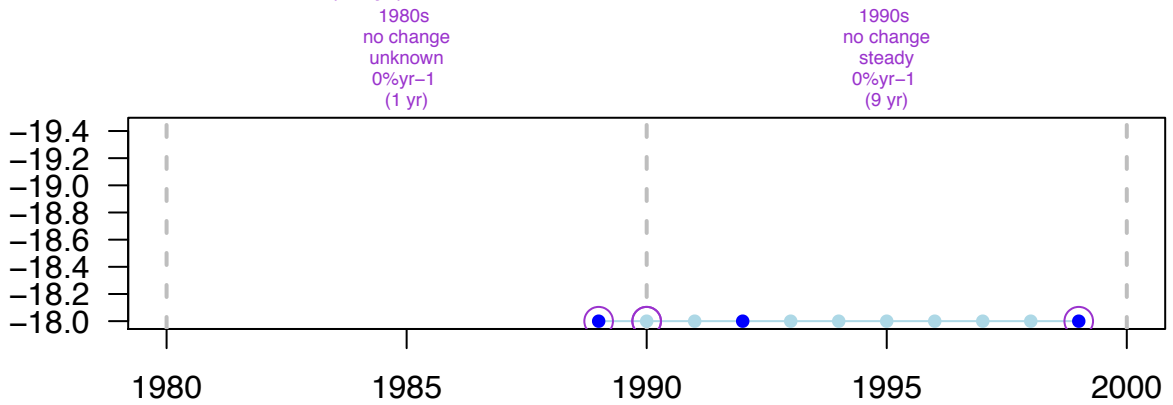

333\_area

Pergent-Martini and Pergent 1996

SITE: Plateau des Chèvres (France – Mediterranean) – Po (? m)

OVERALL: Net = -186 ha; Rate = -2.82 % yr<sup>-1</sup>; Perc Final = 59 % > decrease

DECADAL: YES (19 yr)

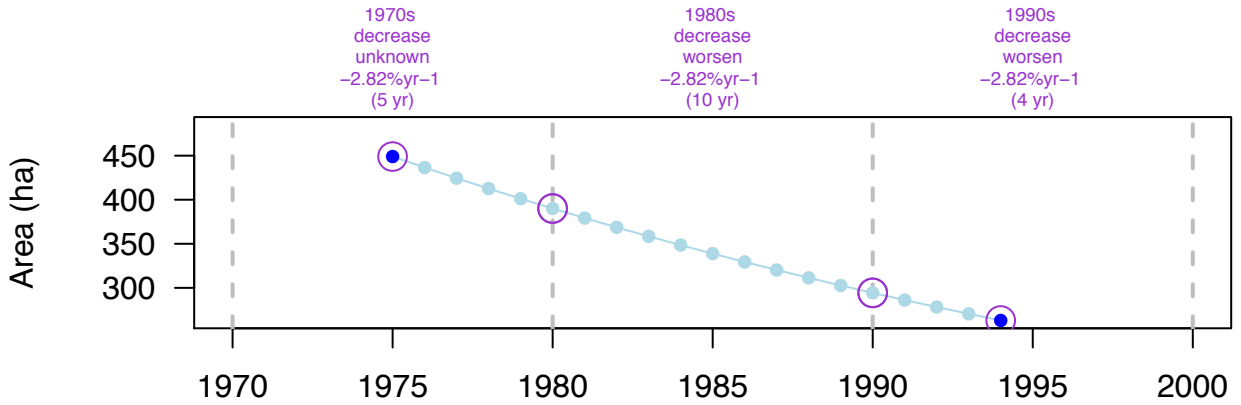

333\_lowerlimit

Pergent-Martini and Pergent 1996

SITE: Plateau des Chèvres (France – Mediterranean) – Po (? m)

OVERALL: Net = 0 m; Rate = 0 % yr<sup>-1</sup>; Perc Final = 100 % > no change

DECADAL: NO (7 yr)

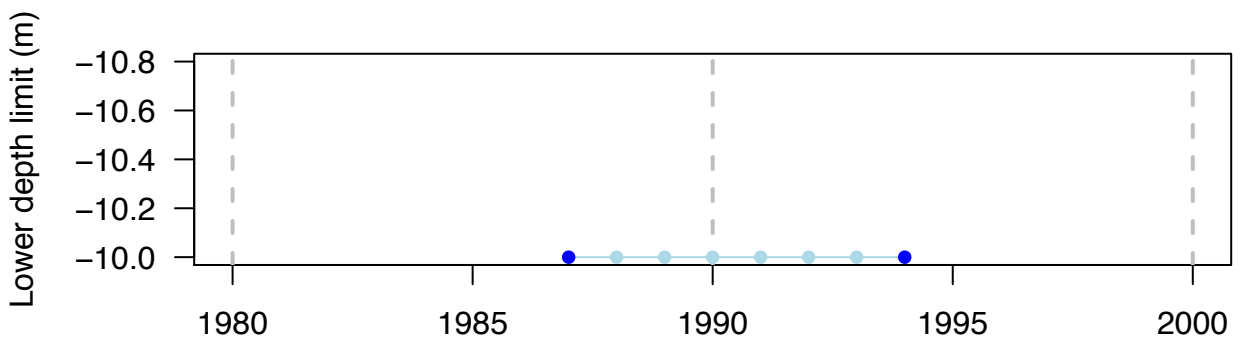

334\_area

Bonacorsi et al. 2013

SITE: Cap Corse (entire) (France – Mediterranean) – Po (? m)

OVERALL: Net = -231 ha; Rate = -0.14 % yr<sup>-1</sup>; Perc Final = 98 % > no change

DECADAL: YES (16 yr)

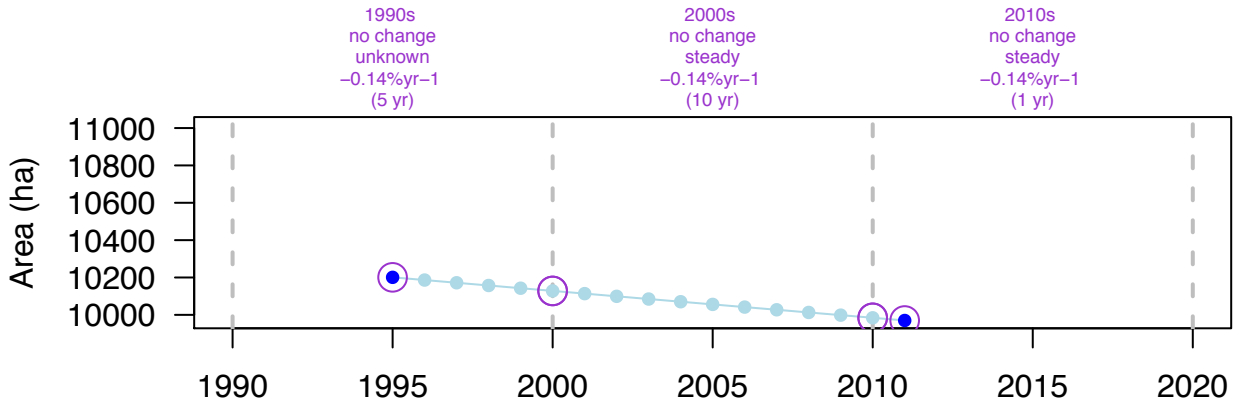

335\_area

Bonacorsi et al. 2013

SITE: Cap Corse (Macinaggio) (France – Mediterranean) – Po (? m)

OVERALL: Net = -43 ha; Rate = -0.8 % yr<sup>-1</sup>; Perc Final = 88 % > decrease

DECADAL: YES (16 yr)

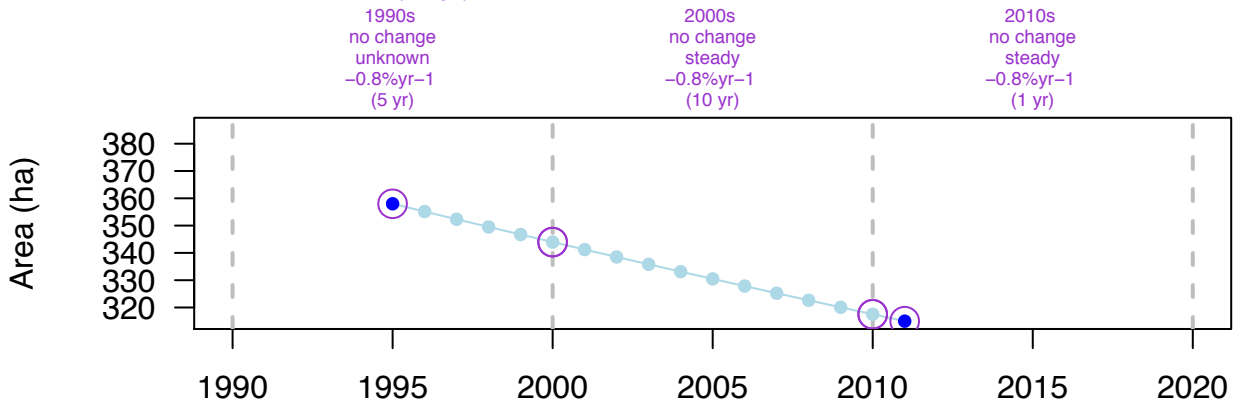

336\_area

Bonacorsi et al. 2013

SITE: Cap Corse (Saint Florent) (France – Mediterranean) – Po (? m)

OVERALL: Net = -1.08 ha; Rate = -0.22 % yr<sup>-1</sup>; Perc Final = 90 % > no change

DECADAL: YES (46 yr)

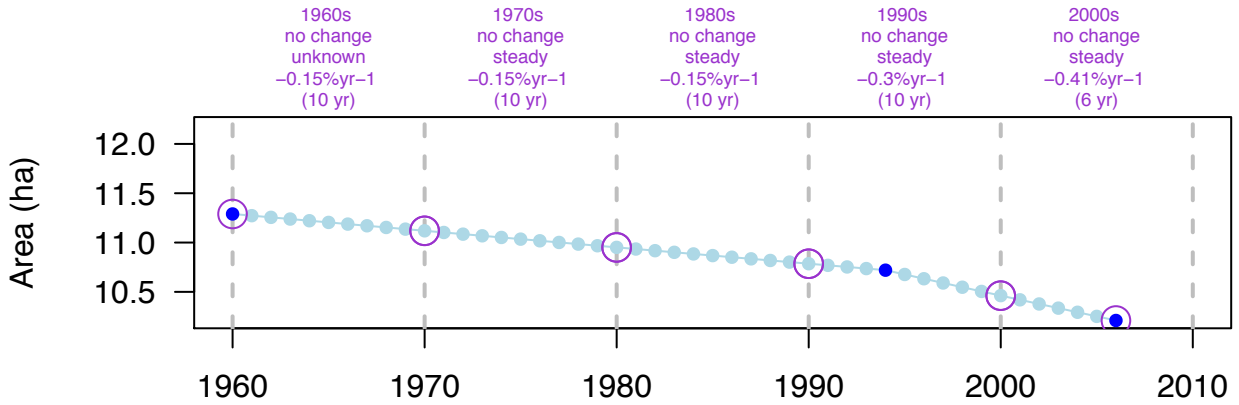

337\_area

Bonacorsi et al. 2013

SITE: Cap Corse (Saint Florent) (France – Mediterranean) – Cn (? m)

OVERALL: Net = -7 ha; Rate = -1.98 % yr<sup>-1</sup>; Perc Final = 40 % > decrease

DECADAL: YES (46 yr)

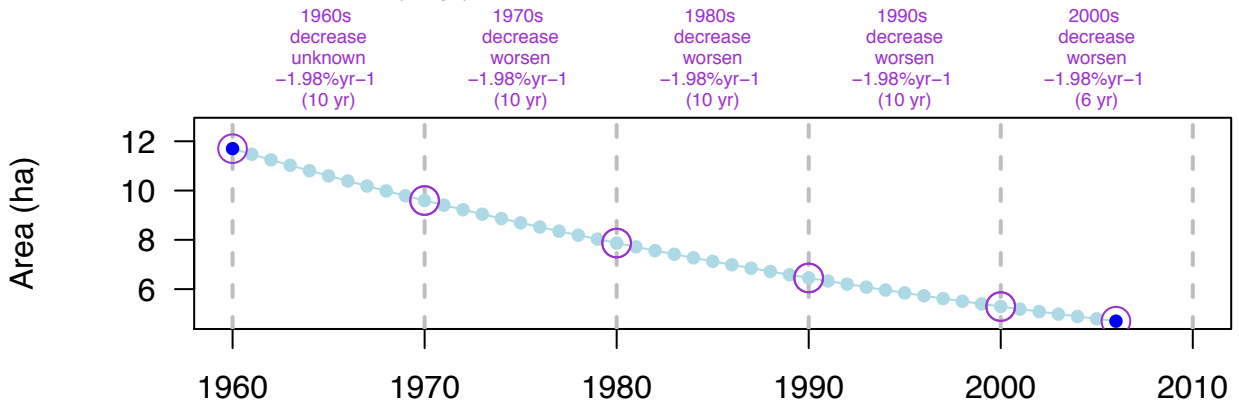

### 338\_area

Fournier et al. 2006, Auby et al. 2010

SITE: Plage de les Haas (France – Atlantic) – Zn (0 m)

OVERALL: Net = 21 ha; Rate = NA % yr<sup>-1</sup>; Perc Final = NA % > increase

DECADAL: YES (80 yr)

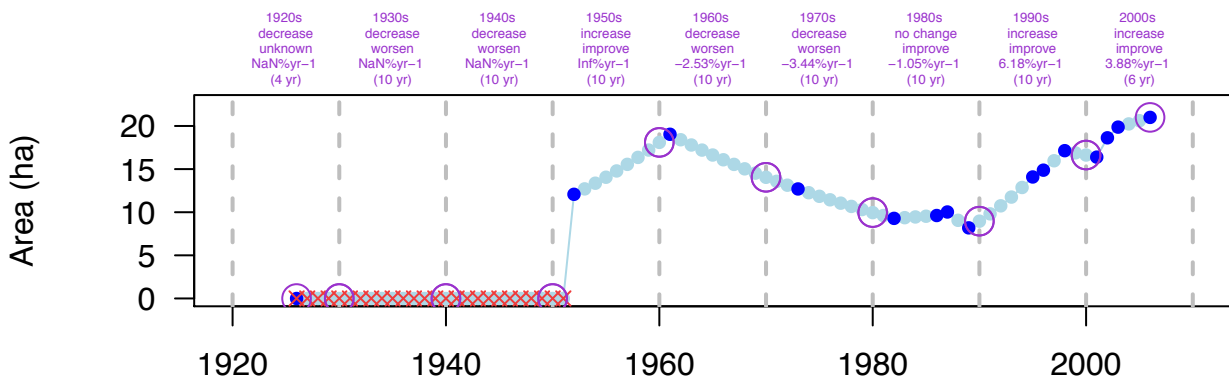

### 339\_area

Dolch et al. 2013, Dolch et al. 2017

SITE: Northfrisian Wadden Sea (Germany – Atlantic) – Zn (0 m)

OVERALL: Net = 2434.56 ha; Rate = 0.22 % yr<sup>-1</sup>; Perc Final = 119 % > increase

DECADAL: YES (80 yr)

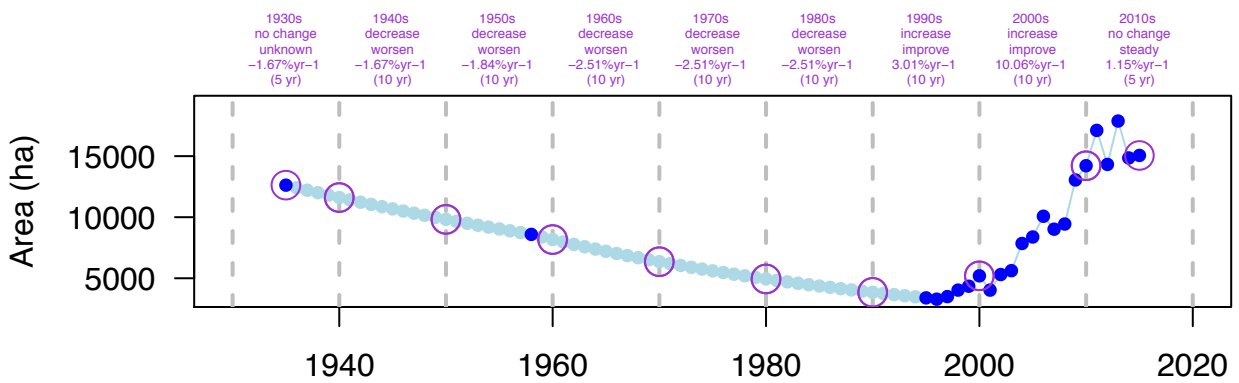

342\_area

Gambi et al. 2005

SITE: Maronti Bay (Italy – Mediterranean) – Po (? m)

OVERALL: Net = -2 ha; Rate = -34.66 % yr<sup>-1</sup>; Perc Final = 50 % > decrease

DECADAL: NO (2 yr)

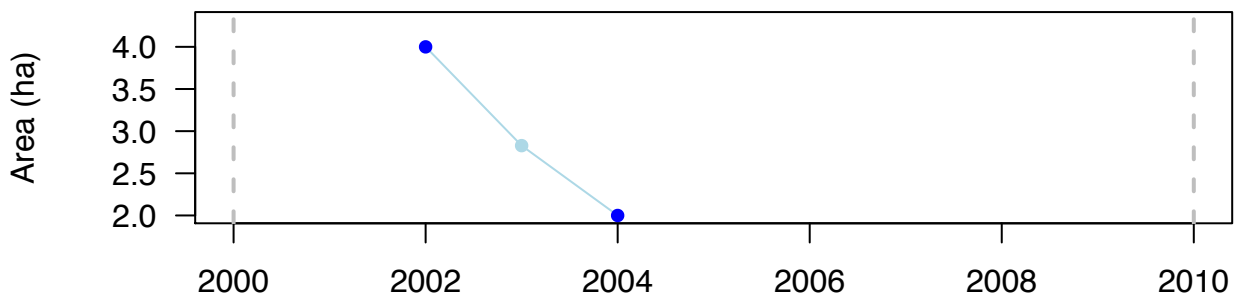

342\_lowerlimit

Gambi et al. 2005

SITE: Maronti Bay (Italy – Mediterranean) – Po (? m)

OVERALL: Net = -7 m; Rate = -16.43 % yr<sup>-1</sup>; Perc Final = 72 % > decrease

DECADAL: NO (2 yr)

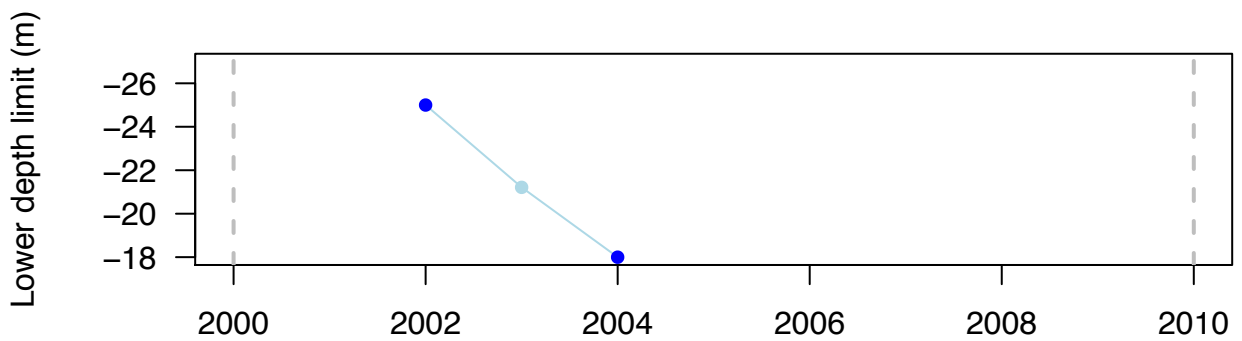

342\_upperlimit

Gambi et al. 2005

SITE: Maronti Bay (Italy – Mediterranean) – Po (? m)

OVERALL: Net = 0 m; Rate = 0 % yr<sup>-1</sup>; Perc Final = 100 % > no change

DECADAL: NO (2 yr)

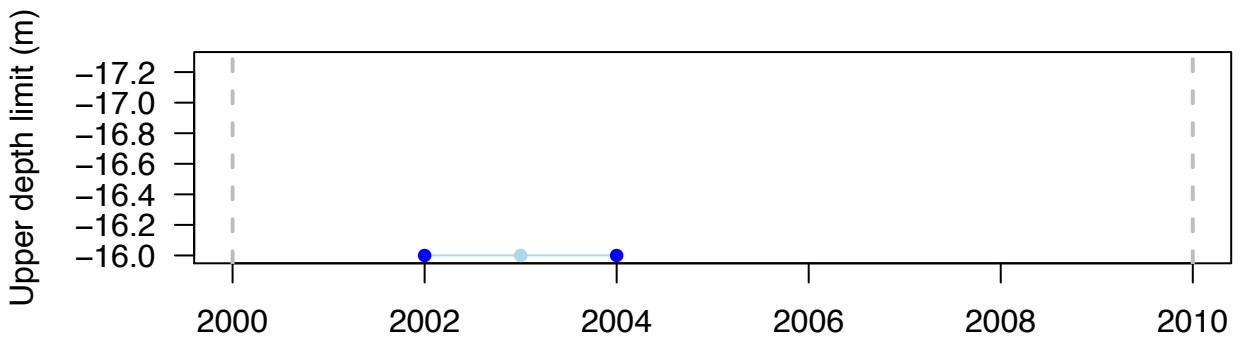

343\_area

Barsanti et al. 2007

SITE: Tigullio Gulf (all sectors) (Italy – Mediterranean) – Cn (? m)

OVERALL: Net = -127.7 ha; Rate = -3.76 % yr<sup>-1</sup>; Perc Final = 69 % > decrease

DECADAL: YES (10 yr)

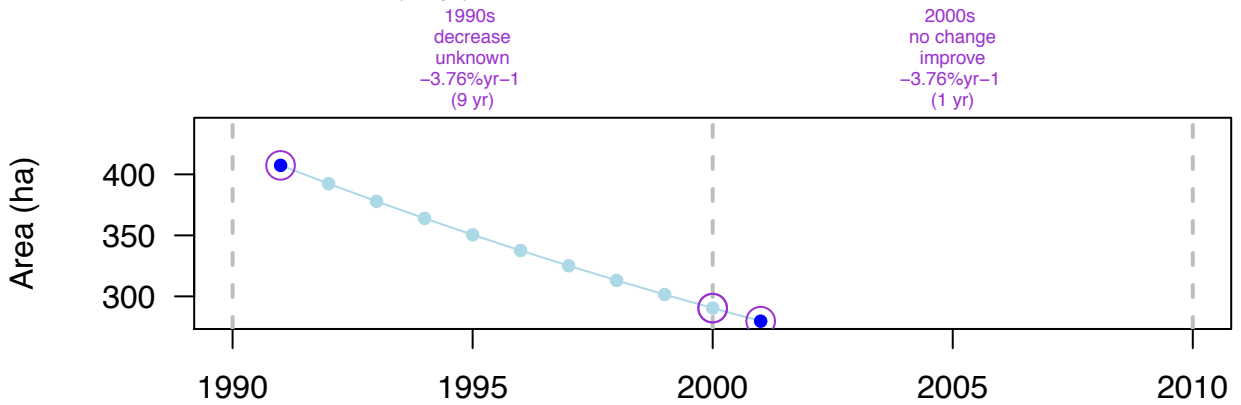

344\_area

Badalamenti et al. 2006, 2011

SITE: Cabo Feto (Italy – Mediterranean) – Po (? m)

OVERALL: Net = -54.98 ha; Rate = -8.98 % yr<sup>-1</sup>; Perc Final = 24 % > decrease

DECADAL: YES (16 yr)

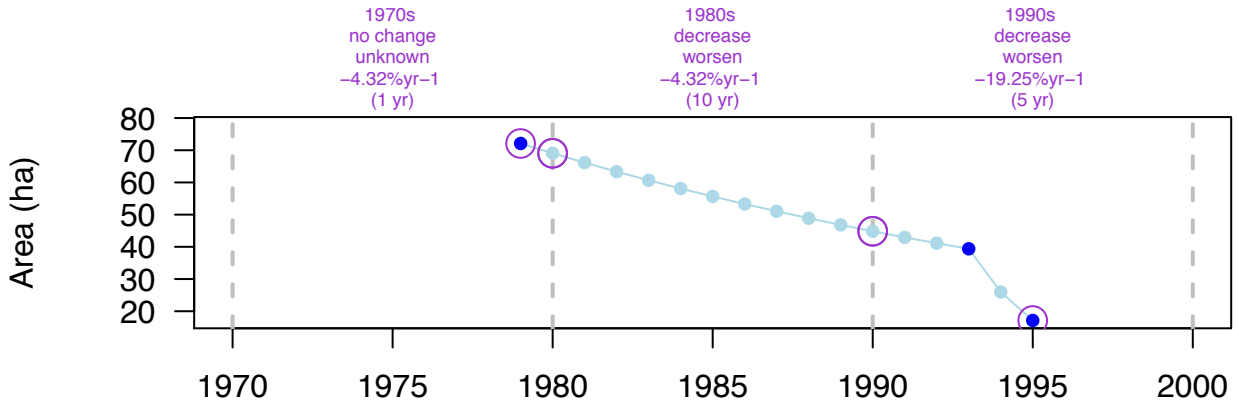

345\_area

Badalamenti et al. 2006, 2011

SITE: Cabo Feto (Italy – Mediterranean) – Cn (? m)

OVERALL: Net = 4.86 ha; Rate = NA % yr<sup>-1</sup>; Perc Final = NA % > increase

DECADAL: YES (16 yr)

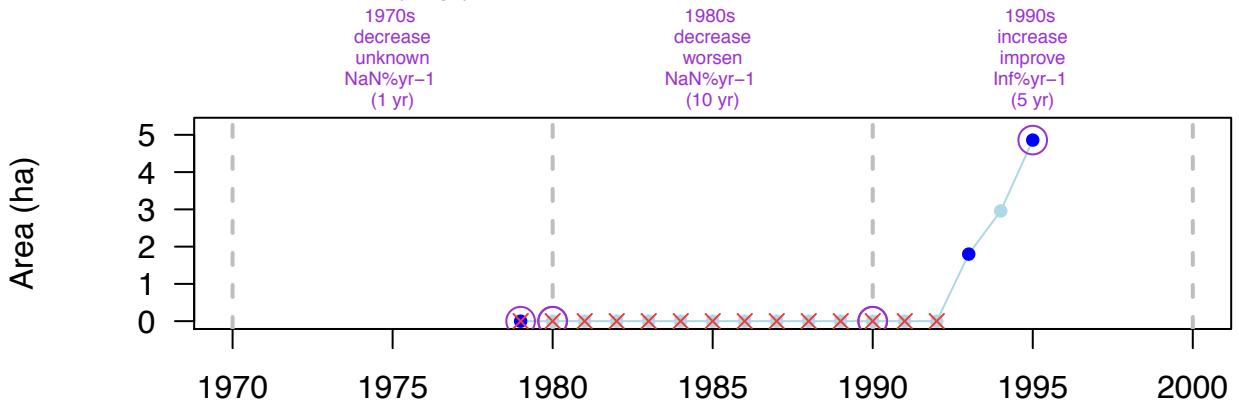



346\_area

Badalamenti et al. 2006, 2011

SITE: Cabo Feto (Italy – Mediterranean) – Po (? m)

OVERALL: Net = -26.21 ha; Rate = -2.89 % yr<sup>-1</sup>; Perc Final = 63 % > decrease

DECADAL: YES (16 yr)

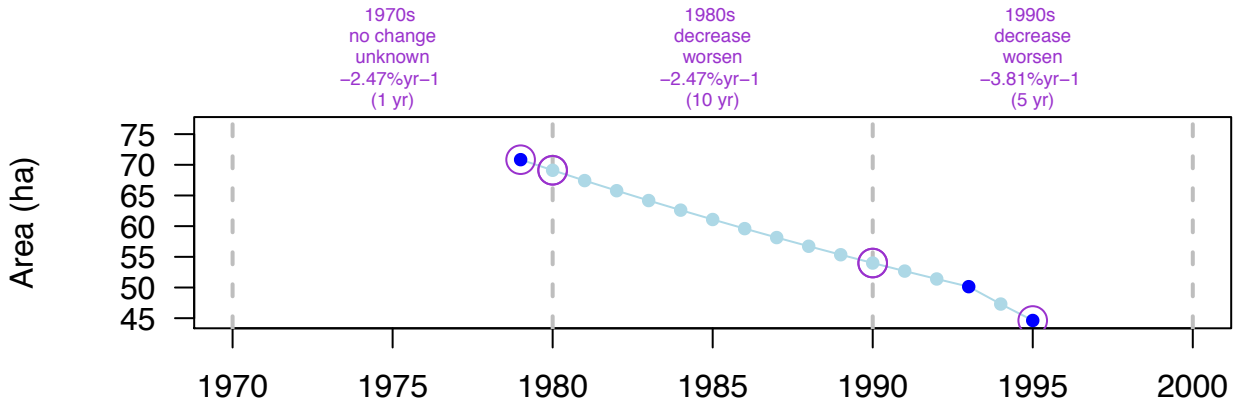

347\_cover

Peirano et al. 2011

SITE: Monterosso al Mare (Italy – Mediterranean) – Po (-10 m)

OVERALL: Net = 22.4 %; Rate = 2.46 % yr<sup>-1</sup>; Perc Final = 141 % > increase

DECADAL: YES (14 yr)

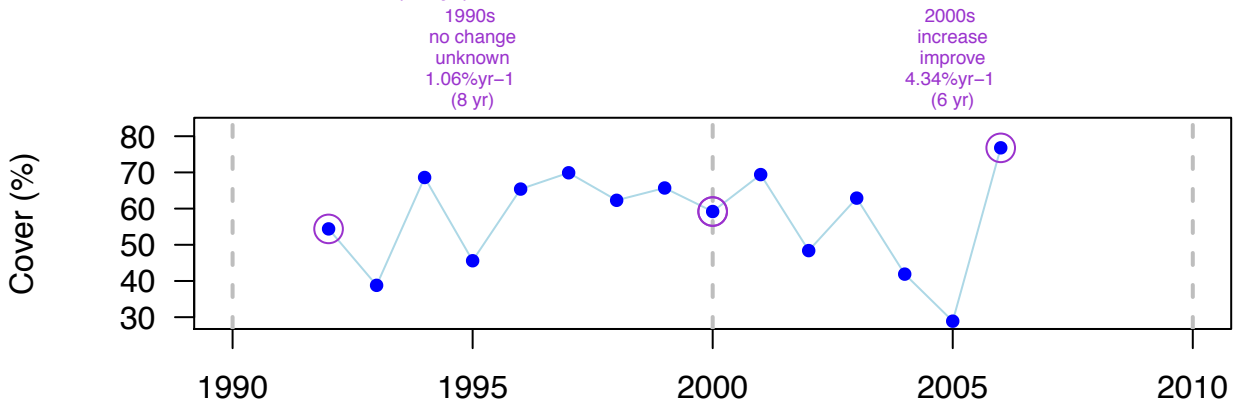

347\_density

Peirano et al. 2011

SITE: Monterosso al Mare (Italy – Mediterranean) – Po (-10 m)

OVERALL: Net = -129.5 shoot m<sup>-2</sup>; Rate = -3.4 % yr<sup>-1</sup>; Perc Final = 62 % > decrease

DECADAL: YES (14 yr)

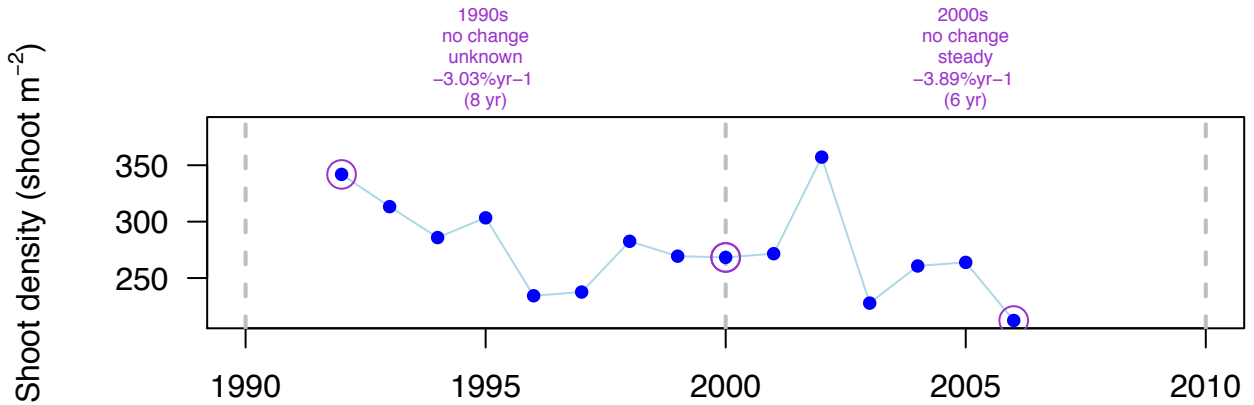

348\_cover

Peirano et al. 2011

SITE: Monterosso al Mare (Italy – Mediterranean) – Po (-17 m)

OVERALL: Net = 30 %; Rate = 5.56 % yr<sup>-1</sup>; Perc Final = 218 % > increase

DECADAL: YES (14 yr)

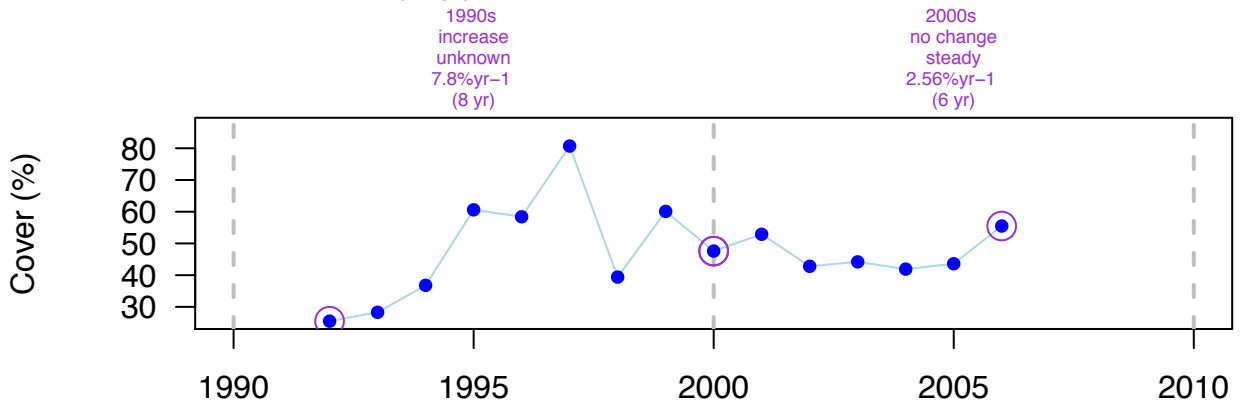

348\_density

Peirano et al. 2011

SITE: Monterosso al Mare (Italy – Mediterranean) – Po (-17 m)

OVERALL: Net = -71.4 shoot m<sup>-2</sup>; Rate = -2.67 % yr<sup>-1</sup>; Perc Final = 69 % > decrease

DECADAL: YES (14 yr)

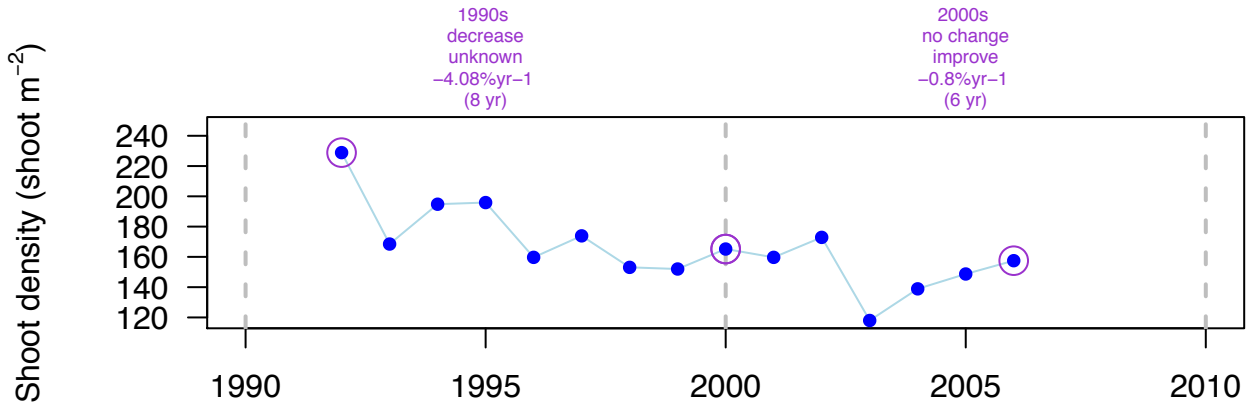

349\_cover

Peirano et al. 2011

SITE: Monterosso al Mare (Italy – Mediterranean) – Po (-5 m)

OVERALL: Net = 14.5 %; Rate = 2.58 % yr<sup>-1</sup>; Perc Final = 144 % > increase

DECADAL: YES (14 yr)

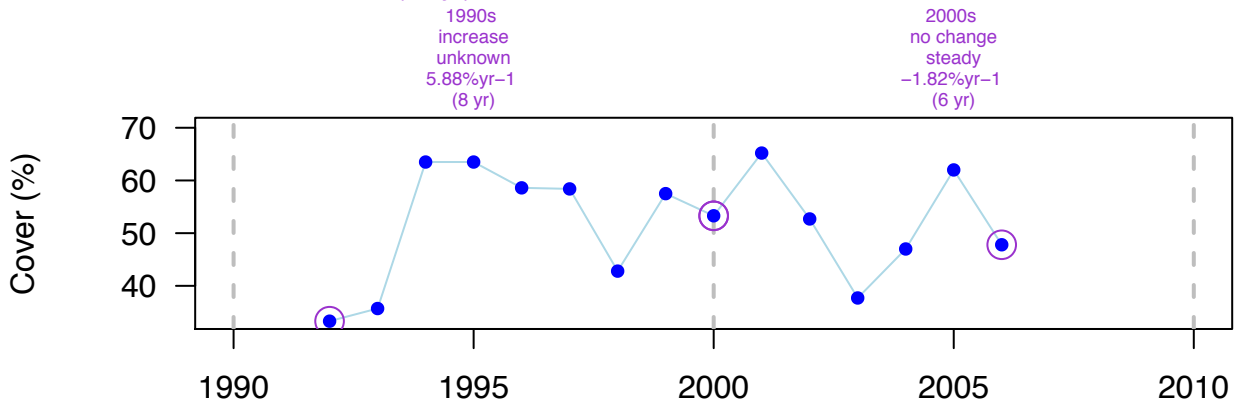

349\_density

Peirano et al. 2011

SITE: Monterosso al Mare (Italy – Mediterranean) – Po (-5 m)

OVERALL: Net = -63.7 shoot m<sup>-2</sup>; Rate = -1.15 % yr<sup>-1</sup>; Perc Final = 85 % > no change

DECADAL: YES (14 yr)

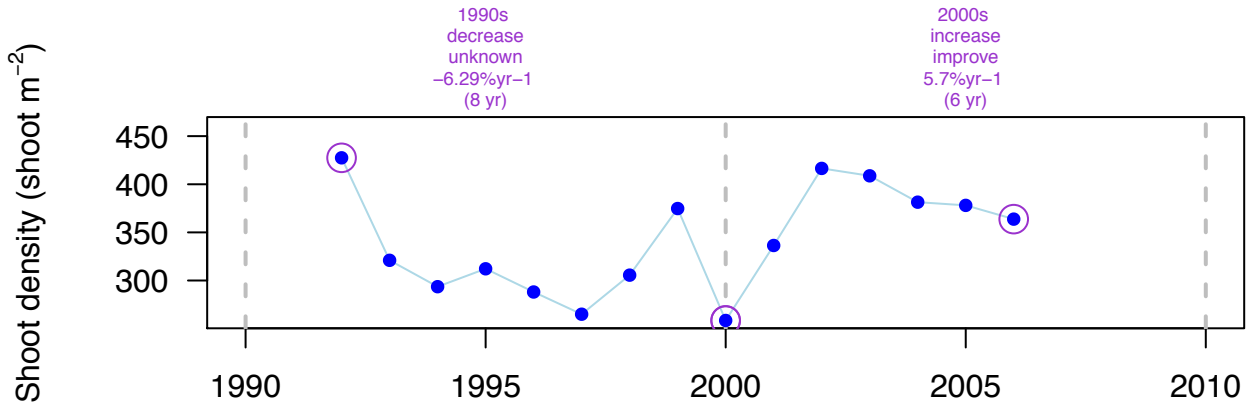

350\_area

Giovani et al. 2010

SITE: Orbetello lagoon (Italy – Mediterranean) – Zn (-1.2 m)

OVERALL: Net = 0.36 ha; Rate = 7.63 % yr<sup>-1</sup>; Perc Final = 158 % > increase

DECADAL: NO (6 yr)

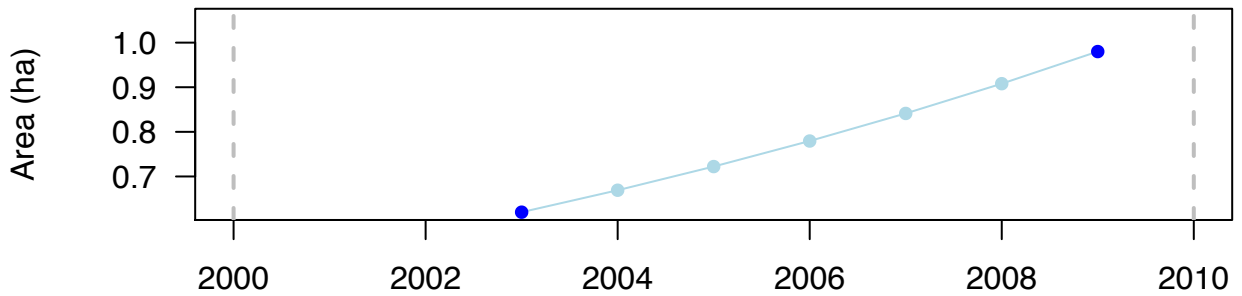

351\_area

Giovani et al. 2010

SITE: Orbetello lagoon (Italy – Mediterranean) – Cn (-1.2 m)

OVERALL: Net = -0.29 ha; Rate = -12.16 % yr<sup>-1</sup>; Perc Final = 48 % > decrease

DECADAL: NO (6 yr)

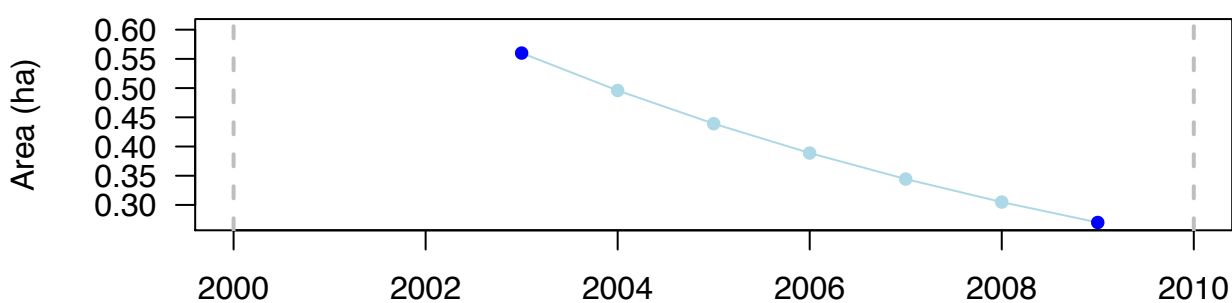

352\_lowerlimit

Falconetti and Meinesz 1989

SITE: Larvotto Beach (Monaco – Mediterranean) – Po (? m)

OVERALL: Net = -9 m; Rate = -4.85 % yr<sup>-1</sup>; Perc Final = 68 % > decrease

DECADAL: YES (8 yr)

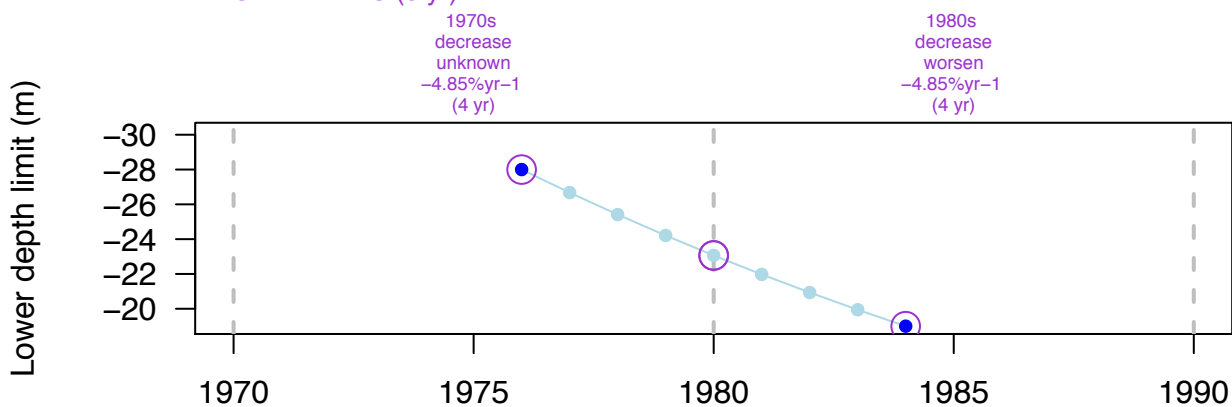

353\_area

Dolbeth et al. 2011, Neto et al. 2013

SITE: Mondego estuary (Portugal – Atlantic) – Zn (0 m)

OVERALL: Net = -0.15 ha; Rate = -0.04 % yr<sup>-1</sup>; Perc Final = 99 % > no change

DECADAL: YES (23 yr)

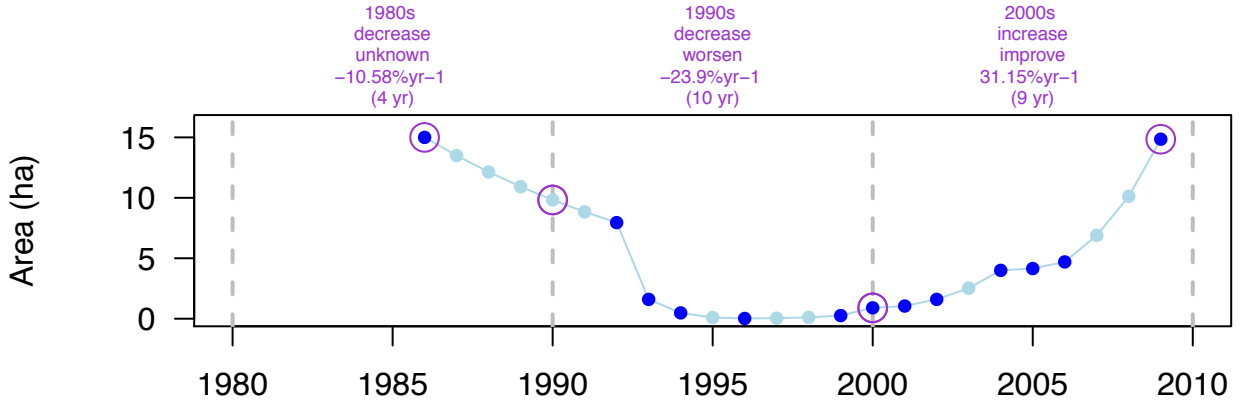

353\_biomass

Dolbeth et al. 2011, Neto et al. 2013

SITE: Mondego estuary (Portugal – Atlantic) – Zn (0 m)

OVERALL: Net = -160.5 g dw m<sup>-2</sup>; Rate = -8.24 % yr<sup>-1</sup>; Perc Final = 34 % > decrease

DECADAL: YES (13 yr)

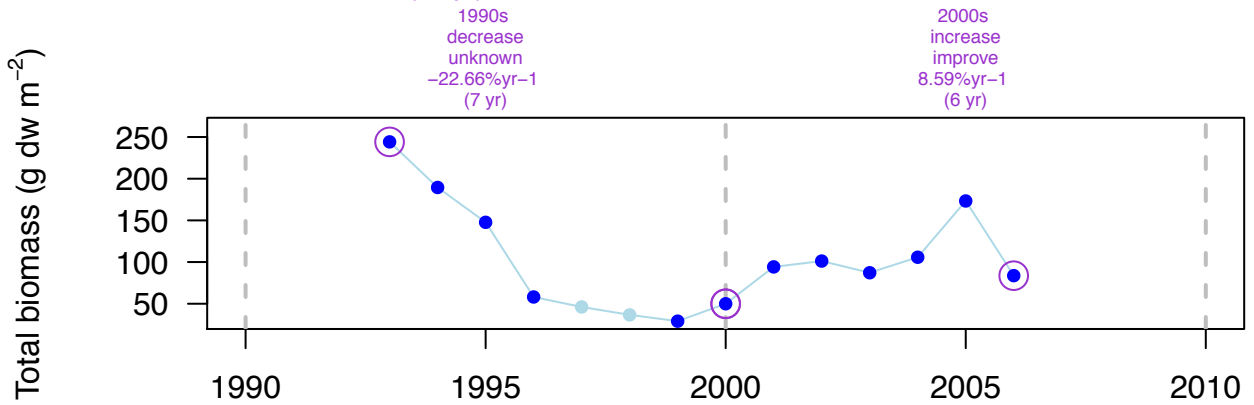

354\_cover

Pergent et al. 2015

SITE: Macinaggio (Corsica) (France – Mediterranean) – Po (-38 m)

OVERALL: Net = -7.6 %; Rate = -4.76 % yr<sup>-1</sup>; Perc Final = 65 % > decrease

DECADAL: YES (9 yr)

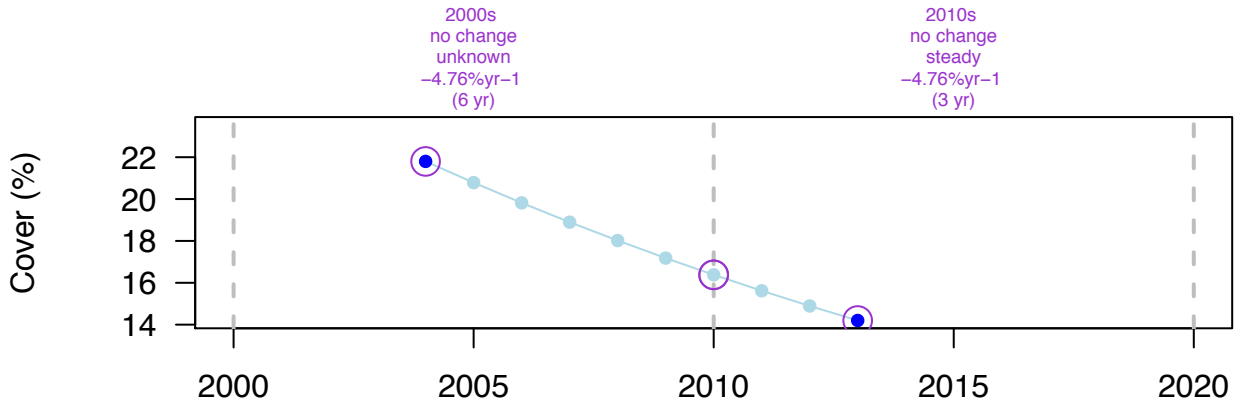

354\_density

Pergent et al. 2015

SITE: Macinaggio (Corsica) (France – Mediterranean) – Po (-38 m)

OVERALL: Net = 125 shoot m<sup>-2</sup>; Rate = 4.6 % yr<sup>-1</sup>; Perc Final = 151 % > increase

DECADAL: YES (9 yr)

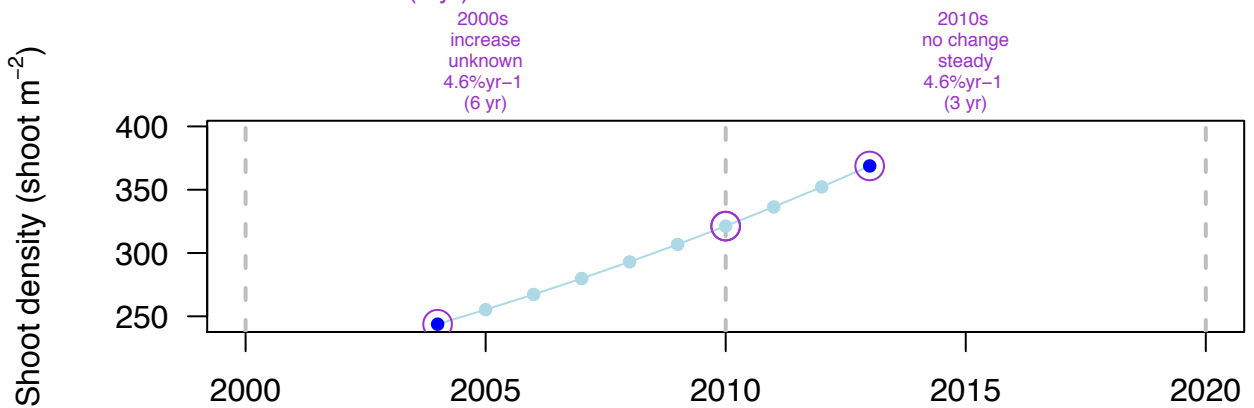

354\_lowerlimit

Pergent et al. 2015

SITE: Macinaggio (Corsica) (France – Mediterranean) – Po (-38 m)

OVERALL: Net = 0.1 m; Rate = 0.03 % yr<sup>-1</sup>; Perc Final = 100 % > no change

DECADAL: YES (9 yr)

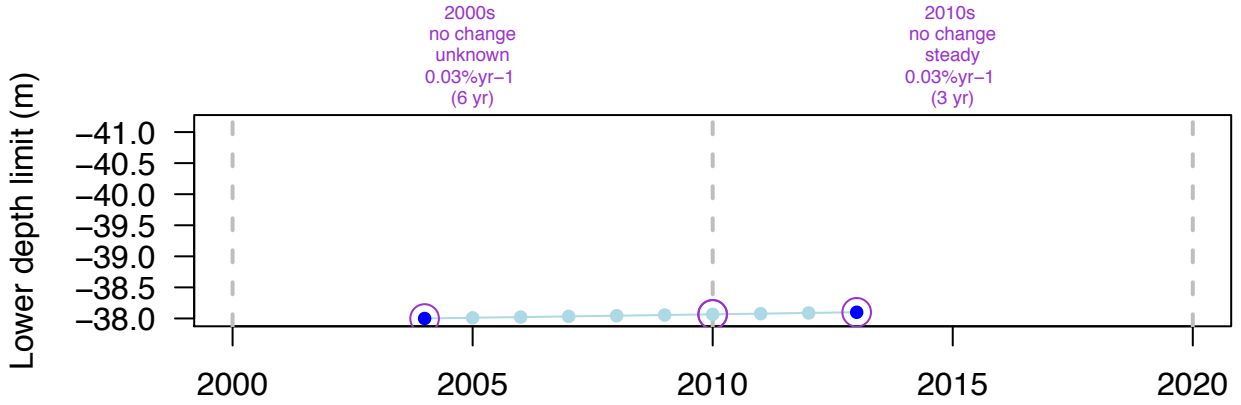

355\_cover

Pergent et al. 2015

SITE: Cap Sagro (Corsica) (France – Mediterranean) – Po (-33 m)

OVERALL: Net = -7.5 %; Rate = -9.33 % yr<sup>-1</sup>; Perc Final = 43 % > decrease

DECADAL: YES (9 yr)

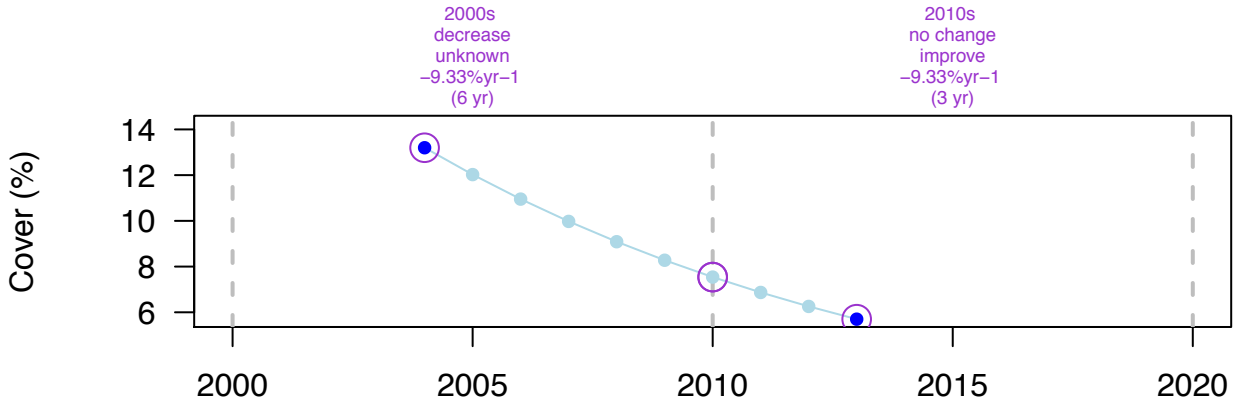



355\_density

Pergent et al. 2015

SITE: Cap Sagro (Corsica) (France – Mediterranean) – Po (-33 m)

OVERALL: Net = 36.8 shoot m<sup>-2</sup>; Rate = 1.42 % yr<sup>-1</sup>; Perc Final = 114 % > no change

DECADAL: YES (9 yr)

Shoot density (shoot m<sup>-2</sup>)

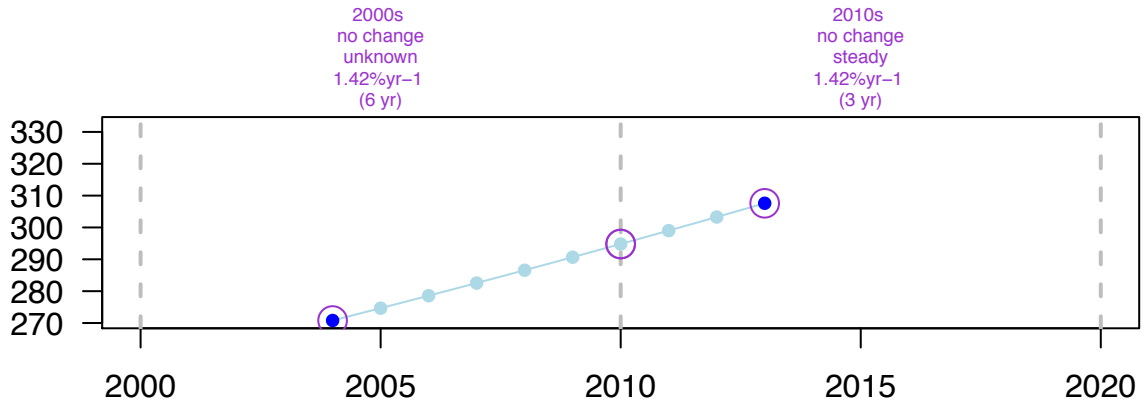

355\_lowerlimit

Pergent et al. 2015

SITE: Cap Sagro (Corsica) (France – Mediterranean) – Po (-33 m)

OVERALL: Net = 0 m; Rate = 0 % yr<sup>-1</sup>; Perc Final = 100 % > no change

DECADAL: YES (9 yr)

Lower depth limit (m)

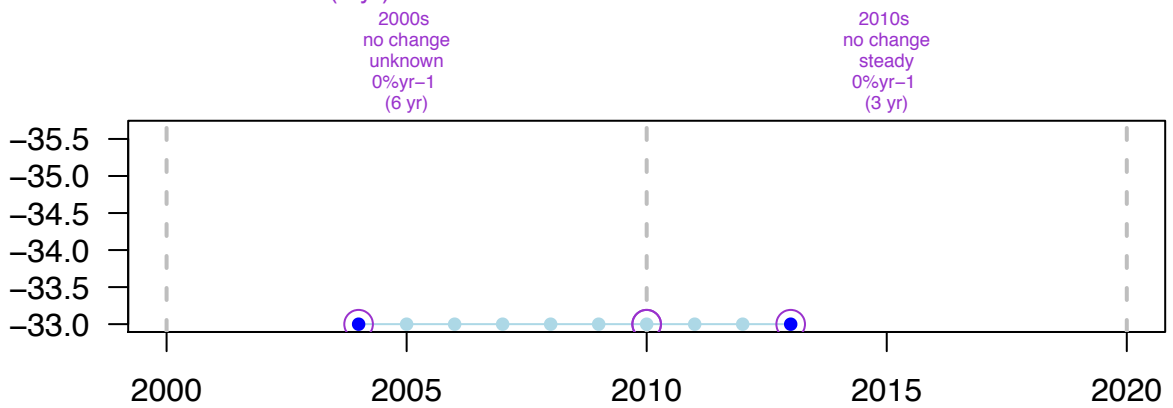

356\_cover

Pergent et al. 2015

SITE: Toga (Corsica) (France – Mediterranean) – Po (-24 m)

OVERALL: Net = 22.1 %; Rate = 8.54 % yr<sup>-1</sup>; Perc Final = 216 % > increase

DECADAL: YES (9 yr)

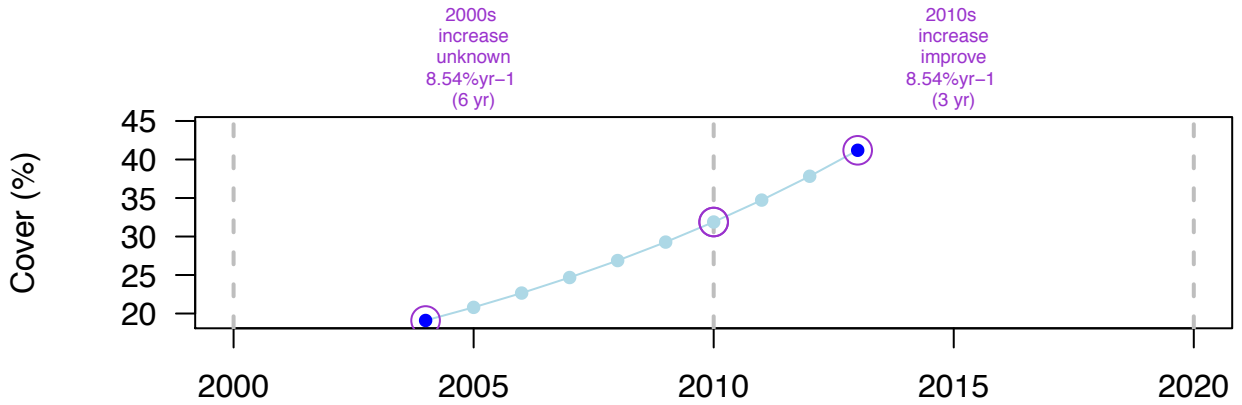

356\_density

Pergent et al. 2015

SITE: Toga (Corsica) (France – Mediterranean) – Po (-24 m)

OVERALL: Net = 37.7 shoot m<sup>-2</sup>; Rate = 1.68 % yr<sup>-1</sup>; Perc Final = 116 % > no change

DECADAL: YES (9 yr)

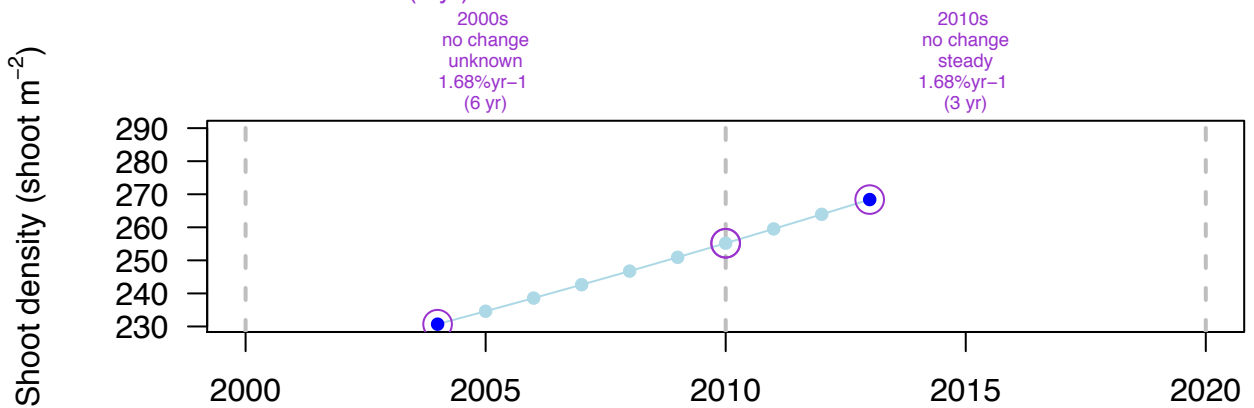

356\_lowerlimit

Pergent et al. 2015

SITE: Toga (Corsica) (France – Mediterranean) – Po (-24 m)

OVERALL: Net = 0.1 m; Rate = 0.05 % yr<sup>-1</sup>; Perc Final = 100 % > no change

DECADAL: YES (9 yr)

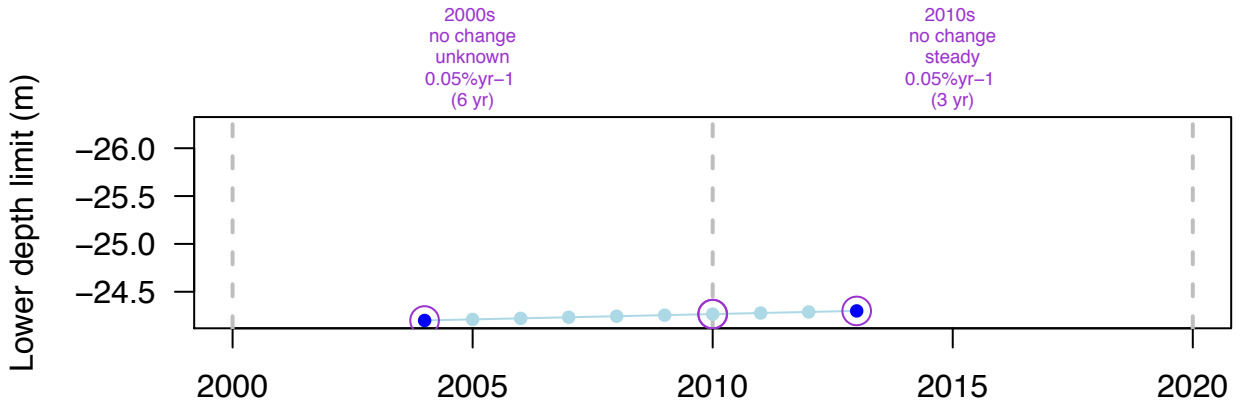

357\_cover

Pergent et al. 2015

SITE: Arinella (Corsica) (France – Mediterranean) – Po (-26.9 m)

OVERALL: Net = -47.7 %; Rate = -23.13 % yr<sup>-1</sup>; Perc Final = 12 % > decrease

DECADAL: YES (9 yr)

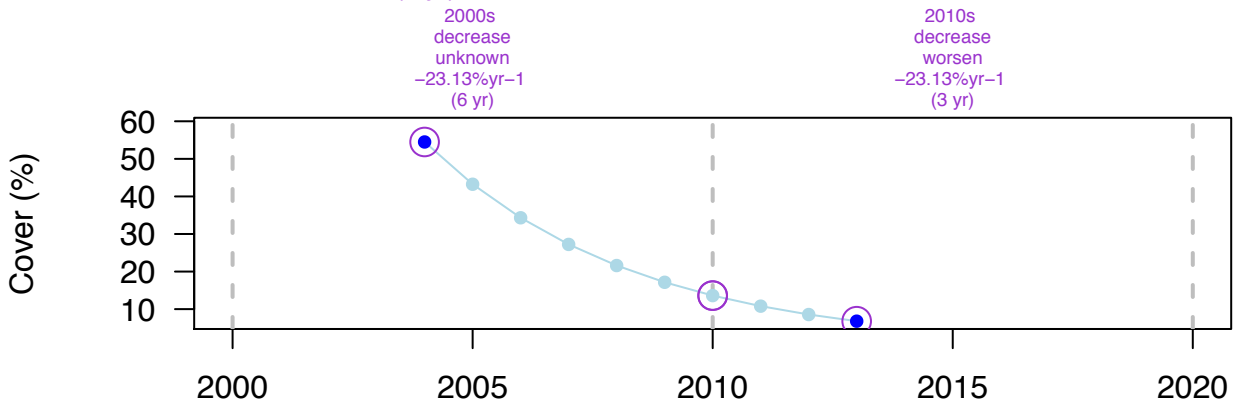

357\_density

Pergent et al. 2015

SITE: Arinella (Corsica) (France – Mediterranean) – Po (-26.9 m)

OVERALL: Net = 14 shoot m<sup>-2</sup>; Rate = 0.61 % yr<sup>-1</sup>; Perc Final = 106 % > no change

DECADAL: YES (9 yr)

Shoot density (shoot m<sup>-2</sup>)

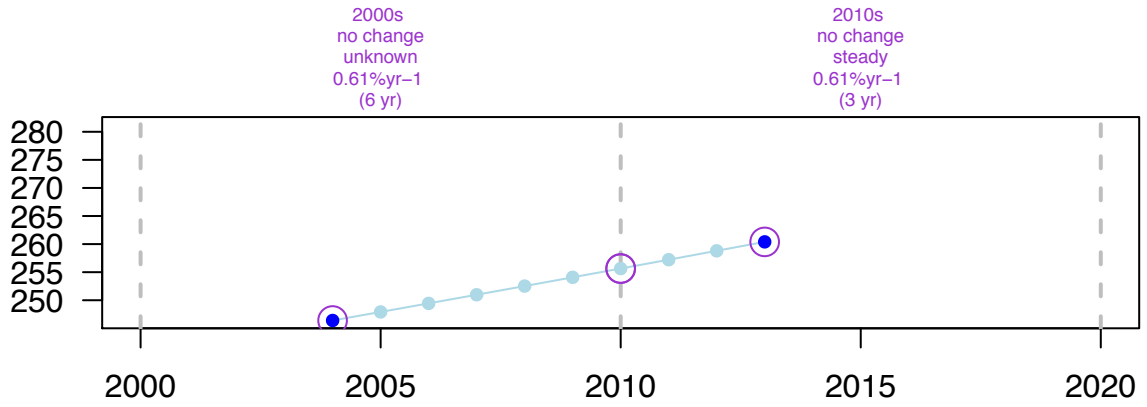

357\_lowerlimit

Pergent et al. 2015

SITE: Arinella (Corsica) (France – Mediterranean) – Po (-26.9 m)

OVERALL: Net = 0 m; Rate = 0 % yr<sup>-1</sup>; Perc Final = 100 % > no change

DECADAL: YES (9 yr)

Lower depth limit (m)

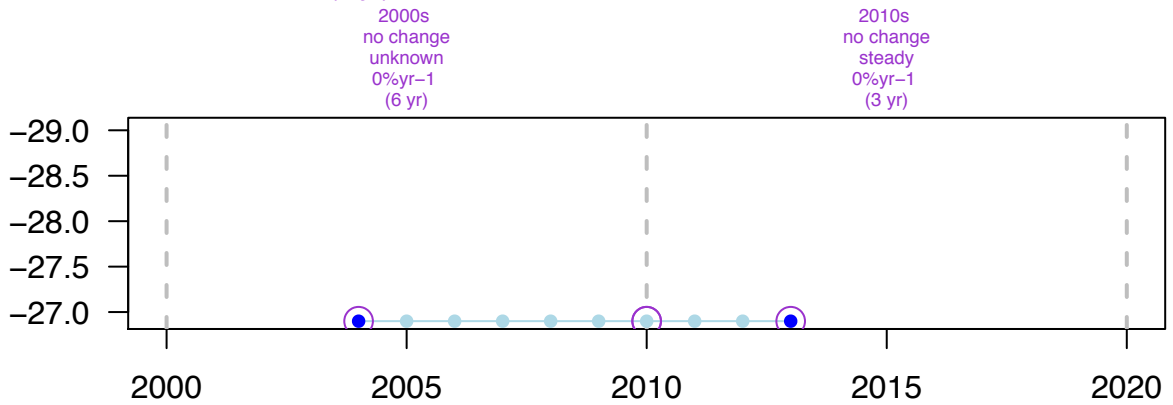

358\_cover

Pergent et al. 2015

SITE: Bravone (Corsica) (France – Mediterranean) – Po (-36 m)

OVERALL: Net = -12.6 %; Rate = -4.09 % yr<sup>-1</sup>; Perc Final = 69 % > decrease

DECADAL: YES (9 yr)

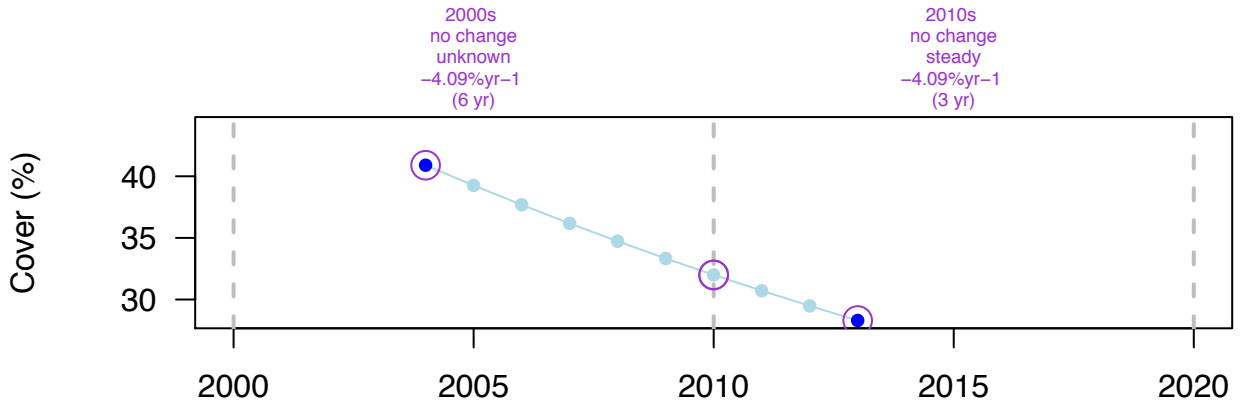

358\_density

Pergent et al. 2015

SITE: Bravone (Corsica) (France – Mediterranean) – Po (-36 m)

OVERALL: Net = -6.7 shoot m<sup>-2</sup>; Rate = -0.24 % yr<sup>-1</sup>; Perc Final = 98 % > no change

DECADAL: YES (9 yr)

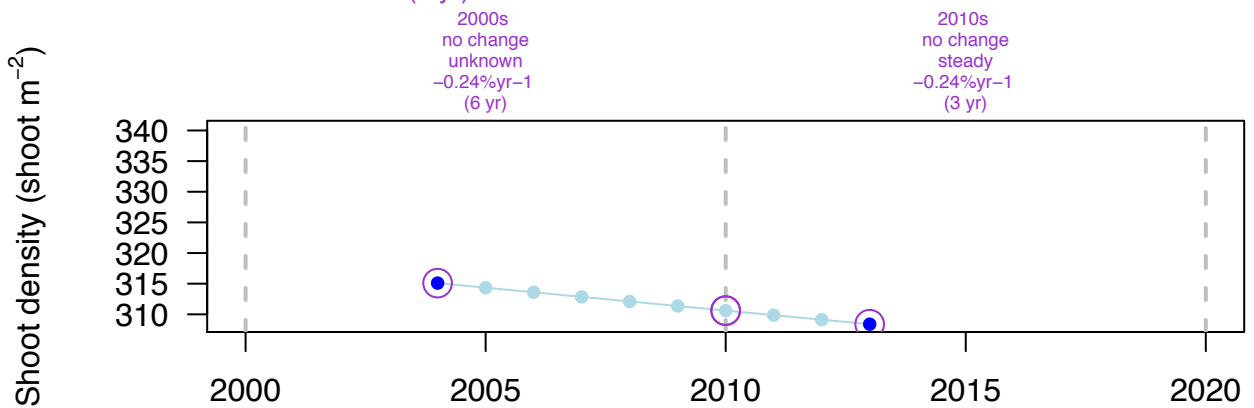

358\_lowerlimit

Pergent et al. 2015

SITE: Bravone (Corsica) (France – Mediterranean) – Po (-36 m)

OVERALL: Net = -0.09 m; Rate = -0.03 % yr<sup>-1</sup>; Perc Final = 100 % > no change

DECADAL: YES (9 yr)

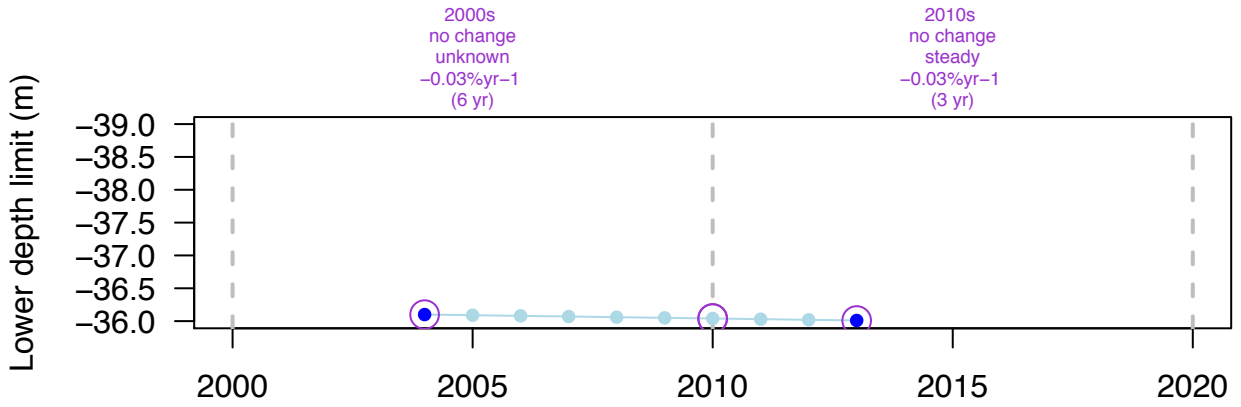

359\_cover

Pergent et al. 2015

SITE: Favone (Corsica) (France – Mediterranean) – Po (-36.9 m)

OVERALL: Net = -0.1 %; Rate = -0.16 % yr<sup>-1</sup>; Perc Final = 99 % > no change

DECADAL: YES (8 yr)

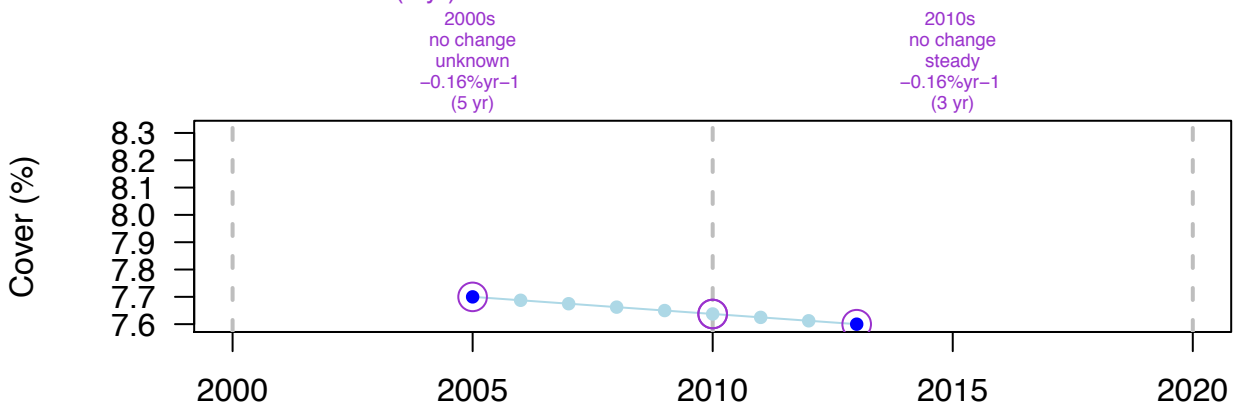

359\_density

Pergent et al. 2015

SITE: Favone (Corsica) (France – Mediterranean) – Po (-36.9 m)

OVERALL: Net = -2.2 shoot m<sup>-2</sup>; Rate = -0.08 % yr<sup>-1</sup>; Perc Final = 99 % > no change

DECADAL: YES (8 yr)

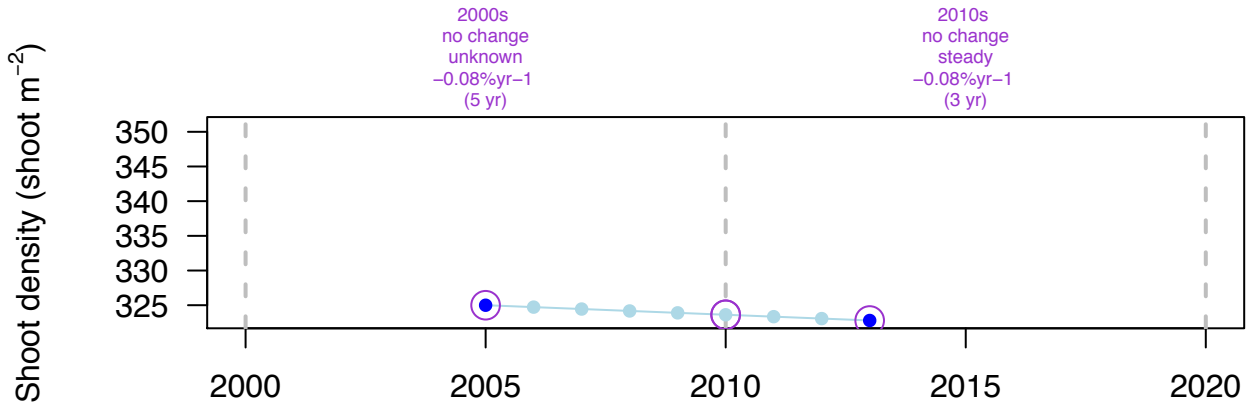

359\_lowerlimit

Pergent et al. 2015

SITE: Favone (Corsica) (France – Mediterranean) – Po (-36.9 m)

OVERALL: Net = 0 m; Rate = 0 % yr<sup>-1</sup>; Perc Final = 100 % > no change

DECADAL: YES (8 yr)

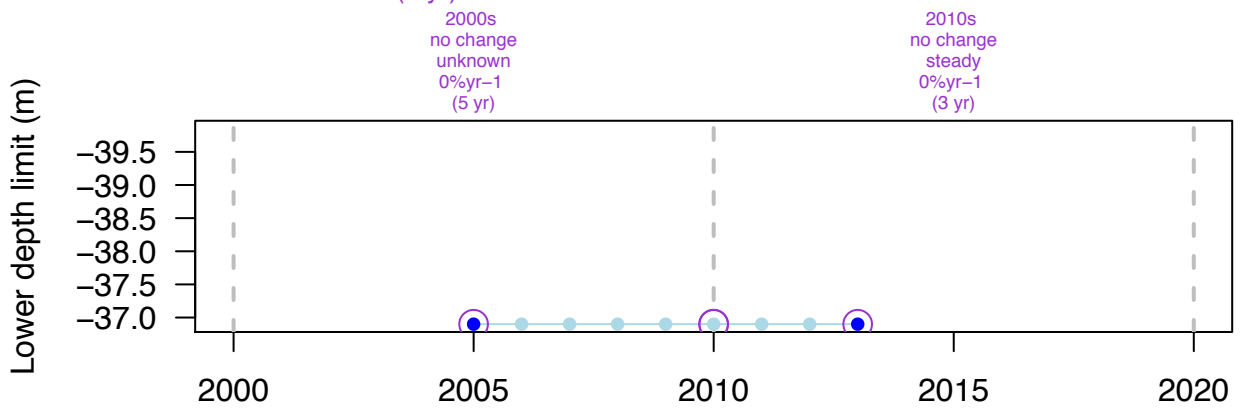

360\_cover

Pergent et al. 2015

SITE: La Chiappa (Corsica) (France – Mediterranean) – Po (-35.3 m)

OVERALL: Net = -5.2 %; Rate = -4.35 % yr<sup>-1</sup>; Perc Final = 71 % > decrease

DECADAL: YES (8 yr)

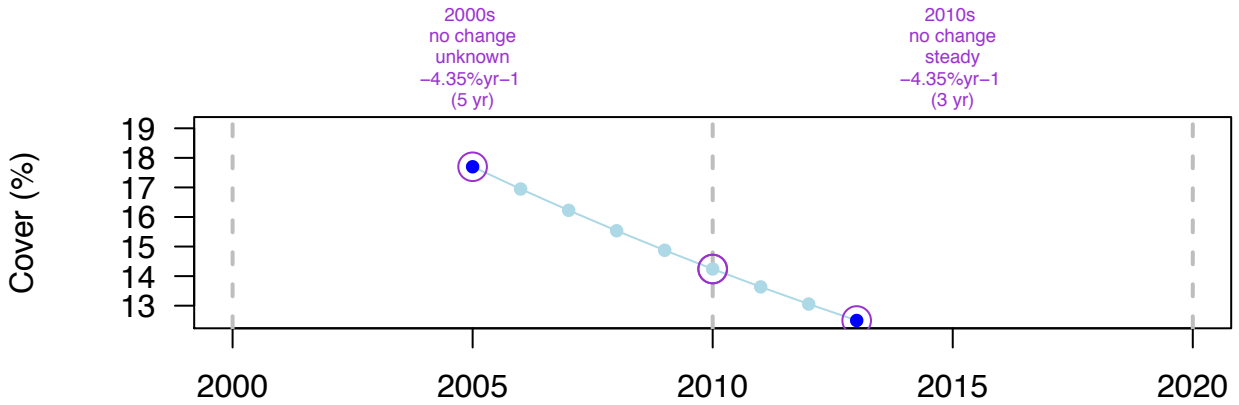

360\_density

Pergent et al. 2015

SITE: La Chiappa (Corsica) (France – Mediterranean) – Po (-35.3 m)

OVERALL: Net = 14 shoot m<sup>-2</sup>; Rate = 0.56 % yr<sup>-1</sup>; Perc Final = 105 % > no change

DECADAL: YES (8 yr)

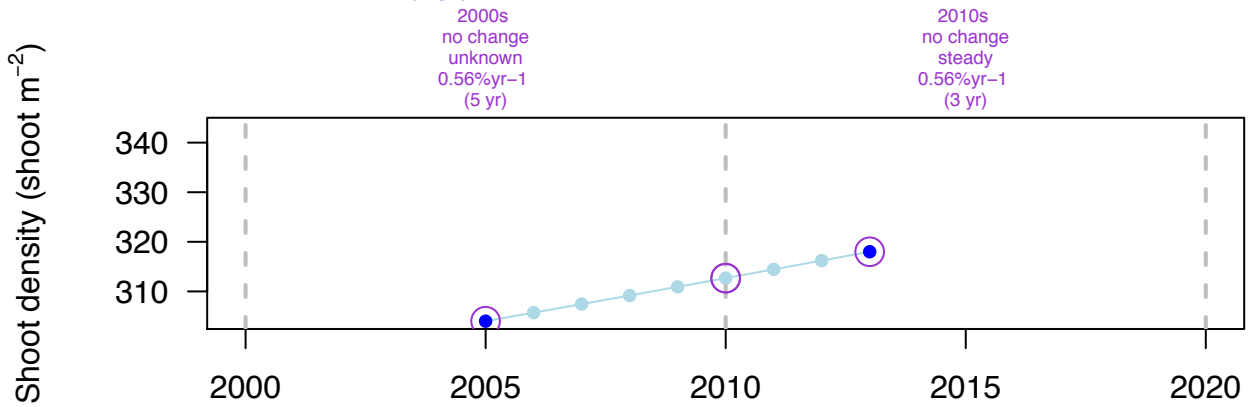



360\_lowerlimit

Pergent et al. 2015

SITE: La Chiappa (Corsica) (France – Mediterranean) – Po (-35.3 m)

OVERALL: Net = 0 m; Rate = 0 % yr<sup>-1</sup>; Perc Final = 100 % > no change

DECADAL: YES (8 yr)

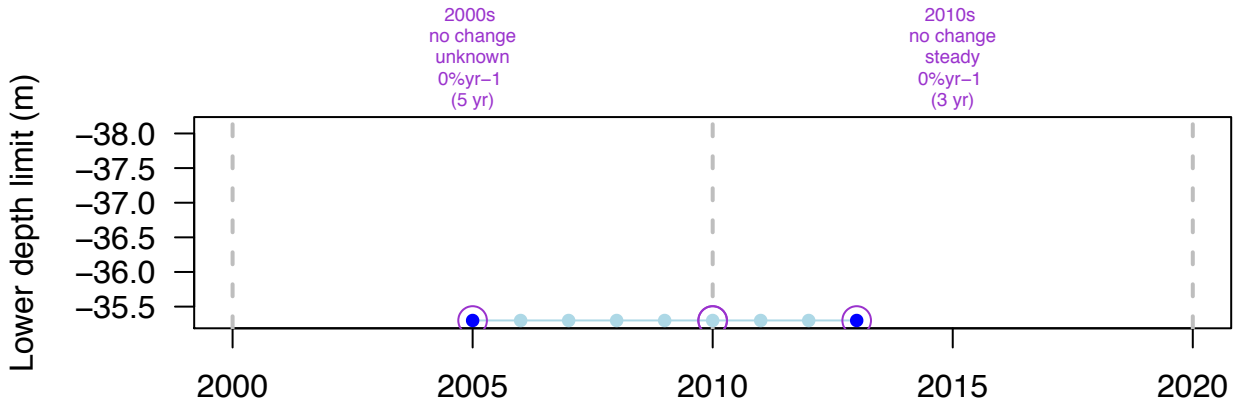

361\_cover

Pergent et al. 2015

SITE: Lavezzi (Corsica) (France – Mediterranean) – Po (-30.3 m)

OVERALL: Net = -22.3 %; Rate = -5.13 % yr<sup>-1</sup>; Perc Final = 66 % > decrease

DECADAL: YES (8 yr)

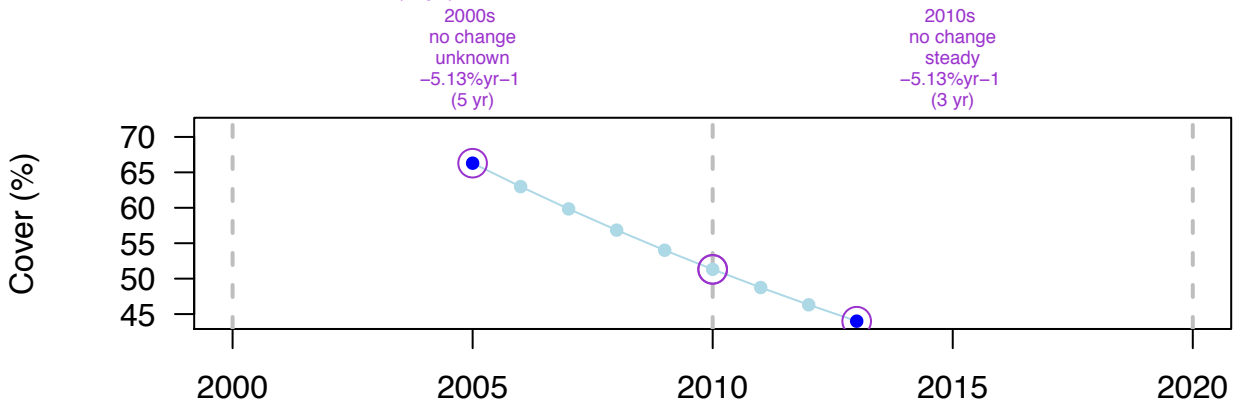

361\_density

Pergent et al. 2015

SITE: Lavezzi (Corsica) (France – Mediterranean) – Po (-30.3 m)

OVERALL: Net = 72.3 shoot m<sup>-2</sup>; Rate = 4.45 % yr<sup>-1</sup>; Perc Final = 143 % > increase

DECADAL: YES (8 yr)

Shoot density (shoot m<sup>-2</sup>)

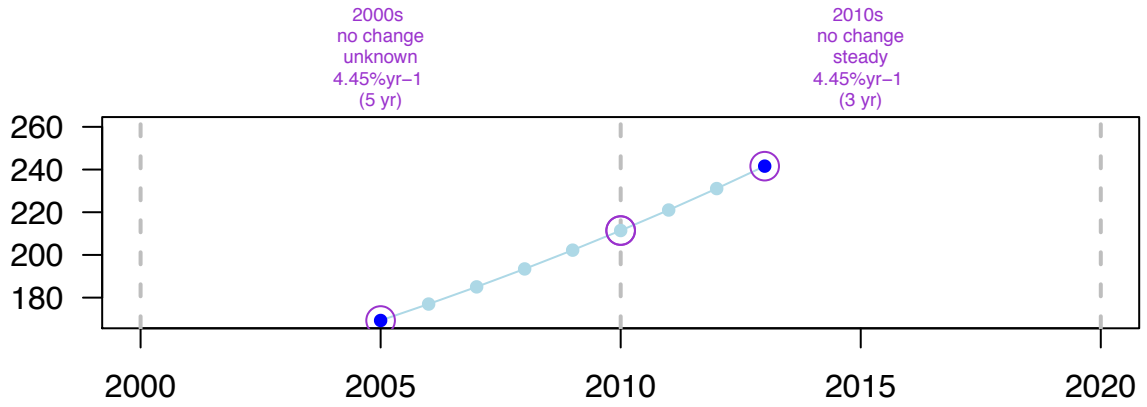

361\_lowerlimit

Pergent et al. 2015

SITE: Lavezzi (Corsica) (France – Mediterranean) – Po (-30.3 m)

OVERALL: Net = 0 m; Rate = 0 % yr<sup>-1</sup>; Perc Final = 100 % > no change

DECADAL: YES (8 yr)

Lower depth limit (m)

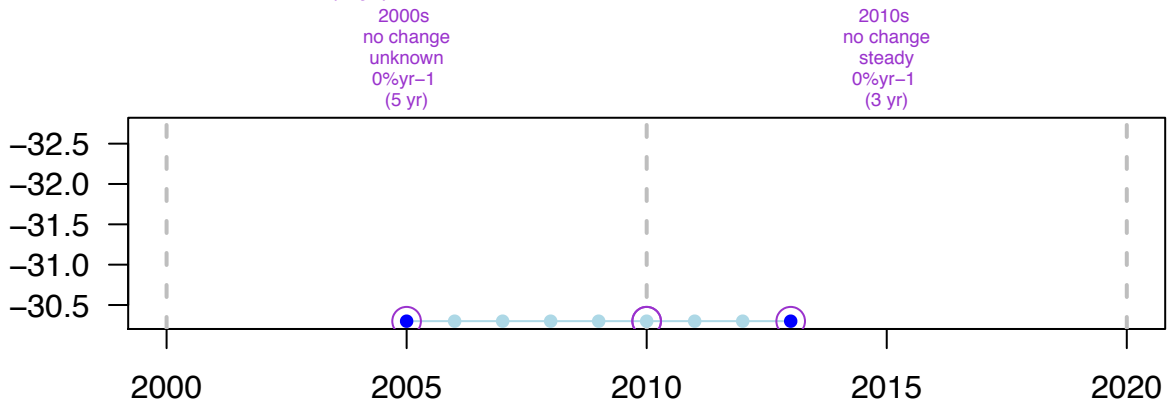

362\_cover

Pergent et al. 2015

SITE: Porto Polo (Corsica) (France – Mediterranean) – Po (-36.5 m)

OVERALL: Net = -27.2 %; Rate = -23.71 % yr<sup>-1</sup>; Perc Final = 15 % > decrease

DECADAL: YES (8 yr)

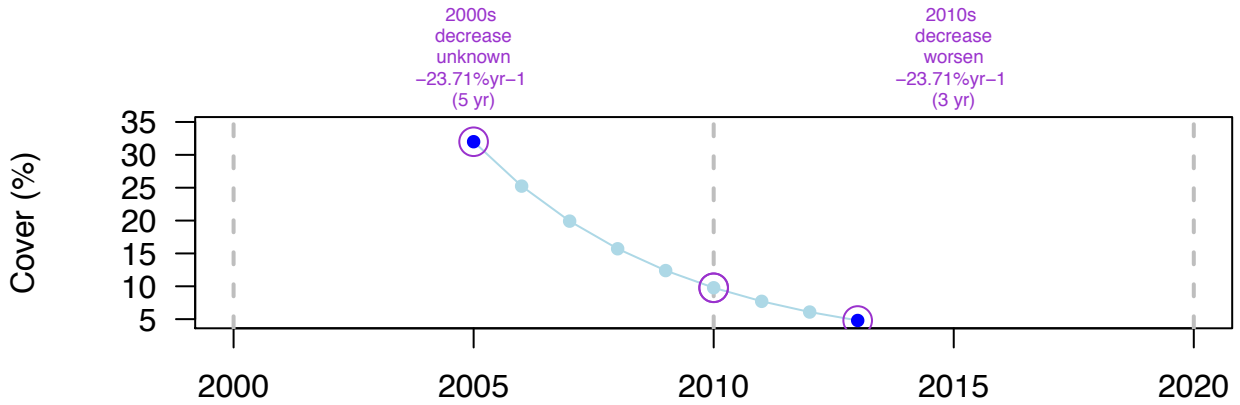

362\_density

Pergent et al. 2015

SITE: Porto Polo (Corsica) (France – Mediterranean) – Po (-36.5 m)

OVERALL: Net = 94.9 shoot m<sup>-2</sup>; Rate = 3.94 % yr<sup>-1</sup>; Perc Final = 137 % > increase

DECADAL: YES (8 yr)

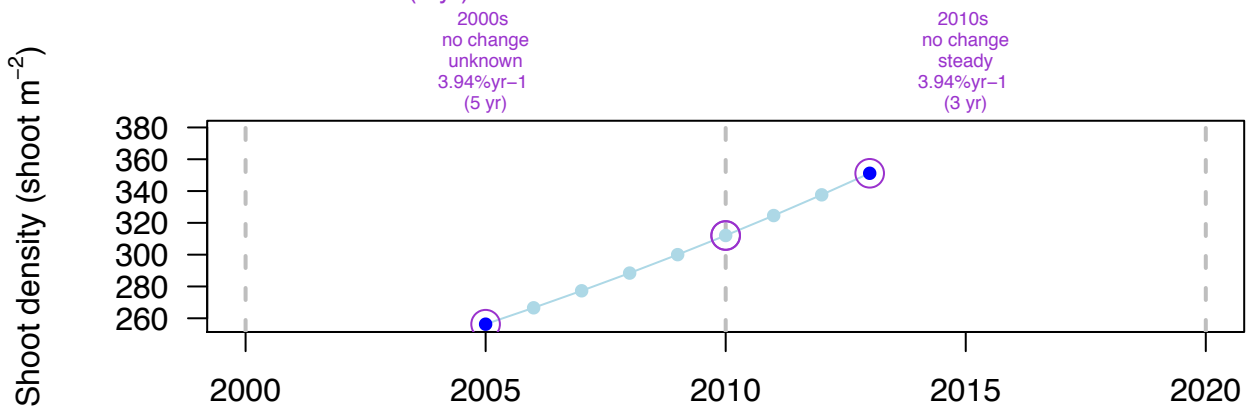

362\_lowerlimit

Pergent et al. 2015

SITE: Porto Polo (Corsica) (France – Mediterranean) – Po (-36.5 m)

OVERALL: Net = -4.3 m; Rate = -1.57 % yr<sup>-1</sup>; Perc Final = 88 % > decrease

DECADAL: YES (8 yr)

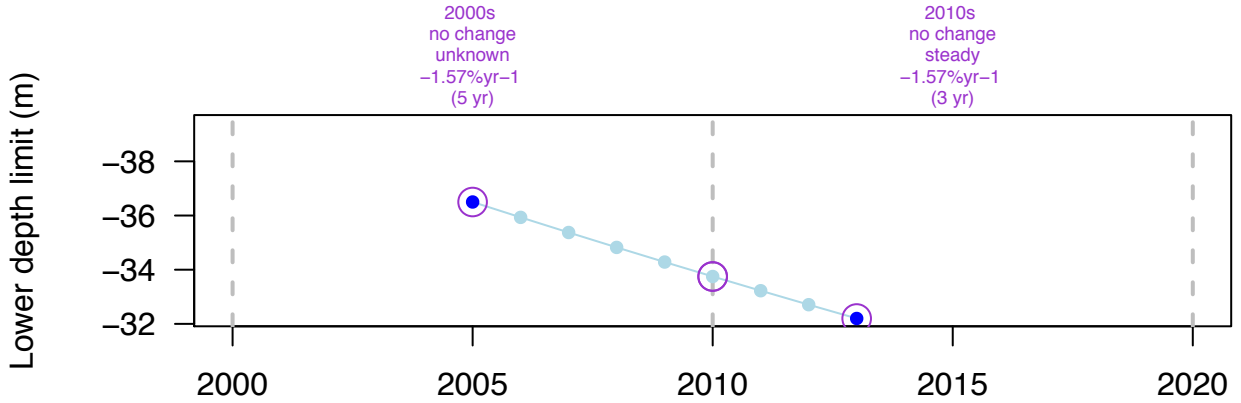

363\_cover

Pergent et al. 2015

SITE: La Parata (Corsica) (France – Mediterranean) – Po (-35.3 m)

OVERALL: Net = -9.1 %; Rate = -28.91 % yr<sup>-1</sup>; Perc Final = 10 % > decrease

DECADAL: YES (8 yr)

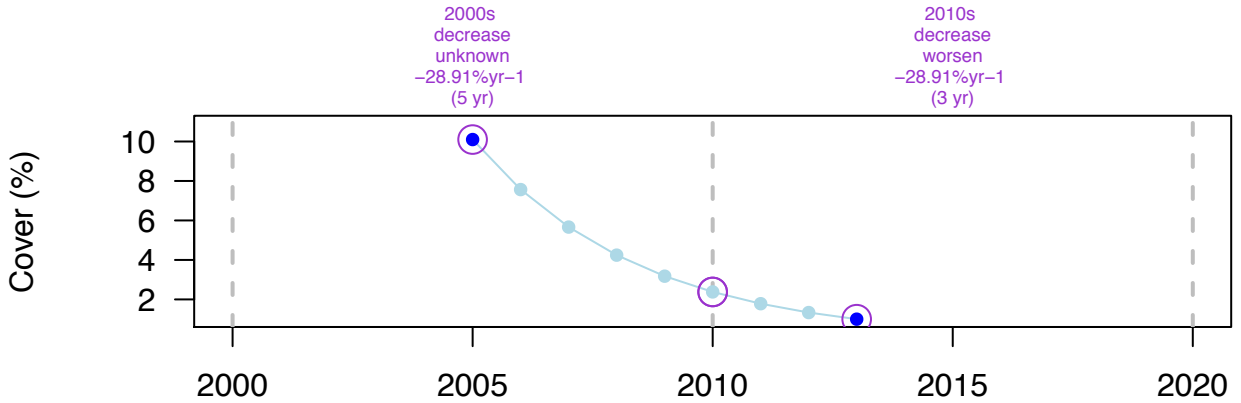

363\_density

Pergent et al. 2015

SITE: La Parata (Corsica) (France – Mediterranean) – Po (-35.3 m)

OVERALL: Net = 35.5 shoot m<sup>-2</sup>; Rate = 2.3 % yr<sup>-1</sup>; Perc Final = 120 % > no change

DECADAL: YES (8 yr)

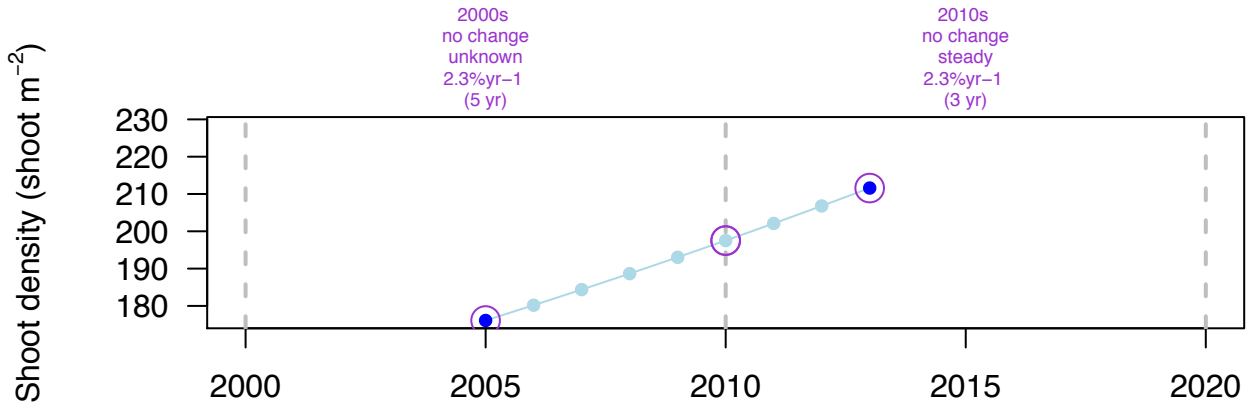

363\_lowerlimit

Pergent et al. 2015

SITE: La Parata (Corsica) (France – Mediterranean) – Po (-35.3 m)

OVERALL: Net = 0 m; Rate = 0 % yr<sup>-1</sup>; Perc Final = 100 % > no change

DECADAL: YES (8 yr)

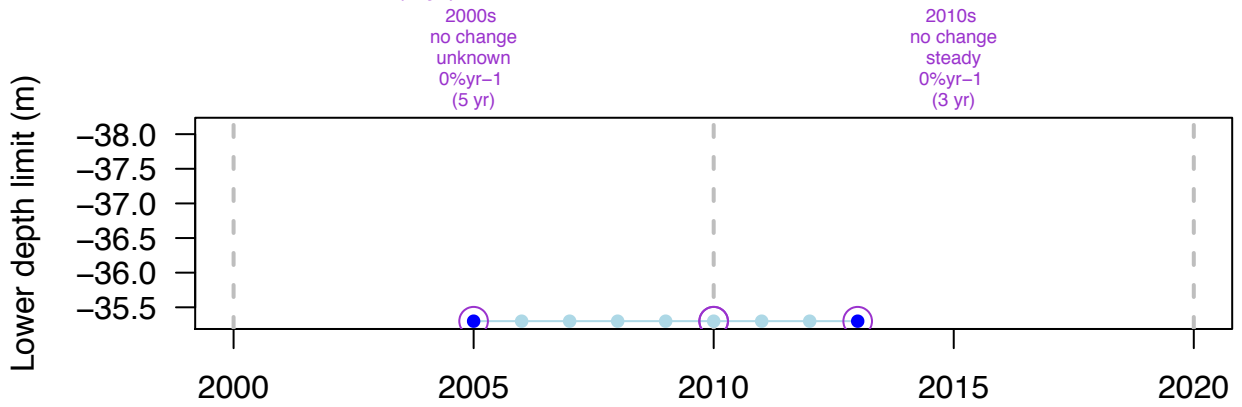

364\_cover

Pergent et al. 2015

SITE: Sagone (Corsica) (France – Mediterranean) – Po (-33.2 m)

OVERALL: Net = 8.7 %; Rate = 4.73 % yr<sup>-1</sup>; Perc Final = 133 % > increase

DECADAL: NO (6 yr)

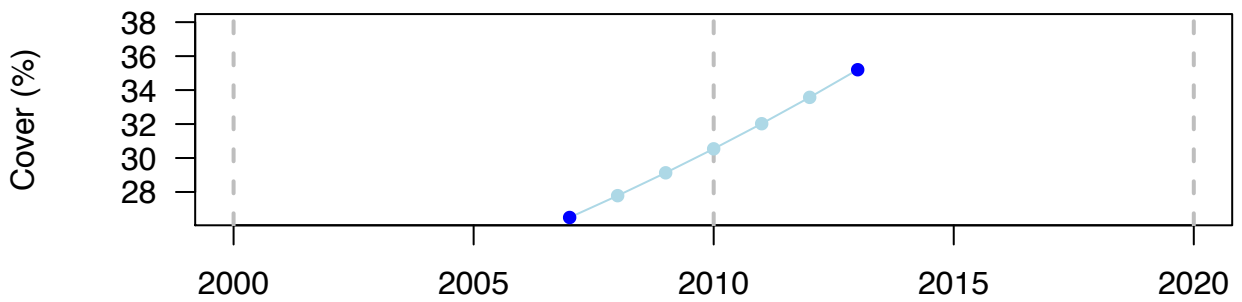

364\_density

Pergent et al. 2015

SITE: Sagone (Corsica) (France – Mediterranean) – Po (-33.2 m)

OVERALL: Net = -24.4 shoot m<sup>-2</sup>; Rate = -0.88 % yr<sup>-1</sup>; Perc Final = 95 % > no change

DECADAL: NO (6 yr)

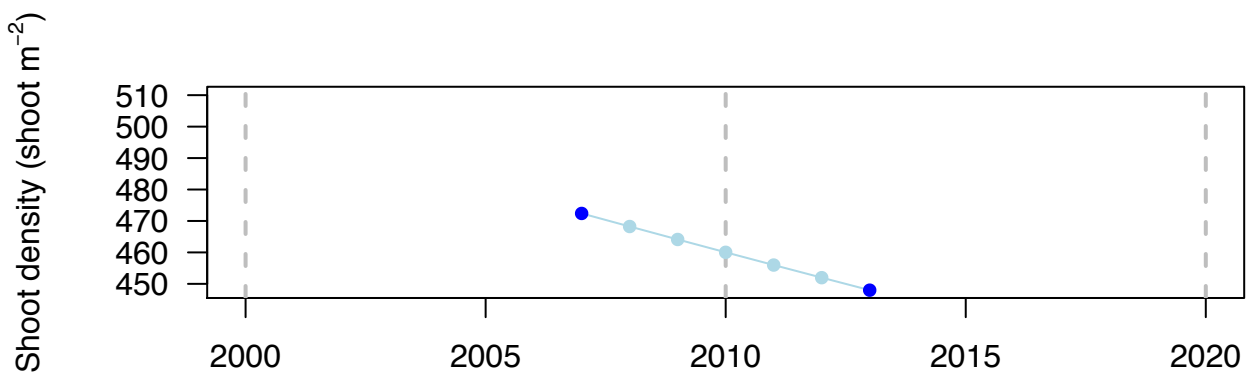

364\_lowerlimit

Pergent et al. 2015

SITE: Sagone (Corsica) (France – Mediterranean) – Po (-33.2 m)

OVERALL: Net = 0 m; Rate = 0 % yr<sup>-1</sup>; Perc Final = 100 % > no change

DECADAL: NO (6 yr)

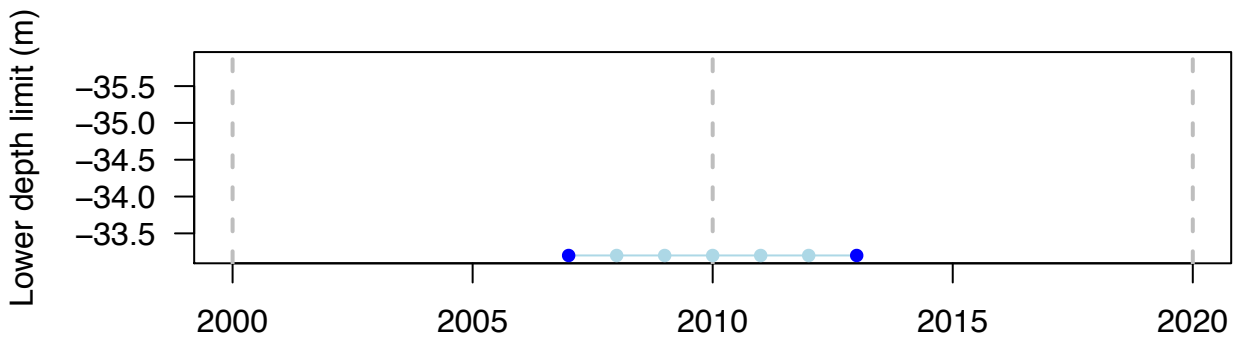

365\_cover

Pergent et al. 2015

SITE: Porto (Corsica) (France – Mediterranean) – Po (-36.5 m)

OVERALL: Net = 3.4 %; Rate = 2.6 % yr<sup>-1</sup>; Perc Final = 117 % > no change

DECADAL: NO (6 yr)

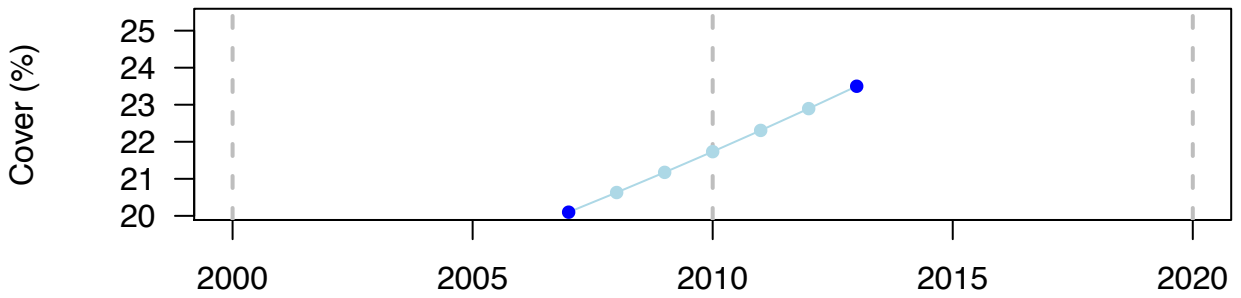

365\_density

Pergent et al. 2015

SITE: Porto (Corsica) (France – Mediterranean) – Po (-36.5 m)

OVERALL: Net = -40 shoot m<sup>-2</sup>; Rate = -2.1 % yr<sup>-1</sup>; Perc Final = 88 % > no change

DECADAL: NO (6 yr)

Shoot density (shoot m<sup>-2</sup>)

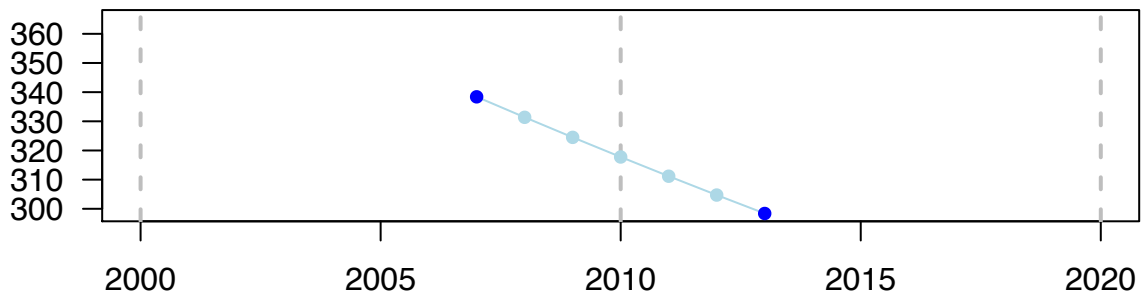

365\_lowerlimit

Pergent et al. 2015

SITE: Porto (Corsica) (France – Mediterranean) – Po (-36.5 m)

OVERALL: Net = 0 m; Rate = 0 % yr<sup>-1</sup>; Perc Final = 100 % > no change

DECADAL: NO (6 yr)

Lower depth limit (m)

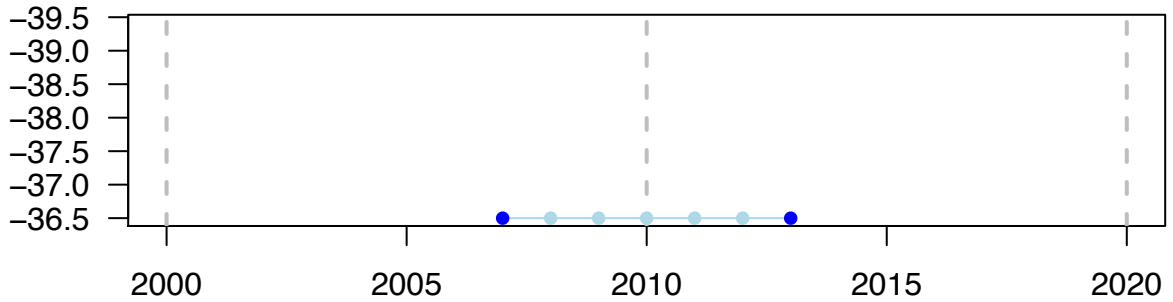



366\_cover

Pergent et al. 2015

SITE: Stareso (Corsica) (France – Mediterranean) – Po (-38.6 m)

OVERALL: Net = -8.4 %; Rate = -5.18 % yr<sup>-1</sup>; Perc Final = 70 % > decrease

DECADAL: NO (7 yr)

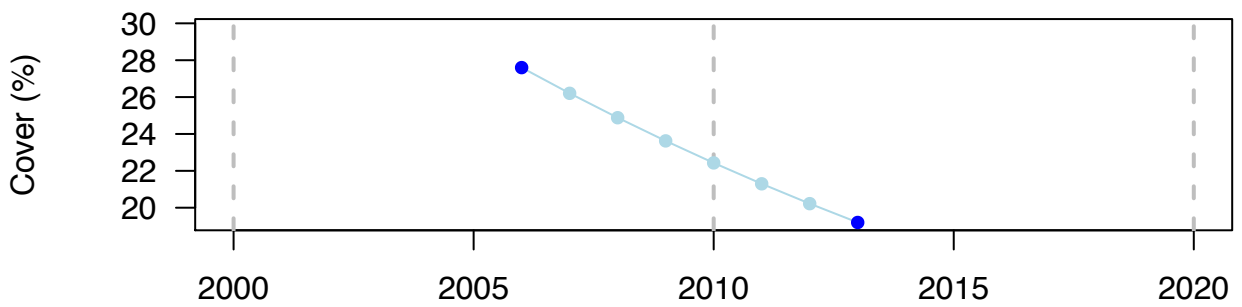

366\_density

Pergent et al. 2015

SITE: Stareso (Corsica) (France – Mediterranean) – Po (-38.6 m)

OVERALL: Net = -69.6 shoot m<sup>-2</sup>; Rate = -3.63 % yr<sup>-1</sup>; Perc Final = 78 % > no change

DECADAL: NO (7 yr)

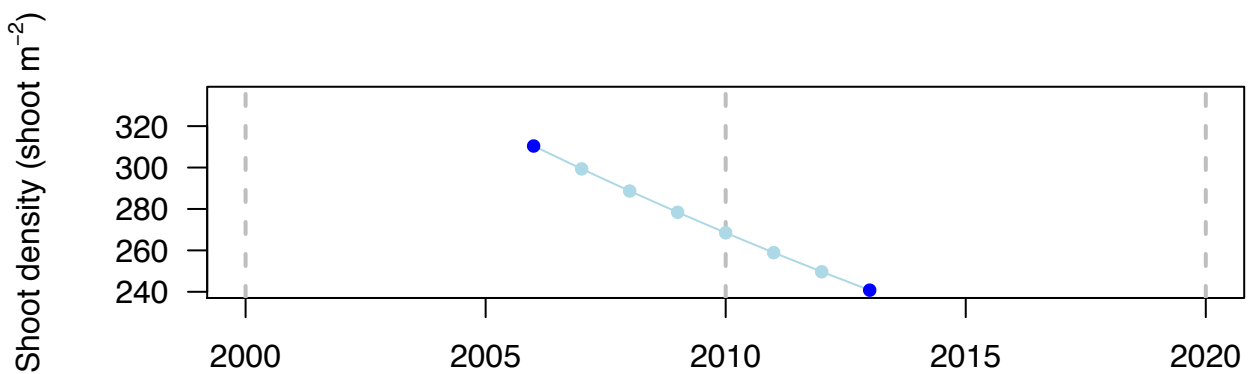

366\_lowerlimit

Pergent et al. 2015

SITE: Stareso (Corsica) (France – Mediterranean) – Po (-38.6 m)

OVERALL: Net = 0 m; Rate = 0 % yr<sup>-1</sup>; Perc Final = 100 % > no change

DECADAL: NO (7 yr)

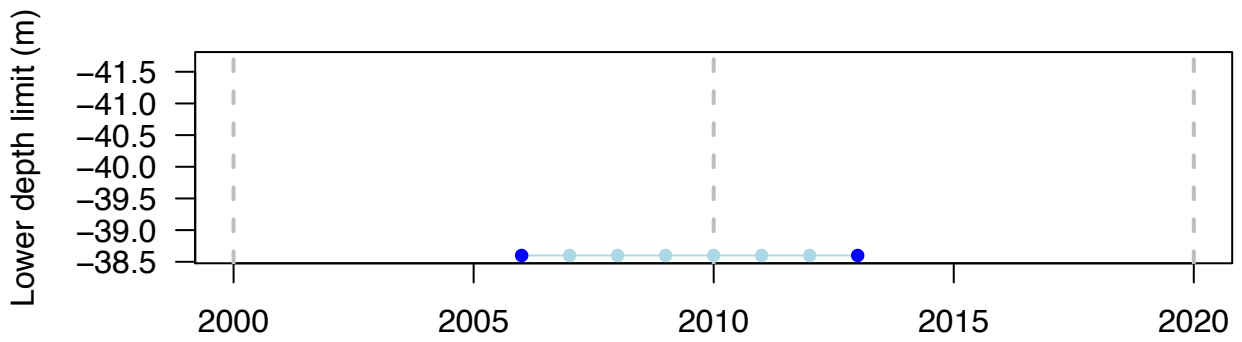

367\_cover

Pergent et al. 2015

SITE: L'Île Rousse (Corsica) (France – Mediterranean) – Po (-35.8 m)

OVERALL: Net = -11 %; Rate = -6.61 % yr<sup>-1</sup>; Perc Final = 67 % > decrease

DECADAL: NO (6 yr)

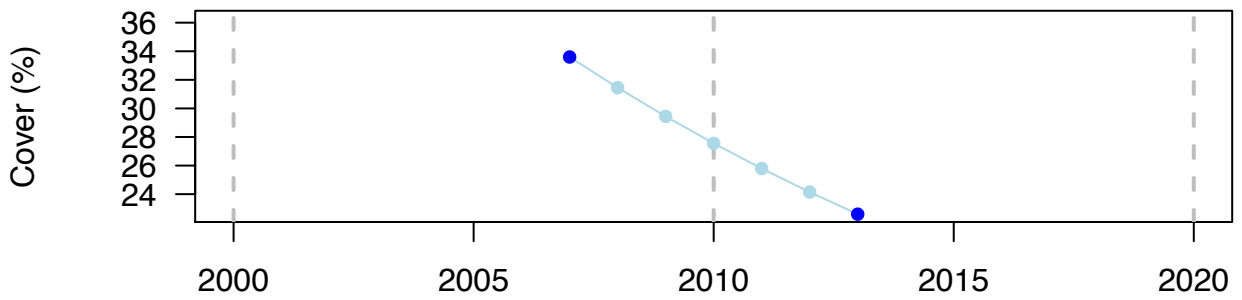

367\_density

Pergent et al. 2015

SITE: L'Île Rousse (Corsica) (France – Mediterranean) – Po (-35.8 m)

OVERALL: Net = 50.1 shoot m<sup>-2</sup>; Rate = 3.59 % yr<sup>-1</sup>; Perc Final = 124 % > no change

DECADAL: NO (6 yr)

Shoot density (shoot m<sup>-2</sup>)

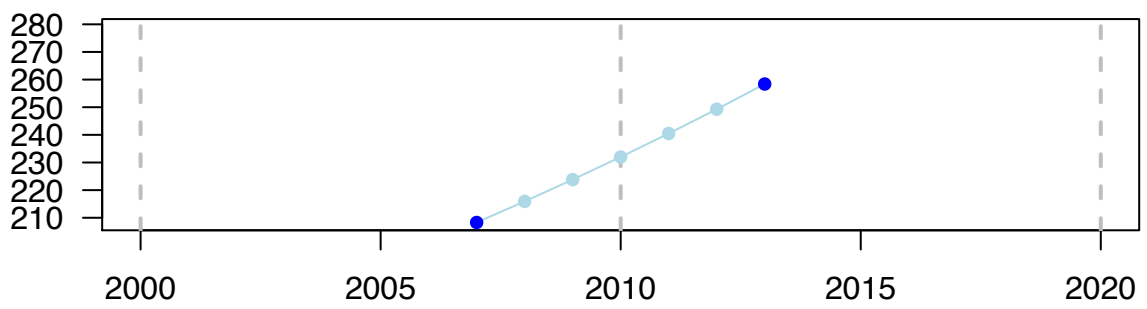

367\_lowerlimit

Pergent et al. 2015

SITE: L'Île Rousse (Corsica) (France – Mediterranean) – Po (-35.8 m)

OVERALL: Net = 0 m; Rate = 0 % yr<sup>-1</sup>; Perc Final = 100 % > no change

DECADAL: NO (6 yr)

Lower depth limit (m)

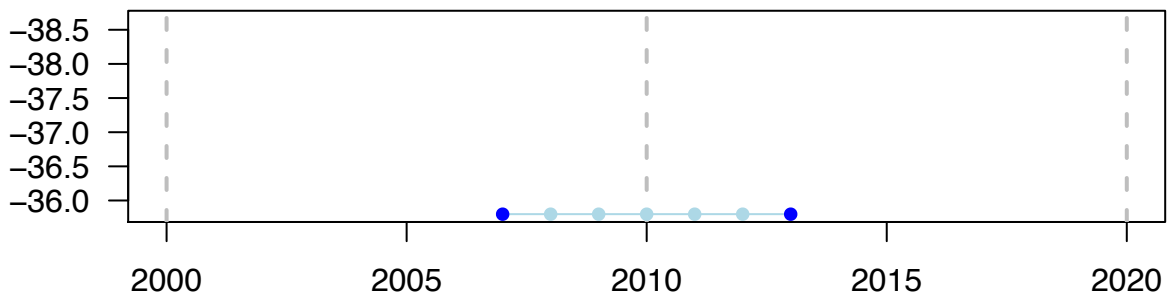

368\_cover

Pergent et al. 2015

SITE: Canari (Corsica) (France – Mediterranean) – Po (-27.4 m)

OVERALL: Net = 10.5 %; Rate = 1.9 % yr<sup>-1</sup>; Perc Final = 112 % > no change

DECADAL: NO (6 yr)

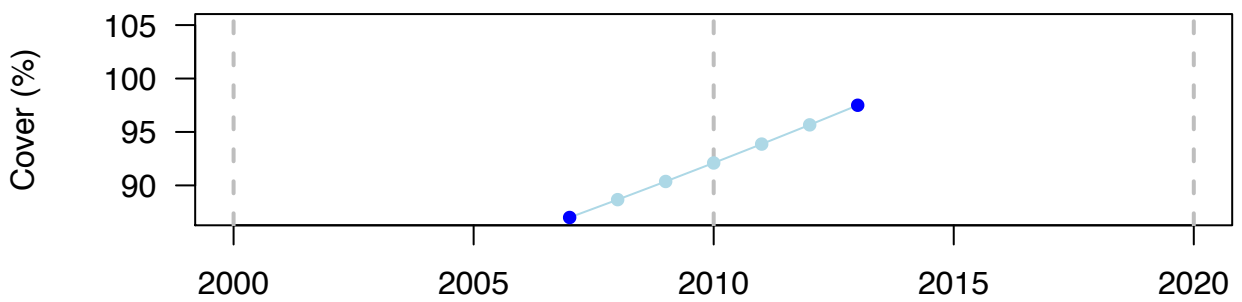

368\_density

Pergent et al. 2015

SITE: Canari (Corsica) (France – Mediterranean) – Po (-27.4 m)

OVERALL: Net = 96.6 shoot m<sup>-2</sup>; Rate = 4.94 % yr<sup>-1</sup>; Perc Final = 134 % > increase

DECADAL: NO (6 yr)

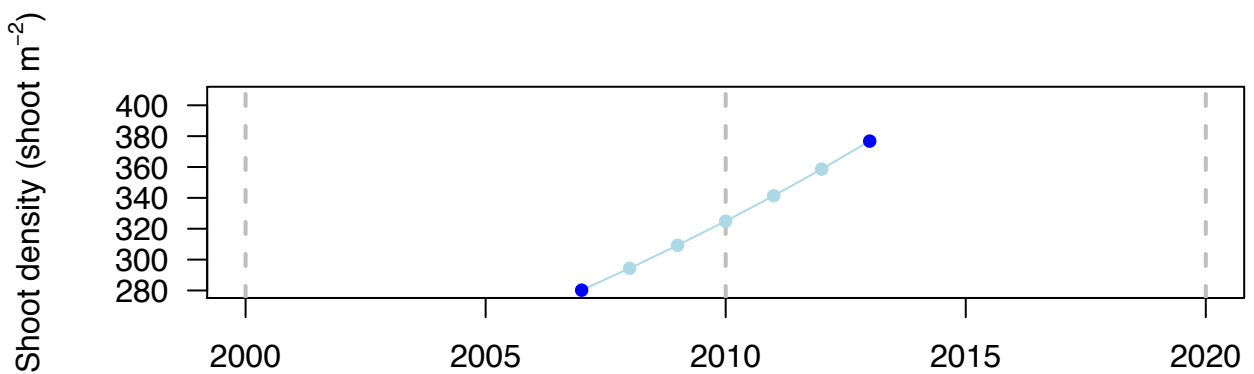

368\_lowerlimit

Pergent et al. 2015

SITE: Canari (Corsica) (France – Mediterranean) – Po (-27.4 m)

OVERALL: Net = 0 m; Rate = 0 % yr<sup>-1</sup>; Perc Final = 100 % > no change

DECADAL: NO (6 yr)

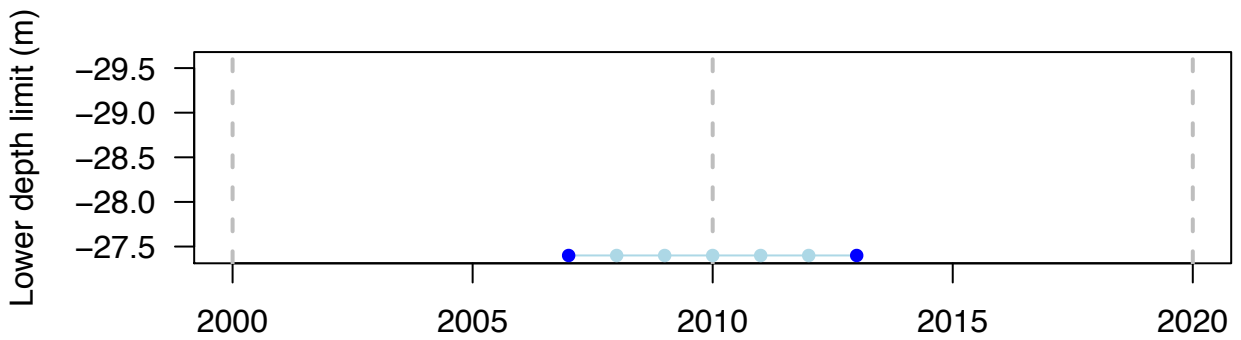

370\_area

Cunha et al. 2005

SITE: Ancão Inlet (Portugal – Atlantic) – Zn (0 m)

OVERALL: Net = 13.6 ha; Rate = 1.84 % yr<sup>-1</sup>; Perc Final = 292 % > increase

DECADAL: YES (58 yr)

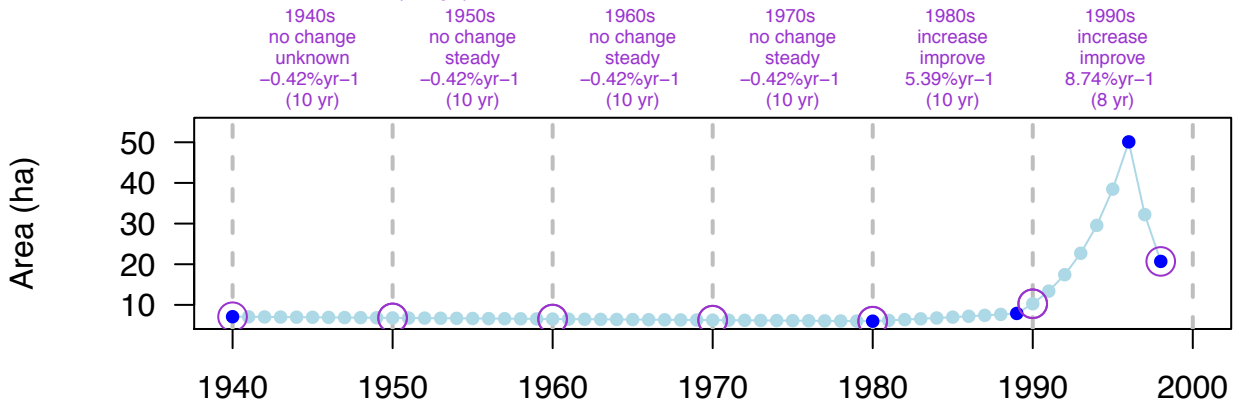

1940s  
no change  
unknown  
-0.42%yr<sup>-1</sup>  
(10 yr)

1950s  
no change  
steady  
-0.42%yr<sup>-1</sup>  
(10 yr)

1960s  
no change  
steady  
-0.42%yr<sup>-1</sup>  
(10 yr)

1970s  
no change  
steady  
-0.42%yr<sup>-1</sup>  
(10 yr)

1980s  
increase  
improve  
5.39%yr<sup>-1</sup>  
(10 yr)

1990s  
increase  
improve  
8.74%yr<sup>-1</sup>  
(8 yr)

### 371\_area

da Silva et al. 2004, Cunha et al. 2013, Azevedo et al. 2013

SITE: Canal de Ovar (Portugal – Atlantic) – Zn (? m)

OVERALL: Net = -756.9 ha; Rate = -11.23 % yr<sup>-1</sup>; Perc Final = 5 % > decrease

DECADAL: YES (26 yr)

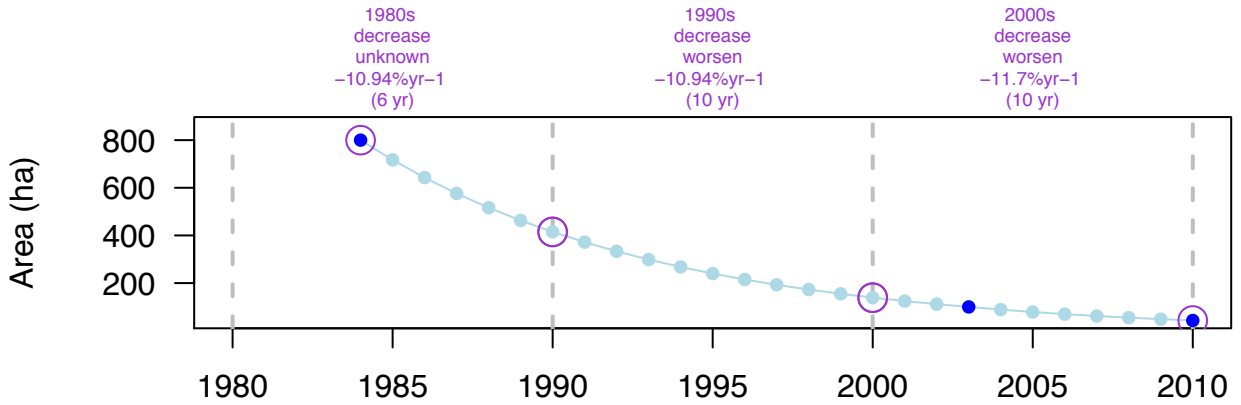

### 371\_biomass

da Silva et al. 2004, Cunha et al. 2013, Azevedo et al. 2013

SITE: Canal de Ovar (Portugal – Atlantic) – Zn (? m)

OVERALL: Net = -250 g dw m<sup>-2</sup>; Rate = -4.27 % yr<sup>-1</sup>; Perc Final = 44 % > decrease

DECADAL: YES (19 yr)

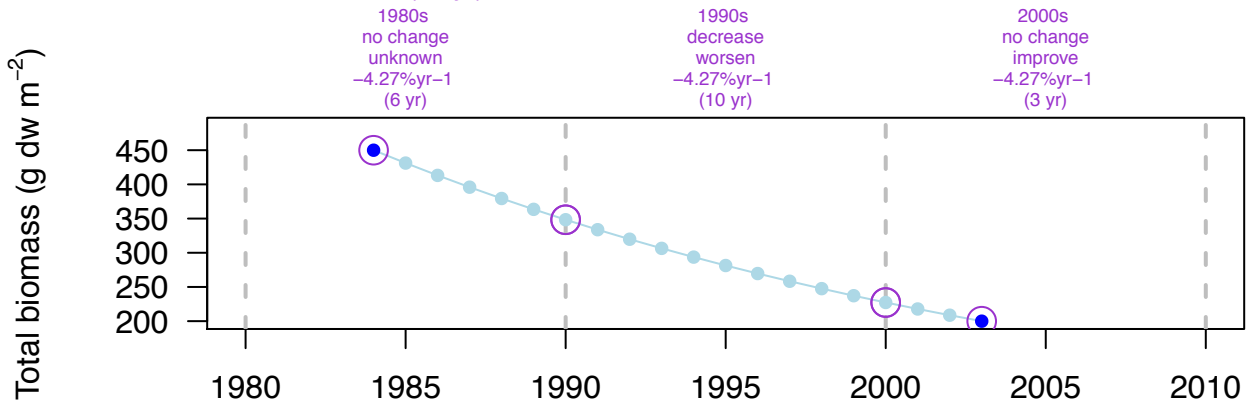

372\_area

Cunha et al. 2013

SITE: Mira River (Portugal – Atlantic) – Zn (? m)

OVERALL: Net = -72.5 ha; Rate = -9.47 % yr<sup>-1</sup>; Perc Final = 9 % > decrease

DECADAL: YES (25 yr)

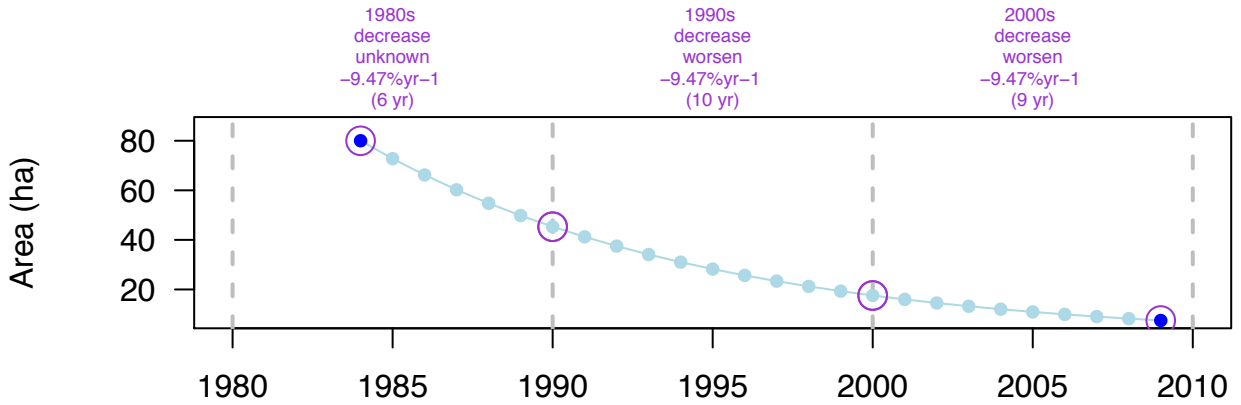

373\_area

Cunha et al. 2013

SITE: Ria de Alvor (Portugal – Atlantic) – Zn (? m)

OVERALL: Net = -1.96 ha; Rate = NA % yr<sup>-1</sup>; Perc Final = NA % > decrease

DECADAL: YES (37 yr)

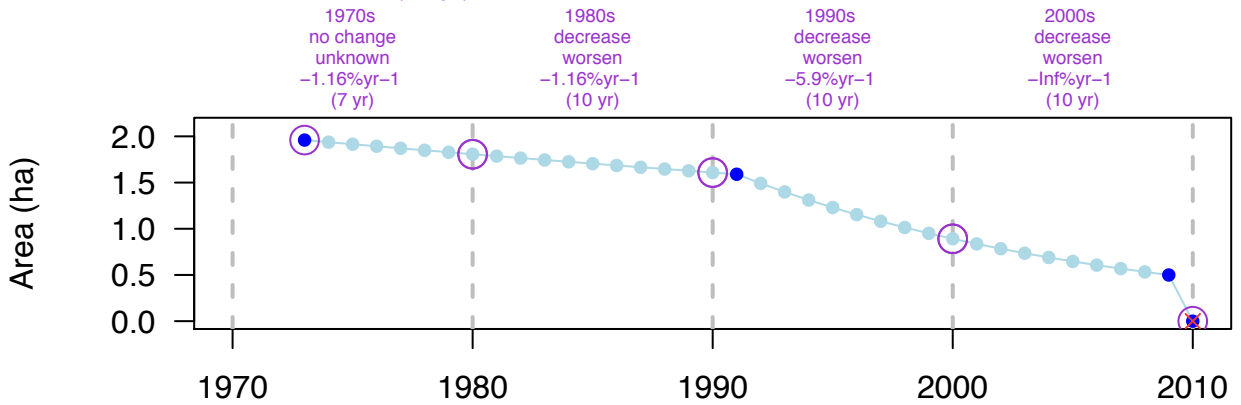

374\_area

Cunha et al. 2013

SITE: Arade River (Portugal – Atlantic) – Zn (? m)

OVERALL: Net = -1.4 ha; Rate = -30.08 % yr<sup>-1</sup>; Perc Final = 22 % > decrease

DECADAL: NO (5 yr)

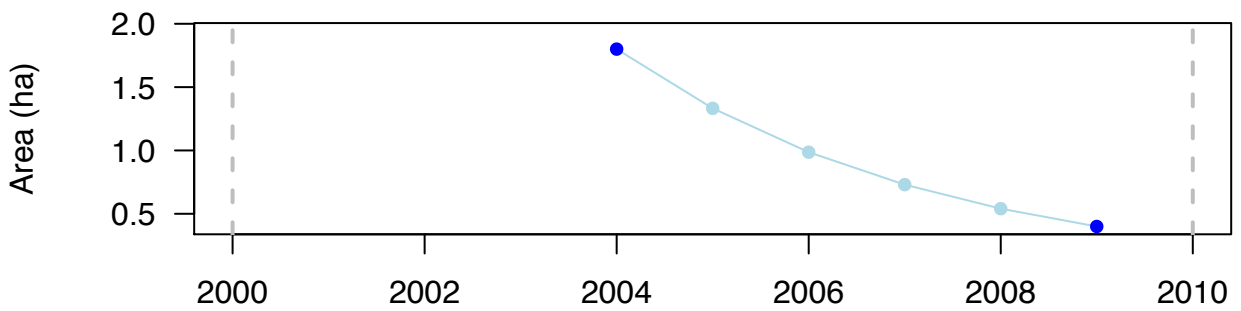

375\_area

Cunha et al. 2013

SITE: Óbidos Lagoon (Portugal – Atlantic) – Zm (? m)

OVERALL: Net = -148.95 ha; Rate = -9.92 % yr<sup>-1</sup>; Perc Final = 1 % > decrease

DECADAL: YES (50 yr)

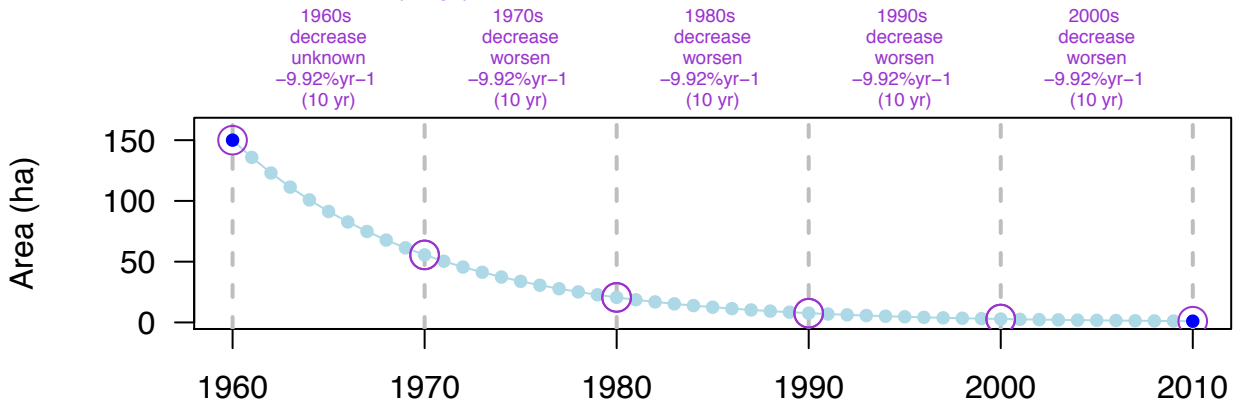



376\_area

Cunha et al. 2013

SITE: Costa da Galé (Portugal – Atlantic) – Zm (? m)

OVERALL: Net = 0 ha; Rate = NA % yr<sup>-1</sup>; Perc Final = NA % > decrease

DECADAL: NO (4 yr)

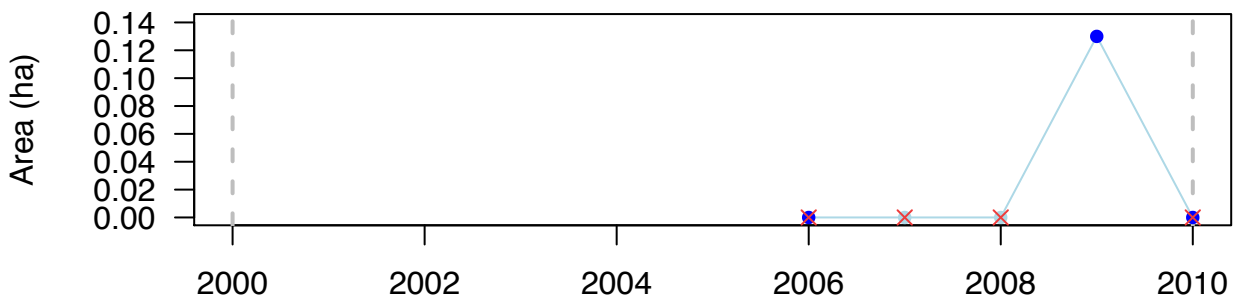

377\_area

Cunha et al. 2013

SITE: Mira River (Portugal – Atlantic) – Zm (? m)

OVERALL: Net = -0.4 ha; Rate = NA % yr<sup>-1</sup>; Perc Final = NA % > decrease

DECADAL: YES (25 yr)

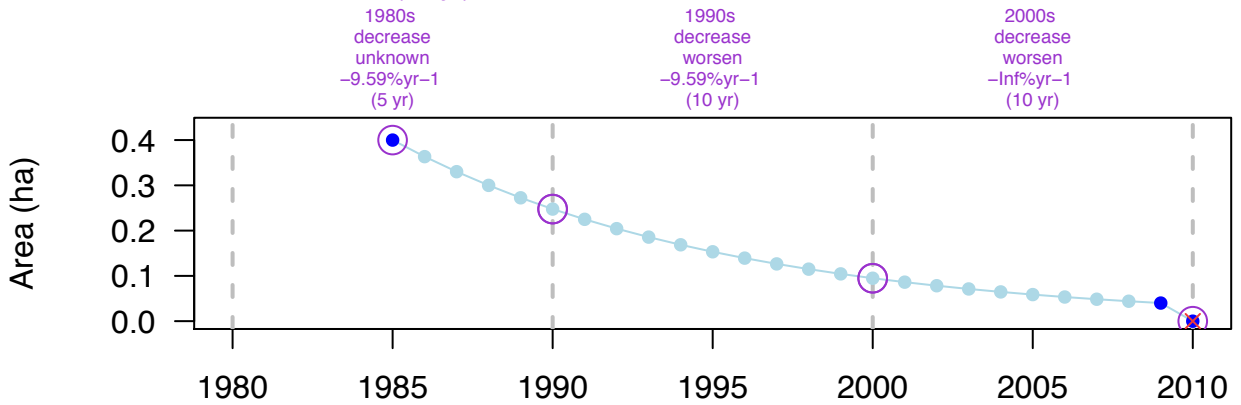

378\_area

Cunha et al. 2013

SITE: Portinho da Arrábida (Portugal – Atlantic) – Zm (? m)

OVERALL: Net = -10 ha; Rate = NA % yr<sup>-1</sup>; Perc Final = NA % > decrease

DECADAL: YES (61 yr)

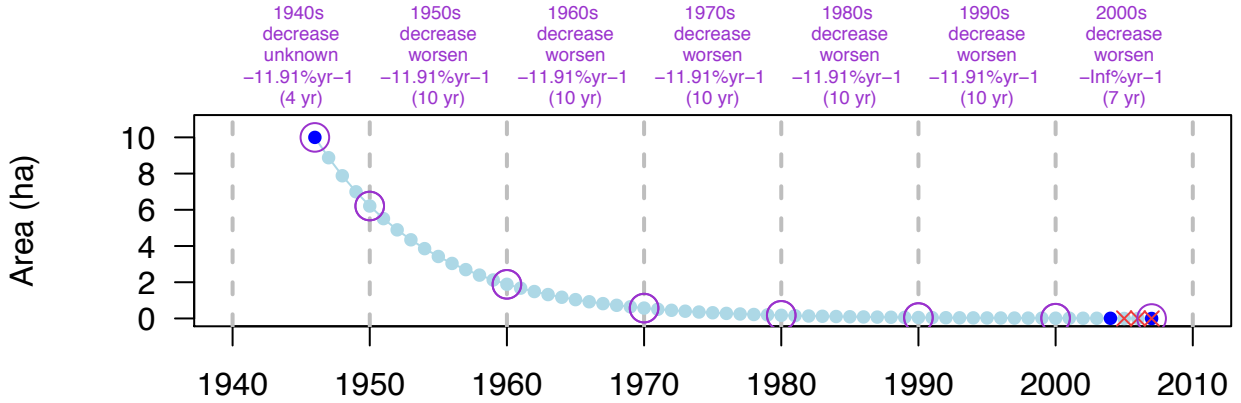

379\_area

Cunha et al. 2013

SITE: Ponta do Adoche (Portugal – Atlantic) – Zm (? m)

OVERALL: Net = -1.21 ha; Rate = NA % yr<sup>-1</sup>; Perc Final = NA % > decrease

DECADAL: NO (1 yr)

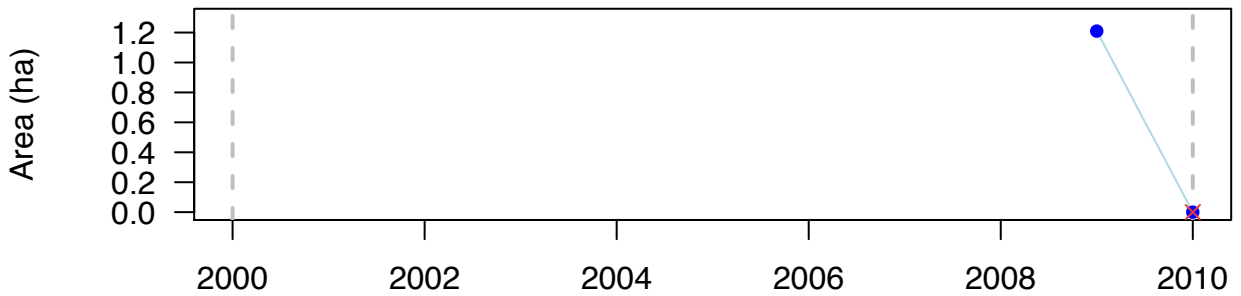

381\_biomass

Cabaço et al. 2010, Cabaço and Santos 2014, Cabaço and Santos (unpublished)

SITE: Ancão Peninsula (meadow A) (Portugal – Atlantic) – Cn (? m)

OVERALL: Net = -399.52 g dw m<sup>-2</sup>; Rate = NA % yr<sup>-1</sup>; Perc Final = NA % > decrease

DECADAL: YES (10 yr)

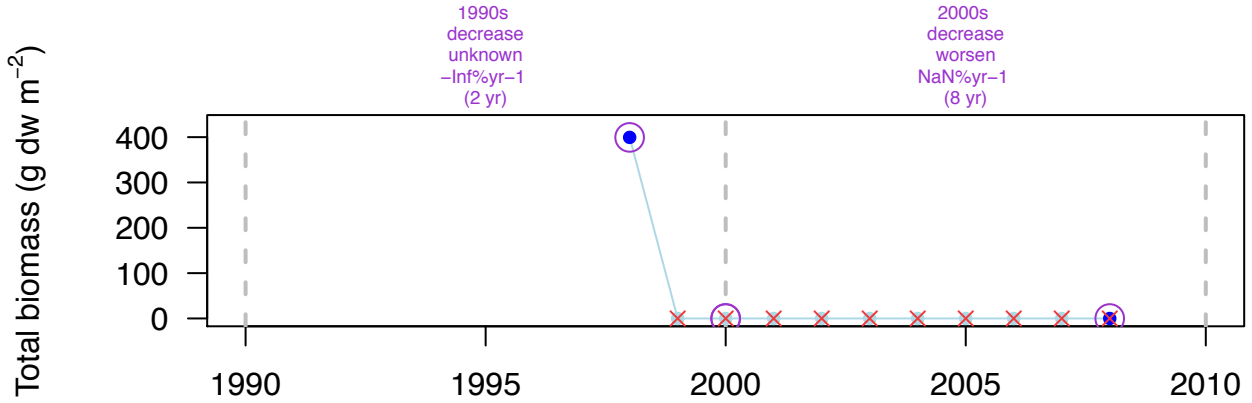

381\_density

Cabaço et al. 2010, Cabaço and Santos 2014, Cabaço and Santos (unpublished)

SITE: Ancão Peninsula (meadow A) (Portugal – Atlantic) – Cn (? m)

OVERALL: Net = -716.56 shoot m<sup>-2</sup>; Rate = NA % yr<sup>-1</sup>; Perc Final = NA % > decrease

DECADAL: YES (10 yr)

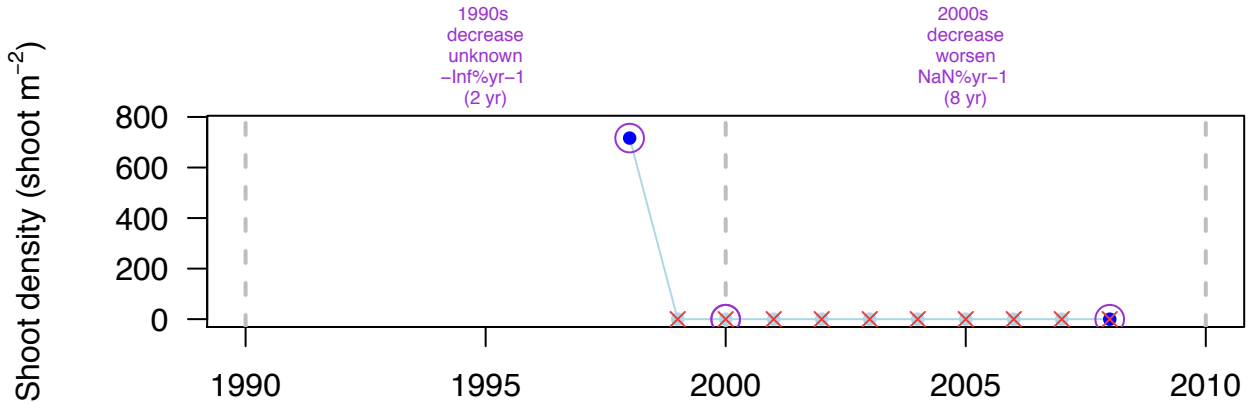

### 382\_biomass

Cabaço et al. 2010, Cabaço and Santos 2014, Cabaço and Santos (unpublished)

SITE: Ancão Peninsula (meadow B) (Portugal – Atlantic) – Cn (? m)

OVERALL: Net =  $-186.35 \text{ g dw m}^{-2}$ ; Rate = NA % yr $^{-1}$ ; Perc Final = NA % > decrease

DECADAL: YES (10 yr)

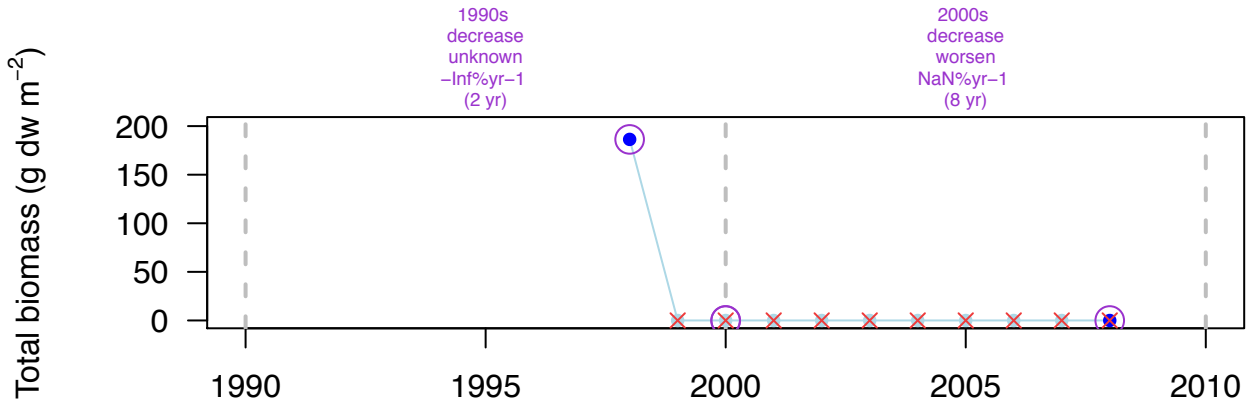

### 382\_density

Cabaço et al. 2010, Cabaço and Santos 2014, Cabaço and Santos (unpublished)

SITE: Ancão Peninsula (meadow B) (Portugal – Atlantic) – Cn (? m)

OVERALL: Net =  $-573.25 \text{ shoot m}^{-2}$ ; Rate = NA % yr $^{-1}$ ; Perc Final = NA % > decrease

DECADAL: YES (10 yr)

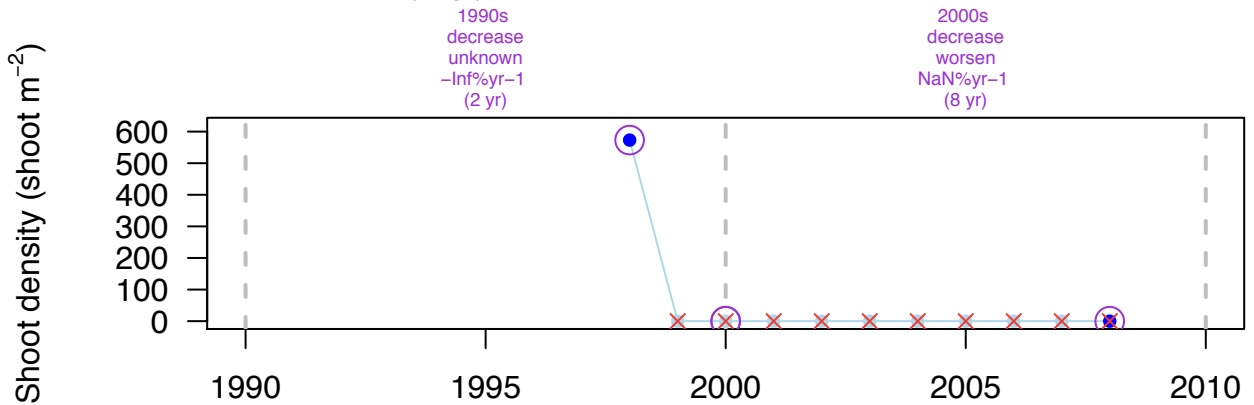

### 383\_biomass

Cabaço et al. 2010, Cabaço and Santos 2014, Cabaço and Santos (unpublished)

SITE: Ancão Peninsula (meadow C) (Portugal – Atlantic) – Cn (? m)

OVERALL: Net = 494.65 g dw m<sup>-2</sup>; Rate = 10.24 % yr<sup>-1</sup>; Perc Final = 278 % > increase

DECADAL: YES (10 yr)

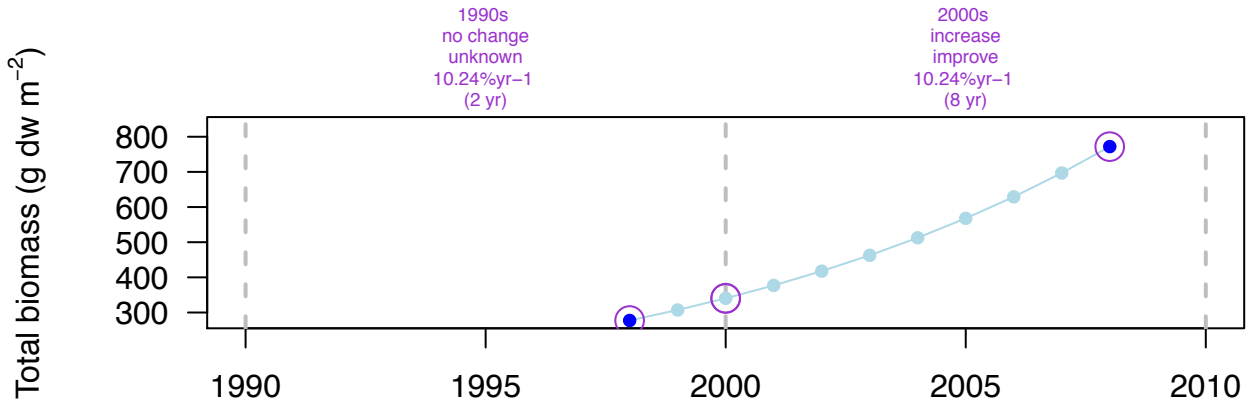

### 383\_density

Cabaço et al. 2010, Cabaço and Santos 2014, Cabaço and Santos (unpublished)

SITE: Ancão Peninsula (meadow C) (Portugal – Atlantic) – Cn (? m)

OVERALL: Net = 2712.31 shoot m<sup>-2</sup>; Rate = 16.73 % yr<sup>-1</sup>; Perc Final = 533 % > increase

DECADAL: YES (10 yr)

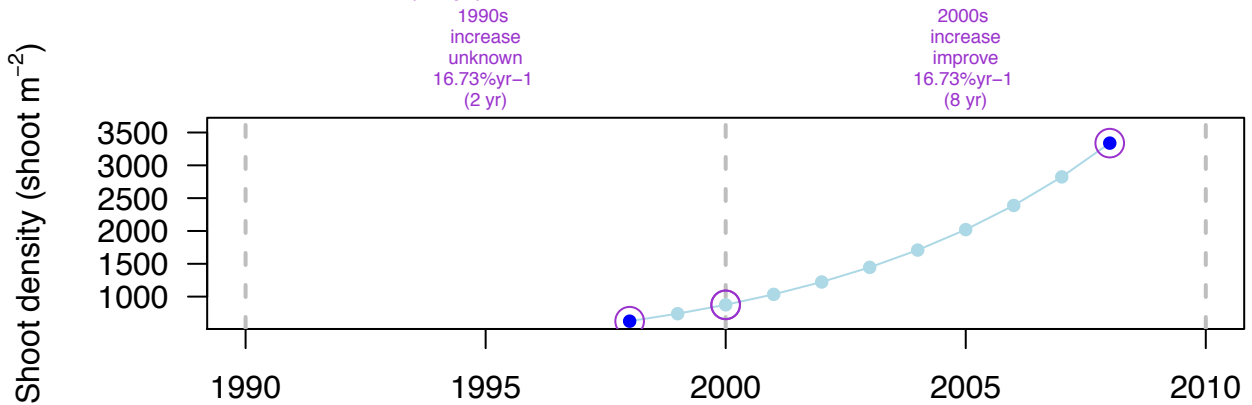

### 384\_biomass

Cabaço et al. 2010, Cabaço and Santos 2014, Cabaço and Santos (unpublished)

SITE: Ramalhete (meadow D) (Portugal – Atlantic) – Cn (? m)

OVERALL: Net =  $-109.11 \text{ g dw m}^{-2}$ ; Rate =  $-2.06 \text{ \% yr}^{-1}$ ; Perc Final = 75 % > decrease

DECADAL: YES (14 yr)

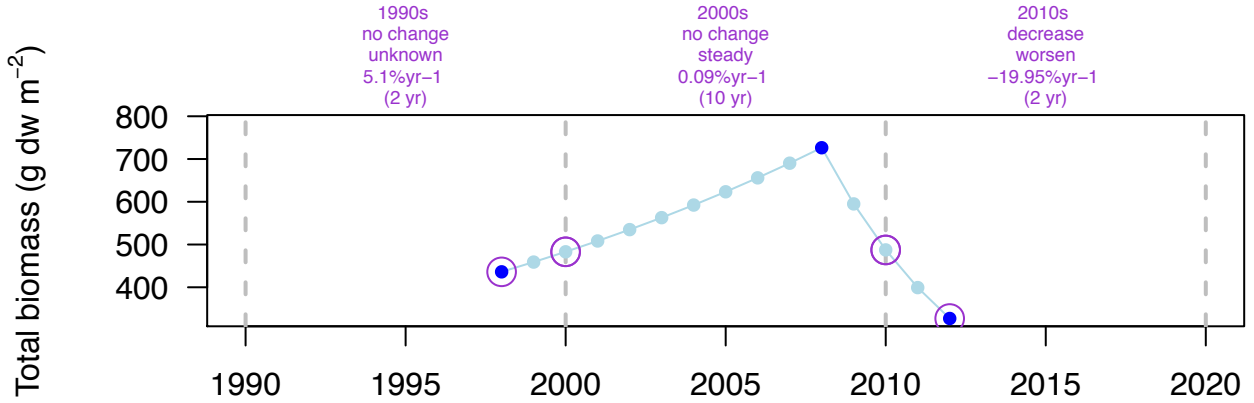

### 384\_density

Cabaço et al. 2010, Cabaço and Santos 2014, Cabaço and Santos (unpublished)

SITE: Ramalhete (meadow D) (Portugal – Atlantic) – Cn (? m)

OVERALL: Net =  $88.9 \text{ shoot m}^{-2}$ ; Rate =  $0.73 \text{ \% yr}^{-1}$ ; Perc Final = 111 % > no change

DECADAL: YES (14 yr)

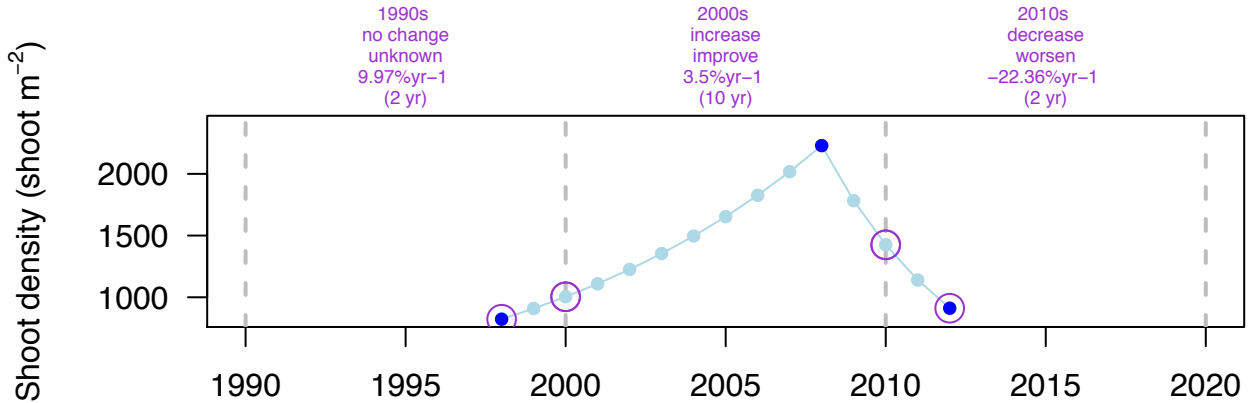

385\_biomass

Cabaço and Santos (unpublished)

SITE: Ramalhete (pond outfall) (Portugal – Atlantic) – Cn (? m)

OVERALL: Net = 404.56 g dw m<sup>-2</sup>; Rate = 47.5 % yr<sup>-1</sup>; Perc Final = 259 % > increase

DECADAL: NO (2 yr)

Total biomass (g dw m<sup>-2</sup>)

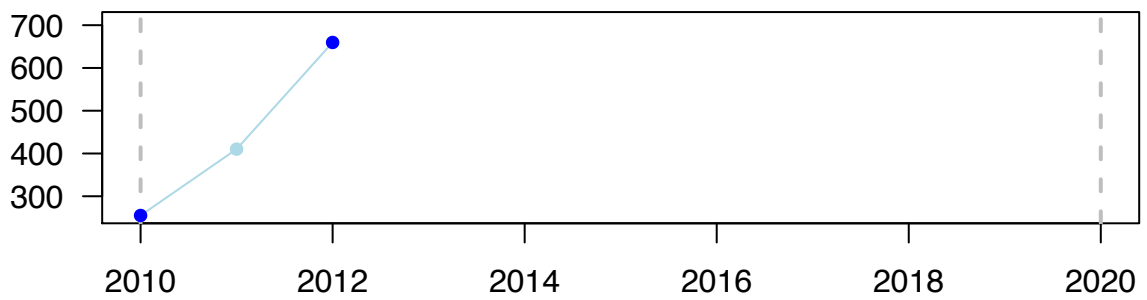

385\_density

Cabaço and Santos (unpublished)

SITE: Ramalhete (pond outfall) (Portugal – Atlantic) – Cn (? m)

OVERALL: Net = -277.52 shoot m<sup>-2</sup>; Rate = -22.56 % yr<sup>-1</sup>; Perc Final = 64 % > decrease

DECADAL: NO (2 yr)

Shoot density (shoot m<sup>-2</sup>)

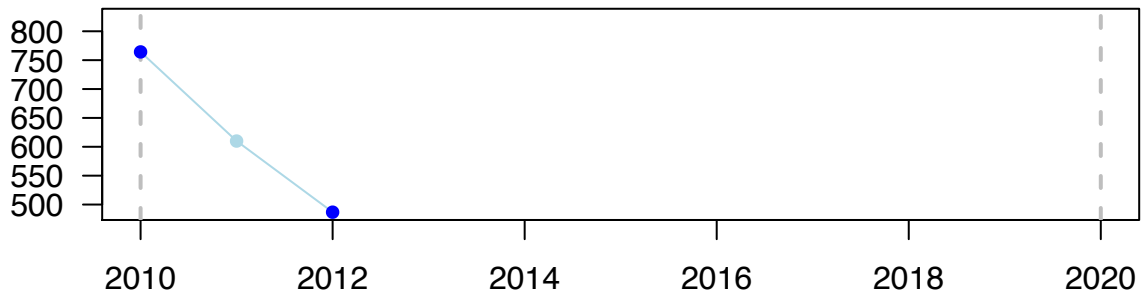

386\_biomass

Cabaço et al. 2007, 2008, Cabaço and Santos (unpublished)

SITE: Ramalhete (Portugal – Atlantic) – Zn (? m)

OVERALL: Net = 79.51 g dw m<sup>-2</sup>; Rate = 2.89 % yr<sup>-1</sup>; Perc Final = 134 % > increase

DECADAL: YES (10 yr)

Total biomass (g dw m<sup>-2</sup>)

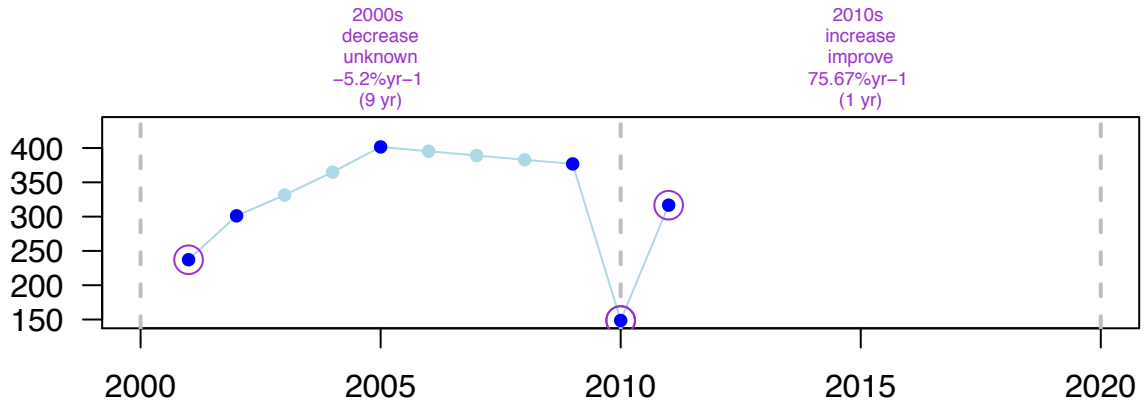

386\_density

Cabaço et al. 2007, 2008, Cabaço and Santos (unpublished)

SITE: Ramalhete (Portugal – Atlantic) – Zn (? m)

OVERALL: Net = -3385.12 shoot m<sup>-2</sup>; Rate = -3.02 % yr<sup>-1</sup>; Perc Final = 74 % > decrease

DECADAL: YES (10 yr)

Shoot density (shoot m<sup>-2</sup>)

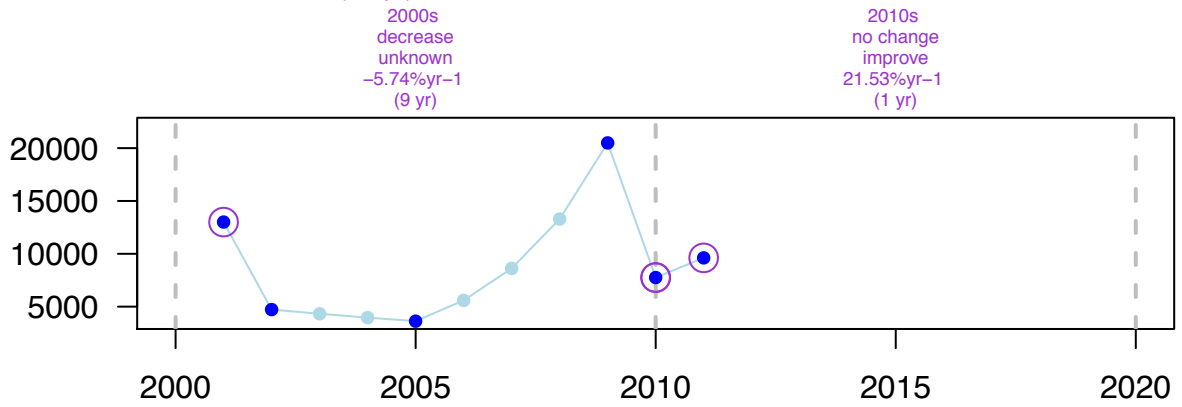



387\_biomass

Cabaço et al. 2007, 2008

SITE: ETAR Faro (Portugal – Atlantic) – Zn (? m)

OVERALL: Net =  $-85.31 \text{ g dw m}^{-2}$ ; Rate =  $-13 \text{ \% yr}^{-1}$ ; Perc Final = 59 % > decrease

DECADAL: NO (4 yr)

Total biomass ( $\text{g dw m}^{-2}$ )

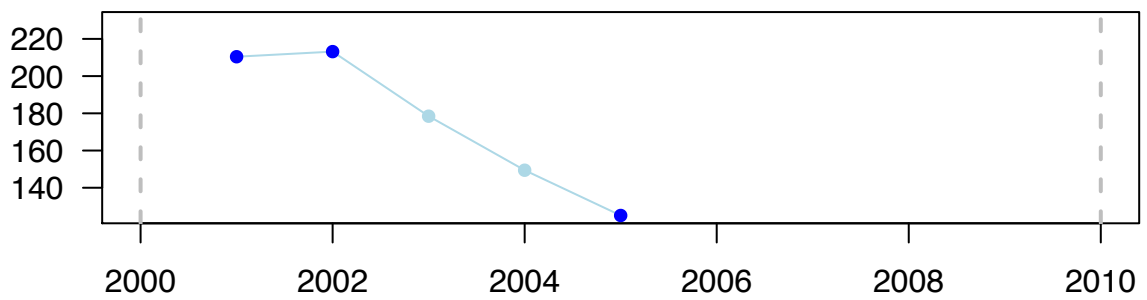

387\_density

Cabaço et al. 2007, 2008

SITE: ETAR Faro (Portugal – Atlantic) – Zn (? m)

OVERALL: Net =  $-3666.84 \text{ shoot m}^{-2}$ ; Rate =  $-28.27 \text{ \% yr}^{-1}$ ; Perc Final = 32 % > decrease

DECADAL: NO (4 yr)

Shoot density ( $\text{shoot m}^{-2}$ )

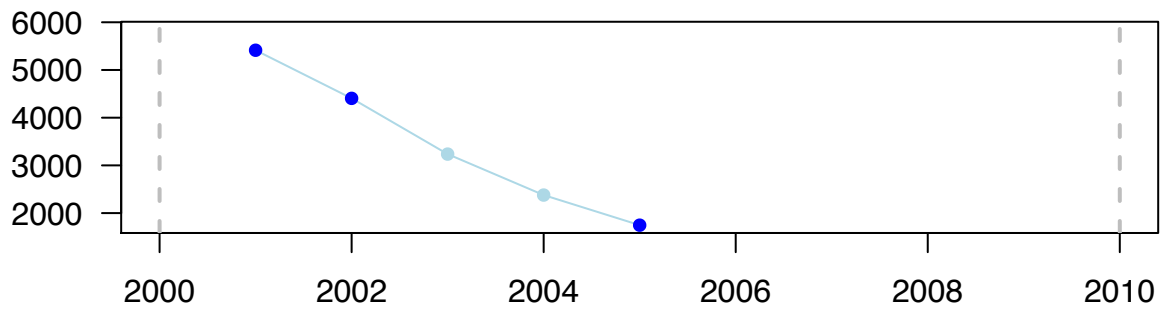

388\_biomass

Cabaço et al. 2007, 2008, Cabaço and Santos (unpublished)

SITE: Praia de Faro (Portugal – Atlantic) – Zn (? m)

OVERALL: Net = -389.81 g dw m<sup>-2</sup>; Rate = -32.58 % yr<sup>-1</sup>; Perc Final = 4 % > decrease

DECADAL: YES (10 yr)

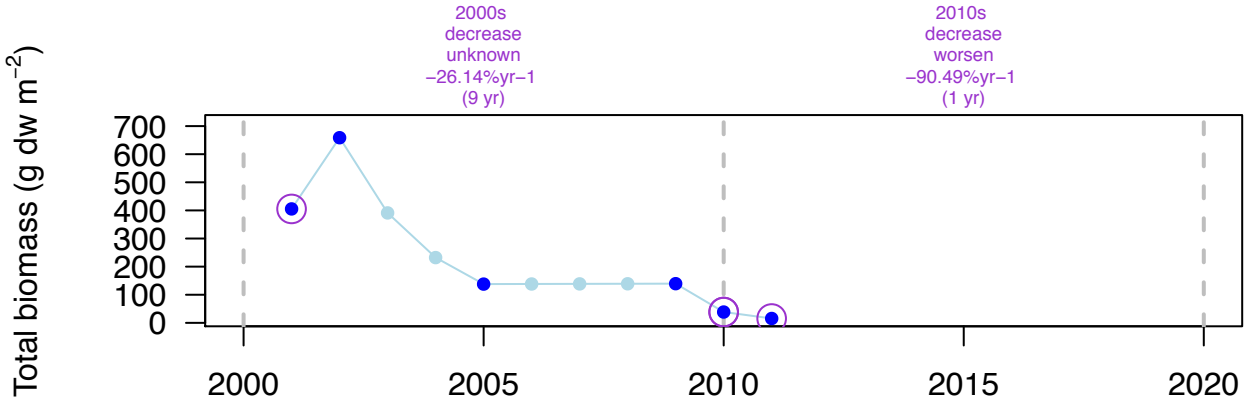

388\_density

Cabaço et al. 2007, 2008, Cabaço and Santos (unpublished)

SITE: Praia de Faro (Portugal – Atlantic) – Zn (? m)

OVERALL: Net = -4888.28 shoot m<sup>-2</sup>; Rate = -14.41 % yr<sup>-1</sup>; Perc Final = 24 % > decrease

DECADAL: YES (10 yr)

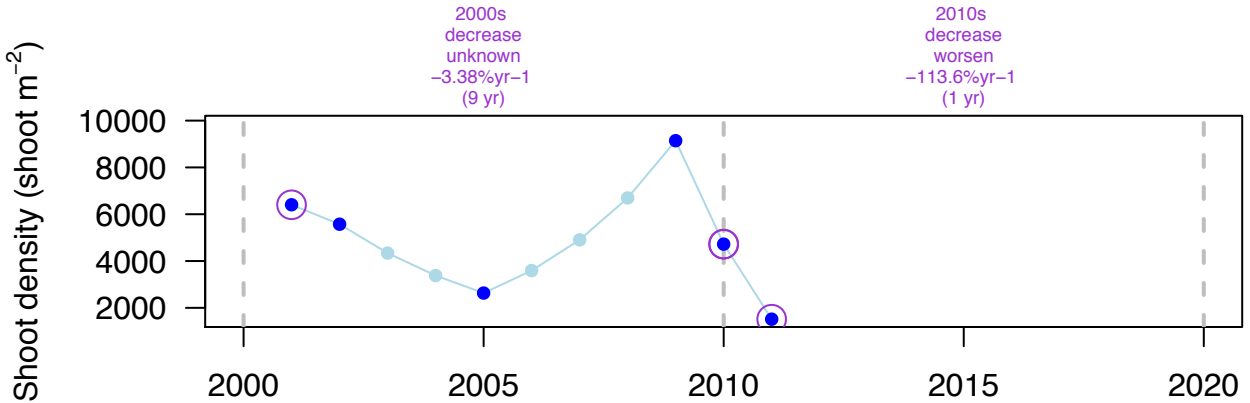

389\_biomass

Cabaço et al. 2007, 2008

SITE: Quatro Águas Faro (Portugal – Atlantic) – Zn (? m)

OVERALL: Net = -272.01 g dw m<sup>-2</sup>; Rate = -32.93 % yr<sup>-1</sup>; Perc Final = 27 % > decrease

DECADAL: NO (4 yr)

Total biomass (g dw m<sup>-2</sup>)

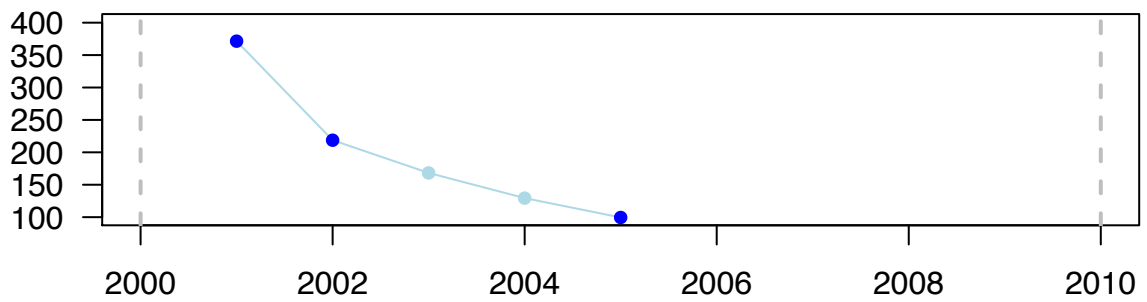

389\_density

Cabaço et al. 2007, 2008

SITE: Quatro Águas Faro (Portugal – Atlantic) – Zn (? m)

OVERALL: Net = -3852.62 shoot m<sup>-2</sup>; Rate = -24.45 % yr<sup>-1</sup>; Perc Final = 38 % > decrease

DECADAL: NO (4 yr)

Shoot density (shoot m<sup>-2</sup>)

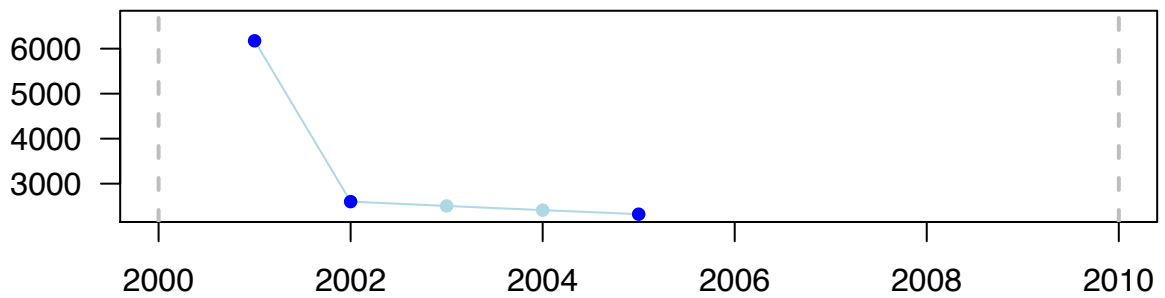

390\_biomass

Cabaço and Santos (unpublished)

SITE: Barra Faro (Portugal – Atlantic) – Zn (? m)

OVERALL: Net = -656.26 g dw m<sup>-2</sup>; Rate = NA % yr<sup>-1</sup>; Perc Final = NA % > decrease

DECADAL: NO (2 yr)

Total biomass (g dw m<sup>-2</sup>)

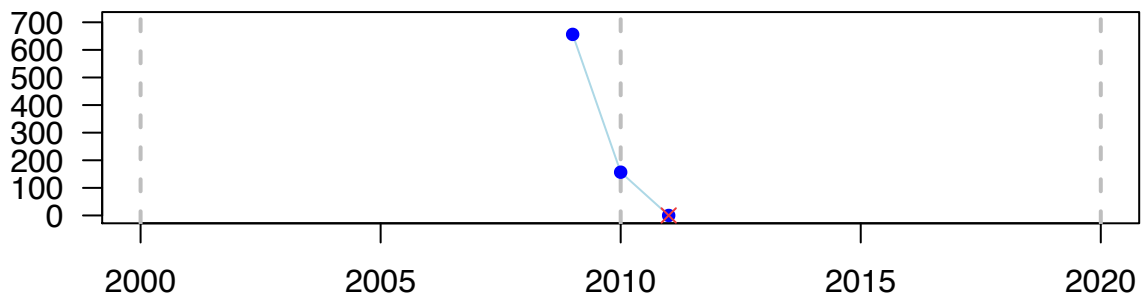

390\_cover

Cabaço and Santos (unpublished)

SITE: Barra Faro (Portugal – Atlantic) – Zn (? m)

OVERALL: Net = -99.67 %; Rate = NA % yr<sup>-1</sup>; Perc Final = NA % > decrease

DECADAL: NO (2 yr)

Cover (%)

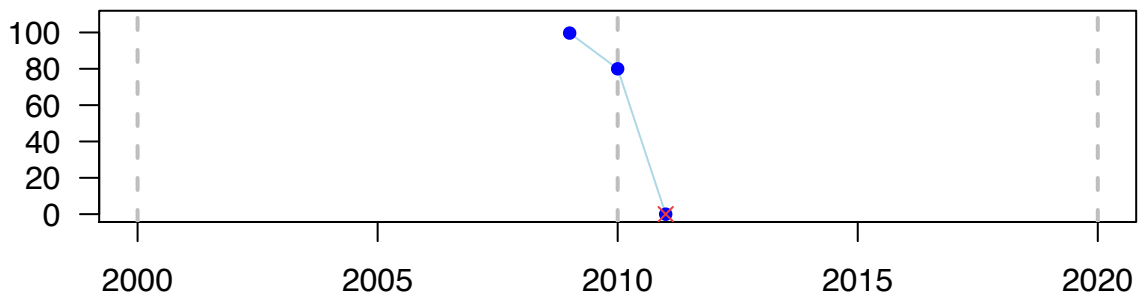

390\_density

Cabaço and Santos (unpublished)

SITE: Barra Faro (Portugal – Atlantic) – Zn (? m)

OVERALL: Net = -17158.46 shoot m<sup>-2</sup>; Rate = NA % yr<sup>-1</sup>; Perc Final = NA % > decrease

DECADAL: NO (2 yr)

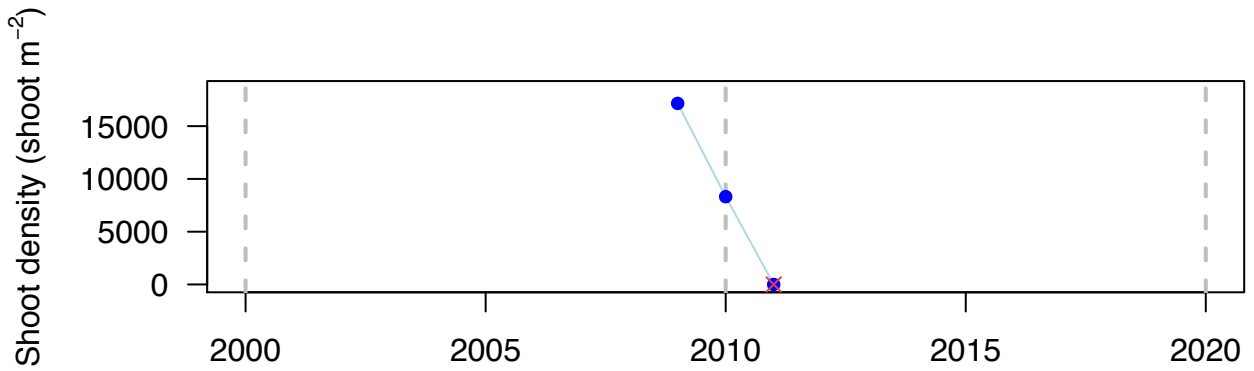

391\_biomass

Cabaço and Santos (unpublished)

SITE: ETAR Tavira (Portugal – Atlantic) – Zn (? m)

OVERALL: Net = -206.87 g dw m<sup>-2</sup>; Rate = NA % yr<sup>-1</sup>; Perc Final = NA % > decrease

DECADAL: NO (5 yr)

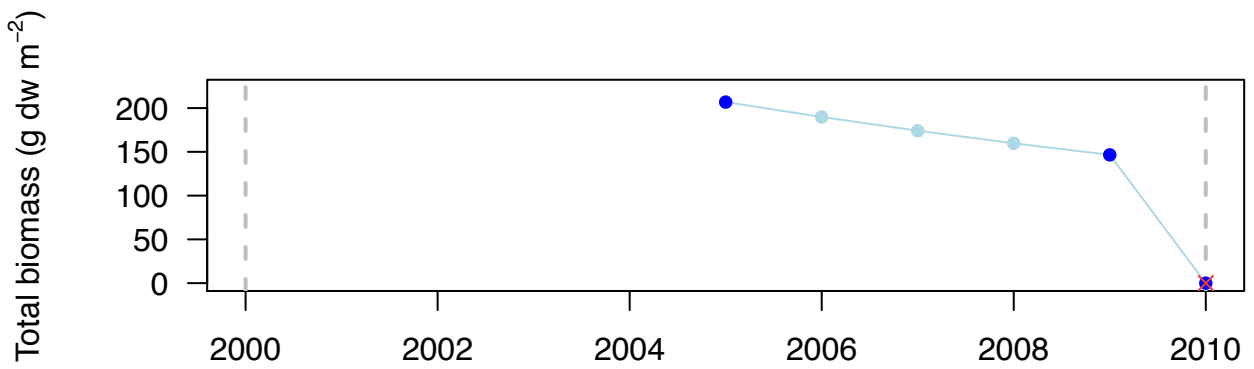

391\_density

Cabaço and Santos (unpublished)

SITE: ETAR Tavira (Portugal – Atlantic) – Zn (? m)

OVERALL: Net = -3295.29 shoot m<sup>-2</sup>; Rate = NA % yr<sup>-1</sup>; Perc Final = NA % > decrease

DECADAL: NO (5 yr)

Shoot density (shoot m<sup>-2</sup>)

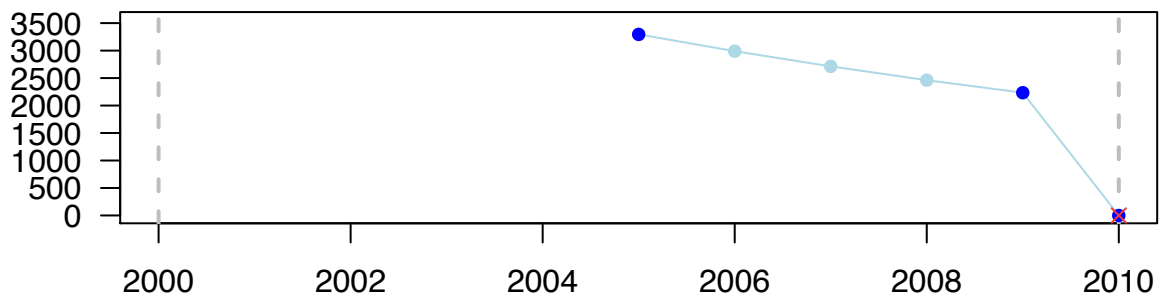

392\_biomass

Cabaço and Santos (unpublished)

SITE: Albacora Tavira (Portugal – Atlantic) – Zn (? m)

OVERALL: Net = -411.23 g dw m<sup>-2</sup>; Rate = NA % yr<sup>-1</sup>; Perc Final = NA % > decrease

DECADAL: NO (5 yr)

Total biomass (g dw m<sup>-2</sup>)

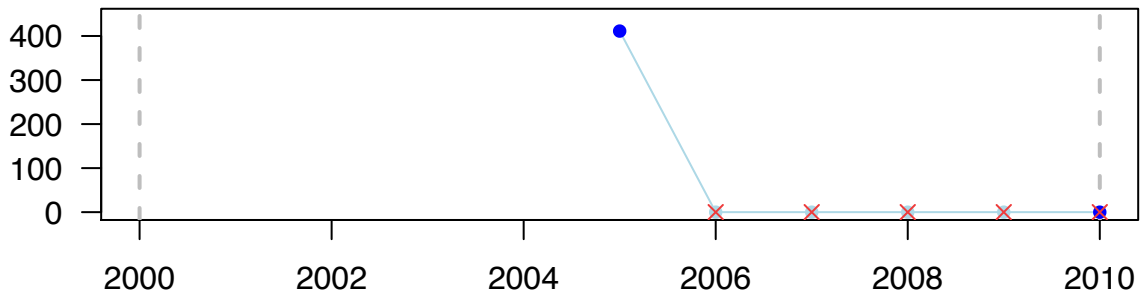

392\_density

Cabaço and Santos (unpublished)

SITE: Albacora Tavira (Portugal – Atlantic) – Zn (? m)

OVERALL: Net = -5949.22 shoot m<sup>-2</sup>; Rate = NA % yr<sup>-1</sup>; Perc Final = NA % > decrease

DECADAL: NO (5 yr)

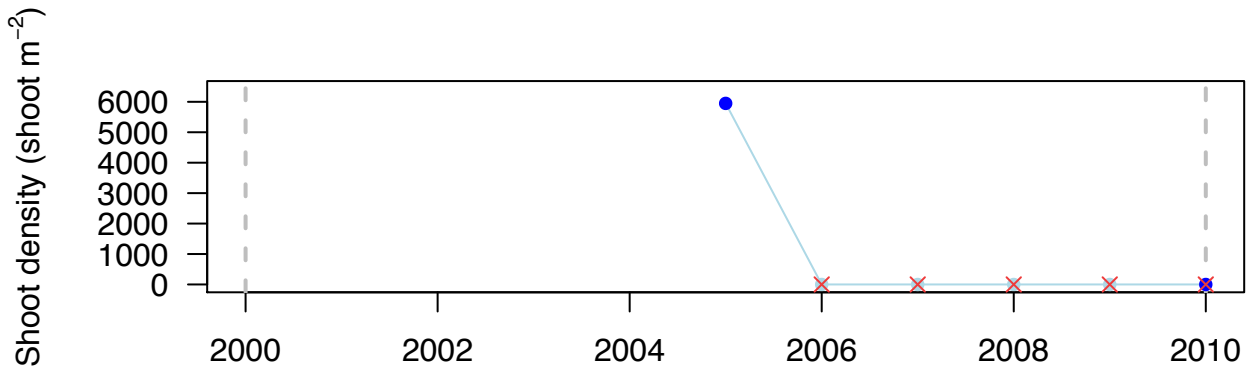

393\_biomass

Cabaço et al. 2007, Cabaço and Santos (unpublished)

SITE: ETAR Arade Estuary (Portugal – Atlantic) – Zn (? m)

OVERALL: Net = -95.92 g dw m<sup>-2</sup>; Rate = NA % yr<sup>-1</sup>; Perc Final = NA % > decrease

DECADAL: NO (4 yr)

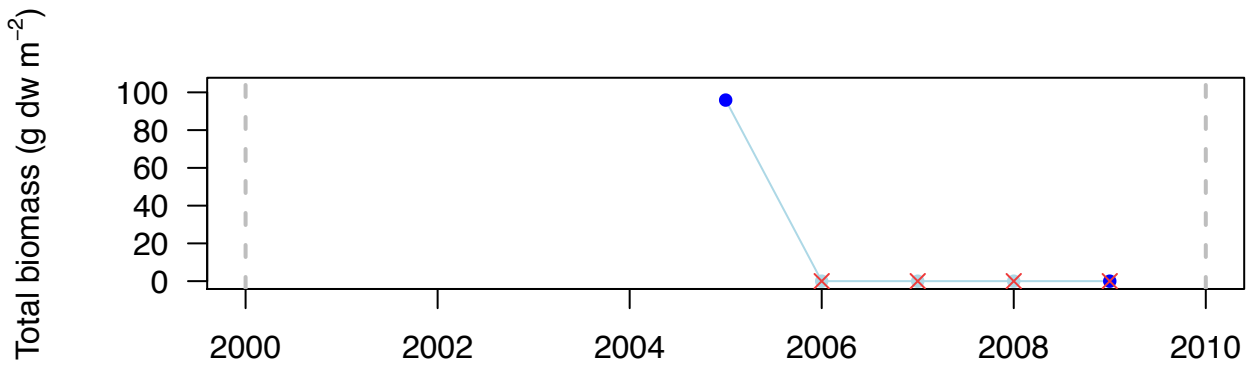

393\_density

Cabaço et al. 2007, Cabaço and Santos (unpublished)

SITE: ETAR Arade Estuary (Portugal – Atlantic) – Zn (? m)

OVERALL: Net = -3450.11 shoot m<sup>-2</sup>; Rate = NA % yr<sup>-1</sup>; Perc Final = NA % > decrease

DECADAL: NO (4 yr)

Shoot density (shoot m<sup>-2</sup>)

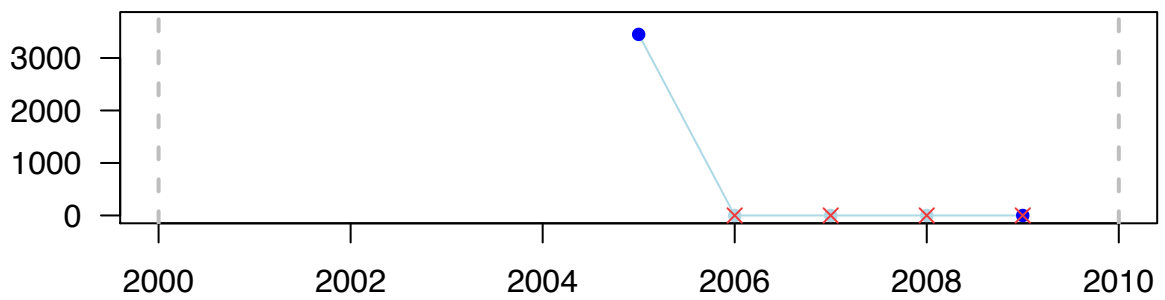

394\_biomass

Cabaço et al. 2007, Cabaço and Santos (unpublished)

SITE: Arade Estuary 2 (Portugal – Atlantic) – Zn (? m)

OVERALL: Net = -190.76 g dw m<sup>-2</sup>; Rate = NA % yr<sup>-1</sup>; Perc Final = NA % > decrease

DECADAL: NO (4 yr)

Total biomass (g dw m<sup>-2</sup>)

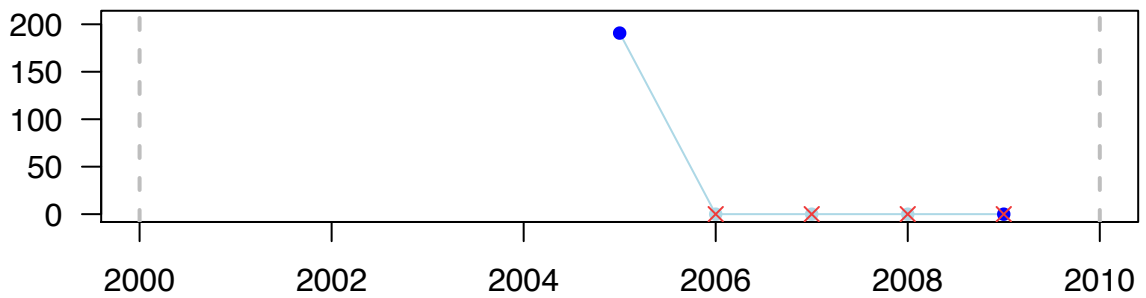



394\_density

Cabaço et al. 2007, Cabaço and Santos (unpublished)

SITE: Arade Estuary 2 (Portugal – Atlantic) – Zn (? m)

OVERALL: Net = -3162.6 shoot m<sup>-2</sup>; Rate = NA % yr<sup>-1</sup>; Perc Final = NA % > decrease

DECADAL: NO (4 yr)

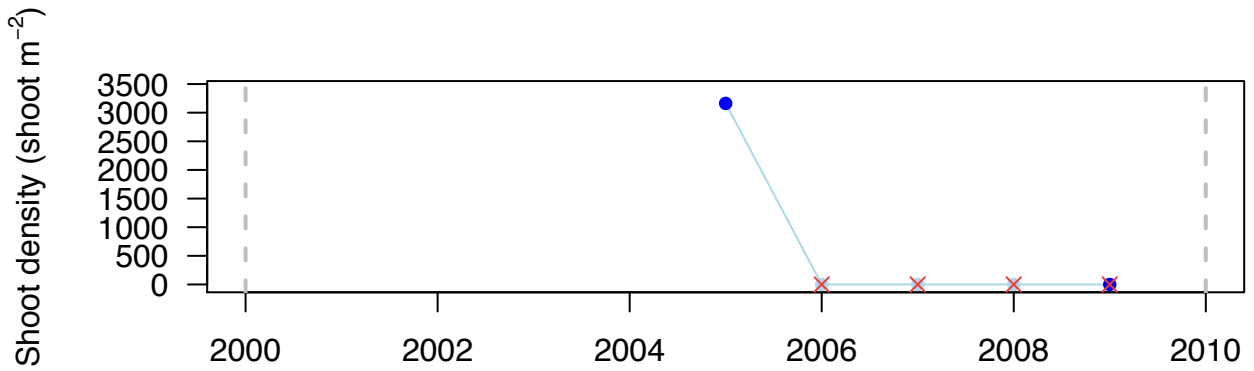

395\_biomass

Cabaço et al. 2007, Cabaço and Santos (unpublished)

SITE: Arade Estuary 3 (Portugal – Atlantic) – Zn (? m)

OVERALL: Net = -177.51 g dw m<sup>-2</sup>; Rate = NA % yr<sup>-1</sup>; Perc Final = NA % > decrease

DECADAL: NO (4 yr)

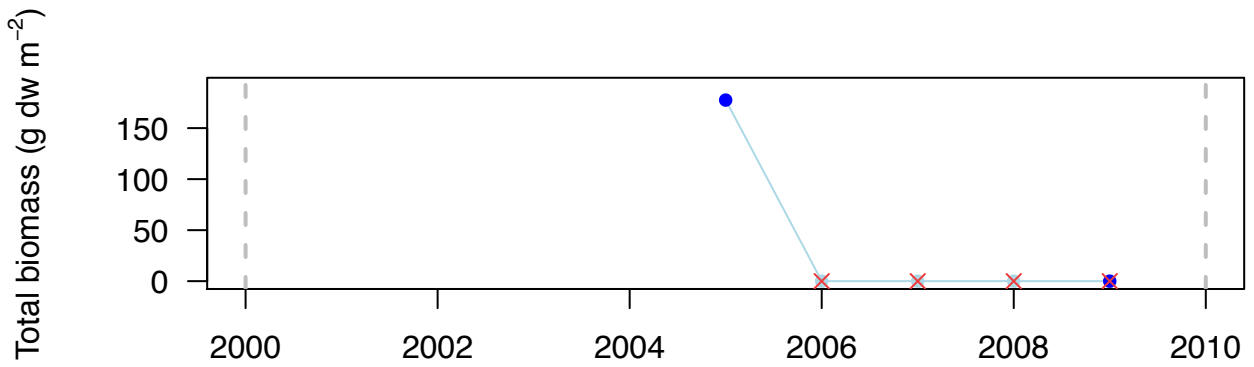

395\_density

Cabaço et al. 2007, Cabaço and Santos (unpublished)

SITE: Arade Estuary 3 (Portugal – Atlantic) – Zn (? m)

OVERALL: Net = -1636.59 shoot m<sup>-2</sup>; Rate = NA % yr<sup>-1</sup>; Perc Final = NA % > decrease

DECADAL: NO (4 yr)

Shoot density (shoot m<sup>-2</sup>)

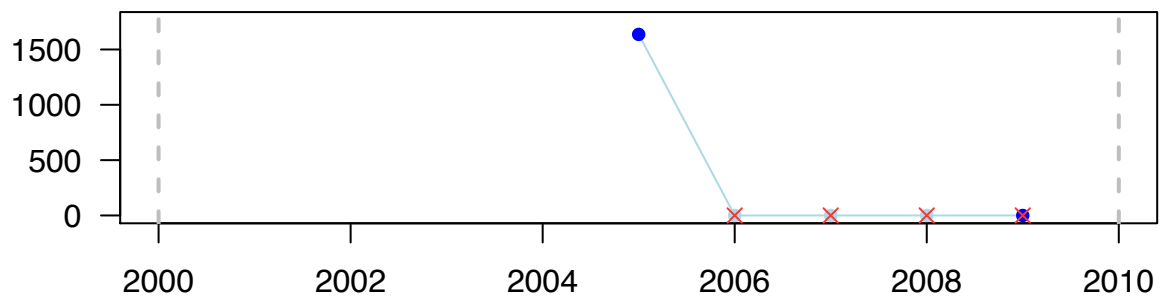

396\_biomass

Cabaço et al. 2007, Cabaço and Santos (unpublished)

SITE: Arade Moinhos (Portugal – Atlantic) – Zn (? m)

OVERALL: Net = -272.64 g dw m<sup>-2</sup>; Rate = NA % yr<sup>-1</sup>; Perc Final = NA % > decrease

DECADAL: NO (4 yr)

Total biomass (g dw m<sup>-2</sup>)

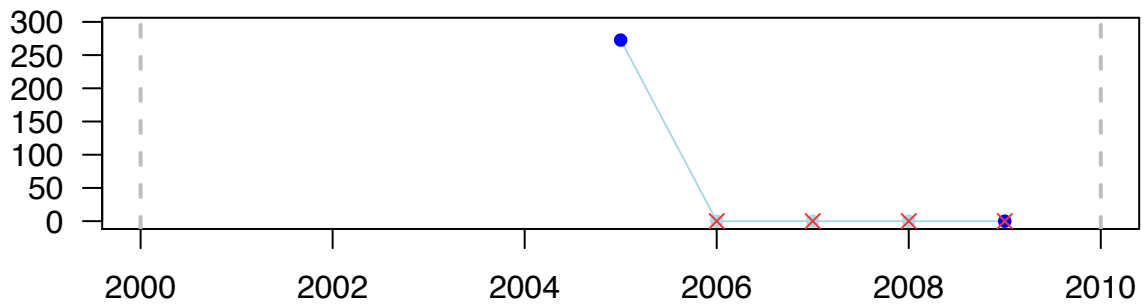

396\_density

Cabaço et al. 2007, Cabaço and Santos (unpublished)

SITE: Arade Moinhos (Portugal – Atlantic) – Zn (? m)

OVERALL: Net = -3715.5 shoot m<sup>-2</sup>; Rate = NA % yr<sup>-1</sup>; Perc Final = NA % > decrease

DECADAL: NO (4 yr)

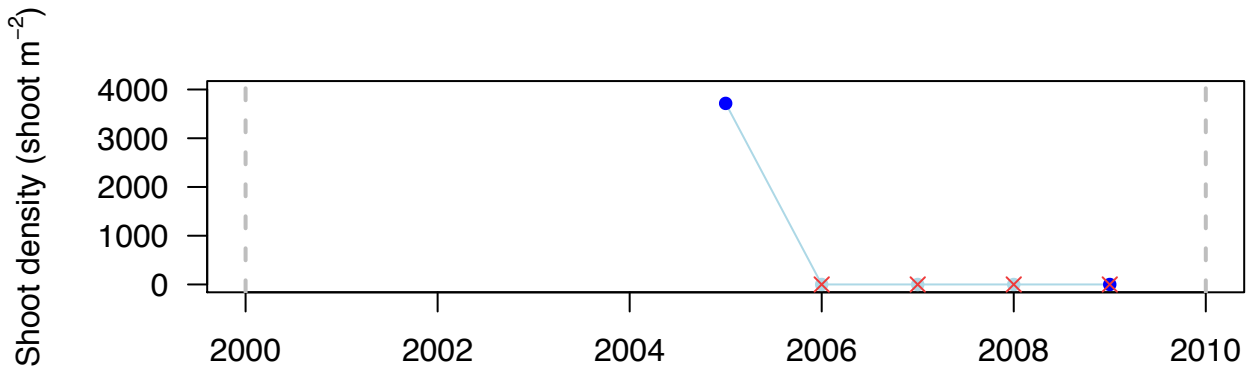

397\_biomass

Cabaço et al. 2007, Cabaço and Santos (unpublished)

SITE: Guadiana Estuary (Portugal – Atlantic) – Zn (? m)

OVERALL: Net = -97.89 g dw m<sup>-2</sup>; Rate = -27.5 % yr<sup>-1</sup>; Perc Final = 33 % > decrease

DECADAL: NO (4 yr)

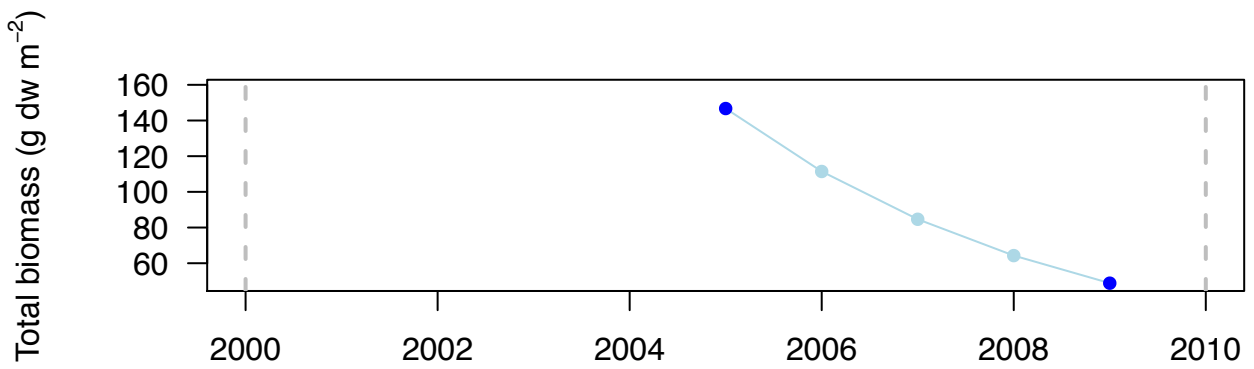

397\_density

Cabaço et al. 2007, Cabaço and Santos (unpublished)

SITE: Guadiana Estuary (Portugal – Atlantic) – Zn (? m)

OVERALL: Net = 2441.79 shoot m<sup>-2</sup>; Rate = 13.25 % yr<sup>-1</sup>; Perc Final = 170 % > increase

DECADAL: NO (4 yr)

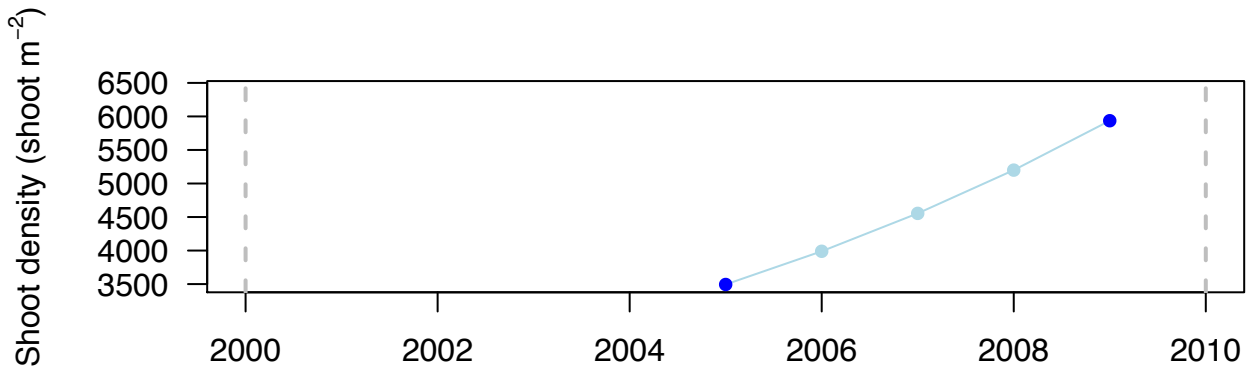

399\_area

Pergent (unpublished)

SITE: Calvi (France – Mediterranean) – Po (-25 m)

OVERALL: Net = 0 ha; Rate = 0 % yr<sup>-1</sup>; Perc Final = 100 % > no change

DECADAL: NO (6 yr)

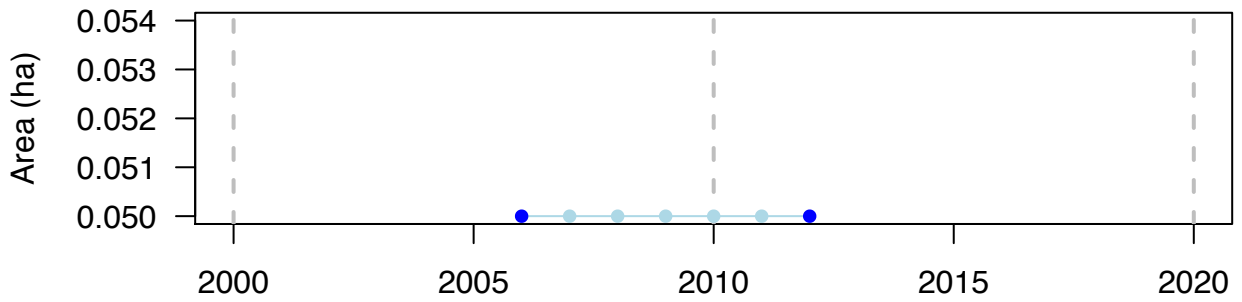

399\_biomass

Pergent (unpublished)

SITE: Calvi (France – Mediterranean) – Po (-25 m)

OVERALL: Net = -52 g dw m<sup>-2</sup>; Rate = -1.99 % yr<sup>-1</sup>; Perc Final = 89 % > no change

DECADAL: NO (6 yr)

Total biomass (g dw m<sup>-2</sup>)

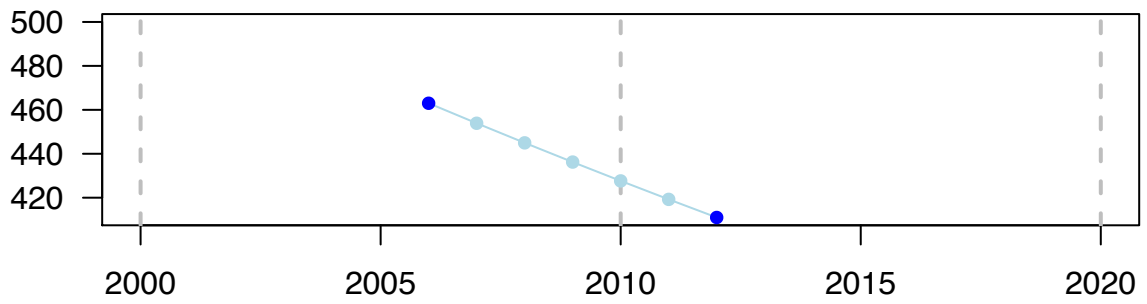

399\_cover

Pergent (unpublished)

SITE: Calvi (France – Mediterranean) – Po (-25 m)

OVERALL: Net = -4 %; Rate = -0.68 % yr<sup>-1</sup>; Perc Final = 96 % > no change

DECADAL: NO (6 yr)

Cover (%)

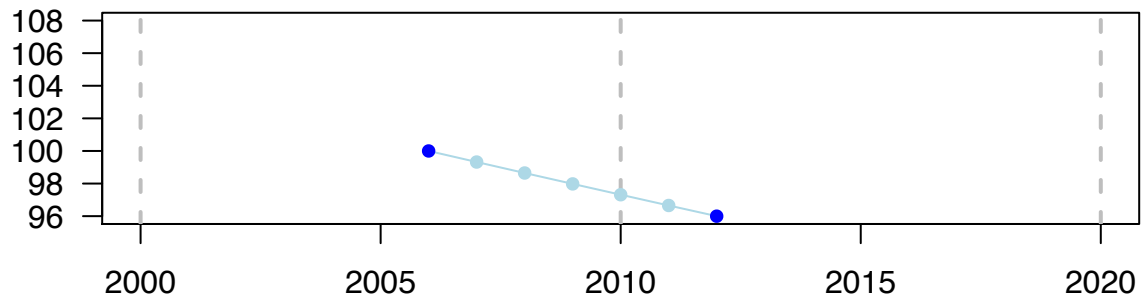

399\_density

Pergent (unpublished)

SITE: Calvi (France – Mediterranean) – Po (-25 m)

OVERALL: Net = 0 shoot m<sup>-2</sup>; Rate = 0 % yr<sup>-1</sup>; Perc Final = 100 % > no change

DECADAL: NO (6 yr)

Shoot density (shoot m<sup>-2</sup>)

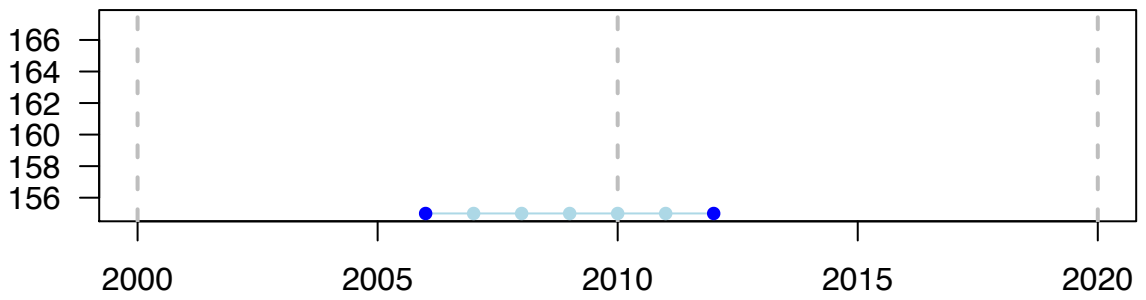

401\_area

Pergent (unpublished)

SITE: Calvi (France – Mediterranean) – Po (-9 m)

OVERALL: Net = 0 ha; Rate = 0 % yr<sup>-1</sup>; Perc Final = 100 % > no change

DECADAL: NO (6 yr)

Area (ha)

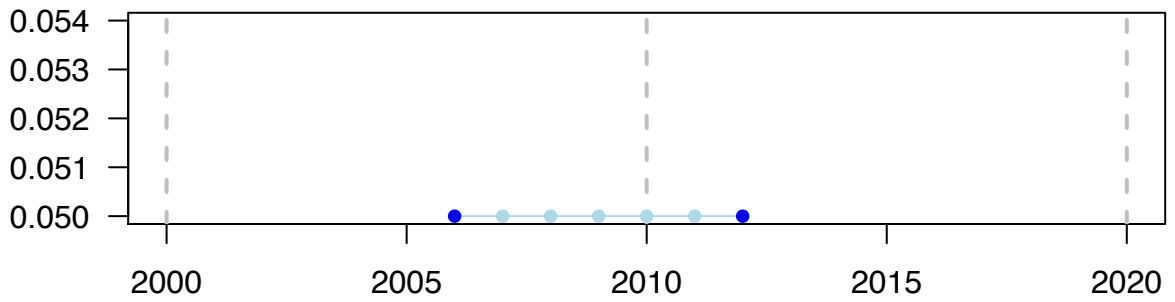

401\_biomass

Pergent (unpublished)

SITE: Calvi (France – Mediterranean) – Po (-9 m)

OVERALL: Net = -64 g dw m<sup>-2</sup>; Rate = -1.73 % yr<sup>-1</sup>; Perc Final = 90 % > no change

DECADAL: NO (6 yr)

Total biomass (g dw m<sup>-2</sup>)

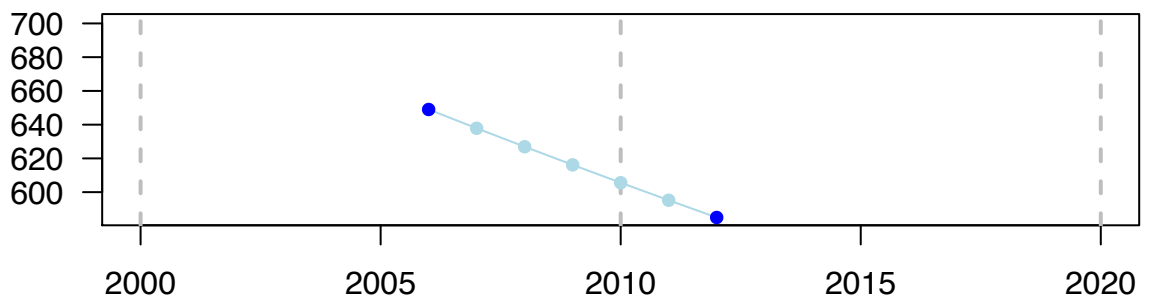

401\_cover

Pergent (unpublished)

SITE: Calvi (France – Mediterranean) – Po (-9 m)

OVERALL: Net = 28 %; Rate = 5.68 % yr<sup>-1</sup>; Perc Final = 141 % > increase

DECADAL: NO (6 yr)

Cover (%)

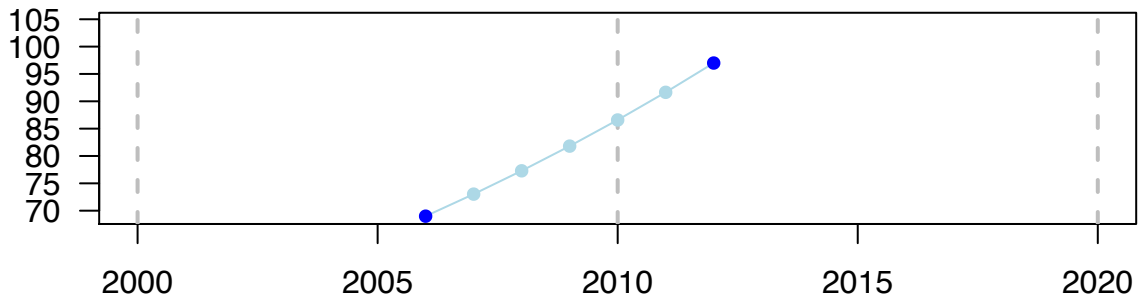

401\_density

Pergent (unpublished)

SITE: Calvi (France – Mediterranean) – Po (-9 m)

OVERALL: Net = 164 shoot m<sup>-2</sup>; Rate = 9 % yr<sup>-1</sup>; Perc Final = 172 % > increase

DECADAL: NO (6 yr)

Shoot density (shoot m<sup>-2</sup>)

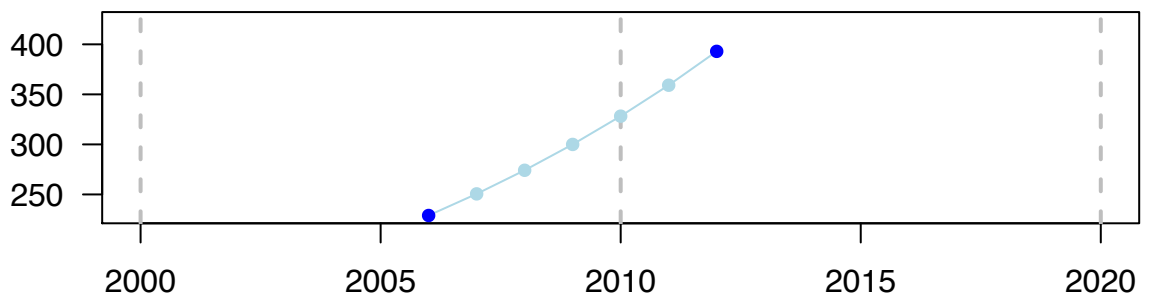

402\_area

Bourcier 1989

SITE: Oest de Sanary (France – Mediterranean) – Po (? m)

OVERALL: Net = -220 ha; Rate = -12.24 % yr<sup>-1</sup>; Perc Final = 48 % > decrease

DECADAL: NO (6 yr)

Area (ha)

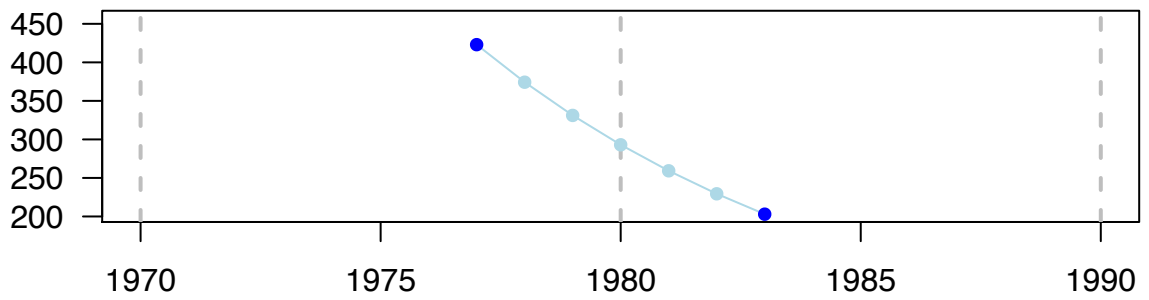



403\_area

Augier and Boudouresque 1975

SITE: Baie de la Palud (France – Mediterranean) – Po (? m)

OVERALL: Net = -2.7 ha; Rate = -4.29 % yr<sup>-1</sup>; Perc Final = 65 % > decrease

DECADAL: YES (10 yr)

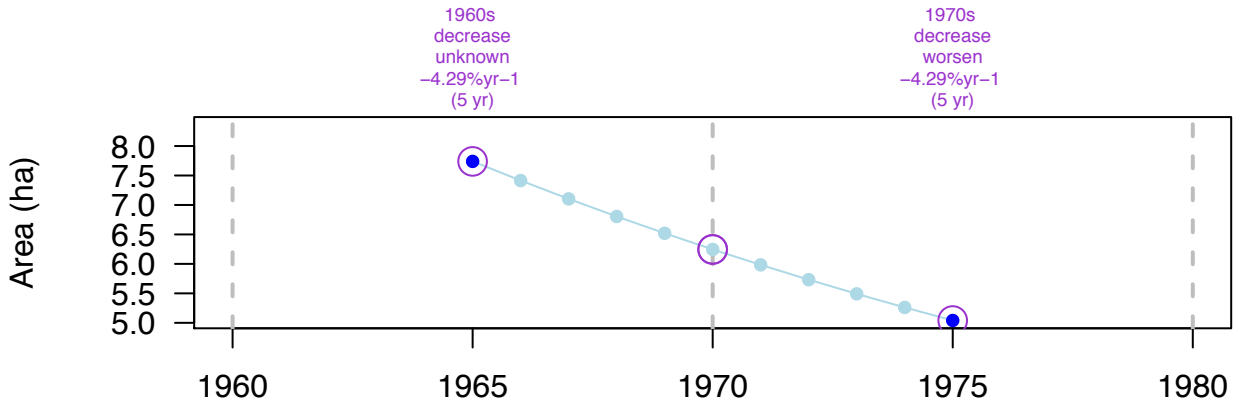

404\_area

Auby et al. 2010

SITE: Pertuis Charentais (France – Atlantic) – Zn (? m)

OVERALL: Net = 105.65 ha; Rate = 0.46 % yr<sup>-1</sup>; Perc Final = 109 % > no change

DECADAL: YES (18 yr)

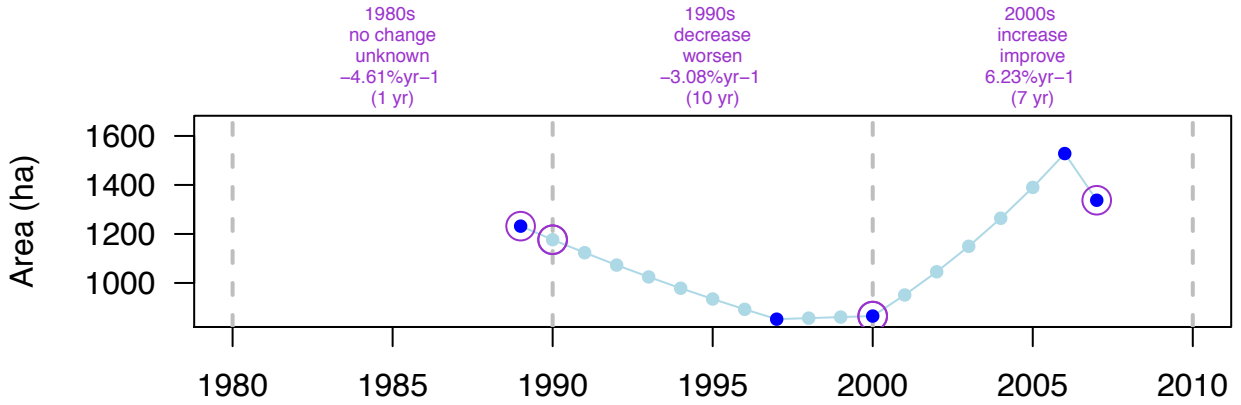

405\_density

Zupo et al. 2006

SITE: Lacco Ameno (Ischia) (Italy – Mediterranean) – Po (? m)

OVERALL: Net = -28.57 shoot m<sup>-2</sup>; Rate = -1.05 % yr<sup>-1</sup>; Perc Final = 92 % > no change

DECADAL: YES (8 yr)

Shoot density (shoot m<sup>-2</sup>)

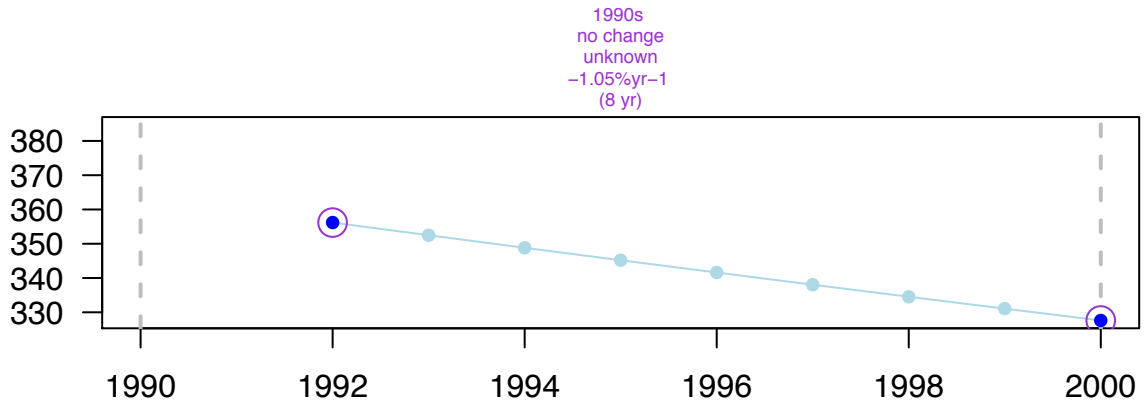

406\_cover

Coll et al. 1999

SITE: Port de Cabrera (Spain – Mediterranean) – Po (? m)

OVERALL: Net = 14.6 %; Rate = 2.64 % yr<sup>-1</sup>; Perc Final = 124 % > no change

DECADAL: YES (8 yr)

Cover (%)

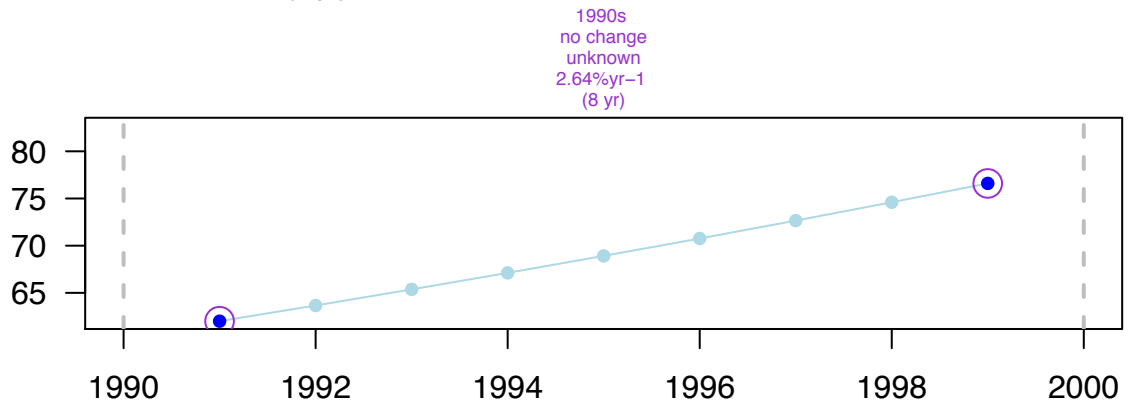

407\_density

Guillén-Nieto and Ramos-Esplá 1994

SITE: Isla de Tabarca (Spain – Mediterranean) – Po (-19.3 m)

OVERALL: Net = 50 shoot m<sup>-2</sup>; Rate = 59.73 % yr<sup>-1</sup>; Perc Final = 600 % > increase

DECADAL: NO (3 yr)

Shoot density (shoot m<sup>-2</sup>)

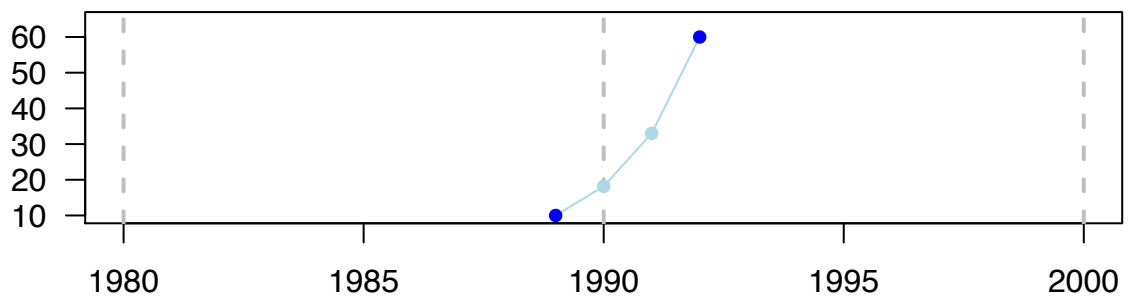

408\_area

Ruiz et al. 1993, Ruiz and Romero 2003

SITE: Levante Bay (Spain – Mediterranean) – Po (? m)

OVERALL: Net = -3.65 ha; Rate = -1.98 % yr<sup>-1</sup>; Perc Final = 79 % > decrease

DECADAL: YES (12 yr)

1970s  
no change  
unknown  
-1.98%yr<sup>-1</sup>  
(3 yr)

1980s  
decrease  
worsen  
-1.98%yr<sup>-1</sup>  
(9 yr)

Area (ha)

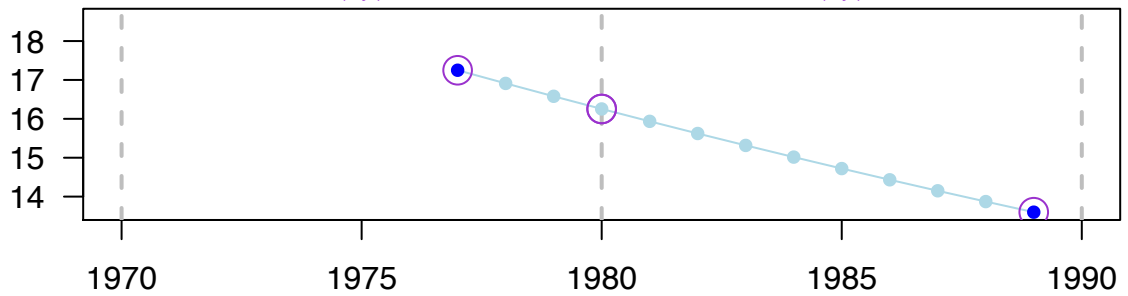

410\_area

Montefalcone et al. 2013

SITE: Genova Vesima (Italy – Mediterranean) – Po (-3.3 m)

OVERALL: Net = -3.2 ha; Rate = NA % yr<sup>-1</sup>; Perc Final = NA % > decrease

DECADAL: YES (15 yr)

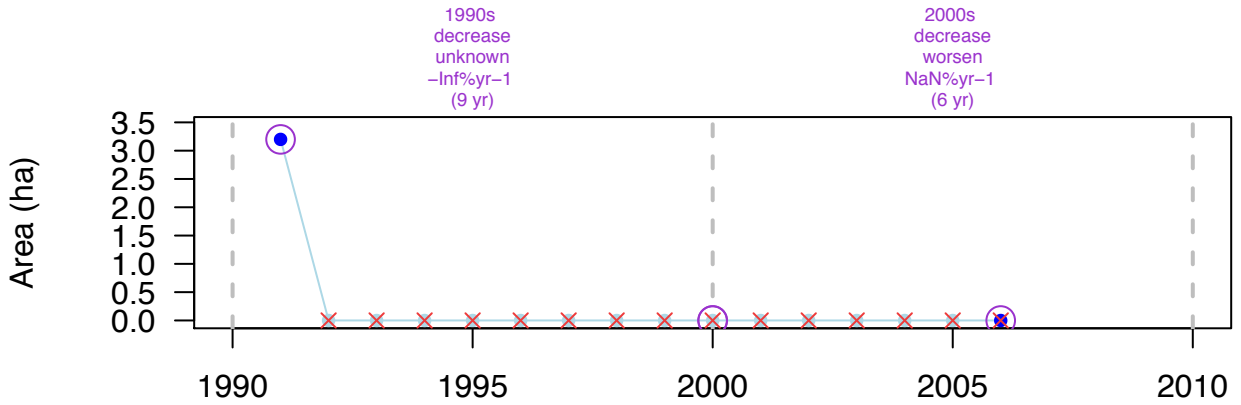

416\_area

Montefalcone et al. 2013

SITE: Ventimiglia (Italy – Mediterranean) – Po (-12.5 m)

OVERALL: Net = 84.098 ha; Rate = 2.72 % yr<sup>-1</sup>; Perc Final = 155 % > increase

DECADAL: YES (16 yr)

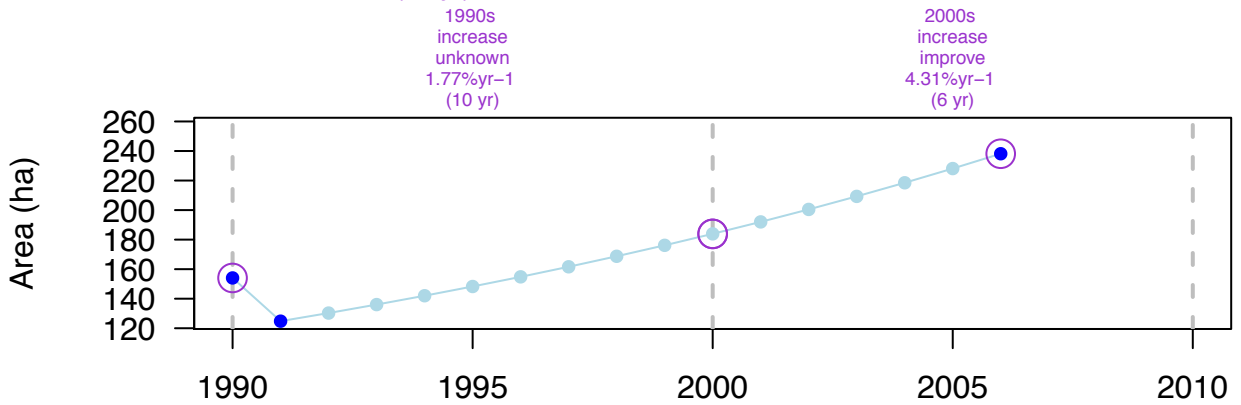

417\_area

Montefalcone et al. 2013

SITE: Sanremo (Italy – Mediterranean) – Po (-16.4 m)

OVERALL: Net = 32.683 ha; Rate = 0.26 % yr<sup>-1</sup>; Perc Final = 104 % > no change

DECADAL: YES (16 yr)

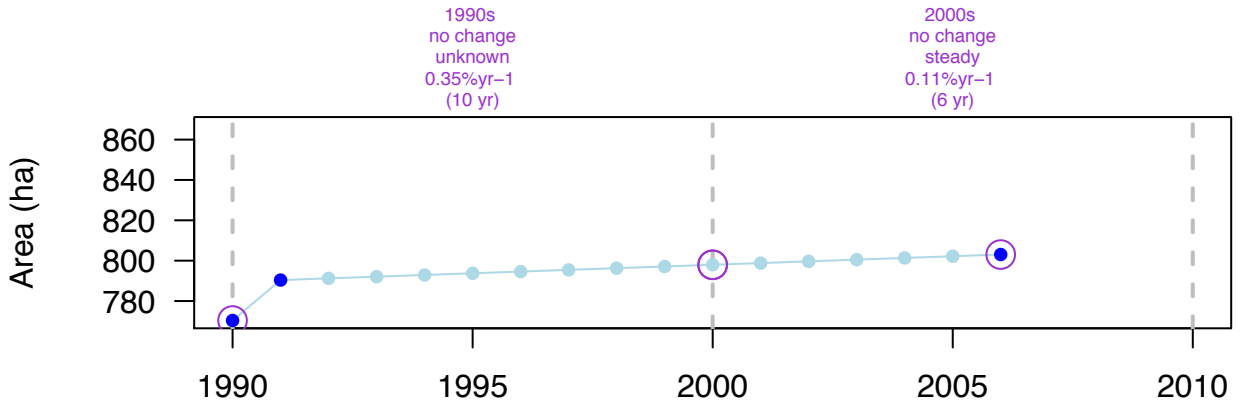

418\_area

Montefalcone et al. 2013

SITE: Santo Stefano al Mare (Italy – Mediterranean) – Po (-18.2 m)

OVERALL: Net = 40.399 ha; Rate = 0.74 % yr<sup>-1</sup>; Perc Final = 113 % > increase

DECADAL: YES (16 yr)

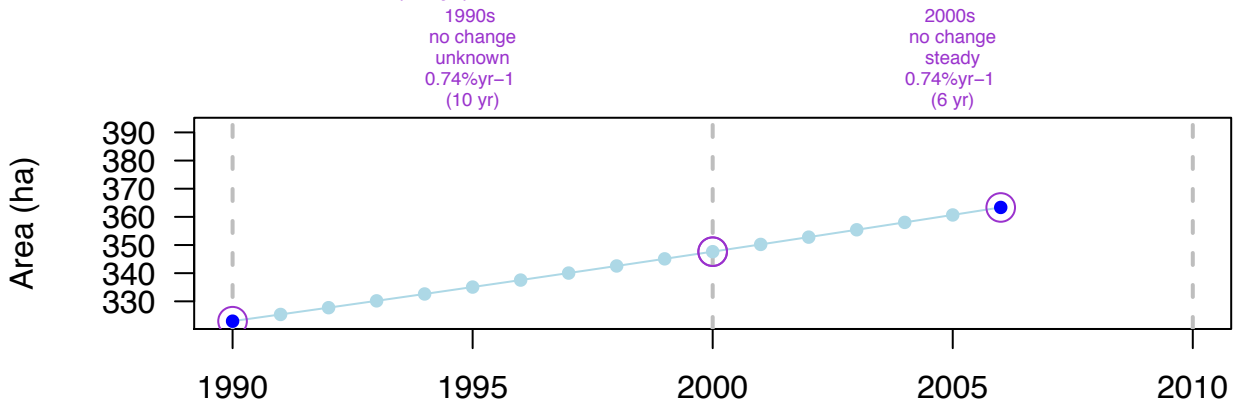

419\_area

Montefalcone et al. 2013

SITE: Porto Maurizio (Italy – Mediterranean) – Po (-17.5 m)

OVERALL: Net = 31.575 ha; Rate = 0.3 % yr<sup>-1</sup>; Perc Final = 105 % > no change

DECADAL: YES (16 yr)

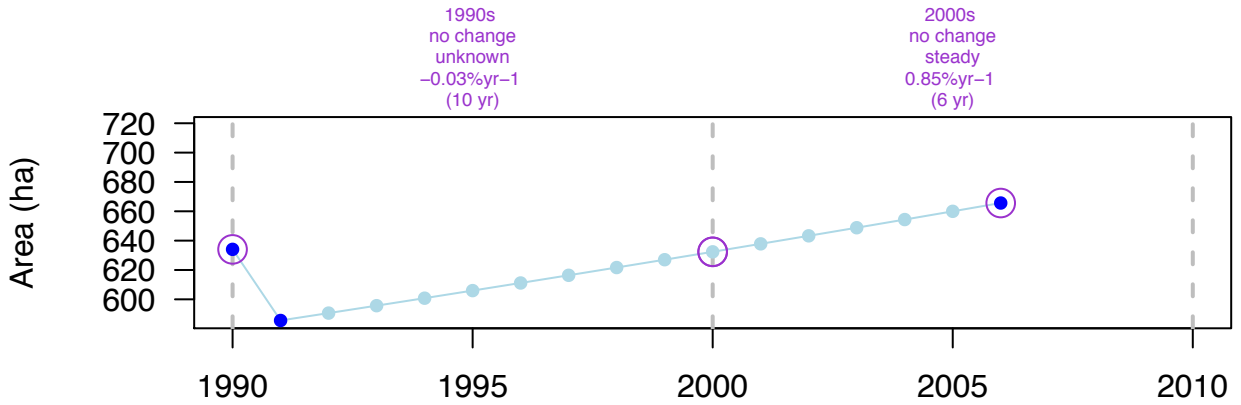

420\_area

Montefalcone et al. 2013

SITE: Diano Marina (Italy – Mediterranean) – Po (-16.4 m)

OVERALL: Net = -26.938 ha; Rate = -0.42 % yr<sup>-1</sup>; Perc Final = 94 % > no change

DECADAL: YES (16 yr)

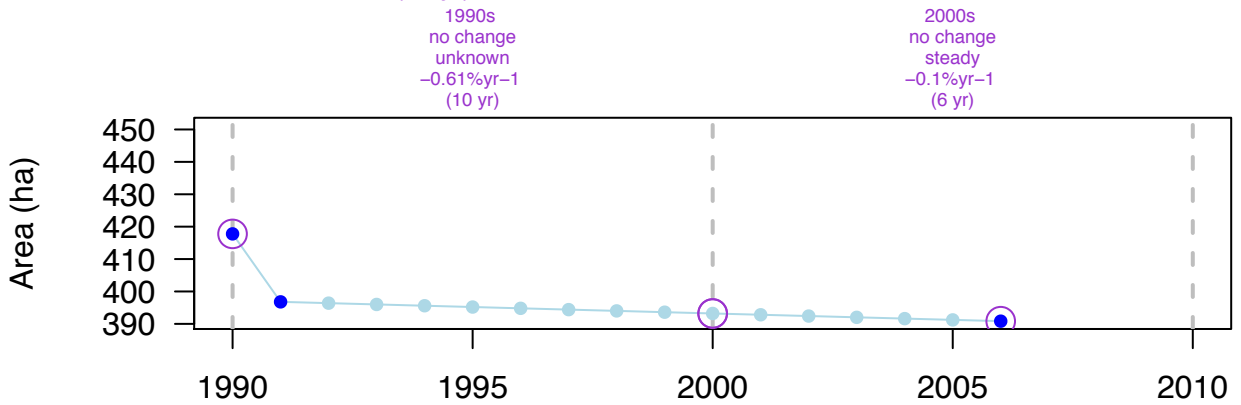

421\_area

Montefalcone et al. 2013

SITE: Laigueglia (Italy – Mediterranean) – Po (-15 m)

OVERALL: Net = -141.205 ha; Rate = -4.49 % yr<sup>-1</sup>; Perc Final = 49 % > decrease

DECADAL: YES (16 yr)

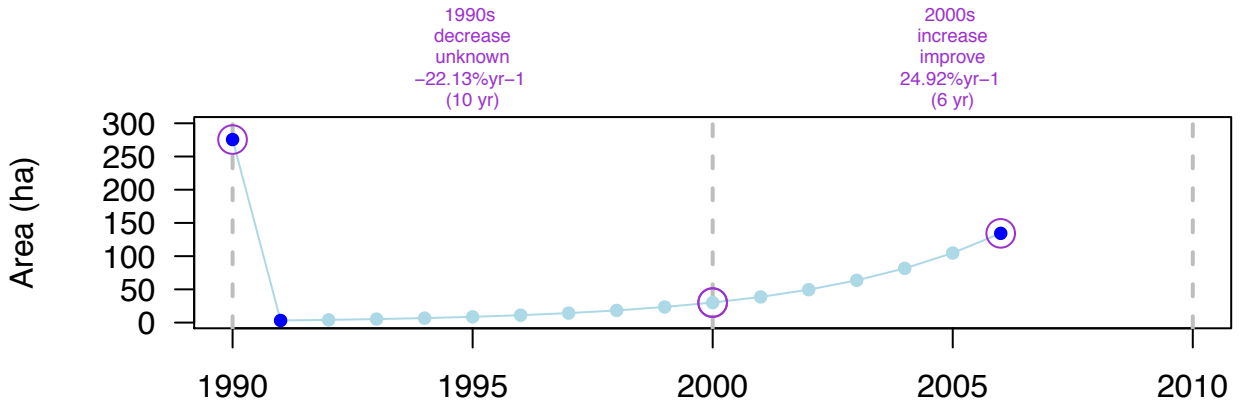

422\_area

Montefalcone et al. 2013

SITE: Isola Gallinara (Italy – Mediterranean) – Po (-10.6 m)

OVERALL: Net = -65.434 ha; Rate = -3.37 % yr<sup>-1</sup>; Perc Final = 58 % > decrease

DECADAL: YES (16 yr)

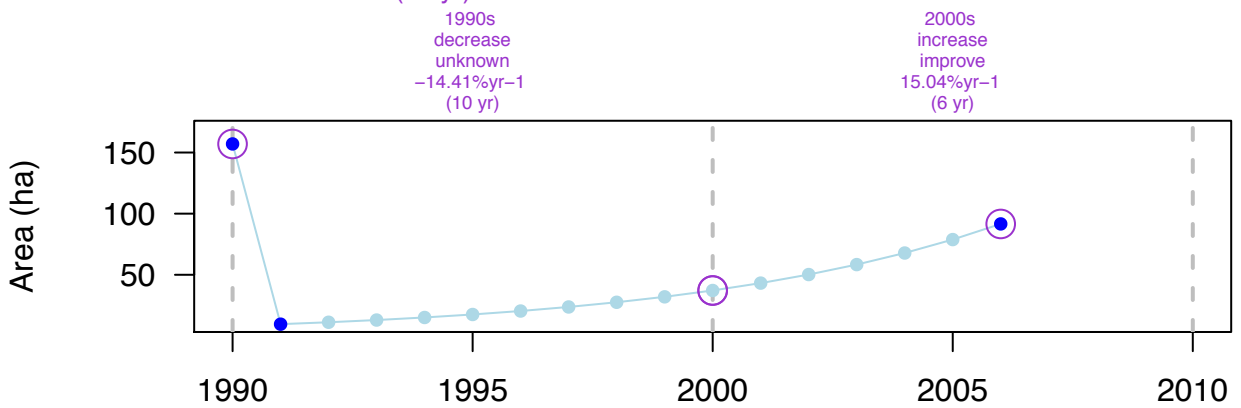

423\_area

Montefalcone et al. 2013

SITE: Albenga – Loano (Italy – Mediterranean) – Po (-14.3 m)

OVERALL: Net = -30.896 ha; Rate = -0.52 % yr<sup>-1</sup>; Perc Final = 92 % > no change

DECADAL: YES (16 yr)

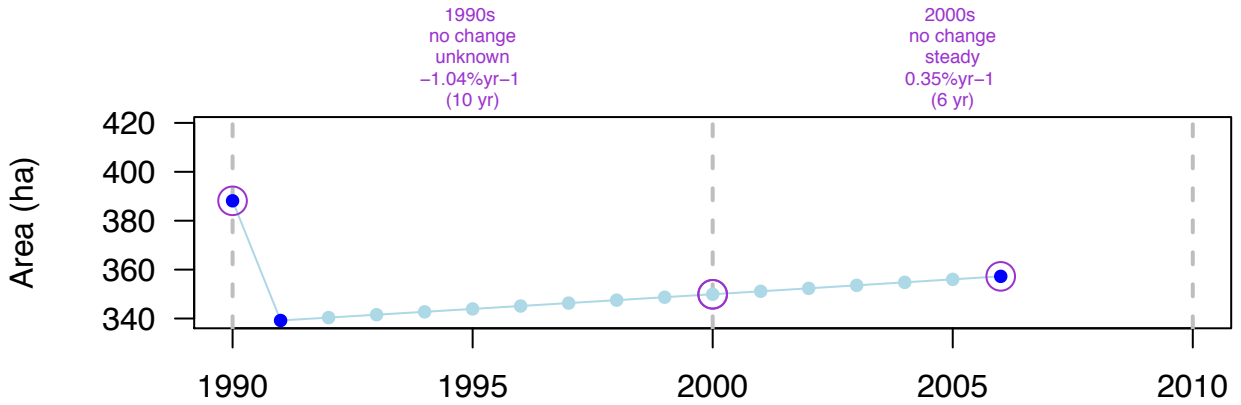

424\_area

Montefalcone et al. 2013

SITE: Pietra Ligure (Italy – Mediterranean) – Po (-9 m)

OVERALL: Net = -64.962 ha; Rate = -13.07 % yr<sup>-1</sup>; Perc Final = 12 % > decrease

DECADAL: YES (16 yr)

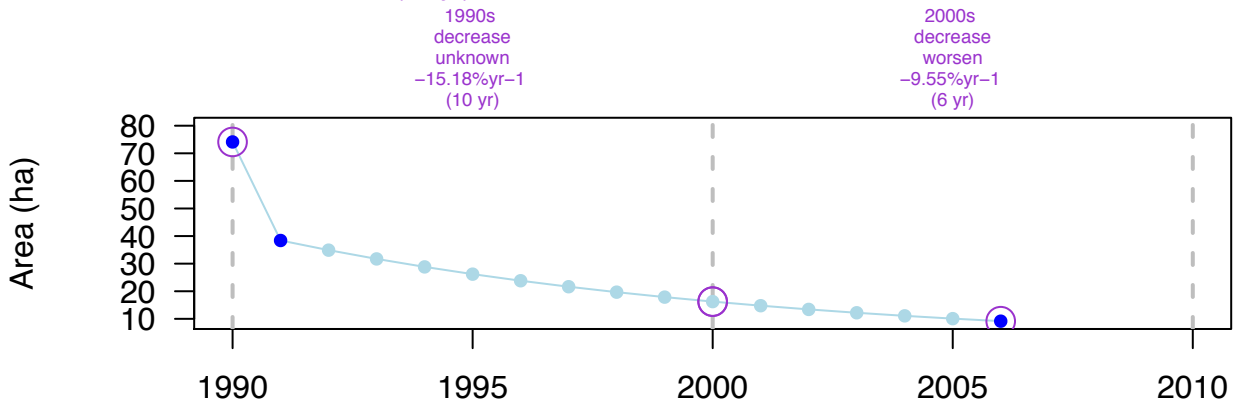



425\_area

Montefalcone et al. 2013

SITE: Noli – Spotorno (Italy – Mediterranean) – Po (-14.2 m)

OVERALL: Net = -23.252 ha; Rate = -5.78 % yr<sup>-1</sup>; Perc Final = 40 % > decrease

DECADAL: YES (16 yr)

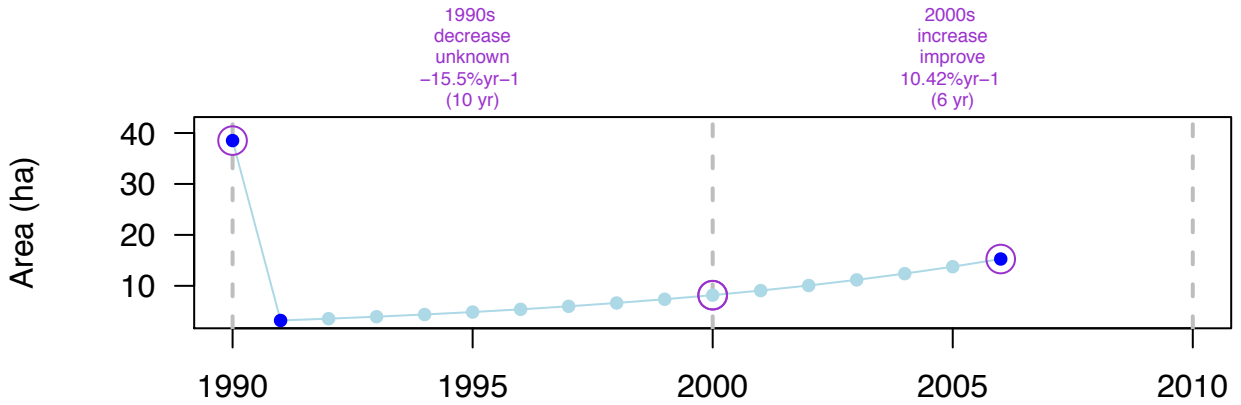

426\_area

Montefalcone et al. 2013

SITE: Isola di Bergoggi (Italy – Mediterranean) – Po (-15.7 m)

OVERALL: Net = -43.359 ha; Rate = -4.88 % yr<sup>-1</sup>; Perc Final = 46 % > decrease

DECADAL: YES (16 yr)

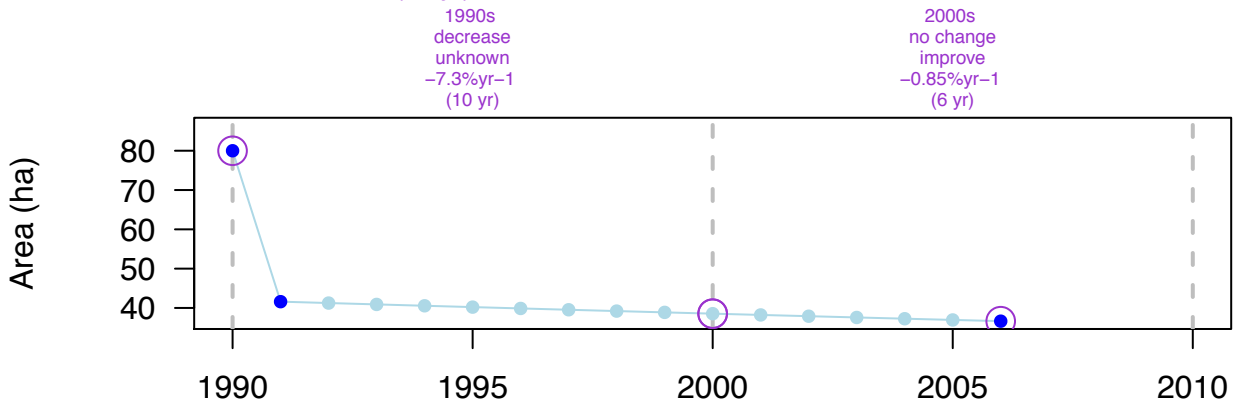

427\_area

Montefalcone et al. 2013

SITE: Vado Ligure (Italy – Mediterranean) – Po (-18.8 m)

OVERALL: Net = -41.3 ha; Rate = -12.81 % yr<sup>-1</sup>; Perc Final = 13 % > decrease

DECADAL: YES (16 yr)

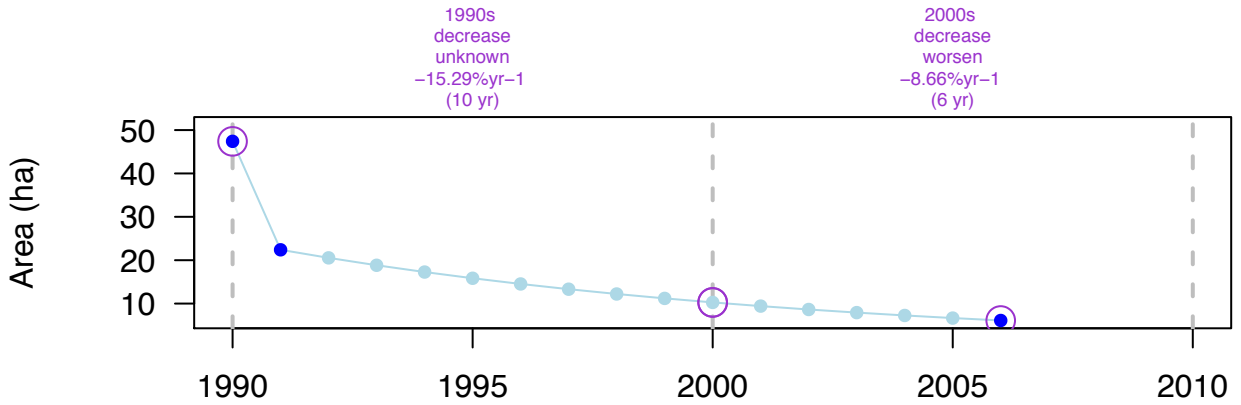

428\_area

Montefalcone et al. 2013

SITE: Savona (Italy – Mediterranean) – Po (? m)

OVERALL: Net = 5.374 ha; Rate = 1.93 % yr<sup>-1</sup>; Perc Final = 134 % > increase

DECADAL: YES (15 yr)

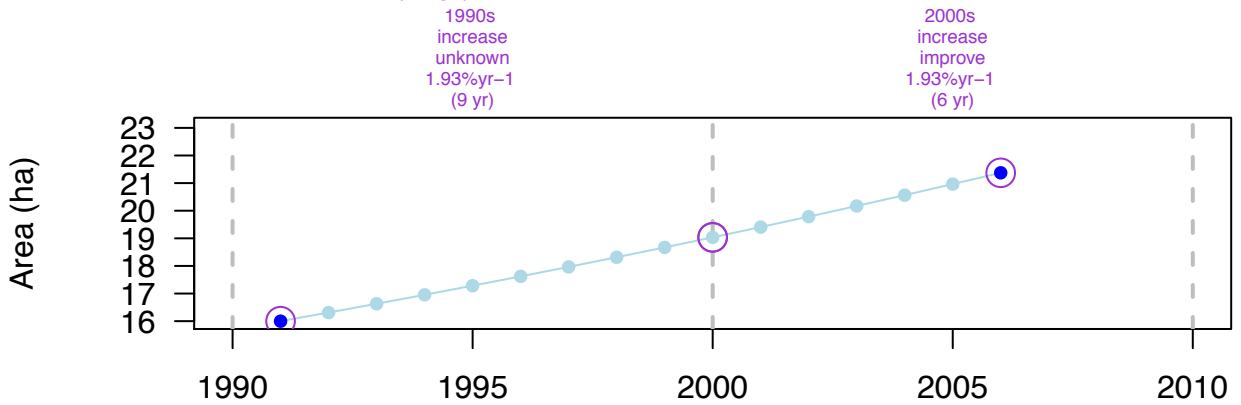

429\_area

Montefalcone et al. 2013

SITE: Albissola Marina – Celle Ligure (Italy – Mediterranean) – Po (? m)

OVERALL: Net = 34.583 ha; Rate = 4.52 % yr<sup>-1</sup>; Perc Final = 206 % > increase

DECADAL: YES (16 yr)

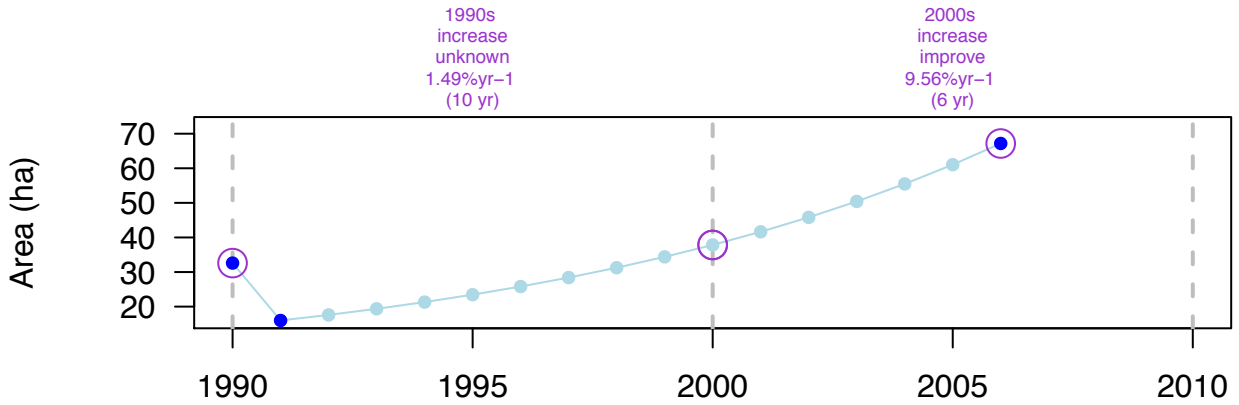

430\_area

Montefalcone et al. 2013

SITE: Arenzano (Italy – Mediterranean) – Po (? m)

OVERALL: Net = 40.082 ha; Rate = 1.9 % yr<sup>-1</sup>; Perc Final = 136 % > increase

DECADAL: YES (16 yr)

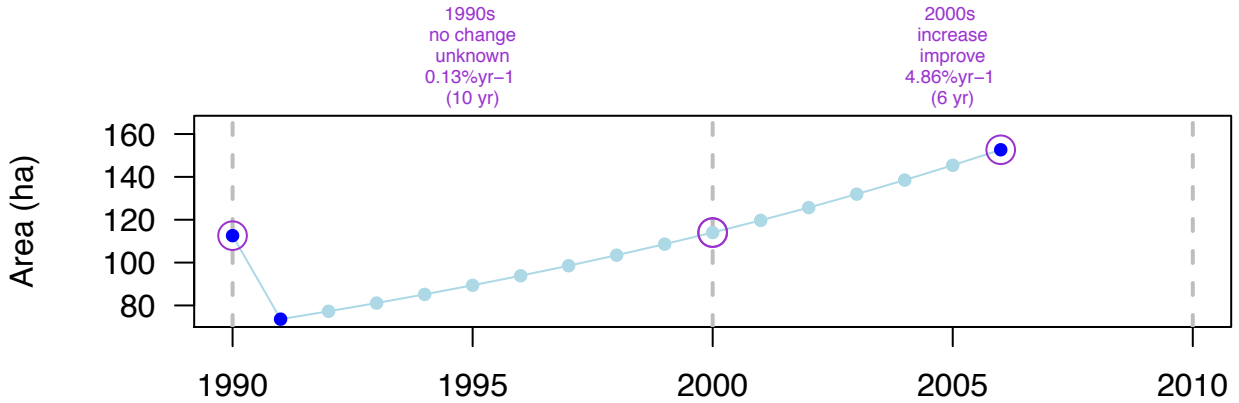

431\_cover

Sandulli et al. 1994, Bianchi et al. 2009, Montefalcone et al. 2007 (a)

SITE: Bergeggi (Italy – Mediterranean) – Cn (-8 m)

OVERALL: Net = -90 %; Rate = NA % yr<sup>-1</sup>; Perc Final = NA % > decrease

DECADAL: YES (17 yr)

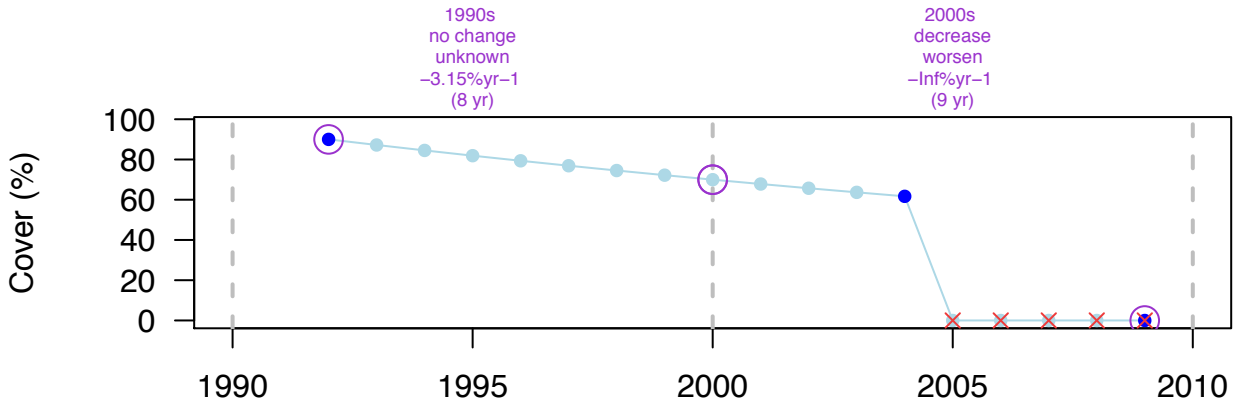

432\_cover

Vetere and Pessani 1989, Sandulli et al. 1994, Montefalcone et al 2007a, Bianchi et al. 2009, Oprandi et al. 2014

SITE: Bergeggi (Italy – Mediterranean) – Po (? m)

OVERALL: Net = 1.4 %; Rate = 0.08 % yr<sup>-1</sup>; Perc Final = 102 % > no change

DECADAL: YES (20 yr)

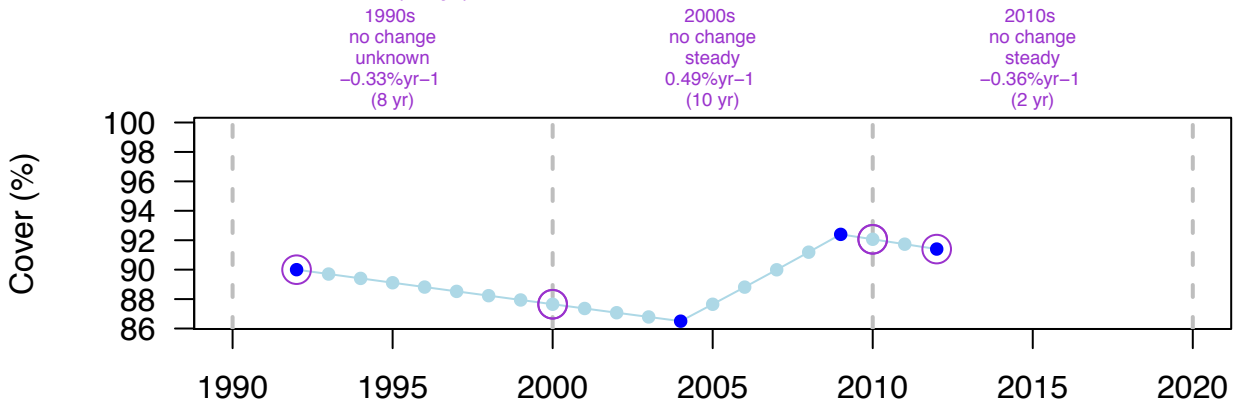

### 432\_lowerlimit

Vetere and Pessani 1989, Sandulli et al. 1994, Montefalcone et al 2007a, Bianchi et al. 2009, Oprandi et al. 2014

SITE: Bergeggi (Italy – Mediterranean) – Po (? m)

OVERALL: Net = 0.3 m; Rate = 0.06 % yr<sup>-1</sup>; Perc Final = 102 % > no change

DECADAL: YES (25 yr)

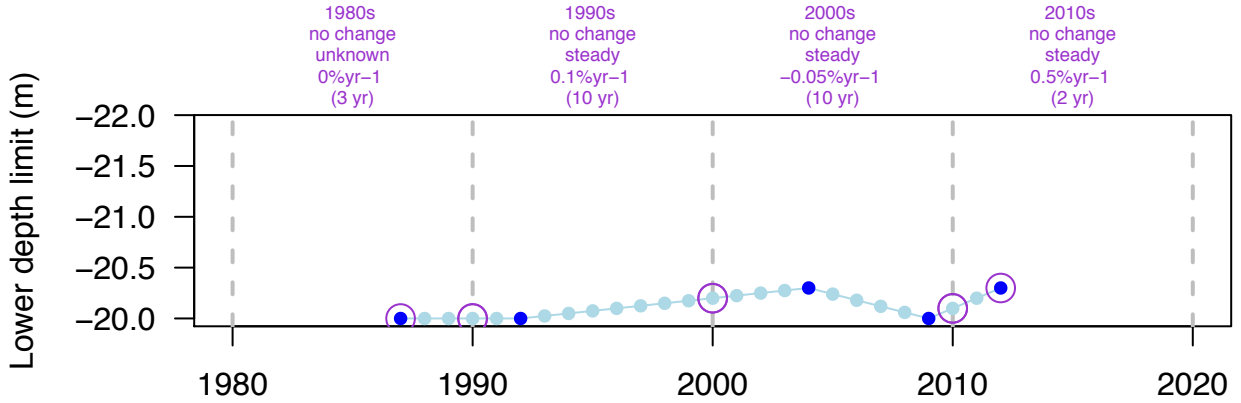

### 432\_upperlimit

Vetere and Pessani 1989, Sandulli et al. 1994, Montefalcone et al 2007a, Bianchi et al. 2009, Oprandi et al. 2014

SITE: Bergeggi (Italy – Mediterranean) – Po (? m)

OVERALL: Net = 1.6 m; Rate = 0.89 % yr<sup>-1</sup>; Perc Final = 125 % > increase

DECADAL: YES (25 yr)

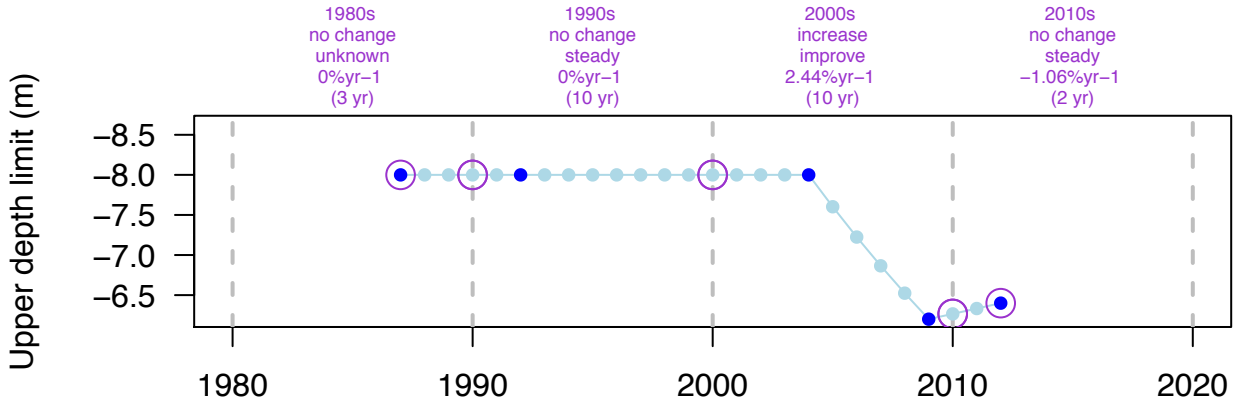

433\_cover

Bianchi and Sandulli 1992, Oprandi et al. 2014

SITE: Noli (Italy – Mediterranean) – Cn (-4 m)

OVERALL: Net = -100 %; Rate = NA % yr<sup>-1</sup>; Perc Final = NA % > decrease

DECADAL: YES (20 yr)

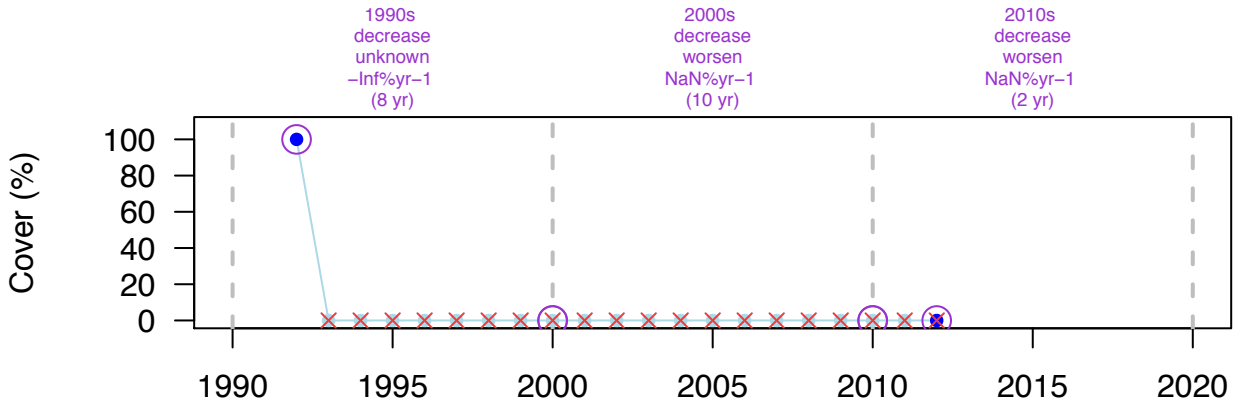

434\_cover

Bianchi and Sandulli 1992, Oprandi et al. 2014

SITE: Noli (Italy – Mediterranean) – Po (? m)

OVERALL: Net = 11 %; Rate = 0.69 % yr<sup>-1</sup>; Perc Final = 115 % > no change

DECADAL: YES (20 yr)

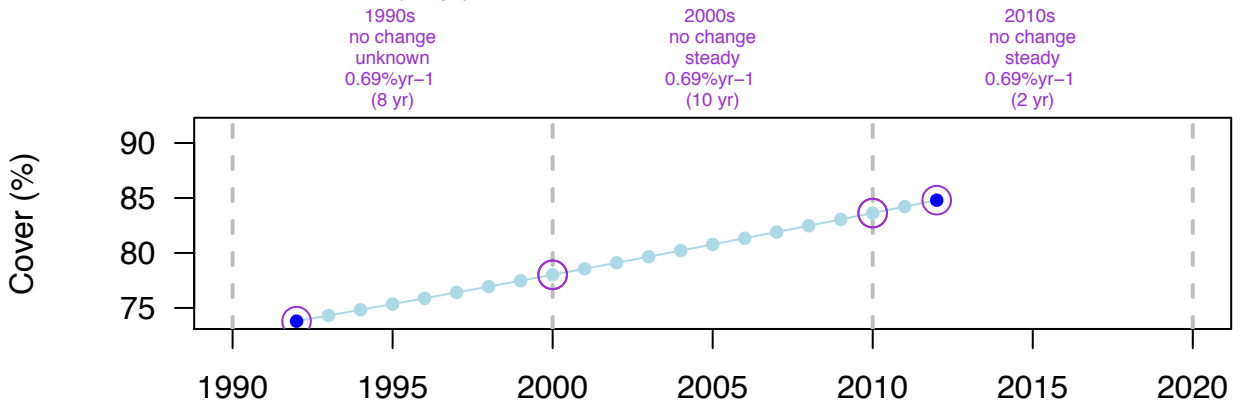

434\_lowerlimit

Bianchi and Sandulli 1992, Oprandi et al. 2014

SITE: Noli (Italy – Mediterranean) – Po (? m)

OVERALL: Net = -1.3 m; Rate = -0.31 % yr<sup>-1</sup>; Perc Final = 94 % > no change

DECADAL: YES (20 yr)

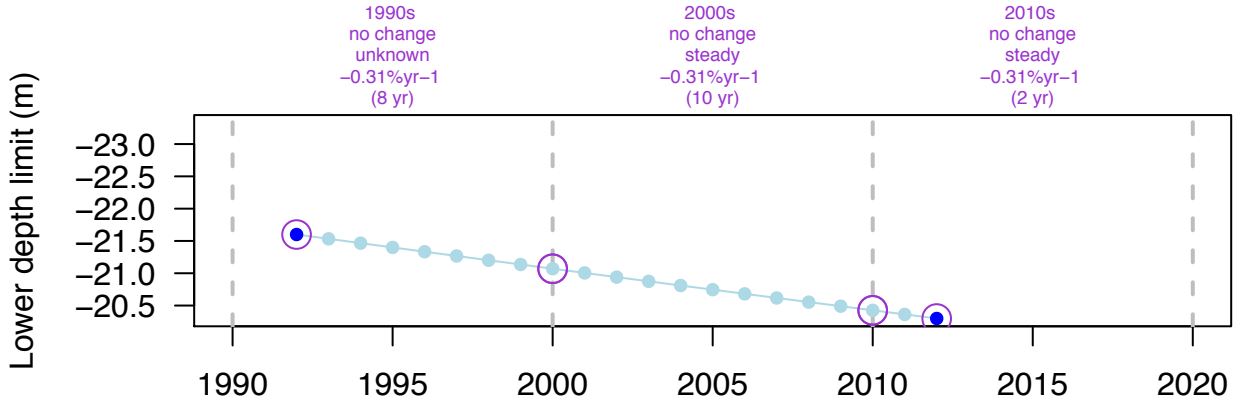

434\_upperlimit

Bianchi and Sandulli 1992, Oprandi et al. 2014

SITE: Noli (Italy – Mediterranean) – Po (? m)

OVERALL: Net = 0 m; Rate = 0 % yr<sup>-1</sup>; Perc Final = 100 % > no change

DECADAL: YES (20 yr)

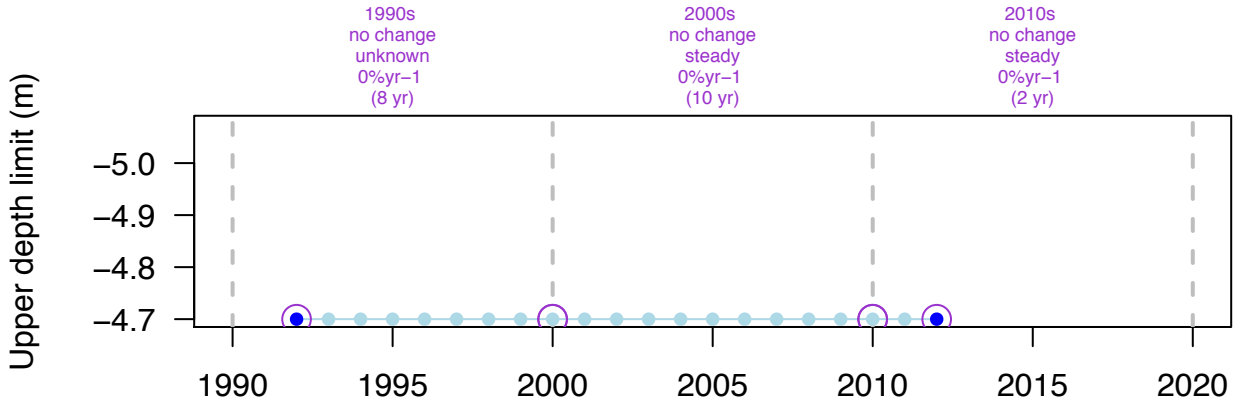

435\_cover

Diviacco 2000, Oprandi et al. 2014, Montefalcone (unpublished)

SITE: Spotorno (Italy – Mediterranean) – Po (? m)

OVERALL: Net = -9.5 %; Rate = -1.22 % yr<sup>-1</sup>; Perc Final = 86 % > no change

DECADAL: YES (12 yr)

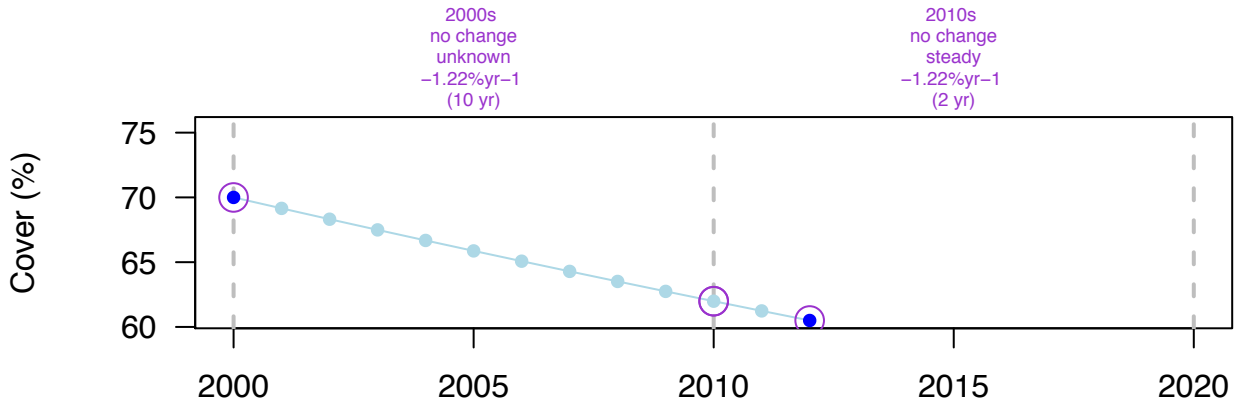

435\_upperlimit

Diviacco 2000, Oprandi et al. 2014, Montefalcone (unpublished)

SITE: Spotorno (Italy – Mediterranean) – Po (? m)

OVERALL: Net = 0.2 m; Rate = 0.67 % yr<sup>-1</sup>; Perc Final = 108 % > no change

DECADAL: YES (12 yr)

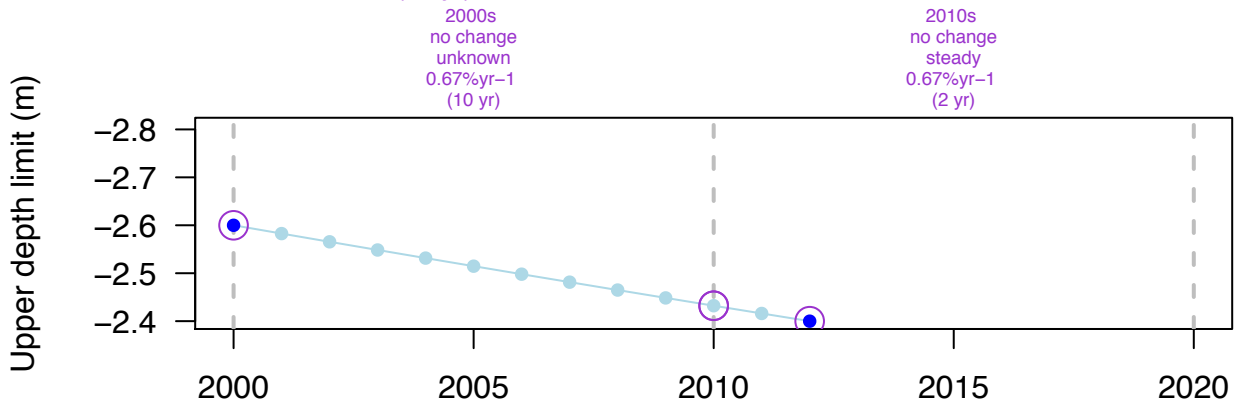



437\_cover

Montefalcone et al. 2007b, Montefalcone (unpublished)

SITE: Prelo (Italy – Mediterranean) – Po (? m)

OVERALL: Net = 17.3 %; Rate = 2.84 % yr<sup>-1</sup>; Perc Final = 133 % > increase

DECADAL: YES (10 yr)

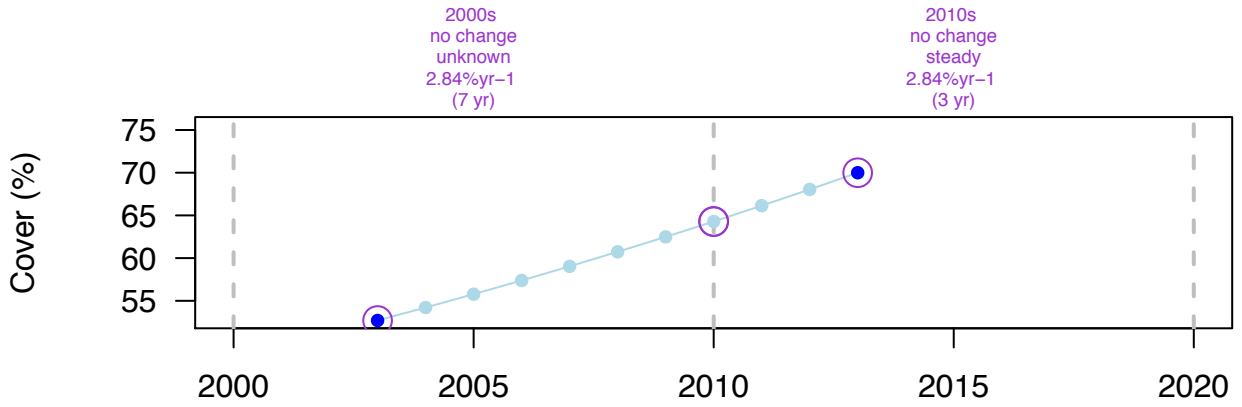

437\_density

Montefalcone et al. 2007b, Montefalcone (unpublished)

SITE: Prelo (Italy – Mediterranean) – Po (? m)

OVERALL: Net = -1 shoot m<sup>-2</sup>; Rate = -0.02 % yr<sup>-1</sup>; Perc Final = 100 % > no change

DECADAL: YES (10 yr)

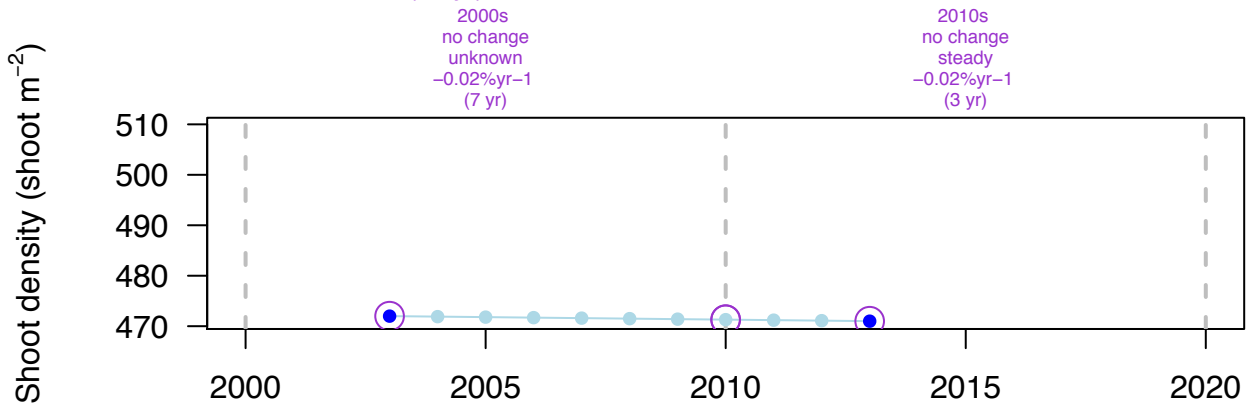

437\_lowerlimit

Montefalcone et al. 2007b, Montefalcone (unpublished)

SITE: Prelo (Italy – Mediterranean) – Po (? m)

OVERALL: Net = -3.7 m; Rate = -3.44 % yr<sup>-1</sup>; Perc Final = 71 % > decrease

DECADAL: YES (10 yr)

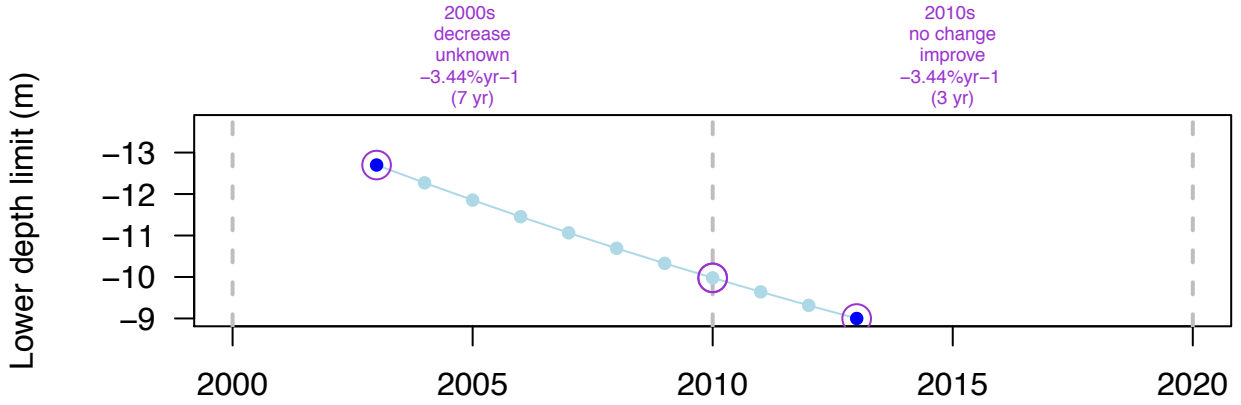

437\_upperlimit

Montefalcone et al. 2007b, Montefalcone (unpublished)

SITE: Prelo (Italy – Mediterranean) – Po (? m)

OVERALL: Net = -0.2 m; Rate = -1.25 % yr<sup>-1</sup>; Perc Final = 88 % > decrease

DECADAL: YES (10 yr)

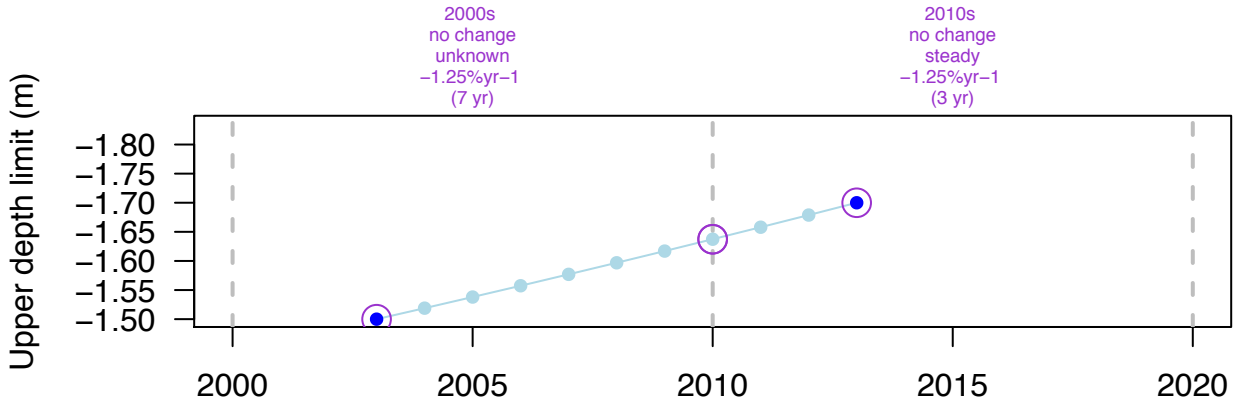

441\_area

Fournier 2002

SITE: Baie de Locquirec (France – Atlantic) – Zm (–4 m)

OVERALL: Net = –1.7 ha; Rate = –2.99 % yr<sup>-1</sup>; Perc Final = 76 % > decrease

DECADAL: YES (9 yr)

1990s  
decrease  
unknown  
–2.99%yr<sup>-1</sup>  
(9 yr)

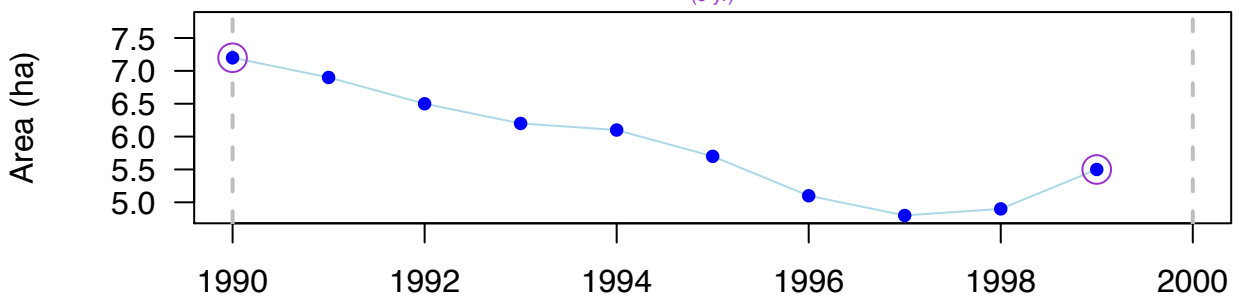

442\_area

Godet et al. 2008, Auby et al. 2010

SITE: Chausey Archipelago (intertidal) (France – Atlantic) – Zm (? m)

OVERALL: Net = –165.5 ha; Rate = –1.18 % yr<sup>-1</sup>; Perc Final = 40 % > decrease

DECADAL: YES (78 yr)

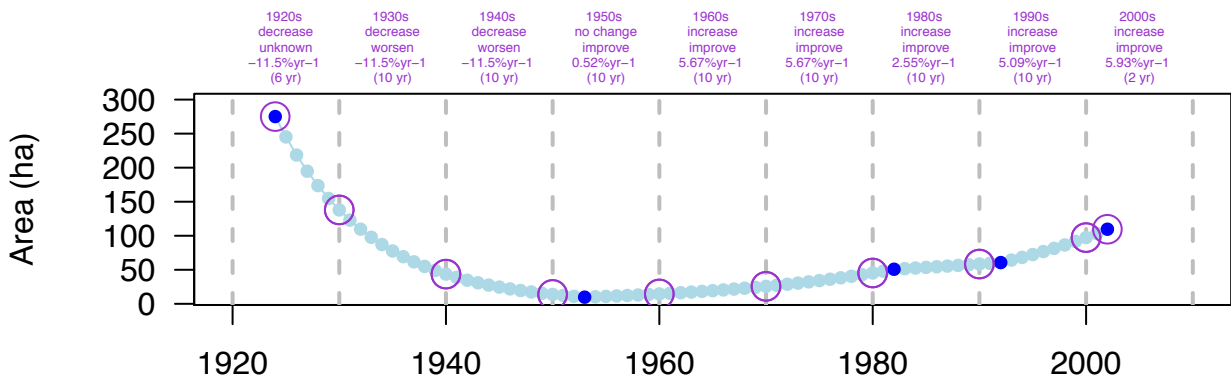

443\_area

Godet et al. 2008, Auby et al. 2010

SITE: Chausey Archipelago (subtidal) (France – Atlantic) – Zm (-4 m)

OVERALL: Net = -256.4 ha; Rate = -0.95 % yr<sup>-1</sup>; Perc Final = 48 % > decrease

DECADAL: YES (78 yr)

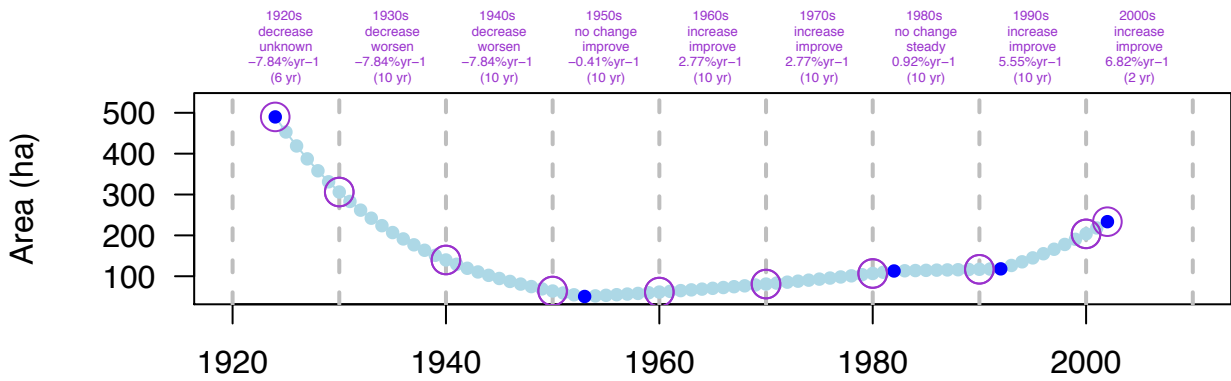

444\_area

Barillé et al. 2010

SITE: Bourgneuf Bay (France – Atlantic) – Zn (? m)

OVERALL: Net = 378 ha; Rate = 7.4 % yr<sup>-1</sup>; Perc Final = 282 % > increase

DECADAL: YES (14 yr)

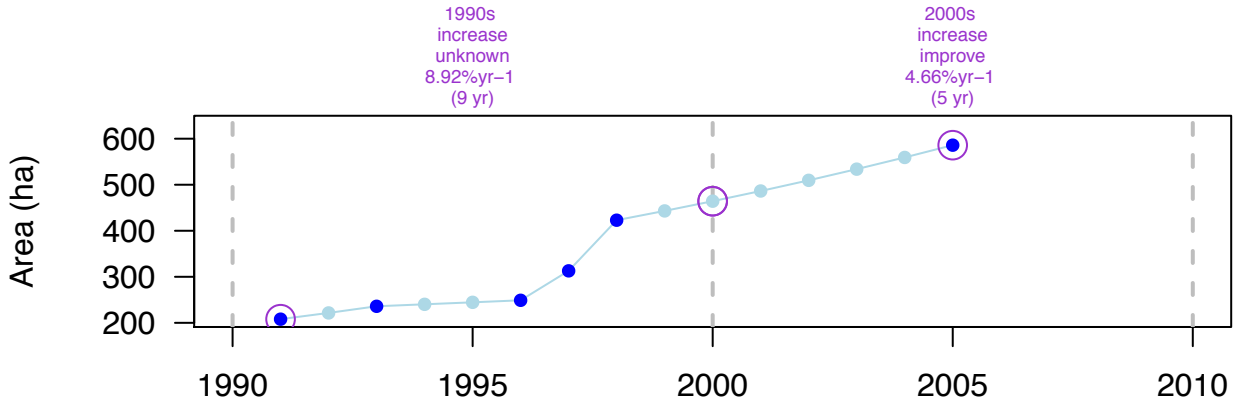

446\_area

Fournier 2003, Nebout et al. 2008

SITE: La Canue (France – Atlantic) – Zn (? m)

OVERALL: Net = -1.15 ha; Rate = -19.9 % yr<sup>-1</sup>; Perc Final = 30 % > decrease

DECADAL: NO (6 yr)

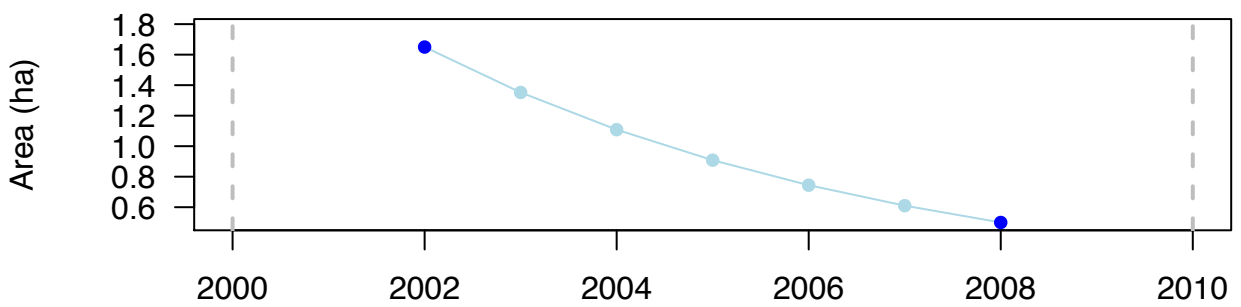

448\_abiomass

Auby et al. 2010

SITE: Arcachon Bay (France – Atlantic) – Zn (0 m)

OVERALL: Net = -27.6 g dw m<sup>-2</sup>; Rate = -1.08 % yr<sup>-1</sup>; Perc Final = 77 % > no change

DECADAL: YES (24 yr)

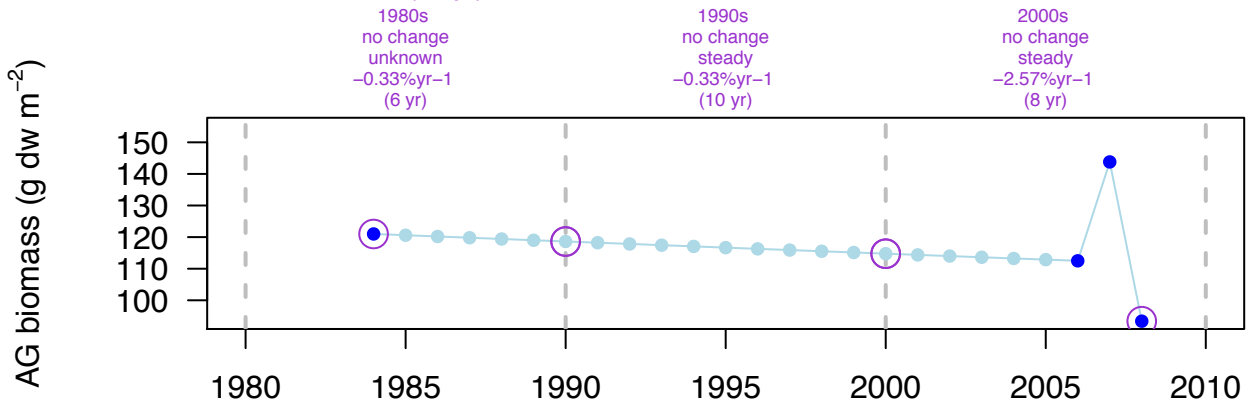

448\_cover

Auby et al. 2010

SITE: Arcachon Bay (France – Atlantic) – Zn (0 m)

OVERALL: Net = 7.5 %; Rate = 0.33 % yr<sup>-1</sup>; Perc Final = 108 % > no change

DECADAL: YES (24 yr)

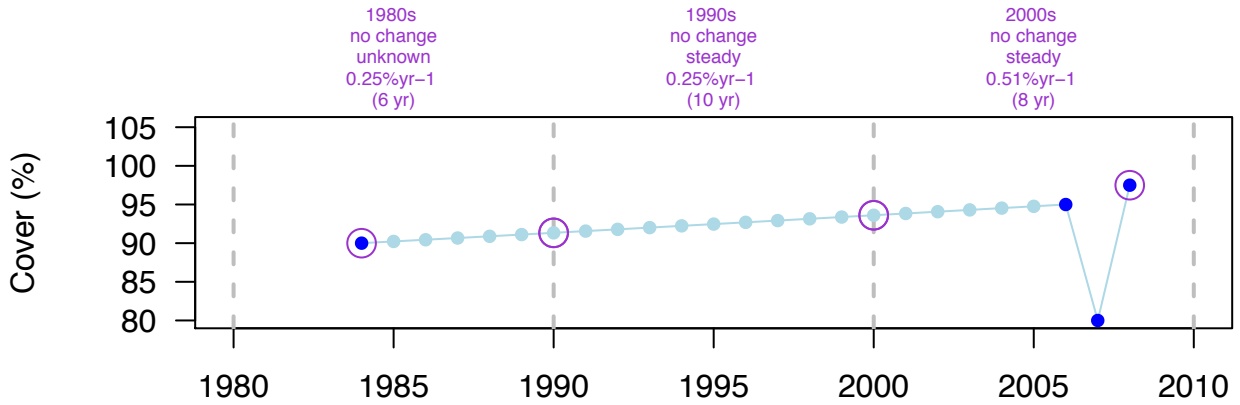

448\_density

Auby et al. 2010

SITE: Arcachon Bay (France – Atlantic) – Zn (0 m)

OVERALL: Net = -3529 shoot m<sup>-2</sup>; Rate = -1.38 % yr<sup>-1</sup>; Perc Final = 72 % > decrease

DECADAL: YES (24 yr)

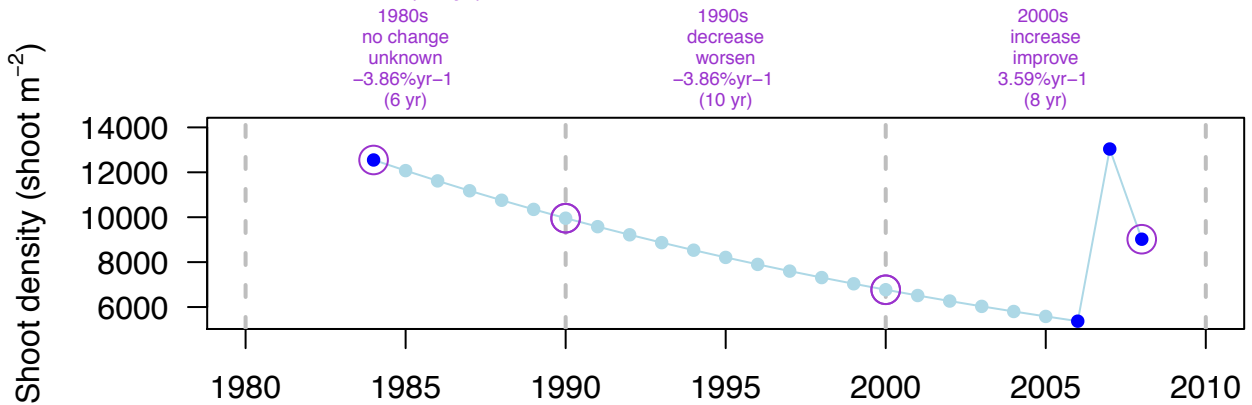

449\_abiomass

Plus et al. 2010

SITE: Arcachon Bay (France – Atlantic) – Zm (-5 m)

OVERALL: Net = 60.3 g dw m<sup>-2</sup>; Rate = 37.2 % yr<sup>-1</sup>; Perc Final = 210 % > increase

DECADAL: NO (2 yr)

AG biomass (g dw m<sup>-2</sup>)

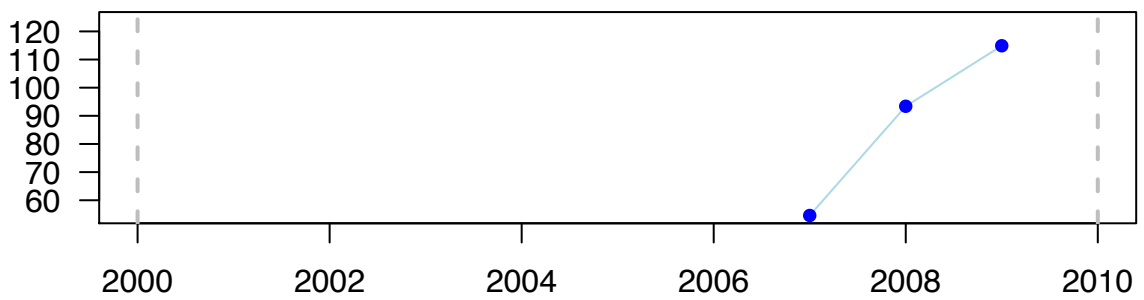

449\_density

Plus et al. 2010

SITE: Arcachon Bay (France – Atlantic) – Zm (-5 m)

OVERALL: Net = 48 shoot m<sup>-2</sup>; Rate = 18.39 % yr<sup>-1</sup>; Perc Final = 144 % > increase

DECADAL: NO (2 yr)

Shoot density (shoot m<sup>-2</sup>)

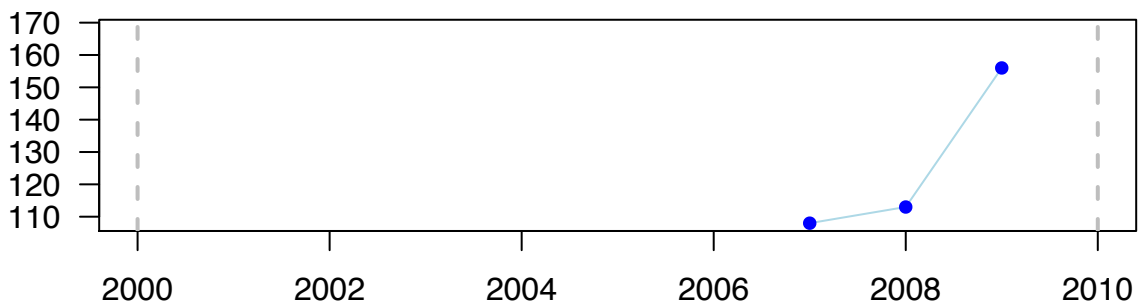

454\_abiomass

Auby et al. 2010

SITE: Callot (Baie de Morlaix) (France – Atlantic) – Zm (? m)

OVERALL: Net = -56.6 g dw m<sup>-2</sup>; Rate = -11.93 % yr<sup>-1</sup>; Perc Final = 55 % > decrease

DECADAL: NO (5 yr)

AG biomass (g dw m<sup>-2</sup>)

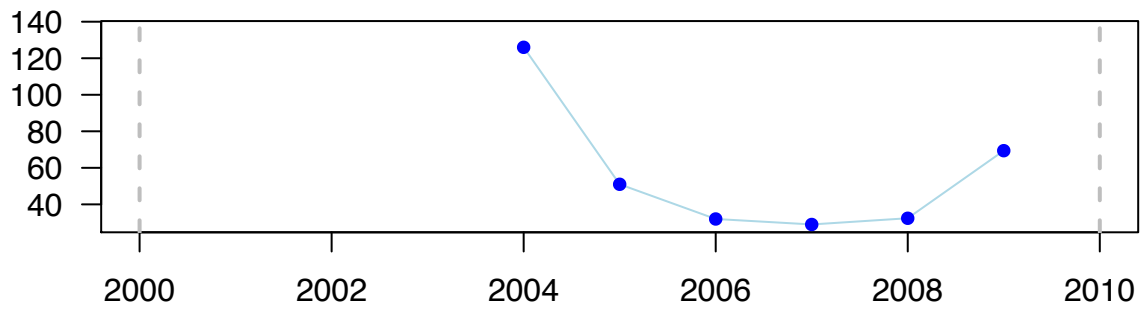

454\_density

Auby et al. 2010

SITE: Callot (Baie de Morlaix) (France – Atlantic) – Zm (? m)

OVERALL: Net = 1 shoot m<sup>-2</sup>; Rate = 0.07 % yr<sup>-1</sup>; Perc Final = 100 % > no change

DECADAL: NO (5 yr)

Shoot density (shoot m<sup>-2</sup>)

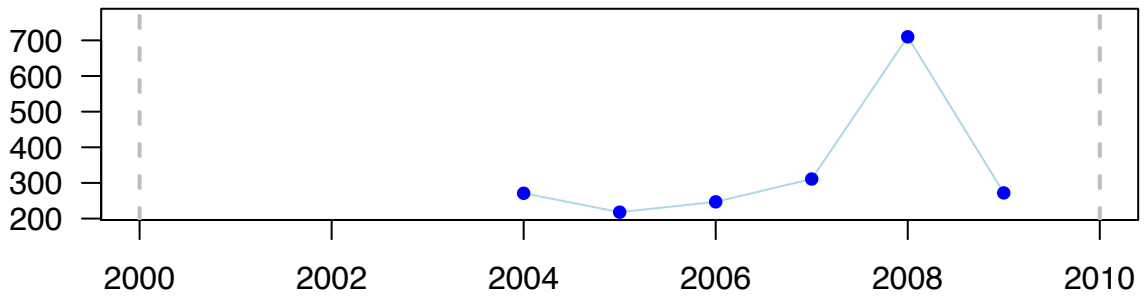



469\_abiomass

Auby et al. 2010

SITE: Concarneau (Glenan Archipelago) (France – Atlantic) – Zm (? m)

OVERALL: Net = 37.2 g dw m<sup>-2</sup>; Rate = 23.29 % yr<sup>-1</sup>; Perc Final = 159 % > increase

DECADAL: NO (2 yr)

AG biomass (g dw m<sup>-2</sup>)

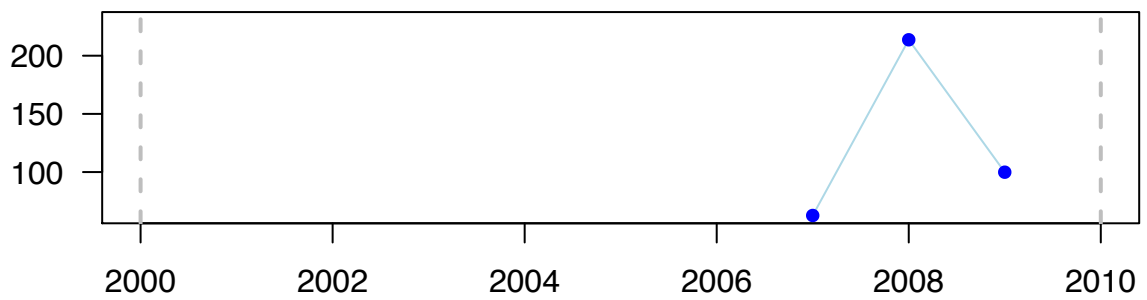

469\_density

Auby et al. 2010

SITE: Concarneau (Glenan Archipelago) (France – Atlantic) – Zm (? m)

OVERALL: Net = -128 shoot m<sup>-2</sup>; Rate = -11.6 % yr<sup>-1</sup>; Perc Final = 79 % > no change

DECADAL: NO (2 yr)

Shoot density (shoot m<sup>-2</sup>)

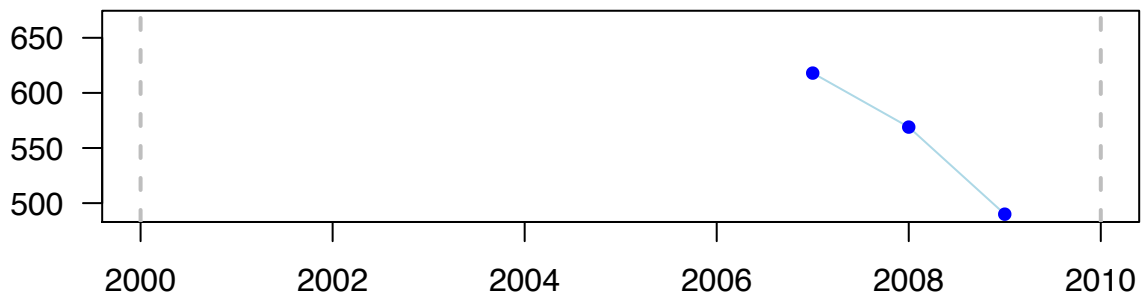

### 473\_area

Nebout et al. 2008, Auby et al. 2010

SITE: Plage de L'Ecluse (France – Atlantic) – Zm (? m)

OVERALL: Net = 10.2 ha; Rate = 4.17 % yr<sup>-1</sup>; Perc Final = 803 % > increase

DECADAL: YES (50 yr)

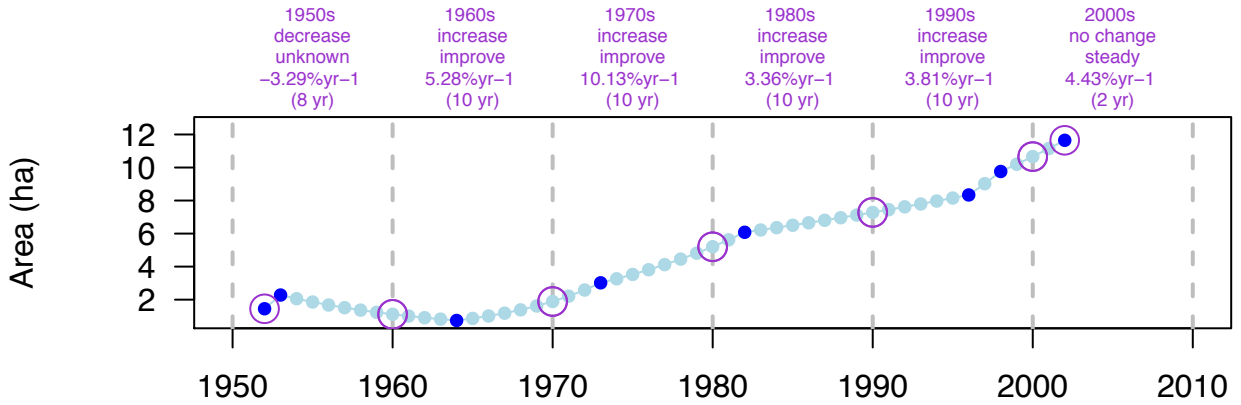

### 473\_cover

Nebout et al. 2008, Auby et al. 2010

SITE: Plage de L'Ecluse (France – Atlantic) – Zm (? m)

OVERALL: Net = 0 %; Rate = 0 % yr<sup>-1</sup>; Perc Final = 100 % > no change

DECADAL: YES (50 yr)

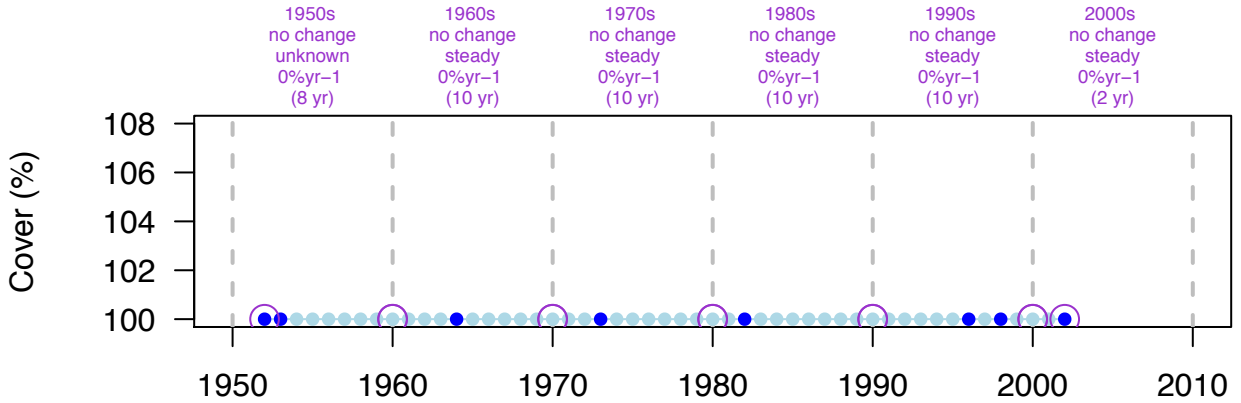

474\_area

Nebout et al. 2008, Auby et al. 2010

SITE: Baie du Prieuré (France – Atlantic) – Zm (? m)

OVERALL: Net = 0.13 ha; Rate = 0.03 % yr<sup>-1</sup>; Perc Final = 101 % > no change

DECADAL: YES (50 yr)

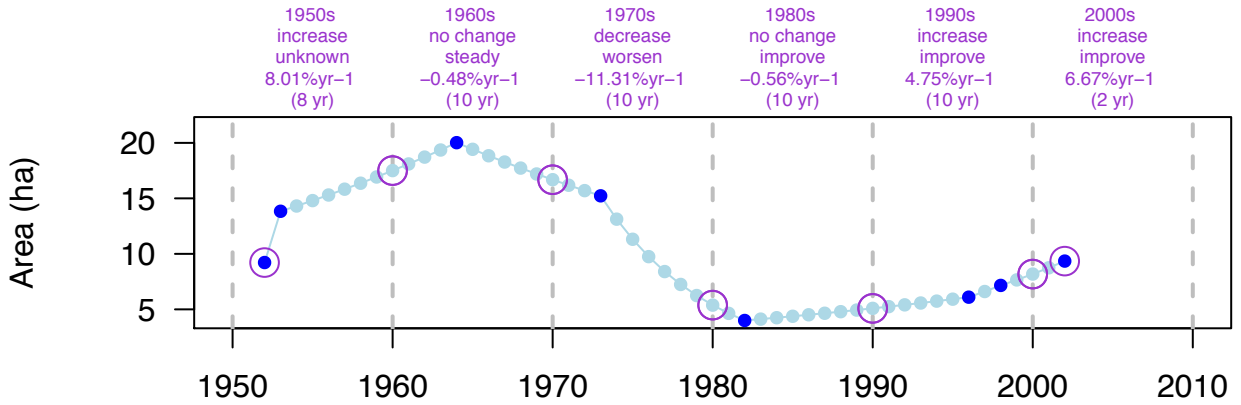

474\_cover

Nebout et al. 2008, Auby et al. 2010

SITE: Baie du Prieuré (France – Atlantic) – Zm (? m)

OVERALL: Net = 0 %; Rate = 0 % yr<sup>-1</sup>; Perc Final = 100 % > no change

DECADAL: YES (50 yr)

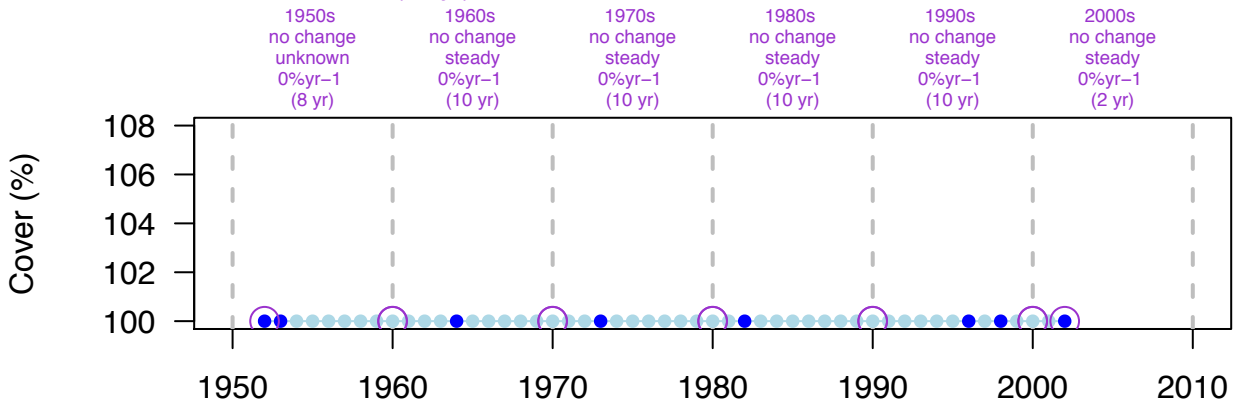

475\_abiomass

Auby et al. 2010

SITE: Estuaire Bidassoa (France – Atlantic) – Zn (? m)

OVERALL: Net = 15.42 g dw m<sup>-2</sup>; Rate = 19.94 % yr<sup>-1</sup>; Perc Final = 149 % > increase

DECADAL: NO (2 yr)

AG biomass (g dw m<sup>-2</sup>)

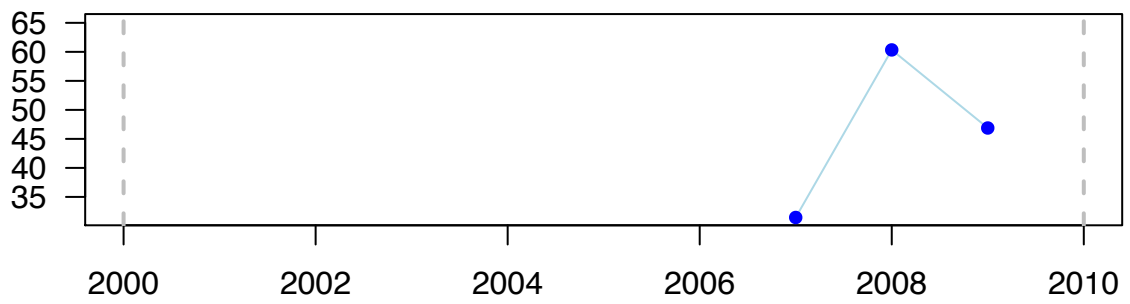

475\_cover

Auby et al. 2010

SITE: Estuaire Bidassoa (France – Atlantic) – Zn (? m)

OVERALL: Net = 0 %; Rate = 0 % yr<sup>-1</sup>; Perc Final = 100 % > no change

DECADAL: NO (2 yr)

Cover (%)

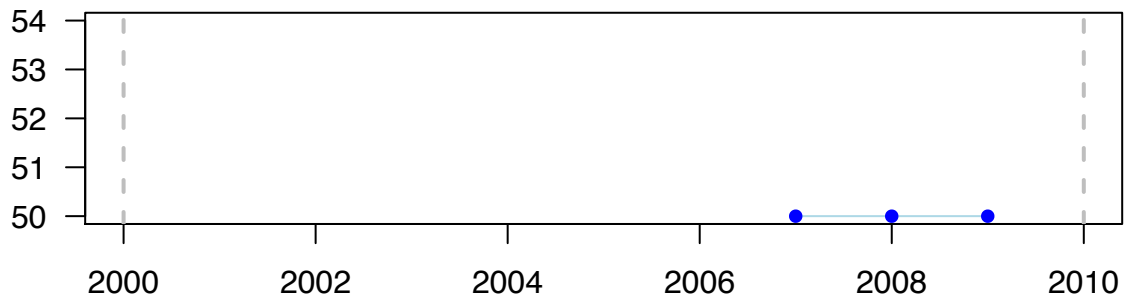

475\_density

Auby et al. 2010

SITE: Estuaire Bidassoa (France – Atlantic) – Zn (? m)

OVERALL: Net = 2375 shoot m<sup>-2</sup>; Rate = 23.14 % yr<sup>-1</sup>; Perc Final = 159 % > increase

DECADAL: NO (2 yr)

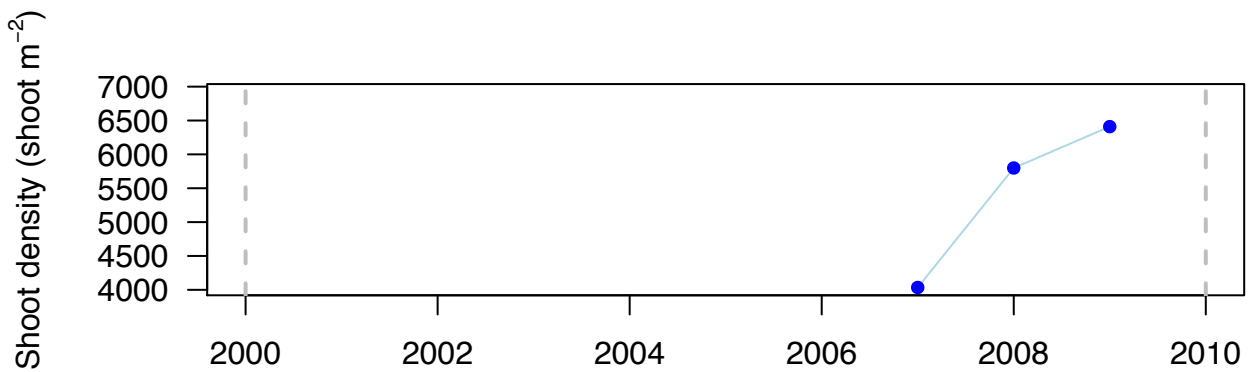

476\_area

Auby et al. 2010

SITE: Estuaire Bidassoa (France – Atlantic) – Zn (? m)

OVERALL: Net = -7.04 ha; Rate = -5.34 % yr<sup>-1</sup>; Perc Final = 19 % > decrease

DECADAL: YES (31 yr)

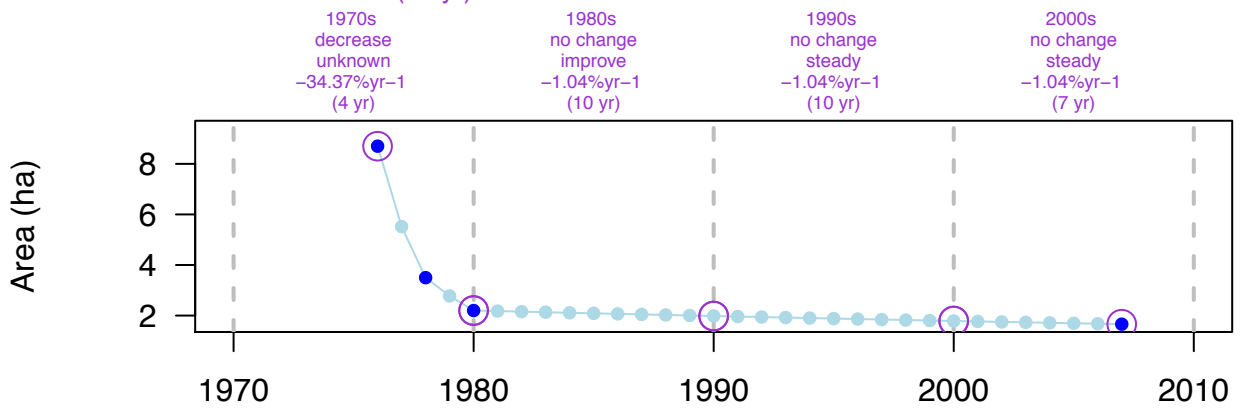

480\_area

Auby et al. 2010

SITE: Golfe du Morbihan (France – Atlantic) – Zn (0 m)

OVERALL: Net = -517 ha; Rate = -1.15 % yr<sup>-1</sup>; Perc Final = 58 % > decrease

DECADAL: YES (47 yr)

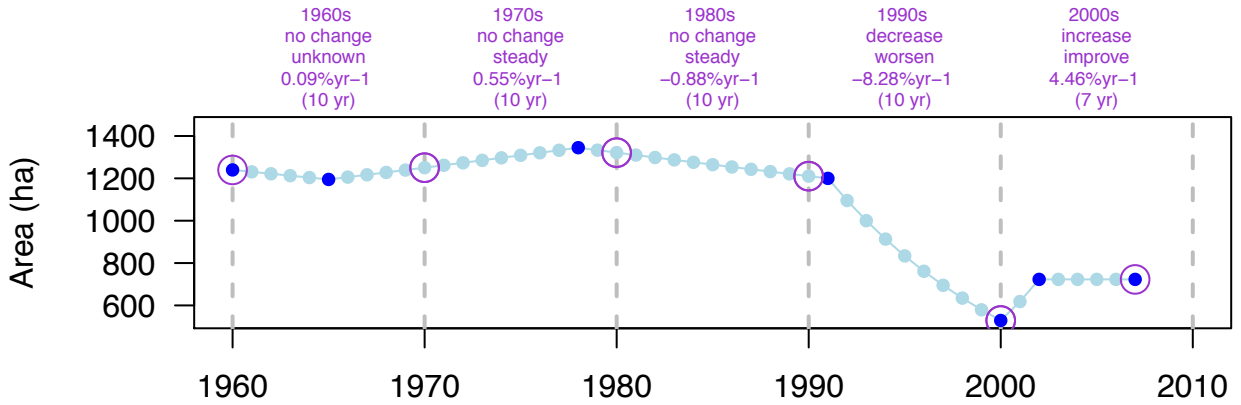

481\_area

Auby et al. 2010

SITE: Golfe du Morbihan (France – Atlantic) – Zm (0 m)

OVERALL: Net = -2422 ha; Rate = -1.64 % yr<sup>-1</sup>; Perc Final = 31 % > decrease

DECADAL: YES (72 yr)

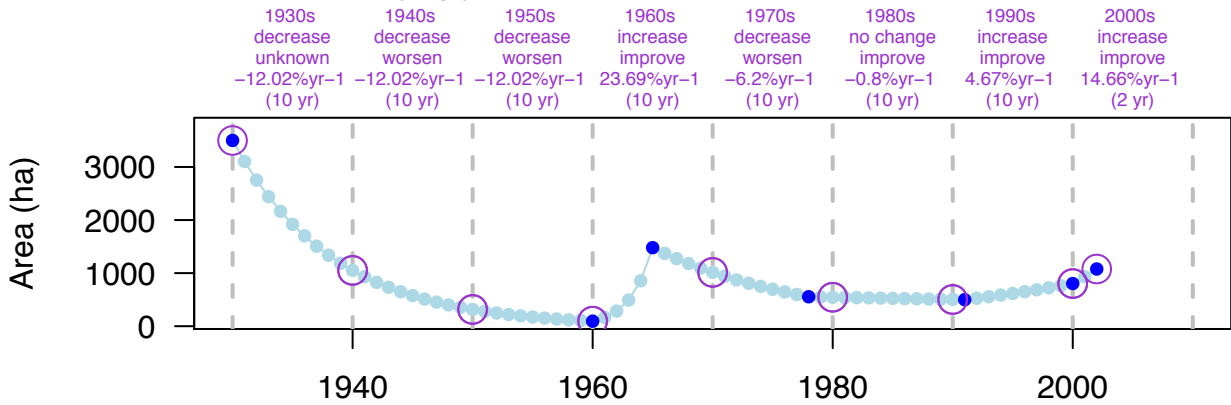

482\_area

Auby et al. 2010

SITE: Ouest Cotentin (France – Atlantic) – Zm (? m)

OVERALL: Net = -728 ha; Rate = -6.94 % yr<sup>-1</sup>; Perc Final = 18 % > decrease

DECADAL: YES (25 yr)

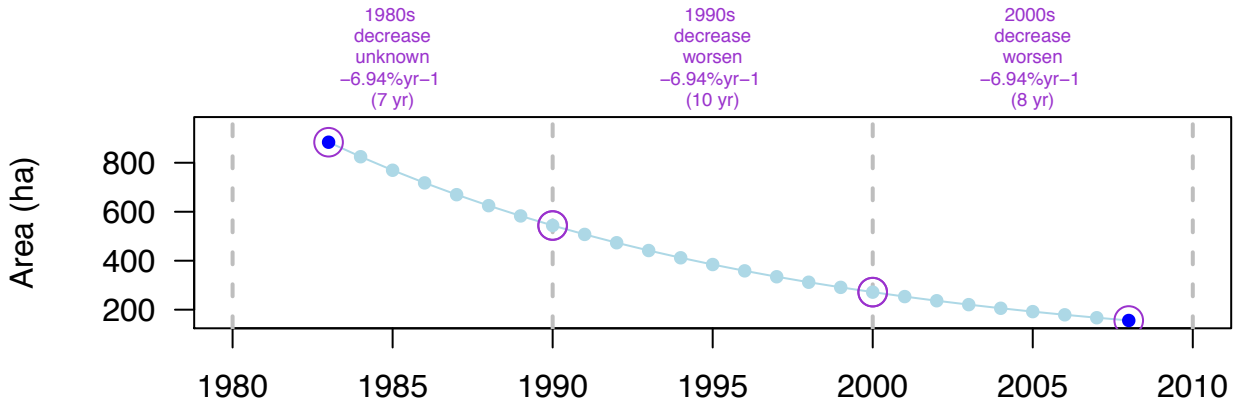

487\_abiomass

Auby et al. 2010

SITE: Molène (France – Atlantic) – Zm (? m)

OVERALL: Net = -83.2 g dw m<sup>-2</sup>; Rate = -12.41 % yr<sup>-1</sup>; Perc Final = 54 % > decrease

DECADAL: NO (5 yr)

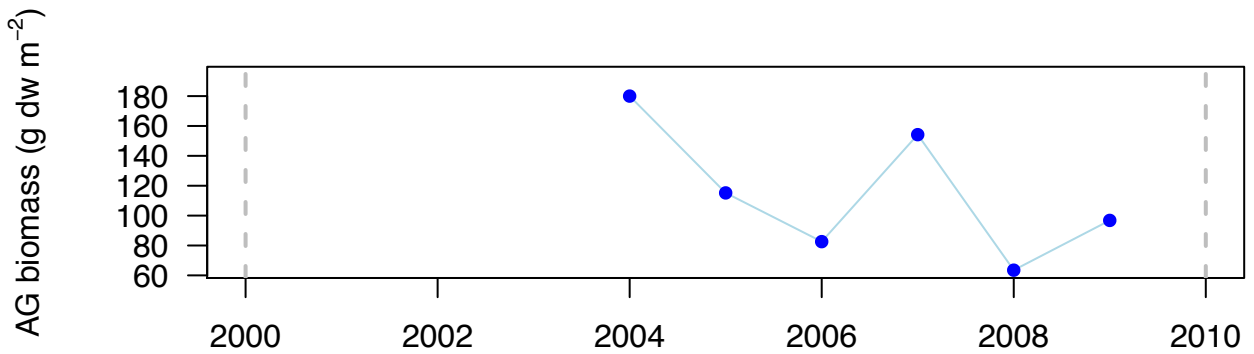

487\_density

Auby et al. 2010

SITE: Molène (France – Atlantic) – Zm (? m)

OVERALL: Net = -48 shoot m<sup>-2</sup>; Rate = -5.05 % yr<sup>-1</sup>; Perc Final = 78 % > no change

DECADAL: NO (5 yr)

Shoot density (shoot m<sup>-2</sup>)

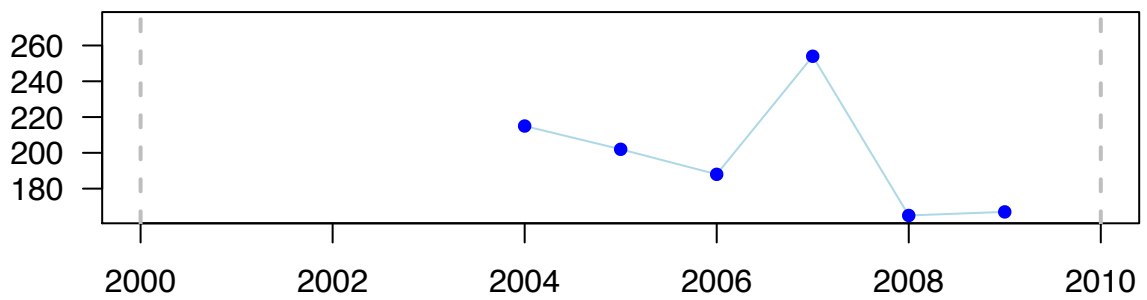

496\_area

Auby et al. 2010

SITE: Lac d'Hossegor (France – Atlantic) – Zn (? m)

OVERALL: Net = 0.46 ha; Rate = NA % yr<sup>-1</sup>; Perc Final = NA % > increase

DECADAL: YES (41 yr)

Area (ha)

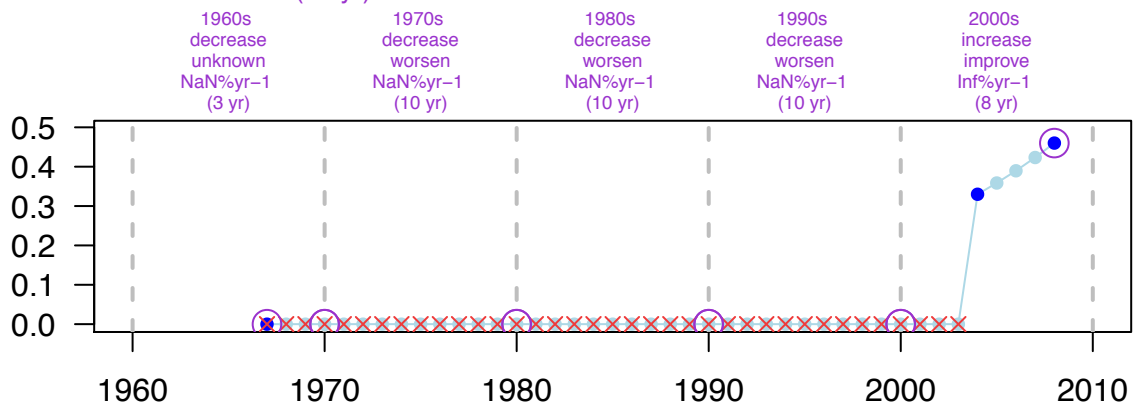



497\_area

Auby et al. 2010

SITE: Lac d'Hossegor (France – Atlantic) – Zm (? m)

OVERALL: Net = 0.47 ha; Rate = NA % yr<sup>-1</sup>; Perc Final = NA % > increase

DECADAL: YES (41 yr)

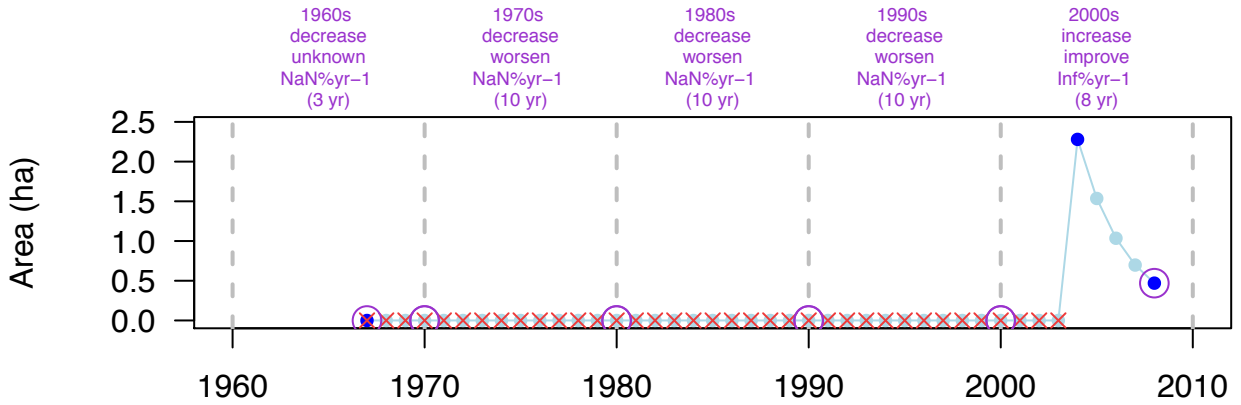

506\_area

Auby et al. 2010

SITE: L'estuaire du Lay (France – Atlantic) – Zn (? m)

OVERALL: Net = 17.6 ha; Rate = NA % yr<sup>-1</sup>; Perc Final = NA % > increase

DECADAL: NO (4 yr)

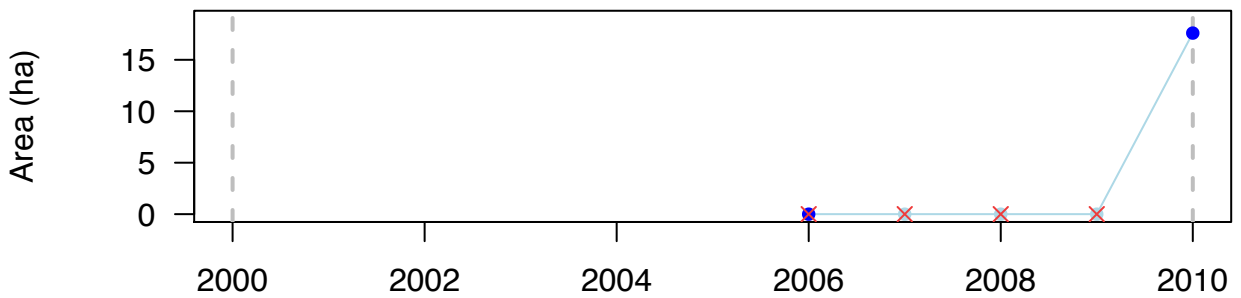

507\_abiomass

Auby et al. 2010

SITE: Sainte-Marquerite (France – Atlantic) – Zm (? m)

OVERALL: Net = -19 g dw m<sup>-2</sup>; Rate = -4.86 % yr<sup>-1</sup>; Perc Final = 78 % > no change

DECADAL: NO (5 yr)

AG biomass (g dw m<sup>-2</sup>)

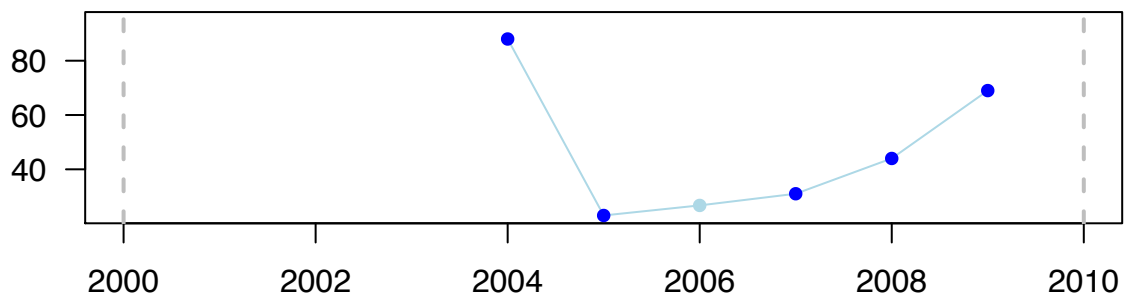

507\_density

Auby et al. 2010

SITE: Sainte-Marquerite (France – Atlantic) – Zm (? m)

OVERALL: Net = -288 shoot m<sup>-2</sup>; Rate = -19.18 % yr<sup>-1</sup>; Perc Final = 38 % > decrease

DECADAL: NO (5 yr)

Shoot density (shoot m<sup>-2</sup>)

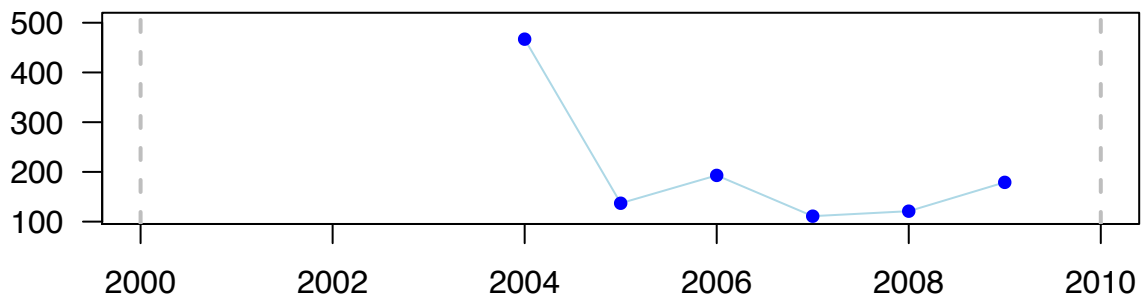

519\_abiomass

Auby et al. 2010

SITE: Paimpol (France – Atlantic) – Zm (? m)

OVERALL: Net = 11.2 g dw m<sup>-2</sup>; Rate = 2.74 % yr<sup>-1</sup>; Perc Final = 115 % > no change

DECADAL: NO (5 yr)

AG biomass (g dw m<sup>-2</sup>)

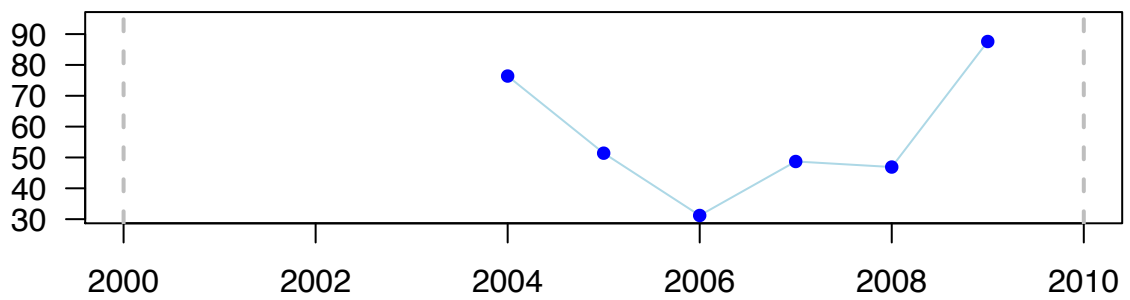

519\_density

Auby et al. 2010

SITE: Paimpol (France – Atlantic) – Zm (? m)

OVERALL: Net = -330 shoot m<sup>-2</sup>; Rate = -17.11 % yr<sup>-1</sup>; Perc Final = 43 % > decrease

DECADAL: NO (5 yr)

Shoot density (shoot m<sup>-2</sup>)

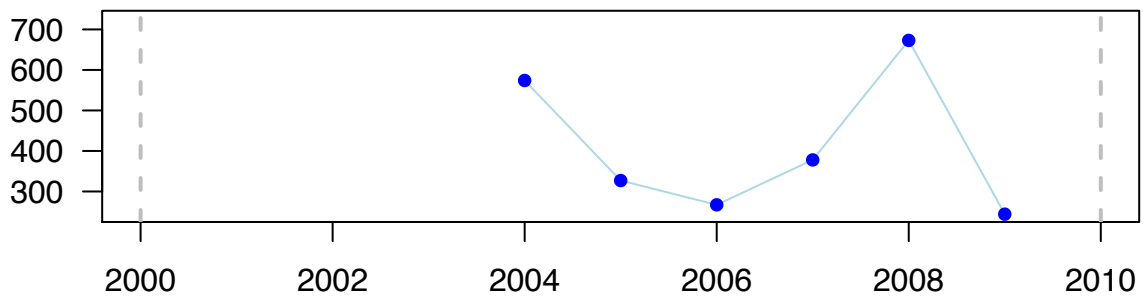

520\_abiomass

Auby et al. 2010

SITE: Les Sept Îles (France – Atlantic) – Zm (? m)

OVERALL: Net =  $-36.9 \text{ g dw m}^{-2}$ ; Rate =  $-15.54 \text{ \% yr}^{-1}$ ; Perc Final = 73 % > decrease

DECADAL: NO (2 yr)

AG biomass ( $\text{g dw m}^{-2}$ )

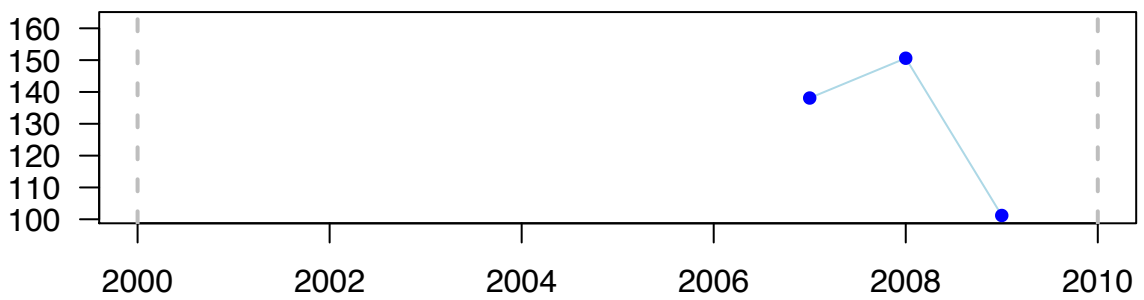

520\_density

Auby et al. 2010

SITE: Les Sept Îles (France – Atlantic) – Zm (? m)

OVERALL: Net =  $-56 \text{ shoot m}^{-2}$ ; Rate =  $-4.03 \text{ \% yr}^{-1}$ ; Perc Final = 92 % > no change

DECADAL: NO (2 yr)

Shoot density ( $\text{shoot m}^{-2}$ )

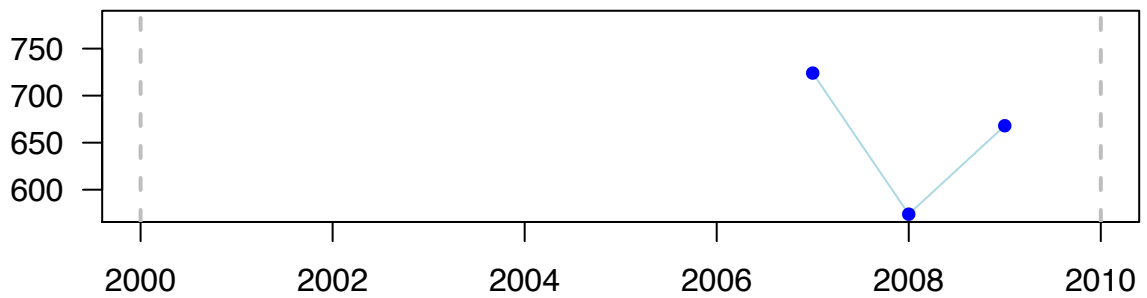

521\_area

Auby et al. 2010

SITE: Pertuis Breton (France – Atlantic) – Zn (? m)

OVERALL: Net = -504.6 ha; Rate = -2.73 % yr<sup>-1</sup>; Perc Final = 9 % > decrease

DECADAL: YES (90 yr)

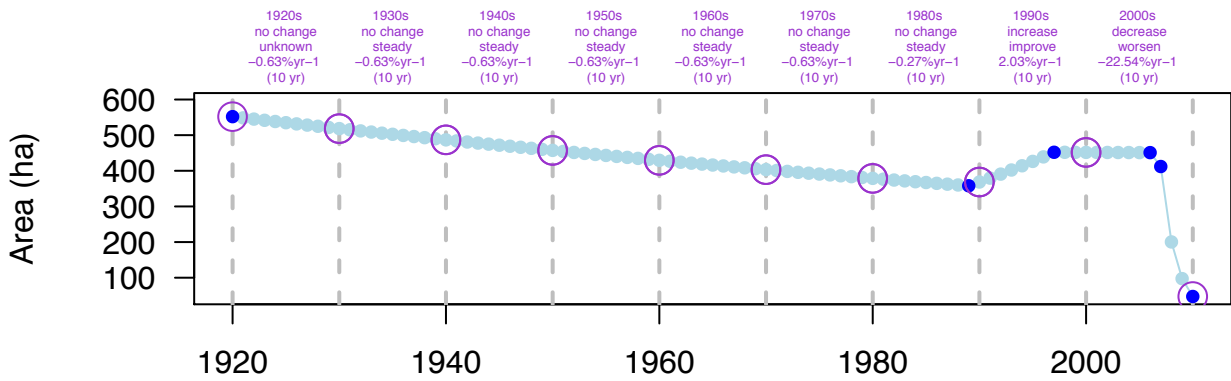

522\_area

Auby et al. 2010

SITE: Pertuis Breton (France – Atlantic) – Zm (? m)

OVERALL: Net = -591.45 ha; Rate = NA % yr<sup>-1</sup>; Perc Final = NA % > decrease

DECADAL: YES (74 yr)

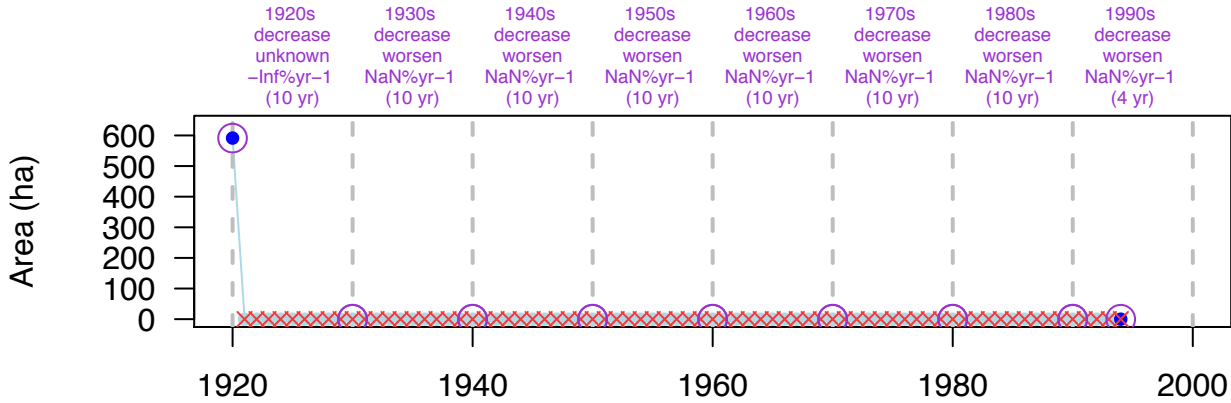

523\_abiomass

Auby et al. 2010

SITE: Les Doux (Pertuis Charentais) (France – Atlantic) – Zn (? m)

OVERALL: Net = 17.1 g dw m<sup>-2</sup>; Rate = 3.27 % yr<sup>-1</sup>; Perc Final = 134 % > increase

DECADAL: YES (9 yr)

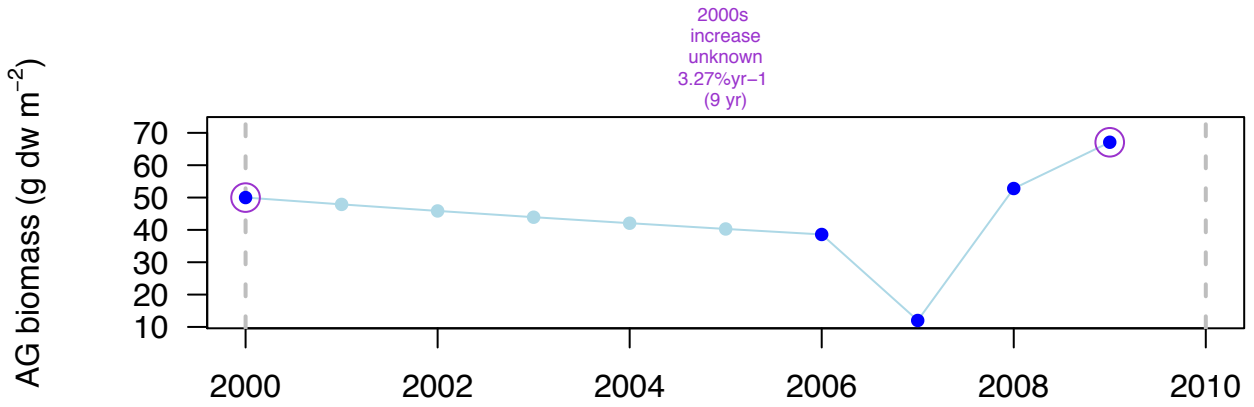

523\_density

Auby et al. 2010

SITE: Les Doux (Pertuis Charentais) (France – Atlantic) – Zn (? m)

OVERALL: Net = 2934 shoot m<sup>-2</sup>; Rate = 24.48 % yr<sup>-1</sup>; Perc Final = 163 % > increase

DECADAL: NO (2 yr)

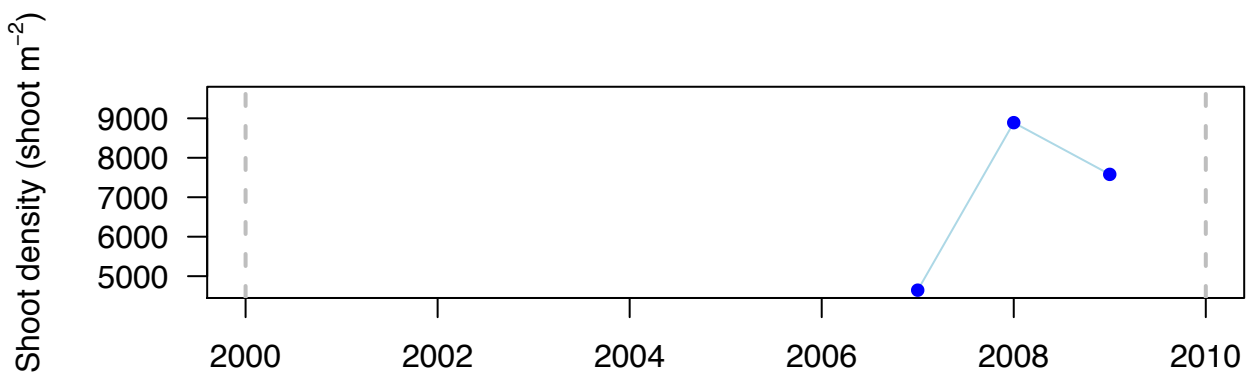

531\_area

Auby et al. 2010

SITE: Rade de Brest (France – Atlantic) – Zm (? m)

OVERALL: Net = 60.3 ha; Rate = 20.36 % yr<sup>-1</sup>; Perc Final = 1730 % > increase

DECADAL: YES (14 yr)

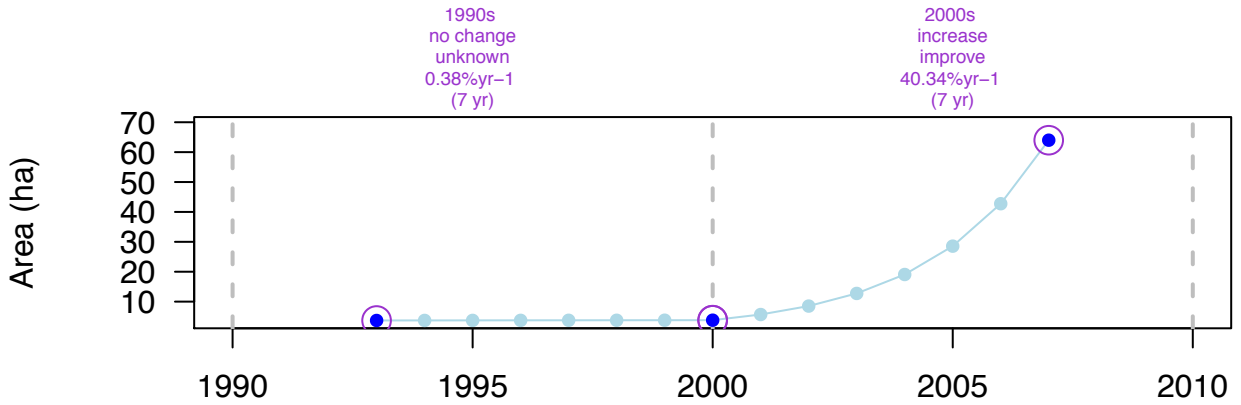

556\_density

Marbà and Duarte 2010, Duarte and Marbà (unpublished)

SITE: El Castell (Spain – Mediterranean) – Po (-25 m)

OVERALL: Net = -84.38 shoot m<sup>-2</sup>; Rate = -6.85 % yr<sup>-1</sup>; Perc Final = 47 % > decrease

DECADAL: YES (11 yr)

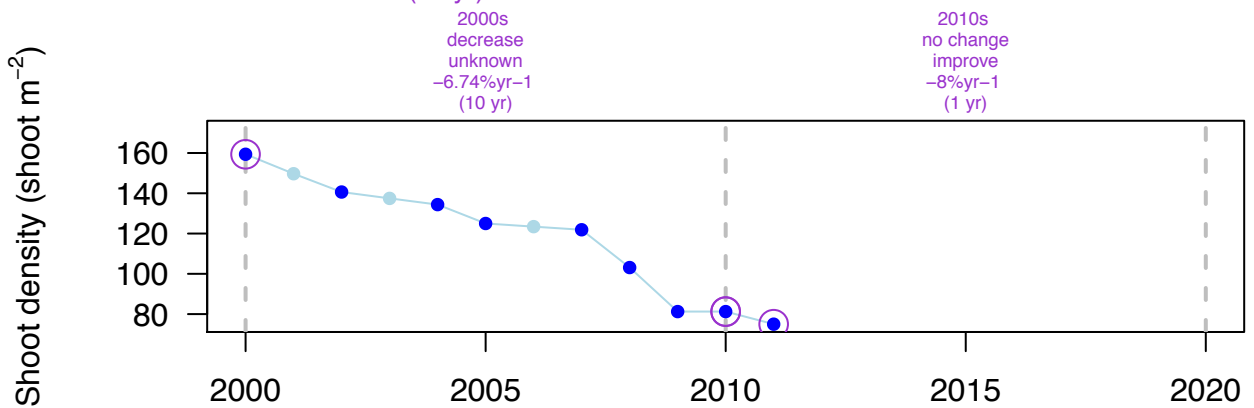

557\_density

Marbà and Duarte 2010, Duarte and Marbà (unpublished)

SITE: Cala Santa María (Spain – Mediterranean) – Po (-17 m)

OVERALL: Net = -181.33 shoot m<sup>-2</sup>; Rate = -4.78 % yr<sup>-1</sup>; Perc Final = 62 % > decrease

DECADAL: YES (10 yr)

Shoot density (shoot m<sup>-2</sup>)

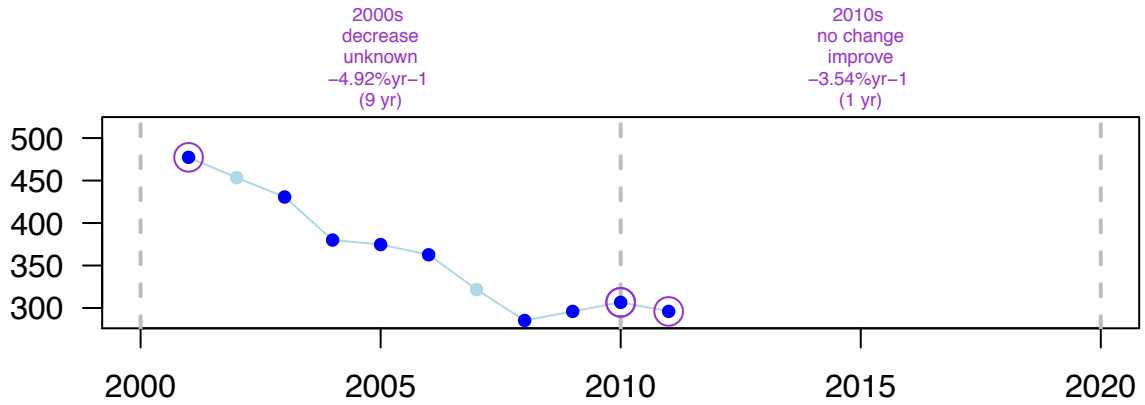

558\_density

Marbà and Duarte 2010, Duarte and Marbà (unpublished)

SITE: Cala Santa María (Spain – Mediterranean) – Po (-7 m)

OVERALL: Net = -337.04 shoot m<sup>-2</sup>; Rate = -3.74 % yr<sup>-1</sup>; Perc Final = 66 % > decrease

DECADAL: YES (11 yr)

Shoot density (shoot m<sup>-2</sup>)

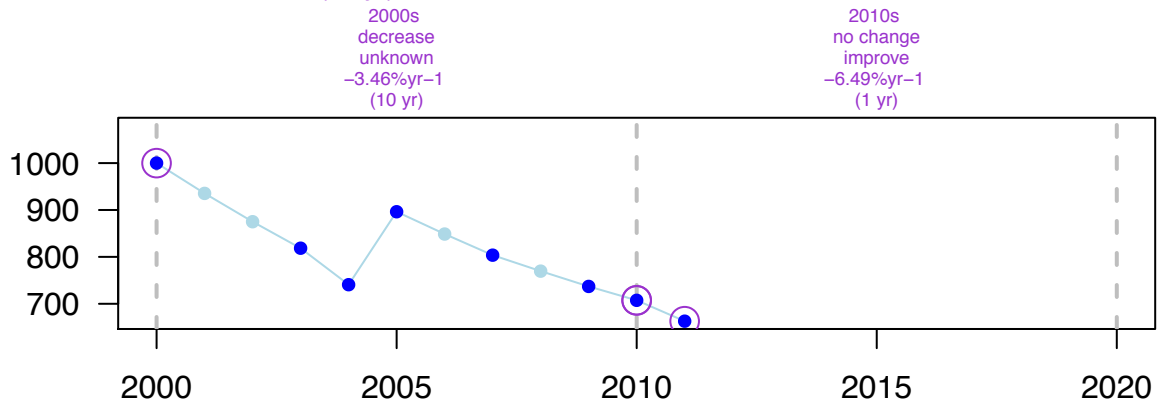



559\_density

Marbà and Duarte 2010, Duarte and Marbà (unpublished)

SITE: El Castell (Spain – Mediterranean) – Po (–20 m)

OVERALL: Net = –93.75 shoot m<sup>-2</sup>; Rate = –4.51 % yr<sup>-1</sup>; Perc Final = 61 % > decrease

DECADAL: YES (11 yr)

Shoot density (shoot m<sup>-2</sup>)

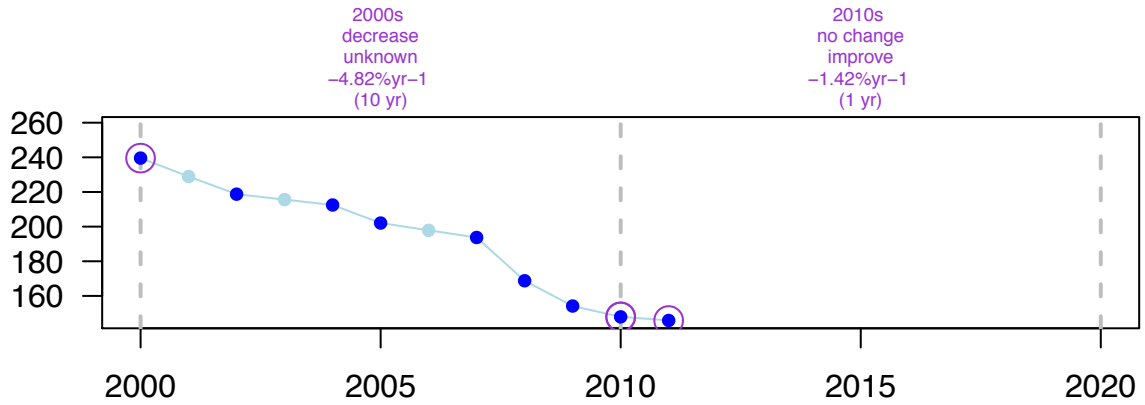

560\_lowerlimit

Aliani et al. 1998, Dando et al. 1995

SITE: Paleochori Bay (Greece – Mediterranean) – Po (? m)

OVERALL: Net = 0 m; Rate = 0 % yr<sup>-1</sup>; Perc Final = 100 % > no change

DECADAL: NO (4 yr)

Lower depth limit (m)

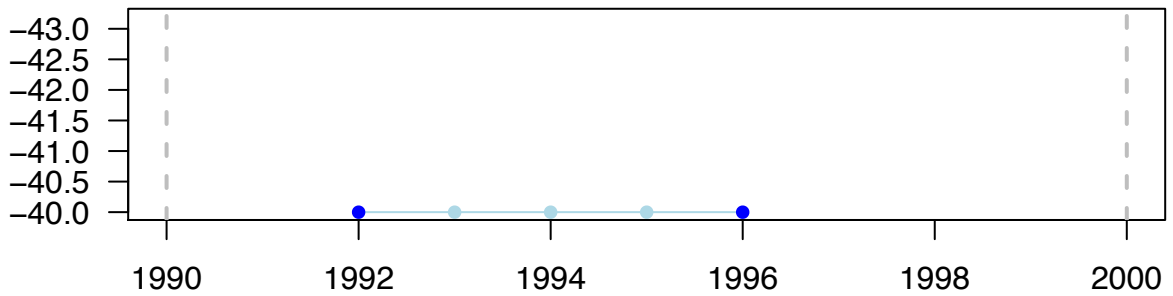

560\_upperlimit

Aliani et al. 1998, Dando et al. 1995

SITE: Paleochori Bay (Greece – Mediterranean) – Po (? m)

OVERALL: Net = 0 m; Rate = 0 % yr<sup>-1</sup>; Perc Final = 100 % > no change

DECADAL: NO (4 yr)

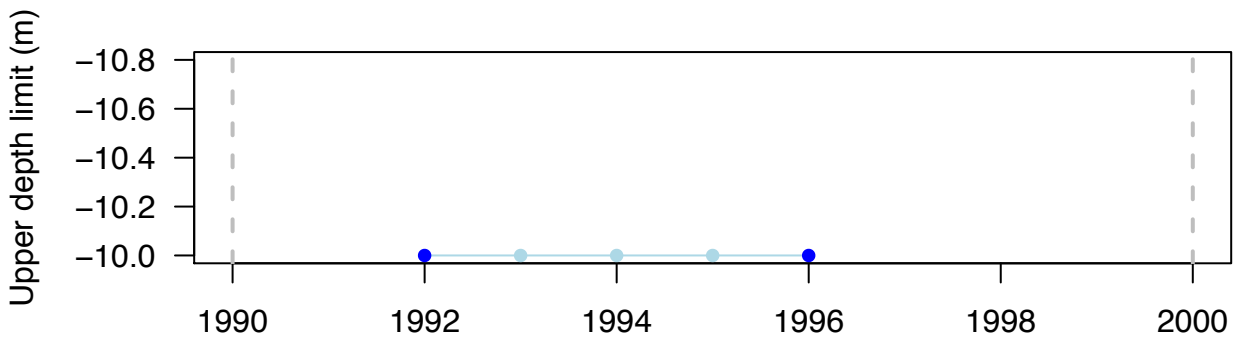

561\_area

Auby et al. 2010

SITE: Baie de Morlaix (France – Atlantic) – Zm (? m)

OVERALL: Net = 180 ha; Rate = 10.47 % yr<sup>-1</sup>; Perc Final = 433 % > increase

DECADAL: YES (14 yr)

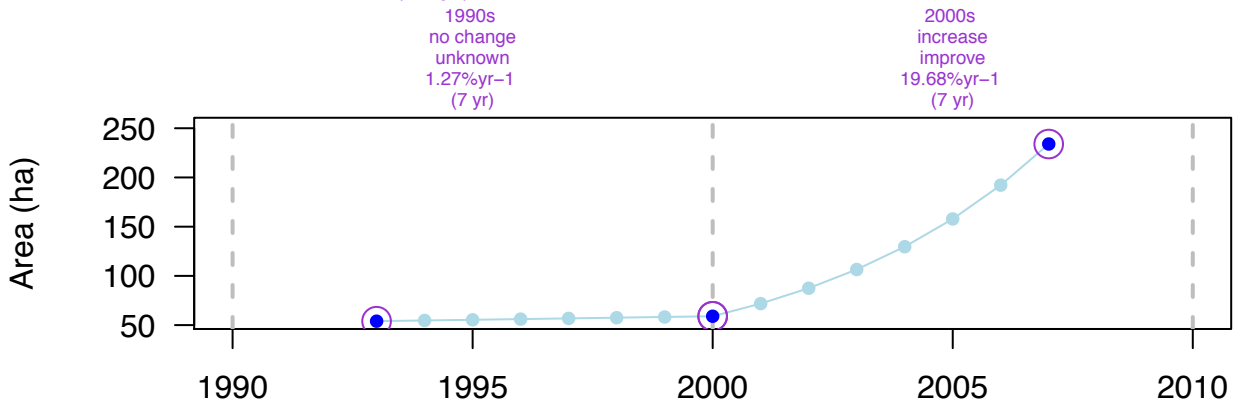

563\_abiomass

Auby et al. 2010

SITE: Golfe du Morbihan (France – Atlantic) – Zn (0 m)

OVERALL: Net = -56.5 g dw m<sup>-2</sup>; Rate = -3.33 % yr<sup>-1</sup>; Perc Final = 44 % > decrease

DECADAL: YES (25 yr)

AG biomass (g dw m<sup>-2</sup>)

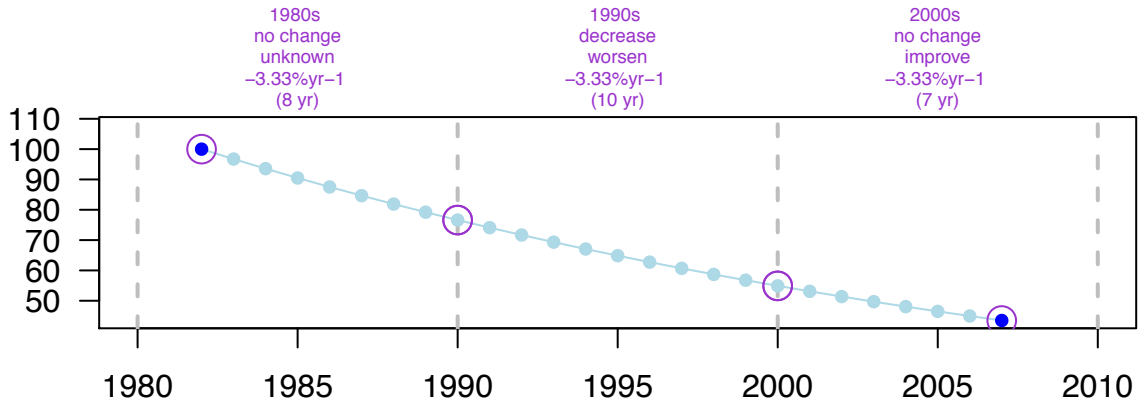

563\_density

Auby et al. 2010

SITE: Golfe du Morbihan (France – Atlantic) – Zn (0 m)

OVERALL: Net = 8543 shoot m<sup>-2</sup>; Rate = 5.67 % yr<sup>-1</sup>; Perc Final = 413 % > increase

DECADAL: YES (25 yr)

Shoot density (shoot m<sup>-2</sup>)

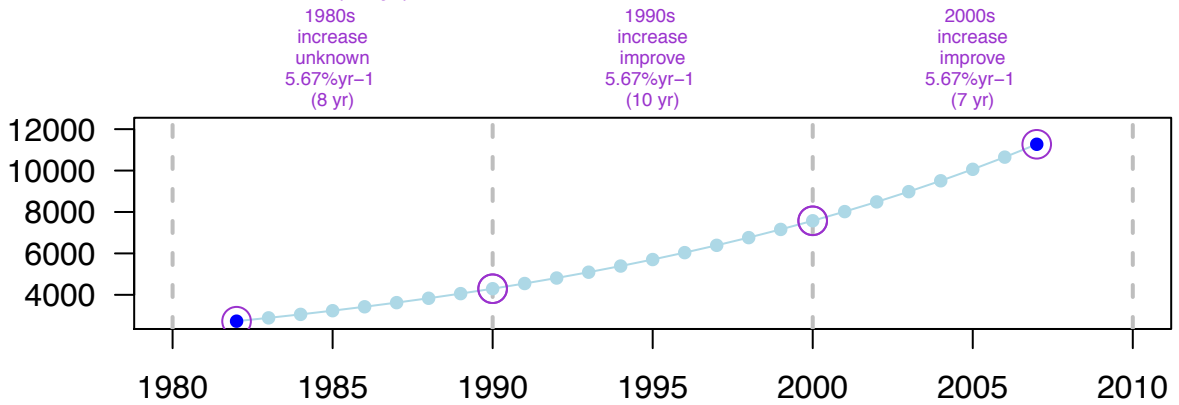

564\_abiomass

Auby et al. 2010

SITE: Golfe du Morbihan (France – Atlantic) – Zm (0 m)

OVERALL: Net = -96.9 g dw m<sup>-2</sup>; Rate = -5.15 % yr<sup>-1</sup>; Perc Final = 22 % > decrease

DECADAL: YES (29 yr)

AG biomass (g dw m<sup>-2</sup>)

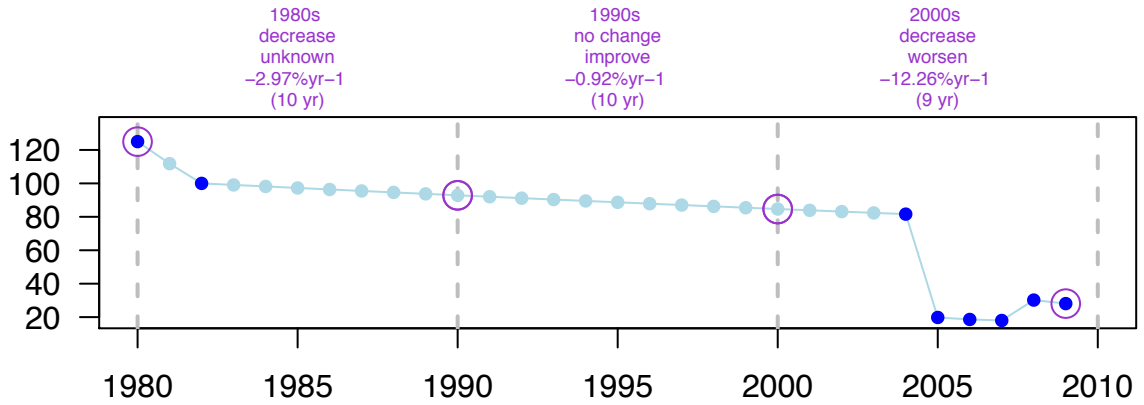

564\_density

Auby et al. 2010

SITE: Golfe du Morbihan (France – Atlantic) – Zm (0 m)

OVERALL: Net = -1982 shoot m<sup>-2</sup>; Rate = -10.71 % yr<sup>-1</sup>; Perc Final = 4 % > decrease

DECADAL: YES (29 yr)

Shoot density (shoot m<sup>-2</sup>)

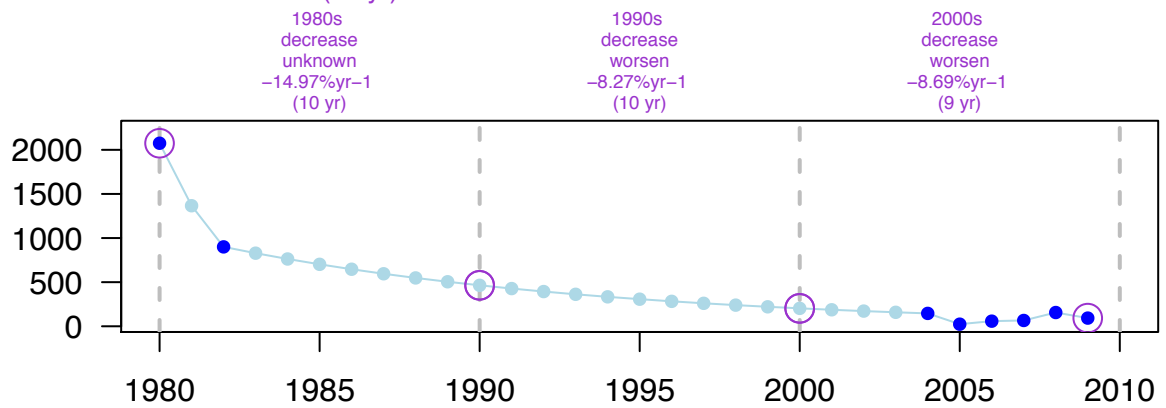

567\_area

Arroyo et al. 2015

SITE: Bahía de Algeciras (Spain – Mediterranean) – Cn (? m)

OVERALL: Net = -400 ha; Rate = NA % yr<sup>-1</sup>; Perc Final = NA % > decrease

DECADAL: YES (10 yr)

1990s  
decrease  
unknown  
-Inf%yr<sup>-1</sup>  
(10 yr)

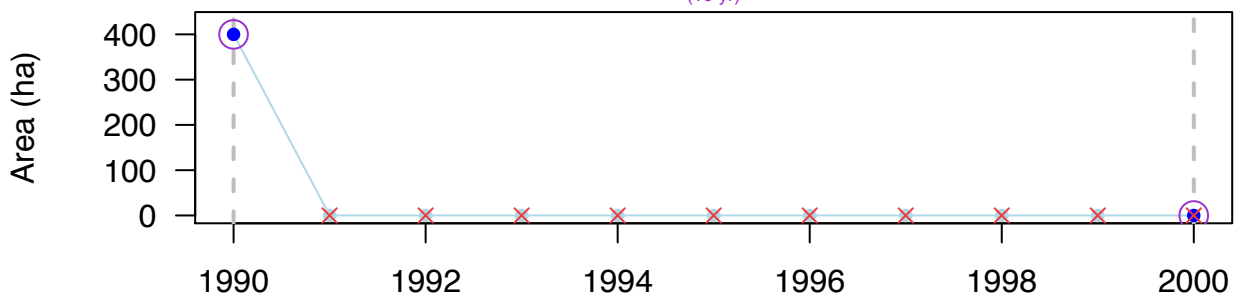

568\_cover

Arroyo et al. 2015

SITE: Cala Chinchas (Spain – Mediterranean) – Po (? m)

OVERALL: Net = -30 %; Rate = -16.18 % yr<sup>-1</sup>; Perc Final = 62 % > decrease

DECADAL: NO (3 yr)

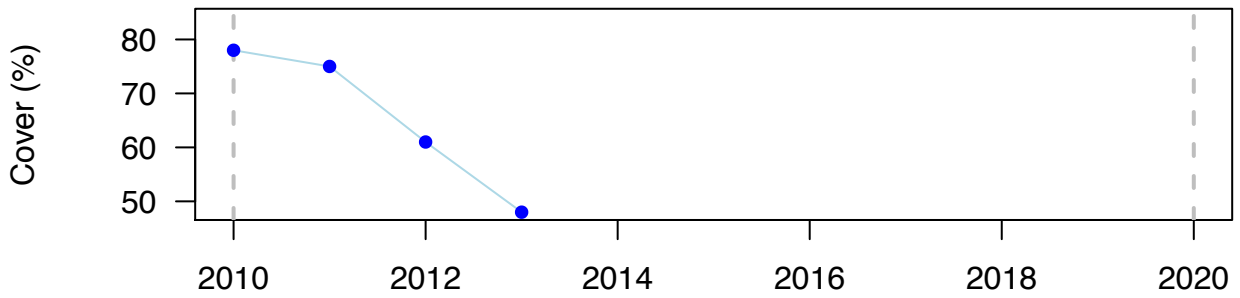

568\_density

Arroyo et al. 2015

SITE: Cala Chinchas (Spain – Mediterranean) – Po (? m)

OVERALL: Net = 90 shoot m<sup>-2</sup>; Rate = 4.59 % yr<sup>-1</sup>; Perc Final = 115 % > no change

DECADAL: NO (3 yr)

Shoot density (shoot m<sup>-2</sup>)

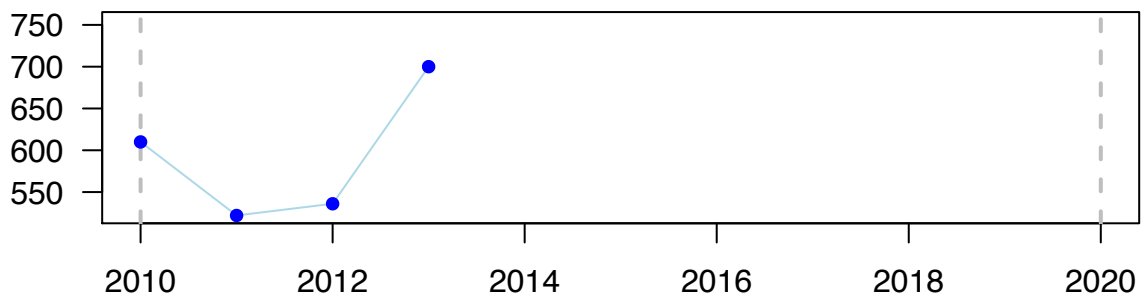

569\_density

Arroyo et al. 2015

SITE: Calaburras (Peñón del Fraile) (Spain – Mediterranean) – Po (? m)

OVERALL: Net = -30 shoot m<sup>-2</sup>; Rate = -0.54 % yr<sup>-1</sup>; Perc Final = 96 % > no change

DECADAL: NO (7 yr)

Shoot density (shoot m<sup>-2</sup>)

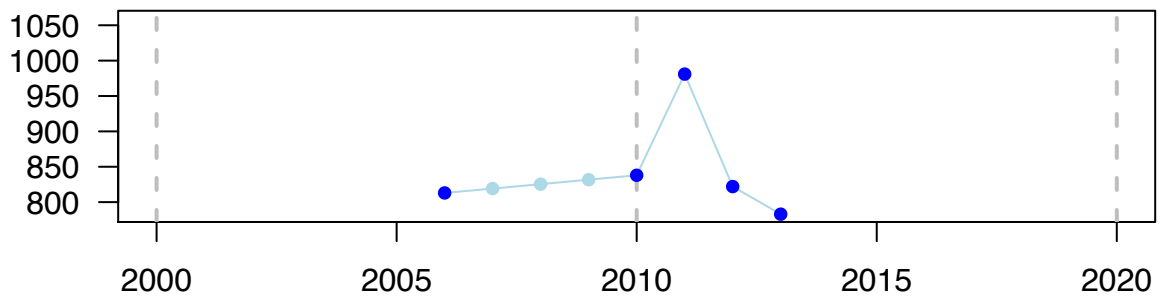

570\_cover

Arroyo et al. 2015

SITE: Cambriles (Spain – Mediterranean) – Po (? m)

OVERALL: Net = -33 %; Rate = -12.29 % yr<sup>-1</sup>; Perc Final = 61 % > decrease

DECADAL: NO (4 yr)

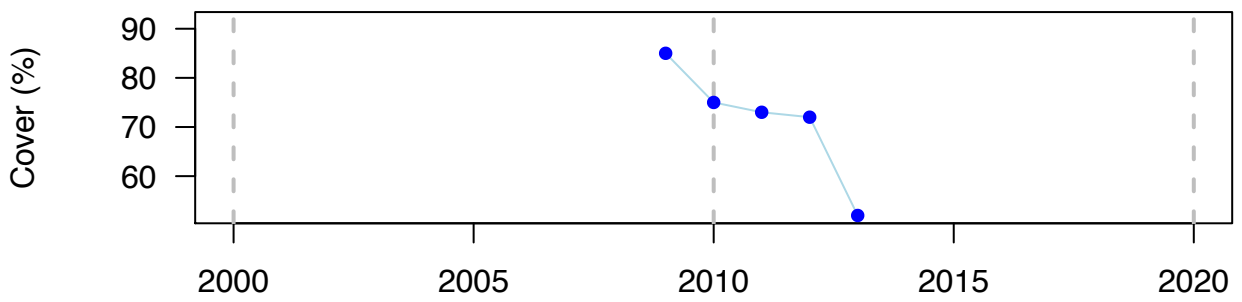

570\_density

Arroyo et al. 2015

SITE: Cambriles (Spain – Mediterranean) – Po (? m)

OVERALL: Net = 76 shoot m<sup>-2</sup>; Rate = 5.13 % yr<sup>-1</sup>; Perc Final = 123 % > no change

DECADAL: NO (4 yr)

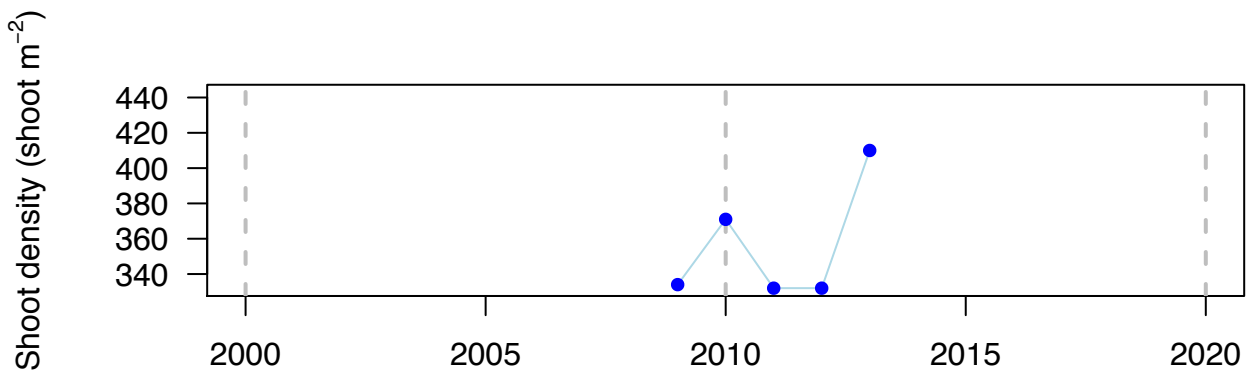

571\_cover

Arroyo et al. 2015

SITE: El Lance (Spain – Mediterranean) – Po (? m)

OVERALL: Net = -10 %; Rate = -5.34 % yr<sup>-1</sup>; Perc Final = 81 % > no change

DECADAL: NO (4 yr)

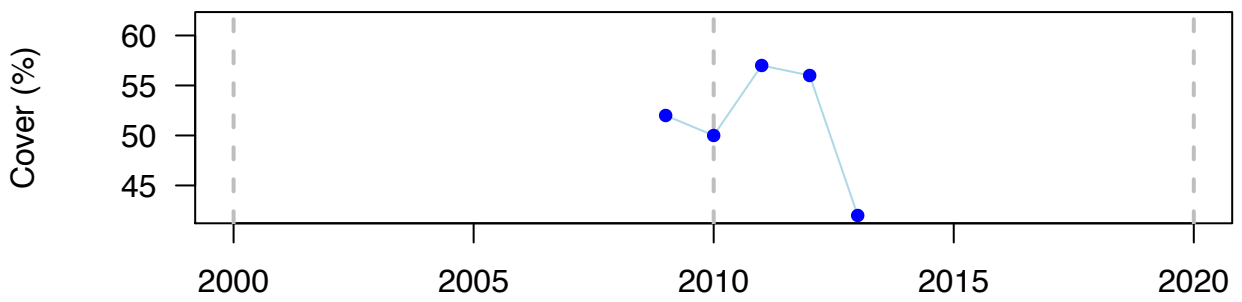

571\_density

Arroyo et al. 2015

SITE: El Lance (Spain – Mediterranean) – Po (? m)

OVERALL: Net = 198 shoot m<sup>-2</sup>; Rate = 12.25 % yr<sup>-1</sup>; Perc Final = 163 % > increase

DECADAL: NO (4 yr)

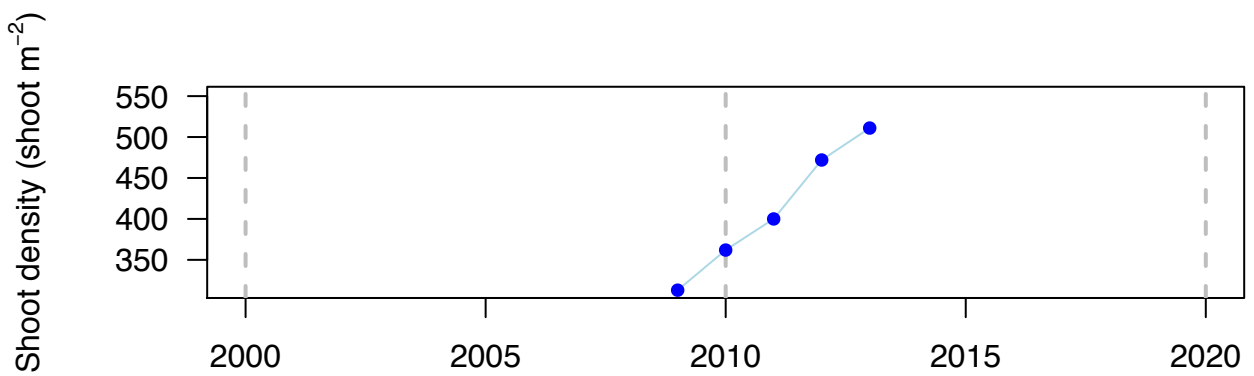



572\_cover

Arroyo et al. 2015

SITE: Melicena (Spain – Mediterranean) – Po (-7 m)

OVERALL: Net = -6 %; Rate = -2.74 % yr<sup>-1</sup>; Perc Final = 92 % > no change

DECADAL: NO (3 yr)

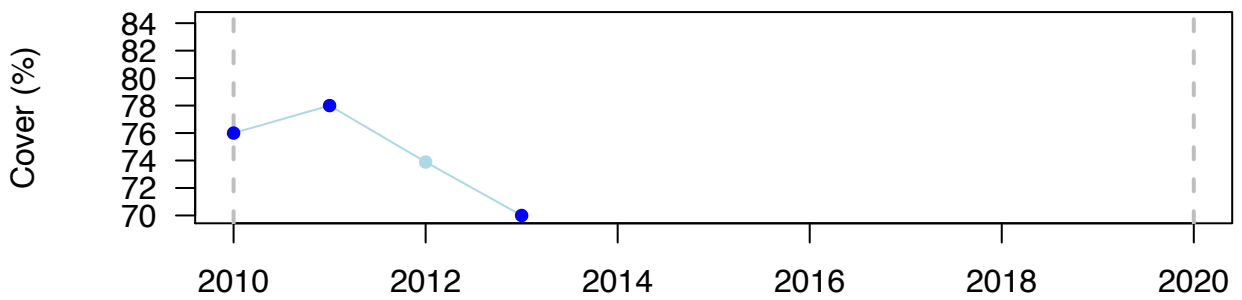

572\_density

Arroyo et al. 2015

SITE: Melicena (Spain – Mediterranean) – Po (-7 m)

OVERALL: Net = 114 shoot m<sup>-2</sup>; Rate = 6.38 % yr<sup>-1</sup>; Perc Final = 121 % > no change

DECADAL: NO (3 yr)

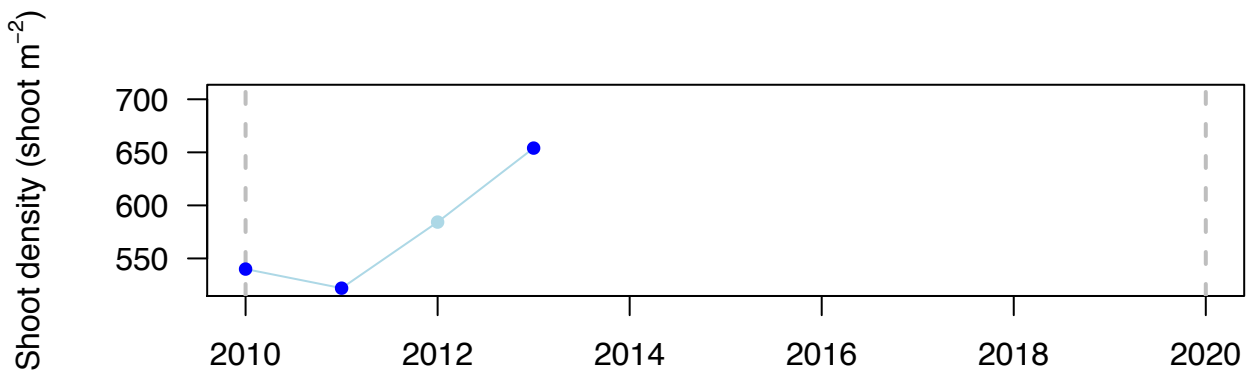

573\_density

Arroyo et al. 2015

SITE: Nerja (Spain – Mediterranean) – Po (? m)

OVERALL: Net = 436 shoot m<sup>-2</sup>; Rate = 8.47 % yr<sup>-1</sup>; Perc Final = 181 % > increase

DECADAL: NO (7 yr)

Shoot density (shoot m<sup>-2</sup>)

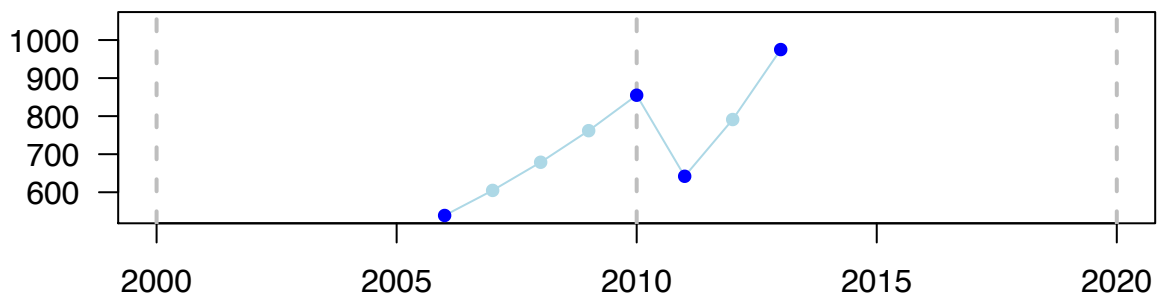

574\_density

Arroyo et al. 2015

SITE: Molino de Papel (Spain – Mediterranean) – Po (? m)

OVERALL: Net = 113 shoot m<sup>-2</sup>; Rate = 4.18 % yr<sup>-1</sup>; Perc Final = 134 % > increase

DECADAL: NO (7 yr)

Shoot density (shoot m<sup>-2</sup>)

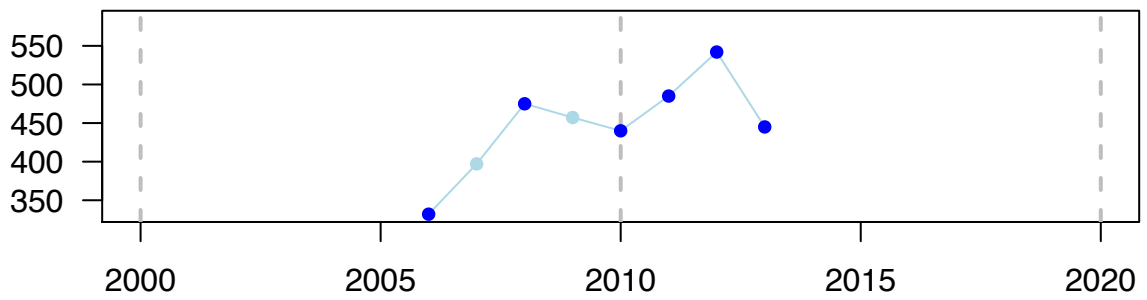

578\_area

Rueda et al. 2009

SITE: Playa del Cañuelo (Spain – Mediterranean) – Zm (? m)

OVERALL: Net = -38.8 ha; Rate = NA % yr<sup>-1</sup>; Perc Final = NA % > decrease

DECADAL: NO (6 yr)

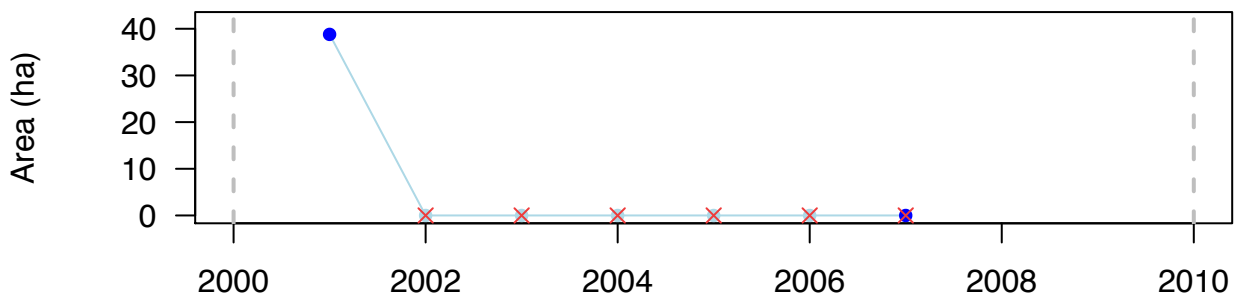

578\_biomass

Rueda et al. 2009

SITE: Playa del Cañuelo (Spain – Mediterranean) – Zm (? m)

OVERALL: Net = -187.97 g dw m<sup>-2</sup>; Rate = NA % yr<sup>-1</sup>; Perc Final = NA % > decrease

DECADAL: NO (3 yr)

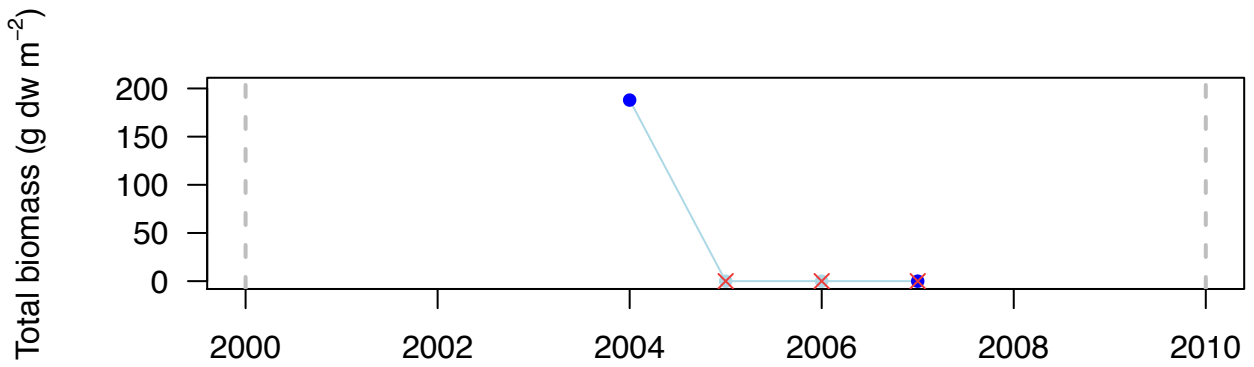

578\_density

Rueda et al. 2009

SITE: Playa del Cañuelo (Spain – Mediterranean) – Zm (? m)

OVERALL: Net = -404 shoot m<sup>-2</sup>; Rate = NA % yr<sup>-1</sup>; Perc Final = NA % > decrease

DECADAL: NO (3 yr)

Shoot density (shoot m<sup>-2</sup>)

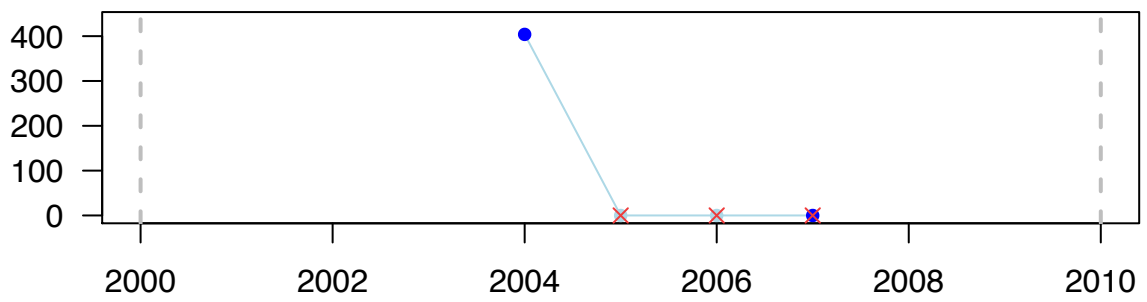

586\_upperlimit

Aragonés et al. 2015

SITE: Poniente Beach Benidorm (Spain – Mediterranean) – Po (? m)

OVERALL: Net = -3.5 m; Rate = -4.2 % yr<sup>-1</sup>; Perc Final = 53 % > decrease

DECADAL: YES (15 yr)

Upper depth limit (m)

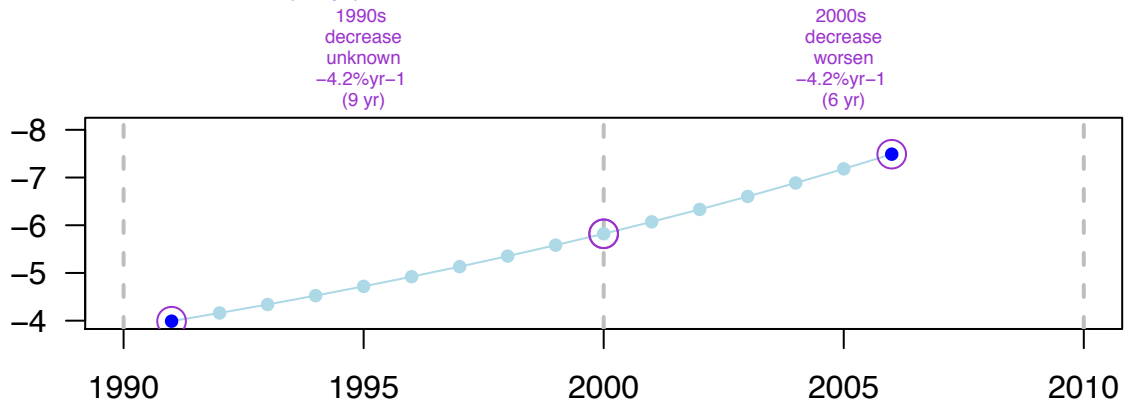

596\_area

Auby et al. 2010

SITE: Les Abers Large (France – Atlantic) – Zm (? m)

OVERALL: Net = 128 ha; Rate = 7.7 % yr<sup>-1</sup>; Perc Final = 294 % > increase

DECADAL: YES (14 yr)

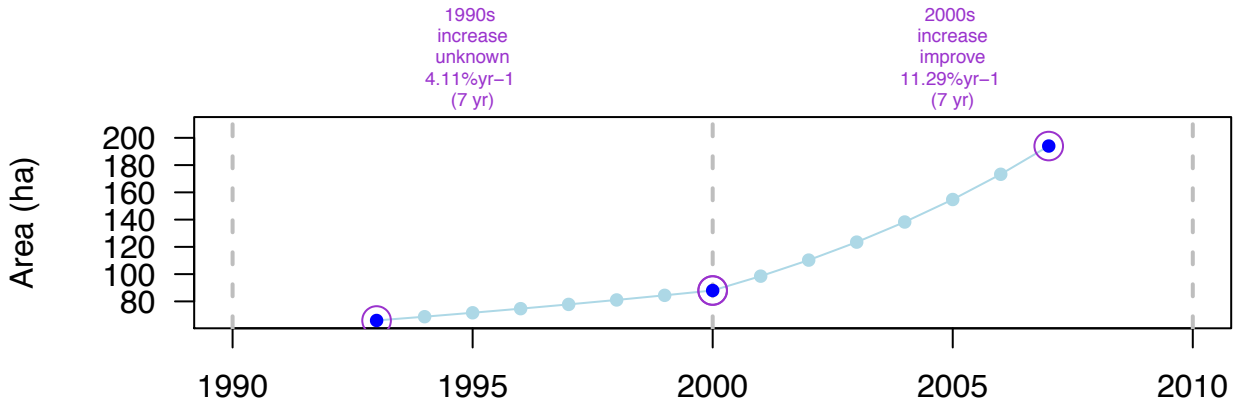

597\_abiomass

Auby et al. 2010

SITE: Roscanavel (France – Atlantic) – Zm (? m)

OVERALL: Net = -29.1 g dw m<sup>-2</sup>; Rate = -4.45 % yr<sup>-1</sup>; Perc Final = 80 % > no change

DECADAL: NO (5 yr)

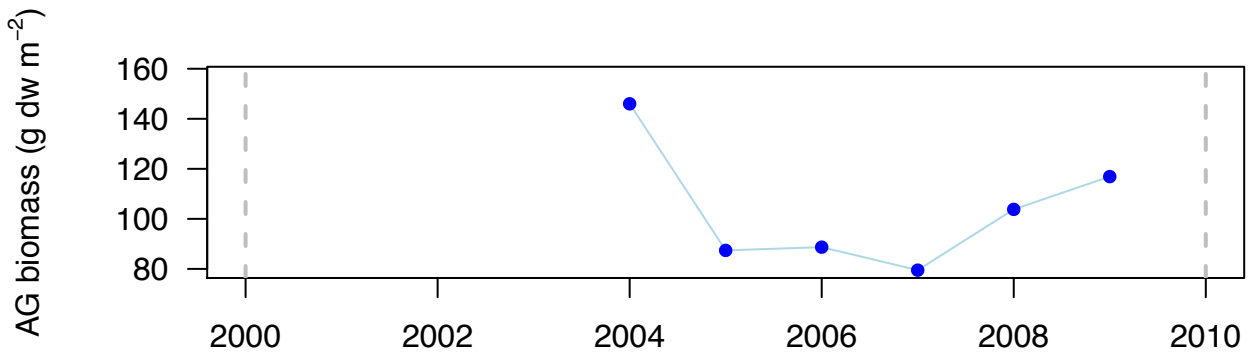

597\_density

Auby et al. 2010

SITE: Roscanavel (France – Atlantic) – Zm (? m)

OVERALL: Net = -176 shoot m<sup>-2</sup>; Rate = -12.91 % yr<sup>-1</sup>; Perc Final = 52 % > decrease

DECADAL: NO (5 yr)

Shoot density (shoot m<sup>-2</sup>)

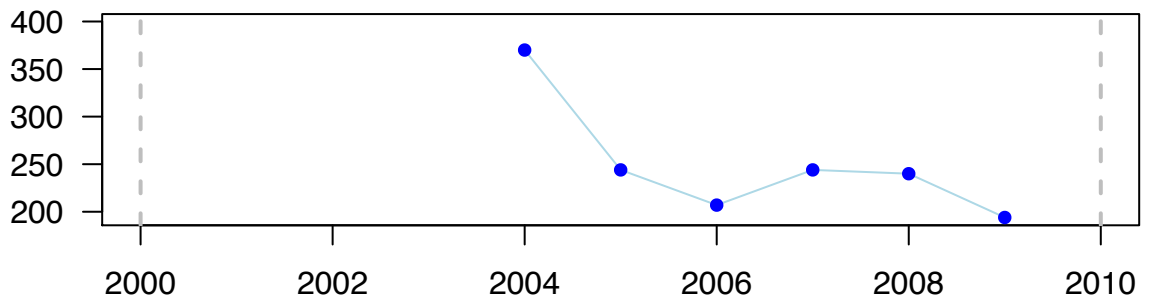

598\_abiomass

Auby et al. 2010

SITE: Plage de la Charge Neuve (France – Atlantic) – Zn (? m)

OVERALL: Net = 6.4 g dw m<sup>-2</sup>; Rate = 4.55 % yr<sup>-1</sup>; Perc Final = 120 % > no change

DECADAL: NO (4 yr)

AG biomass (g dw m<sup>-2</sup>)

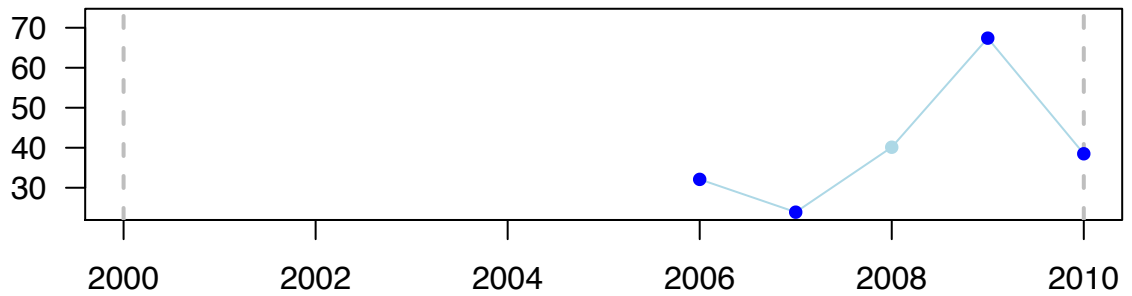

598\_density

Auby et al. 2010

SITE: Plage de la Charge Neuve (France – Atlantic) – Zn (? m)

OVERALL: Net = -4506 shoot m<sup>-2</sup>; Rate = -13.25 % yr<sup>-1</sup>; Perc Final = 59 % > decrease

DECADAL: NO (4 yr)

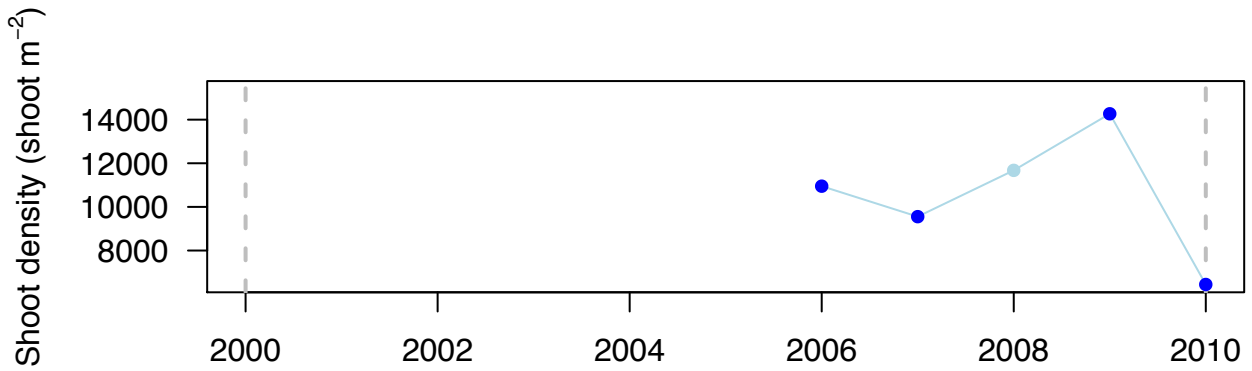

620\_area

Calleja et al. 2017

SITE: Santander Bay (Spain – Atlantic) – Zn (0.9 m)

OVERALL: Net = 12.15 ha; Rate = 5 % yr<sup>-1</sup>; Perc Final = 472 % > increase

DECADAL: YES (31 yr)

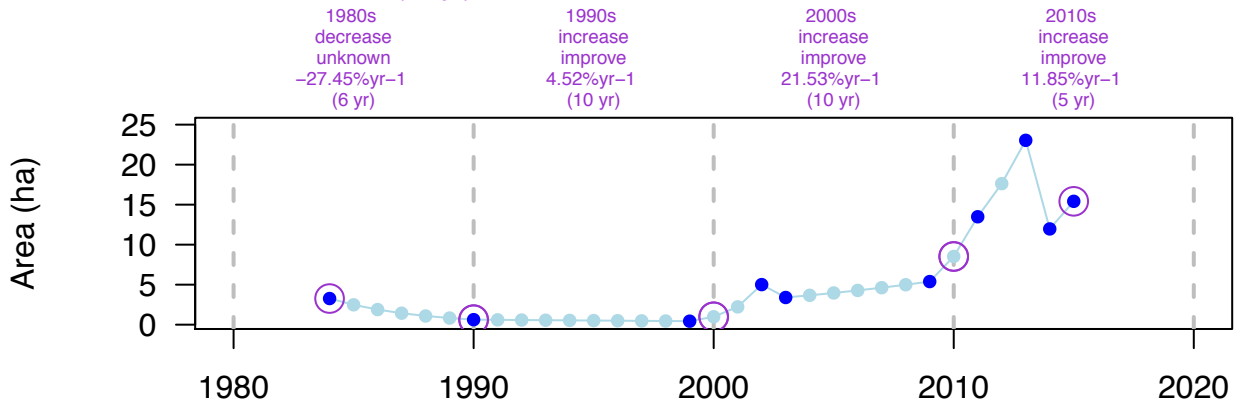

621\_area

Calleja et al. 2017

SITE: Santander Bay (Spain – Atlantic) – Zn (0.3 m)

OVERALL: Net = 7.48 ha; Rate = 2.15 % yr<sup>-1</sup>; Perc Final = 194 % > increase

DECADAL: YES (31 yr)

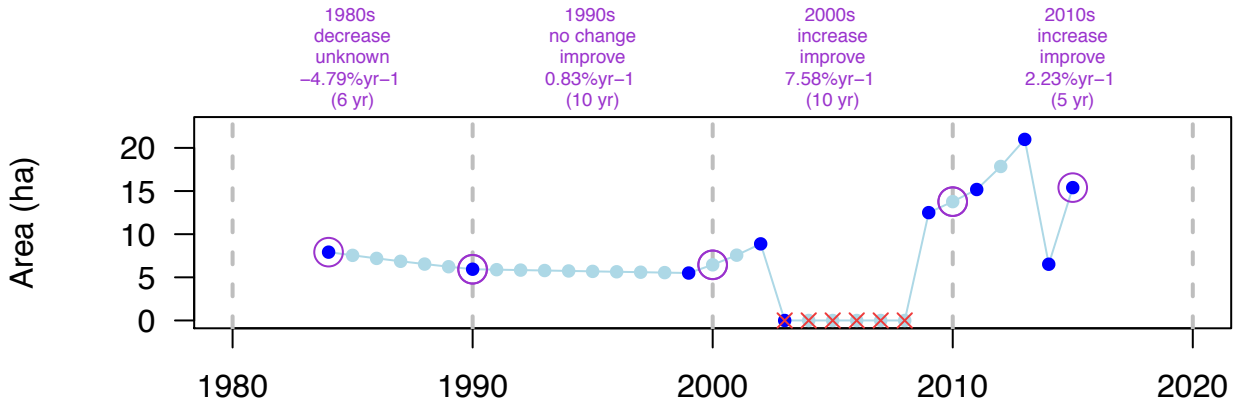

622\_area

Calleja et al. 2017

SITE: Santander Bay (Spain – Atlantic) – Zn (0.4 m)

OVERALL: Net = 18.23 ha; Rate = 2.57 % yr<sup>-1</sup>; Perc Final = 222 % > increase

DECADAL: YES (31 yr)

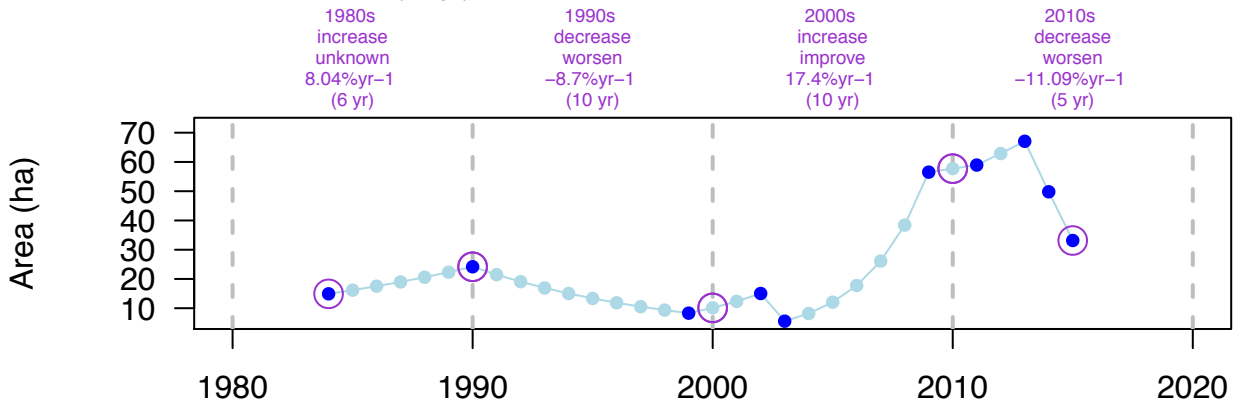



623\_area

Calleja et al. 2017

SITE: Santander Bay (Spain – Atlantic) – Zn (-0.7 m)

OVERALL: Net = 10.89 ha; Rate = 3.48 % yr<sup>-1</sup>; Perc Final = 239 % > increase

DECADAL: YES (25 yr)

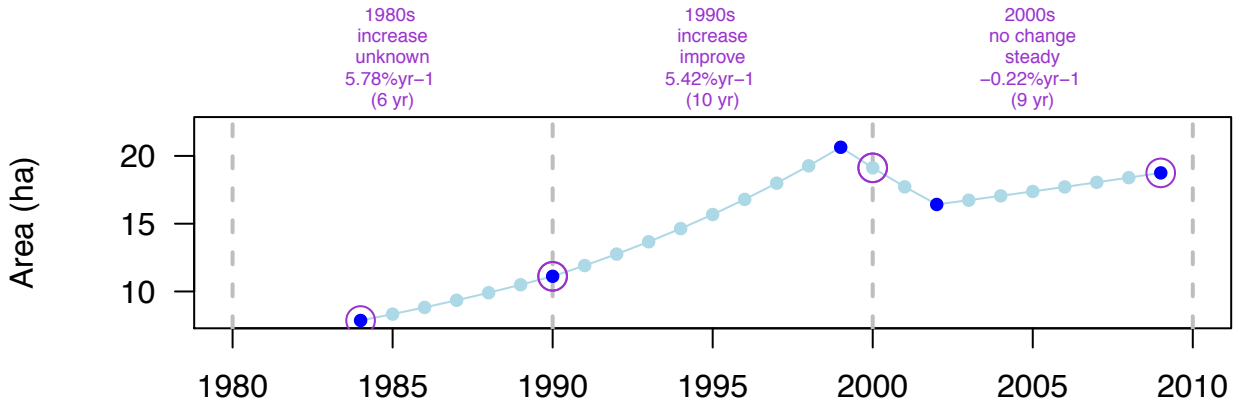

624\_density

Bernard et al. 2005

SITE: Berre Lagoon (La Mède oil terminal) (France – Mediterranean) – Zn (-2 m)

OVERALL: Net = 66.5 shoot m<sup>-2</sup>; Rate = NA % yr<sup>-1</sup>; Perc Final = NA % > increase

DECADAL: NO (2 yr)

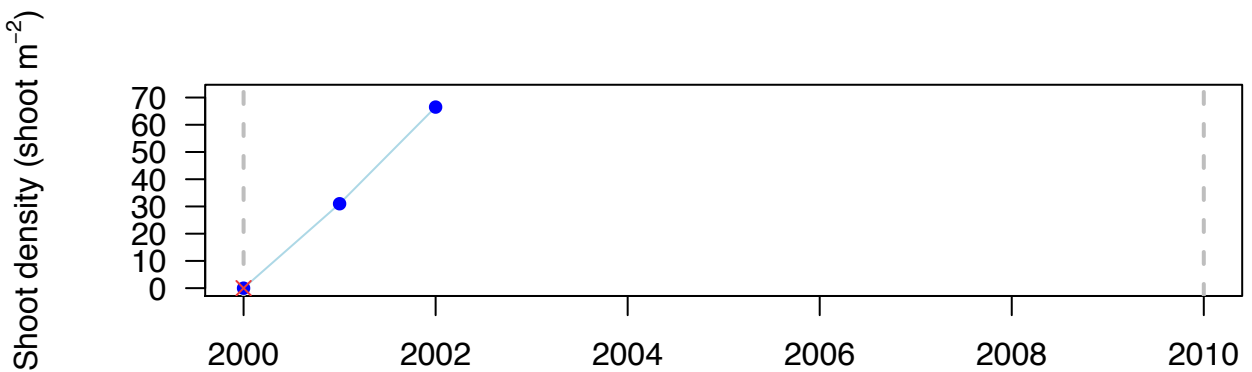

641\_area

de Paz et al. 2008

SITE: Linera inlet (Spain – Atlantic) – Zn (? m)

OVERALL: Net = -38 ha; Rate = -2.11 % yr<sup>-1</sup>; Perc Final = 73 % > decrease

DECADAL: YES (15 yr)

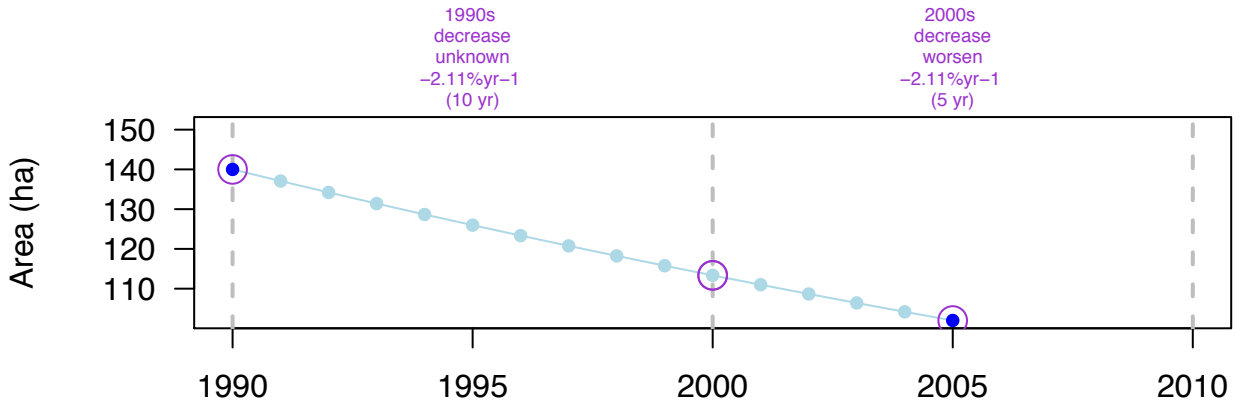

658\_biomass

Kruk-Dowgiallo 1991, Gic-Grusza et al. 2009, Kruk-Dowgiallo and Szaniawska 2008

SITE: Puck Bay (Poland – Baltic) – Zm (-3.1 m)

OVERALL: Net = -16.2 g dw m<sup>-2</sup>; Rate = -1.44 % yr<sup>-1</sup>; Perc Final = 56 % > decrease

DECADAL: YES (40 yr)

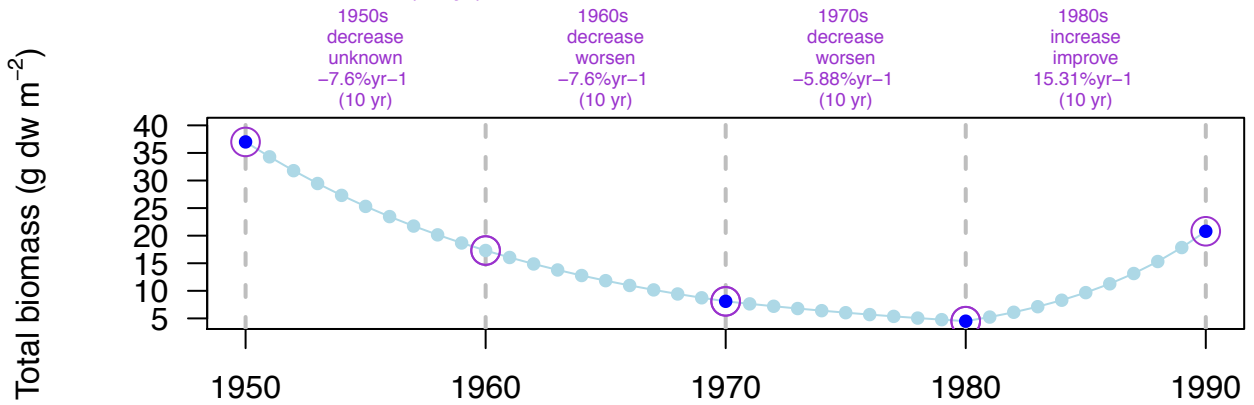

658\_area

Kruk-Dowgiallo 1991, Gic-Grusza et al. 2009, Kruk-Dowgiallo and Szaniawska 2008

SITE: Puck Bay (Poland – Baltic) – Zm (-3.1 m)

OVERALL: Net = -3296.08 ha; Rate = -4.66 % yr<sup>-1</sup>; Perc Final = 9 % > decrease

DECADAL: YES (52 yr)

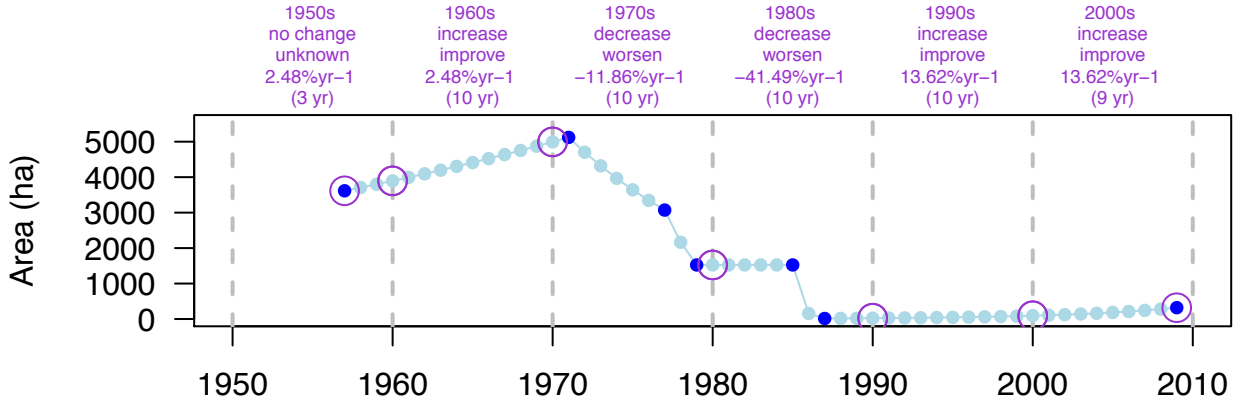

670\_biomass

Pérez-Ruzafa et al. 2012

SITE: Mar Menor (Spain – Mediterranean) – Cn (? m)

OVERALL: Net = -46.83 g dw m<sup>-2</sup>; Rate = -11.6 % yr<sup>-1</sup>; Perc Final = 5 % > decrease

DECADAL: YES (26 yr)

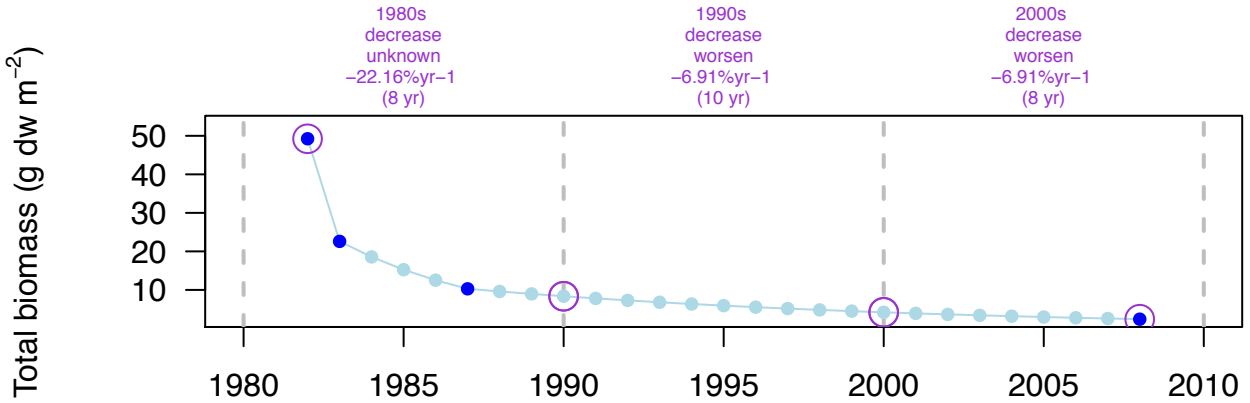

684\_lowerlimit

Meinesz et al. 2002

SITE: Elbu Bay (France – Mediterranean) – Po (–35.5 m)

OVERALL: Net = –3 m; Rate = –0.4 % yr<sup>-1</sup>; Perc Final = 92 % > no change

DECADAL: YES (22 yr)

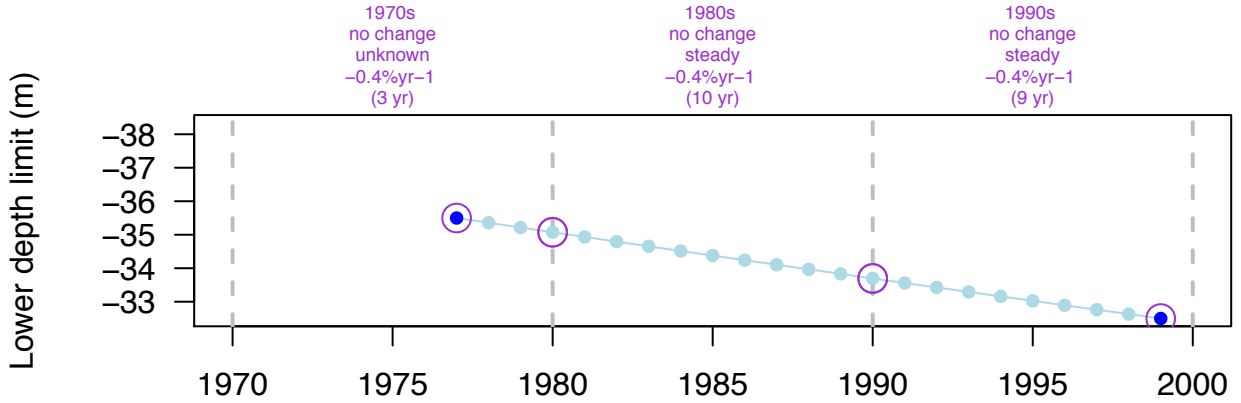

691\_area

Arroyo et al. 2015, Consejería de Medio Ambiente 2016

SITE: Palmones (Spain – Mediterranean) – Zn (? m)

OVERALL: Net = 1.43 ha; Rate = NA % yr<sup>-1</sup>; Perc Final = NA % > increase

DECADAL: YES (26 yr)

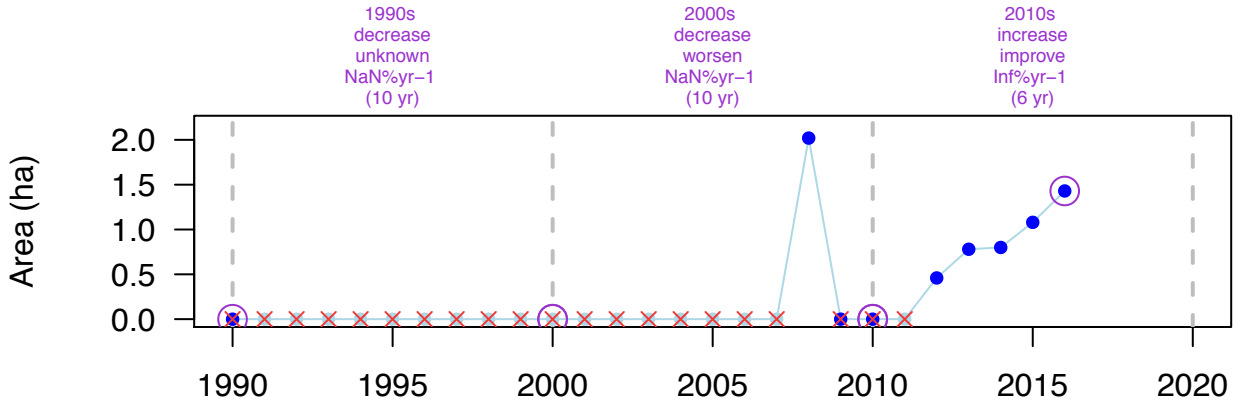

691\_cover

Arroyo et al. 2015, Consejería de Medio Ambiente 2016

SITE: Palmones (Spain – Mediterranean) – Zn (? m)

OVERALL: Net = 23.34 %; Rate = 8.9 % yr<sup>-1</sup>; Perc Final = 186 % > increase

DECADAL: NO (7 yr)

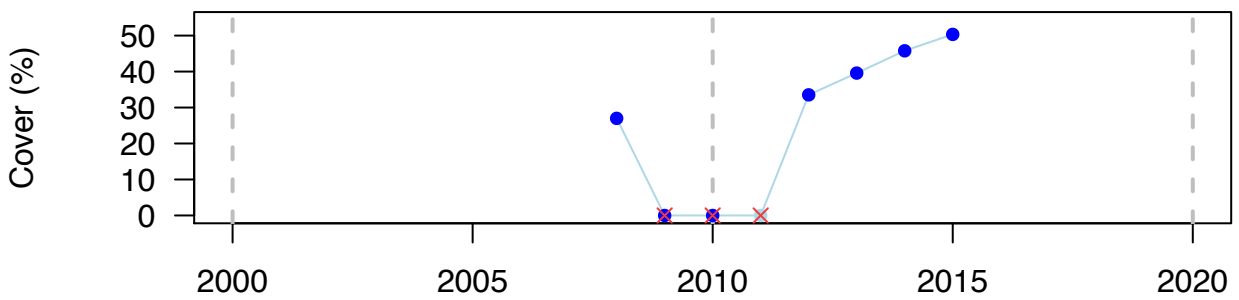

730\_area

Mancusi et al. 2011

SITE: Piombino (Italy – Mediterranean) – Po (? m)

OVERALL: Net = -68.6 ha; Rate = -0.43 % yr<sup>-1</sup>; Perc Final = 91 % > no change

DECADAL: YES (21 yr)

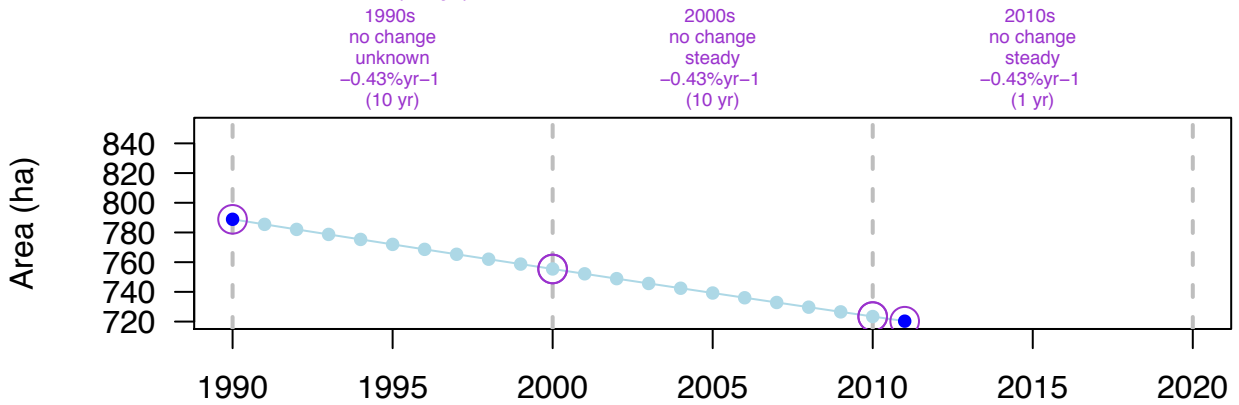

773\_abiomass

Auby et al. 2010

SITE: Saint Malo (Rance – Fresnaye) (France – Atlantic) – Zm (? m)

OVERALL: Net =  $-4.5 \text{ g dw m}^{-2}$ ; Rate =  $-2.93 \text{ \% yr}^{-1}$ ; Perc Final = 86 % > no change

DECADAL: NO (5 yr)

AG biomass ( $\text{g dw m}^{-2}$ )

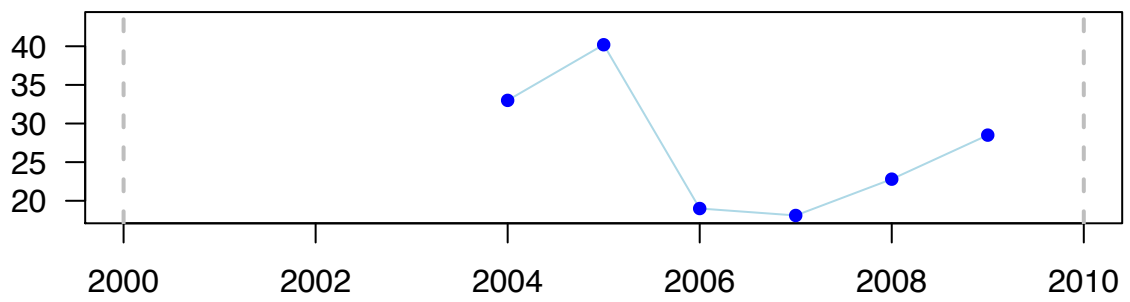

773\_density

Auby et al. 2010

SITE: Saint Malo (Rance – Fresnaye) (France – Atlantic) – Zm (? m)

OVERALL: Net =  $-341 \text{ shoot m}^{-2}$ ; Rate =  $-12.64 \text{ \% yr}^{-1}$ ; Perc Final = 53 % > decrease

DECADAL: NO (5 yr)

Shoot density ( $\text{shoot m}^{-2}$ )

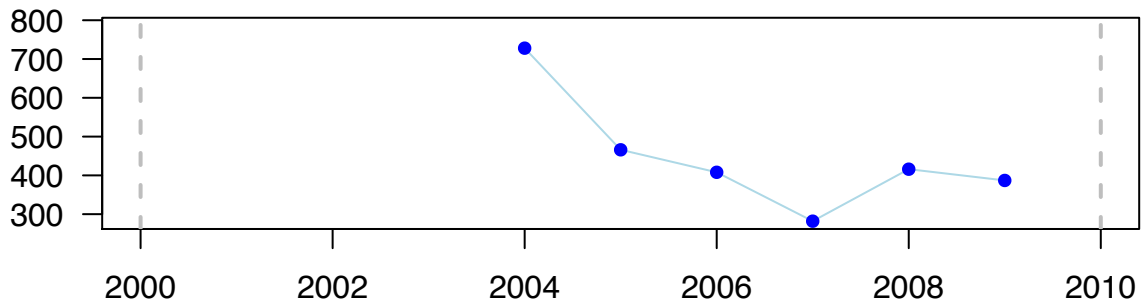

774\_area

Auby et al. 2010

SITE: Rance – Fresnaye (France – Atlantic) – Zm (? m)

OVERALL: Net = 210 ha; Rate = 9.61 % yr<sup>-1</sup>; Perc Final = 384 % > increase

DECADAL: YES (14 yr)

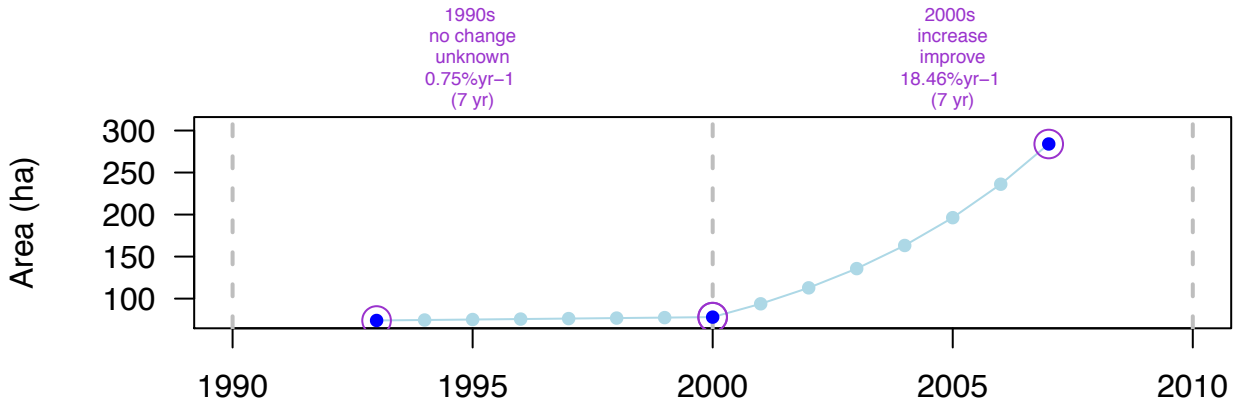

789\_cover

Consejería de Medio Ambiente 2016

SITE: Río Piedras (Spain – Atlantic) – Zn (? m)

OVERALL: Net = -34.1 %; Rate = -26.97 % yr<sup>-1</sup>; Perc Final = 58 % > decrease

DECADAL: NO (2 yr)

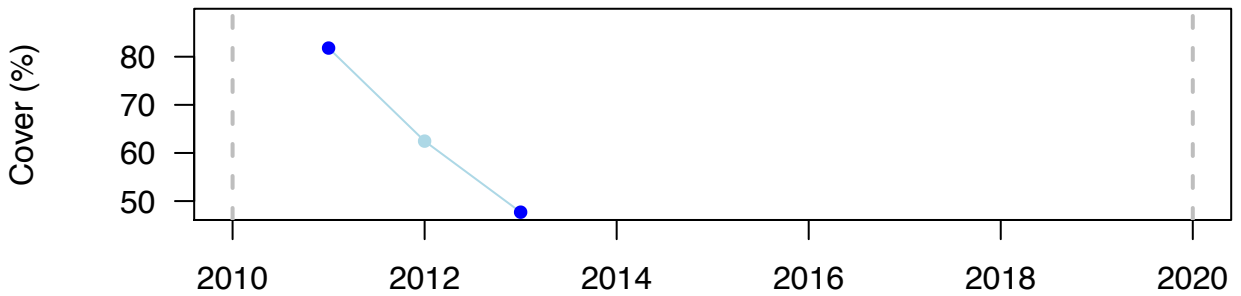

789\_density

Consejería de Medio Ambiente 2016

SITE: Río Piedras (Spain – Atlantic) – Zn (? m)

OVERALL: Net = -1883 shoot m<sup>-2</sup>; Rate = -20.57 % yr<sup>-1</sup>; Perc Final = 66 % > decrease

DECADAL: NO (2 yr)

Shoot density (shoot m<sup>-2</sup>)

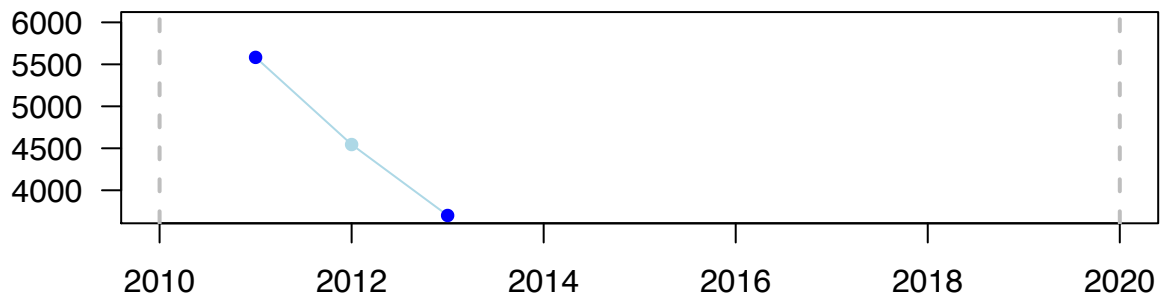

798\_area

Cole 2016

SITE: Fishcombe Cove (United Kingdom – Atlantic) – Zn (? m)

OVERALL: Net = -0.07 ha; Rate = -7.66 % yr<sup>-1</sup>; Perc Final = 68 % > decrease

DECADAL: NO (5 yr)

Area (ha)

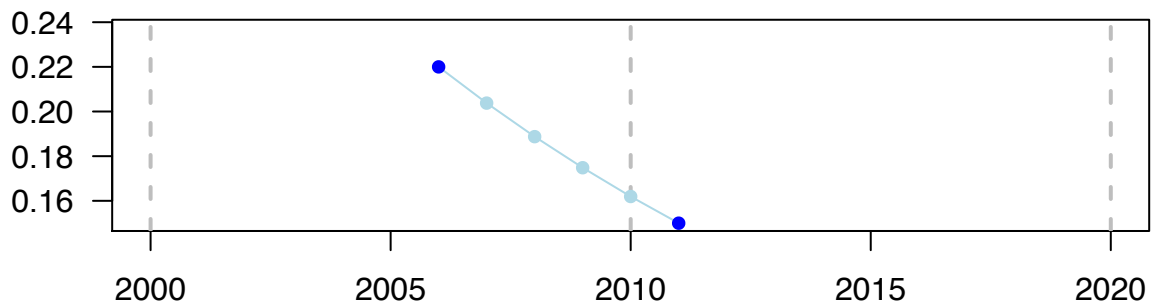



799\_area

Wirtz 1995, Kaufmann and Maranhão 2017

SITE: Machico Bay (Portugal – Atlantic) – Cn (? m)

OVERALL: Net = -8 ha; Rate = NA % yr<sup>-1</sup>; Perc Final = NA % > decrease

DECADAL: YES (17 yr)

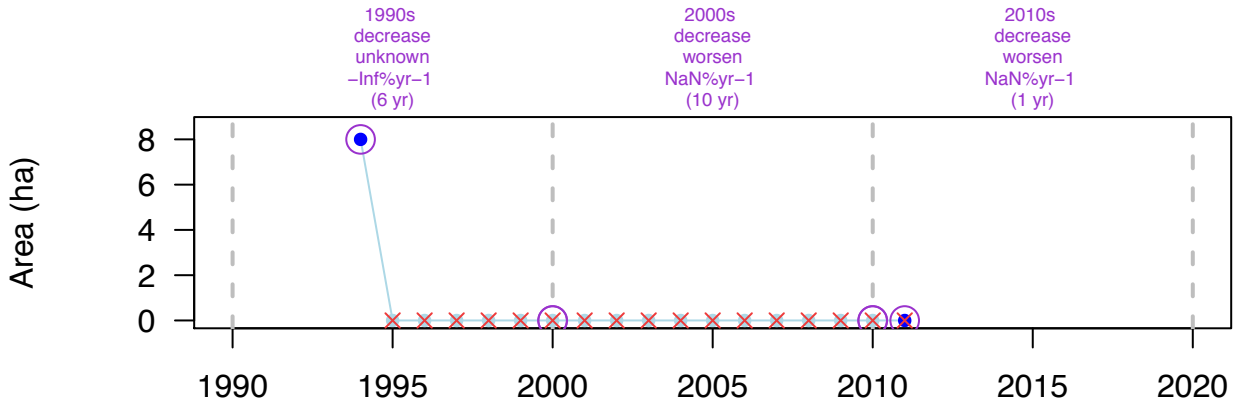

800\_cover

Cook (unpublished)

SITE: Portsmouth Harbour (coastal) (United Kingdom – Atlantic) – Zm (? m)

OVERALL: Net = -15.88 %; Rate = -20.03 % yr<sup>-1</sup>; Perc Final = 67 % > decrease

DECADAL: NO (2 yr)

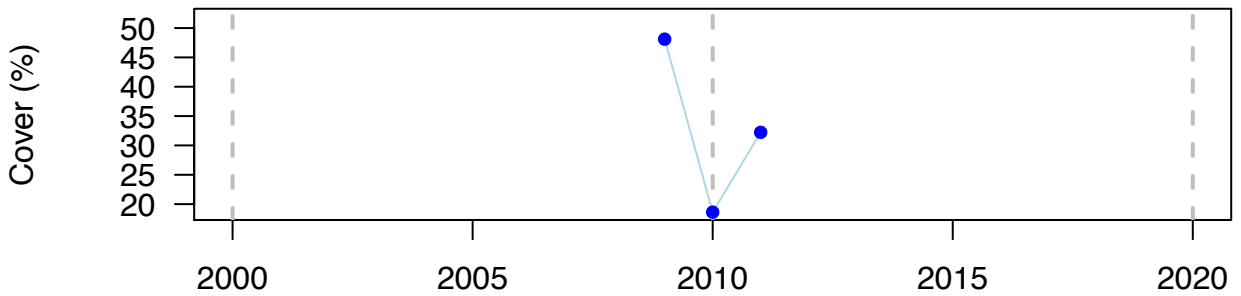

803\_area

Polderman and Den Hartog 1975, de Jong (unpublished)

SITE: Balgzand (The Netherlands – Atlantic) – Zn (–0.6 m)

OVERALL: Net = –47.4 ha; Rate = NA % yr–1; Perc Final = NA % > decrease

DECADAL: YES (17 yr)

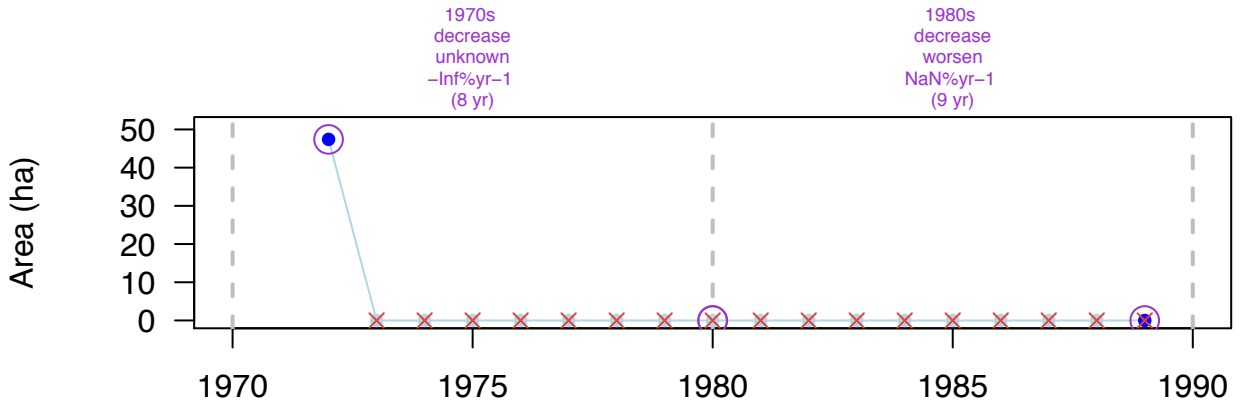

803\_lowerlimit

Polderman and Den Hartog 1975, de Jong (unpublished)

SITE: Balgzand (The Netherlands – Atlantic) – Zn (–0.6 m)

OVERALL: Net = NA m; Rate = NA % yr–1; Perc Final = NA % > decrease

DECADAL: YES (17 yr)

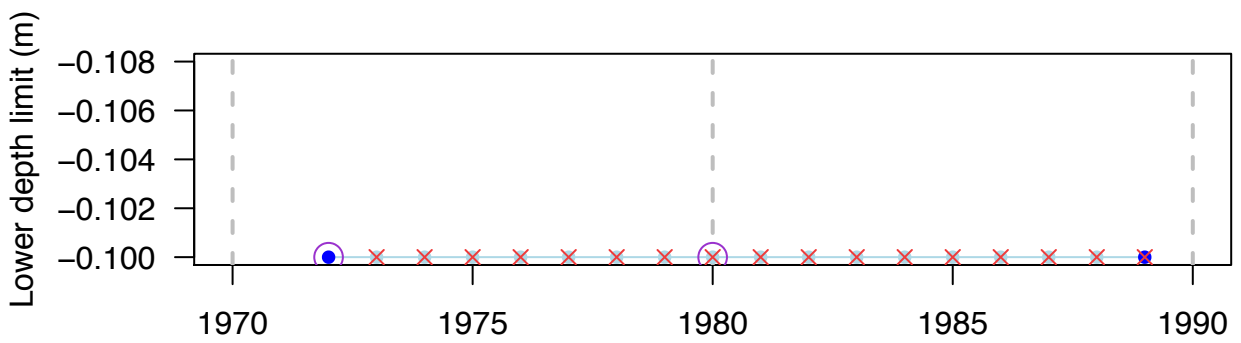

803\_upperlimit

Polderman and Den Hartog 1975, de Jong (unpublished)

SITE: Balgzand (The Netherlands – Atlantic) – Zn (–0.6 m)

OVERALL: Net = NA m; Rate = NA % yr<sup>-1</sup>; Perc Final = NA % > decrease

DECADAL: YES (17 yr)

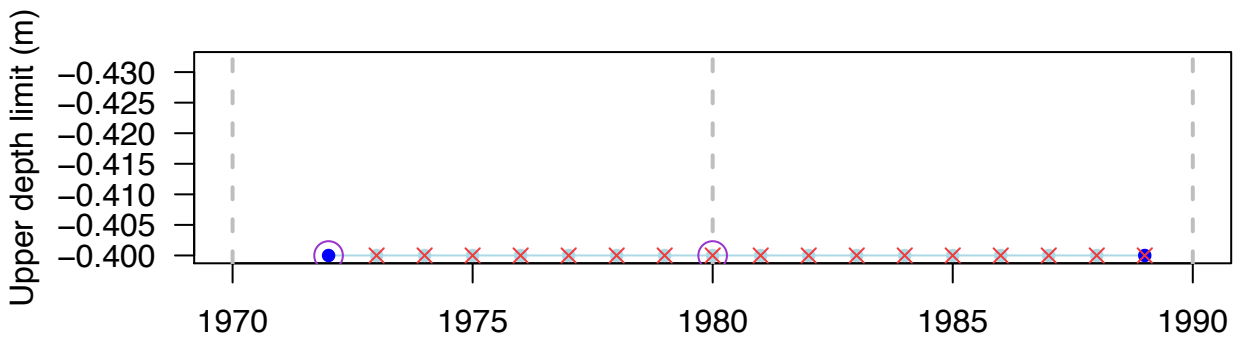

806\_area

Kastler and Michaelis 1999

SITE: Borkum (Germany – Atlantic) – Zn (? m)

OVERALL: Net = 22.9 ha; Rate = 1.11 % yr<sup>-1</sup>; Perc Final = 131 % > increase

DECADAL: YES (24 yr)

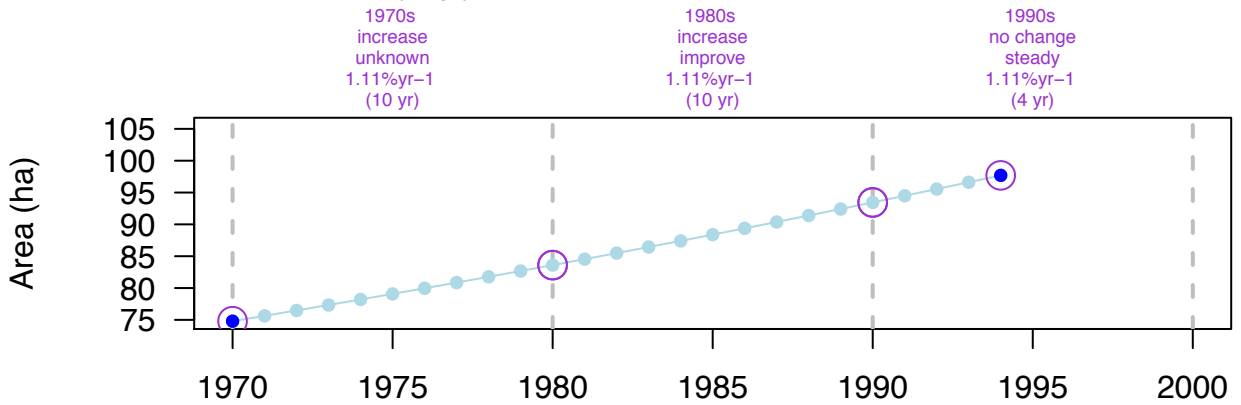

807\_area

Kastler and Michaelis 1999

SITE: Juist (Germany – Atlantic) – Zn (? m)

OVERALL: Net = -728.1 ha; Rate = -16.34 % yr<sup>-1</sup>; Perc Final = 2 % > decrease

DECADAL: YES (24 yr)

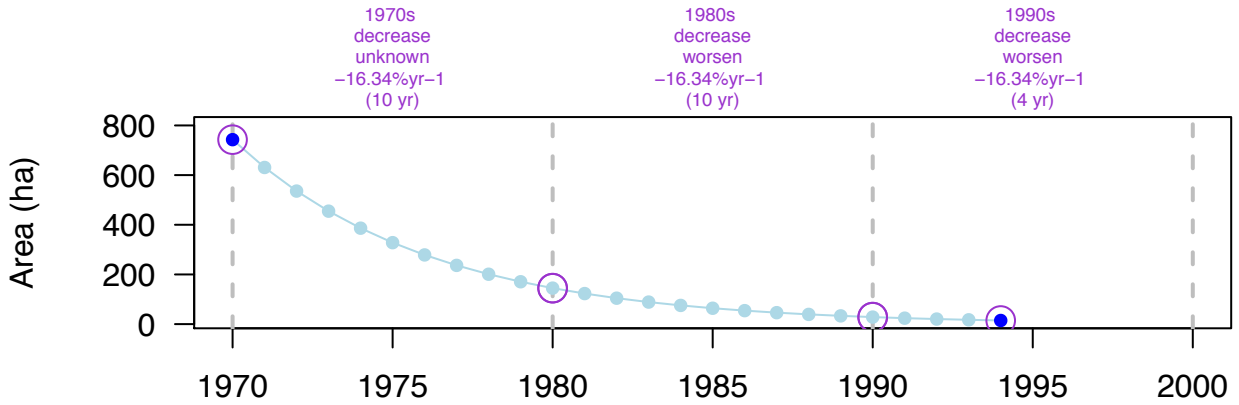

808\_area

Kastler and Michaelis 1999

SITE: Norderney (Germany – Atlantic) – Zn (? m)

OVERALL: Net = -395.5 ha; Rate = -14.59 % yr<sup>-1</sup>; Perc Final = 3 % > decrease

DECADAL: YES (24 yr)

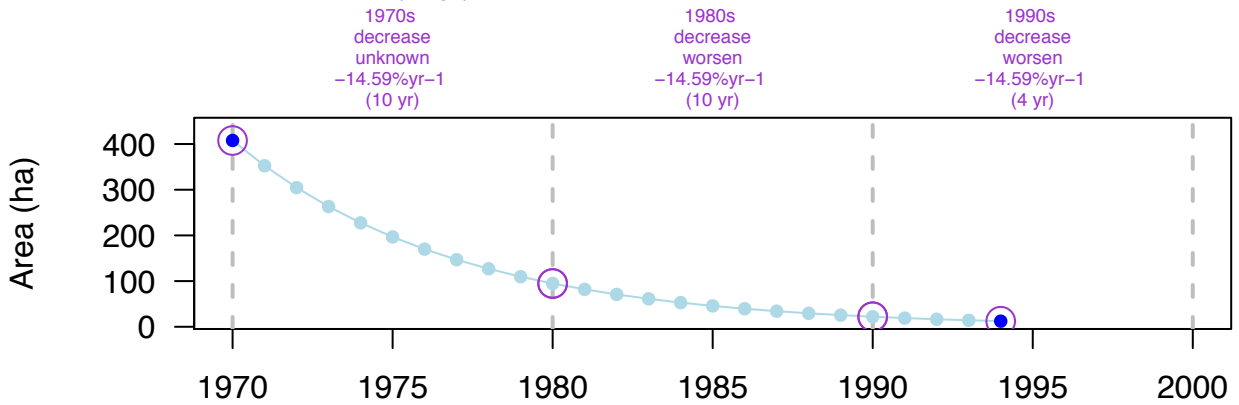

809\_area

Kastler and Michaelis 1999

SITE: Baltrum (Germany – Atlantic) – Zn (? m)

OVERALL: Net = -178.6 ha; Rate = NA % yr<sup>-1</sup>; Perc Final = NA % > decrease

DECADAL: YES (24 yr)

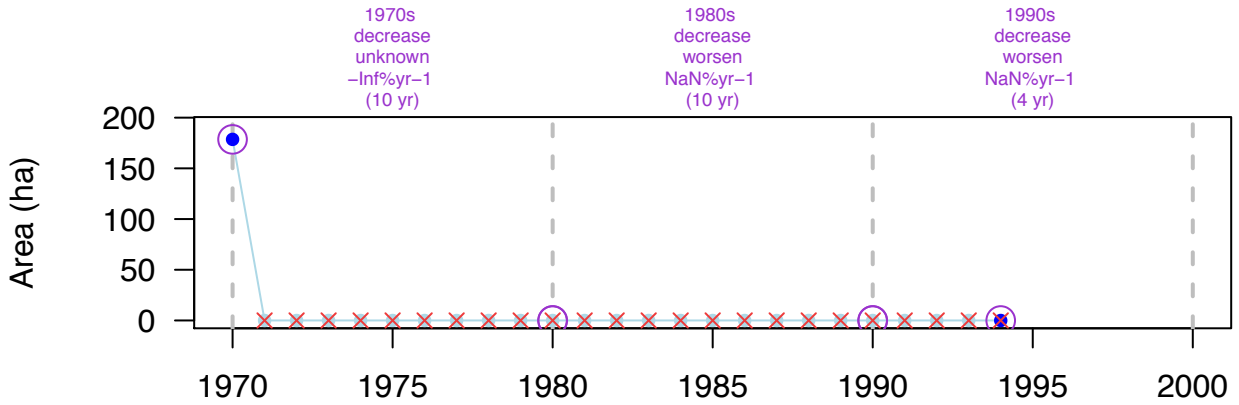

810\_area

Kastler and Michaelis 1999

SITE: Langeoog (Germany – Atlantic) – Zn (? m)

OVERALL: Net = -332.9 ha; Rate = -14.2 % yr<sup>-1</sup>; Perc Final = 3 % > decrease

DECADAL: YES (24 yr)

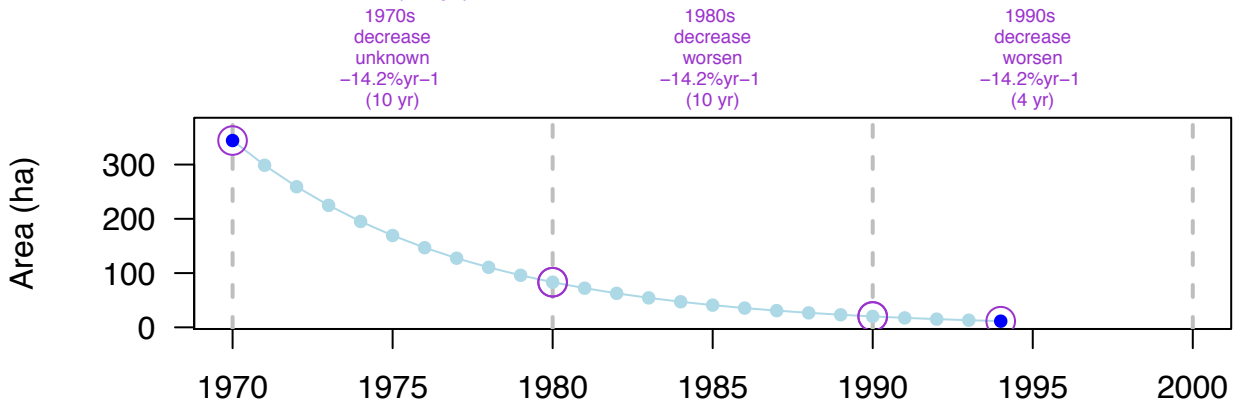

811\_area

Kastler and Michaelis 1999

SITE: Spiekeroog (Germany – Atlantic) – Zn (? m)

OVERALL: Net = -249.3 ha; Rate = -14.67 % yr<sup>-1</sup>; Perc Final = 3 % > decrease

DECADAL: YES (24 yr)

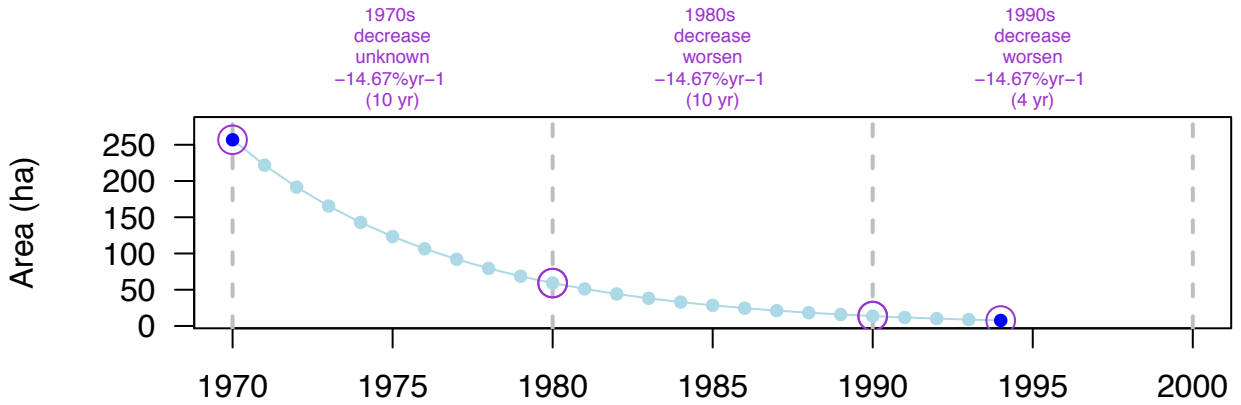

812\_area

Kastler and Michaelis 1999

SITE: Wangerooge (Germany – Atlantic) – Zn (? m)

OVERALL: Net = -32.7 ha; Rate = -3.8 % yr<sup>-1</sup>; Perc Final = 40 % > decrease

DECADAL: YES (24 yr)

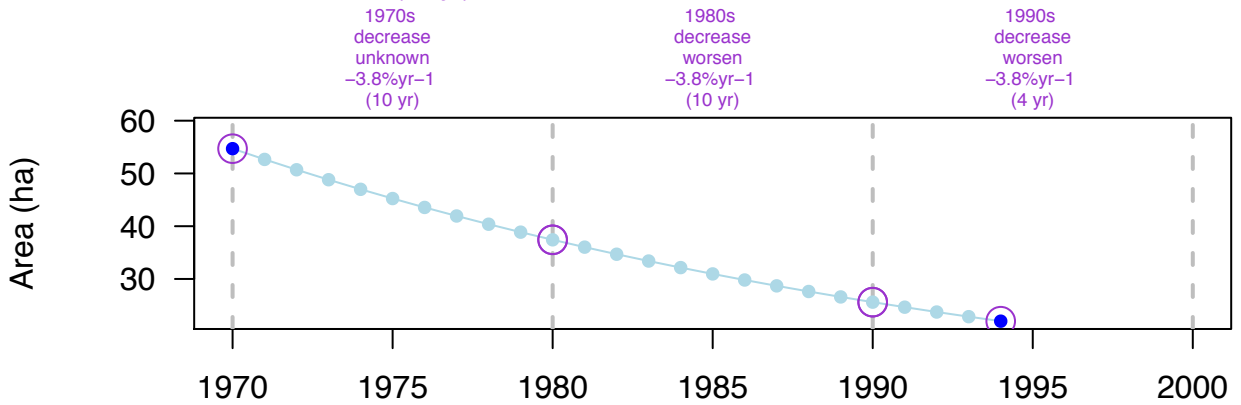

813\_area

Kastler and Michaelis 1999

SITE: Wilhelmshaven (Germany – Atlantic) – Zn (? m)

OVERALL: Net = -175.1 ha; Rate = -1.66 % yr<sup>-1</sup>; Perc Final = 67 % > decrease

DECADAL: YES (24 yr)

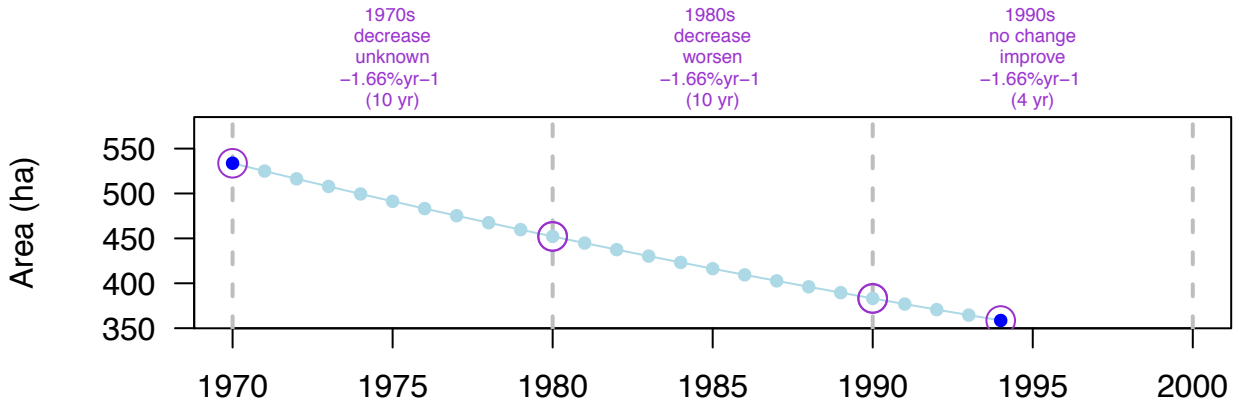

814\_area

Kastler and Michaelis 1999

SITE: Jade Bright (Germany – Atlantic) – Zn (? m)

OVERALL: Net = -257 ha; Rate = NA % yr<sup>-1</sup>; Perc Final = NA % > decrease

DECADAL: YES (24 yr)

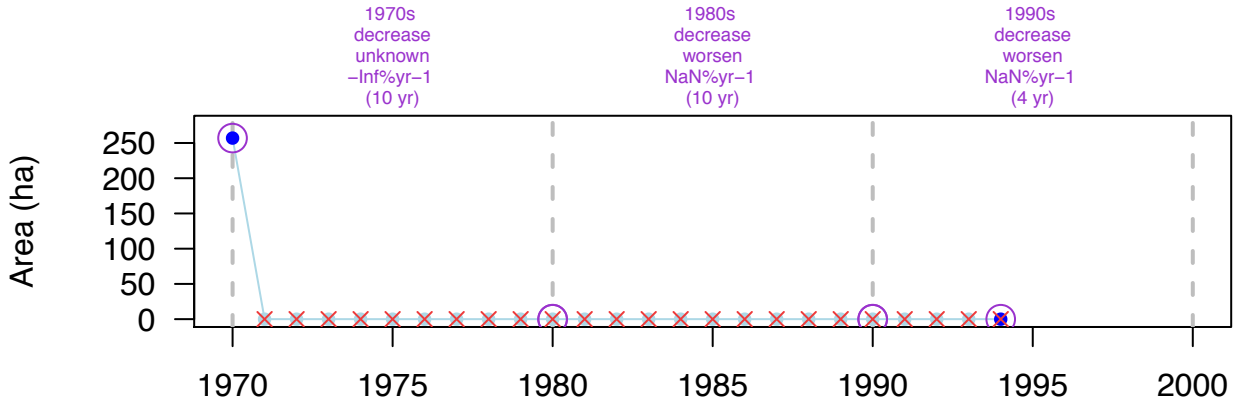

815\_area

Kastler and Michaelis 1999

SITE: Weser Estuary (Germany – Atlantic) – Zn (? m)

OVERALL: Net = -503.5 ha; Rate = -13.98 % yr<sup>-1</sup>; Perc Final = 3 % > decrease

DECADAL: YES (24 yr)

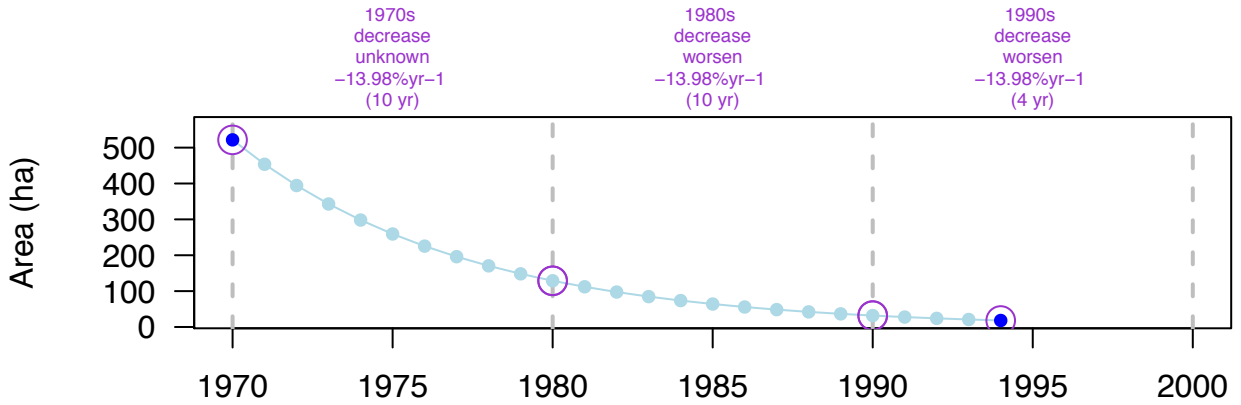

816\_area

Kastler and Michaelis 1999

SITE: Bremerhaven (Germany – Atlantic) – Zn (? m)

OVERALL: Net = -2.8 ha; Rate = -0.06 % yr<sup>-1</sup>; Perc Final = 99 % > no change

DECADAL: YES (24 yr)

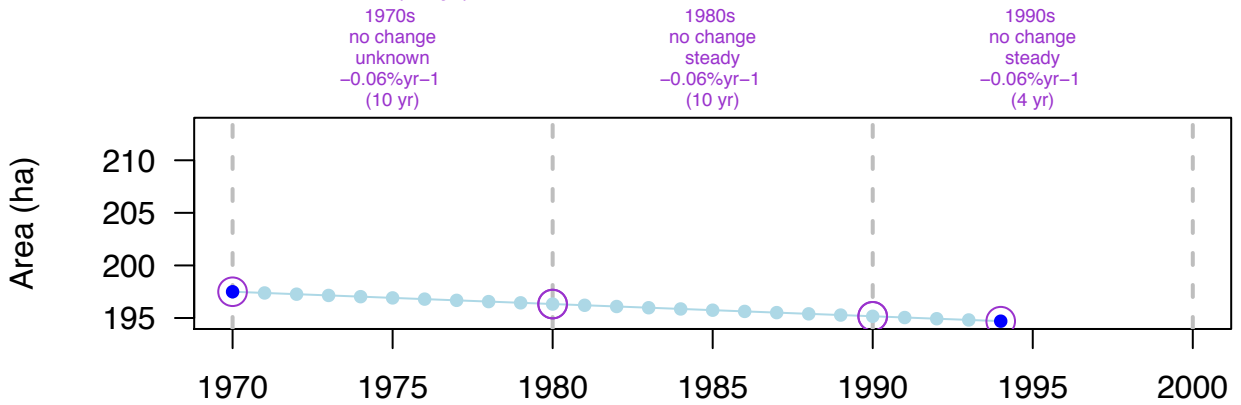



817\_density

Jakl et al. 2015

SITE: Cuska Dumboka (Croatia – Mediterranean) – Po (? m)

OVERALL: Net = 4.31 shoot m<sup>-2</sup>; Rate = 0.82 % yr<sup>-1</sup>; Perc Final = 102 % > no change

DECADAL: NO (3 yr)

Shoot density (shoot m<sup>-2</sup>)

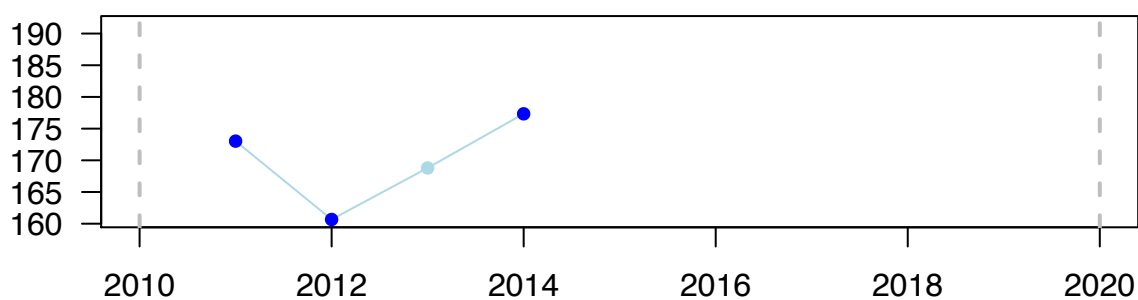

818\_density

Jakl et al. 2015

SITE: Kobiljak (Croatia – Mediterranean) – Po (? m)

OVERALL: Net = 14.62 shoot m<sup>-2</sup>; Rate = 2.51 % yr<sup>-1</sup>; Perc Final = 108 % > no change

DECADAL: NO (3 yr)

Shoot density (shoot m<sup>-2</sup>)

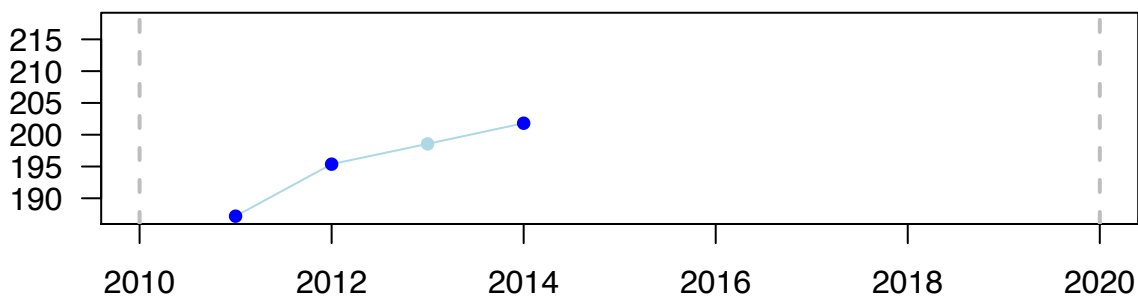

819\_density

Jakl et al. 2015

SITE: Lucica (Croatia – Mediterranean) – Po (? m)

OVERALL: Net = 65 shoot m<sup>-2</sup>; Rate = 9.15 % yr<sup>-1</sup>; Perc Final = 132 % > increase

DECADAL: NO (3 yr)

Shoot density (shoot m<sup>-2</sup>)

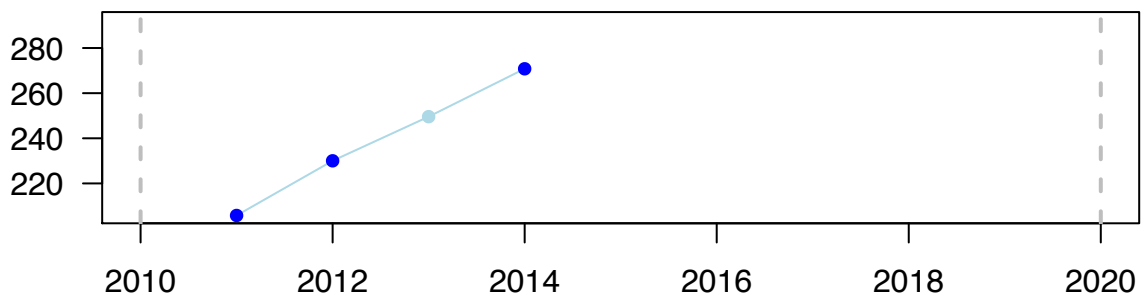

820\_density

Jakl et al. 2015

SITE: Sestrica (Croatia – Mediterranean) – Po (? m)

OVERALL: Net = -4.99 shoot m<sup>-2</sup>; Rate = -0.72 % yr<sup>-1</sup>; Perc Final = 98 % > no change

DECADAL: NO (3 yr)

Shoot density (shoot m<sup>-2</sup>)

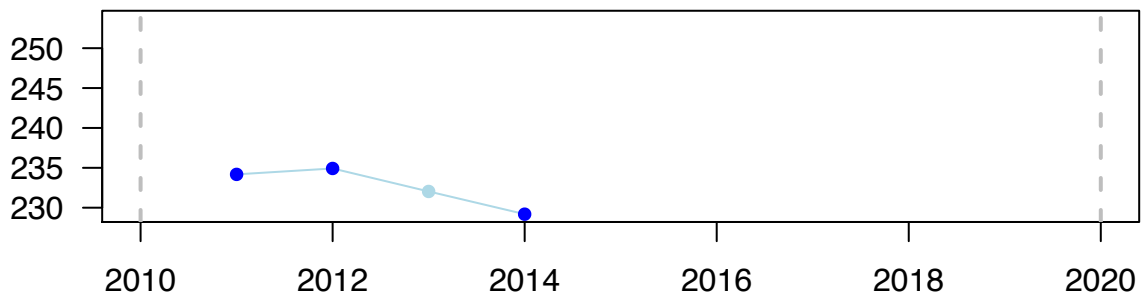

821\_density

Jakl et al. 2015

SITE: Garmenjak (Croatia – Mediterranean) – Po (? m)

OVERALL: Net = -2.32 shoot m<sup>-2</sup>; Rate = -0.22 % yr<sup>-1</sup>; Perc Final = 99 % > no change

DECADAL: NO (3 yr)

Shoot density (shoot m<sup>-2</sup>)

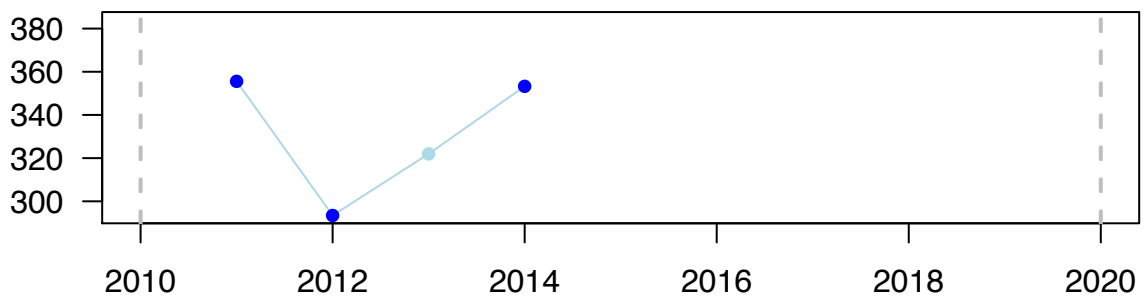

830\_area

Bertelli et al. 2017

SITE: Angle Bay (United Kingdom – Atlantic) – Zn (? m)

OVERALL: Net = 35.46 ha; Rate = 10.27 % yr<sup>-1</sup>; Perc Final = 779 % > increase

DECADAL: YES (20 yr)

Area (ha)

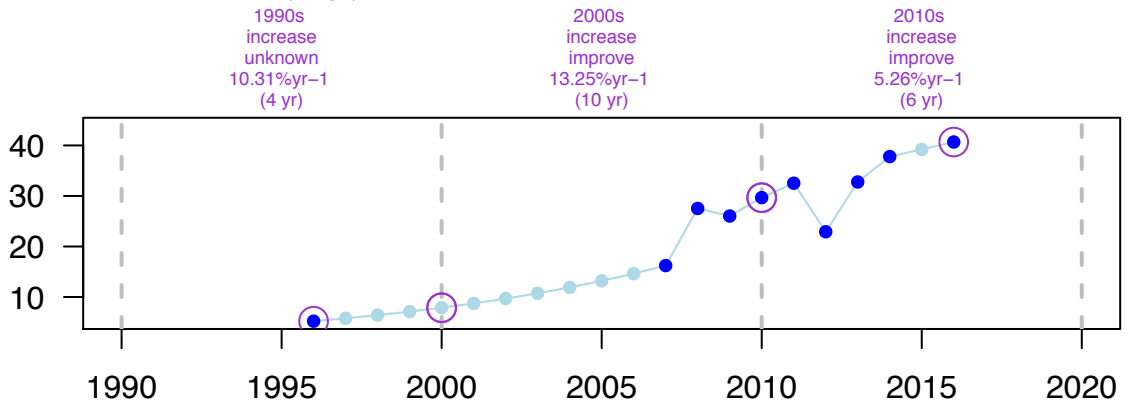

830\_cover

Bertelli et al. 2017

SITE: Angle Bay (United Kingdom – Atlantic) – Zn (? m)

OVERALL: Net = -0.28 %; Rate = -0.04 % yr<sup>-1</sup>; Perc Final = 99 % > no change

DECADAL: YES (20 yr)

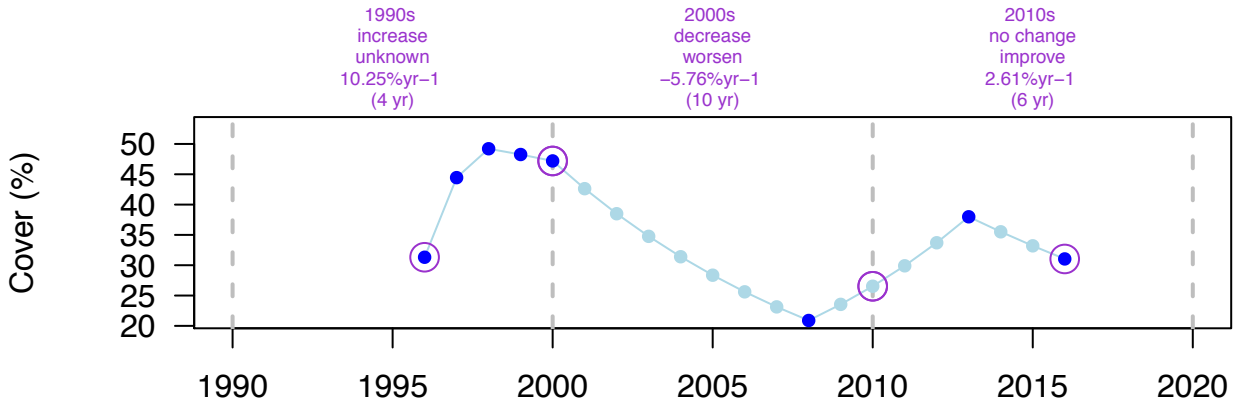

831\_area

Bertelli et al. 2017

SITE: Carew (United Kingdom – Atlantic) – Zn (? m)

OVERALL: Net = 3.74 ha; Rate = 9.72 % yr<sup>-1</sup>; Perc Final = 218 % > increase

DECADAL: YES (8 yr)

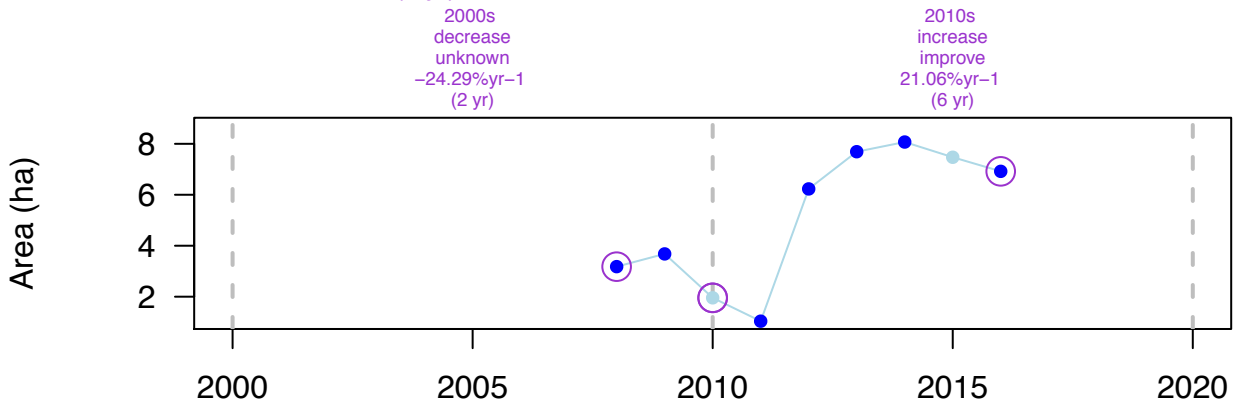

832\_area

Bertelli et al. 2017

SITE: Cosheston (United Kingdom – Atlantic) – Zn (? m)

OVERALL: Net = 0.45 ha; Rate = 17.6 % yr<sup>-1</sup>; Perc Final = 288 % > increase

DECADAL: NO (6 yr)

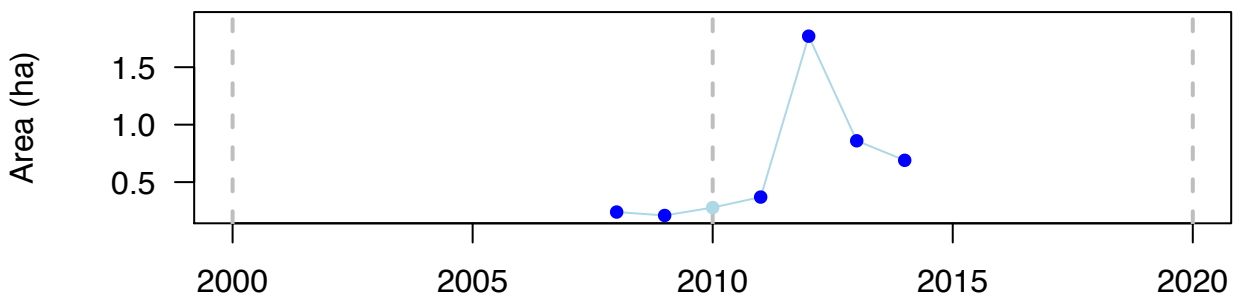

833\_area

Bertelli et al. 2017

SITE: Garron pill (United Kingdom – Atlantic) – Zn (? m)

OVERALL: Net = 0.13 ha; Rate = 0.35 % yr<sup>-1</sup>; Perc Final = 103 % > no change

DECADAL: YES (8 yr)

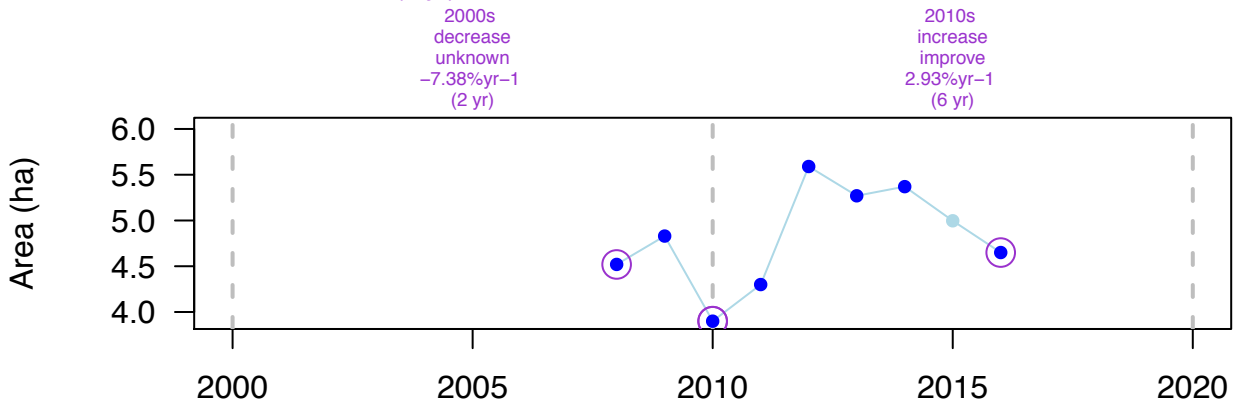

834\_area

Bertelli et al. 2017

SITE: Hobbs point (United Kingdom – Atlantic) – Zn (? m)

OVERALL: Net = 1.4 ha; Rate = 6.41 % yr<sup>-1</sup>; Perc Final = 167 % > increase

DECADAL: YES (8 yr)

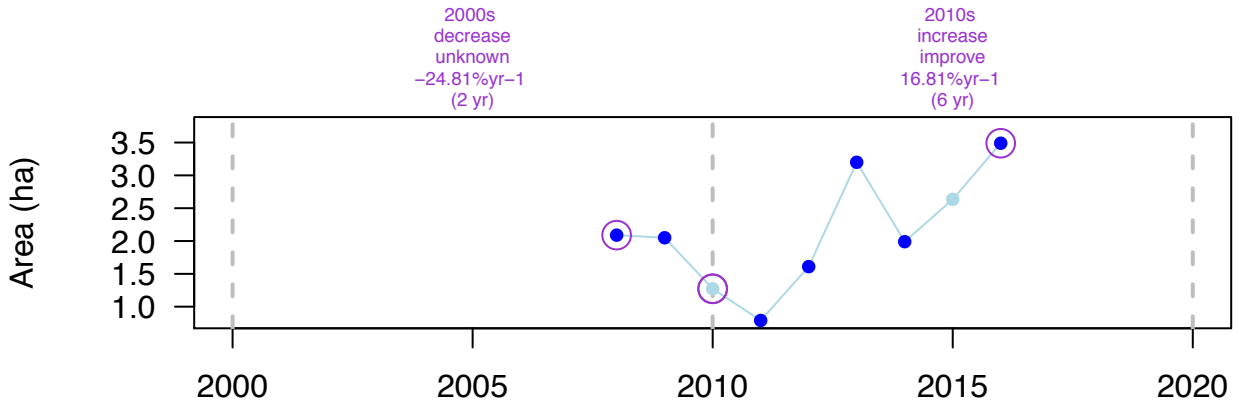

835\_area

Bertelli et al. 2017

SITE: Pembroke river (United Kingdom – Atlantic) – Zn (? m)

OVERALL: Net = 42.42 ha; Rate = 8.17 % yr<sup>-1</sup>; Perc Final = 177 % > increase

DECADAL: NO (7 yr)

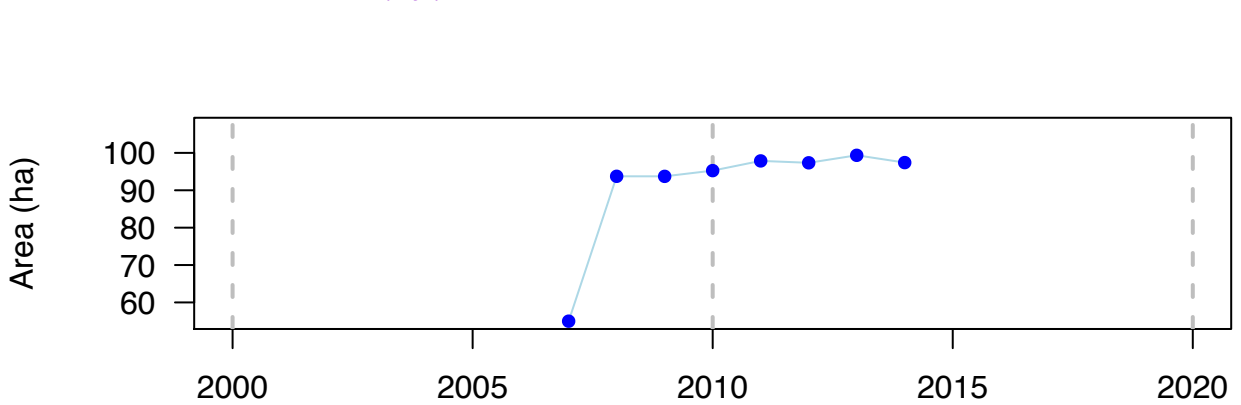

835\_cover

Bertelli et al. 2017

SITE: Pembroke river (United Kingdom – Atlantic) – Zn (? m)

OVERALL: Net = 5.99 %; Rate = 1.31 % yr<sup>-1</sup>; Perc Final = 108 % > no change

DECADAL: NO (6 yr)

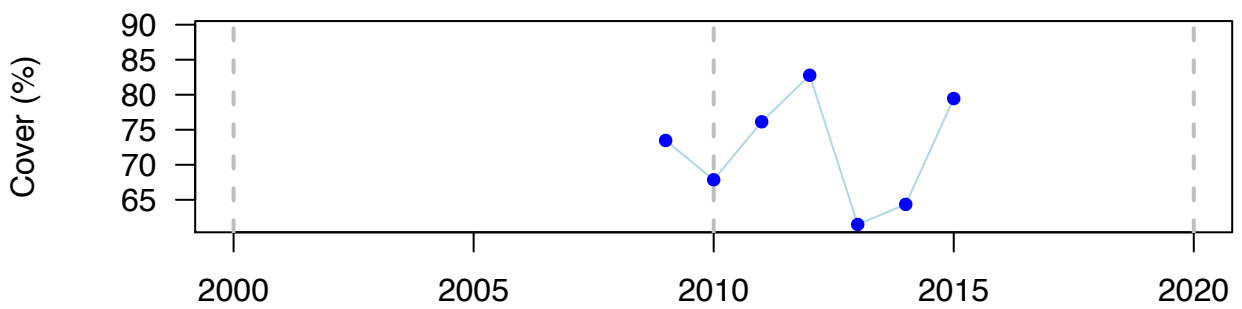

836\_area

Bertelli et al. 2017

SITE: Pwllcrochan flats (United Kingdom – Atlantic) – Zn (? m)

OVERALL: Net = 3.68 ha; Rate = 39 % yr<sup>-1</sup>; Perc Final = 2265 % > increase

DECADAL: YES (8 yr)

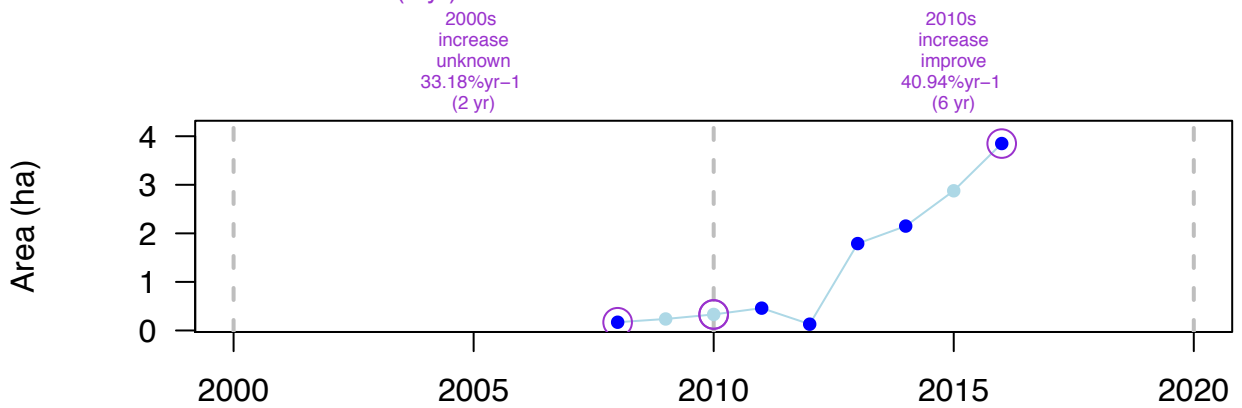

837\_area

Bertelli et al. 2017

SITE: Sprinkle pill (United Kingdom – Atlantic) – Zn (? m)

OVERALL: Net = 0.16 ha; Rate = 8.66 % yr<sup>-1</sup>; Perc Final = 200 % > increase

DECADAL: YES (8 yr)

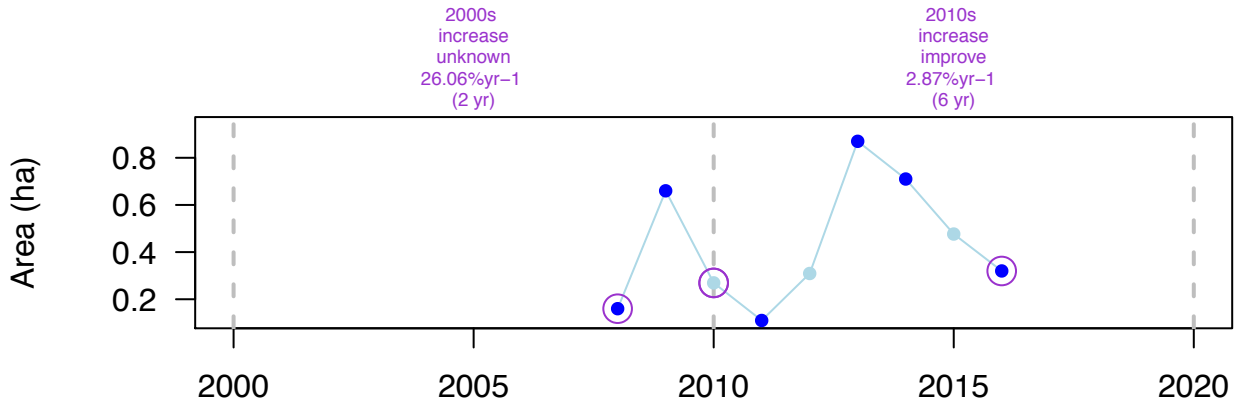

856\_density

Lorenti et al. 2005

SITE: Lacco Ameno (Italy – Mediterranean) – Po (-5 m)

OVERALL: Net = -106.06 shoot m<sup>-2</sup>; Rate = -13.98 % yr<sup>-1</sup>; Perc Final = 76 % > no change

DECADAL: NO (2 yr)

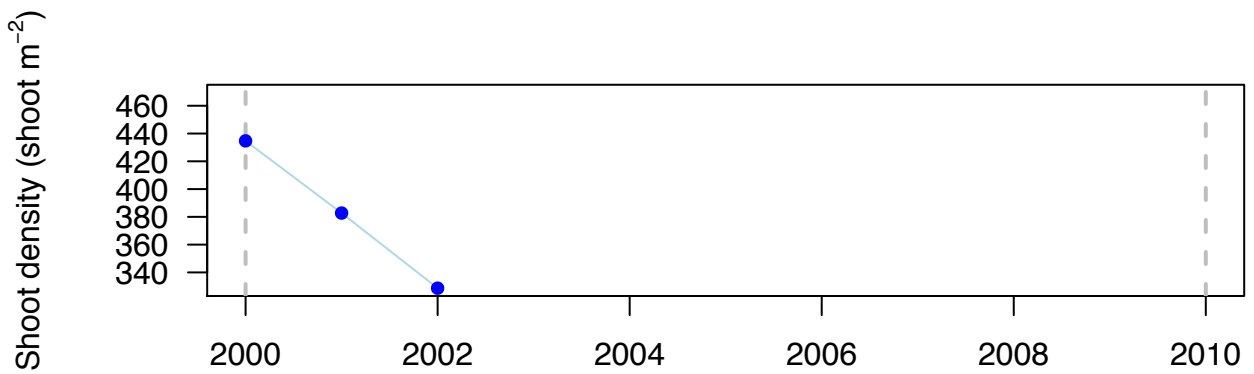



857\_density

Lorenti et al. 2005

SITE: Lacco Ameno (Italy – Mediterranean) – Po (-10 m)

OVERALL: Net = 5.38 shoot m<sup>-2</sup>; Rate = 0.86 % yr<sup>-1</sup>; Perc Final = 102 % > no change

DECADAL: NO (2 yr)

Shoot density (shoot m<sup>-2</sup>)

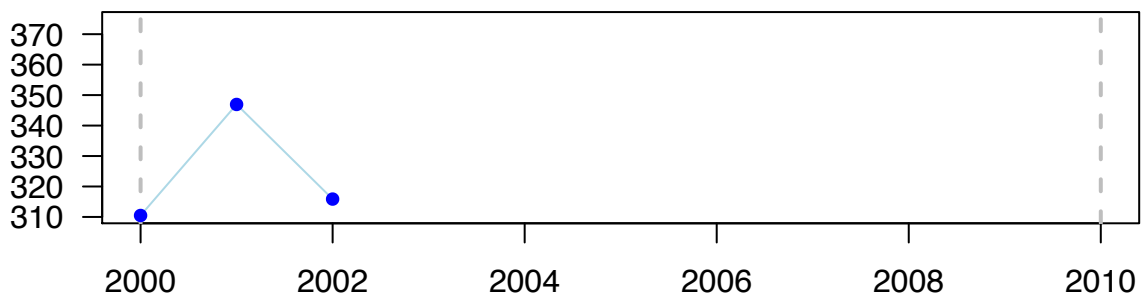

858\_density

Lorenti et al. 2005

SITE: Lacco Ameno (Italy – Mediterranean) – Po (-30 m)

OVERALL: Net = 14.24 shoot m<sup>-2</sup>; Rate = 7.41 % yr<sup>-1</sup>; Perc Final = 116 % > no change

DECADAL: NO (2 yr)

Shoot density (shoot m<sup>-2</sup>)

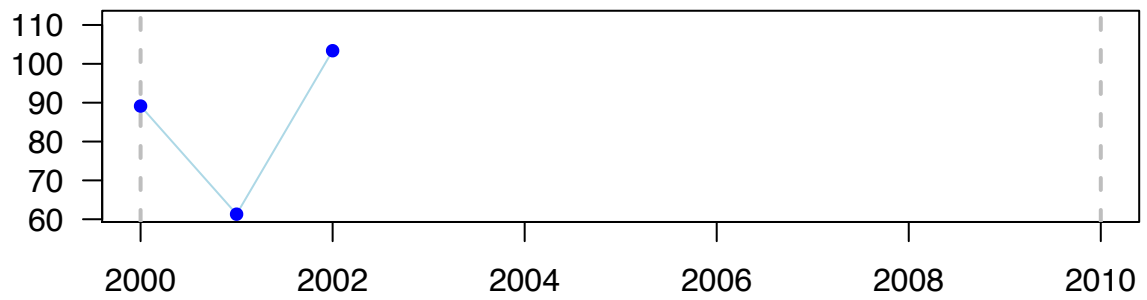

859\_density

Lorenti et al. 2005

SITE: Off Scarrupata (Italy – Mediterranean) – Po (-10 m)

OVERALL: Net = 28.79 shoot m<sup>-2</sup>; Rate = 2.88 % yr<sup>-1</sup>; Perc Final = 106 % > no change

DECADAL: NO (2 yr)

Shoot density (shoot m<sup>-2</sup>)

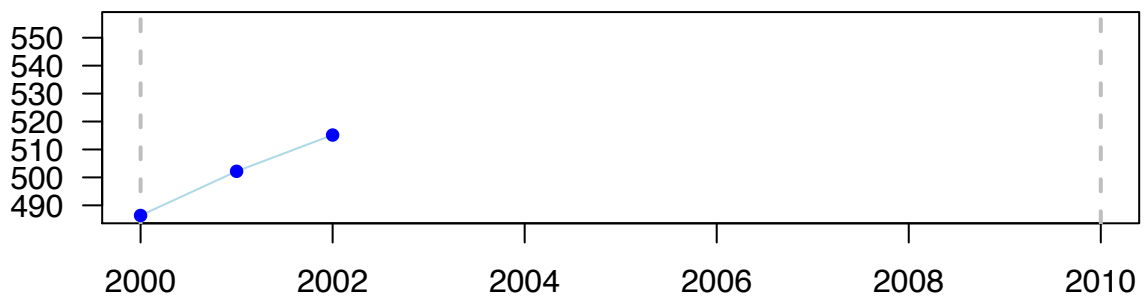

860\_density

Lorenti et al. 2005

SITE: Off Scarrupata (Italy – Mediterranean) – Po (-30 m)

OVERALL: Net = 4.89 shoot m<sup>-2</sup>; Rate = 1.49 % yr<sup>-1</sup>; Perc Final = 103 % > no change

DECADAL: NO (2 yr)

Shoot density (shoot m<sup>-2</sup>)

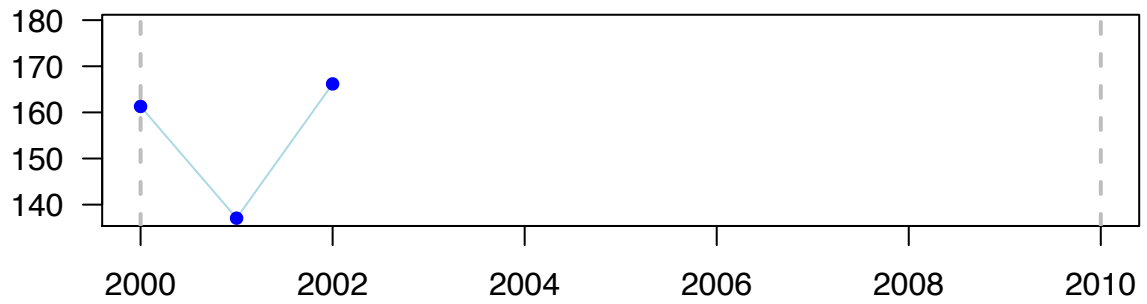

861\_density

Molenaar et al. 2006

SITE: Cap Martin (France – Mediterranean) – Po (-20 m)

OVERALL: Net = -83.64 shoot m<sup>-2</sup>; Rate = -4.8 % yr<sup>-1</sup>; Perc Final = 65 % > decrease

DECADAL: YES (9 yr)

Shoot density (shoot m<sup>-2</sup>)

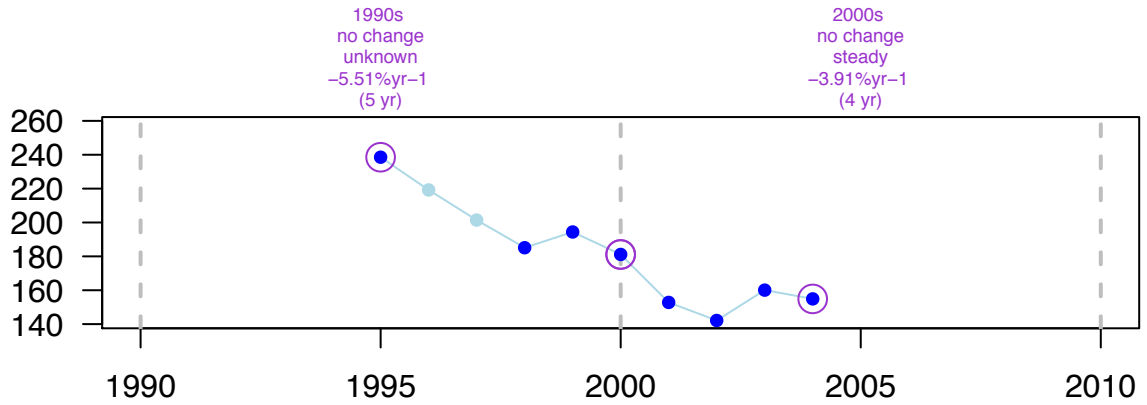

862\_density

Molenaar et al. 2006

SITE: Cap Ferrat (France – Mediterranean) – Po (-20 m)

OVERALL: Net = 62.8 shoot m<sup>-2</sup>; Rate = 1.84 % yr<sup>-1</sup>; Perc Final = 118 % > no change

DECADAL: YES (9 yr)

Shoot density (shoot m<sup>-2</sup>)

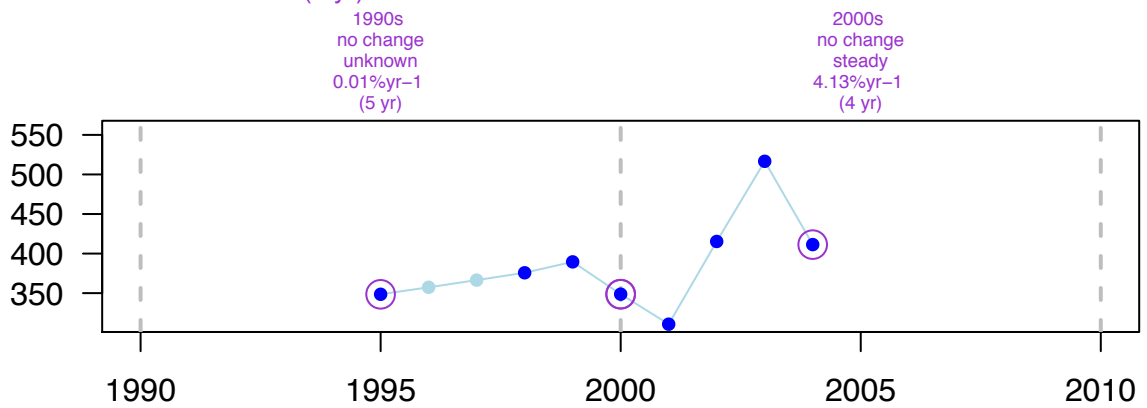

863\_density

Molenaar et al. 2009

SITE: Cap d'Antibes (France – Mediterranean) – Po (-6 m)

OVERALL: Net = -50.7 shoot m<sup>-2</sup>; Rate = -1.32 % yr<sup>-1</sup>; Perc Final = 88 % > no change

DECADAL: YES (10 yr)

Shoot density (shoot m<sup>-2</sup>)

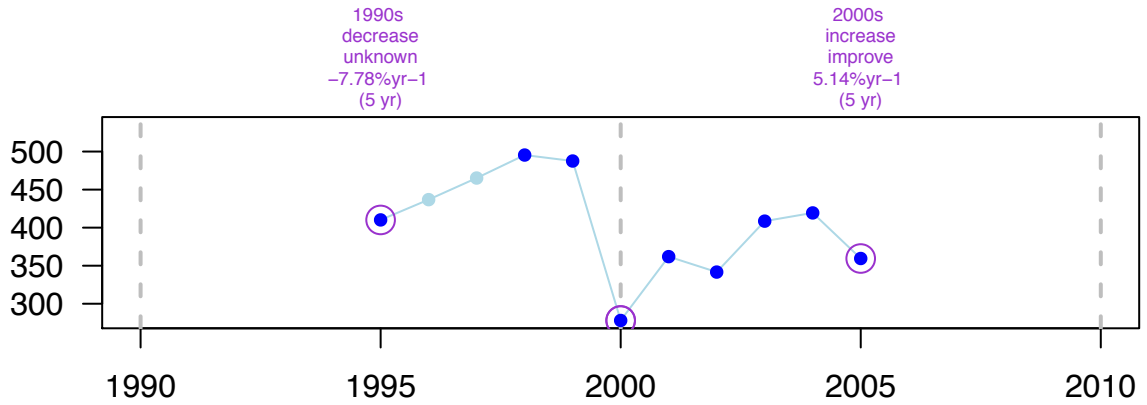

864\_density

Molenaar et al. 2009

SITE: Cap Martin (France – Mediterranean) – Po (-6 m)

OVERALL: Net = -551.47 shoot m<sup>-2</sup>; Rate = -16.28 % yr<sup>-1</sup>; Perc Final = 20 % > decrease

DECADAL: YES (10 yr)

Shoot density (shoot m<sup>-2</sup>)

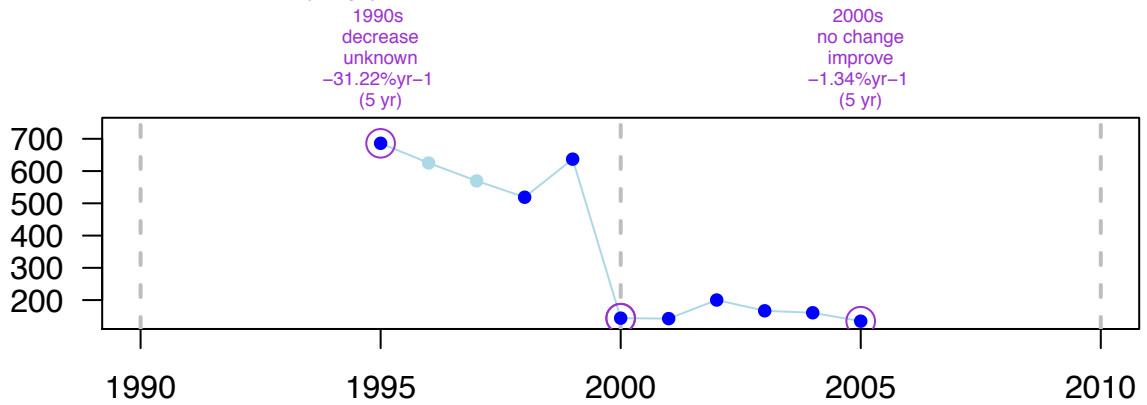

875\_area

Procaccini et al. 2003

SITE: Islas Medes (entire) (Spain – Mediterranean) – Po (? m)

OVERALL: Net = 0 ha; Rate = 0 % yr<sup>-1</sup>; Perc Final = 100 % > no change

DECADAL: YES (17 yr)

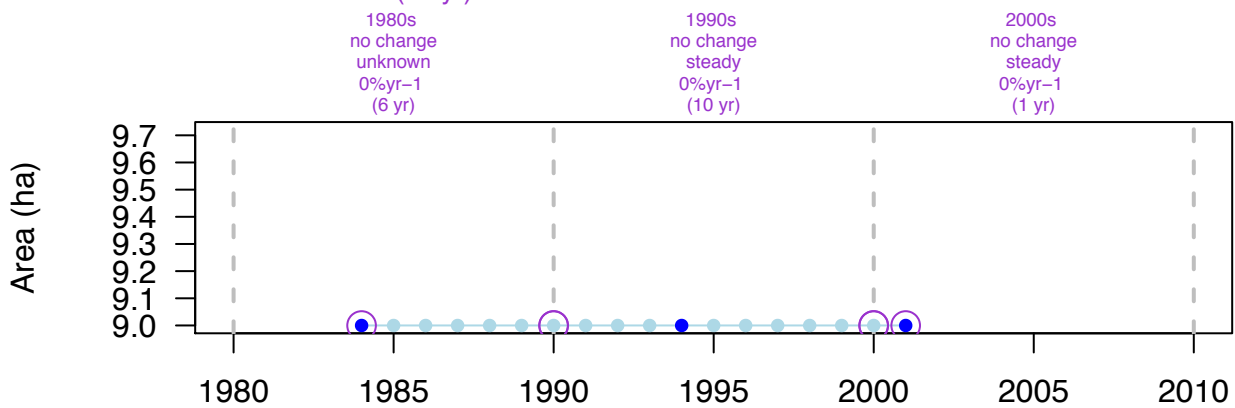

Supplement: 41467_2019_11340_MOESM6_ESM.pdf [file 41467_2019_11340_MOESM6_ESM.pdf]
