# Supplementary material for: Recent trend reversal for declining European seagrass meadows
Source: PubMed Central journal article supplement (PMC6659699; doi:10.1038/s41467-019-11340-4), 2019-07-26
Supplement: 41467_2019_11340_MOESM1_ESM.pdf [file 41467_2019_11340_MOESM1_ESM.pdf]

# **Recent trend reversal for declining European seagrass meadows**

de los Santos *et al.*, 2019

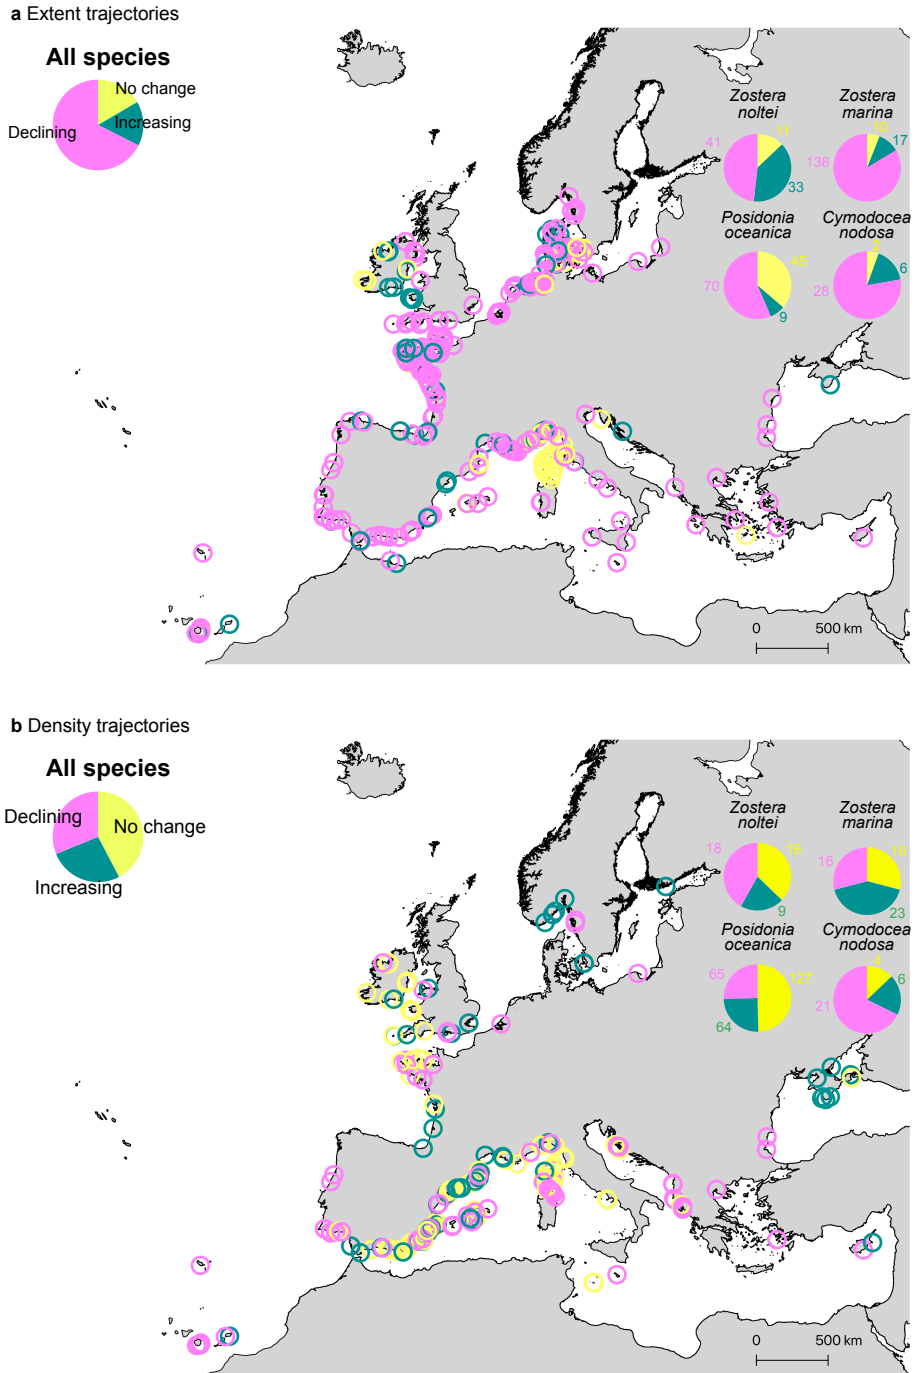

**Supplementary Figure 1.** Distribution of compiled seagrass sites in Europe and their trajectories. Seagrass sites in Europe showing no change (yellow circles,  $n = 68$  for extent and  $n = 163$  for density), increase (green circles,  $n = 65$  for extent and  $n = 102$  for density), and decline (magenta circles,  $n = 277$  for extent and  $n = 120$  for density) trajectories between 1869 and 2016 for (A) extent metrics (occurrence, area, depth limits) and (B) density metrics (cover, shoot density, biomass). Pie charts show the overall and species-specific frequencies of trajectories. Number of sites per trajectories for each species is given next to the pie charts. Trajectories are based on the available time-series reports and thus correspond to different time windows.

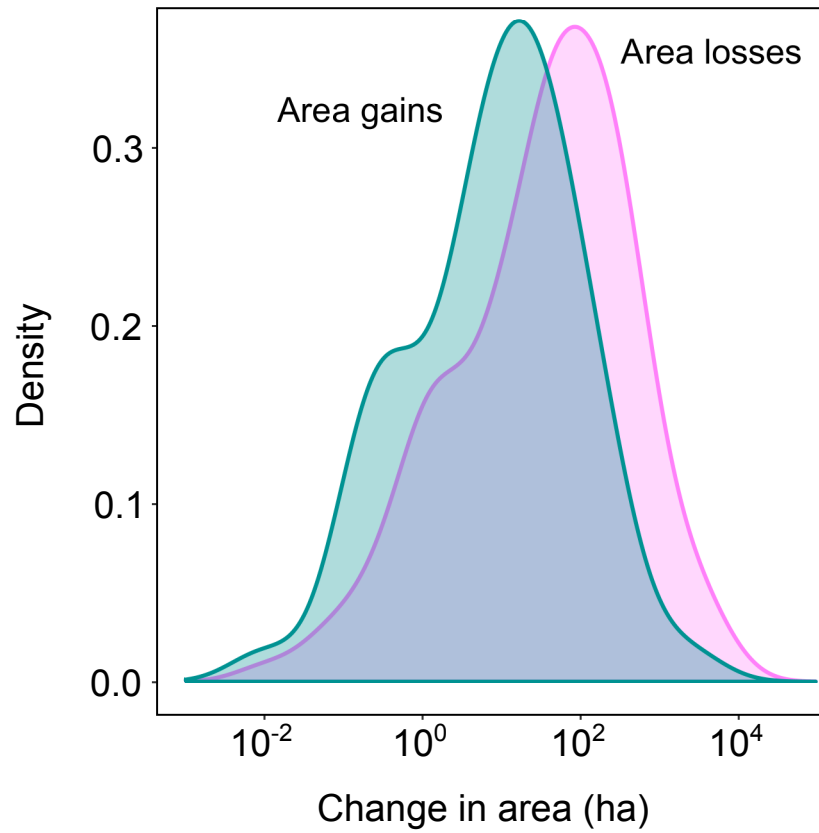

**Supplementary Figure 2.** Changes in seagrass area for the compiled sites in Europe. Density plots for the losses (magenta,  $n = 136$ ) and gains (green,  $n = 56$ ) in area of European seagrasses compiled between 1869 and 2016. Note the  $\log_{10}$  x-scale.

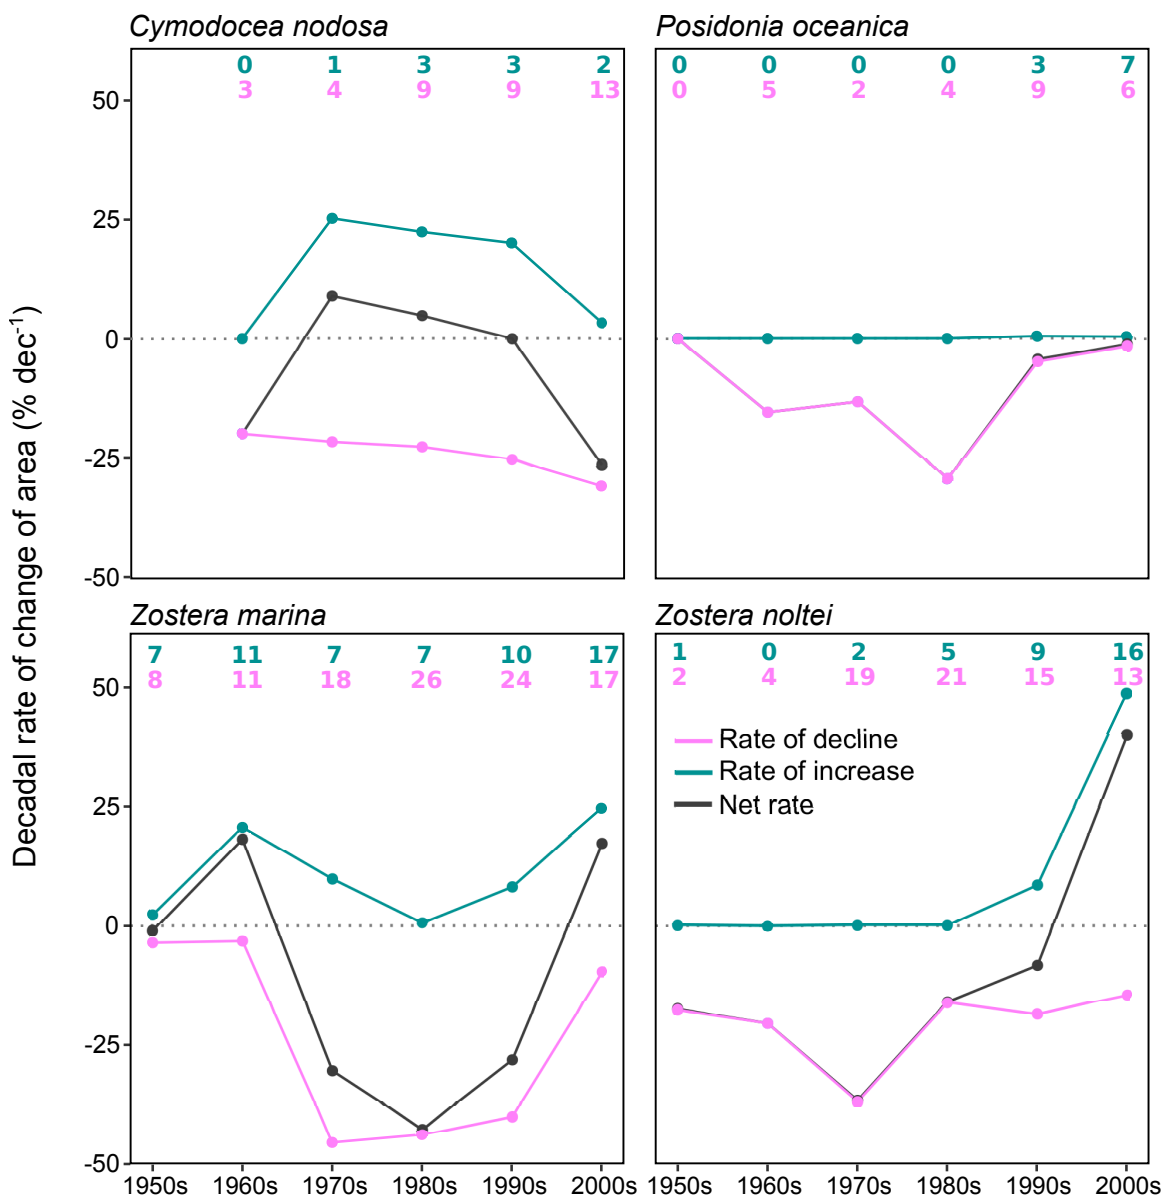

**Supplementary Figure 3.** Decadal rate of change of area of European seagrass species (1950s – 2000s). Decadal analysis includes time-series > 8 years. Number of sites per decade and trajectory are given at the top of the plot.

**Supplementary Table 1.** Nature of the combination of multiple causes in documented seagrass losses.

| <b>Cause 1</b>            | <b>Cause 2</b>       | <b>Cause 3</b>    | <b>N</b> |
|---------------------------|----------------------|-------------------|----------|
| Coastal modification      | Extreme events       |                   | 1        |
| Coastal modification      | Mechanical damage    |                   | 3        |
| Extreme events            | Mechanical damage    |                   | 2        |
| Extreme events            | Overgrazing          |                   | 2        |
| Extreme events            | Algae invasion       |                   | 1        |
| Mechanical damage         | Algae invasion       |                   | 1        |
| Water quality degradation | Coastal modification |                   | 7        |
| Water quality degradation | Extreme events       |                   | 1        |
| Water quality degradation | Mechanical damage    |                   | 3        |
| Water quality degradation | Overgrazing          |                   | 1        |
| Coastal modification      | Extreme events       | Mechanical damage | 1        |
| Water quality degradation | Coastal modification | Extreme events    | 2        |
| Water quality degradation | Coastal modification | Mechanical damage | 1        |
| Water quality degradation | Coastal modification | Wasting disease   | 1        |

N: number of sites reported per each combination.
