# Supplementary material for: Recent trend reversal for declining European seagrass meadows
Source: PubMed Central journal article supplement (PMC6659699; doi:10.1038/s41467-019-11340-4), 2019-07-26
Supplement: 41467_2019_11340_MOESM4_ESM.pdf [file 41467_2019_11340_MOESM4_ESM.pdf]

## **Description of Additional Supplementary Files**

**File Name:** Supplementary Data 1

**Description:** Dataset of compiled studies reporting changes in extent and/or density of seagrass sites in Europe, with time-windows from 1869 to 2016. Metadata and list of sources are given within the file.

**File Name:** Supplementary Data 2

**Description:** Visualisation of the compiled time-series of extent and/or density of seagrass sites in Europe, with time-windows from 1869 to 2016. Elements shown in each figure are explained within the file.
